# Supplementary material for: Identification of Circulating miRNAs in a Mouse Model of Nerve Allograft Transplantation under FK506 Immunosuppression by Illumina Small RNA Deep Sequencing
Source: Dis Markers. 2015 Sep 8;2015:863192. doi: 10.1155/2015/863192 (PMC4578739; doi:10.1155/2015/863192)
Supplement: Supplementary file 1 — Expression profile of the miRNAs by Illumina small RNA deep sequencing. [file 863192.f1.zip › 863192.f1/Supplementary file 1.xls]

## Sheet: Table S1
Table S1 Summary of Illumina small RNA deep sequencing data for small RNAs in the sera of C57BL/6 mice receiving allograft transplantation with or without FK506 immunosuppression
A. with FK506 immunosuppression for 3d						B. with FK506 immunosuppression for 7d						C. with FK506 immunosuppression for 14d
Category	unique sRNAs	%	total sRNAs	%		Category	unique sRNAs	%	total sRNAs	%		Category	unique sRNAs	%	total sRNAs	%
Total	120429	1	5458187	1		Total	74661	1	5272112	1		Total	76710	1	5670065	1
Mapping to genome	8170	0.0678	2689173	0.4927		Mapping to genome	7328	0.0982	2853061	0.5412		Mapping to genome	6681	0.0871	2750572	0.4851
exon_antisense	49	0.0004	153	0		exon_antisense	23	0.0003	38	0		exon_antisense	17	0.0002	29	0
exon_sense	725	0.006	4393	0.0008		exon_sense	1226	0.0164	3898	0.0007		exon_sense	955	0.0124	3769	0.0007
intron_antisense	181	0.0015	580	0.0001		intron_antisense	49	0.0007	113	0		intron_antisense	45	0.0006	74	0
intron_sense	339	0.0028	1233	0.0002		intron_sense	302	0.004	641	0.0001		intron_sense	283	0.0037	652	0.0001
miRNA	1110	0.0092	2602557	0.4768		miRNA	971	0.013	2763676	0.5242		miRNA	980	0.0128	2657576	0.4687
rRNA	29693	0.2466	241688	0.0443		rRNA	19133	0.2563	152495	0.0289		rRNA	18245	0.2378	149760	0.0264
repeat	816	0.0068	2815	0.0005		repeat	297	0.004	714	0.0001		repeat	286	0.0037	660	0.0001
scRNA	45	0.0004	957	0.0002		scRNA	17	0.0002	144	0		scRNA	16	0.0002	194	0
snRNA	429	0.0036	1930	0.0004		snRNA	171	0.0023	1196	0.0002		snRNA	178	0.0023	1505	0.0003
snoRNA	553	0.0046	4753	0.0009		snoRNA	169	0.0023	710	0.0001		snoRNA	237	0.0031	1308	0.0002
srpRNA	94	0.0008	678	0.0001		srpRNA	89	0.0012	658	0.0001		srpRNA	84	0.0011	465	0.0001
tRNA	4990	0.0414	26457	0.0048		tRNA	3764	0.0504	16238	0.0031		tRNA	3882	0.0506	22525	0.004
unann	81405	0.676	2569993	0.4709		unann	48450	0.6489	2331591	0.4422		unann	51502	0.6714	2831548	0.4994
D. without FK506 immunosuppression for 3d						E. without FK506 immunosuppression for 7d						F. without FK506 immunosuppression for 14d
Category	unique sRNAs	%	total sRNAs	%		Category	unique sRNAs	%	total sRNAs	%		Category	unique sRNAs	%	total sRNAs	%
Total	127896	1	5199001	1		Total	76673	1	5710818	1		Total	157717	1	5334192	1
Mapping to genome	7356	0.0575	2615969	0.5032		Mapping to genome	10101	0.1317	3120416	0.5464		Mapping to genome	6412	0.0407	2574471	0.4826
exon_antisense	25	0.0002	42	0		exon_antisense	29	0.0004	42	0		exon_antisense	31	0.0002	47	0
exon_sense	1186	0.0093	1942	0.0004		exon_sense	2243	0.0293	4111	0.0007		exon_sense	809	0.0051	2255	0.0004
intron_antisense	90	0.0007	165	0		intron_antisense	87	0.0011	121	0		intron_antisense	91	0.0006	144	0
intron_sense	304	0.0024	428	0.0001		intron_sense	662	0.0086	855	0.0001		intron_sense	359	0.0023	543	0.0001
miRNA	1088	0.0085	2590795	0.4983		miRNA	1640	0.0214	3088195	0.5408		miRNA	1081	0.0069	2555335	0.479
rRNA	21610	0.169	78461	0.0151		rRNA	17735	0.2313	80504	0.0141		rRNA	25702	0.163	92593	0.0174
repeat	431	0.0034	738	0.0001		repeat	806	0.0105	1190	0.0002		repeat	552	0.0035	817	0.0002
scRNA	15	0.0001	60	0		scRNA	33	0.0004	258	0		scRNA	18	0.0001	30	0
snRNA	344	0.0027	1226	0.0002		snRNA	320	0.0042	2088	0.0004		snRNA	325	0.0021	1205	0.0002
snoRNA	165	0.0013	414	0.0001		snoRNA	249	0.0032	971	0.0002		snoRNA	127	0.0008	279	0.0001
srpRNA	91	0.0007	215	0		srpRNA	112	0.0015	377	0.0001		srpRNA	63	0.0004	178	0
tRNA	5104	0.0399	16657	0.0032		tRNA	4474	0.0584	11512	0.002		tRNA	6248	0.0396	17624	0.0033
unann	97443	0.7619	2507858	0.4824		unann	48283	0.6297	2520594	0.4414		unann	122311	0.7755	2663142	0.4993

## Sheet: Table S2
Table S2 The expression patterns of known miRNAs in the six libraries of sera of C57BL/6 mice receiving allograft transplantation with or without FK506 immunosuppression
	miRNA	FK506 3d	FK506 7d	FK506 14d	No FK506 3d	No FK506 7d	No FK506 14d
	mmu-miR-486-5p	2302676	2603634	2494607	2485505	2727053	2448326
	mmu-miR-3107-5p	2296934	2595120	2482905	2479682	2720114	2440098
	mmu-miR-92a-3p	17035	22068	19175	18312	29406	19852
	mmu-miR-25-3p	6038	13644	15427	10353	46077	8768
	mmu-miR-10b-5p	1463	6153	13506	5186	51721	5739
	mmu-miR-191-5p	4383	9325	9978	7727	14835	5614
	mmu-miR-150-5p	426	622	948	3926	9054	5531
	mmu-miR-423-5p	10646	6672	4228	4663	4241	5478
	mmu-let-7c-5p	4542	3321	4566	2733	5961	4206
	mmu-let-7i-5p	8290	9935	9349	2034	6119	2961
	mmu-miR-22-3p	4761	10667	5601	4151	15562	2625
	mmu-miR-16-5p	2098	5121	4598	2793	16659	2549
	mmu-let-7f-5p	21056	7827	8530	1564	5409	2498
	mmu-miR-486-3p	1879	2429	1754	2735	3492	2422
	mmu-miR-181a-5p	94740	5458	7981	2421	7530	2265
	mmu-miR-10a-5p	961	1866	5870	1999	11486	2184
	mmu-miR-30a-5p	6648	7789	7716	2652	21814	2072
	mmu-miR-215-5p	251	818	925	578	7034	1757
	mmu-miR-375-3p	1055	1303	1327	1221	2528	1704
	mmu-miR-30d-5p	2691	2966	2972	1787	5091	1680
	mmu-miR-192-5p	1666	5509	1627	837	8363	1256
	mmu-let-7a-5p	17735	4242	4227	1192	2031	1115
	mmu-miR-27b-3p	8323	1263	1284	821	5856	1098
	mmu-miR-143-3p	6608	597	1047	842	6070	1054
	mmu-let-7g-5p	965	750	711	537	1686	881
	mmu-miR-151-3p	676	1334	998	934	1988	880
	mmu-miR-142-5p	417	670	642	914	4240	822
	mmu-miR-106b-3p	831	1695	989	1038	2668	809
	mmu-miR-21a-5p	857	1164	1226	406	3114	802
	mmu-miR-451a	523	796	1326	765	4012	776
	mmu-miR-140-3p	1193	2335	1680	1222	3746	759
	mmu-miR-93-5p	591	1762	1407	979	3228	742
	mmu-miR-133a-3p	370	418	945	1281	2138	618
	mmu-miR-103-3p	1695	853	593	530	2406	516
	mmu-miR-378a-3p	698	1310	1130	928	2193	514
	mmu-miR-320-3p	1450	844	543	465	796	487
	mmu-let-7b-5p	975	278	268	358	761	486
	mmu-miR-125a-5p	1379	221	433	367	747	447
	mmu-miR-328-3p	311	328	217	524	714	440
	mmu-miR-484	260	357	292	526	978	427
	mmu-miR-107-3p	690	475	153	457	1872	422
	mmu-miR-148a-3p	344	661	449	229	1995	400
	mmu-miR-423-3p	879	387	297	706	955	398
	mmu-miR-30e-5p	580	696	775	459	4077	395
	mmu-miR-181b-5p	8327	680	892	260	993	376
	mmu-miR-26a-5p	8982	867	1076	323	1411	358
	mmu-miR-186-5p	698	692	922	537	2313	345
	mmu-miR-99b-5p	729	147	191	316	698	337
	mmu-miR-3107-3p	306	373	247	324	421	320
	mmu-let-7d-5p	652	1006	766	336	610	317
	mmu-miR-126-5p	458	180	234	182	2099	316
	mmu-miR-744-5p	1302	645	425	317	468	314
	mmu-let-7d-3p	335	266	258	529	756	242
	mmu-miR-676-3p	225	317	430	335	474	235
	mmu-miR-1198-5p	127	310	181	319	568	229
	mmu-miR-92b-3p	2651	97	109	174	145	162
	mmu-miR-221-3p	257	211	141	287	582	149
	mmu-miR-181c-5p	1344	336	336	209	864	145
	mmu-miR-425-5p	76	174	185	120	388	145
	mmu-miR-128-3p	1348	109	96	282	457	144
	mmu-miR-181d-5p	301	187	260	147	308	123
	mmu-miR-30c-5p	286	332	316	170	744	119
	mmu-miR-127-3p	2567	74	206	136	398	116
	mmu-miR-205-5p	38	57	50	66	160	112
	mmu-miR-199a-3p	34	25	45	53	447	104
	mmu-miR-199b-3p	34	25	45	53	447	104
	mmu-miR-182-5p	71	215	166	61	519	101
	mmu-miR-26b-5p	379	155	195	84	265	98
	mmu-miR-146a-5p	92	55	194	89	384	97
	mmu-miR-15a-5p	157	152	148	90	418	94
	mmu-miR-1839-5p	103	127	130	57	300	94
	mmu-miR-181a-2-3p	102	61	92	150	179	92
	mmu-miR-222-3p	632	109	124	132	289	86
	mmu-miR-130a-3p	284	152	87	88	359	84
	mmu-miR-130b-3p	59	164	81	87	296	73
	mmu-miR-30a-3p	168	86	179	44	228	70
	mmu-miR-144-3p	44	28	43	49	68	69
	mmu-miR-146b-5p	358	81	333	56	347	68
	mmu-miR-532-5p	77	98	119	90	443	66
	mmu-miR-101b-3p	29	77	70	48	261	66
	mmu-miR-125b-5p	552	42	183	65	151	66
	mmu-miR-434-3p	34	20	45	61	133	63
	mmu-miR-98-5p	652	118	104	46	149	60
	mmu-miR-342-3p	150	40	63	53	96	60
	mmu-miR-101a-3p	1089	52	59	25	221	57
	mmu-miR-144-5p	55	109	157	39	95	53
	mmu-miR-1981-5p	30	34	21	24	39	53
	mmu-miR-29a-3p	141	65	75	65	348	45
	mmu-miR-27a-3p	24	23	15	44	200	42
	mmu-miR-421-3p	81	65	42	45	181	42
	mmu-miR-351-5p	34	63	157	50	160	40
	mmu-miR-378c	7	4	4	30	110	40
	mmu-miR-149-5p	148	11	29	41	54	40
	mmu-miR-1964-3p	15	17	4	51	50	36
	mmu-miR-296-5p	7	16	2	46	170	35
	mmu-miR-145a-5p	20	9	17	5	49	35
	mmu-miR-340-5p	777	68	46	20	159	34
	mmu-miR-210-3p	39	44	49	42	86	34
	mmu-miR-19b-3p	80	35	50	22	205	33
	mmu-miR-23a-3p	12	55	63	56	152	33
	mmu-miR-301a-3p	52	21	25	25	124	33
	mmu-miR-1843b-3p	12	37	33	36	28	33
	mmu-miR-18a-3p	33	31	11	34	70	32
	mmu-miR-671-3p	59	23	39	29	26	31
	mmu-miR-122-5p	0	60	5	26	1	30
	mmu-miR-1843b-5p	13	63	35	23	118	26
	mmu-miR-25-5p	37	79	59	43	61	26
	mmu-miR-215-3p	10	31	69	35	189	25
	mmu-miR-1843a-5p	12	77	43	26	117	25
	mmu-miR-6243	146	110	104	60	67	25
	mmu-miR-409-3p	470	44	54	25	66	25
	mmu-miR-30b-5p	45	27	18	40	214	22
	mmu-miR-106b-5p	11	18	16	13	76	21
	mmu-miR-151-5p	576	65	57	10	102	20
	mmu-miR-15b-5p	70	72	99	44	53	20
	mmu-miR-142-3p	17	6	30	14	97	19
	mmu-miR-148b-3p	26	12	25	3	54	19
	mmu-miR-652-3p	1	17	5	44	39	19
	mmu-miR-3057-5p	15	59	40	11	33	19
	mmu-miR-574-3p	45	26	28	72	550	18
	mmu-miR-126-3p	42	28	27	28	191	17
	mmu-miR-30e-3p	136	40	75	21	100	17
	mmu-miR-541-5p	9	23	68	18	100	16
	mmu-miR-204-5p	1939	12	39	21	93	16
	mmu-miR-501-3p	3	7	0	19	25	16
	mmu-miR-1306-5p	20	15	24	11	51	14
	mmu-miR-223-3p	9	6	10	15	67	13
	mmu-miR-3074-5p	3	23	12	19	45	13
	mmu-miR-203-3p	19	18	11	13	64	12
	mmu-miR-28a-3p	5	27	18	17	44	12
	mmu-miR-99a-5p	82	17	25	15	71	11
	mmu-miR-30c-2-3p	50	50	39	6	22	11
	mmu-miR-19a-3p	11	2	11	5	38	10
	mmu-miR-21a-3p	9	3	0	10	28	10
	mmu-miR-664-5p	6	16	16	12	22	10
	mmu-miR-100-5p	221	9	15	14	82	9
	mmu-miR-141-3p	9	10	8	12	57	9
	mmu-miR-298-5p	7	7	13	13	42	9
	mmu-miR-674-3p	4	9	0	6	13	9
	mmu-miR-24-3p	17	18	4	4	85	8
	mmu-miR-872-5p	0	1	2	1	27	8
	mmu-miR-676-5p	3	12	14	14	25	8
	mmu-miR-148b-5p	8	4	4	1	19	8
	mmu-miR-361-3p	28	9	4	13	16	8
	mmu-miR-326-3p	4	8	0	9	13	8
	mmu-miR-5109	44	17	8	7	8	8
	mmu-miR-3473b	0	0	1	5	1	8
	mmu-miR-411-5p	674	2	16	5	37	7
	mmu-miR-17-3p	1	10	17	4	35	7
	mmu-miR-17-5p	2	12	10	7	31	7
	mmu-miR-15b-3p	3	4	0	8	20	7
	mmu-miR-1934-5p	10	3	1	0	13	7
	mmu-miR-219-1-3p	10	8	5	5	9	7
	mmu-miR-3473e	0	0	0	2	0	7
	mmu-miR-148a-5p	10	53	14	7	53	6
	mmu-miR-183-5p	4	4	4	0	37	6
	mmu-miR-193b-3p	1	1	6	3	34	6
	mmu-miR-181a-1-3p	187	12	16	6	29	6
	mmu-miR-1968-5p	17	24	16	5	17	6
	mmu-miR-324-3p	9	12	12	9	13	6
	mmu-miR-361-5p	22	9	2	3	11	6
	mmu-miR-30d-3p	13	5	6	1	8	6
	mmu-miR-128-1-5p	95	11	16	8	5	6
	mmu-miR-130b-5p	4	2	5	2	4	6
	mmu-miR-155-5p	5	4	8	2	3	6
	mmu-let-7e-5p	3993	10	18	18	39	5
	mmu-miR-194-5p	13	34	9	0	32	5
	mmu-miR-140-5p	1	3	6	6	24	5
	mmu-miR-339-5p	0	0	8	13	21	5
	mmu-miR-410-3p	370	8	4	4	21	5
	mmu-miR-374b-5p	22	5	12	0	21	5
	mmu-miR-345-5p	0	0	8	0	17	5
	mmu-miR-344d-3p	0	8	13	0	14	5
	mmu-miR-1947-5p	11	15	5	9	9	5
	mmu-miR-672-5p	0	0	3	3	8	5
	mmu-miR-3096b-5p	9	7	13	2	6	5
	mmu-miR-3096a-5p	6	6	4	2	4	5
	mmu-miR-133a-5p	0	0	0	0	4	5
	mmu-miR-3473d	1	0	0	4	2	5
	mmu-miR-350-5p	3	14	8	13	34	4
	mmu-miR-582-3p	0	1	7	2	29	4
	mmu-miR-125b-2-3p	0	3	12	2	28	4
	mmu-miR-125b-1-3p	43	6	9	12	23	4
	mmu-miR-31-5p	35	15	2	3	18	4
	mmu-miR-511-5p	2	0	3	3	11	4
	mmu-miR-669a-5p	0	2	0	2	9	4
	mmu-miR-669p-5p	0	2	0	2	9	4
	mmu-miR-1306-3p	8	6	0	15	8	4
	mmu-miR-27b-5p	10	0	9	3	8	4
	mmu-miR-1249-3p	0	0	0	3	7	4
	mmu-miR-132-3p	60	7	0	5	4	4
	mmu-miR-5107-3p	0	3	4	3	2	4
	mmu-miR-674-5p	5	2	0	0	2	4
	mmu-miR-467d-5p	0	7	1	0	0	4
	mmu-miR-673-3p	0	1	1	0	0	4
	mmu-miR-429-3p	8	0	2	7	54	3
	mmu-miR-381-3p	611	0	6	1	46	3
	mmu-miR-24-2-5p	1	2	0	6	41	3
	mmu-miR-497-5p	36	4	6	1	26	3
	mmu-miR-181c-3p	57	10	7	3	23	3
	mmu-miR-29c-3p	16	0	3	2	22	3
	mmu-miR-365-3p	6	8	1	10	15	3
	mmu-miR-195a-5p	49	0	3	1	14	3
	mmu-miR-145a-3p	9	0	0	0	13	3
	mmu-miR-540-3p	2	1	14	4	12	3
	mmu-miR-196a-5p	0	0	6	1	12	3
	mmu-miR-1982.1-3p	0	3	4	0	12	3
	mmu-miR-1982.2-3p	0	3	4	0	12	3
	mmu-miR-1196-5p	3	12	6	7	11	3
	mmu-miR-184-3p	2	2	9	0	10	3
	mmu-miR-339-3p	1	2	3	8	9	3
	mmu-miR-93-3p	0	11	6	9	8	3
	mmu-miR-3102-3p.2-3p	0	0	2	2	8	3
	mmu-miR-214-3p	2	3	0	2	7	3
	mmu-miR-3068-3p	0	2	0	0	5	3
	mmu-miR-1247-5p	1	3	3	1	4	3
	mmu-miR-341-3p	0	4	0	1	4	3
	mmu-miR-152-3p	0	0	0	1	4	3
	mmu-miR-425-3p	0	8	4	6	3	3
	mmu-miR-350-3p	3	1	0	0	3	3
	mmu-miR-1927	0	1	0	0	2	3
	mmu-miR-30c-1-3p	9	1	2	3	1	3
	mmu-miR-1965	0	0	0	2	1	3
	mmu-miR-7a-1-3p	6	0	0	1	0	3
	mmu-miR-5124a	0	0	0	0	0	3
	mmu-miR-199a-5p	7	1	2	2	34	2
	mmu-miR-136-3p	119	4	2	2	28	2
	mmu-miR-223-5p	0	2	10	3	26	2
	mmu-miR-300-3p	14	0	0	0	23	2
	mmu-miR-200a-3p	0	6	8	4	20	2
	mmu-miR-210-5p	0	2	13	3	11	2
	mmu-miR-5107-5p	11	4	11	12	9	2
	mmu-miR-195a-3p	25	6	1	4	9	2
	mmu-miR-16-2-3p	1	0	2	1	9	2
	mmu-miR-150-3p	6	1	0	5	6	2
	mmu-miR-615-3p	0	0	0	0	6	2
	mmu-miR-3470a	6	0	0	4	5	2
	mmu-miR-185-3p	0	0	0	5	4	2
	mmu-miR-668-3p	4	0	0	3	4	2
	mmu-miR-3061-3p	0	0	0	3	4	2
	mmu-miR-1945	0	1	8	2	4	2
	mmu-miR-335-3p	0	0	0	2	4	2
	mmu-miR-322-5p	0	0	6	0	4	2
	mmu-miR-874-3p	75	4	4	0	4	2
	mmu-miR-98-3p	3	0	0	0	4	2
	mmu-miR-3470b	0	1	4	7	3	2
	mmu-miR-222-5p	7	3	3	4	3	2
	mmu-miR-296-3p	4	0	0	0	3	2
	mmu-miR-485-5p	91	2	0	1	2	2
	mmu-miR-1247-3p	0	0	1	0	1	2
	mmu-miR-29b-3p	16	1	0	0	1	2
	mmu-miR-18a-5p	3	1	0	0	1	2
	mmu-miR-218-5p	107	0	0	0	1	2
	mmu-miR-221-5p	3	1	0	1	0	2
	mmu-miR-193b-5p	1	0	0	1	0	2
	mmu-miR-3081-3p	0	0	0	1	0	2
	mmu-miR-5105	0	7	1	0	0	2
	mmu-miR-32-5p	2	5	0	0	0	2
	mmu-miR-3098-3p	0	2	0	0	0	2
	mmu-miR-1940	0	0	0	0	0	2
	mmu-miR-194-1-3p	0	0	0	0	0	2
	mmu-miR-466f-3p	0	0	0	0	0	2
	mmu-miR-466i-3p	0	0	0	0	0	2
	mmu-miR-133b-3p	12	0	10	2	26	1
	mmu-miR-455-5p	16	0	0	1	19	1
	mmu-miR-342-5p	45	2	8	7	16	1
	mmu-miR-532-3p	7	2	2	3	13	1
	mmu-miR-702-3p	4	11	4	6	11	1
	mmu-miR-26b-3p	4	4	0	1	11	1
	mmu-miR-877-5p	39	5	3	6	9	1
	mmu-miR-1943-5p	0	0	1	4	9	1
	mmu-miR-483-3p	0	1	0	3	9	1
	mmu-miR-1970	3	0	3	0	9	1
	mmu-miR-322-3p	0	1	0	0	9	1
	mmu-miR-139-5p	26	2	1	4	6	1
	mmu-miR-134-5p	9	0	0	1	6	1
	mmu-miR-872-3p	1	0	1	3	5	1
	mmu-miR-363-3p	16	0	0	0	5	1
	mmu-miR-3058-3p	0	6	1	6	4	1
	mmu-let-7i-3p	0	0	0	4	4	1
	mmu-miR-5113	5	0	0	3	4	1
	mmu-let-7b-3p	6	0	2	0	4	1
	mmu-miR-22-5p	0	5	0	0	4	1
	mmu-miR-5132-5p	0	1	0	0	4	1
	mmu-miR-187-3p	5	0	3	1	3	1
	mmu-miR-138-5p	54	0	2	0	3	1
	mmu-miR-5128	7	0	2	0	3	1
	mmu-miR-615-5p	0	0	0	0	3	1
	mmu-miR-1981-3p	0	0	1	3	2	1
	mmu-miR-340-3p	1	1	0	3	2	1
	mmu-miR-3103-3p	2	1	4	1	2	1
	mmu-miR-485-3p	8	0	1	0	2	1
	mmu-miR-1199-5p	0	2	0	0	2	1
	mmu-miR-338-3p	347	0	0	0	2	1
	mmu-miR-1843a-3p	0	2	3	2	1	1
	mmu-miR-329-5p	0	0	0	2	1	1
	mmu-miR-331-5p	0	0	1	1	1	1
	mmu-miR-138-1-3p	60	2	0	0	1	1
	mmu-miR-592-5p	9	2	0	0	1	1
	mmu-miR-433-3p	27	0	0	0	1	1
	mmu-miR-667-3p	0	0	0	0	1	1
	mmu-miR-3969	0	0	0	3	0	1
	mmu-miR-200c-3p	0	0	3	2	0	1
	mmu-miR-1a-3p	0	0	0	2	0	1
	mmu-miR-5119	3	0	1	0	0	1
	mmu-miR-10b-3p	0	1	0	0	0	1
	mmu-miR-330-3p	10	0	0	0	0	1
	mmu-miR-369-5p	3	0	0	0	0	1
	mmu-miR-5100	2	0	0	0	0	1
	mmu-miR-187-5p	0	0	0	0	0	1
	mmu-miR-1930-5p	0	0	0	0	0	1
	mmu-miR-1934-3p	0	0	0	0	0	1
	mmu-miR-1955-5p	0	0	0	0	0	1
	mmu-miR-1966-3p	0	0	0	0	0	1
	mmu-miR-33-5p	0	0	0	0	0	1
	mmu-miR-671-5p	0	0	0	0	0	1
	mmu-miR-378d	0	0	0	0	99	0
	mmu-miR-664-3p	3	8	8	4	34	0
	mmu-miR-20a-5p	11	5	8	5	16	0
	mmu-miR-431-5p	5	0	3	3	12	0
	mmu-miR-34c-5p	34	3	2	2	12	0
	mmu-miR-23b-3p	30	6	4	7	11	0
	mmu-miR-434-5p	7	0	4	1	11	0
	mmu-miR-673-5p	0	7	4	0	10	0
	mmu-miR-1954	0	2	0	0	10	0
	mmu-miR-345-3p	0	1	3	3	9	0
	mmu-miR-301b-3p	0	2	1	0	9	0
	mmu-miR-1960	5	14	8	0	8	0
	mmu-miR-200b-3p	0	2	4	3	7	0
	mmu-miR-299a-5p	25	0	0	0	6	0
	mmu-miR-3072-3p	0	0	0	0	6	0
	mmu-miR-28a-5p	20	5	7	3	5	0
	mmu-miR-378a-5p	0	0	2	0	5	0
	mmu-miR-490-3p	10	0	2	3	4	0
	mmu-miR-3074-1-3p	0	0	0	2	4	0
	mmu-miR-224-5p	0	0	1	1	4	0
	mmu-miR-99a-3p	0	1	0	0	4	0
	mmu-miR-199b-5p	0	0	0	0	4	0
	mmu-miR-3102-3p	0	0	0	0	4	0
	mmu-miR-503-3p	0	0	0	0	4	0
	mmu-miR-129-2-3p	234	0	0	4	3	0
	mmu-miR-99b-3p	9	0	2	2	3	0
	mmu-miR-10a-3p	0	0	2	2	3	0
	mmu-miR-212-3p	4	2	0	2	3	0
	mmu-miR-1933-3p	0	0	0	1	3	0
	mmu-miR-431-3p	53	0	3	0	3	0
	mmu-miR-16-1-3p	0	0	2	0	3	0
	mmu-miR-92a-1-5p	0	0	1	0	3	0
	mmu-miR-127-5p	6	0	0	0	3	0
	mmu-miR-1983	0	0	0	0	3	0
	mmu-miR-217-5p	0	0	0	0	3	0
	mmu-miR-505-3p	0	0	0	0	3	0
	mmu-miR-653-5p	0	0	0	0	3	0
	mmu-miR-330-5p	19	1	2	4	2	0
	mmu-miR-465c-5p	0	1	1	4	2	0
	mmu-miR-708-3p	7	0	0	2	2	0
	mmu-let-7a-1-3p	0	0	0	1	2	0
	mmu-let-7c-2-3p	0	0	0	1	2	0
	mmu-miR-190b-5p	0	0	0	1	2	0
	mmu-miR-450a-5p	0	0	0	1	2	0
	mmu-miR-5134-3p	0	0	2	0	2	0
	mmu-miR-34a-5p	2	0	1	0	2	0
	mmu-miR-3082-3p	6	5	0	0	2	0
	mmu-miR-3103-5p	0	4	0	0	2	0
	mmu-miR-679-5p	0	2	0	0	2	0
	mmu-miR-470-5p	0	1	0	0	2	0
	mmu-miR-129-5p	114	0	0	0	2	0
	mmu-miR-129-1-3p	56	0	0	0	2	0
	mmu-miR-487b-3p	54	0	0	0	2	0
	mmu-miR-335-5p	8	0	0	0	2	0
	mmu-miR-132-5p	5	0	0	0	2	0
	mmu-miR-744-3p	5	0	0	0	2	0
	mmu-miR-128-2-5p	0	0	0	0	2	0
	mmu-miR-1931	0	0	0	0	2	0
	mmu-miR-1943-3p	0	0	0	0	2	0
	mmu-miR-205-3p	0	0	0	0	2	0
	mmu-miR-208b-3p	0	0	0	0	2	0
	mmu-miR-337-3p	0	0	0	0	2	0
	mmu-miR-344b-3p	0	0	0	0	2	0
	mmu-miR-450b-5p	0	0	0	0	2	0
	mmu-miR-496a-3p	0	0	0	0	2	0
	mmu-miR-543-3p	0	0	0	0	2	0
	mmu-miR-877-3p	0	0	0	0	2	0
	mmu-miR-574-5p	0	0	0	3	1	0
	mmu-miR-191-3p	0	3	0	2	1	0
	mmu-miR-196b-5p	0	0	0	2	1	0
	mmu-miR-337-5p	0	0	1	1	1	0
	mmu-miR-503-5p	0	3	0	1	1	0
	mmu-miR-331-3p	5	0	0	1	1	0
	mmu-miR-3066-5p	0	0	0	1	1	0
	mmu-miR-6240	0	0	0	1	1	0
	mmu-miR-871-3p	2	0	5	0	1	0
	mmu-miR-505-5p	0	0	4	0	1	0
	mmu-miR-1191	0	3	1	0	1	0
	mmu-miR-33-3p	0	3	0	0	1	0
	mmu-miR-1948-3p	0	2	0	0	1	0
	mmu-miR-3112-5p	0	2	0	0	1	0
	mmu-miR-500-3p	0	1	0	0	1	0
	mmu-miR-338-5p	38	0	0	0	1	0
	mmu-miR-504-5p	6	0	0	0	1	0
	mmu-let-7e-3p	3	0	0	0	1	0
	mmu-miR-147-3p	2	0	0	0	1	0
	mmu-miR-708-5p	2	0	0	0	1	0
	mmu-let-7g-3p	0	0	0	0	1	0
	mmu-miR-139-3p	0	0	0	0	1	0
	mmu-miR-141-5p	0	0	0	0	1	0
	mmu-miR-143-5p	0	0	0	0	1	0
	mmu-miR-154-5p	0	0	0	0	1	0
	mmu-miR-188-5p	0	0	0	0	1	0
	mmu-miR-200b-5p	0	0	0	0	1	0
	mmu-miR-214-5p	0	0	0	0	1	0
	mmu-miR-216a-5p	0	0	0	0	1	0
	mmu-miR-3061-5p	0	0	0	0	1	0
	mmu-miR-3084-3p	0	0	0	0	1	0
	mmu-miR-3086-5p	0	0	0	0	1	0
	mmu-miR-3102-5p.2-5p	0	0	0	0	1	0
	mmu-miR-329-3p	0	0	0	0	1	0
	mmu-miR-3572-3p	0	0	0	0	1	0
	mmu-miR-382-5p	0	0	0	0	1	0
	mmu-miR-466a-3p	0	0	0	0	1	0
	mmu-miR-466b-3p	0	0	0	0	1	0
	mmu-miR-466c-3p	0	0	0	0	1	0
	mmu-miR-466e-3p	0	0	0	0	1	0
	mmu-miR-466p-3p	0	0	0	0	1	0
	mmu-miR-467a-5p	0	0	0	0	1	0
	mmu-miR-467b-5p	0	0	0	0	1	0
	mmu-miR-499-5p	0	0	0	0	1	0
	mmu-miR-511-3p	0	0	0	0	1	0
	mmu-miR-5121	0	0	0	0	1	0
	mmu-miR-5123	0	0	0	0	1	0
	mmu-miR-542-3p	0	0	0	0	1	0
	mmu-miR-5620-5p	0	0	0	0	1	0
	mmu-miR-598-3p	0	0	0	0	1	0
	mmu-miR-6418-3p	0	0	0	0	1	0
	mmu-miR-6537-3p	0	0	0	0	1	0
	mmu-miR-670-3p	0	0	0	0	1	0
	mmu-miR-703	0	0	0	0	1	0
	mmu-miR-764-5p	0	0	0	0	1	0
	mmu-miR-871-5p	0	0	0	0	1	0
	mmu-miR-15a-3p	0	0	0	7	0	0
	mmu-miR-5134-5p	0	0	0	4	0	0
	mmu-miR-211-5p	4	0	0	3	0	0
	mmu-miR-3066-3p	0	0	0	3	0	0
	mmu-miR-136-5p	32	0	1	2	0	0
	mmu-miR-324-5p	1	0	1	2	0	0
	mmu-miR-27a-5p	3	0	0	2	0	0
	mmu-miR-378b	0	0	0	2	0	0
	mmu-miR-18b-3p	0	0	0	1	0	0
	mmu-miR-1951	0	0	0	1	0	0
	mmu-miR-206-3p	0	0	0	1	0	0
	mmu-miR-3077-3p	0	0	0	1	0	0
	mmu-miR-341-5p	0	0	0	1	0	0
	mmu-miR-6538	0	0	0	1	0	0
	mmu-miR-666-5p	0	0	6	0	0	0
	mmu-let-7f-1-3p	0	0	3	0	0	0
	mmu-miR-1839-3p	0	0	3	0	0	0
	mmu-miR-767	3	0	2	0	0	0
	mmu-miR-208a-3p	0	0	2	0	0	0
	mmu-miR-362-5p	0	0	2	0	0	0
	mmu-miR-677-5p	0	0	2	0	0	0
	mmu-let-7j	1	2	1	0	0	0
	mmu-miR-700-5p	3	1	1	0	0	0
	mmu-miR-9-5p	7683	0	1	0	0	0
	mmu-miR-760-3p	1	0	1	0	0	0
	mmu-miR-200a-5p	0	0	1	0	0	0
	mmu-miR-542-5p	0	0	1	0	0	0
	mmu-miR-194-2-3p	0	8	0	0	0	0
	mmu-miR-122-3p	0	7	0	0	0	0
	mmu-miR-7a-2-3p	0	6	0	0	0	0
	mmu-miR-467c-5p	0	5	0	0	0	0
	mmu-miR-101a-5p	4	3	0	0	0	0
	mmu-miR-125a-3p	1	3	0	0	0	0
	mmu-miR-3064-5p	0	3	0	0	0	0
	mmu-let-7c-1-3p	0	2	0	0	0	0
	mmu-miR-208a-5p	0	2	0	0	0	0
	mmu-miR-3058-5p	0	2	0	0	0	0
	mmu-miR-106a-5p	0	1	0	0	0	0
	mmu-miR-1968-3p	0	1	0	0	0	0
	mmu-miR-449a-5p	0	1	0	0	0	0
	mmu-miR-669a-3p	0	1	0	0	0	0
	mmu-miR-669o-3p	0	1	0	0	0	0
	mmu-miR-219-2-3p	467	0	0	0	0	0
	mmu-miR-124-3p	182	0	0	0	0	0
	mmu-miR-654-3p	83	0	0	0	0	0
	mmu-miR-323-3p	63	0	0	0	0	0
	mmu-miR-153-3p	45	0	0	0	0	0
	mmu-miR-9-3p	37	0	0	0	0	0
	mmu-miR-370-3p	15	0	0	0	0	0
	mmu-miR-874-5p	14	0	0	0	0	0
	mmu-miR-124-5p	9	0	0	0	0	0
	mmu-miR-1298-5p	8	0	0	0	0	0
	mmu-miR-323-5p	7	0	0	0	0	0
	mmu-miR-190a-5p	5	0	0	0	0	0
	mmu-miR-219-5p	5	0	0	0	0	0
	mmu-miR-590-3p	5	0	0	0	0	0
	mmu-miR-873a-5p	5	0	0	0	0	0
	mmu-miR-1224-5p	4	0	0	0	0	0
	mmu-miR-376a-5p	4	0	0	0	0	0
	mmu-miR-494-3p	4	0	0	0	0	0
	mmu-miR-135b-5p	3	0	0	0	0	0
	mmu-miR-212-5p	3	0	0	0	0	0
	mmu-miR-3059-5p	2	0	0	0	0	0
	mmu-miR-3060-3p	2	0	0	0	0	0
	mmu-miR-369-3p	2	0	0	0	0	0
	mmu-miR-5129-3p	2	0	0	0	0	0
	mmu-miR-101c	1	0	0	0	0	0
	mmu-miR-758-3p	1	0	0	0	0	0
	mmu-let-7a-2-3p	0	0	0	0	0	0
	mmu-let-7f-2-3p	0	0	0	0	0	0
	mmu-let-7k	0	0	0	0	0	0
	mmu-miR-100-3p	0	0	0	0	0	0
	mmu-miR-101b-5p	0	0	0	0	0	0
	mmu-miR-103-1-5p	0	0	0	0	0	0
	mmu-miR-103-2-5p	0	0	0	0	0	0
	mmu-miR-105	0	0	0	0	0	0
	mmu-miR-106a-3p	0	0	0	0	0	0
	mmu-miR-107-5p	0	0	0	0	0	0
	mmu-miR-1186a	0	0	0	0	0	0
	mmu-miR-1186b	0	0	0	0	0	0
	mmu-miR-1187	0	0	0	0	0	0
	mmu-miR-1188-3p	0	0	0	0	0	0
	mmu-miR-1188-5p	0	0	0	0	0	0
	mmu-miR-1190	0	0	0	0	0	0
	mmu-miR-1192	0	0	0	0	0	0
	mmu-miR-1193-3p	0	0	0	0	0	0
	mmu-miR-1193-5p	0	0	0	0	0	0
	mmu-miR-1194	0	0	0	0	0	0
	mmu-miR-1195	0	0	0	0	0	0
	mmu-miR-1196-3p	0	0	0	0	0	0
	mmu-miR-1197-3p	0	0	0	0	0	0
	mmu-miR-1197-5p	0	0	0	0	0	0
	mmu-miR-1198-3p	0	0	0	0	0	0
	mmu-miR-1199-3p	0	0	0	0	0	0
	mmu-miR-1224-3p	0	0	0	0	0	0
	mmu-miR-1231-3p	0	0	0	0	0	0
	mmu-miR-1231-5p	0	0	0	0	0	0
	mmu-miR-1249-5p	0	0	0	0	0	0
	mmu-miR-1251-3p	0	0	0	0	0	0
	mmu-miR-1251-5p	0	0	0	0	0	0
	mmu-miR-1264-3p	0	0	0	0	0	0
	mmu-miR-1264-5p	0	0	0	0	0	0
	mmu-miR-1298-3p	0	0	0	0	0	0
	mmu-miR-130a-5p	0	0	0	0	0	0
	mmu-miR-130c	0	0	0	0	0	0
	mmu-miR-133b-5p	0	0	0	0	0	0
	mmu-miR-133c	0	0	0	0	0	0
	mmu-miR-134-3p	0	0	0	0	0	0
	mmu-miR-135a-1-3p	0	0	0	0	0	0
	mmu-miR-135a-2-3p	0	0	0	0	0	0
	mmu-miR-135a-5p	0	0	0	0	0	0
	mmu-miR-135b-3p	0	0	0	0	0	0
	mmu-miR-137-3p	0	0	0	0	0	0
	mmu-miR-137-5p	0	0	0	0	0	0
	mmu-miR-138-2-3p	0	0	0	0	0	0
	mmu-miR-145b	0	0	0	0	0	0
	mmu-miR-146a-3p	0	0	0	0	0	0
	mmu-miR-146b-3p	0	0	0	0	0	0
	mmu-miR-147-5p	0	0	0	0	0	0
	mmu-miR-149-3p	0	0	0	0	0	0
	mmu-miR-152-5p	0	0	0	0	0	0
	mmu-miR-153-5p	0	0	0	0	0	0
	mmu-miR-154-3p	0	0	0	0	0	0
	mmu-miR-155-3p	0	0	0	0	0	0
	mmu-miR-181b-1-3p	0	0	0	0	0	0
	mmu-miR-181b-2-3p	0	0	0	0	0	0
	mmu-miR-181d-3p	0	0	0	0	0	0
	mmu-miR-182-3p	0	0	0	0	0	0
	mmu-miR-183-3p	0	0	0	0	0	0
	mmu-miR-184-5p	0	0	0	0	0	0
	mmu-miR-185-5p	0	0	0	0	0	0
	mmu-miR-186-3p	0	0	0	0	0	0
	mmu-miR-188-3p	0	0	0	0	0	0
	mmu-miR-1892	0	0	0	0	0	0
	mmu-miR-1893	0	0	0	0	0	0
	mmu-miR-1894-3p	0	0	0	0	0	0
	mmu-miR-1894-5p	0	0	0	0	0	0
	mmu-miR-1895	0	0	0	0	0	0
	mmu-miR-1896	0	0	0	0	0	0
	mmu-miR-1897-3p	0	0	0	0	0	0
	mmu-miR-1897-5p	0	0	0	0	0	0
	mmu-miR-1898	0	0	0	0	0	0
	mmu-miR-1899	0	0	0	0	0	0
	mmu-miR-18b-5p	0	0	0	0	0	0
	mmu-miR-1900	0	0	0	0	0	0
	mmu-miR-1901	0	0	0	0	0	0
	mmu-miR-1902	0	0	0	0	0	0
	mmu-miR-1903	0	0	0	0	0	0
	mmu-miR-1904	0	0	0	0	0	0
	mmu-miR-1905	0	0	0	0	0	0
	mmu-miR-1906	0	0	0	0	0	0
	mmu-miR-1907	0	0	0	0	0	0
	mmu-miR-190a-3p	0	0	0	0	0	0
	mmu-miR-190b-3p	0	0	0	0	0	0
	mmu-miR-1912-3p	0	0	0	0	0	0
	mmu-miR-1912-5p	0	0	0	0	0	0
	mmu-miR-192-3p	0	0	0	0	0	0
	mmu-miR-1928	0	0	0	0	0	0
	mmu-miR-1929-3p	0	0	0	0	0	0
	mmu-miR-1929-5p	0	0	0	0	0	0
	mmu-miR-1930-3p	0	0	0	0	0	0
	mmu-miR-1932	0	0	0	0	0	0
	mmu-miR-1933-5p	0	0	0	0	0	0
	mmu-miR-1935	0	0	0	0	0	0
	mmu-miR-1936	0	0	0	0	0	0
	mmu-miR-1938	0	0	0	0	0	0
	mmu-miR-193a-3p	0	0	0	0	0	0
	mmu-miR-193a-5p	0	0	0	0	0	0
	mmu-miR-1941-3p	0	0	0	0	0	0
	mmu-miR-1941-5p	0	0	0	0	0	0
	mmu-miR-1942	0	0	0	0	0	0
	mmu-miR-1946a	0	0	0	0	0	0
	mmu-miR-1946b	0	0	0	0	0	0
	mmu-miR-1947-3p	0	0	0	0	0	0
	mmu-miR-1948-5p	0	0	0	0	0	0
	mmu-miR-1949	0	0	0	0	0	0
	mmu-miR-1950	0	0	0	0	0	0
	mmu-miR-1952	0	0	0	0	0	0
	mmu-miR-1953	0	0	0	0	0	0
	mmu-miR-1955-3p	0	0	0	0	0	0
	mmu-miR-1956	0	0	0	0	0	0
	mmu-miR-1957a	0	0	0	0	0	0
	mmu-miR-1957b	0	0	0	0	0	0
	mmu-miR-1958	0	0	0	0	0	0
	mmu-miR-195b	0	0	0	0	0	0
	mmu-miR-1961	0	0	0	0	0	0
	mmu-miR-1962	0	0	0	0	0	0
	mmu-miR-1963	0	0	0	0	0	0
	mmu-miR-1964-5p	0	0	0	0	0	0
	mmu-miR-1966-5p	0	0	0	0	0	0
	mmu-miR-1967	0	0	0	0	0	0
	mmu-miR-1969	0	0	0	0	0	0
	mmu-miR-196a-1-3p	0	0	0	0	0	0
	mmu-miR-196a-2-3p	0	0	0	0	0	0
	mmu-miR-196b-3p	0	0	0	0	0	0
	mmu-miR-1971	0	0	0	0	0	0
	mmu-miR-1982-5p	0	0	0	0	0	0
	mmu-miR-19a-5p	0	0	0	0	0	0
	mmu-miR-19b-1-5p	0	0	0	0	0	0
	mmu-miR-19b-2-5p	0	0	0	0	0	0
	mmu-miR-1a-1-5p	0	0	0	0	0	0
	mmu-miR-1a-2-5p	0	0	0	0	0	0
	mmu-miR-1b-3p	0	0	0	0	0	0
	mmu-miR-1b-5p	0	0	0	0	0	0
	mmu-miR-200c-5p	0	0	0	0	0	0
	mmu-miR-201-3p	0	0	0	0	0	0
	mmu-miR-201-5p	0	0	0	0	0	0
	mmu-miR-202-3p	0	0	0	0	0	0
	mmu-miR-202-5p	0	0	0	0	0	0
	mmu-miR-203-5p	0	0	0	0	0	0
	mmu-miR-204-3p	0	0	0	0	0	0
	mmu-miR-206-5p	0	0	0	0	0	0
	mmu-miR-207	0	0	0	0	0	0
	mmu-miR-208b-5p	0	0	0	0	0	0
	mmu-miR-20a-3p	0	0	0	0	0	0
	mmu-miR-20b-3p	0	0	0	0	0	0
	mmu-miR-20b-5p	0	0	0	0	0	0
	mmu-miR-211-3p	0	0	0	0	0	0
	mmu-miR-2136	0	0	0	0	0	0
	mmu-miR-2137	0	0	0	0	0	0
	mmu-miR-2139	0	0	0	0	0	0
	mmu-miR-216a-3p	0	0	0	0	0	0
	mmu-miR-216b-3p	0	0	0	0	0	0
	mmu-miR-216b-5p	0	0	0	0	0	0
	mmu-miR-217-3p	0	0	0	0	0	0
	mmu-miR-218-1-3p	0	0	0	0	0	0
	mmu-miR-218-2-3p	0	0	0	0	0	0
	mmu-miR-2183	0	0	0	0	0	0
	mmu-miR-21b	0	0	0	0	0	0
	mmu-miR-21c	0	0	0	0	0	0
	mmu-miR-224-3p	0	0	0	0	0	0
	mmu-miR-23a-5p	0	0	0	0	0	0
	mmu-miR-23b-5p	0	0	0	0	0	0
	mmu-miR-24-1-5p	0	0	0	0	0	0
	mmu-miR-26a-1-3p	0	0	0	0	0	0
	mmu-miR-26a-2-3p	0	0	0	0	0	0
	mmu-miR-2861	0	0	0	0	0	0
	mmu-miR-28b	0	0	0	0	0	0
	mmu-miR-28c	0	0	0	0	0	0
	mmu-miR-290-3p	0	0	0	0	0	0
	mmu-miR-290-5p	0	0	0	0	0	0
	mmu-miR-291a-3p	0	0	0	0	0	0
	mmu-miR-291a-5p	0	0	0	0	0	0
	mmu-miR-291b-3p	0	0	0	0	0	0
	mmu-miR-291b-5p	0	0	0	0	0	0
	mmu-miR-292-3p	0	0	0	0	0	0
	mmu-miR-292-5p	0	0	0	0	0	0
	mmu-miR-293-3p	0	0	0	0	0	0
	mmu-miR-293-5p	0	0	0	0	0	0
	mmu-miR-294-3p	0	0	0	0	0	0
	mmu-miR-294-5p	0	0	0	0	0	0
	mmu-miR-295-3p	0	0	0	0	0	0
	mmu-miR-295-5p	0	0	0	0	0	0
	mmu-miR-297a-3p	0	0	0	0	0	0
	mmu-miR-297a-5p	0	0	0	0	0	0
	mmu-miR-297b-3p	0	0	0	0	0	0
	mmu-miR-297b-5p	0	0	0	0	0	0
	mmu-miR-297c-3p	0	0	0	0	0	0
	mmu-miR-297c-5p	0	0	0	0	0	0
	mmu-miR-298-3p	0	0	0	0	0	0
	mmu-miR-299a-3p	0	0	0	0	0	0
	mmu-miR-299b-3p	0	0	0	0	0	0
	mmu-miR-299b-5p	0	0	0	0	0	0
	mmu-miR-29a-5p	0	0	0	0	0	0
	mmu-miR-29b-1-5p	0	0	0	0	0	0
	mmu-miR-29b-2-5p	0	0	0	0	0	0
	mmu-miR-29c-5p	0	0	0	0	0	0
	mmu-miR-300-5p	0	0	0	0	0	0
	mmu-miR-301a-5p	0	0	0	0	0	0
	mmu-miR-301b-5p	0	0	0	0	0	0
	mmu-miR-302a-3p	0	0	0	0	0	0
	mmu-miR-302a-5p	0	0	0	0	0	0
	mmu-miR-302b-3p	0	0	0	0	0	0
	mmu-miR-302b-5p	0	0	0	0	0	0
	mmu-miR-302c-3p	0	0	0	0	0	0
	mmu-miR-302c-5p	0	0	0	0	0	0
	mmu-miR-302d-3p	0	0	0	0	0	0
	mmu-miR-302d-5p	0	0	0	0	0	0
	mmu-miR-3057-3p	0	0	0	0	0	0
	mmu-miR-3059-3p	0	0	0	0	0	0
	mmu-miR-3060-5p	0	0	0	0	0	0
	mmu-miR-3062-3p	0	0	0	0	0	0
	mmu-miR-3062-5p	0	0	0	0	0	0
	mmu-miR-3063-3p	0	0	0	0	0	0
	mmu-miR-3063-5p	0	0	0	0	0	0
	mmu-miR-3064-3p	0	0	0	0	0	0
	mmu-miR-3065-3p	0	0	0	0	0	0
	mmu-miR-3065-5p	0	0	0	0	0	0
	mmu-miR-3067-3p	0	0	0	0	0	0
	mmu-miR-3067-5p	0	0	0	0	0	0
	mmu-miR-3068-5p	0	0	0	0	0	0
	mmu-miR-3069-3p	0	0	0	0	0	0
	mmu-miR-3069-5p	0	0	0	0	0	0
	mmu-miR-3070a-3p	0	0	0	0	0	0
	mmu-miR-3070a-5p	0	0	0	0	0	0
	mmu-miR-3070b-3p	0	0	0	0	0	0
	mmu-miR-3070b-5p	0	0	0	0	0	0
	mmu-miR-3071-3p	0	0	0	0	0	0
	mmu-miR-3071-5p	0	0	0	0	0	0
	mmu-miR-3072-5p	0	0	0	0	0	0
	mmu-miR-3073a-3p	0	0	0	0	0	0
	mmu-miR-3073a-5p	0	0	0	0	0	0
	mmu-miR-3073b-3p	0	0	0	0	0	0
	mmu-miR-3073b-5p	0	0	0	0	0	0
	mmu-miR-3074-2-3p	0	0	0	0	0	0
	mmu-miR-3075-3p	0	0	0	0	0	0
	mmu-miR-3075-5p	0	0	0	0	0	0
	mmu-miR-3076-3p	0	0	0	0	0	0
	mmu-miR-3076-5p	0	0	0	0	0	0
	mmu-miR-3077-5p	0	0	0	0	0	0
	mmu-miR-3078-3p	0	0	0	0	0	0
	mmu-miR-3078-5p	0	0	0	0	0	0
	mmu-miR-3079-3p	0	0	0	0	0	0
	mmu-miR-3079-5p	0	0	0	0	0	0
	mmu-miR-3080-3p	0	0	0	0	0	0
	mmu-miR-3080-5p	0	0	0	0	0	0
	mmu-miR-3081-5p	0	0	0	0	0	0
	mmu-miR-3082-5p	0	0	0	0	0	0
	mmu-miR-3083-3p	0	0	0	0	0	0
	mmu-miR-3083-5p	0	0	0	0	0	0
	mmu-miR-3084-5p	0	0	0	0	0	0
	mmu-miR-3085-3p	0	0	0	0	0	0
	mmu-miR-3085-5p	0	0	0	0	0	0
	mmu-miR-3086-3p	0	0	0	0	0	0
	mmu-miR-3087-3p	0	0	0	0	0	0
	mmu-miR-3087-5p	0	0	0	0	0	0
	mmu-miR-3088-3p	0	0	0	0	0	0
	mmu-miR-3088-5p	0	0	0	0	0	0
	mmu-miR-3089-3p	0	0	0	0	0	0
	mmu-miR-3089-5p	0	0	0	0	0	0
	mmu-miR-3090-3p	0	0	0	0	0	0
	mmu-miR-3090-5p	0	0	0	0	0	0
	mmu-miR-3091-3p	0	0	0	0	0	0
	mmu-miR-3091-5p	0	0	0	0	0	0
	mmu-miR-3092-3p	0	0	0	0	0	0
	mmu-miR-3092-5p	0	0	0	0	0	0
	mmu-miR-3093-3p	0	0	0	0	0	0
	mmu-miR-3093-5p	0	0	0	0	0	0
	mmu-miR-3094-3p	0	0	0	0	0	0
	mmu-miR-3094-5p	0	0	0	0	0	0
	mmu-miR-3095-3p	0	0	0	0	0	0
	mmu-miR-3095-5p	0	0	0	0	0	0
	mmu-miR-3096a-3p	0	0	0	0	0	0
	mmu-miR-3096b-3p	0	0	0	0	0	0
	mmu-miR-3097-3p	0	0	0	0	0	0
	mmu-miR-3097-5p	0	0	0	0	0	0
	mmu-miR-3098-5p	0	0	0	0	0	0
	mmu-miR-3099-3p	0	0	0	0	0	0
	mmu-miR-3099-5p	0	0	0	0	0	0
	mmu-miR-30b-3p	0	0	0	0	0	0
	mmu-miR-30f	0	0	0	0	0	0
	mmu-miR-3100-3p	0	0	0	0	0	0
	mmu-miR-3100-5p	0	0	0	0	0	0
	mmu-miR-3101-3p	0	0	0	0	0	0
	mmu-miR-3101-5p	0	0	0	0	0	0
	mmu-miR-3102-5p	0	0	0	0	0	0
	mmu-miR-3104-3p	0	0	0	0	0	0
	mmu-miR-3104-5p	0	0	0	0	0	0
	mmu-miR-3105-3p	0	0	0	0	0	0
	mmu-miR-3105-5p	0	0	0	0	0	0
	mmu-miR-3106-3p	0	0	0	0	0	0
	mmu-miR-3106-5p	0	0	0	0	0	0
	mmu-miR-3108-3p	0	0	0	0	0	0
	mmu-miR-3108-5p	0	0	0	0	0	0
	mmu-miR-3109-3p	0	0	0	0	0	0
	mmu-miR-3109-5p	0	0	0	0	0	0
	mmu-miR-3110-3p	0	0	0	0	0	0
	mmu-miR-3110-5p	0	0	0	0	0	0
	mmu-miR-3112-3p	0	0	0	0	0	0
	mmu-miR-3113-3p	0	0	0	0	0	0
	mmu-miR-3113-5p	0	0	0	0	0	0
	mmu-miR-31-3p	0	0	0	0	0	0
	mmu-miR-320-5p	0	0	0	0	0	0
	mmu-miR-32-3p	0	0	0	0	0	0
	mmu-miR-325-3p	0	0	0	0	0	0
	mmu-miR-325-5p	0	0	0	0	0	0
	mmu-miR-326-5p	0	0	0	0	0	0
	mmu-miR-327	0	0	0	0	0	0
	mmu-miR-328-5p	0	0	0	0	0	0
	mmu-miR-343	0	0	0	0	0	0
	mmu-miR-344-3p	0	0	0	0	0	0
	mmu-miR-344-5p	0	0	0	0	0	0
	mmu-miR-344b-5p	0	0	0	0	0	0
	mmu-miR-344c-3p	0	0	0	0	0	0
	mmu-miR-344c-5p	0	0	0	0	0	0
	mmu-miR-344d-1-5p	0	0	0	0	0	0
	mmu-miR-344d-2-5p	0	0	0	0	0	0
	mmu-miR-344d-3-5p	0	0	0	0	0	0
	mmu-miR-344e-3p	0	0	0	0	0	0
	mmu-miR-344e-5p	0	0	0	0	0	0
	mmu-miR-344f-3p	0	0	0	0	0	0
	mmu-miR-344f-5p	0	0	0	0	0	0
	mmu-miR-344g-3p	0	0	0	0	0	0
	mmu-miR-344g-5p	0	0	0	0	0	0
	mmu-miR-344h-3p	0	0	0	0	0	0
	mmu-miR-344h-5p	0	0	0	0	0	0
	mmu-miR-344i	0	0	0	0	0	0
	mmu-miR-346-3p	0	0	0	0	0	0
	mmu-miR-346-5p	0	0	0	0	0	0
	mmu-miR-3471	0	0	0	0	0	0
	mmu-miR-3472	0	0	0	0	0	0
	mmu-miR-3473a	0	0	0	0	0	0
	mmu-miR-3473c	0	0	0	0	0	0
	mmu-miR-3474	0	0	0	0	0	0
	mmu-miR-3475	0	0	0	0	0	0
	mmu-miR-34a-3p	0	0	0	0	0	0
	mmu-miR-34b-3p	0	0	0	0	0	0
	mmu-miR-34b-5p	0	0	0	0	0	0
	mmu-miR-34c-3p	0	0	0	0	0	0
	mmu-miR-351-3p	0	0	0	0	0	0
	mmu-miR-3544-3p	0	0	0	0	0	0
	mmu-miR-3544-5p	0	0	0	0	0	0
	mmu-miR-3572-5p	0	0	0	0	0	0
	mmu-miR-362-3p	0	0	0	0	0	0
	mmu-miR-363-5p	0	0	0	0	0	0
	mmu-miR-365-1-5p	0	0	0	0	0	0
	mmu-miR-365-2-5p	0	0	0	0	0	0
	mmu-miR-367-3p	0	0	0	0	0	0
	mmu-miR-367-5p	0	0	0	0	0	0
	mmu-miR-370-5p	0	0	0	0	0	0
	mmu-miR-374b-3p	0	0	0	0	0	0
	mmu-miR-374c-3p	0	0	0	0	0	0
	mmu-miR-374c-5p	0	0	0	0	0	0
	mmu-miR-375-5p	0	0	0	0	0	0
	mmu-miR-376a-3p	0	0	0	0	0	0
	mmu-miR-376b-3p	0	0	0	0	0	0
	mmu-miR-376b-5p	0	0	0	0	0	0
	mmu-miR-376c-3p	0	0	0	0	0	0
	mmu-miR-376c-5p	0	0	0	0	0	0
	mmu-miR-377-3p	0	0	0	0	0	0
	mmu-miR-377-5p	0	0	0	0	0	0
	mmu-miR-379-3p	0	0	0	0	0	0
	mmu-miR-379-5p	0	0	0	0	0	0
	mmu-miR-380-3p	0	0	0	0	0	0
	mmu-miR-380-5p	0	0	0	0	0	0
	mmu-miR-381-5p	0	0	0	0	0	0
	mmu-miR-382-3p	0	0	0	0	0	0
	mmu-miR-383-3p	0	0	0	0	0	0
	mmu-miR-383-5p	0	0	0	0	0	0
	mmu-miR-384-3p	0	0	0	0	0	0
	mmu-miR-384-5p	0	0	0	0	0	0
	mmu-miR-3960	0	0	0	0	0	0
	mmu-miR-3961	0	0	0	0	0	0
	mmu-miR-3962	0	0	0	0	0	0
	mmu-miR-3963	0	0	0	0	0	0
	mmu-miR-3964	0	0	0	0	0	0
	mmu-miR-3965	0	0	0	0	0	0
	mmu-miR-3966	0	0	0	0	0	0
	mmu-miR-3967	0	0	0	0	0	0
	mmu-miR-3968	0	0	0	0	0	0
	mmu-miR-3970	0	0	0	0	0	0
	mmu-miR-3971	0	0	0	0	0	0
	mmu-miR-409-5p	0	0	0	0	0	0
	mmu-miR-410-5p	0	0	0	0	0	0
	mmu-miR-411-3p	0	0	0	0	0	0
	mmu-miR-412-3p	0	0	0	0	0	0
	mmu-miR-412-5p	0	0	0	0	0	0
	mmu-miR-421-5p	0	0	0	0	0	0
	mmu-miR-429-5p	0	0	0	0	0	0
	mmu-miR-432	0	0	0	0	0	0
	mmu-miR-433-5p	0	0	0	0	0	0
	mmu-miR-448-3p	0	0	0	0	0	0
	mmu-miR-448-5p	0	0	0	0	0	0
	mmu-miR-449a-3p	0	0	0	0	0	0
	mmu-miR-449b	0	0	0	0	0	0
	mmu-miR-449c-3p	0	0	0	0	0	0
	mmu-miR-449c-5p	0	0	0	0	0	0
	mmu-miR-450a-1-3p	0	0	0	0	0	0
	mmu-miR-450a-2-3p	0	0	0	0	0	0
	mmu-miR-450b-3p	0	0	0	0	0	0
	mmu-miR-451b	0	0	0	0	0	0
	mmu-miR-452-3p	0	0	0	0	0	0
	mmu-miR-452-5p	0	0	0	0	0	0
	mmu-miR-453	0	0	0	0	0	0
	mmu-miR-455-3p	0	0	0	0	0	0
	mmu-miR-463-3p	0	0	0	0	0	0
	mmu-miR-463-5p	0	0	0	0	0	0
	mmu-miR-465a-3p	0	0	0	0	0	0
	mmu-miR-465a-5p	0	0	0	0	0	0
	mmu-miR-465b-3p	0	0	0	0	0	0
	mmu-miR-465b-5p	0	0	0	0	0	0
	mmu-miR-465c-3p	0	0	0	0	0	0
	mmu-miR-466a-5p	0	0	0	0	0	0
	mmu-miR-466b-5p	0	0	0	0	0	0
	mmu-miR-466c-5p	0	0	0	0	0	0
	mmu-miR-466d-3p	0	0	0	0	0	0
	mmu-miR-466d-5p	0	0	0	0	0	0
	mmu-miR-466e-5p	0	0	0	0	0	0
	mmu-miR-466f	0	0	0	0	0	0
	mmu-miR-466f-5p	0	0	0	0	0	0
	mmu-miR-466g	0	0	0	0	0	0
	mmu-miR-466h-3p	0	0	0	0	0	0
	mmu-miR-466h-5p	0	0	0	0	0	0
	mmu-miR-466i-5p	0	0	0	0	0	0
	mmu-miR-466j	0	0	0	0	0	0
	mmu-miR-466k	0	0	0	0	0	0
	mmu-miR-466l-3p	0	0	0	0	0	0
	mmu-miR-466l-5p	0	0	0	0	0	0
	mmu-miR-466m-3p	0	0	0	0	0	0
	mmu-miR-466m-5p	0	0	0	0	0	0
	mmu-miR-466n-3p	0	0	0	0	0	0
	mmu-miR-466n-5p	0	0	0	0	0	0
	mmu-miR-466o-3p	0	0	0	0	0	0
	mmu-miR-466o-5p	0	0	0	0	0	0
	mmu-miR-466p-5p	0	0	0	0	0	0
	mmu-miR-466q	0	0	0	0	0	0
	mmu-miR-467a-3p	0	0	0	0	0	0
	mmu-miR-467b-3p	0	0	0	0	0	0
	mmu-miR-467c-3p	0	0	0	0	0	0
	mmu-miR-467d-3p	0	0	0	0	0	0
	mmu-miR-467e-3p	0	0	0	0	0	0
	mmu-miR-467e-5p	0	0	0	0	0	0
	mmu-miR-467f	0	0	0	0	0	0
	mmu-miR-467g	0	0	0	0	0	0
	mmu-miR-467h	0	0	0	0	0	0
	mmu-miR-468-3p	0	0	0	0	0	0
	mmu-miR-468-5p	0	0	0	0	0	0
	mmu-miR-470-3p	0	0	0	0	0	0
	mmu-miR-471-3p	0	0	0	0	0	0
	mmu-miR-471-5p	0	0	0	0	0	0
	mmu-miR-483-5p	0	0	0	0	0	0
	mmu-miR-487b-5p	0	0	0	0	0	0
	mmu-miR-488-3p	0	0	0	0	0	0
	mmu-miR-488-5p	0	0	0	0	0	0
	mmu-miR-489-3p	0	0	0	0	0	0
	mmu-miR-489-5p	0	0	0	0	0	0
	mmu-miR-490-5p	0	0	0	0	0	0
	mmu-miR-491-3p	0	0	0	0	0	0
	mmu-miR-491-5p	0	0	0	0	0	0
	mmu-miR-493-3p	0	0	0	0	0	0
	mmu-miR-493-5p	0	0	0	0	0	0
	mmu-miR-494-5p	0	0	0	0	0	0
	mmu-miR-495-3p	0	0	0	0	0	0
	mmu-miR-495-5p	0	0	0	0	0	0
	mmu-miR-496a-5p	0	0	0	0	0	0
	mmu-miR-496b	0	0	0	0	0	0
	mmu-miR-497-3p	0	0	0	0	0	0
	mmu-miR-499-3p	0	0	0	0	0	0
	mmu-miR-500-5p	0	0	0	0	0	0
	mmu-miR-501-5p	0	0	0	0	0	0
	mmu-miR-504-3p	0	0	0	0	0	0
	mmu-miR-5046	0	0	0	0	0	0
	mmu-miR-509-3p	0	0	0	0	0	0
	mmu-miR-509-5p	0	0	0	0	0	0
	mmu-miR-5097	0	0	0	0	0	0
	mmu-miR-5098	0	0	0	0	0	0
	mmu-miR-5099	0	0	0	0	0	0
	mmu-miR-5101	0	0	0	0	0	0
	mmu-miR-5103	0	0	0	0	0	0
	mmu-miR-5104	0	0	0	0	0	0
	mmu-miR-5106	0	0	0	0	0	0
	mmu-miR-5108	0	0	0	0	0	0
	mmu-miR-5110	0	0	0	0	0	0
	mmu-miR-5112	0	0	0	0	0	0
	mmu-miR-5114	0	0	0	0	0	0
	mmu-miR-5115	0	0	0	0	0	0
	mmu-miR-5116	0	0	0	0	0	0
	mmu-miR-5117-3p	0	0	0	0	0	0
	mmu-miR-5117-5p	0	0	0	0	0	0
	mmu-miR-5118	0	0	0	0	0	0
	mmu-miR-5120	0	0	0	0	0	0
	mmu-miR-5122	0	0	0	0	0	0
	mmu-miR-5124b	0	0	0	0	0	0
	mmu-miR-5125	0	0	0	0	0	0
	mmu-miR-5126	0	0	0	0	0	0
	mmu-miR-5127	0	0	0	0	0	0
	mmu-miR-5129-5p	0	0	0	0	0	0
	mmu-miR-5130	0	0	0	0	0	0
	mmu-miR-5131	0	0	0	0	0	0
	mmu-miR-5132-3p	0	0	0	0	0	0
	mmu-miR-5133	0	0	0	0	0	0
	mmu-miR-5135	0	0	0	0	0	0
	mmu-miR-5136	0	0	0	0	0	0
	mmu-miR-539-3p	0	0	0	0	0	0
	mmu-miR-539-5p	0	0	0	0	0	0
	mmu-miR-540-5p	0	0	0	0	0	0
	mmu-miR-541-3p	0	0	0	0	0	0
	mmu-miR-543-5p	0	0	0	0	0	0
	mmu-miR-544-3p	0	0	0	0	0	0
	mmu-miR-544-5p	0	0	0	0	0	0
	mmu-miR-546	0	0	0	0	0	0
	mmu-miR-547-3p	0	0	0	0	0	0
	mmu-miR-547-5p	0	0	0	0	0	0
	mmu-miR-551b-3p	0	0	0	0	0	0
	mmu-miR-551b-5p	0	0	0	0	0	0
	mmu-miR-5615-3p	0	0	0	0	0	0
	mmu-miR-5615-5p	0	0	0	0	0	0
	mmu-miR-5616-3p	0	0	0	0	0	0
	mmu-miR-5616-5p	0	0	0	0	0	0
	mmu-miR-5617-3p	0	0	0	0	0	0
	mmu-miR-5617-5p	0	0	0	0	0	0
	mmu-miR-5618-3p	0	0	0	0	0	0
	mmu-miR-5618-5p	0	0	0	0	0	0
	mmu-miR-5619-3p	0	0	0	0	0	0
	mmu-miR-5619-5p	0	0	0	0	0	0
	mmu-miR-5620-3p	0	0	0	0	0	0
	mmu-miR-5621-3p	0	0	0	0	0	0
	mmu-miR-5621-5p	0	0	0	0	0	0
	mmu-miR-5622-3p	0	0	0	0	0	0
	mmu-miR-5622-5p	0	0	0	0	0	0
	mmu-miR-5623-3p	0	0	0	0	0	0
	mmu-miR-5623-5p	0	0	0	0	0	0
	mmu-miR-5624-3p	0	0	0	0	0	0
	mmu-miR-5624-5p	0	0	0	0	0	0
	mmu-miR-5625-3p	0	0	0	0	0	0
	mmu-miR-5625-5p	0	0	0	0	0	0
	mmu-miR-5626-3p	0	0	0	0	0	0
	mmu-miR-5626-5p	0	0	0	0	0	0
	mmu-miR-5627-3p	0	0	0	0	0	0
	mmu-miR-5627-5p	0	0	0	0	0	0
	mmu-miR-568	0	0	0	0	0	0
	mmu-miR-5709	0	0	0	0	0	0
	mmu-miR-5710	0	0	0	0	0	0
	mmu-miR-582-5p	0	0	0	0	0	0
	mmu-miR-590-5p	0	0	0	0	0	0
	mmu-miR-592-3p	0	0	0	0	0	0
	mmu-miR-598-5p	0	0	0	0	0	0
	mmu-miR-599	0	0	0	0	0	0
	mmu-miR-6236	0	0	0	0	0	0
	mmu-miR-6237	0	0	0	0	0	0
	mmu-miR-6238	0	0	0	0	0	0
	mmu-miR-6239	0	0	0	0	0	0
	mmu-miR-6241	0	0	0	0	0	0
	mmu-miR-6244	0	0	0	0	0	0
	mmu-miR-6335	0	0	0	0	0	0
	mmu-miR-6336	0	0	0	0	0	0
	mmu-miR-6337	0	0	0	0	0	0
	mmu-miR-6338	0	0	0	0	0	0
	mmu-miR-6339	0	0	0	0	0	0
	mmu-miR-6340	0	0	0	0	0	0
	mmu-miR-6341	0	0	0	0	0	0
	mmu-miR-6342	0	0	0	0	0	0
	mmu-miR-6343	0	0	0	0	0	0
	mmu-miR-6344	0	0	0	0	0	0
	mmu-miR-6345	0	0	0	0	0	0
	mmu-miR-6346	0	0	0	0	0	0
	mmu-miR-6347	0	0	0	0	0	0
	mmu-miR-6348	0	0	0	0	0	0
	mmu-miR-6349	0	0	0	0	0	0
	mmu-miR-6350	0	0	0	0	0	0
	mmu-miR-6351	0	0	0	0	0	0
	mmu-miR-6352	0	0	0	0	0	0
	mmu-miR-6353	0	0	0	0	0	0
	mmu-miR-6354	0	0	0	0	0	0
	mmu-miR-6355	0	0	0	0	0	0
	mmu-miR-6356	0	0	0	0	0	0
	mmu-miR-6357	0	0	0	0	0	0
	mmu-miR-6358	0	0	0	0	0	0
	mmu-miR-6359	0	0	0	0	0	0
	mmu-miR-6360	0	0	0	0	0	0
	mmu-miR-6361	0	0	0	0	0	0
	mmu-miR-6362	0	0	0	0	0	0
	mmu-miR-6363	0	0	0	0	0	0
	mmu-miR-6364	0	0	0	0	0	0
	mmu-miR-6365	0	0	0	0	0	0
	mmu-miR-6366	0	0	0	0	0	0
	mmu-miR-6367	0	0	0	0	0	0
	mmu-miR-6368	0	0	0	0	0	0
	mmu-miR-6369	0	0	0	0	0	0
	mmu-miR-6370	0	0	0	0	0	0
	mmu-miR-6371	0	0	0	0	0	0
	mmu-miR-6372	0	0	0	0	0	0
	mmu-miR-6373	0	0	0	0	0	0
	mmu-miR-6374	0	0	0	0	0	0
	mmu-miR-6375	0	0	0	0	0	0
	mmu-miR-6376	0	0	0	0	0	0
	mmu-miR-6377	0	0	0	0	0	0
	mmu-miR-6378	0	0	0	0	0	0
	mmu-miR-6379	0	0	0	0	0	0
	mmu-miR-6380	0	0	0	0	0	0
	mmu-miR-6381	0	0	0	0	0	0
	mmu-miR-6382	0	0	0	0	0	0
	mmu-miR-6383	0	0	0	0	0	0
	mmu-miR-6384	0	0	0	0	0	0
	mmu-miR-6385	0	0	0	0	0	0
	mmu-miR-6386	0	0	0	0	0	0
	mmu-miR-6387	0	0	0	0	0	0
	mmu-miR-6388	0	0	0	0	0	0
	mmu-miR-6389	0	0	0	0	0	0
	mmu-miR-6390	0	0	0	0	0	0
	mmu-miR-6391	0	0	0	0	0	0
	mmu-miR-6392-3p	0	0	0	0	0	0
	mmu-miR-6392-5p	0	0	0	0	0	0
	mmu-miR-6393	0	0	0	0	0	0
	mmu-miR-6394	0	0	0	0	0	0
	mmu-miR-6395	0	0	0	0	0	0
	mmu-miR-6396	0	0	0	0	0	0
	mmu-miR-6397	0	0	0	0	0	0
	mmu-miR-6398	0	0	0	0	0	0
	mmu-miR-6399	0	0	0	0	0	0
	mmu-miR-6400	0	0	0	0	0	0
	mmu-miR-6401	0	0	0	0	0	0
	mmu-miR-6402	0	0	0	0	0	0
	mmu-miR-6403	0	0	0	0	0	0
	mmu-miR-6404	0	0	0	0	0	0
	mmu-miR-6405	0	0	0	0	0	0
	mmu-miR-6406	0	0	0	0	0	0
	mmu-miR-6407	0	0	0	0	0	0
	mmu-miR-6408	0	0	0	0	0	0
	mmu-miR-6409	0	0	0	0	0	0
	mmu-miR-6410	0	0	0	0	0	0
	mmu-miR-6411	0	0	0	0	0	0
	mmu-miR-6412	0	0	0	0	0	0
	mmu-miR-6413	0	0	0	0	0	0
	mmu-miR-6414	0	0	0	0	0	0
	mmu-miR-6415	0	0	0	0	0	0
	mmu-miR-6416-3p	0	0	0	0	0	0
	mmu-miR-6416-5p	0	0	0	0	0	0
	mmu-miR-6417	0	0	0	0	0	0
	mmu-miR-6418-5p	0	0	0	0	0	0
	mmu-miR-6419	0	0	0	0	0	0
	mmu-miR-6420	0	0	0	0	0	0
	mmu-miR-652-5p	0	0	0	0	0	0
	mmu-miR-653-3p	0	0	0	0	0	0
	mmu-miR-6537-5p	0	0	0	0	0	0
	mmu-miR-6539	0	0	0	0	0	0
	mmu-miR-6540-3p	0	0	0	0	0	0
	mmu-miR-6540-5p	0	0	0	0	0	0
	mmu-miR-6541	0	0	0	0	0	0
	mmu-miR-654-5p	0	0	0	0	0	0
	mmu-miR-665-3p	0	0	0	0	0	0
	mmu-miR-665-5p	0	0	0	0	0	0
	mmu-miR-666-3p	0	0	0	0	0	0
	mmu-miR-667-5p	0	0	0	0	0	0
	mmu-miR-668-5p	0	0	0	0	0	0
	mmu-miR-669a-3-3p	0	0	0	0	0	0
	mmu-miR-669b-3p	0	0	0	0	0	0
	mmu-miR-669b-5p	0	0	0	0	0	0
	mmu-miR-669c-3p	0	0	0	0	0	0
	mmu-miR-669c-5p	0	0	0	0	0	0
	mmu-miR-669d-2-3p	0	0	0	0	0	0
	mmu-miR-669d-3p	0	0	0	0	0	0
	mmu-miR-669d-5p	0	0	0	0	0	0
	mmu-miR-669e-3p	0	0	0	0	0	0
	mmu-miR-669e-5p	0	0	0	0	0	0
	mmu-miR-669f-3p	0	0	0	0	0	0
	mmu-miR-669f-5p	0	0	0	0	0	0
	mmu-miR-669g	0	0	0	0	0	0
	mmu-miR-669h-3p	0	0	0	0	0	0
	mmu-miR-669h-5p	0	0	0	0	0	0
	mmu-miR-669i	0	0	0	0	0	0
	mmu-miR-669j	0	0	0	0	0	0
	mmu-miR-669k-3p	0	0	0	0	0	0
	mmu-miR-669k-5p	0	0	0	0	0	0
	mmu-miR-669l-3p	0	0	0	0	0	0
	mmu-miR-669l-5p	0	0	0	0	0	0
	mmu-miR-669m-3p	0	0	0	0	0	0
	mmu-miR-669m-5p	0	0	0	0	0	0
	mmu-miR-669n	0	0	0	0	0	0
	mmu-miR-669o-5p	0	0	0	0	0	0
	mmu-miR-669p-3p	0	0	0	0	0	0
	mmu-miR-670-5p	0	0	0	0	0	0
	mmu-miR-672-3p	0	0	0	0	0	0
	mmu-miR-675-3p	0	0	0	0	0	0
	mmu-miR-675-5p	0	0	0	0	0	0
	mmu-miR-677-3p	0	0	0	0	0	0
	mmu-miR-678	0	0	0	0	0	0
	mmu-miR-679-3p	0	0	0	0	0	0
	mmu-miR-680	0	0	0	0	0	0
	mmu-miR-681	0	0	0	0	0	0
	mmu-miR-682	0	0	0	0	0	0
	mmu-miR-683	0	0	0	0	0	0
	mmu-miR-684	0	0	0	0	0	0
	mmu-miR-686	0	0	0	0	0	0
	mmu-miR-687	0	0	0	0	0	0
	mmu-miR-688	0	0	0	0	0	0
	mmu-miR-690	0	0	0	0	0	0
	mmu-miR-691	0	0	0	0	0	0
	mmu-miR-692	0	0	0	0	0	0
	mmu-miR-693-3p	0	0	0	0	0	0
	mmu-miR-693-5p	0	0	0	0	0	0
	mmu-miR-694	0	0	0	0	0	0
	mmu-miR-695	0	0	0	0	0	0
	mmu-miR-696	0	0	0	0	0	0
	mmu-miR-697	0	0	0	0	0	0
	mmu-miR-698-3p	0	0	0	0	0	0
	mmu-miR-698-5p	0	0	0	0	0	0
	mmu-miR-700-3p	0	0	0	0	0	0
	mmu-miR-701-3p	0	0	0	0	0	0
	mmu-miR-701-5p	0	0	0	0	0	0
	mmu-miR-702-5p	0	0	0	0	0	0
	mmu-miR-704	0	0	0	0	0	0
	mmu-miR-705	0	0	0	0	0	0
	mmu-miR-706	0	0	0	0	0	0
	mmu-miR-707	0	0	0	0	0	0
	mmu-miR-709	0	0	0	0	0	0
	mmu-miR-710	0	0	0	0	0	0
	mmu-miR-711	0	0	0	0	0	0
	mmu-miR-712-3p	0	0	0	0	0	0
	mmu-miR-712-5p	0	0	0	0	0	0
	mmu-miR-713	0	0	0	0	0	0
	mmu-miR-714	0	0	0	0	0	0
	mmu-miR-717	0	0	0	0	0	0
	mmu-miR-718	0	0	0	0	0	0
	mmu-miR-719	0	0	0	0	0	0
	mmu-miR-721	0	0	0	0	0	0
	mmu-miR-741-3p	0	0	0	0	0	0
	mmu-miR-741-5p	0	0	0	0	0	0
	mmu-miR-742-3p	0	0	0	0	0	0
	mmu-miR-742-5p	0	0	0	0	0	0
	mmu-miR-743a-3p	0	0	0	0	0	0
	mmu-miR-743a-5p	0	0	0	0	0	0
	mmu-miR-743b-3p	0	0	0	0	0	0
	mmu-miR-743b-5p	0	0	0	0	0	0
	mmu-miR-758-5p	0	0	0	0	0	0
	mmu-miR-759	0	0	0	0	0	0
	mmu-miR-760-5p	0	0	0	0	0	0
	mmu-miR-761	0	0	0	0	0	0
	mmu-miR-762	0	0	0	0	0	0
	mmu-miR-763	0	0	0	0	0	0
	mmu-miR-764-3p	0	0	0	0	0	0
	mmu-miR-770-3p	0	0	0	0	0	0
	mmu-miR-770-5p	0	0	0	0	0	0
	mmu-miR-7a-5p	0	0	0	0	0	0
	mmu-miR-7b-3p	0	0	0	0	0	0
	mmu-miR-7b-5p	0	0	0	0	0	0
	mmu-miR-802-3p	0	0	0	0	0	0
	mmu-miR-802-5p	0	0	0	0	0	0
	mmu-miR-804	0	0	0	0	0	0
	mmu-miR-873a-3p	0	0	0	0	0	0
	mmu-miR-873b	0	0	0	0	0	0
	mmu-miR-875-3p	0	0	0	0	0	0
	mmu-miR-875-5p	0	0	0	0	0	0
	mmu-miR-876-3p	0	0	0	0	0	0
	mmu-miR-876-5p	0	0	0	0	0	0
	mmu-miR-878-3p	0	0	0	0	0	0
	mmu-miR-878-5p	0	0	0	0	0	0
	mmu-miR-879-3p	0	0	0	0	0	0
	mmu-miR-879-5p	0	0	0	0	0	0
	mmu-miR-880-3p	0	0	0	0	0	0
	mmu-miR-880-5p	0	0	0	0	0	0
	mmu-miR-881-3p	0	0	0	0	0	0
	mmu-miR-881-5p	0	0	0	0	0	0
	mmu-miR-882	0	0	0	0	0	0
	mmu-miR-883a-3p	0	0	0	0	0	0
	mmu-miR-883a-5p	0	0	0	0	0	0
	mmu-miR-883b-3p	0	0	0	0	0	0
	mmu-miR-883b-5p	0	0	0	0	0	0
	mmu-miR-92a-2-5p	0	0	0	0	0	0
	mmu-miR-92b-5p	0	0	0	0	0	0
	mmu-miR-96-3p	0	0	0	0	0	0
	mmu-miR-96-5p	0	0	0	0	0	0

## Sheet: Table S3
Table S3 The expression patterns of known miRNAs in at least one of the six libraries of sera with sequence reads ≧50
	miRNA	FK506 3d	FK506 7d	FK506 14d	No FK506 3d	No FK506 7d	No FK506 14d
	mmu-let-7a-5p	17735	4242	4227	1192	2031	1115
	mmu-let-7b-5p	975	278	268	358	761	486
	mmu-let-7c-5p	4542	3321	4566	2733	5961	4206
	mmu-let-7d-3p	335	266	258	529	756	242
	mmu-let-7d-5p	652	1006	766	336	610	317
	mmu-let-7e-5p	3993	10	18	18	39	5
	mmu-let-7f-5p	21056	7827	8530	1564	5409	2498
	mmu-let-7g-5p	965	750	711	537	1686	881
	mmu-let-7i-5p	8290	9935	9349	2034	6119	2961
	mmu-miR-100-5p	221	9	15	14	82	9
	mmu-miR-101a-3p	1089	52	59	25	221	57
	mmu-miR-101b-3p	29	77	70	48	261	66
	mmu-miR-103-3p	1695	853	593	530	2406	516
	mmu-miR-106b-3p	831	1695	989	1038	2668	809
	mmu-miR-107-3p	690	475	153	457	1872	422
	mmu-miR-10a-5p	961	1866	5870	1999	11486	2184
	mmu-miR-10b-5p	1463	6153	13506	5186	51721	5739
	mmu-miR-1198-5p	127	310	181	319	568	229
	mmu-miR-122-5p	0	60	5	26	1	30
	mmu-miR-124-3p	182	0	0	0	0	0
	mmu-miR-125a-5p	1379	221	433	367	747	447
	mmu-miR-125b-5p	552	42	183	65	151	66
	mmu-miR-126-5p	458	180	234	182	2099	316
	mmu-miR-127-3p	2567	74	206	136	398	116
	mmu-miR-128-1-5p	95	11	16	8	5	6
	mmu-miR-128-3p	1348	109	96	282	457	144
	mmu-miR-129-1-3p	56	0	0	0	2	0
	mmu-miR-129-2-3p	234	0	0	4	3	0
	mmu-miR-129-5p	114	0	0	0	2	0
	mmu-miR-1306-5p	20	15	24	11	51	14
	mmu-miR-130a-3p	284	152	87	88	359	84
	mmu-miR-130b-3p	59	164	81	87	296	73
	mmu-miR-132-3p	60	7	0	5	4	4
	mmu-miR-133a-3p	370	418	945	1281	2138	618
	mmu-miR-136-3p	119	4	2	2	28	2
	mmu-miR-138-1-3p	60	2	0	0	1	1
	mmu-miR-138-5p	54	0	2	0	3	1
	mmu-miR-140-3p	1193	2335	1680	1222	3746	759
	mmu-miR-141-3p	9	10	8	12	57	9
	mmu-miR-142-5p	417	670	642	914	4240	822
	mmu-miR-143-3p	6608	597	1047	842	6070	1054
	mmu-miR-144-3p	44	28	43	49	68	69
	mmu-miR-144-5p	55	109	157	39	95	53
	mmu-miR-146a-5p	92	55	194	89	384	97
	mmu-miR-146b-5p	358	81	333	56	347	68
	mmu-miR-148a-3p	344	661	449	229	1995	400
	mmu-miR-148a-5p	10	53	14	7	53	6
	mmu-miR-148b-3p	26	12	25	3	54	19
	mmu-miR-149-5p	148	11	29	41	54	40
	mmu-miR-150-5p	426	622	948	3926	9054	5531
	mmu-miR-151-3p	676	1334	998	934	1988	880
	mmu-miR-151-5p	576	65	57	10	102	20
	mmu-miR-15a-5p	157	152	148	90	418	94
	mmu-miR-15b-5p	70	72	99	44	53	20
	mmu-miR-16-5p	2098	5121	4598	2793	16659	2549
	mmu-miR-181a-1-3p	187	12	16	6	29	6
	mmu-miR-181a-2-3p	102	61	92	150	179	92
	mmu-miR-181a-5p	94740	5458	7981	2421	7530	2265
	mmu-miR-181b-5p	8327	680	892	260	993	376
	mmu-miR-181c-3p	57	10	7	3	23	3
	mmu-miR-181c-5p	1344	336	336	209	864	145
	mmu-miR-181d-5p	301	187	260	147	308	123
	mmu-miR-182-5p	71	215	166	61	519	101
	mmu-miR-1839-5p	103	127	130	57	300	94
	mmu-miR-1843a-5p	12	77	43	26	117	25
	mmu-miR-1843b-5p	13	63	35	23	118	26
	mmu-miR-186-5p	698	692	922	537	2313	345
	mmu-miR-18a-3p	33	31	11	34	70	32
	mmu-miR-191-5p	4383	9325	9978	7727	14835	5614
	mmu-miR-192-5p	1666	5509	1627	837	8363	1256
	mmu-miR-1964-3p	15	17	4	51	50	36
	mmu-miR-1981-5p	30	34	21	24	39	53
	mmu-miR-199a-3p	34	25	45	53	447	104
	mmu-miR-199b-3p	34	25	45	53	447	104
	mmu-miR-19b-3p	80	35	50	22	205	33
	mmu-miR-203-3p	19	18	11	13	64	12
	mmu-miR-204-5p	1939	12	39	21	93	16
	mmu-miR-205-5p	38	57	50	66	160	112
	mmu-miR-215-3p	10	31	69	35	189	25
	mmu-miR-215-5p	251	818	925	578	7034	1757
	mmu-miR-218-5p	107	0	0	0	1	2
	mmu-miR-219-2-3p	467	0	0	0	0	0
	mmu-miR-21a-5p	857	1164	1226	406	3114	802
	mmu-miR-221-3p	257	211	141	287	582	149
	mmu-miR-222-3p	632	109	124	132	289	86
	mmu-miR-223-3p	9	6	10	15	67	13
	mmu-miR-22-3p	4761	10667	5601	4151	15562	2625
	mmu-miR-23a-3p	12	55	63	56	152	33
	mmu-miR-25-3p	6038	13644	15427	10353	46077	8768
	mmu-miR-25-5p	37	79	59	43	61	26
	mmu-miR-26a-5p	8982	867	1076	323	1411	358
	mmu-miR-26b-5p	379	155	195	84	265	98
	mmu-miR-27b-3p	8323	1263	1284	821	5856	1098
	mmu-miR-29a-3p	141	65	75	65	348	45
	mmu-miR-301a-3p	52	21	25	25	124	33
	mmu-miR-3057-5p	15	59	40	11	33	19
	mmu-miR-30a-3p	168	86	179	44	228	70
	mmu-miR-30a-5p	6648	7789	7716	2652	21814	2072
	mmu-miR-30c-2-3p	50	50	39	6	22	11
	mmu-miR-30c-5p	286	332	316	170	744	119
	mmu-miR-30d-5p	2691	2966	2972	1787	5091	1680
	mmu-miR-30e-3p	136	40	75	21	100	17
	mmu-miR-30e-5p	580	696	775	459	4077	395
	mmu-miR-3107-3p	306	373	247	324	421	320
	mmu-miR-3107-5p	2296934	2595120	2482905	2479682	2720114	2440098
	mmu-miR-320-3p	1450	844	543	465	796	487
	mmu-miR-323-3p	63	0	0	0	0	0
	mmu-miR-328-3p	311	328	217	524	714	440
	mmu-miR-338-3p	347	0	0	0	2	1
	mmu-miR-340-5p	777	68	46	20	159	34
	mmu-miR-342-3p	150	40	63	53	96	60
	mmu-miR-351-5p	34	63	157	50	160	40
	mmu-miR-375-3p	1055	1303	1327	1221	2528	1704
	mmu-miR-378a-3p	698	1310	1130	928	2193	514
	mmu-miR-381-3p	611	0	6	1	46	3
	mmu-miR-409-3p	470	44	54	25	66	25
	mmu-miR-410-3p	370	8	4	4	21	5
	mmu-miR-411-5p	674	2	16	5	37	7
	mmu-miR-421-3p	81	65	42	45	181	42
	mmu-miR-423-3p	879	387	297	706	955	398
	mmu-miR-423-5p	10646	6672	4228	4663	4241	5478
	mmu-miR-425-5p	76	174	185	120	388	145
	mmu-miR-429-3p	8	0	2	7	54	3
	mmu-miR-431-3p	53	0	3	0	3	0
	mmu-miR-434-3p	34	20	45	61	133	63
	mmu-miR-451a	523	796	1326	765	4012	776
	mmu-miR-484	260	357	292	526	978	427
	mmu-miR-485-5p	91	2	0	1	2	2
	mmu-miR-486-3p	1879	2429	1754	2735	3492	2422
	mmu-miR-486-5p	2302676	2603634	2494607	2485505	2727053	2448326
	mmu-miR-487b-3p	54	0	0	0	2	0
	mmu-miR-532-5p	77	98	119	90	443	66
	mmu-miR-541-5p	9	23	68	18	100	16
	mmu-miR-574-3p	45	26	28	72	550	18
	mmu-miR-6243	146	110	104	60	67	25
	mmu-miR-654-3p	83	0	0	0	0	0
	mmu-miR-671-3p	59	23	39	29	26	31
	mmu-miR-676-3p	225	317	430	335	474	235
	mmu-miR-744-5p	1302	645	425	317	468	314
	mmu-miR-874-3p	75	4	4	0	4	2
	mmu-miR-92a-3p	17035	22068	19175	18312	29406	19852
	mmu-miR-92b-3p	2651	97	109	174	145	162
	mmu-miR-93-5p	591	1762	1407	979	3228	742
	mmu-miR-9-5p	7683	0	1	0	0	0
	mmu-miR-98-5p	652	118	104	46	149	60
	mmu-miR-99a-5p	82	17	25	15	71	11
	mmu-miR-99b-5p	729	147	191	316	698	337

## Sheet: Table S4
Table S4 The expression patterns of known miRNAs in at least one of the six libraries of sera with sequence reads ≧5000
	miRNA	FK506 3d	FK506 7d	FK506 14d	No FK506 3d	No FK506 7d	No FK506 14d
	mmu-let-7c-5p	4542	3321	4566	2733	5961	4206
	mmu-miR-10a-5p	961	1866	5870	1999	11486	2184
	mmu-miR-10b-5p	1463	6153	13506	5186	51721	5739
	mmu-miR-150-5p	426	622	948	3926	9054	5531
	mmu-miR-16-5p	2098	5121	4598	2793	16659	2549
	mmu-miR-191-5p	4383	9325	9978	7727	14835	5614
	mmu-miR-192-5p	1666	5509	1627	837	8363	1256
	mmu-miR-22-3p	4761	10667	5601	4151	15562	2625
	mmu-miR-30d-5p	2691	2966	2972	1787	5091	1680

## Sheet: Table S5
Table S5 The expression patterns of known miRNAs with sequence reads ≧ 5000 in all six libraries
	miRNA	FK506 3d	FK506 7d	FK506 14d	No FK506 3d	No FK506 7d	No FK506 14d
	mmu-miR-25-3p	6038	13644	15427	10353	46077	8768
	mmu-miR-3107-5p	2296934	2595120	2482905	2479682	2720114	2440098
	mmu-miR-486-5p	2302676	2603634	2494607	2485505	2727053	2448326
	mmu-miR-92a-3p	17035	22068	19175	18312	29406	19852

## Sheet: Table S6
Table S6 Ten miRNAs with most abdundant sequence reads in each of these six libraries
	FK506 3d	reads	FK506 7d	reads	FK506 14d	reads	No FK506 3d	reads	No FK506 7d	reads	No FK506 14d	reads
	mmu-miR-486-5p	2302676	mmu-miR-486-5p	2603634	mmu-miR-486-5p	2494607	mmu-miR-486-5p	2485505	mmu-miR-486-5p	2727053	mmu-miR-486-5p	2448326
	mmu-miR-3107-5p	2296934	mmu-miR-3107-5p	2595120	mmu-miR-3107-5p	2482905	mmu-miR-3107-5p	2479682	mmu-miR-3107-5p	2720114	mmu-miR-3107-5p	2440098
	mmu-miR-181a-5p	94740	mmu-miR-92a-3p	22068	mmu-miR-92a-3p	19175	mmu-miR-92a-3p	18312	mmu-miR-10b-5p	51721	mmu-miR-92a-3p	19852
	mmu-let-7f-5p	21056	mmu-miR-25-3p	13644	mmu-miR-25-3p	15427	mmu-miR-25-3p	10353	mmu-miR-25-3p	46077	mmu-miR-25-3p	8768
	mmu-let-7a-5p	17735	mmu-miR-22-3p	10667	mmu-miR-10b-5p	13506	mmu-miR-191-5p	7727	mmu-miR-92a-3p	29406	mmu-miR-10b-5p	5739
	mmu-miR-92a-3p	17035	mmu-let-7i-5p	9935	mmu-miR-191-5p	9978	mmu-miR-10b-5p	5186	mmu-miR-30a-5p	21814	mmu-miR-191-5p	5614
	mmu-miR-423-5p	10646	mmu-miR-191-5p	9325	mmu-let-7i-5p	9349	mmu-miR-423-5p	4663	mmu-miR-16-5p	16659	mmu-miR-150-5p	5531
	mmu-miR-26a-5p	8982	mmu-let-7f-5p	7827	mmu-let-7f-5p	8530	mmu-miR-22-3p	4151	mmu-miR-22-3p	15562	mmu-miR-423-5p	5478
	mmu-miR-181b-5p	8327	mmu-miR-30a-5p	7789	mmu-miR-181a-5p	7981	mmu-miR-150-5p	3926	mmu-miR-191-5p	14835	mmu-let-7c-5p	4206
	mmu-miR-27b-3p	8323	mmu-miR-423-5p	6672	mmu-miR-30a-5p	7716	mmu-miR-16-5p	2793	mmu-miR-10a-5p	11486	mmu-let-7i-5p	2961
