# Supplementary material for: Identification of Circulating miRNAs in a Mouse Model of Nerve Allograft Transplantation under FK506 Immunosuppression by Illumina Small RNA Deep Sequencing
Source: Dis Markers. 2015 Sep 8;2015:863192. doi: 10.1155/2015/863192 (PMC4578739; doi:10.1155/2015/863192)
Supplement: Supplementary file 1 — Expression profile of the miRNAs by Illumina small RNA deep sequencing. [file 863192.f1.zip › 863192.f1/Supplementary file 2.xlsx]

## Sheet: let-7e-5p
# "1" : interaction predicted; "0" : interaction not predicted.
Refseq	Symbol	Description	miranda	mirtarget2	pictar	pita	rnahybrid
NM_001004155	9930012K11Rik	RIKEN cDNA 9930012K11 gene	1	1	1	1	1
NM_001017966	Ddi2	DNA-damage inducible protein 2	1	1	1	1	1
NM_001024139	Adamts15	a disintegrin-like and metallopeptidase (reprolysin type) with thrombospondin type 1 motif, 15	1	1	1	1	1
NM_001025067	Lrig2	leucine-rich repeats and immunoglobulin-like domains 2	1	1	1	1	1
NM_001029912	Zswim5	zinc finger, SWIM domain containing 5	1	1	1	1	1
NM_001031772	Lin28b	lin-28 homolog B (C. elegans)	1	1	1	1	1
NM_001033759	Tmem2	transmembrane protein 2	1	1	1	1	1
NM_001037099	Cacnb4	calcium channel, voltage-dependent, beta 4 subunit	1	1	1	1	1
NM_007520	Bach1	BTB and CNC homology 1	1	1	1	1	1
NM_007719	Ccr7	chemokine (C-C motif) receptor 7	1	1	1	1	1
NM_007892	E2f5	E2F transcription factor 5	1	1	1	1	1
NM_007916	Ddx19a	DEAD (Asp-Glu-Ala-Asp) box polypeptide 19a	1	1	1	1	1
NM_007958	Smarcad1	SWI/SNF-related, matrix-associated actin-dependent regulator of chromatin, subfamily a, containing DEAD/H box 1	1	1	1	1	1
NM_008088	Gas7	growth arrest specific 7	1	1	1	1	1
NM_008213	Hand1	heart and neural crest derivatives expressed transcript 1	1	1	1	1	1
NM_008555	Masp1	mannan-binding lectin serine peptidase 1	1	1	1	1	1
NM_008783	Pbx1	pre B-cell leukemia transcription factor 1	1	1	1	1	1
NM_009041	Rdx	radixin	1	1	1	1	1
NM_010264	Nr6a1	nuclear receptor subfamily 6, group A, member 1	1	1	1	1	1
NM_011081	Piga	phosphatidylinositol glycan anchor biosynthesis, class A	1	1	1	1	1
NM_013790	Abcc5	ATP-binding cassette, sub-family C (CFTR/MRP), member 5	1	1	1	1	1
NM_013906	Adamts8	a disintegrin-like and metallopeptidase (reprolysin type) with thrombospondin type 1 motif, 8	1	1	1	1	1
NM_015747	Slc20a1	solute carrier family 20, member 1	1	1	1	1	1
NM_019711	Rbms2	RNA binding motif, single stranded interacting protein 2	1	1	1	1	1
NM_022890	Cldn12	claudin 12	1	1	1	1	1
NM_025840	Bzw2	basic leucine zipper and W2 domains 2	1	1	1	1	1
NM_025845	Prpf38b	PRP38 pre-mRNA processing factor 38 (yeast) domain containing B	1	1	1	1	1
NM_025872	Golt1b	golgi transport 1 homolog B (S. cerevisiae)	1	1	1	1	1
NM_025961	Gatm	glycine amidinotransferase (L-arginine:glycine amidinotransferase)	1	1	1	1	1
NM_026343	Stx17	syntaxin 17	1	1	1	1	1
NM_028711	Slc25a27	solute carrier family 25, member 27	1	1	1	1	1
NM_028800	Stk40	serine/threonine kinase 40	1	1	1	1	1
NM_028876	Tmed5	transmembrane emp24 protein transport domain containing 5	1	1	1	1	1
NM_031997	Tmem2	transmembrane protein 2	1	1	1	1	1
NM_146123	Cacnb4	calcium channel, voltage-dependent, beta 4 subunit	1	1	1	1	1
NM_199025	Zbtb26	zinc finger and BTB domain containing 26	1	1	1	1	1
NM_183029	Igf2bp2	insulin-like growth factor 2 mRNA binding protein 2	1	1	1	1	1
NM_178686	Ccdc100	coiled-coil domain containing 100	1	1	1	1	1
NM_178668	E430028B21Rik	RIKEN cDNA E430028B21 gene	1	1	1	1	1
NM_177152	Lrig3	leucine-rich repeats and immunoglobulin-like domains 3	1	1	1	1	1
NM_178922	Hic2	hypermethylated in cancer 2	1	1	1	1	1
NM_172445	Wdr37	WD repeat domain 37	1	1	1	1	1
NM_207636	Fndc3a	fibronectin type III domain containing 3a	1	1	1	1	1
NM_172685	Slc25a24	solute carrier family 25 (mitochondrial carrier, phosphate carrier), member 24	1	1	1	1	1
NM_178730	Tmprss11f	transmembrane protease, serine 11f	1	1	1	1	1
NM_181277	Col14a1	collagen, type XIV, alpha 1	1	1	1	1	1
NM_172284	Ddx19b	DEAD (Asp-Glu-Ala-Asp) box polypeptide 19b	1	1	1	1	1
NM_175565	Cdv3	carnitine deficiency-associated gene expressed in ventricle 3	1	0	1	1	1
NM_172467	Zc3hav1l	zinc finger CCCH-type, antiviral 1-like	0	1	1	1	1
NM_172468	Snx30	sorting nexin family member 30	1	0	1	1	1
NM_198899	Ugcgl1	UDP-glucose ceramide glucosyltransferase-like 1	1	0	1	1	1
NM_178149	Pik3ip1	phosphoinositide-3-kinase interacting protein 1	1	0	1	1	1
NM_175472	Zcchc11	zinc finger, CCHC domain containing 11	1	0	1	1	1
NM_176958	Hif1an	hypoxia-inducible factor 1, alpha subunit inhibitor	1	1	0	1	1
NM_172964	Arhgap28	Rho GTPase activating protein 28	1	0	1	1	1
NM_175446	Zmat1	zinc finger, matrin type 1	1	0	1	1	1
NM_175433	Zfp710	zinc finger protein 710	1	0	1	1	1
NM_172550	A130042E20Rik	RIKEN cDNA A130042E20 gene	1	1	0	1	1
NM_198604	Plekhg6	pleckstrin homology domain containing, family G (with RhoGef domain) member 6	1	0	1	1	1
NM_172563	Hlf	hepatic leukemia factor	1	1	0	1	1
NM_175485	Prtg	protogenin homolog (Gallus gallus)	1	1	0	1	1
NM_178142	Lcorl	ligand dependent nuclear receptor corepressor-like	1	0	1	1	1
NM_199322	Dot1l	DOT1-like, histone H3 methyltransferase (S. cerevisiae)	1	0	1	1	1
NM_175549	Robo2	roundabout homolog 2 (Drosophila)	1	0	1	1	1
NM_172677	Ythdf3	YTH domain family 3	1	0	1	1	1
NM_172397	Limd2	LIM domain containing 2	1	0	1	1	1
NM_175686	Prrx1	paired related homeobox 1	1	0	1	1	1
NM_175543	Rab11fip4	RAB11 family interacting protein 4 (class II)	1	1	0	1	1
NM_175535	Arhgap20	Rho GTPase activating protein 20	1	0	1	1	1
NM_177784	Klhl23	kelch-like 23 (Drosophila)	1	0	1	1	1
NM_175833	Cdv3	carnitine deficiency-associated gene expressed in ventricle 3	1	0	1	1	1
NM_172121	Zc3h3	zinc finger CCCH type containing 3	1	0	1	1	1
NM_172442	Dtx4	deltex 4 homolog (Drosophila)	1	0	1	1	1
NM_201396	Sall4	sal-like 4 (Drosophila)	1	1	0	1	1
NM_172876	Gpatch3	G patch domain containing 3	1	1	0	1	1
NM_178389	Gale	galactose-4-epimerase, UDP	1	0	1	1	1
NM_172839	Ccnj	cyclin J	0	1	1	1	1
NM_183180	Tspan18	tetraspanin 18	1	0	1	1	1
NM_183173	Ankrd43	ankyrin repeat domain 43	1	1	0	1	1
NM_178691	Yod1	YOD1 OTU deubiquitinating enzyme 1 homologue (S. cerevisiae)	1	0	1	1	1
NM_172925	Klhl31	kelch-like 31 (Drosophila)	1	1	0	1	1
NM_181856	Tmc8	transmembrane channel-like 8	1	1	0	1	1
NM_173001	Jmjd1a	jumonji domain containing 1A	1	0	1	1	1
NM_173870	Mgat4a	mannoside acetylglucosaminyltransferase 4, isoenzyme A	1	0	1	1	1
NM_173048	Gga3	golgi associated, gamma adaptin ear containing, ARF binding protein 3	1	0	1	1	1
NM_173053	Limk2	LIM motif-containing protein kinase 2	1	1	0	1	1
NM_173182	Fndc3b	fibronectin type III domain containing 3B	1	0	1	1	1
NM_173399	Zbtb5	zinc finger and BTB domain containing 5	1	0	1	1	1
NM_173408	Dcun1d3	DCN1, defective in cullin neddylation 1, domain containing 3 (S. cerevisiae)	1	0	1	1	1
NM_173413	Rab8b	RAB8B, member RAS oncogene family	1	0	1	1	1
NM_172815	Rspo2	R-spondin 2 homolog (Xenopus laevis)	0	1	1	1	1
NM_172790	Ankrd52	ankyrin repeat domain 52	1	0	1	1	1
NM_172596	Sec24c	SEC24 related gene family, member C (S. cerevisiae)	1	0	1	1	1
NM_175383	B3gnt1	UDP-GlcNAc:betaGal beta-1,3-N-acetylglucosaminyltransferase 1	1	0	1	1	1
NM_178418	Ccdc144b	coiled-coil domain containing 144B	1	1	0	1	1
NM_178576	Cpsf4	cleavage and polyadenylation specific factor 4	1	0	1	1	1
NM_172671	Lgr4	leucine-rich repeat-containing G protein-coupled receptor 4	1	1	0	1	1
NM_172673	Frmd5	FERM domain containing 5	1	0	1	1	1
NM_175303	Sall4	sal-like 4 (Drosophila)	1	1	0	1	1
NM_178066	1110012D08Rik	RIKEN cDNA 1110012D08 gene	1	0	1	1	1
NM_175212	Tmem65	transmembrane protein 65	1	0	1	1	1
NM_175201	Rnf38	ring finger protein 38	1	0	1	1	1
NM_172779	Ddx26b	DEAD/H (Asp-Glu-Ala-Asp/His) box polypeptide 26B	1	1	0	1	1
NM_172782	Nxt2	nuclear transport factor 2-like export factor 2	1	0	1	1	1
NM_183390	Klhl6	kelch-like 6 (Drosophila)	0	1	1	1	1
NM_183355	Pbx1	pre B-cell leukemia transcription factor 1	1	0	1	1	1
NM_175184	2610528K11Rik	RIKEN cDNA 2610528K11 gene	1	0	1	1	1
NM_153177	Eif2c4	eukaryotic translation initiation factor 2C, 4	1	0	1	1	1
NM_212444	Gyk	glycerol kinase	1	1	0	1	1
NM_153394	Gpr156	G protein-coupled receptor 156	1	0	1	1	1
NM_153404	Liph	lipase, member H	1	0	1	1	1
NM_177034	Apba1	amyloid beta (A4) precursor protein binding, family A, member 1	1	0	1	1	1
NM_177243	Slc26a9	solute carrier family 26, member 9	1	0	1	1	1
NM_177259	Dab1	disabled homolog 1 (Drosophila)	1	0	1	1	1
NM_153552	Thoc1	THO complex 1	1	1	0	1	1
NM_212435	Foxp2	forkhead box P2	1	0	1	1	1
NM_207261	Kcnk18	potassium channel, subfamily K, member 18	1	1	0	1	1
NM_177162	9930032O22Rik	RIKEN cDNA 9930032O22 gene	1	1	0	1	1
NM_153096	Zfp353	zinc finger protein 353	1	1	0	1	1
NM_177566	Arhgef15	Rho guanine nucleotide exchange factor (GEF) 15	0	1	1	1	1
NM_177224	Chd9	chromodomain helicase DNA binding protein 9	1	0	1	1	1
NM_153131	Unc5a	unc-5 homolog A (C. elegans)	1	0	1	1	1
NM_152220	Stx3	syntaxin 3	1	0	1	1	1
NM_212449	AU019823	expressed sequence AU019823	0	1	1	1	1
NM_153459	Dusp7	dual specificity phosphatase 7	1	0	1	1	1
NM_148941	Elovl4	elongation of very long chain fatty acids (FEN1/Elo2, SUR4/Elo3, yeast)-like 4	1	0	1	1	1
NM_153515	Ammecr1l	AMME chromosomal region gene 1-like	1	0	1	1	1
NM_177475	Zfp280b	zinc finger protein 280b	1	0	1	1	1
NM_148931	Slc6a5	solute carrier family 6 (neurotransmitter transporter, glycine), member 5	1	0	1	1	1
NM_153194	Zfp740	zinc finger protein 740	1	0	1	1	1
NM_207676	Cadm1	cell adhesion molecule 1	1	0	1	1	1
NM_207675	Cadm1	cell adhesion molecule 1	1	0	1	1	1
NM_001001321	Slc35d2	solute carrier family 35, member D2	1	1	0	1	1
NM_001002846	Fbxl12	F-box and leucine-rich repeat protein 12	1	1	0	1	1
NM_001004164	Gnptab	N-acetylglucosamine-1-phosphate transferase, alpha and beta subunits	1	0	1	1	1
NM_001008427	EG434179	predicted gene, EG434179	1	1	0	1	1
NM_001012273	Birc5	baculoviral IAP repeat-containing 5	1	1	0	1	1
NM_001013386	Rasl10b	RAS-like, family 10, member B	1	0	1	1	1
NM_001013616	Trim6	tripartite motif-containing 6	1	1	0	1	1
NM_001025431	Btbd3	BTB (POZ) domain containing 3	1	0	1	1	1
NM_001025568	Pde1c	phosphodiesterase 1C	1	0	1	1	1
NM_001025600	Cadm1	cell adhesion molecule 1	1	0	1	1	1
NM_001033139	AI846148	expressed sequence AI846148	1	0	1	1	1
NM_001033262	2014-03-09	membrane-associated ring finger (C3HC4) 9	1	0	1	1	1
NM_001033273	5031439G07Rik	RIKEN cDNA 5031439G07 gene	1	0	1	1	1
NM_001033275	Glt8d3	glycosyltransferase 8 domain containing 3	1	0	1	1	1
NM_001033324	Zbtb16	zinc finger and BTB domain containing 16	1	0	1	1	1
NM_001033369	Acvr1c	activin A receptor, type IC	0	1	1	1	1
NM_001034030	Limk2	LIM motif-containing protein kinase 2	1	1	0	1	1
NM_001037846	Cnot2	CCR4-NOT transcription complex, subunit 2	1	0	1	1	1
NM_001037955	Dusp22	dual specificity phosphatase 22	1	0	1	1	1
NM_001038710	Tmod2	tropomodulin 2	1	0	1	1	1
NM_001039039	Kctd21	potassium channel tetramerisation domain containing 21	1	0	1	1	1
NM_001039080	Rbms2	RNA binding motif, single stranded interacting protein 2	0	1	1	1	1
NM_001039090	Skil	SKI-like	1	0	1	1	1
NM_001039388	Wdr37	WD repeat domain 37	0	1	1	1	1
NM_001039472	Kif21b	kinesin family member 21B	1	0	1	1	1
NM_001039509	Pnkd	paroxysmal nonkinesiogenic dyskinesia	1	0	1	1	1
NM_001076789	Cbx5	chromobox homolog 5 (Drosophila HP1a)	1	1	0	1	1
NM_001080743	Grk4	G protein-coupled receptor kinase 4	1	1	0	1	1
NM_001081221	Ercc6	excision repair cross-complementing rodent repair deficiency, complementation group 6	1	1	0	1	1
NM_001081357	Map4k3	mitogen-activated protein kinase kinase kinase kinase 3	1	1	0	1	1
NM_007420	Adrb2	adrenergic receptor, beta 2	0	1	1	1	1
NM_007457	Ap1s1	adaptor protein complex AP-1, sigma 1	1	0	1	1	1
NM_007598	Cap1	CAP, adenylate cyclase-associated protein 1 (yeast)	1	0	1	1	1
NM_007626	Cbx5	chromobox homolog 5 (Drosophila HP1a)	1	1	0	1	1
NM_007698	Chrm1	cholinergic receptor, muscarinic 1, CNS	1	0	1	1	1
NM_007737	Col5a2	collagen, type V, alpha 2	1	0	1	1	1
NM_007868	Dmd	dystrophin, muscular dystrophy	1	1	0	1	1
NM_007880	Arid3a	AT rich interactive domain 3A (Bright like)	1	0	1	1	1
NM_008065	Gabpa	GA repeat binding protein, alpha	1	0	1	1	1
NM_008098	Mtpn	myotrophin	1	0	1	1	1
NM_008194	Gyk	glycerol kinase	1	1	0	1	1
NM_008216	Has2	hyaluronan synthase 2	1	0	1	1	1
NM_008377	Lrig1	leucine-rich repeats and immunoglobulin-like domains 1	1	0	1	1	1
NM_008421	Kcnc1	potassium voltage gated channel, Shaw-related subfamily, member 1	1	0	1	1	1
NM_008465	Kpna1	karyopherin (importin) alpha 1	1	0	1	1	1
NM_008627	Meis3	Meis homeobox 3	1	0	1	1	1
NM_008702	Nlk	nemo like kinase	1	0	1	1	1
NM_008796	Pctp	phosphatidylcholine transfer protein	1	1	0	1	1
NM_008988	Punc	putative neuronal cell adhesion molecule	1	1	0	1	1
NM_009032	Rbm4	RNA binding motif protein 4	1	1	0	1	1
NM_009035	Rbpj	recombination signal binding protein for immunoglobulin kappa J region	1	0	1	1	1
NM_009104	Rrm2	ribonucleotide reductase M2	1	0	1	1	1
NM_009211	Smarcc1	SWI/SNF related, matrix associated, actin dependent regulator of chromatin, subfamily c, member 1	1	0	1	1	1
NM_009222	Snap23	synaptosomal-associated protein 23	1	0	1	1	1
NM_009319	Tarbp2	TAR (HIV) RNA binding protein 2	1	0	1	1	1
NM_009329	Zfp354a	zinc finger protein 354A	1	0	1	1	1
NM_009370	Tgfbr1	transforming growth factor, beta receptor I	0	1	1	1	1
NM_009381	Thrsp	thyroid hormone responsive SPOT14 homolog (Rattus)	1	1	0	1	1
NM_009397	Tnfaip3	tumor necrosis factor, alpha-induced protein 3	1	0	1	1	1
NM_009579	Slc30a1	solute carrier family 30 (zinc transporter), member 1	1	0	1	1	1
NM_009593	Abcg1	ATP-binding cassette, sub-family G (WHITE), member 1	1	0	1	1	1
NM_009661	Alox8	arachidonate 8-lipoxygenase	1	1	0	1	1
NM_009671	Ankfy1	ankyrin repeat and FYVE domain containing 1	1	0	1	1	1
NM_009700	Aqp4	aquaporin 4	1	1	0	1	1
NM_009743	Bcl2l1	Bcl2-like 1	1	0	1	1	1
NM_009829	Ccnd2	cyclin D2	1	0	1	1	1
NM_009896	Socs1	suppressor of cytokine signaling 1	1	0	1	1	1
NM_010026	Ddef1	development and differentiation enhancing	1	0	1	1	1
NM_010110	Efnb1	ephrin B1	1	0	1	1	1
NM_010140	Epha3	Eph receptor A3	1	0	1	1	1
NM_010177	Fasl	Fas ligand (TNF superfamily, member 6)	1	0	1	1	1
NM_010202	Fgf4	fibroblast growth factor 4	1	0	1	1	1
NM_010269	Gdap2	ganglioside-induced differentiation-associated-protein 2	1	1	0	1	1
NM_010318	Gng5	guanine nucleotide binding protein (G protein), gamma 5	1	0	1	1	1
NM_010441	Hmga2	high mobility group AT-hook 2	0	1	1	1	1
NM_010513	Igf1r	insulin-like growth factor I receptor	1	1	0	1	1
NM_010718	Limk2	LIM motif-containing protein kinase 2	1	1	0	1	1
NM_010788	Mecp2	methyl CpG binding protein 2	1	0	1	1	1
NM_010804	Mllt10	myeloid/lymphoid or mixed-lineage leukemia (trithorax homolog, Drosophila); translocated to, 10	1	0	1	1	1
NM_010811	Ndst2	N-deacetylase/N-sulfotransferase (heparan glucosaminyl) 2	1	0	1	1	1
NM_010937	Nras	neuroblastoma ras oncogene	0	1	1	1	1
NM_011116	Pld3	phospholipase D family, member 3	1	0	1	1	1
NM_011127	Prrx1	paired related homeobox 1	1	0	1	1	1
NM_011214	Ptpru	protein tyrosine phosphatase, receptor type, U	1	0	1	1	1
NM_011246	Rasgrp1	RAS guanyl releasing protein 1	1	0	1	1	1
NM_011262	Dpf2	D4, zinc and double PHD fingers family 2	1	0	1	1	1
NM_011374	St8sia1	ST8 alpha-N-acetyl-neuraminide alpha-2,8-sialyltransferase 1	1	0	1	1	1
NM_011386	Skil	SKI-like	1	0	1	1	1
NM_011537	Tbx5	T-box 5	1	0	1	1	1
NM_011566	Tead3	TEA domain family member 3	1	0	1	1	1
NM_011578	Tgfbr3	transforming growth factor, beta receptor III	1	1	0	1	1
NM_011673	Ugcg	UDP-glucose ceramide glucosyltransferase	1	0	1	1	1
NM_011682	Utrn	utrophin	1	1	0	1	1
NM_011848	Nek3	NIMA (never in mitosis gene a)-related expressed kinase 3	1	1	0	1	1
NM_011887	Scn11a	sodium channel, voltage-gated, type XI, alpha	1	0	1	1	1
NM_011945	Map3k1	mitogen-activated protein kinase kinase kinase 1	1	0	1	1	1
NM_011976	Sema4g	sema domain, immunoglobulin domain (Ig), transmembrane domain (TM) and short cytoplasmic domain, (semaphorin) 4G	1	0	1	1	1
NM_012038	Vsnl1	visinin-like 1	1	0	1	1	1
NM_013462	Adrb3	adrenergic receptor, beta 3	0	1	1	1	1
NM_013507	Eif4g2	eukaryotic translation initiation factor 4, gamma 2	1	0	1	1	1
NM_013526	Gdf6	growth differentiation factor 6	0	1	1	1	1
NM_013688	Tcte1	t-complex-associated testis expressed 1	1	1	0	1	1
NM_013753	X99384	cDNA sequence X99384	1	1	0	1	1
NM_013886	Hdgfrp3	hepatoma-derived growth factor, related protein 3	1	0	1	1	1
NM_013911	Fbxl12	F-box and leucine-rich repeat protein 12	1	1	0	1	1
NM_015775	Tmprss2	transmembrane protease, serine 2	1	0	1	1	1
NM_015781	Nap1l1	nucleosome assembly protein 1-like 1	1	0	1	1	1
NM_015806	Mapk6	mitogen-activated protein kinase 6	1	1	0	1	1
NM_015814	Dkk3	dickkopf homolog 3 (Xenopus laevis)	1	1	0	1	1
NM_016706	Coil	coilin	0	1	1	1	1
NM_016711	Tmod2	tropomodulin 2	1	0	1	1	1
NM_016768	Pbx3	pre B-cell leukemia transcription factor 3	0	1	1	1	1
NM_016783	Pgrmc1	progesterone receptor membrane component 1	1	0	1	1	1
NM_016859	Bysl	bystin-like	1	1	0	1	1
NM_016898	Cd164	CD164 antigen	1	0	1	1	1
NM_017463	Pbx2	pre B-cell leukemia transcription factor 2	1	0	1	1	1
NM_018757	Nme6	non-metastatic cells 6, protein expressed in (nucleoside-diphosphate kinase)	1	0	1	1	1
NM_018770	Cadm1	cell adhesion molecule 1	1	0	1	1	1
NM_018771	Gipc1	GIPC PDZ domain containing family, member 1	1	0	1	1	1
NM_019403	Rnf5	ring finger protein 5	1	0	1	1	1
NM_019637	Styx	phosphoserine/threonine/tyrosine interaction protein	1	0	1	1	1
NM_019689	Arid3b	AT rich interactive domain 3B (Bright like)	1	0	1	1	1
NM_019742	Tusc2	tumor suppressor candidate 2	1	0	1	1	1
NM_019794	Dnaja2	DnaJ (Hsp40) homolog, subfamily A, member 2	1	0	1	1	1
NM_019796	Syncrip	synaptotagmin binding, cytoplasmic RNA interacting protein	1	0	1	1	1
NM_019913	Txn2	thioredoxin 2	1	1	0	1	1
NM_019986	Habp4	hyaluronic acid binding protein 4	1	0	1	1	1
NM_020043	Nope	neighbor of Punc E11	1	0	1	1	1
NM_020283	B3galt1	UDP-Gal:betaGlcNAc beta 1,3-galactosyltransferase, polypeptide 1	1	0	1	1	1
NM_020505	Vav3	vav 3 oncogene	1	0	1	1	1
NM_020576	Psors1c2	psoriasis susceptibility 1 candidate 2 (human)	1	0	1	1	1
NM_021279	Wnt1	wingless-related MMTV integration site 1	1	0	1	1	1
NM_021362	Pappa	pregnancy-associated plasma protein A	1	0	1	1	1
NM_021504	Ngly1	N-glycanase 1	1	1	0	1	1
NM_021548	Arpp19	cAMP-regulated phosphoprotein 19	1	0	1	1	1
NM_022724	Suv39h2	suppressor of variegation 3-9 homolog 2 (Drosophila)	1	0	1	1	1
NM_022887	Tsc1	tuberous sclerosis 1	1	0	1	1	1
NM_023320	Plekho1	pleckstrin homology domain containing, family O member 1	1	0	1	1	1
NM_023336	Brd3	bromodomain containing 3	1	0	1	1	1
NM_023670	Igf2bp3	insulin-like growth factor 2 mRNA binding protein 3	0	1	1	1	1
NM_023742	Dtx2	deltex 2 homolog (Drosophila)	1	0	1	1	1
NM_024182	Riok3	RIO kinase 3 (yeast)	1	1	0	1	1
NM_024254	2410042D21Rik	RIKEN cDNA 2410042D21 gene	1	0	1	1	1
NM_024256	B3gat3	beta-1,3-glucuronyltransferase 3 (glucuronosyltransferase I)	1	1	0	1	1
NM_025283	Mobkl3	MOB1, Mps One Binder kinase activator-like 3 (yeast)	1	0	1	1	1
NM_025335	Tmem167	transmembrane protein 167	1	1	0	1	1
NM_025590	Acot11	acyl-CoA thioesterase 11	1	1	0	1	1
NM_025638	Gdpd1	glycerophosphodiester phosphodiesterase domain containing 1	1	0	1	1	1
NM_025693	Tmem41a	transmembrane protein 41a	1	0	1	1	1
NM_025824	Bzw1	basic leucine zipper and W2 domains 1	0	1	1	1	1
NM_025907	Mettl6	methyltransferase like 6	1	1	0	1	1
NM_025978	Ttc14	tetratricopeptide repeat domain 14	1	1	0	1	1
NM_026010	2610209A20Rik	RIKEN cDNA 2610209A20 gene	0	1	1	1	1
NM_026346	Fbxo32	F-box protein 32	1	0	1	1	1
NM_026367	Gpatch2	G patch domain containing 2	1	0	1	1	1
NM_026599	Cgnl1	cingulin-like 1	1	0	1	1	1
NM_026604	4921533L14Rik	RIKEN cDNA 4921533L14 gene	1	0	1	1	1
NM_026856	Zfp644	zinc finger protein 644	1	0	1	1	1
NM_026955	2200002K05Rik	RIKEN cDNA 2200002K05 gene	1	1	0	1	1
NM_027418	Mapk6	mitogen-activated protein kinase 6	1	1	0	1	1
NM_027421	Ints2	integrator complex subunit 2	0	1	1	1	1
NM_027530	Rufy3	RUN and FYVE domain containing 3	1	0	1	1	1
NM_027554	Usp38	ubiquitin specific peptidase 38	0	1	1	1	1
NM_027926	Cpa4	carboxypeptidase A4	1	0	1	1	1
NM_027968	Fbxo30	F-box protein 30	1	0	1	1	1
NM_028024	Nkiras2	NFKB inhibitor interacting Ras-like protein 2	1	0	1	1	1
NM_028070	Alkbh4	alkB, alkylation repair homolog 4 (E. coli)	1	1	0	1	1
NM_028335	Zfp248	zinc finger protein 248	0	1	1	1	1
NM_028459	Wasl	Wiskott-Aldrich syndrome-like (human)	1	0	1	1	1
NM_028762	Rbm19	RNA binding motif protein 19	1	1	0	1	1
NM_028802	Prei4	preimplantation protein 4	1	0	1	1	1
NM_028836	Ctbs	chitobiase, di-N-acetyl-	1	1	0	1	1
NM_028922	Ppapdc2	phosphatidic acid phosphatase type 2 domain containing 2	1	0	1	1	1
NM_029068	Snx16	sorting nexin 16	1	0	1	1	1
NM_029364	Gns	glucosamine (N-acetyl)-6-sulfatase	1	0	1	1	1
NM_029436	Klhl24	kelch-like 24 (Drosophila)	1	0	1	1	1
NM_029846	Atg16l1	autophagy-related 16-like 1 (yeast)	1	0	1	1	1
NM_029999	Lbh	limb-bud and heart	1	0	1	1	1
NM_030014	Hook1	hook homolog 1 (Drosophila)	1	0	1	1	1
NM_030168	4921505C17Rik	RIKEN cDNA 4921505C17 gene	1	0	1	1	1
NM_030225	Dlst	dihydrolipoamide S-succinyltransferase (E2 component of 2-oxo-glutarate complex)	1	0	1	1	1
NM_030705	Mesdc1	mesoderm development candidate 1	1	0	1	1	1
NM_030710	Slamf6	SLAM family member 6	1	1	0	1	1
NM_031251	Ctns	cystinosis, nephropathic	1	0	1	1	1
NM_031406	Slc12a9	solute carrier family 12 (potassium/chloride transporters), member 9	1	0	1	1	1
NM_031494	Zfp275	zinc finger protein 275	1	0	1	1	1
NM_032396	Kremen1	kringle containing transmembrane protein 1	1	0	1	1	1
NM_053103	Entpd7	ectonucleoside triphosphate diphosphohydrolase 7	1	1	0	1	1
NM_053107	Gpr45	G protein-coupled receptor 45	1	0	1	1	1
NM_053242	Foxp2	forkhead box P2	1	0	1	1	1
NM_054043	Msi2	Musashi homolog 2 (Drosophila)	1	0	1	1	1
NM_130447	Dusp16	dual specificity phosphatase 16	1	0	1	1	1
NM_130880	Otud7a	OTU domain containing 7A	1	0	1	1	1
NM_133195	Brunol4	bruno-like 4, RNA binding protein (Drosophila)	1	0	1	1	1
NM_133656	Crk	v-crk sarcoma virus CT10 oncogene homolog (avian)	1	0	1	1	1
NM_133716	Smap2	stromal membrane-associated GTPase-activating protein 2	1	1	0	1	1
NM_133750	3110048E14Rik	RIKEN cDNA 3110048E14 gene	1	0	1	1	1
NM_133792	Lypla3	lysophospholipase 3	1	0	1	1	1
NM_133808	Hdlbp	high density lipoprotein (HDL) binding protein	1	0	1	1	1
NM_133832	Rdh10	retinol dehydrogenase 10 (all-trans)	1	0	1	1	1
NM_134048	Cbll1	Casitas B-lineage lymphoma-like 1	1	1	0	1	1
NM_134050	Rab15	RAB15, member RAS oncogene family	1	0	1	1	1
NM_138598	D11Wsu99e	DNA segment, Chr 11, Wayne State University 99, expressed	1	0	1	1	1
NM_138648	Olr1	oxidized low density lipoprotein (lectin-like) receptor 1	1	0	1	1	1
NM_139226	Onecut3	one cut domain, family member 3	1	0	1	1	1
NM_144545	Eif3j	eukaryotic translation initiation factor 3, subunit J	1	0	1	1	1
NM_144873	Uhrf2	ubiquitin-like, containing PHD and RING finger domains 2	1	1	0	1	1
NM_145148	Frmd4b	FERM domain containing 4B	0	1	1	1	1
NM_145534	Btbd3	BTB (POZ) domain containing 3	1	0	1	1	1
NM_145551	Slc5a9	solute carrier family 5 (sodium/glucose cotransporter), member 9	1	1	0	1	1
NM_145833	Lin28	lin-28 homolog (C. elegans)	0	1	1	1	1
NM_145840	Rgs9bp	regulator of G-protein signalling 9 binding protein	1	0	1	1	1
NM_145857	Nod2	nucleotide-binding oligomerization domain containing 2	1	1	0	1	1
NM_145922	Kcnc4	potassium voltage gated channel, Shaw-related subfamily, member 4	1	0	1	1	1
NM_145930	AW549877	expressed sequence AW549877	1	0	1	1	1
NM_146126	Sord	sorbitol dehydrogenase	1	1	0	1	1
NM_146139	Vav3	vav 3 oncogene	1	0	1	1	1
NM_146175	Zfp282	zinc finger protein 282	0	1	1	1	1
NM_146241	Trhde	TRH-degrading enzyme	1	0	1	1	1
NM_146243	Actr2	ARP2 actin-related protein 2 homolog (yeast)	1	0	1	1	1
NM_001001176	Taf9b	TAF9B RNA polymerase II, TATA box binding protein (TBP)-associated factor	1	0	0	1	1
NM_001001180	BC066028	cDNA sequence BC066028	1	0	0	1	1
NM_001001183	Tmem204	transmembrane protein 204	1	0	0	1	1
NM_001001297	Thnsl1	threonine synthase-like 1 (bacterial)	1	0	0	1	1
NM_001001320	Tbx10	T-box 10	1	0	0	1	1
NM_001001881	2510009E07Rik	RIKEN cDNA 2510009E07 gene	1	0	0	1	1
NM_001001885	Tmem151a	transmembrane protein 151A	1	0	0	1	1
NM_001001932	Eea1	early endosome antigen 1	1	0	0	1	1
NM_001001982	A430105I19Rik	RIKEN cDNA A430105I19 gene	1	0	0	1	1
NM_001001984	Fbxl11	F-box and leucine-rich repeat protein 11	0	0	1	1	1
NM_001001985	Nat8l	N-acetyltransferase 8-like	1	0	0	1	1
NM_001001986	8430427H17Rik	RIKEN cDNA 8430427H17 gene	1	0	0	1	1
NM_001002240	Tdrd1	tudor domain containing 1	1	0	0	1	1
NM_001002241	Tdrd1	tudor domain containing 1	1	0	0	1	1
NM_001002764	Smg6	Smg-6 homolog, nonsense mediated mRNA decay factor (C. elegans)	1	0	0	1	1
NM_001002927	Penk1	preproenkephalin 1	1	0	0	1	1
NM_001003717	Osbpl8	oxysterol binding protein-like 8	1	0	0	1	1
NM_001003815	Epb4.1l1	erythrocyte protein band 4.1-like 1	1	0	0	1	1
NM_001003898	Tardbp	TAR DNA binding protein	1	0	0	1	1
NM_001003917	Atg9a	autophagy-related 9A (yeast)	0	0	1	1	1
NM_001003933	Rtn3	reticulon 3	1	0	0	1	1
NM_001003934	Rtn3	reticulon 3	1	0	0	1	1
NM_001003955	Rab11fip5	RAB11 family interacting protein 5 (class I)	1	0	0	1	1
NM_001004025	Ppp3r2	protein phosphatase 3, regulatory subunit B, alpha isoform (calcineurin B, type II)	1	0	0	1	1
NM_001004062	Crtc1	CREB regulated transcription coactivator 1	1	0	0	1	1
NM_001004143	Usp22	ubiquitin specific peptidase 22	1	0	0	1	1
NM_001004173	Sgpp2	sphingosine-1-phosphate phosphotase 2	1	0	0	1	1
NM_001004367	Cxxc4	CXXC finger 4	1	0	0	1	1
NM_001005248	Hps5	Hermansky-Pudlak syndrome 5 homolog (human)	1	0	0	1	1
NM_001005341	Ypel2	yippee-like 2 (Drosophila)	1	0	0	1	1
NM_001005423	Mreg	melanoregulin	1	0	0	1	1
NM_001005475	Iqsec2	IQ motif and Sec7 domain 2	1	0	0	1	1
NM_001005506	Txlna	taxilin alpha	1	0	0	1	1
NM_001005854	Gm609	gene model 609, (NCBI)	1	0	0	1	1
NM_001005868	Erbb2ip	Erbb2 interacting protein	1	0	0	1	1
NM_001006664	Epb4.1l1	erythrocyte protein band 4.1-like 1	1	0	0	1	1
NM_001007465	Rffl	ring finger and FYVE like domain containing protein	1	0	0	1	1
NM_001007570	Slc25a42	solute carrier family 25, member 42	1	0	0	1	1
NM_001007577	A630018P17Rik	RIKEN cDNA A630018P17 gene	1	0	0	1	1
NM_001008231	Daam2	dishevelled associated activator of morphogenesis 2	1	0	0	1	1
NM_001008420	Cdh12	cadherin 12	1	0	0	1	1
NM_001008424	Cdsn	corneodesmosin	1	0	0	1	1
NM_001008542	Mxi1	Max interacting protein 1	1	0	0	1	1
NM_001008543	Mxi1	Max interacting protein 1	1	0	0	1	1
NM_001008545	Tardbp	TAR DNA binding protein	1	0	0	1	1
NM_001008785	Kbtbd8	kelch repeat and BTB (POZ) domain containing 8	1	0	0	1	1
NM_001009818	2014-09-11	septin 11	1	0	0	1	1
NM_001009819	A3galt2	alpha 1,3-galactosyltransferase 2 (isoglobotriaosylceramide synthase)	1	0	0	1	1
NM_001009935	Txnip	thioredoxin interacting protein	1	0	0	1	1
NM_001009949	Mcart1	mitochondrial carrier triple repeat 1	1	0	0	1	1
NM_001010825	Ficd	FIC domain containing	1	0	0	1	1
NM_001010833	Mdc1	mediator of DNA damage checkpoint 1	1	0	0	1	1
NM_001010973	Hrh2	histamine receptor H2	1	0	0	1	1
NM_001012324	Ecm2	extracellular matrix protein 2, female organ and adipocyte specific	1	0	0	1	1
NM_001012450	Ankrd6	ankyrin repeat domain 6	1	0	0	1	1
NM_001012451	Ankrd6	ankyrin repeat domain 6	1	0	0	1	1
NM_001012477	Cxcl12	chemokine (C-X-C motif) ligand 12	1	0	0	1	1
NM_001013019	Lrrn4cl	LRRN4 C-terminal like	1	0	0	1	1
NM_001013362	Npcd	neuronal pentraxin with chromo domain	1	0	0	1	1
NM_001013377	E130306D19Rik	RIKEN cDNA E130306D19 gene	1	0	0	1	1
NM_001013378	Uspl1	ubiquitin specific peptidase like 1	0	0	1	1	1
NM_001013390	Scn4b	sodium channel, type IV, beta	1	0	0	1	1
NM_001013577	1110054O05Rik	RIKEN cDNA 1110054O05 gene	1	0	0	1	1
NM_001013580	Pard3	par-3 (partitioning defective 3) homolog (C. elegans)	1	0	0	1	1
NM_001013749	Tmem151b	transmembrane protein 151B	1	0	0	1	1
NM_001013777	Zfp488	zinc finger protein 488	1	0	0	1	1
NM_001013778	BC068110	cDNA sequence BC068110	1	0	0	1	1
NM_001013780	Slc25a34	solute carrier family 25, member 34	1	0	0	1	1
NM_001013786	Zfp187	zinc finger protein 187	1	0	0	1	1
NM_001013788	EG432743	predicted gene, EG432743	1	0	0	1	1
NM_001013793	AA388235	expressed sequence AA388235	1	0	0	1	1
NM_001013823	OTTMUSG00000002196	predicted gene, OTTMUSG00000002196	1	0	0	1	1
NM_001014761	Scn2b	sodium channel, voltage-gated, type II, beta	1	0	0	1	1
NM_001014974	Ttll4	tubulin tyrosine ligase-like family, member 4	0	0	1	1	1
NM_001015046	Garnl4	GTPase activating RANGAP domain-like 4	1	0	0	1	1
NM_001017362	Arid3c	AT rich interactive domain 3C (BRIGHT-like)	1	0	0	1	1
NM_001017407	1700021K02Rik	RIKEN cDNA 1700021K02 gene	1	0	0	1	1
NM_001017409	1700021K02Rik	RIKEN cDNA 1700021K02 gene	1	0	0	1	1
NM_001017426	Jmjd3	jumonji domain containing 3	1	0	0	1	1
NM_001017427	Rasef	RAS and EF hand domain containing	1	0	0	1	1
NM_001017441	1700021K02Rik	RIKEN cDNA 1700021K02 gene	1	0	0	1	1
NM_001024205	Nufip2	nuclear fragile X mental retardation protein interacting protein 2	1	0	0	1	1
NM_001024468	Bcat1	branched chain aminotransferase 1, cytosolic	1	0	0	1	1
NM_001024504	Dcun1d2	DCN1, defective in cullin neddylation 1, domain containing 2 (S. cerevisiae)	1	0	0	1	1
NM_001024526	Larp4	La ribonucleoprotein domain family, member 4	1	0	0	1	1
NM_001024604	Ankrd28	ankyrin repeat domain 28	1	0	0	1	1
NM_001024606	4833426J09Rik	RIKEN cDNA 4833426J09 gene	1	0	0	1	1
NM_001024705	Prpmp5	proline-rich protein MP5	1	0	0	1	1
NM_001024707	Lrp3	low density lipoprotein receptor-related protein 3	1	0	0	1	1
NM_001024717	Gal3st3	galactose-3-O-sulfotransferase 3	1	0	0	1	1
NM_001024720	Hmcn1	hemicentin 1	1	0	0	1	1
NM_001024726	Zfp607	zinc finger proten 607	1	0	0	1	1
NM_001024837	Adarb1	adenosine deaminase, RNA-specific, B1	1	0	0	1	1
NM_001024856	Ttbk2	tau tubulin kinase 2	1	0	0	1	1
NM_001024857	Ttbk2	tau tubulin kinase 2	1	0	0	1	1
NM_001024922	Ddx49	DEAD (Asp-Glu-Ala-Asp) box polypeptide 49	0	0	1	1	1
NM_001024926	Cyb5d2	cytochrome b5 domain containing 2	1	0	0	1	1
NM_001024927	Pitpnm3	PITPNM family member 3	1	0	0	1	1
NM_001024950	Zfp563	zinc finger protein 563	1	0	0	1	1
NM_001025163	Zfp78	zinc finger protein 78	1	0	0	1	1
NM_001025251	Mbp	myelin basic protein	1	0	0	1	1
NM_001025254	Mbp	myelin basic protein	1	0	0	1	1
NM_001025255	Mbp	myelin basic protein	1	0	0	1	1
NM_001025256	Mbp	myelin basic protein	1	0	0	1	1
NM_001025259	Mbp	myelin basic protein	1	0	0	1	1
NM_001025296	Dffa	DNA fragmentation factor, alpha subunit	1	0	0	1	1
NM_001025305	Tcfap2b	transcription factor AP-2 beta	1	0	0	1	1
NM_001025307	Stx3	syntaxin 3	1	0	0	1	1
NM_001025310	St6galnac6	ST6 (alpha-N-acetyl-neuraminyl-2,3-beta-galactosyl-1,3)-N-acetylgalactosaminide alpha-2,6-sialyltransferase 6	1	0	0	1	1
NM_001025313	Tapbp	TAP binding protein	1	0	0	1	1
NM_001025379	Sema3g	sema domain, immunoglobulin domain (Ig), short basic domain, secreted, (semaphorin) 3G	1	0	0	1	1
NM_001025381	Gpr17	G protein-coupled receptor 17	1	0	0	1	1
NM_001025427	Hmga1	high mobility group AT-hook 1	1	0	0	1	1
NM_001025438	Camk2d	calcium/calmodulin-dependent protein kinase II, delta	1	0	0	1	1
NM_001025439	Camk2d	calcium/calmodulin-dependent protein kinase II, delta	1	0	0	1	1
NM_001025444	Aptx	aprataxin	1	0	0	1	1
NM_001025565	Lhx9	LIM homeobox protein 9	1	0	0	1	1
NM_001025566	Chka	choline kinase alpha	1	0	0	1	1
NM_001025567	Dmbx1	diencephalon/mesencephalon homeobox 1	1	0	0	1	1
NM_001025571	Sh2d2a	SH2 domain protein 2A	1	0	0	1	1
NM_001025581	Kcnc2	potassium voltage gated channel, Shaw-related subfamily, member 2	1	0	0	1	1
NM_001025590	Kcnj6	potassium inwardly-rectifying channel, subfamily J, member 6	1	0	0	1	1
NM_001025599	Trim26	tripartite motif-containing 26	1	0	0	1	1
NM_001025602	Il1rl1	interleukin 1 receptor-like 1	1	0	0	1	1
NM_001025608	D4Ertd22e	DNA segment, Chr 4, ERATO Doi 22, expressed	1	0	0	1	1
NM_001025612	Snx22	sorting nexin 22	1	0	0	1	1
NM_001025613	Otud7b	OTU domain containing 7B	1	0	0	1	1
NM_001025614	Otud7b	OTU domain containing 7B	1	0	0	1	1
NM_001025615	Ccdc50	coiled-coil domain containing 50	1	0	0	1	1
NM_001026214	Entpd5	ectonucleoside triphosphate diphosphohydrolase 5	1	0	0	1	1
NM_001029842	Slc16a6	solute carrier family 16 (monocarboxylic acid transporters), member 6	1	0	0	1	1
NM_001029844	Vrk1	vaccinia related kinase 1	1	0	0	1	1
NM_001029872	Itgad	integrin, alpha D	1	0	0	1	1
NM_001029890	Mex3a	mex3 homolog A (C. elegans)	0	0	1	1	1
NM_001029936	Specc1	sperm antigen with calponin homology and coiled-coil domains 1	1	0	0	1	1
NM_001029994	Zc3h18	zinc finger CCCH-type containing 18	1	0	0	1	1
NM_001031814	2610207I05Rik	RIKEN cDNA 2610207I05 gene	1	0	0	1	1
NM_001032413	Pear1	platelet endothelial aggregation receptor 1	1	0	0	1	1
NM_001032414	Pear1	platelet endothelial aggregation receptor 1	1	0	0	1	1
NM_001033136	1200015F23Rik	RIKEN cDNA 1200015F23 gene	1	0	0	1	1
NM_001033145	1190002N15Rik	RIKEN cDNA 1190002N15 gene	1	0	0	1	1
NM_001033156	Fbxo33	F-box protein 33	1	0	0	1	1
NM_001033158	Rasl12	RAS-like, family 12	1	0	0	1	1
NM_001033159	Zfp597	zinc finger protein 597	1	0	0	1	1
NM_001033163	Abhd9	abhydrolase domain containing 9	1	0	0	1	1
NM_001033167	Slc22a23	solute carrier family 22, member 23	1	0	0	1	1
NM_001033175	Cln6	ceroid-lipofuscinosis, neuronal 6	1	0	0	1	1
NM_001033177	Krt76	keratin 76	1	0	0	1	1
NM_001033209	Xylb	xylulokinase homolog (H. influenzae)	1	0	0	1	1
NM_001033221	AU023871	expressed sequence AU023871	1	0	0	1	1
NM_001033222	Pdzd8	PDZ domain containing 8	1	0	0	1	1
NM_001033234	Gm9	gene model 9, (NCBI)	1	0	0	1	1
NM_001033238	Cblb	Casitas B-lineage lymphoma b	1	0	0	1	1
NM_001033250	Lemd1	LEM domain containing 1	1	0	0	1	1
NM_001033263	Centg1	centaurin, gamma 1	1	0	0	1	1
NM_001033270	Slc4a7	solute carrier family 4, sodium bicarbonate cotransporter, member 7	1	0	0	1	1
NM_001033308	BC013712	cDNA sequence BC013712	1	0	0	1	1
NM_001033315	Hipk4	homeodomain interacting protein kinase 4	1	0	0	1	1
NM_001033321	4932417I16Rik	RIKEN cDNA 4932417I16 gene	1	0	0	1	1
NM_001033328	BC023829	cDNA sequence BC023829	1	0	0	1	1
NM_001033337	AW124722	expressed sequence AW124722	1	0	0	1	1
NM_001033347	D430041D05Rik	RIKEN cDNA D430041D05 gene	1	0	0	1	1
NM_001033354	Iqsec3	IQ motif and Sec7 domain 3	1	0	0	1	1
NM_001033361	Pgr15l	G protein-coupled receptor 15-like	1	0	0	1	1
NM_001033382	Cacna2d4	calcium channel, voltage-dependent, alpha 2/delta subunit 4	1	0	0	1	1
NM_001033383	6430526N21Rik	RIKEN cDNA 6430526N21 gene	1	0	0	1	1
NM_001033391	A130090K04Rik	RIKEN cDNA A130090K04 gene	1	0	0	1	1
NM_001033393	Tmem104	transmembrane protein 104	1	0	0	1	1
NM_001033399	Gfod1	glucose-fructose oxidoreductase domain containing 1	1	0	0	1	1
NM_001033419	Ceacam16	CEA-related cell adhesion molecule 16	1	0	0	1	1
NM_001033422	Thoc2	THO complex 2	1	0	0	1	1
NM_001033426	Gm851	gene model 851, (NCBI)	1	0	0	1	1
NM_001033427	Lyg2	lysozyme G-like 2	1	0	0	1	1
NM_001033451	Zfp408	zinc finger protein 408	1	0	0	1	1
NM_001033454	AI427809	expressed sequence AI427809	1	0	0	1	1
NM_001033457	Gm1040	gene model 1040, (NCBI)	1	0	0	1	1
NM_001033469	Foxr1	forkhead box R1	1	0	0	1	1
NM_001033474	4921506J03Rik	RIKEN cDNA 4921506J03 gene	1	0	0	1	1
NM_001033484	Iqgap3	IQ motif containing GTPase activating protein 3	1	0	0	1	1
NM_001033535	Tnfaip8l3	tumor necrosis factor, alpha-induced protein 8-like 3	1	0	0	1	1
NM_001033538	Cass4	Cas scaffolding protein family member 4	1	0	0	1	1
NM_001033600	Acsl4	acyl-CoA synthetase long-chain family member 4	1	0	0	1	1
NM_001033633	Slc2a13	solute carrier family 2 (facilitated glucose transporter), member 13	1	0	0	1	1
NM_001033770	Gm904	gene model 904, (NCBI)	1	0	0	1	1
NM_001033780	I830077J02Rik	RIKEN cDNA I830077J02 gene	1	0	0	1	1
NM_001033789	EG545253	predicted gene, EG545253	1	0	0	1	1
NM_001033979	Ldlrad2	low density lipoprotein receptor A domain containing 2	1	0	0	1	1
NM_001034858	Armc2	armadillo repeat containing 2	1	0	0	1	1
NM_001034863	Tmem136	transmembrane protein 136	1	0	0	1	1
NM_001034868	Mrgprx2	MAS-related GPR, member X2	1	0	0	1	1
NM_001034882	EG432879	predicted gene, EG432879	1	0	0	1	1
NM_001034885	Pnpla1	patatin-like phospholipase domain containing 1	1	0	0	1	1
NM_001034887	OTTMUSG00000012686	predicted gene, OTTMUSG00000012686	1	0	0	1	1
NM_001034899	EG545391	predicted gene, EG545391	1	0	0	1	1
NM_001034900	Zfp345	zinc finger protein 345	1	0	0	1	1
NM_001034902	EG545861	predicted gene, EG545861	1	0	0	1	1
NM_001034905	EG546038	predicted gene, EG546038	1	0	0	1	1
NM_001034962	Sorbs1	sorbin and SH3 domain containing 1	1	0	0	1	1
NM_001034963	Sorbs1	sorbin and SH3 domain containing 1	1	0	0	1	1
NM_001034964	Sorbs1	sorbin and SH3 domain containing 1	1	0	0	1	1
NM_001035122	Golm1	golgi membrane protein 1	1	0	0	1	1
NM_001035231	Zfp748	zinc finger protein 748	1	0	0	1	1
NM_001035246	Trpm3	transient receptor potential cation channel, subfamily M, member 3	1	0	0	1	1
NM_001035531	Adrbk2	adrenergic receptor kinase, beta 2	1	0	0	1	1
NM_001036684	Atp2b2	ATPase, Ca++ transporting, plasma membrane 2	1	0	0	1	1
NM_001037134	Ccne2	cyclin E2	1	0	0	1	1
NM_001037136	Centg2	centaurin, gamma 2	0	0	1	1	1
NM_001037759	Sgk3	serum/glucocorticoid regulated kinase 3	1	0	0	1	1
NM_001037842	Cml3	camello-like 3	1	0	0	1	1
NM_001037877	Tcf25	transcription factor 25 (basic helix-loop-helix)	1	0	0	1	1
NM_001037914	EG622408	predicted gene, EG622408	1	0	0	1	1
NM_001037917	EG622976	predicted gene, EG622976	1	0	0	1	1
NM_001038230	Anapc11	anaphase promoting complex subunit 11 homolog (yeast)	1	0	0	1	1
NM_001038492	Ctsa	cathepsin A	1	0	0	1	1
NM_001038500	EG619517	predicted gene, EG619517	1	0	0	1	1
NM_001038587	Adar	adenosine deaminase, RNA-specific	1	0	0	1	1
NM_001038592	Glrx2	glutaredoxin 2 (thioltransferase)	1	0	0	1	1
NM_001038593	Glrx2	glutaredoxin 2 (thioltransferase)	1	0	0	1	1
NM_001038594	Glrx2	glutaredoxin 2 (thioltransferase)	1	0	0	1	1
NM_001038602	Marveld2	MARVEL (membrane-associating) domain containing 2	1	0	0	1	1
NM_001038604	Clec5a	C-type lectin domain family 5, member a	1	0	0	1	1
NM_001038621	Rabgap1l	RAB GTPase activating protein 1-like	1	0	0	1	1
NM_001038627	Smurf1	SMAD specific E3 ubiquitin protein ligase 1	1	0	0	1	1
NM_001038635	Stk35	serine/threonine kinase 35	1	0	0	1	1
NM_001038642	Ets1	E26 avian leukemia oncogene 1, 5" domain	1	0	0	1	1
NM_001038651	E130120F12Rik	RIKEN cDNA E130120F12 gene	1	0	0	1	1
NM_001038655	Gng7	guanine nucleotide binding protein (G protein), gamma 7	1	0	0	1	1
NM_001038658	Faim2	Fas apoptotic inhibitory molecule 2	1	0	0	1	1
NM_001038699	Fn3k	fructosamine 3 kinase	1	0	0	1	1
NM_001038703	Gpr146	G protein-coupled receptor 146	1	0	0	1	1
NM_001038839	P2rx7	purinergic receptor P2X, ligand-gated ion channel, 7	1	0	0	1	1
NM_001038846	Rcsd1	RCSD domain containing 1	1	0	0	1	1
NM_001038990	Ids	iduronate 2-sulfatase	1	0	0	1	1
NM_001038991	Ids	iduronate 2-sulfatase	1	0	0	1	1
NM_001038993	Rnf38	ring finger protein 38	0	0	1	1	1
NM_001039048	Trim63	tripartite motif-containing 63	1	0	0	1	1
NM_001039050	Pkib	protein kinase inhibitor beta, cAMP dependent, testis specific	1	0	0	1	1
NM_001039051	Pkib	protein kinase inhibitor beta, cAMP dependent, testis specific	1	0	0	1	1
NM_001039052	Pkib	protein kinase inhibitor beta, cAMP dependent, testis specific	1	0	0	1	1
NM_001039053	Pkib	protein kinase inhibitor beta, cAMP dependent, testis specific	1	0	0	1	1
NM_001039055	Pofut1	protein O-fucosyltransferase 1	1	0	0	1	1
NM_001039056	Kcnj15	potassium inwardly-rectifying channel, subfamily J, member 15	1	0	0	1	1
NM_001039057	Kcnj15	potassium inwardly-rectifying channel, subfamily J, member 15	1	0	0	1	1
NM_001039059	Klhl15	kelch-like 15 (Drosophila)	1	0	0	1	1
NM_001039086	Rapgef1	Rap guanine nucleotide exchange factor (GEF) 1	1	0	0	1	1
NM_001039087	Rapgef1	Rap guanine nucleotide exchange factor (GEF) 1	1	0	0	1	1
NM_001039089	Sel1l	sel-1 suppressor of lin-12-like (C. elegans)	1	0	0	1	1
NM_001039092	Tom1l2	target of myb1-like 2 (chicken)	1	0	0	1	1
NM_001039126	Asb1	ankyrin repeat and SOCS box-containing protein 1	1	0	0	1	1
NM_001039149	Cd226	CD226 antigen	1	0	0	1	1
NM_001039157	Ube2j2	ubiquitin-conjugating enzyme E2, J2 homolog (yeast)	1	0	0	1	1
NM_001039158	Ube2j2	ubiquitin-conjugating enzyme E2, J2 homolog (yeast)	1	0	0	1	1
NM_001039168	D11Bwg0517e	DNA segment, Chr 11, Brigham & Women"s Genetics 0517 expressed	1	0	0	1	1
NM_001039179	Bicd2	bicaudal D homolog 2 (Drosophila)	1	0	0	1	1
NM_001039180	Bicd2	bicaudal D homolog 2 (Drosophila)	1	0	0	1	1
NM_001039181	Npr3	natriuretic peptide receptor 3	1	0	0	1	1
NM_001039185	Ceacam1	CEA-related cell adhesion molecule 1	1	0	0	1	1
NM_001039186	Ceacam1	CEA-related cell adhesion molecule 1	1	0	0	1	1
NM_001039187	Ceacam1	CEA-related cell adhesion molecule 1	1	0	0	1	1
NM_001039200	C230096C10Rik	RIKEN cDNA C230096C10 gene	1	0	0	1	1
NM_001039223	OTTMUSG00000015762	predicted gene, OTTMUSG00000015762	1	0	0	1	1
NM_001039240	631784	predicted gene, 631784	1	0	0	1	1
NM_001039356	Hmga1	high mobility group AT-hook 1	1	0	0	1	1
NM_001039389	Wdr37	WD repeat domain 37	1	0	0	1	1
NM_001039394	Rab43	RAB43, member RAS oncogene family	1	0	0	1	1
NM_001039482	Klhl20	kelch-like 20 (Drosophila)	1	0	0	1	1
NM_001039483	Tmco1	transmembrane and coiled-coil domains 1	1	0	0	1	1
NM_001039484	Kcnj10	potassium inwardly-rectifying channel, subfamily J, member 10	1	0	0	1	1
NM_001039493	Plekhm3	pleckstrin homology domain containing, family M, member 3	1	0	0	1	1
NM_001039515	Arl4a	ADP-ribosylation factor-like 4A	1	0	0	1	1
NM_001039520	Dnm2	dynamin 2	1	0	0	1	1
NM_001039530	Parp14	poly (ADP-ribose) polymerase family, member 14	1	0	0	1	1
NM_001039532	Zfp784	zinc finger protein 784	1	0	0	1	1
NM_001039537	Lif	leukemia inhibitory factor	1	0	0	1	1
NM_001039551	Cnnm3	cyclin M3	1	0	0	1	1
NM_001039554	Angptl7	angiopoietin-like 7	1	0	0	1	1
NM_001039644	Edem3	ER degradation enhancer, mannosidase alpha-like 3	1	0	0	1	1
NM_001039939	Asxl1	additional sex combs like 1 (Drosophila)	1	0	0	1	1
NM_001039951	Zfp606	zinc finger protein 606	1	0	0	1	1
NM_001040026	Sco1	SCO cytochrome oxidase deficient homolog 1 (yeast)	1	0	0	1	1
NM_001040106	Aak1	AP2 associated kinase 1	1	0	0	1	1
NM_001040130	Tmem141	transmembrane protein 141	1	0	0	1	1
NM_001040131	Eif4g2	eukaryotic translation initiation factor 4, gamma 2	1	0	0	1	1
NM_001040396	2810407C02Rik	RIKEN cDNA 2810407C02 gene	1	0	0	1	1
NM_001040426	Thsd4	thrombospondin, type I, domain containing 4	1	0	0	1	1
NM_001040611	Peg10	paternally expressed 10	1	0	0	1	1
NM_001040682	Clmn	calmin	1	0	0	1	1
NM_001040689	Rspo4	R-spondin family, member 4	1	0	0	1	1
NM_001042408	Txnl4a	thioredoxin-like 4A	1	0	0	1	1
NM_001042484	Golga7	golgi autoantigen, golgin subfamily a, 7	1	0	0	1	1
NM_001042487	Dlgap4	discs, large homolog-associated protein 4 (Drosophila)	1	0	0	1	1
NM_001042488	Dlgap4	discs, large homolog-associated protein 4 (Drosophila)	1	0	0	1	1
NM_001042558	Apaf1	apoptotic peptidase activating factor 1	1	0	0	1	1
NM_001042592	Arrdc4	arrestin domain containing 4	1	0	0	1	1
NM_001042671	Prei4	preimplantation protein 4	1	0	0	1	1
NM_001042707	Ilf3	interleukin enhancer binding factor 3	1	0	0	1	1
NM_001042710	Prssl1	protease, serine-like 1	1	0	0	1	1
NM_001042715	Ccdc135	coiled-coil domain containing 135	1	0	0	1	1
NM_001042752	Neo1	neogenin	1	0	0	1	1
NM_001043322	Fmn1	formin 1	1	0	0	1	1
NM_001044386	Zfx	zinc finger protein X-linked	1	0	0	1	1
NM_001044699	Zfp2	zinc finger protein 2	1	0	0	1	1
NM_001044700	Zfp2	zinc finger protein 2	1	0	0	1	1
NM_001044718	Zfp41	zinc finger protein 41	1	0	0	1	1
NM_001044720	Abcc9	ATP-binding cassette, sub-family C (CFTR/MRP), member 9	1	0	0	1	1
NM_001044740	Slc7a2	solute carrier family 7 (cationic amino acid transporter, y+ system), member 2	1	0	0	1	1
NM_001044750	Banf2	barrier to autointegration factor 2	1	0	0	1	1
NM_001044751	Hsd11b1	hydroxysteroid 11-beta dehydrogenase 1	1	0	0	1	1
NM_001045482	Rbak	RB-associated KRAB repressor	1	0	0	1	1
NM_001045486	Zfp180	zinc finger protein 180	1	0	0	1	1
NM_001045516	4933404M19Rik	RIKEN cDNA 4933404M19 gene	1	0	0	1	1
NM_001045520	Clint1	clathrin interactor 1	1	0	0	1	1
NM_001045536	Zzef1	zinc finger, ZZ-type with EF hand domain 1	1	0	0	1	1
NM_001045538	547127	predicted gene, 547127	1	0	0	1	1
NM_001045540	OTTMUSG00000005523	predicted gene, OTTMUSG00000005523	1	0	0	1	1
NM_001048054	Dusp16	dual specificity phosphatase 16	1	0	0	1	1
NM_001048189	4931433A01Rik	RIKEN cDNA 4931433A01 gene	1	0	0	1	1
NM_001048227	Dbndd2	dysbindin (dystrobrevin binding protein 1) domain containing 2	1	0	0	1	1
NM_001048229	Dbndd2	dysbindin (dystrobrevin binding protein 1) domain containing 2	1	0	0	1	1
NM_001048267	Tnpo1	transportin 1	1	0	0	1	1
NM_001076681	1810012P15Rik	RIKEN cDNA 1810012P15 gene	1	0	0	1	1
NM_001076791	9630025I21Rik	RIKEN cDNA 9630025I21 gene	1	0	0	1	1
NM_001077184	Bsg	basigin	1	0	0	1	1
NM_001077265	Hnrnpd	heterogeneous nuclear ribonucleoprotein D	1	0	0	1	1
NM_001077266	Hnrnpd	heterogeneous nuclear ribonucleoprotein D	1	0	0	1	1
NM_001077354	C77370	expressed sequence C77370	1	0	0	1	1
NM_001077360	Git2	G protein-coupled receptor kinase-interactor 2	1	0	0	1	1
NM_001077363	Ptbp1	polypyrimidine tract binding protein 1	1	0	0	1	1
NM_001077403	Nrp2	neuropilin 2	1	0	0	1	1
NM_001077404	Nrp2	neuropilin 2	1	0	0	1	1
NM_001077405	Nrp2	neuropilin 2	1	0	0	1	1
NM_001077496	Evi2b	ecotropic viral integration site 2b	1	0	0	1	1
NM_001077499	Scn8a	sodium channel, voltage-gated, type VIII, alpha	1	0	0	1	1
NM_001077508	Tnfrsf9	tumor necrosis factor receptor superfamily, member 9	1	0	0	1	1
NM_001077509	Tnfrsf9	tumor necrosis factor receptor superfamily, member 9	1	0	0	1	1
NM_001077636	Pigw	phosphatidylinositol glycan anchor biosynthesis, class W	1	0	0	1	1
NM_001077707	Shprh	SNF2 histone linker PHD RING helicase	1	0	0	1	1
NM_001078167	Sfrs1	splicing factor, arginine/serine-rich 1 (ASF/SF2)	1	0	0	1	1
NM_001079822	Tcf3	transcription factor 3	1	0	0	1	1
NM_001079830	Trim33	tripartite motif-containing 33	1	0	0	1	1
NM_001079844	Gpc6	glypican 6	1	0	0	1	1
NM_001079876	Gas2l3	growth arrest-specific 2 like 3	1	0	0	1	1
NM_001079909	Fgfr1	fibroblast growth factor receptor 1	1	0	0	1	1
NM_001080129	Tmpo	thymopoietin	1	0	0	1	1
NM_001080131	Tmpo	thymopoietin	1	0	0	1	1
NM_001080132	Tmpo	thymopoietin	1	0	0	1	1
NM_001080134	Tmpo	thymopoietin	1	0	0	1	1
NM_001080381	6330500D04Rik	RIKEN cDNA 6330500D04 gene	1	0	0	1	1
NM_001080557	Vamp1	vesicle-associated membrane protein 1	1	0	0	1	1
NM_001080755	Zzz3	zinc finger, ZZ domain containing 3	1	0	0	1	1
NM_001080774	Myo1c	myosin IC	1	0	0	1	1
NM_001080775	Myo1c	myosin IC	1	0	0	1	1
NM_001080781	1700029H14Rik	RIKEN cDNA 1700029H14 gene	1	0	0	1	1
NM_001080798	Aff1	AF4/FMR2 family, member 1	1	0	0	1	1
NM_001080813	Rab11fip1	RAB11 family interacting protein 1 (class I)	1	0	0	1	1
NM_001080814	Fat3	FAT tumor suppressor homolog 3 (Drosophila)	1	0	0	1	1
NM_001080924	Znrf3	zinc and ring finger 3	1	0	0	1	1
NM_001080927	Rbpj	recombination signal binding protein for immunoglobulin kappa J region	1	0	0	1	1
NM_001080928	Rbpj	recombination signal binding protein for immunoglobulin kappa J region	1	0	0	1	1
NM_001080929	Cdr2l	cerebellar degeneration-related protein 2-like	1	0	0	1	1
NM_001080930	Atxn1l	ataxin 1-like	1	0	0	1	1
NM_001080948	Larp4	La ribonucleoprotein domain family, member 4	1	0	0	1	1
NM_001080949	Ttc5	tetratricopeptide repeat domain 5	1	0	0	1	1
NM_001080979	Tead4	TEA domain family member 4	1	0	0	1	1
NM_001081007	Zfp382	zinc finger protein 382	1	0	0	1	1
NM_001081011	Srgap2	SLIT-ROBO Rho GTPase activating protein 2	1	0	0	1	1
NM_001081020	Adamts6	a disintegrin-like and metallopeptidase (reprolysin type) with thrombospondin type 1 motif, 6	1	0	0	1	1
NM_001081021	Zfp780b	zinc finger protein 780B	1	0	0	1	1
NM_001081022	D430042O09Rik	RIKEN cDNA D430042O09 gene	1	0	0	1	1
NM_001081049	Mll1	myeloid/lymphoid or mixed-lineage leukemia 1	1	0	0	1	1
NM_001081051	D130043K22Rik	RIKEN cDNA D130043K22 gene	1	0	0	1	1
NM_001081056	Xpot	exportin, tRNA (nuclear export receptor for tRNAs)	1	0	0	1	1
NM_001081064	Pdzd2	PDZ domain containing 2	1	0	0	1	1
NM_001081068	Zfp294	zinc finger protein 294	1	0	0	1	1
NM_001081071	Lycat	lysocardiolipin acyltransferase	1	0	0	1	1
NM_001081073	Cep76	centrosomal protein 76	1	0	0	1	1
NM_001081074	A1cf	APOBEC1 complementation factor	1	0	0	1	1
NM_001081086	Ppig	peptidyl-prolyl isomerase G (cyclophilin G)	1	0	0	1	1
NM_001081087	Kbtbd10	kelch repeat and BTB (POZ) domain containing 10	1	0	0	1	1
NM_001081098	Zfp362	zinc finger protein 362	1	0	0	1	1
NM_001081101	4933407H18Rik	RIKEN cDNA 4933407H18 gene	1	0	0	1	1
NM_001081109	Lmtk2	lemur tyrosine kinase 2	1	0	0	1	1
NM_001081114	Clip3	CAP-GLY domain containing linker protein 3	1	0	0	1	1
NM_001081116	Arhgef17	Rho guanine nucleotide exchange factor (GEF) 17	1	0	0	1	1
NM_001081118	AA673488	expressed sequence AA673488	1	0	0	1	1
NM_001081131	Dhtkd1	dehydrogenase E1 and transketolase domain containing 1	1	0	0	1	1
NM_001081135	Prrg3	proline rich Gla (G-carboxyglutamic acid) 3 (transmembrane)	1	0	0	1	1
NM_001081141	Gabbr2	gamma-aminobutyric acid (GABA) B receptor 2	1	0	0	1	1
NM_001081151	Gan	giant axonal neuropathy	1	0	0	1	1
NM_001081156	2300002D11Rik	RIKEN cDNA 2300002D11 gene	1	0	0	1	1
NM_001081164	Otud4	OTU domain containing 4	1	0	0	1	1
NM_001081166	Phf21b	PHD finger protein 21B	1	0	0	1	1
NM_001081170	Pacs2	phosphofurin acidic cluster sorting protein 2	1	0	0	1	1
NM_001081180	Spink5	serine peptidase inhibitor, Kazal type 5	1	0	0	1	1
NM_001081183	1110037F02Rik	RIKEN cDNA 1110037F02 gene	1	0	0	1	1
NM_001081191	Eml5	echinoderm microtubule associated protein like 5	1	0	0	1	1
NM_001081203	Sbno1	sno, strawberry notch homolog 1 (Drosophila)	1	0	0	1	1
NM_001081204	B3galtl	beta 1,3-galactosyltransferase-like	1	0	0	1	1
NM_001081213	Ermp1	endoplasmic reticulum metallopeptidase 1	1	0	0	1	1
NM_001081216	Phip	pleckstrin homology domain interacting protein	1	0	0	1	1
NM_001081218	Hcfc2	host cell factor C2	1	0	0	1	1
NM_001081220	Gpr179	G protein-coupled receptor 179	1	0	0	1	1
NM_001081224	Prr16	proline rich 16	1	0	0	1	1
NM_001081225	6030443O07Rik	RIKEN cDNA 6030443O07 gene	1	0	0	1	1
NM_001081227	6330403A02Rik	RIKEN cDNA 6330403A02 gene	1	0	0	1	1
NM_001081229	Tsc22d2	TSC22 domain family 2	1	0	0	1	1
NM_001081231	Lhfpl3	lipoma HMGIC fusion partner-like 3	1	0	0	1	1
NM_001081236	2410131K14Rik	RIKEN cDNA 2410131K14 gene	1	0	0	1	1
NM_001081242	Tln2	talin 2	1	0	0	1	1
NM_001081251	Pbrm1	polybromo 1	1	0	0	1	1
NM_001081258	Kif14	kinesin family member 14	1	0	0	1	1
NM_001081260	Tnks1bp1	tankyrase 1 binding protein 1	1	0	0	1	1
NM_001081268	BC039632	cDNA sequence BC039632	1	0	0	1	1
NM_001081269	Whsc1l1	Wolf-Hirschhorn syndrome candidate 1-like 1 (human)	1	0	0	1	1
NM_001081276	Clasp1	CLIP associating protein 1	1	0	0	1	1
NM_001081277	Ak5	adenylate kinase 5	1	0	0	1	1
NM_001081295	4631416L12Rik	RIKEN cDNA 4631416L12 gene	1	0	0	1	1
NM_001081304	Atf6	activating transcription factor 6	1	0	0	1	1
NM_001081310	2010003H20Rik	RIKEN cDNA 2010003H20 gene	1	0	0	1	1
NM_001081315	Brpf3	bromodomain and PHD finger containing, 3	1	0	0	1	1
NM_001081320	Cyb561d1	cytochrome b-561 domain containing 1	1	0	0	1	1
NM_001081324	Neto2	neuropilin (NRP) and tolloid (TLL)-like 2	1	0	0	1	1
NM_001081326	Agl	amylo-1,6-glucosidase, 4-alpha-glucanotransferase	1	0	0	1	1
NM_001081333	Plekhg4	pleckstrin homology domain containing, family G (with RhoGef domain) member 4	1	0	0	1	1
NM_001081344	Stxbp5	syntaxin binding protein 5 (tomosyn)	1	0	0	1	1
NM_001081348	Hecw1	HECT, C2 and WW domain containing E3 ubiquitin protein ligase 1	1	0	0	1	1
NM_001081350	Nol8	nucleolar protein 8	1	0	0	1	1
NM_001081366	Vps8	vacuolar protein sorting 8 homolog (S. cerevisiae)	1	0	0	1	1
NM_001081367	Kctd17	potassium channel tetramerisation domain containing 17	1	0	0	1	1
NM_001081383	Mll3	myeloid/lymphoid or mixed-lineage leukemia 3	1	0	0	1	1
NM_001081387	Ctcfl	CCCTC-binding factor (zinc finger protein)-like	1	0	0	1	1
NM_001081391	Csmd3	CUB and Sushi multiple domains 3	1	0	0	1	1
NM_001081395	Amotl1	angiomotin-like 1	1	0	0	1	1
NM_001081409	Phf20l1	PHD finger protein 20-like 1	1	0	0	1	1
NM_001081419	Dip2a	DIP2 disco-interacting protein 2 homolog A (Drosophila)	1	0	0	1	1
NM_001081420	BC026590	cDNA sequence BC026590	1	0	0	1	1
NM_001081430	Nat12	N-acetyltransferase 12	1	0	0	1	1
NM_001081433	Ankrd44	ankyrin repeat domain 44	1	0	0	1	1
NM_001081437	Fbln2	fibulin 2	1	0	0	1	1
NM_001081557	Camta1	calmodulin binding transcription activator 1	1	0	0	1	1
NM_001081567	Mapk10	mitogen-activated protein kinase 10	1	0	0	1	1
NM_001081633	Es2el	expressed sequence 2 embryonic lethal	1	0	0	1	1
NM_001081641	Pitpnm3	PITPNM family member 3	1	0	0	1	1
NM_001081750	Zfp664	zinc finger protein 664	1	0	0	1	1
NM_001081956	Sfrs17b	splicing factor, arginine/serine-rich 17b	1	0	0	1	1
NM_001081963	9430020K01Rik	RIKEN cDNA 9430020K01 gene	1	0	0	1	1
NM_001081971	Gm1337	gene model 1337, (NCBI)	1	0	0	1	1
NM_001081977	Rnf144a	ring finger protein 144A	1	0	0	1	1
NM_001082414	Sh3d19	SH3 domain protein D19	1	0	0	1	1
NM_001082483	Efr3b	EFR3 homolog B (S. cerevisiae)	1	0	0	1	1
NM_001082531	Pla2g2a	phospholipase A2, group IIA (platelets, synovial fluid)	1	0	0	1	1
NM_001082552	Trim21	tripartite motif-containing 21	1	0	0	1	1
NM_001083114	Pphln1	periphilin 1	1	0	0	1	1
NM_001083126	Lhx6	LIM homeobox protein 6	1	0	0	1	1
NM_001083127	Lhx6	LIM homeobox protein 6	1	0	0	1	1
NM_001083312	Gbp6	guanylate binding protein 6	1	0	0	1	1
NM_001083342	Ptchd2	patched domain containing 2	1	0	0	1	1
NM_001083628	AK220484	cDNA sequence AK220484	1	0	0	1	1
NM_001083806	Gria2	glutamate receptor, ionotropic, AMPA2 (alpha 2)	1	0	0	1	1
NM_001083807	Rusc1	RUN and SH3 domain containing 1	1	0	0	1	1
NM_001083808	Rusc1	RUN and SH3 domain containing 1	1	0	0	1	1
NM_001083880	1600012H06Rik	RIKEN cDNA 1600012H06 gene	1	0	0	1	1
NM_001083881	1600012H06Rik	RIKEN cDNA 1600012H06 gene	1	0	0	1	1
NM_001083882	1600012H06Rik	RIKEN cDNA 1600012H06 gene	1	0	0	1	1
NM_001083894	Liph	lipase, member H	1	0	0	1	1
NM_001083901	Hiatl1	hippocampus abundant transcript-like 1	1	0	0	1	1
NM_001083917	Scn3b	sodium channel, voltage-gated, type III, beta	1	0	0	1	1
NM_001083934	Myom1	myomesin 1	1	0	0	1	1
NM_001083967	Tcf4	transcription factor 4	1	0	0	1	1
NM_001085373	Mcc	mutated in colorectal cancers	1	0	0	1	1
NM_001085385	1600014C10Rik	RIKEN cDNA 1600014C10 gene	1	0	0	1	1
NM_001085412	OTTMUSG00000010322	predicted gene, OTTMUSG00000010322	1	0	0	1	1
NM_001085415	Zfp467	zinc finger protein 467	1	0	0	1	1
NM_001085416	Zfp467	zinc finger protein 467	1	0	0	1	1
NM_001085421	Tspyl5	testis-specific protein, Y-encoded-like 5	1	0	0	1	1
NM_001085440	Smcr8	Smith-Magenis syndrome chromosome region, candidate 8 homolog (human)	1	0	0	1	1
NM_001085495	Arfgef2	ADP-ribosylation factor guanine nucleotide-exchange factor 2 (brefeldin A-inhibited)	1	0	0	1	1
NM_001085507	Zbtb34	zinc finger and BTB domain containing 34	1	0	0	1	1
NM_001085508	4930500O05Rik	RIKEN cDNA 4930500O05 gene	1	0	0	1	1
NM_001085515	AI464131	expressed sequence AI464131	1	0	0	1	1
NM_001093750	Ptchd1	patched domain containing 1	1	0	0	1	1
NM_001093759	2410002O22Rik	RIKEN cDNA 2410002O22 gene	1	0	0	1	1
NM_001093760	2410002O22Rik	RIKEN cDNA 2410002O22 gene	1	0	0	1	1
NM_001093766	Myadm	myeloid-associated differentiation marker	1	0	0	1	1
NM_001097617	C1s	complement component 1, s subcomponent	1	0	0	1	1
NM_001097644	Ccnyl1	cyclin Y-like 1	1	0	0	1	1
NM_001098203	Hic1	hypermethylated in cancer 1	1	0	0	1	1
NM_001098226	Tead3	TEA domain family member 3	1	0	0	1	1
NM_001098227	Sdcbp	syndecan binding protein	1	0	0	1	1
NM_001098233	Purg	purine-rich element binding protein G	1	0	0	1	1
NM_001098810	Ptrh2	peptidyl-tRNA hydrolase 2	1	0	0	1	1
NM_001098836	Atxn7l3	ataxin 7-like 3	1	0	0	1	1
NM_001098837	Atxn7l3	ataxin 7-like 3	1	0	0	1	1
NM_001111016	Nav2	neuron navigator 2	1	0	0	1	1
NM_007386	Aco1	aconitase 1	1	0	0	1	1
NM_007389	Chrna1	cholinergic receptor, nicotinic, alpha polypeptide 1 (muscle)	1	0	0	1	1
NM_007395	Acvr1b	activin A receptor, type 1B	1	0	0	1	1
NM_007396	Acvr2a	activin receptor IIA	1	0	0	1	1
NM_007403	Adam8	a disintegrin and metallopeptidase domain 8	1	0	0	1	1
NM_007413	Adora2b	adenosine A2b receptor	1	0	0	1	1
NM_007417	Adra2a	adrenergic receptor, alpha 2a	1	0	0	1	1
NM_007441	Alx3	aristaless 3	1	0	0	1	1
NM_007460	Ap3d1	adaptor-related protein complex 3, delta 1 subunit	1	0	0	1	1
NM_007463	Speg	SPEG complex locus	1	0	0	1	1
NM_007464	Birc3	baculoviral IAP repeat-containing 3	1	0	0	1	1
NM_007466	Api5	apoptosis inhibitor 5	1	0	0	1	1
NM_007470	Apod	apolipoprotein D	1	0	0	1	1
NM_007473	Aqp7	aquaporin 7	1	0	0	1	1
NM_007478	Arf3	ADP-ribosylation factor 3	1	0	0	1	1
NM_007483	Rhob	ras homolog gene family, member B	1	0	0	1	1
NM_007487	Arl4a	ADP-ribosylation factor-like 4A	1	0	0	1	1
NM_007488	Arnt2	aryl hydrocarbon receptor nuclear translocator 2	1	0	0	1	1
NM_007493	Asgr2	asialoglycoprotein receptor 2	1	0	0	1	1
NM_007495	Astn1	astrotactin 1	1	0	0	1	1
NM_007496	Zfhx3	zinc finger homeobox 3	1	0	0	1	1
NM_007500	Atoh1	atonal homolog 1 (Drosophila)	1	0	0	1	1
NM_007501	Neurod4	neurogenic differentiation 4	1	0	0	1	1
NM_007503	Fxyd2	FXYD domain-containing ion transport regulator 2	1	0	0	1	1
NM_007509	Atp6v1b2	ATPase, H+ transporting, lysosomal V1 subunit B2	1	0	0	1	1
NM_007513	Slc7a1	solute carrier family 7 (cationic amino acid transporter, y+ system), member 1	1	0	0	1	1
NM_007514	Slc7a2	solute carrier family 7 (cationic amino acid transporter, y+ system), member 2	1	0	0	1	1
NM_007516	Hnrnpd	heterogeneous nuclear ribonucleoprotein D	1	0	0	1	1
NM_007530	Bcap29	B-cell receptor-associated protein 29	0	0	1	1	1
NM_007537	Bcl2l2	Bcl2-like 2	1	0	0	1	1
NM_007543	Ceacam2	CEA-related cell adhesion molecule 2	1	0	0	1	1
NM_007549	Blk	B lymphoid kinase	1	0	0	1	1
NM_007558	Bmp8a	bone morphogenetic protein 8a	1	0	0	1	1
NM_007559	Bmp8b	bone morphogenetic protein 8b	1	0	0	1	1
NM_007564	Zfp36l1	zinc finger protein 36, C3H type-like 1	1	0	0	1	1
NM_007566	Birc6	baculoviral IAP repeat-containing 6	1	0	0	1	1
NM_007567	Bsn	bassoon	1	0	0	1	1
NM_007570	Btg2	B-cell translocation gene 2, anti-proliferative	0	0	1	1	1
NM_007577	C5ar1	complement component 5a receptor 1	1	0	0	1	1
NM_007588	Calcr	calcitonin receptor	1	0	0	1	1
NM_007592	Car8	carbonic anhydrase 8	1	0	0	1	1
NM_007594	Calu	calumenin	0	0	1	1	1
NM_007595	Camk2b	calcium/calmodulin-dependent protein kinase II, beta	1	0	0	1	1
NM_007599	Capg	capping protein (actin filament), gelsolin-like	1	0	0	1	1
NM_007600	Capn1	calpain 1	1	0	0	1	1
NM_007603	Capn6	calpain 6	1	0	0	1	1
NM_007611	Casp7	caspase 7	1	0	0	1	1
NM_007623	Cbx2	chromobox homolog 2 (Drosophila Pc class)	1	0	0	1	1
NM_007627	Cckbr	cholecystokinin B receptor	1	0	0	1	1
NM_007631	Ccnd1	cyclin D1	0	0	1	1	1
NM_007643	Cd36	CD36 antigen	1	0	0	1	1
NM_007647	Entpd5	ectonucleoside triphosphate diphosphohydrolase 5	1	0	0	1	1
NM_007648	Cd3e	CD3 antigen, epsilon polypeptide	1	0	0	1	1
NM_007658	Cdc25a	cell division cycle 25 homolog A (S. pombe)	1	0	0	1	1
NM_007672	Cdr2	cerebellar degeneration-related 2	1	0	0	1	1
NM_007673	Cdx2	caudal type homeo box 2	1	0	0	1	1
NM_007677	Psg17	pregnancy specific glycoprotein 17	1	0	0	1	1
NM_007682	Cenpb	centromere protein B	1	0	0	1	1
NM_007696	Ovgp1	oviductal glycoprotein 1	1	0	0	1	1
NM_007697	Chl1	cell adhesion molecule with homology to L1CAM	1	0	0	1	1
NM_007701	Vsx2	visual system homeobox 2	1	0	0	1	1
NM_007711	Clcn3	chloride channel 3	1	0	0	1	1
NM_007724	Cnga2	cyclic nucleotide gated channel alpha 2	1	0	0	1	1
NM_007725	Cnn2	calponin 2	1	0	0	1	1
NM_007733	Col19a1	collagen, type XIX, alpha 1	1	0	0	1	1
NM_007736	Col4a5	collagen, type IV, alpha 5	0	0	1	1	1
NM_007739	Col8a1	collagen, type VIII, alpha 1	1	0	0	1	1
NM_007743	Col1a2	collagen, type I, alpha 2	1	0	0	1	1
NM_007754	Cpd	carboxypeptidase D	1	0	0	1	1
NM_007758	Cr2	complement receptor 2	1	0	0	1	1
NM_007760	Crat	carnitine acetyltransferase	1	0	0	1	1
NM_007764	Crkl	v-crk sarcoma virus CT10 oncogene homolog (avian)-like	1	0	0	1	1
NM_007768	Crp	C-reactive protein, pentraxin-related	1	0	0	1	1
NM_007778	Csf1	colony stimulating factor 1 (macrophage)	1	0	0	1	1
NM_007780	Csf2rb	colony stimulating factor 2 receptor, beta, low-affinity (granulocyte-macrophage)	1	0	0	1	1
NM_007788	Csnk2a1	casein kinase 2, alpha 1 polypeptide	1	0	0	1	1
NM_007798	Ctsb	cathepsin B	1	0	0	1	1
NM_007814	Cyp2b19	cytochrome P450, family 2, subfamily b, polypeptide 19	1	0	0	1	1
NM_007831	Dcc	deleted in colorectal carcinoma	1	0	0	1	1
NM_007859	Dffb	DNA fragmentation factor, beta subunit	1	0	0	1	1
NM_007861	Dld	dihydrolipoamide dehydrogenase	1	0	0	1	1
NM_007863	Mpp3	membrane protein, palmitoylated 3 (MAGUK p55 subfamily member 3)	1	0	0	1	1
NM_007866	Dll3	delta-like 3 (Drosophila)	1	0	0	1	1
NM_007869	Dnajc1	DnaJ (Hsp40) homolog, subfamily C, member 1	0	0	1	1	1
NM_007870	Dnase1l3	deoxyribonuclease 1-like 3	1	0	0	1	1
NM_007872	Dnmt3a	DNA methyltransferase 3A	1	0	0	1	1
NM_007875	Dpagt1	dolichyl-phosphate (UDP-N-acetylglucosamine) acetylglucosaminephosphotransferase 1 (GlcNAc-1-P transferase)	1	0	0	1	1
NM_007891	E2f1	E2F transcription factor 1	1	0	0	1	1
NM_007896	Mapre1	microtubule-associated protein, RP/EB family, member 1	1	0	0	1	1
NM_007911	Efnb3	ephrin B3	1	0	0	1	1
NM_007922	Elk1	ELK1, member of ETS oncogene family	1	0	0	1	1
NM_007936	Epha4	Eph receptor A4	0	0	1	1	1
NM_007937	Epha5	Eph receptor A5	1	0	0	1	1
NM_007945	Eps8	epidermal growth factor receptor pathway substrate 8	1	0	0	1	1
NM_007946	Epx	eosinophil peroxidase	1	0	0	1	1
NM_007949	Ercc2	excision repair cross-complementing rodent repair deficiency, complementation group 2	1	0	0	1	1
NM_007950	Ereg	epiregulin	1	0	0	1	1
NM_007953	Esrra	estrogen related receptor, alpha	1	0	0	1	1
NM_007961	Etv6	ets variant gene 6 (TEL oncogene)	1	0	0	1	1
NM_007962	Mpzl2	myelin protein zero-like 2	1	0	0	1	1
NM_007964	Evi5	ecotropic viral integration site 5	1	0	0	1	1
NM_007970	Ezh1	enhancer of zeste homolog 1 (Drosophila)	1	0	0	1	1
NM_007981	Acsl1	acyl-CoA synthetase long-chain family member 1	1	0	0	1	1
NM_007983	Faf1	Fas-associated factor 1	1	0	0	1	1
NM_007985	Fancc	Fanconi anemia, complementation group C	1	0	0	1	1
NM_007992	Fbln2	fibulin 2	1	0	0	1	1
NM_008029	Flt4	FMS-like tyrosine kinase 4	1	0	0	1	1
NM_008031	Fmr1	fragile X mental retardation syndrome 1 homolog	1	0	0	1	1
NM_008037	Fosl2	fos-like antigen 2	1	0	0	1	1
NM_008045	Fshb	follicle stimulating hormone beta	1	0	0	1	1
NM_008056	Fzd6	frizzled homolog 6 (Drosophila)	1	0	0	1	1
NM_008057	Fzd7	frizzled homolog 7 (Drosophila)	1	0	0	1	1
NM_008061	G6pc	glucose-6-phosphatase, catalytic	1	0	0	1	1
NM_008068	Gabra6	gamma-aminobutyric acid (GABA-A) receptor, subunit alpha 6	0	0	1	1	1
NM_008070	Gabrb2	gamma-aminobutyric acid (GABA-A) receptor, subunit beta 2	1	0	0	1	1
NM_008076	Gabrr2	gamma-aminobutyric acid (GABA-C) receptor, subunit rho 2	1	0	0	1	1
NM_008081	B4galnt2	beta-1,4-N-acetyl-galactosaminyl transferase 2	1	0	0	1	1
NM_008089	Gata1	GATA binding protein 1	1	0	0	1	1
NM_008102	Gch1	GTP cyclohydrolase 1	1	0	0	1	1
NM_008106	Opn1mw	opsin 1 (cone pigments), medium-wave-sensitive (color blindness, deutan)	1	0	0	1	1
NM_008108	Gdf3	growth differentiation factor 3	1	0	0	1	1
NM_008126	Gjb3	gap junction protein, beta 3	1	0	0	1	1
NM_008141	Gnat2	guanine nucleotide binding protein, alpha transducing 2	1	0	0	1	1
NM_008171	Grin2b	glutamate receptor, ionotropic, NMDA2B (epsilon 2)	1	0	0	1	1
NM_008214	Hars	histidyl-tRNA synthetase	1	0	0	1	1
NM_008224	Hcfc1	host cell factor C1	1	0	0	1	1
NM_008227	Hcn3	hyperpolarization-activated, cyclic nucleotide-gated K+ 3	1	0	0	1	1
NM_008231	Hdgf	hepatoma-derived growth factor	1	0	0	1	1
NM_008236	Hes2	hairy and enhancer of split 2 (Drosophila)	1	0	0	1	1
NM_008237	Hes3	hairy and enhancer of split 3 (Drosophila)	1	0	0	1	1
NM_008261	Hnf4a	hepatic nuclear factor 4, alpha	1	0	0	1	1
NM_008265	Hoxa4	homeo box A4	1	0	0	1	1
NM_008270	Hoxb9	homeo box B9	1	0	0	1	1
NM_008272	Hoxc9	homeo box C9	1	0	0	1	1
NM_008275	Hoxd13	homeo box D13	1	0	0	1	1
NM_008288	Hsd11b1	hydroxysteroid 11-beta dehydrogenase 1	1	0	0	1	1
NM_008306	Ndst1	N-deacetylase/N-sulfotransferase (heparan glucosaminyl) 1	1	0	0	1	1
NM_008312	Htr2c	5-hydroxytryptamine (serotonin) receptor 2C	1	0	0	1	1
NM_008313	Htr4	5 hydroxytryptamine (serotonin) receptor 4	0	0	1	1	1
NM_008314	Htr5a	5-hydroxytryptamine (serotonin) receptor 5A	1	0	0	1	1
NM_008316	Hus1	Hus1 homolog (S. pombe)	1	0	0	1	1
NM_008320	Irf8	interferon regulatory factor 8	1	0	0	1	1
NM_008325	Idua	iduronidase, alpha-L-	1	0	0	1	1
NM_008330	Ifi47	interferon gamma inducible protein 47	1	0	0	1	1
NM_008343	Igfbp3	insulin-like growth factor binding protein 3	1	0	0	1	1
NM_008354	Il12rb2	interleukin 12 receptor, beta 2	1	0	0	1	1
NM_008362	Il1r1	interleukin 1 receptor, type I	1	0	0	1	1
NM_008390	Irf1	interferon regulatory factor 1	1	0	0	1	1
NM_008422	Kcnc3	potassium voltage gated channel, Shaw-related subfamily, member 3	1	0	0	1	1
NM_008431	Kcnk4	potassium channel, subfamily K, member 4	1	0	0	1	1
NM_008440	Kif1a	kinesin family member 1A	1	0	0	1	1
NM_008441	Kif1b	kinesin family member 1B	0	0	1	1	1
NM_008442	Kif2a	kinesin family member 2A	0	0	1	1	1
NM_008443	Kif3a	kinesin family member 3A	1	0	0	1	1
NM_008444	Kif3b	kinesin family member 3B	1	0	0	1	1
NM_008445	Kif3c	kinesin family member 3C	1	0	0	1	1
NM_008449	Kif5c	kinesin family member 5C	1	0	0	1	1
NM_008451	Klc2	kinesin light chain 2	1	0	0	1	1
NM_008467	Kpna4	karyopherin (importin) alpha 4	1	0	0	1	1
NM_008493	Lep	leptin	1	0	0	1	1
NM_008500	Lhx6	LIM homeobox protein 6	1	0	0	1	1
NM_008501	Lif	leukemia inhibitory factor	1	0	0	1	1
NM_008507	Sh2b3	SH2B adaptor protein 3	0	0	1	1	1
NM_008508	Lor	loricrin	1	0	0	1	1
NM_008509	Lpl	lipoprotein lipase	1	0	0	1	1
NM_008541	Smad5	MAD homolog 5 (Drosophila)	1	0	0	1	1
NM_008549	Man2a1	mannosidase 2, alpha 1	1	0	0	1	1
NM_008576	Abcc1	ATP-binding cassette, sub-family C (CFTR/MRP), member 1	1	0	0	1	1
NM_008591	Met	met proto-oncogene	1	0	0	1	1
NM_008596	Sypl2	synaptophysin-like 2	1	0	0	1	1
NM_008599	Cxcl9	chemokine (C-X-C motif) ligand 9	1	0	0	1	1
NM_008606	Mmp11	matrix metallopeptidase 11	0	0	1	1	1
NM_008620	Gbp4	guanylate binding protein 4	1	0	0	1	1
NM_008622	Mpv17	Mpv17 transgene, kidney disease mutant	1	0	0	1	1
NM_008629	Msi1	Musashi homolog 1(Drosophila)	1	0	0	1	1
NM_008633	Mtap4	microtubule-associated protein 4	1	0	0	1	1
NM_008634	Mtap1b	microtubule-associated protein 1B	1	0	0	1	1
NM_008636	Mtf1	metal response element binding transcription factor 1	1	0	0	1	1
NM_008659	Myo1c	myosin IC	1	0	0	1	1
NM_008665	Myt1	myelin transcription factor 1	1	0	0	1	1
NM_008677	Ncf4	neutrophil cytosolic factor 4	1	0	0	1	1
NM_008679	Ncoa3	nuclear receptor coactivator 3	1	0	0	1	1
NM_008681	Ndrg1	N-myc downstream regulated gene 1	1	0	0	1	1
NM_008684	Neo1	neogenin	1	0	0	1	1
NM_008688	Nfic	nuclear factor I/C	1	0	0	1	1
NM_008691	Nefm	neurofilament, medium polypeptide	1	0	0	1	1
NM_008695	Nid2	nidogen 2	0	0	1	1	1
NM_008696	Map4k4	mitogen-activated protein kinase kinase kinase kinase 4	1	0	0	1	1
NM_008704	Nme1	non-metastatic cells 1, protein (NM23A) expressed in	1	0	0	1	1
NM_008709	Mycn	v-myc myelocytomatosis viral related oncogene, neuroblastoma derived (avian)	0	0	1	1	1
NM_008728	Npr3	natriuretic peptide receptor 3	1	0	0	1	1
NM_008730	Nptx1	neuronal pentraxin 1	1	0	0	1	1
NM_008736	Nrl	neural retina leucine zipper gene	1	0	0	1	1
NM_008738	Nrtn	neurturin	1	0	1	0	1
NM_008739	Nsd1	nuclear receptor-binding SET-domain protein 1	1	0	0	1	1
NM_008744	Ntn1	netrin 1	1	0	0	1	1
NM_008745	Ntrk2	neurotrophic tyrosine kinase, receptor, type 2	1	0	0	1	1
NM_008752	Nxph2	neurexophilin 2	1	0	0	1	1
NM_008756	Ocln	occludin	1	0	0	1	1
NM_008760	Ogn	osteoglycin	1	0	0	1	1
NM_008761	Fxyd5	FXYD domain-containing ion transport regulator 5	1	0	0	1	1
NM_008766	Slc22a6	solute carrier family 22 (organic anion transporter), member 6	1	0	0	1	1
NM_008771	P2rx1	purinergic receptor P2X, ligand-gated ion channel, 1	1	0	0	1	1
NM_008775	Pafah1b2	platelet-activating factor acetylhydrolase, isoform 1b, alpha2 subunit	1	0	0	1	1
NM_008794	Pcsk7	proprotein convertase subtilisin/kexin type 7	1	0	0	1	1
NM_008797	Pcx	pyruvate carboxylase	1	0	0	1	1
NM_008802	Pde7a	phosphodiesterase 7A	1	0	0	1	1
NM_008817	Peg3	paternally expressed 3	1	0	0	1	1
NM_008824	Pfkfb1	6-phosphofructo-2-kinase/fructose-2,6-biphosphatase 1	1	0	0	1	1
NM_008826	Pfkl	phosphofructokinase, liver, B-type	1	0	0	1	1
NM_008855	Prkcb1	protein kinase C, beta 1	1	0	0	1	1
NM_008862	Pkia	protein kinase inhibitor, alpha	1	0	0	1	1
NM_008863	Pkib	protein kinase inhibitor beta, cAMP dependent, testis specific	1	0	0	1	1
NM_008871	Serpine1	serine (or cysteine) peptidase inhibitor, clade E, member 1	1	0	0	1	1
NM_008879	Lcp1	lymphocyte cytosolic protein 1	1	0	0	1	1
NM_008882	Plxna2	plexin A2	1	0	0	1	1
NM_008904	Ppargc1a	peroxisome proliferative activated receptor, gamma, coactivator 1 alpha	0	0	1	1	1
NM_008906	Ctsa	cathepsin A	1	0	0	1	1
NM_008909	Ppl	periplakin	1	0	0	1	1
NM_008924	Prkar2a	protein kinase, cAMP dependent regulatory, type II alpha	1	0	0	1	1
NM_008925	Prkcsh	protein kinase C substrate 80K-H	1	0	0	1	1
NM_008937	Prox1	prospero-related homeobox 1	1	0	0	1	1
NM_008942	Npepps	aminopeptidase puromycin sensitive	1	0	0	1	1
NM_008956	Ptbp1	polypyrimidine tract binding protein 1	1	0	0	1	1
NM_008969	Ptgs1	prostaglandin-endoperoxide synthase 1	1	0	0	1	1
NM_008974	Ptp4a2	protein tyrosine phosphatase 4a2	1	0	0	1	1
NM_008976	Ptpn14	protein tyrosine phosphatase, non-receptor type 14	1	0	0	1	1
NM_008982	Ptprj	protein tyrosine phosphatase, receptor type, J	1	0	0	1	1
NM_008986	Ptrf	polymerase I and transcript release factor	1	0	0	1	1
NM_008996	Rab1	RAB1, member RAS oncogene family	1	0	0	1	1
NM_008997	Rab11b	RAB11B, member RAS oncogene family	1	0	0	1	1
NM_008998	Rab17	RAB17, member RAS oncogene family	1	0	0	1	1
NM_009008	Rac2	RAS-related C3 botulinum substrate 2	1	0	0	1	1
NM_009010	Rad23a	RAD23a homolog (S. cerevisiae)	1	0	0	1	1
NM_009025	Rasa3	RAS p21 protein activator 3	1	0	0	1	1
NM_009029	Rb1	retinoblastoma 1	1	0	0	1	1
NM_009030	Rbbp4	retinoblastoma binding protein 4	1	0	0	1	1
NM_009037	Rcn1	reticulocalbin 1	1	0	0	1	1
NM_009086	Rpo1-2	RNA polymerase 1-2	1	0	0	1	1
NM_009088	Rpo1-4	RNA polymerase 1-4	1	0	0	1	1
NM_009101	Rras	Harvey rat sarcoma oncogene, subgroup R	1	0	0	1	1
NM_009119	Sap18	Sin3-associated polypeptide 18	1	0	0	1	1
NM_009127	Scd1	stearoyl-Coenzyme A desaturase 1	1	0	0	1	1
NM_009128	Scd2	stearoyl-Coenzyme A desaturase 2	1	0	0	1	1
NM_009137	Ccl22	chemokine (C-C motif) ligand 22	1	0	0	1	1
NM_009154	Sema5a	sema domain, seven thrombospondin repeats (type 1 and type 1-like), transmembrane domain (TM) and short cytoplasmic domain, (semaphorin) 5A	1	0	0	1	1
NM_009157	Map2k4	mitogen-activated protein kinase kinase 4	1	0	0	1	1
NM_009158	Mapk10	mitogen-activated protein kinase 10	1	0	0	1	1
NM_009166	Sorbs1	sorbin and SH3 domain containing 1	1	0	0	1	1
NM_009181	St8sia2	ST8 alpha-N-acetyl-neuraminide alpha-2,8-sialyltransferase 2	1	0	0	1	1
NM_009182	St8sia3	ST8 alpha-N-acetyl-neuraminide alpha-2,8-sialyltransferase 3	1	0	0	1	1
NM_009184	Ptk6	PTK6 protein tyrosine kinase 6	1	0	0	1	1
NM_009190	Vps4b	vacuolar protein sorting 4b (yeast)	1	0	0	1	1
NM_009196	Slc16a1	solute carrier family 16 (monocarboxylic acid transporters), member 1	1	0	0	1	1
NM_009197	Slc16a2	solute carrier family 16 (monocarboxylic acid transporters), member 2	1	0	0	1	1
NM_009199	Slc1a1	solute carrier family 1 (neuronal/epithelial high affinity glutamate transporter, system Xag), member 1	1	0	0	1	1
NM_009203	Slc22a12	solute carrier family 22 (organic anion/cation transporter), member 12	1	0	0	1	1
NM_009204	Slc2a4	solute carrier family 2 (facilitated glucose transporter), member 4	1	0	0	1	1
NM_009209	Slc6a2	solute carrier family 6 (neurotransmitter transporter, noradrenalin), member 2	1	0	0	1	1
NM_009212	Ighmbp2	immunoglobulin mu binding protein 2	1	0	0	1	1
NM_009218	Sstr3	somatostatin receptor 3	1	0	0	1	1
NM_009230	Soat1	sterol O-acyltransferase 1	1	0	0	1	1
NM_009231	Sos1	Son of sevenless homolog 1 (Drosophila)	1	0	0	1	1
NM_009234	Sox11	SRY-box containing gene 11	0	0	1	1	1
NM_009239	Sp4	trans-acting transcription factor 4	1	0	0	1	1
NM_009256	Serpinb9	serine (or cysteine) peptidase inhibitor, clade B, member 9	1	0	0	1	1
NM_009259	Spn	sialophorin	1	0	0	1	1
NM_009274	Srpk2	serine/arginine-rich protein specific kinase 2	1	0	0	1	1
NM_009275	Srprb	signal recognition particle receptor, B subunit	1	0	0	1	1
NM_009277	Trim21	tripartite motif-containing 21	1	0	0	1	1
NM_009282	Stag1	stromal antigen 1	1	0	0	1	1
NM_009283	Stat1	signal transducer and activator of transcription 1	1	0	0	1	1
NM_009285	Stc1	stanniocalcin 1	1	0	0	1	1
NM_009287	Stim1	stromal interaction molecule 1	1	0	0	1	1
NM_009298	Surf6	surfeit gene 6	1	0	0	1	1
NM_009302	Swap70	SWA-70 protein	1	0	0	1	1
NM_009304	Syngr2	synaptogyrin 2	1	0	0	1	1
NM_009305	Syp	synaptophysin	1	0	0	1	1
NM_009318	Tapbp	TAP binding protein	1	0	0	1	1
NM_009320	Slc6a6	solute carrier family 6 (neurotransmitter transporter, taurine), member 6	1	0	0	1	1
NM_009334	Tcfap2b	transcription factor AP-2 beta	1	0	0	1	1
NM_009348	Tectb	tectorin beta	1	0	0	1	1
NM_009360	Tfam	transcription factor A, mitochondrial	1	0	0	1	1
NM_009368	Tgfb3	transforming growth factor, beta 3	1	0	0	1	1
NM_009373	Tgm2	transglutaminase 2, C polypeptide	1	0	0	1	1
NM_009374	Tgm3	transglutaminase 3, E polypeptide	1	0	0	1	1
NM_009394	Tnnc2	troponin C2, fast	1	0	0	1	1
NM_009398	Tnfaip6	tumor necrosis factor alpha induced protein 6	1	0	0	1	1
NM_009399	Tnfrsf11a	tumor necrosis factor receptor superfamily, member 11a	1	0	0	1	1
NM_009411	Tpbpa	trophoblast specific protein alpha	1	0	0	1	1
NM_009414	Tph1	tryptophan hydroxylase 1	1	0	0	1	1
NM_009416	Tpm2	tropomyosin 2, beta	1	0	0	1	1
NM_009423	Traf4	Tnf receptor associated factor 4	1	0	0	1	1
NM_009424	Traf6	Tnf receptor-associated factor 6	1	0	0	1	1
NM_009425	Tnfsf10	tumor necrosis factor (ligand) superfamily, member 10	1	0	0	1	1
NM_009442	Ttf1	transcription termination factor 1	1	0	0	1	1
NM_009447	Tuba4a	tubulin, alpha 4A	1	0	0	1	1
NM_009452	Tnfsf4	tumor necrosis factor (ligand) superfamily, member 4	1	0	0	1	1
NM_009456	Ube2l3	ubiquitin-conjugating enzyme E2L 3	1	0	0	1	1
NM_009464	Ucp3	uncoupling protein 3 (mitochondrial, proton carrier)	1	0	0	1	1
NM_009469	Ulk1	Unc-51 like kinase 1 (C. elegans)	1	0	0	1	1
NM_009471	Umps	uridine monophosphate synthetase	1	0	0	1	1
NM_009484	Uty	ubiquitously transcribed tetratricopeptide repeat gene, Y chromosome	1	0	0	1	1
NM_009486	Vmn2r89	vomeronasal 2, receptor 89	1	0	0	1	1
NM_009487	Vmn2r89	vomeronasal 2, receptor 89	1	0	0	1	1
NM_009496	Vamp1	vesicle-associated membrane protein 1	1	0	0	1	1
NM_009502	Vcl	vinculin	1	0	0	1	1
NM_009504	Vdr	vitamin D receptor	1	0	0	1	1
NM_009516	Wee1	wee 1 homolog (S. pombe)	1	0	0	1	1
NM_009517	Zmat3	zinc finger matrin type 3	1	0	0	1	1
NM_009518	Wnt10a	wingless related MMTV integration site 10a	1	0	0	1	1
NM_009522	Wnt3a	wingless-related MMTV integration site 3A	1	0	0	1	1
NM_009534	Yap1	yes-associated protein 1	1	0	0	1	1
NM_009546	Trim25	tripartite motif-containing 25	1	0	0	1	1
NM_009565	Zbtb7b	zinc finger and BTB domain containing 7B	1	0	0	1	1
NM_009577	Zik1	zinc finger protein interacting with K protein 1	1	0	0	1	1
NM_009595	Abl2	v-abl Abelson murine leukemia viral oncogene homolog 2 (arg, Abelson-related gene)	1	0	0	1	1
NM_009597	Accn2	amiloride-sensitive cation channel 2, neuronal	1	0	0	1	1
NM_009602	Chrnb2	cholinergic receptor, nicotinic, beta polypeptide 2 (neuronal)	1	0	0	1	1
NM_009606	Acta1	actin, alpha 1, skeletal muscle	0	0	1	1	1
NM_009612	Acvrl1	activin A receptor, type II-like 1	1	0	0	1	1
NM_009622	Adcy1	adenylate cyclase 1	1	0	0	1	1
NM_009633	Adra2b	adrenergic receptor, alpha 2b	1	0	0	1	1
NM_009640	Angpt1	angiopoietin 1	1	0	0	1	1
NM_009642	Agtrap	angiotensin II, type I receptor-associated protein	1	0	0	1	1
NM_009662	Alox5	arachidonate 5-lipoxygenase	1	0	0	1	1
NM_009665	Amd1	S-adenosylmethionine decarboxylase 1	1	0	0	1	1
NM_009667	Ampd3	AMP deaminase 3	1	0	0	1	1
NM_009674	Anxa7	annexin A7	1	0	0	1	1
NM_009675	Aoc3	amine oxidase, copper containing 3	1	0	0	1	1
NM_009678	Ap1m2	adaptor protein complex AP-1, mu 2 subunit	1	0	0	1	1
NM_009703	Araf	v-raf murine sarcoma 3611 viral oncogene homolog	1	0	0	1	1
NM_009712	Arsb	arylsulfatase B	1	0	0	1	1
NM_009719	Neurog3	neurogenin 3	1	0	0	1	1
NM_009723	Atp2b2	ATPase, Ca++ transporting, plasma membrane 2	1	0	0	1	1
NM_009730	Atrn	attractin	1	0	0	1	1
NM_009738	Bche	butyrylcholinesterase	1	0	0	1	1
NM_009745	Bcl7b	B-cell CLL/lymphoma 7B	1	0	0	1	1
NM_009754	Bcl2l11	BCL2-like 11 (apoptosis facilitator)	1	0	0	1	1
NM_009758	Bmpr1a	bone morphogenetic protein receptor, type 1A	1	0	0	1	1
NM_009759	Bmx	BMX non-receptor tyrosine kinase	1	0	0	1	1
NM_009777	C1qb	complement component 1, q subcomponent, beta polypeptide	1	0	0	1	1
NM_009779	C3ar1	complement component 3a receptor 1	1	0	0	1	1
NM_009782	Cacna1e	calcium channel, voltage-dependent, R type, alpha 1E subunit	1	0	0	1	1
NM_009788	Calb1	calbindin 1, 28kDa	1	0	0	1	1
NM_009790	Calm1	calmodulin 1	1	0	0	1	1
NM_009797	Capza1	capping protein (actin filament) muscle Z-line, alpha 1	1	0	0	1	1
NM_009799	Car1	carbonic anhydrase 1	1	0	0	1	1
NM_009801	Car2	carbonic anhydrase 2	1	0	0	1	1
NM_009804	Cat	catalase	1	0	0	1	1
NM_009806	Cask	calcium/calmodulin-dependent serine protein kinase (MAGUK family)	1	0	0	1	1
NM_009810	Casp3	caspase 3	0	0	1	1	1
NM_009819	Ctnna2	catenin (cadherin associated protein), alpha 2	1	0	0	1	1
NM_009824	Cbfa2t3	core-binding factor, runt domain, alpha subunit 2, translocated to, 3 (human)	1	0	0	1	1
NM_009825	Serpinh1	serine (or cysteine) peptidase inhibitor, clade H, member 1	1	0	0	1	1
NM_009831	Ccng1	cyclin G1	1	0	0	1	1
NM_009844	Cd19	CD19 antigen	1	0	0	1	1
NM_009846	Cd24a	CD24a antigen	1	0	0	1	1
NM_009847	Cd2ap	CD2-associated protein	1	0	0	1	1
NM_009856	Cd83	CD83 antigen	1	0	0	1	1
NM_009858	Cd8b1	CD8 antigen, beta chain 1	1	0	0	1	1
NM_009875	Cdkn1b	cyclin-dependent kinase inhibitor 1B	1	0	0	1	1
NM_009884	Cebpg	CCAAT/enhancer binding protein (C/EBP), gamma	1	0	0	1	1
NM_009893	Chrd	chordin	0	0	1	1	1
NM_009895	Cish	cytokine inducible SH2-containing protein	1	0	0	1	1
NM_009906	Tpp1	tripeptidyl peptidase I	1	0	0	1	1
NM_009909	Il8rb	interleukin 8 receptor, beta	1	0	0	1	1
NM_009915	Ccr2	chemokine (C-C motif) receptor 2	1	0	0	1	1
NM_009922	Cnn1	calponin 1	1	0	0	1	1
NM_009923	Cnp	2",3"-cyclic nucleotide 3" phosphodiesterase	1	0	0	1	1
NM_009924	Cnr2	cannabinoid receptor 2 (macrophage)	1	0	0	1	1
NM_009928	Col15a1	collagen, type XV, alpha 1	0	0	1	1	1
NM_009929	Col18a1	collagen, type XVIII, alpha 1	1	0	0	1	1
NM_009931	Col4a1	collagen, type IV, alpha 1	0	0	1	1	1
NM_009932	Col4a2	collagen, type IV, alpha 2	1	0	0	1	1
NM_009933	Col6a1	collagen, type VI, alpha 1	1	0	0	1	1
NM_009937	Colq	collagen-like tail subunit (single strand of homotrimer) of asymmetric acetylcholinesterase	1	0	0	1	1
NM_009970	Csf2ra	colony stimulating factor 2 receptor, alpha, low-affinity (granulocyte-macrophage)	1	0	0	1	1
NM_009974	Csnk2a2	casein kinase 2, alpha prime polypeptide	1	0	0	1	1
NM_009984	Ctsl	cathepsin L	1	0	0	1	1
NM_009992	Cyp1a1	cytochrome P450, family 1, subfamily a, polypeptide 1	1	0	0	1	1
NM_009994	Cyp1b1	cytochrome P450, family 1, subfamily b, polypeptide 1	1	0	0	1	1
NM_010002	Cyp2c38	cytochrome P450, family 2, subfamily c, polypeptide 38	1	0	0	1	1
NM_010008	Cyp2j6	cytochrome P450, family 2, subfamily j, polypeptide 6	1	0	0	1	1
NM_010009	Cyp27b1	cytochrome P450, family 27, subfamily b, polypeptide 1	1	0	0	1	1
NM_010010	Cyp46a1	cytochrome P450, family 46, subfamily a, polypeptide 1	0	0	1	1	1
NM_010012	Cyp8b1	cytochrome P450, family 8, subfamily b, polypeptide 1	1	0	0	1	1
NM_010025	Dcx	doublecortin	1	0	0	1	1
NM_010051	Dkk1	dickkopf homolog 1 (Xenopus laevis)	1	0	0	1	1
NM_010064	Dync1i2	dynein cytoplasmic 1 intermediate chain 2	1	0	0	1	1
NM_010069	Doc2a	double C2, alpha	1	0	0	1	1
NM_010072	Dpm1	dolichol-phosphate (beta-D) mannosyltransferase 1	1	0	0	1	1
NM_010074	Dpp4	dipeptidylpeptidase 4	1	0	0	1	1
NM_010080	Dspp	dentin sialophosphoprotein	1	0	0	1	1
NM_010093	E2f3	E2F transcription factor 3	1	0	0	1	1
NM_010099	Eda	ectodysplasin-A	1	0	0	1	1
NM_010104	Edn1	endothelin 1	0	0	1	1	1
NM_010107	Efna1	ephrin A1	1	0	0	1	1
NM_010121	Eif2ak3	eukaryotic translation initiation factor 2 alpha kinase 3	1	0	0	1	1
NM_010136	Eomes	eomesodermin homolog (Xenopus laevis)	1	0	0	1	1
NM_010155	Erf	Ets2 repressor factor	1	0	0	1	1
NM_010157	Esr2	estrogen receptor 2 (beta)	1	0	0	1	1
NM_010160	Cugbp2	CUG triplet repeat, RNA binding protein 2	1	0	0	1	1
NM_010170	F2rl2	coagulation factor II (thrombin) receptor-like 2	1	0	0	1	1
NM_010173	Faah	fatty acid amide hydrolase	1	0	0	1	1
NM_010174	Fabp3	fatty acid binding protein 3, muscle and heart	1	0	0	1	1
NM_010175	Fadd	Fas (TNFRSF6)-associated via death domain	1	0	0	1	1
NM_010191	Fdft1	farnesyl diphosphate farnesyl transferase 1	1	0	0	1	1
NM_010192	Fem1a	feminization 1 homolog a (C. elegans)	1	0	0	1	1
NM_010193	Fem1b	feminization 1 homolog b (C. elegans)	1	0	0	1	1
NM_010195	Lgr5	leucine rich repeat containing G protein coupled receptor 5	1	0	0	1	1
NM_010197	Fgf1	fibroblast growth factor 1	1	0	0	1	1
NM_010199	Fgf12	fibroblast growth factor 12	1	0	0	1	1
NM_010201	Fgf14	fibroblast growth factor 14	1	0	0	1	1
NM_010206	Fgfr1	fibroblast growth factor receptor 1	1	0	0	1	1
NM_010208	Fgr	Gardner-Rasheed feline sarcoma viral (Fgr) oncogene homolog	1	0	0	1	1
NM_010214	Fhl4	four and a half LIM domains 4	1	0	0	1	1
NM_010221	Fkbp10	FK506 binding protein 10	1	0	0	1	1
NM_010230	Fmn1	formin 1	1	0	0	1	1
NM_010241	Aktip	thymoma viral proto-oncogene 1 interacting protein	1	0	0	1	1
NM_010250	Gabra1	gamma-aminobutyric acid (GABA-A) receptor, subunit alpha 1	1	0	0	1	1
NM_010265	Gcnt1	glucosaminyl (N-acetyl) transferase 1, core 2	1	0	0	1	1
NM_010283	Ggta1	glycoprotein galactosyltransferase alpha 1, 3	1	0	0	1	1
NM_010284	Ghr	growth hormone receptor	0	0	1	1	1
NM_010307	Gnal	guanine nucleotide binding protein, alpha stimulating, olfactory type	1	0	0	1	1
NM_010317	Gng4	guanine nucleotide binding protein (G protein), gamma 4	1	0	0	1	1
NM_010319	Gng7	guanine nucleotide binding protein (G protein), gamma 7	1	0	0	1	1
NM_010343	Gpx5	glutathione peroxidase 5	1	0	0	1	1
NM_010349	Grik2	glutamate receptor, ionotropic, kainate 2 (beta 2)	1	0	0	1	1
NM_010365	Gtf2i	general transcription factor II I	0	0	1	1	1
NM_010408	Hcn1	hyperpolarization-activated, cyclic nucleotide-gated K+ 1	1	0	0	1	1
NM_010423	Hey1	hairy/enhancer-of-split related with YRPW motif 1	1	0	0	1	1
NM_010459	Hoxb4	homeo box B4	1	0	0	1	1
NM_010464	Hoxc13	homeo box C13	1	0	0	1	1
NM_010465	Hoxc6	homeo box C6	1	0	0	1	1
NM_010467	Hoxd1	homeo box D1	0	0	1	1	1
NM_010474	Hs3st1	heparan sulfate (glucosamine) 3-O-sulfotransferase 1	1	0	0	1	1
NM_010476	Hsd17b7	hydroxysteroid (17-beta) dehydrogenase 7	1	0	0	1	1
NM_010485	Elavl1	ELAV (embryonic lethal, abnormal vision, Drosophila)-like 1 (Hu antigen R)	1	0	0	1	1
NM_010498	Ids	iduronate 2-sulfatase	1	0	0	1	1
NM_010512	Igf1	insulin-like growth factor 1	1	0	0	1	1
NM_010515	Igf2r	insulin-like growth factor 2 receptor	1	0	0	1	1
NM_010547	Ikbkg	inhibitor of kappaB kinase gamma	1	0	0	1	1
NM_010548	Il10	interleukin 10	0	0	1	1	1
NM_010554	Il1a	interleukin 1 alpha	1	0	0	1	1
NM_010558	Il5	interleukin 5	1	0	0	1	1
NM_010560	Il6st	interleukin 6 signal transducer	1	0	0	1	1
NM_010565	Inhbc	inhibin beta-C	1	0	0	1	1
NM_010569	Invs	inversin	1	0	0	1	1
NM_010579	Eif6	eukaryotic translation initiation factor 6	1	0	0	1	1
NM_010583	Itk	IL2-inducible T-cell kinase	1	0	0	1	1
NM_010587	Itsn1	intersectin 1 (SH3 domain protein 1A)	1	0	0	1	1
NM_010590	Jub	ajuba	1	0	0	1	1
NM_010592	Jund	Jun proto-oncogene related gene d	1	0	0	1	1
NM_010595	Kcna1	potassium voltage-gated channel, shaker-related subfamily, member 1	1	0	0	1	1
NM_010597	Kcnab1	potassium voltage-gated channel, shaker-related subfamily, beta member 1	1	0	0	1	1
NM_010599	Kcnab3	potassium voltage-gated channel, shaker-related subfamily, beta member 3	1	0	0	1	1
NM_010600	Kcnh1	potassium voltage-gated channel, subfamily H (eag-related), member 1	1	0	0	1	1
NM_010605	Kcnj5	potassium inwardly-rectifying channel, subfamily J, member 5	1	0	0	1	1
NM_010613	Khsrp	KH-type splicing regulatory protein	1	0	0	1	1
NM_010615	Kif11	kinesin family member 11	1	0	0	1	1
NM_010629	Kifap3	kinesin-associated protein 3	1	0	0	1	1
NM_010630	Kifc2	kinesin family member C2	1	0	0	1	1
NM_010636	Klf12	Kruppel-like factor 12	1	0	0	1	1
NM_010656	Sspn	sarcospan	1	0	0	1	1
NM_010657	Hivep3	human immunodeficiency virus type I enhancer binding protein 3	1	0	0	1	1
NM_010669	Krt6b	keratin 6B	1	0	0	1	1
NM_010683	Lamc1	laminin, gamma 1	1	0	0	1	1
NM_010687	Large	like-glycosyltransferase	1	0	0	1	1
NM_010693	Lck	lymphocyte protein tyrosine kinase	1	0	0	1	1
NM_010709	Lgtn	ligatin	1	0	0	1	1
NM_010714	Lhx9	LIM homeobox protein 9	1	0	0	1	1
NM_010723	Lmo4	LIM domain only 4	1	0	0	1	1
NM_010726	Phyh	phytanoyl-CoA hydroxylase	1	0	0	1	1
NM_010727	Lnx1	ligand of numb-protein X 1	1	0	0	1	1
NM_010733	Lrrn3	leucine rich repeat protein 3, neuronal	1	0	0	1	1
NM_010740	Cd93	CD93 antigen	1	0	0	1	1
NM_010749	M6pr	mannose-6-phosphate receptor, cation dependent	1	0	0	1	1
NM_010752	Mad1l1	mitotic arrest deficient 1-like 1	1	0	0	1	1
NM_010757	Mafk	v-maf musculoaponeurotic fibrosarcoma oncogene family, protein K (avian)	1	0	0	1	1
NM_010777	Mbp	myelin basic protein	1	0	0	1	1
NM_010783	Mdfi	MyoD family inhibitor	0	0	1	1	1
NM_010800	Bhlhb8	basic helix-loop-helix domain containing, class B, 8	1	0	0	1	1
NM_010813	Mnt	max binding protein	1	0	0	1	1
NM_010814	Mog	myelin oligodendrocyte glycoprotein	1	0	0	1	1
NM_010820	Mpdz	multiple PDZ domain protein	1	0	0	1	1
NM_010825	Meis2	Meis homeobox 2	1	0	0	1	1
NM_010833	Msn	moesin	1	0	0	1	1
NM_010846	Mx1	myxovirus (influenza virus) resistance 1	1	0	0	1	1
NM_010847	Mxi1	Max interacting protein 1	1	0	0	1	1
NM_010864	Myo5a	myosin Va	1	0	0	1	1
NM_010876	Ncf1	neutrophil cytosolic factor 1	1	0	0	1	1
NM_010879	Nck2	non-catalytic region of tyrosine kinase adaptor protein 2	1	0	0	1	1
NM_010880	Ncl	nucleolin	1	0	0	1	1
NM_010897	Nf1	neurofibromatosis 1	1	0	0	1	1
NM_010901	Nfatc3	nuclear factor of activated T-cells, cytoplasmic, calcineurin-dependent 3	1	0	0	1	1
NM_010913	Nfya	nuclear transcription factor-Y alpha	1	0	0	1	1
NM_010916	Nhlh1	nescient helix loop helix 1	1	0	0	1	1
NM_010917	Nid1	nidogen 1	1	0	0	1	1
NM_010935	Npy6r	neuropeptide Y receptor Y6	1	0	0	1	1
NM_010947	Ntn2l	netrin 2-like (chicken)	1	0	0	1	1
NM_010950	Numbl	numb-like	0	0	1	1	1
NM_010952	Oaz2	ornithine decarboxylase antizyme 2	1	0	0	1	1
NM_010956	Ogdh	oxoglutarate dehydrogenase (lipoamide)	1	0	0	1	1
NM_011019	Osmr	oncostatin M receptor	1	0	0	1	1
NM_011027	P2rx7	purinergic receptor P2X, ligand-gated ion channel, 7	1	0	0	1	1
NM_011029	Rpsa	ribosomal protein SA	1	0	0	1	1
NM_011031	P4ha2	procollagen-proline, 2-oxoglutarate 4-dioxygenase (proline 4-hydroxylase), alpha II polypeptide	0	0	1	1	1
NM_011035	Pak1	p21 (CDKN1A)-activated kinase 1	1	0	0	1	1
NM_011041	Pax9	paired box gene 9	1	0	0	1	1
NM_011057	Pdgfb	platelet derived growth factor, B polypeptide	1	0	0	1	1
NM_011062	Pdpk1	3-phosphoinositide dependent protein kinase-1	1	0	0	1	1
NM_011066	Per2	period homolog 2 (Drosophila)	1	0	0	1	1
NM_011069	Pex11b	peroxisomal biogenesis factor 11b	1	0	0	1	1
NM_011077	Phex	phosphate regulating gene with homologies to endopeptidases on the X chromosome (hypophosphatemia, vitamin D resistant rickets)	1	0	0	1	1
NM_011079	Phkg1	phosphorylase kinase gamma 1	1	0	0	1	1
NM_011082	Pigr	polymeric immunoglobulin receptor	1	0	0	1	1
NM_011083	Pik3c2a	phosphatidylinositol 3-kinase, C2 domain containing, alpha polypeptide	1	0	0	1	1
NM_011117	Plec1	plectin 1	1	0	0	1	1
NM_011119	Pa2g4	proliferation-associated 2G4	0	0	1	1	1
NM_011122	Plod1	procollagen-lysine, 2-oxoglutarate 5-dioxygenase 1	1	0	0	1	1
NM_011123	Plp1	proteolipid protein (myelin) 1	1	0	0	1	1
NM_011126	Plunc	palate, lung, and nasal epithelium associated	1	0	0	1	1
NM_011144	Ppara	peroxisome proliferator activated receptor alpha	1	0	0	1	1
NM_011145	Ppard	peroxisome proliferator activator receptor delta	1	0	0	1	1
NM_011158	Prkar2b	protein kinase, cAMP dependent regulatory, type II beta	1	0	0	1	1
NM_011172	Prodh	proline dehydrogenase	1	0	0	1	1
NM_011192	Psme3	proteaseome (prosome, macropain) 28 subunit, 3	1	0	0	1	1
NM_011197	Ptgfrn	prostaglandin F2 receptor negative regulator	1	0	0	1	1
NM_011211	Ptprd	protein tyrosine phosphatase, receptor type, D	1	0	0	1	1
NM_011217	Ptprr	protein tyrosine phosphatase, receptor type, R	1	0	0	1	1
NM_011235	Rad51l3	RAD51-like 3 (S. cerevisiae)	1	0	0	1	1
NM_011237	Rad9	RAD9 homolog (S. pombe)	1	0	0	1	1
NM_011256	Pitpnm2	phosphatidylinositol transfer protein, membrane-associated 2	1	0	0	1	1
NM_011261	Reln	reelin	1	0	0	1	1
NM_011267	Rgs16	regulator of G-protein signaling 16	0	0	1	1	1
NM_011271	Rnase1	ribonuclease, RNase A family, 1 (pancreatic)	1	0	0	1	1
NM_011273	Xpr1	xenotropic and polytropic retrovirus receptor 1	1	0	0	1	1
NM_011276	Rnf12	ring finger protein 12	1	0	0	1	1
NM_011279	Rnf7	ring finger protein 7	1	0	0	1	1
NM_011281	Rorc	RAR-related orphan receptor gamma	0	0	1	1	1
NM_011294	Sub1	SUB1 homolog (S. cerevisiae)	1	0	0	1	1
NM_011302	Rs1	retinoschisis (X-linked, juvenile) 1 (human)	1	0	0	1	1
NM_011305	Rxra	retinoid X receptor alpha	1	0	0	1	1
NM_011330	Ccl11	small chemokine (C-C motif) ligand 11	1	0	0	1	1
NM_011334	Clcn4-2	chloride channel 4-2	1	0	0	1	1
NM_011338	Ccl9	chemokine (C-C motif) ligand 9	1	0	0	1	1
NM_011341	Sdf4	stromal cell derived factor 4	1	0	0	1	1
NM_011343	Sec61g	SEC61, gamma subunit	1	0	0	1	1
NM_011344	Sel1l	sel-1 suppressor of lin-12-like (C. elegans)	1	0	0	1	1
NM_011346	Sell	selectin, lymphocyte	1	0	0	1	1
NM_011348	Sema3e	sema domain, immunoglobulin domain (Ig), short basic domain, secreted, (semaphorin) 3E	1	0	0	1	1
NM_011349	Sema3f	sema domain, immunoglobulin domain (Ig), short basic domain, secreted, (semaphorin) 3F	1	0	0	1	1
NM_011354	Serf2	small EDRK-rich factor 2	1	0	0	1	1
NM_011368	Shc1	src homology 2 domain-containing transforming protein C1	1	0	0	1	1
NM_011372	St6galnac3	ST6 (alpha-N-acetyl-neuraminyl-2,3-beta-galactosyl-1,3)-N-acetylgalactosaminide alpha-2,6-sialyltransferase 3	1	0	0	1	1
NM_011373	St6galnac4	ST6 (alpha-N-acetyl-neuraminyl-2,3-beta-galactosyl-1,3)-N-acetylgalactosaminide alpha-2,6-sialyltransferase 4	1	0	0	1	1
NM_011376	Sim1	single-minded homolog 1 (Drosophila)	1	0	0	1	1
NM_011382	Six4	sine oculis-related homeobox 4 homolog (Drosophila)	1	0	0	1	1
NM_011385	Ski	ski sarcoma viral oncogene homolog (avian)	1	0	0	1	1
NM_011401	Slc2a3	solute carrier family 2 (facilitated glucose transporter), member 3	1	0	0	1	1
NM_011402	Slc34a2	solute carrier family 34 (sodium phosphate), member 2	1	0	0	1	1
NM_011406	Slc8a1	solute carrier family 8 (sodium/calcium exchanger), member 1	1	0	0	1	1
NM_011419	Jarid1d	jumonji, AT rich interactive domain 1D (Rbp2 like)	1	0	0	1	1
NM_011438	Sox12	SRY-box containing gene 12	1	0	0	1	1
NM_011439	Sox13	SRY-box containing gene 13	1	0	0	1	1
NM_011479	Sptlc2	serine palmitoyltransferase, long chain base subunit 2	1	0	0	1	1
NM_011480	Srebf1	sterol regulatory element binding transcription factor 1	1	0	0	1	1
NM_011484	Stam	signal transducing adaptor molecule (SH3 domain and ITAM motif) 1	1	0	0	1	1
NM_011485	Star	steroidogenic acute regulatory protein	1	0	0	1	1
NM_011486	Stat3	signal transducer and activator of transcription 3	1	0	0	1	1
NM_011488	Stat5a	signal transducer and activator of transcription 5A	1	0	0	1	1
NM_011489	Stat5b	signal transducer and activator of transcription 5B	1	0	0	1	1
NM_011494	Stk16	serine/threonine kinase 16	1	0	0	1	1
NM_011512	Surf4	surfeit gene 4	0	0	1	1	1
NM_011518	Syk	spleen tyrosine kinase	1	0	0	1	1
NM_011533	Tbx10	T-box 10	1	0	0	1	1
NM_011543	Skp1a	S-phase kinase-associated protein 1A	1	0	0	1	1
NM_011548	Tcfe2a	transcription factor E2a	1	0	0	1	1
NM_011549	Tcfeb	transcription factor EB	1	0	0	1	1
NM_011562	Tdgf1	teratocarcinoma-derived growth factor	1	0	0	1	1
NM_011580	Thbs1	thrombospondin 1	0	0	1	1	1
NM_011584	Nr1d2	nuclear receptor subfamily 1, group D, member 2	1	0	0	1	1
NM_011585	Tia1	cytotoxic granule-associated RNA binding protein 1	1	0	0	1	1
NM_011586	Myo18a	myosin XVIIIa	1	0	0	1	1
NM_011595	Timp3	tissue inhibitor of metalloproteinase 3	1	0	0	1	1
NM_011610	Tnfrsf1b	tumor necrosis factor receptor superfamily, member 1b	0	0	1	1	1
NM_011612	Tnfrsf9	tumor necrosis factor receptor superfamily, member 9	1	0	0	1	1
NM_011655	Tubb5	tubulin, beta 5	1	0	0	1	1
NM_011657	Tulp3	tubby-like protein 3	1	0	0	1	1
NM_011661	Tyr	tyrosinase	1	0	0	1	1
NM_011669	Usp12	ubiquitin specific peptidase 12	1	0	0	1	1
NM_011672	Ufd1l	ubiquitin fusion degradation 1 like	1	0	0	1	1
NM_011699	Lin7c	lin-7 homolog C (C. elegans)	1	0	0	1	1
NM_011703	Vipr1	vasoactive intestinal peptide receptor 1	1	0	0	1	1
NM_011705	Vrk1	vaccinia related kinase 1	1	0	0	1	1
NM_011718	Wnt10b	wingless related MMTV integration site 10b	1	0	0	1	1
NM_011719	Wnt9b	wingless-type MMTV integration site 9B	1	0	0	1	1
NM_011740	Ywhaz	tyrosine 3-monooxygenase/tryptophan 5-monooxygenase activation protein, zeta polypeptide	1	0	0	1	1
NM_011743	Zfp106	zinc finger protein 106	1	0	0	1	1
NM_011749	Zfp148	zinc finger protein 148	1	0	0	1	1
NM_011759	Zfp41	zinc finger protein 41	1	0	0	1	1
NM_011766	Zfpm2	zinc finger protein, multitype 2	1	0	0	1	1
NM_011768	Zfx	zinc finger protein X-linked	1	0	0	1	1
NM_011769	Zim1	zinc finger, imprinted 1	1	0	0	1	1
NM_011770	Ikzf2	IKAROS family zinc finger 2	1	0	0	1	1
NM_011771	Ikzf3	IKAROS family zinc finger 3	1	0	0	1	1
NM_011774	Slc30a4	solute carrier family 30 (zinc transporter), member 4	1	0	0	1	1
NM_011779	Coro1c	coronin, actin binding protein 1C	1	0	0	1	1
NM_011780	Adam23	a disintegrin and metallopeptidase domain 23	1	0	0	1	1
NM_011782	Adamts5	a disintegrin-like and metallopeptidase (reprolysin type) with thrombospondin type 1 motif, 5 (aggrecanase-2)	1	0	0	1	1
NM_011789	Apc2	adenomatosis polyposis coli 2	1	0	0	1	1
NM_011794	Bpnt1	bisphosphate 3"-nucleotidase 1	1	0	0	1	1
NM_011805	Dido1	death inducer-obliterator 1	1	0	0	1	1
NM_011812	Fbln5	fibulin 5	1	0	0	1	1
NM_011820	Ggt5	gamma-glutamyltransferase 5	1	0	0	1	1
NM_011821	Gpc6	glypican 6	1	0	0	1	1
NM_011828	Hs2st1	heparan sulfate 2-O-sulfotransferase 1	1	0	0	1	1
NM_011829	Impdh1	inosine 5"-phosphate dehydrogenase 1	0	0	1	1	1
NM_011838	Lynx1	Ly6/neurotoxin 1	1	0	0	1	1
NM_011843	Mbc2	membrane bound C2 domain containing protein	1	0	0	1	1
NM_011844	Mgll	monoglyceride lipase	1	0	0	1	1
NM_011851	Nt5e	5" nucleotidase, ecto	1	0	0	1	1
NM_011861	Pacsin1	protein kinase C and casein kinase substrate in neurons 1	1	0	0	1	1
NM_011866	Pde10a	phosphodiesterase 10A	1	0	0	1	1
NM_011881	Grk1	G protein-coupled receptor kinase 1	1	0	0	1	1
NM_011892	Sgcg	sarcoglycan, gamma (dystrophin-associated glycoprotein)	1	0	0	1	1
NM_011896	Spry1	sprouty homolog 1 (Drosophila)	1	0	0	1	1
NM_011898	Spry4	sprouty homolog 4 (Drosophila)	1	0	0	1	1
NM_011901	Taf7	TAF7 RNA polymerase II, TATA box binding protein (TBP)-associated factor	1	0	0	1	1
NM_011923	Angptl2	angiopoietin-like 2	1	0	0	1	1
NM_011924	Avpr1b	arginine vasopressin receptor 1B	1	0	0	1	1
NM_011933	Decr2	2-4-dienoyl-Coenzyme A reductase 2, peroxisomal	1	0	0	1	1
NM_011934	Esrrb	estrogen related receptor, beta	1	0	0	1	1
NM_011935	Esrrg	estrogen-related receptor gamma	1	0	0	1	1
NM_011941	Mapkbp1	mitogen-activated protein kinase binding protein 1	1	0	0	1	1
NM_011942	Lypla2	lysophospholipase 2	0	0	1	1	1
NM_011947	Map3k3	mitogen-activated protein kinase kinase kinase 3	0	0	1	1	1
NM_011949	Mapk1	mitogen-activated protein kinase 1	1	0	0	1	1
NM_011972	Poli	polymerase (DNA directed), iota	1	0	0	1	1
NM_011977	Slc27a1	solute carrier family 27 (fatty acid transporter), member 1	1	0	0	1	1
NM_011986	Ncdn	neurochondrin	1	0	0	1	1
NM_011989	Slc27a4	solute carrier family 27 (fatty acid transporter), member 4	1	0	0	1	1
NM_011990	Slc7a11	solute carrier family 7 (cationic amino acid transporter, y+ system), member 11	1	0	0	1	1
NM_011996	Adh4	alcohol dehydrogenase 4 (class II), pi polypeptide	1	0	0	1	1
NM_011997	Casp8ap2	caspase 8 associated protein 2	1	0	0	1	1
NM_012000	Cln8	ceroid-lipofuscinosis, neuronal 8	1	0	0	1	1
NM_012010	Eif2s3x	eukaryotic translation initiation factor 2, subunit 3, structural gene X-linked	1	0	0	1	1
NM_012017	Zfp346	zinc finger protein 346	1	0	0	1	1
NM_012027	Mprip	myosin phosphatase Rho interacting protein	1	0	0	1	1
NM_012032	Serinc3	serine incorporator 3	1	0	0	1	1
NM_012035	Trpc7	transient receptor potential cation channel, subfamily C, member 7	0	0	1	1	1
NM_012037	Vat1	vesicle amine transport protein 1 homolog (T californica)	1	0	0	1	1
NM_012045	Pla2g2f	phospholipase A2, group IIF	1	0	0	1	1
NM_012048	Polk	polymerase (DNA directed), kappa	1	0	0	1	1
NM_012052	Rps3	ribosomal protein S3	1	0	0	1	1
NM_013463	Gla	galactosidase, alpha	1	0	0	1	1
NM_013464	Ahr	aryl-hydrocarbon receptor	1	0	0	1	1
NM_013476	Ar	androgen receptor	1	0	0	1	1
NM_013488	Cd4	CD4 antigen	1	0	0	1	1
NM_013494	Cpe	carboxypeptidase E	1	0	0	1	1
NM_013500	Hapln1	hyaluronan and proteoglycan link protein 1	1	0	0	1	1
NM_013505	Dsc2	desmocollin 2	1	0	0	1	1
NM_013508	Elk3	ELK3, member of ETS oncogene family	1	0	0	1	1
NM_013510	Epb4.1l1	erythrocyte protein band 4.1-like 1	1	0	0	1	1
NM_013513	Epb4.2	erythrocyte protein band 4.2	1	0	0	1	1
NM_013517	Fcer2a	Fc receptor, IgE, low affinity II, alpha polypeptide	1	0	0	1	1
NM_013521	Fpr1	formyl peptide receptor 1	1	0	0	1	1
NM_013531	Gnb4	guanine nucleotide binding protein (G protein), beta 4	1	0	0	1	1
NM_013540	Gria2	glutamate receptor, ionotropic, AMPA2 (alpha 2)	1	0	0	1	1
NM_013586	Loxl3	lysyl oxidase-like 3	0	0	1	1	1
NM_013609	Ngf	nerve growth factor	1	0	0	1	1
NM_013629	Phtf1	putative homeodomain transcription factor 1	1	0	0	1	1
NM_013634	Med1	mediator complex subunit 1	1	0	0	1	1
NM_013655	Cxcl12	chemokine (C-X-C motif) ligand 12	1	0	0	1	1
NM_013657	Sema3c	sema domain, immunoglobulin domain (Ig), short basic domain, secreted, (semaphorin) 3C	1	0	0	1	1
NM_013659	Sema4b	sema domain, immunoglobulin domain (Ig), transmembrane domain (TM) and short cytoplasmic domain, (semaphorin) 4B	1	0	0	1	1
NM_013668	Jarid1c	jumonji, AT rich interactive domain 1C (Rbp2 like)	1	0	0	1	1
NM_013671	Sod2	superoxide dismutase 2, mitochondrial	1	0	0	1	1
NM_013672	Sp1	trans-acting transcription factor 1	1	0	0	1	1
NM_013674	Irf4	interferon regulatory factor 4	1	0	0	1	1
NM_013680	Syn1	synapsin I	1	0	0	1	1
NM_013685	Tcf4	transcription factor 4	1	0	0	1	1
NM_013700	Usp5	ubiquitin specific peptidase 5 (isopeptidase T)	1	0	0	1	1
NM_013703	Vldlr	very low density lipoprotein receptor	1	0	0	1	1
NM_013720	Mga	MAX gene associated	1	0	0	1	1
NM_013730	Slamf1	signaling lymphocytic activation molecule family member 1	1	0	0	1	1
NM_013731	Sgk2	serum/glucocorticoid regulated kinase 2	1	0	0	1	1
NM_013739	Dok3	docking protein 3	1	0	0	1	1
NM_013752	Nbn	nibrin	1	0	0	1	1
NM_013757	Sytl4	synaptotagmin-like 4	1	0	0	1	1
NM_013760	Dnajb9	DnaJ (Hsp40) homolog, subfamily B, member 9	0	0	1	1	1
NM_013761	Srr	serine racemase	1	0	0	1	1
NM_013771	Yme1l1	YME1-like 1 (S. cerevisiae)	1	0	0	1	1
NM_013776	Tcl1b5	T-cell leukemia/lymphoma 1B, 5	1	0	0	1	1
NM_013796	Nagpa	N-acetylglucosamine-1-phosphodiester alpha-N-acetylglucosaminidase	1	0	0	1	1
NM_013797	Slco1a1	solute carrier organic anion transporter family, member 1a1	1	0	0	1	1
NM_013814	Galnt1	UDP-N-acetyl-alpha-D-galactosamine:polypeptide N-acetylgalactosaminyltransferase 1	0	0	1	1	1
NM_013834	Sfrp1	secreted frizzled-related protein 1	1	0	0	1	1
NM_013835	Trove2	TROVE domain family, member 2	1	0	0	1	1
NM_013860	Limd1	LIM domains containing 1	0	0	1	1	1
NM_013868	Hspb7	heat shock protein family, member 7 (cardiovascular)	1	0	0	1	1
NM_013869	Tnfrsf19	tumor necrosis factor receptor superfamily, member 19	1	0	0	1	1
NM_013873	Sult4a1	sulfotransferase family 4A, member 1	1	0	0	1	1
NM_013874	Dpf1	D4, zinc and double PHD fingers family 1	1	0	0	1	1
NM_013881	Ulk2	Unc-51 like kinase 2 (C. elegans)	0	0	1	1	1
NM_013903	Mmp20	matrix metallopeptidase 20 (enamelysin)	1	0	0	1	1
NM_013905	Heyl	hairy/enhancer-of-split related with YRPW motif-like	1	0	0	1	1
NM_013912	Apln	apelin	1	0	0	1	1
NM_013914	Snai3	snail homolog 3 (Drosophila)	1	0	0	1	1
NM_013919	Usp21	ubiquitin specific peptidase 21	0	0	1	1	1
NM_013925	Adat1	adenosine deaminase, tRNA-specific 1	1	0	0	1	1
NM_013927	Cngb3	cyclic nucleotide gated channel beta 3	1	0	0	1	1
NM_013931	Mapk8ip3	mitogen-activated protein kinase 8 interacting protein 3	1	0	0	1	1
NM_015728	Slc33a1	solute carrier family 33 (acetyl-CoA transporter), member 1	1	0	0	1	1
NM_015730	Chrna4	cholinergic receptor, nicotinic, alpha polypeptide 4	1	0	0	1	1
NM_015733	Casp9	caspase 9	1	0	0	1	1
NM_015745	Rbp3	retinol binding protein 3, interstitial	1	0	0	1	1
NM_015749	Tcn2	transcobalamin 2	1	0	0	1	1
NM_015751	Abce1	ATP-binding cassette, sub-family E (OABP), member 1	1	0	0	1	1
NM_015754	Rbbp9	retinoblastoma binding protein 9	1	0	0	1	1
NM_015755	Hunk	hormonally upregulated Neu-associated kinase	1	0	0	1	1
NM_015760	Nox4	NADPH oxidase 4	1	0	0	1	1
NM_015764	Greb1	gene regulated by estrogen in breast cancer protein	1	0	0	1	1
NM_015802	Dlc1	deleted in liver cancer 1	1	0	0	1	1
NM_015819	Hs6st2	heparan sulfate 6-O-sulfotransferase 2	1	0	0	1	1
NM_015824	Orc3l	origin recognition complex, subunit 3-like (S. cerevisiae)	1	0	0	1	1
NM_015825	Sh3bgr	SH3-binding domain glutamic acid-rich protein	1	0	0	1	1
NM_016660	Hmga1	high mobility group AT-hook 1	1	0	0	1	1
NM_016674	Cldn1	claudin 1	1	0	0	1	1
NM_016676	Rab10	RAB10, member RAS oncogene family	1	0	0	1	1
NM_016690	Hnrpdl	heterogeneous nuclear ribonucleoprotein D-like	1	0	0	1	1
NM_016694	Park2	parkin	1	0	0	1	1
NM_016695	Mpp2	membrane protein, palmitoylated 2 (MAGUK p55 subfamily member 2)	1	0	0	1	1
NM_016704	C6	complement component 6	1	0	0	1	1
NM_016714	Nup50	nucleoporin 50	1	0	0	1	1
NM_016717	Scly	selenocysteine lyase	1	0	0	1	1
NM_016718	Ninj2	ninjurin 2	1	0	0	1	1
NM_016742	Cdc37	cell division cycle 37 homolog (S. cerevisiae)	1	0	0	1	1
NM_016745	Atp2a3	ATPase, Ca++ transporting, ubiquitous	1	0	0	1	1
NM_016782	Cntnap1	contactin associated protein-like 1	1	0	0	1	1
NM_016786	Ube2k	ubiquitin-conjugating enzyme E2K (UBC1 homolog, yeast)	1	0	0	1	1
NM_016791	Nfatc1	nuclear factor of activated T-cells, cytoplasmic, calcineurin-dependent 1	1	0	0	1	1
NM_016802	Rhoa	ras homolog gene family, member A	1	0	0	1	1
NM_016803	Chst3	carbohydrate (chondroitin 6/keratan) sulfotransferase 3	1	0	0	1	1
NM_016804	Mtx2	metaxin 2	1	0	0	1	1
NM_016807	Sdcbp	syndecan binding protein	1	0	0	1	1
NM_016809	Rbm3	RNA binding motif protein 3	1	0	0	1	1
NM_016866	Stk39	serine/threonine kinase 39, STE20/SPS1 homolog (yeast)	1	0	0	1	1
NM_016868	Hif3a	hypoxia inducible factor 3, alpha subunit	1	0	0	1	1
NM_016869	Corin	corin	1	0	0	1	1
NM_016882	Sart1	squamous cell carcinoma antigen recognized by T-cells 1	1	0	0	1	1
NM_016894	Ramp1	receptor (calcitonin) activity modifying protein 1	1	0	0	1	1
NM_016905	Galk1	galactokinase 1	1	0	0	1	1
NM_016908	Syt5	synaptotagmin V	1	0	0	1	1
NM_016912	Cdkl2	cyclin-dependent kinase-like 2 (CDC2-related kinase)	1	0	0	1	1
NM_016920	Atp6v0a1	ATPase, H+ transporting, lysosomal V0 subunit A1	1	0	0	1	1
NM_016961	Mapk9	mitogen-activated protein kinase 9	0	0	1	1	1
NM_016964	Stag3	stromal antigen 3	1	0	0	1	1
NM_016967	Olig2	oligodendrocyte transcription factor 2	1	0	0	1	1
NM_016972	Slc7a8	solute carrier family 7 (cationic amino acid transporter, y+ system), member 8	1	0	0	1	1
NM_017375	Ostf1	osteoclast stimulating factor 1	1	0	0	1	1
NM_017377	B4galt2	UDP-Gal:betaGlcNAc beta 1,4- galactosyltransferase, polypeptide 2	0	0	1	1	1
NM_017380	2014-09-09	septin 9	1	0	0	1	1
NM_017395	Rfx5	regulatory factor X, 5 (influences HLA class II expression)	1	0	0	1	1
NM_017469	Gucy1b3	guanylate cyclase 1, soluble, beta 3	1	0	0	1	1
NM_017477	Copg	coatomer protein complex, subunit gamma	1	0	0	1	1
NM_018737	Ctps2	cytidine 5"-triphosphate synthase 2	1	0	0	1	1
NM_018739	rp9	retinitis pigmentosa 9 (human)	1	0	0	1	1
NM_018741	Igfbpl1	insulin-like growth factor binding protein-like 1	1	0	0	1	1
NM_018743	Agpat6	1-acylglycerol-3-phosphate O-acyltransferase 6 (lysophosphatidic acid acyltransferase, zeta)	1	0	0	1	1
NM_018747	Akap7	A kinase (PRKA) anchor protein 7	1	0	0	1	1
NM_018753	Ywhab	tyrosine 3-monooxygenase/tryptophan 5-monooxygenase activation protein, beta polypeptide	1	0	0	1	1
NM_018760	Slc4a4	solute carrier family 4 (anion exchanger), member 4	1	0	0	1	1
NM_018766	Ntsr1	neurotensin receptor 1	1	0	0	1	1
NM_018768	Stx8	syntaxin 8	1	0	0	1	1
NM_018773	Skap2	src family associated phosphoprotein 2	1	0	0	1	1
NM_018778	Cldn8	claudin 8	1	0	0	1	1
NM_018790	Arc	activity regulated cytoskeletal-associated protein	1	0	0	1	1
NM_018793	Tyk2	tyrosine kinase 2	1	0	0	1	1
NM_018795	Abcc6	ATP-binding cassette, sub-family C (CFTR/MRP), member 6	1	0	0	1	1
NM_018804	Syt11	synaptotagmin XI	1	0	0	1	1
NM_018805	Hs3st3b1	heparan sulfate (glucosamine) 3-O-sulfotransferase 3B1	1	0	0	1	1
NM_018807	Plagl2	pleiomorphic adenoma gene-like 2	0	0	1	1	1
NM_018814	Pcnx	pecanex homolog (Drosophila)	1	0	0	1	1
NM_018862	Agpat1	1-acylglycerol-3-phosphate O-acyltransferase 1 (lysophosphatidic acid acyltransferase, alpha)	1	0	0	1	1
NM_018872	Tmem131	transmembrane protein 131	1	0	0	1	1
NM_018876	Fut2	fucosyltransferase 2	1	0	0	1	1
NM_018877	Setdb1	SET domain, bifurcated 1	1	0	0	1	1
NM_018878	Paxip1	PAX interacting (with transcription-activation domain) protein 1	1	0	0	1	1
NM_018883	Camkk1	calcium/calmodulin-dependent protein kinase kinase 1, alpha	1	0	0	1	1
NM_018884	Pdzrn3	PDZ domain containing RING finger 3	1	0	0	1	1
NM_019388	Cd86	CD86 antigen	1	0	0	1	1
NM_019391	Lsp1	lymphocyte specific 1	1	0	0	1	1
NM_019406	Fnbp1	formin binding protein 1	1	0	0	1	1
NM_019412	Prx	periaxin	1	0	0	1	1
NM_019421	Cd320	CD320 antigen	1	0	0	1	1
NM_019423	Elovl2	elongation of very long chain fatty acids (FEN1/Elo2, SUR4/Elo3, yeast)-like 2	1	0	0	1	1
NM_019424	Hps1	Hermansky-Pudlak syndrome 1 homolog (human)	1	0	0	1	1
NM_019440	Iigp2	interferon inducible GTPase 2	1	0	0	1	1
NM_019441	Ppt2	palmitoyl-protein thioesterase 2	1	0	0	1	1
NM_019449	Unc93b1	unc-93 homolog B1 (C. elegans)	1	0	0	1	1
NM_019451	Il1f5	interleukin 1 family, member 5 (delta)	1	0	0	1	1
NM_019454	Dll4	delta-like 4 (Drosophila)	1	0	0	1	1
NM_019455	Ptgds2	prostaglandin D2 synthase 2, hematopoietic	1	0	0	1	1
NM_019465	Crtam	cytotoxic and regulatory T cell molecule	1	0	0	1	1
NM_019483	Smad9	MAD homolog 9 (Drosophila)	1	0	0	1	1
NM_019510	Trpc3	transient receptor potential cation channel, subfamily C, member 3	1	0	0	1	1
NM_019517	Bace2	beta-site APP-cleaving enzyme 2	1	0	0	1	1
NM_019535	Sh3gl2	SH3-domain GRB2-like 2	1	0	0	1	1
NM_019540	Pfpl	pore forming protein-like	1	0	0	1	1
NM_019541	Cts8	cathepsin 8	1	0	0	1	1
NM_019547	Rbm38	RNA binding motif protein 38	1	0	0	1	1
NM_019553	Ddx21	DEAD (Asp-Glu-Ala-Asp) box polypeptide 21	1	0	0	1	1
NM_019571	Tspan5	tetraspanin 5	1	0	0	1	1
NM_019574	Patz1	POZ (BTB) and AT hook containing zinc finger 1	1	0	0	1	1
NM_019575	Scamp4	secretory carrier membrane protein 4	1	0	0	1	1
NM_019578	Extl1	exostoses (multiple)-like 1	1	0	0	1	1
NM_019581	Gtpbp2	GTP binding protein 2	1	0	0	1	1
NM_019586	Ube2j1	ubiquitin-conjugating enzyme E2, J1	1	0	0	1	1
NM_019588	Plce1	phospholipase C, epsilon 1	1	0	0	1	1
NM_019632	Napb	N-ethylmaleimide sensitive fusion protein attachment protein beta	1	0	0	1	1
NM_019634	Tspan7	tetraspanin 7	1	0	0	1	1
NM_019635	Stk3	serine/threonine kinase 3 (Ste20, yeast homolog)	1	0	0	1	1
NM_019642	Rpn2	ribophorin II	1	0	0	1	1
NM_019645	Pkp1	plakophilin 1	1	0	0	1	1
NM_019649	Clptm1	cleft lip and palate associated transmembrane protein 1	0	0	1	1	1
NM_019652	Asna1	arsA (bacterial) arsenite transporter, ATP-binding, homolog 1	1	0	0	1	1
NM_019654	Socs5	suppressor of cytokine signaling 5	1	0	0	1	1
NM_019660	Mycbp	c-myc binding protein	1	0	0	1	1
NM_019664	Kcnj15	potassium inwardly-rectifying channel, subfamily J, member 15	1	0	0	1	1
NM_019680	Elf4	E74-like factor 4 (ets domain transcription factor)	1	0	0	1	1
NM_019697	Kcnd2	potassium voltage-gated channel, Shal-related family, member 2	1	0	0	1	1
NM_019703	Pfkp	phosphofructokinase, platelet	1	0	0	1	1
NM_019731	Nme4	non-metastatic cells 4, protein expressed in	1	0	0	1	1
NM_019732	Runx3	runt related transcription factor 3	1	0	0	1	1
NM_019747	Zfp113	zinc finger protein 113	1	0	0	1	1
NM_019769	1500003O03Rik	RIKEN cDNA 1500003O03 gene	1	0	0	1	1
NM_019774	Akap8	A kinase (PRKA) anchor protein 8	1	0	0	1	1
NM_019777	Ikbke	inhibitor of kappaB kinase epsilon	0	0	1	1	1
NM_019788	Pldn	pallidin	1	0	0	1	1
NM_019802	Ggcx	gamma-glutamyl carboxylase	1	0	0	1	1
NM_019803	Ube2g2	ubiquitin-conjugating enzyme E2G 2	1	0	0	1	1
NM_019806	Vapb	vesicle-associated membrane protein, associated protein B and C	1	0	0	1	1
NM_019807	Acpp	acid phosphatase, prostate	1	0	0	1	1
NM_019810	Slc5a1	solute carrier family 5 (sodium/glucose cotransporter), member 1	1	0	0	1	1
NM_019816	Aatf	apoptosis antagonizing transcription factor	1	0	0	1	1
NM_019818	Timm22	translocase of inner mitochondrial membrane 22 homolog (yeast)	1	0	0	1	1
NM_019820	Cbln3	cerebellin 3 precursor protein	1	0	0	1	1
NM_019827	Gsk3b	glycogen synthase kinase 3 beta	0	0	1	1	1
NM_019866	Spib	Spi-B transcription factor (Spi-1/PU.1 related)	1	0	0	1	1
NM_019875	Abcb9	ATP-binding cassette, sub-family B (MDR/TAP), member 9	0	0	1	1	1
NM_019878	Sult1b1	sulfotransferase family 1B, member 1	1	0	0	1	1
NM_019922	Crtap	cartilage associated protein	0	0	1	1	1
NM_019924	Rps6ka4	ribosomal protein S6 kinase, polypeptide 4	1	0	0	1	1
NM_019925	Gpr132	G protein-coupled receptor 132	1	0	0	1	1
NM_019934	Sec1	secretory blood group 1	1	0	0	1	1
NM_019959	C1qtnf1	C1q and tumor necrosis factor related protein 1	1	0	0	1	1
NM_019965	Dnajb12	DnaJ (Hsp40) homolog, subfamily B, member 12	1	0	0	1	1
NM_019988	Gbl	G protein beta subunit-like	1	0	0	1	1
NM_019998	Alg2	asparagine-linked glycosylation 2 homolog (yeast, alpha-1,3-mannosyltransferase)	1	0	0	1	1
NM_019999	Pnkd	paroxysmal nonkinesiogenic dyskinesia	0	0	1	1	1
NM_020000	Med8	mediator of RNA polymerase II transcription, subunit 8 homolog (yeast)	1	0	0	1	1
NM_020028	Lpar2	lysophosphatidic acid receptor 2	1	0	0	1	1
NM_020036	Calm4	calmodulin 4	1	0	0	1	1
NM_020050	Tmem9b	TMEM9 domain family, member B	1	0	0	1	1
NM_020260	Cdgap	Cdc42 GTPase-activating protein	1	0	0	1	1
NM_020263	Cacna2d2	calcium channel, voltage-dependent, alpha 2/delta subunit 2	1	0	0	1	1
NM_020267	Trim44	tripartite motif-containing 44	1	0	0	1	1
NM_020273	Gmeb1	glucocorticoid modulatory element binding protein 1	1	0	0	1	1
NM_020274	Htr3b	5-hydroxytryptamine (serotonin) receptor 3B	1	0	0	1	1
NM_020275	Tnfrsf10b	tumor necrosis factor receptor superfamily, member 10b	1	0	0	1	1
NM_020278	Lgi1	leucine-rich repeat LGI family, member 1	1	0	0	1	1
NM_020493	Srf	serum response factor	1	0	0	1	1
NM_020497	Zfp276	zinc finger protein (C2H2 type) 276	1	0	0	1	1
NM_020507	Tob2	transducer of ERBB2, 2	0	0	1	1	1
NM_020517	Lenep	lens epithelial protein	1	0	0	1	1
NM_020520	Slc25a20	solute carrier family 25 (mitochondrial carnitine/acylcarnitine translocase), member 20	1	0	0	1	1
NM_020570	Xrcc2	X-ray repair complementing defective repair in Chinese hamster cells 2	1	0	0	1	1
NM_020577	As3mt	arsenic (+3 oxidation state) methyltransferase	1	0	0	1	1
NM_020585	Golga7	golgi autoantigen, golgin subfamily a, 7	1	0	0	1	1
NM_020599	Rlbp1	retinaldehyde binding protein 1	1	0	0	1	1
NM_020606	Parva	parvin, alpha	1	0	0	1	1
NM_020621	P2ry4	pyrimidinergic receptor P2Y, G-protein coupled, 4	1	0	0	1	1
NM_020625	Zbtb22	zinc finger and BTB domain containing 22	1	0	0	1	1
NM_021041	Abcc9	ATP-binding cassette, sub-family C (CFTR/MRP), member 9	1	0	0	1	1
NM_021042	Abcc9	ATP-binding cassette, sub-family C (CFTR/MRP), member 9	1	0	0	1	1
NM_021053	Slc46a2	solute carrier family 46, member 2	1	0	0	1	1
NM_021275	Kcna4	potassium voltage-gated channel, shaker-related subfamily, member 4	1	0	0	1	1
NM_021278	Tmsb4x	thymosin, beta 4, X chromosome	1	0	0	1	1
NM_021287	Spnb3	spectrin beta 3	1	0	0	1	1
NM_021293	Cd33	CD33 antigen	1	0	0	1	1
NM_021295	Lancl1	LanC (bacterial lantibiotic synthetase component C)-like 1	1	0	0	1	1
NM_021296	Grpel2	GrpE-like 2, mitochondrial	1	0	0	1	1
NM_021324	Ttyh1	tweety homolog 1 (Drosophila)	1	0	0	1	1
NM_021326	Rbak	RB-associated KRAB repressor	1	0	0	1	1
NM_021328	Bin3	bridging integrator 3	0	0	1	1	1
NM_021331	G6pc2	glucose-6-phosphatase, catalytic, 2	1	0	0	1	1
NM_021334	Itgax	integrin alpha X	1	0	0	1	1
NM_021355	Fmod	fibromodulin	1	0	0	1	1
NM_021364	Clec5a	C-type lectin domain family 5, member a	1	0	0	1	1
NM_021369	Chrna6	cholinergic receptor, nicotinic, alpha polypeptide 6	1	0	0	1	1
NM_021389	Sh3kbp1	SH3-domain kinase binding protein 1	1	0	0	1	1
NM_021394	Zbp1	Z-DNA binding protein 1	1	0	0	1	1
NM_021402	Ube2j2	ubiquitin-conjugating enzyme E2, J2 homolog (yeast)	1	0	0	1	1
NM_021407	Trem3	triggering receptor expressed on myeloid cells 3	1	0	0	1	1
NM_021412	Mmp19	matrix metallopeptidase 19	1	0	0	1	1
NM_021414	Ahcyl2	S-adenosylhomocysteine hydrolase-like 2	1	0	0	1	1
NM_021416	9630031F12Rik	RIKEN cDNA 9630031F12 gene	1	0	0	1	1
NM_021422	Dnaja4	DnaJ (Hsp40) homolog, subfamily A, member 4	1	0	0	1	1
NM_021431	Nudt11	nudix (nucleoside diphosphate linked moiety X)-type motif 11	1	0	0	1	1
NM_021435	Slc35b4	solute carrier family 35, member B4	1	0	0	1	1
NM_021461	Mknk1	MAP kinase-interacting serine/threonine kinase 1	1	0	0	1	1
NM_021475	Adamdec1	ADAM-like, decysin 1	1	0	0	1	1
NM_021477	A2bp1	ataxin 2 binding protein 1	0	0	1	1	1
NM_021481	Treh	trehalase (brush-border membrane glycoprotein)	1	0	0	1	1
NM_021491	Smpd3	sphingomyelin phosphodiesterase 3, neutral	1	0	0	1	1
NM_021501	Pias4	protein inhibitor of activated STAT 4	1	0	0	1	1
NM_021517	Pdzk1	PDZ domain containing 1	1	0	0	1	1
NM_021523	Huwe1	HECT, UBA and WWE domain containing 1	1	0	0	1	1
NM_021530	Slc4a8	solute carrier family 4 (anion exchanger), member 8	1	0	0	1	1
NM_021544	Scn5a	sodium channel, voltage-gated, type V, alpha	1	0	0	1	1
NM_021547	Stard3	START domain containing 3	1	0	0	1	1
NM_021552	5730427N09Rik	RIKEN cDNA 5730427N09 gene	1	0	0	1	1
NM_021563	Erbb2ip	Erbb2 interacting protein	1	0	0	1	1
NM_021565	Midn	midnolin	1	0	0	1	1
NM_021610	Gpa33	glycoprotein A33 (transmembrane)	1	0	0	1	1
NM_021716	Fign	fidgetin	0	0	1	1	1
NM_021877	Hr	hairless	1	0	0	1	1
NM_021889	Syt9	synaptotagmin IX	1	0	0	1	1
NM_021893	Cd274	CD274 antigen	1	0	0	1	1
NM_021895	Actn4	actinin alpha 4	1	0	0	1	1
NM_021896	Gucy1a3	guanylate cyclase 1, soluble, alpha 3	1	0	0	1	1
NM_021897	Trp53inp1	transformation related protein 53 inducible nuclear protein 1	1	0	0	1	1
NM_022004	Fxyd6	FXYD domain-containing ion transport regulator 6	1	0	0	1	1
NM_022022	Ube4b	ubiquitination factor E4B, UFD2 homolog (S. cerevisiae)	1	0	0	1	1
NM_022025	Slc5a7	solute carrier family 5 (choline transporter), member 7	1	0	0	1	1
NM_022305	B4galt1	UDP-Gal:betaGlcNAc beta 1,4- galactosyltransferase, polypeptide 1	1	0	0	1	1
NM_022315	Smoc2	SPARC related modular calcium binding 2	1	0	0	1	1
NM_022316	Smoc1	SPARC related modular calcium binding 1	1	0	0	1	1
NM_022317	Slc28a3	solute carrier family 28 (sodium-coupled nucleoside transporter), member 3	1	0	0	1	1
NM_022320	Gpr35	G protein-coupled receptor 35	1	0	0	1	1
NM_022324	Sdf2l1	stromal cell-derived factor 2-like 1	1	0	0	1	1
NM_022327	Ralb	v-ral simian leukemia viral oncogene homolog B (ras related)	1	0	0	1	1
NM_022408	Es2el	expressed sequence 2 embryonic lethal	1	0	0	1	1
NM_022413	Trpv6	transient receptor potential cation channel, subfamily V, member 6	1	0	0	1	1
NM_022415	Ptges	prostaglandin E synthase	1	0	0	1	1
NM_022723	Scube1	signal peptide, CUB domain, EGF-like 1	1	0	0	1	1
NM_022980	Rcan3	regulator of calcineurin 3	1	0	0	1	1
NM_022981	Zfp110	zinc finger protein 110	1	0	0	1	1
NM_022989	Arl6ip6	ADP-ribosylation factor-like 6 interacting protein 6	1	0	0	1	1
NM_023043	Prnd	prion protein dublet	1	0	0	1	1
NM_023045	Xpo7	exportin 7	1	0	0	1	1
NM_023046	Asb1	ankyrin repeat and SOCS box-containing protein 1	1	0	0	1	1
NM_023065	Ifi30	interferon gamma inducible protein 30	1	0	0	1	1
NM_023115	Pcdh15	protocadherin 15	1	0	0	1	1
NM_023118	Dab2	disabled homolog 2 (Drosophila)	1	0	0	1	1
NM_023126	Rab8a	RAB8A, member RAS oncogene family	1	0	0	1	1
NM_023129	Pln	phospholamban	1	0	0	1	1
NM_023141	Tor3a	torsin family 3, member A	1	0	0	1	1
NM_023146	Ranbp17	RAN binding protein 17	1	0	0	1	1
NM_023200	Ppp1r7	protein phosphatase 1, regulatory (inhibitor) subunit 7	1	0	0	1	1
NM_023217	Pgpep1	pyroglutamyl-peptidase I	1	0	0	1	1
NM_023240	Eef1d	eukaryotic translation elongation factor 1 delta (guanine nucleotide exchange protein)	1	0	0	1	1
NM_023258	Pycard	PYD and CARD domain containing	1	0	0	1	1
NM_023281	Sdha	succinate dehydrogenase complex, subunit A, flavoprotein (Fp)	1	0	0	1	1
NM_023317	Nde1	nuclear distribution gene E homolog 1 (A nidulans)	1	0	0	1	1
NM_023333	2210010C04Rik	RIKEN cDNA 2210010C04 gene	1	0	0	1	1
NM_023348	Snap29	synaptosomal-associated protein 29	1	0	0	1	1
NM_023371	Pin1	protein (peptidyl-prolyl cis/trans isomerase) NIMA-interacting 1	1	0	0	1	1
NM_023403	Mesdc2	mesoderm development candidate 2	1	0	0	1	1
NM_023409	Npc2	Niemann Pick type C2	1	0	0	1	1
NM_023500	Xk	Kell blood group precursor (McLeod phenotype) homolog	1	0	0	1	1
NM_023503	Ing2	inhibitor of growth family, member 2	1	0	0	1	1
NM_023505	Glrx2	glutaredoxin 2 (thioltransferase)	1	0	0	1	1
NM_023523	Pecr	peroxisomal trans-2-enoyl-CoA reductase	1	0	0	1	1
NM_023526	Nkiras1	NFKB inhibitor interacting Ras-like protein 1	1	0	0	1	1
NM_023537	Rab3b	RAB3B, member RAS oncogene family	1	0	0	1	1
NM_023585	Ube2v2	ubiquitin-conjugating enzyme E2 variant 2	1	0	0	1	1
NM_023598	Arid5b	AT rich interactive domain 5B (Mrf1 like)	1	0	0	1	1
NM_023624	Lrat	lecithin-retinol acyltransferase (phosphatidylcholine-retinol-O-acyltransferase)	1	0	0	1	1
NM_023635	Rab27a	RAB27A, member RAS oncogene family	1	0	0	1	1
NM_023651	Pex13	peroxisomal biogenesis factor 13	1	0	0	1	1
NM_023668	Ndel1	nuclear distribution gene E-like homolog 1 (A. nidulans)	1	0	0	1	1
NM_023737	Ehhadh	enoyl-Coenzyme A, hydratase/3-hydroxyacyl Coenzyme A dehydrogenase	1	0	0	1	1
NM_023755	Tcfcp2l1	transcription factor CP2-like 1	1	0	0	1	1
NM_023813	Camk2d	calcium/calmodulin-dependent protein kinase II, delta	1	0	0	1	1
NM_023831	1500035H01Rik	RIKEN cDNA 1500035H01 gene	1	0	0	1	1
NM_023850	Chst1	carbohydrate (keratan sulfate Gal-6) sulfotransferase 1	1	0	0	1	1
NM_023908	Slco3a1	solute carrier organic anion transporter family, member 3a1	1	0	0	1	1
NM_024201	Ccdc127	coiled-coil domain containing 127	1	0	0	1	1
NM_024215	Zfp593	zinc finger protein 593	1	0	0	1	1
NM_024223	Crip2	cysteine rich protein 2	1	0	0	1	1
NM_024229	Pcyt2	phosphate cytidylyltransferase 2, ethanolamine	1	0	0	1	1
NM_024231	Zfpl1	zinc finger like protein 1	1	0	0	1	1
NM_024241	Kif24	kinesin family member 24	1	0	0	1	1
NM_024244	1200015N20Rik	RIKEN cDNA 1200015N20 gene	1	0	0	1	1
NM_024246	Tmem79	transmembrane protein 79	1	0	0	1	1
NM_024270	Stard3nl	STARD3 N-terminal like	0	0	1	1	1
NM_024273	4930455C21Rik	RIKEN cDNA 4930455C21 gene	1	0	0	1	1
NM_024433	Mtap	methylthioadenosine phosphorylase	1	0	0	1	1
NM_024474	Emid2	EMI domain containing 2	1	0	0	1	1
NM_024478	Grpel1	GrpE-like 1, mitochondrial	1	0	0	1	1
NM_025282	Mef2c	myocyte enhancer factor 2C	1	0	0	1	1
NM_025292	Synj2bp	synaptojanin 2 binding protein	1	0	0	1	1
NM_025301	Mrpl17	mitochondrial ribosomal protein L17	1	0	0	1	1
NM_025303	Stau2	staufen (RNA binding protein) homolog 2 (Drosophila)	1	0	0	1	1
NM_025330	Hsd17b14	hydroxysteroid (17-beta) dehydrogenase 14	1	0	0	1	1
NM_025356	Ube2d3	ubiquitin-conjugating enzyme E2D 3 (UBC4/5 homolog, yeast)	1	0	0	1	1
NM_025368	Josd2	Josephin domain containing 2	1	0	0	1	1
NM_025379	Cox7b	cytochrome c oxidase subunit VIIb	1	0	0	1	1
NM_025389	Anapc11	anaphase promoting complex subunit 11 homolog (yeast)	1	0	0	1	1
NM_025390	Pop4	processing of precursor 4, ribonuclease P/MRP family, (S. cerevisiae)	1	0	0	1	1
NM_025404	Arl4d	ADP-ribosylation factor-like 4D	1	0	0	1	1
NM_025418	Vta1	Vps20-associated 1 homolog (S. cerevisiae)	1	0	0	1	1
NM_025430	Mrpl35	mitochondrial ribosomal protein L35	1	0	0	1	1
NM_025454	Ing5	inhibitor of growth family, member 5	1	0	0	1	1
NM_025461	1810020G14Rik	RIKEN cDNA 1810020G14 gene	1	0	0	1	1
NM_025479	2810021B07Rik	RIKEN cDNA 2810021B07 gene	1	0	0	1	1
NM_025500	Mrpl37	mitochondrial ribosomal protein L37	1	0	0	1	1
NM_025505	Blzf1	basic leucine zipper nuclear factor 1	1	0	0	1	1
NM_025521	2310011J03Rik	RIKEN cDNA 2310011J03 gene	1	0	0	1	1
NM_025545	Aptx	aprataxin	1	0	0	1	1
NM_025559	1810046J19Rik	RIKEN cDNA 1810046J19 gene	1	0	0	1	1
NM_025578	Mrps25	mitochondrial ribosomal protein S25	1	0	0	1	1
NM_025610	Asrgl1	asparaginase like 1	1	0	0	1	1
NM_025617	2210012G02Rik	RIKEN cDNA 2210012G02 gene	1	0	0	1	1
NM_025642	2610039C10Rik	RIKEN cDNA 2610039C10 gene	1	0	0	1	1
NM_025648	Farsa	phenylalanyl-tRNA synthetase, alpha subunit	1	0	0	1	1
NM_025651	Aste1	asteroid homolog 1 (Drosophila)	1	0	0	1	1
NM_025659	Abi3	ABI gene family, member 3	1	0	0	1	1
NM_025670	5730403B10Rik	RIKEN cDNA 5730403B10 gene	1	0	0	1	1
NM_025673	Golph3	golgi phosphoprotein 3	1	0	0	1	1
NM_025675	Atpbd4	ATP binding domain 4	1	0	0	1	1
NM_025685	Col27a1	collagen, type XXVII, alpha 1	1	0	0	1	1
NM_025716	Spryd4	SPRY domain containing 4	1	0	0	1	1
NM_025725	Ccdc96	coiled-coil domain containing 96	1	0	0	1	1
NM_025728	Spag16	sperm associated antigen 16	1	0	0	1	1
NM_025729	Map3k7ip3	mitogen-activated protein kinase kinase kinase 7 interacting protein 3	1	0	0	1	1
NM_025746	4933415F23Rik	RIKEN cDNA 4933415F23 gene	1	0	0	1	1
NM_025757	4933439F18Rik	RIKEN cDNA 4933439F18 gene	1	0	0	1	1
NM_025760	Ptplad2	protein tyrosine phosphatase-like A domain containing 2	1	0	0	1	1
NM_025768	Grtp1	GH regulated TBC protein 1	1	0	0	1	1
NM_025778	Bcl2l14	Bcl2-like 14 (apoptosis facilitator)	1	0	0	1	1
NM_025780	Thap2	THAP domain containing, apoptosis associated protein 2	1	0	0	1	1
NM_025781	Tmem170	transmembrane protein 170	1	0	0	1	1
NM_025793	Wdr45l	Wdr45 like	1	0	0	1	1
NM_025807	Slc16a9	solute carrier family 16 (monocarboxylic acid transporters), member 9	0	0	1	1	1
NM_025809	Clec14a	C-type lectin domain family 14, member a	1	0	0	1	1
NM_025815	Cpne8	copine VIII	1	0	0	1	1
NM_025823	Pcyox1	prenylcysteine oxidase 1	1	0	0	1	1
NM_025834	Proz	protein Z, vitamin K-dependent plasma glycoprotein	1	0	0	1	1
NM_025835	Pccb	propionyl Coenzyme A carboxylase, beta polypeptide	1	0	0	1	1
NM_025837	Mpi	mannose phosphate isomerase	1	0	0	1	1
NM_025844	Chordc1	cysteine and histidine-rich domain (CHORD)-containing, zinc-binding protein 1	1	0	0	1	1
NM_025852	Rexo1	REX1, RNA exonuclease 1 homolog (S. cerevisiae)	1	0	0	1	1
NM_025853	Dsn1	DSN1, MIND kinetochore complex component, homolog (S. cerevisiae)	1	0	0	1	1
NM_025855	Echdc1	enoyl Coenzyme A hydratase domain containing 1	1	0	0	1	1
NM_025862	Acad8	acyl-Coenzyme A dehydrogenase family, member 8	1	0	0	1	1
NM_025879	2410002O22Rik	RIKEN cDNA 2410002O22 gene	1	0	0	1	1
NM_025885	Med19	mediator of RNA polymerase II transcription, subunit 19 homolog (yeast)	1	0	0	1	1
NM_025897	1500003O22Rik	RIKEN cDNA 1500003O22 gene	1	0	0	1	1
NM_025901	Polr3k	polymerase (RNA) III (DNA directed) polypeptide K	1	0	0	1	1
NM_025929	2010109I03Rik	RIKEN cDNA 2010109I03 gene	1	0	0	1	1
NM_025937	Nkap	NFKB activating protein	1	0	0	1	1
NM_025943	Dzip1	DAZ interacting protein 1	0	0	1	1	1
NM_025944	2810432L12Rik	RIKEN cDNA 2810432L12 gene	1	0	0	1	1
NM_025950	Cdc37l1	cell division cycle 37 homolog (S. cerevisiae)-like 1	1	0	0	1	1
NM_025951	Pi4k2b	phosphatidylinositol 4-kinase type 2 beta	1	0	0	1	1
NM_025957	Ceacam14	CEA-related cell adhesion molecule 14	1	0	0	1	1
NM_025958	Cand2	cullin-associated and neddylation-dissociated 2 (putative)	1	0	0	1	1
NM_025962	Mmachc	methylmalonic aciduria cblC type, with homocystinuria	1	0	0	1	1
NM_025967	D16Ertd472e	DNA segment, Chr 16, ERATO Doi 472, expressed	1	0	0	1	1
NM_025975	Dynlt3	dynein light chain Tctex-type 3	1	0	0	1	1
NM_025980	Nrarp	Notch-regulated ankyrin repeat protein	1	0	0	1	1
NM_025982	Tspan31	tetraspanin 31	1	0	0	1	1
NM_025994	Efhd2	EF hand domain containing 2	1	0	0	1	1
NM_026000	Psmd9	proteasome (prosome, macropain) 26S subunit, non-ATPase, 9	1	0	0	1	1
NM_026011	Arl8b	ADP-ribosylation factor-like 8B	1	0	0	1	1
NM_026033	Gatad1	GATA zinc finger domain containing 1	1	0	0	1	1
NM_026039	Med18	mediator of RNA polymerase II transcription, subunit 18 homolog (yeast)	1	0	0	1	1
NM_026042	Med29	mediator complex subunit 29	1	0	0	1	1
NM_026046	Zfp329	zinc finger protein 329	1	0	0	1	1
NM_026048	2810452K22Rik	RIKEN cDNA 2810452K22 gene	1	0	0	1	1
NM_026054	2810474O19Rik	RIKEN cDNA 2810474O19 gene	1	0	0	1	1
NM_026058	Lass4	LAG1 homolog, ceramide synthase 4	1	0	0	1	1
NM_026064	2900073G15Rik	RIKEN cDNA 2900073G15 gene	1	0	0	1	1
NM_026075	Sfrs12ip1	SFRS12-interacting protein 1	0	0	1	1	1
NM_026080	Mrps24	mitochondrial ribosomal protein S24	1	0	0	1	1
NM_026085	3110049J23Rik	RIKEN cDNA 3110049J23 gene	1	0	0	1	1
NM_026105	1700093K21Rik	RIKEN cDNA 1700093K21 gene	1	0	0	1	1
NM_026111	Qpctl	glutaminyl-peptide cyclotransferase-like	1	0	0	1	1
NM_026121	Bag4	BCL2-associated athanogene 4	1	0	0	1	1
NM_026130	Srpr	signal recognition particle receptor ("docking protein")	1	0	0	1	1
NM_026144	Dhdds	dehydrodolichyl diphosphate synthase	1	0	0	1	1
NM_026145	Kctd10	potassium channel tetramerisation domain containing 10	1	0	0	1	1
NM_026148	Lims1	LIM and senescent cell antigen-like domains 1	1	0	0	1	1
NM_026150	4921536K21Rik	RIKEN cDNA 4921536K21 gene	1	0	0	1	1
NM_026162	Plxdc2	plexin domain containing 2	1	0	0	1	1
NM_026167	Klhl13	kelch-like 13 (Drosophila)	1	0	0	1	1
NM_026168	Ergic2	ERGIC and golgi 2	1	0	0	1	1
NM_026170	Ergic1	endoplasmic reticulum-golgi intermediate compartment (ERGIC) 1	0	0	1	1	1
NM_026177	1200011I18Rik	RIKEN cDNA 1200011I18 gene	1	0	0	1	1
NM_026186	Ccdc49	coiled-coil domain containing 49	1	0	0	1	1
NM_026198	Tmem167b	transmembrane protein 167B	1	0	0	1	1
NM_026228	Slc39a8	solute carrier family 39 (metal ion transporter), member 8	1	0	0	1	1
NM_026234	Pigm	phosphatidylinositol glycan anchor biosynthesis, class M	1	0	0	1	1
NM_026236	Wdr48	WD repeat domain 48	1	0	0	1	1
NM_026262	4930524B15Rik	RIKEN cDNA 4930524B15 gene	1	0	0	1	1
NM_026263	4930519G04Rik	RIKEN cDNA 4930519G04 gene	1	0	0	1	1
NM_026268	Dusp6	dual specificity phosphatase 6	1	0	0	1	1
NM_026273	4930453N24Rik	RIKEN cDNA 4930453N24 gene	1	0	0	1	1
NM_026277	Nob1	NIN1/RPN12 binding protein 1 homolog (S. cerevisiae)	1	0	0	1	1
NM_026278	Lrp2bp	Lrp2 binding protein	1	0	0	1	1
NM_026280	Mxra7	matrix-remodelling associated 7	1	0	0	1	1
NM_026283	Samd8	sterile alpha motif domain containing 8	1	0	0	1	1
NM_026312	2610029G23Rik	RIKEN cDNA 2610029G23 gene	1	0	0	1	1
NM_026316	Aldh3b1	aldehyde dehydrogenase 3 family, member B1	1	0	0	1	1
NM_026331	Slc25a37	solute carrier family 25, member 37	1	0	0	1	1
NM_026345	Mansc1	MANSC domain containing 1	1	0	0	1	1
NM_026348	Itgb3bp	integrin beta 3 binding protein (beta3-endonexin)	1	0	0	1	1
NM_026350	Ccdc130	coiled-coil domain containing 130	1	0	0	1	1
NM_026353	4930570C03Rik	RIKEN cDNA 4930570C03 gene	1	0	0	1	1
NM_026369	Arpc5	actin related protein 2/3 complex, subunit 5	1	0	0	1	1
NM_026380	Rgs8	regulator of G-protein signaling 8	1	0	0	1	1
NM_026390	Ubxd2	UBX domain containing 2	0	0	1	1	1
NM_026391	Ppp2r2d	protein phosphatase 2, regulatory subunit B, delta isoform	1	0	0	1	1
NM_026396	Bxdc2	brix domain containing 2	1	0	0	1	1
NM_026401	Mrp63	mitochondrial ribosomal protein 63	1	0	0	1	1
NM_026406	Zfp364	zinc finger protein 364	1	0	0	1	1
NM_026410	Cdca5	cell division cycle associated 5	1	0	0	1	1
NM_026422	Mrrf	mitochondrial ribosome recycling factor	1	0	0	1	1
NM_026423	2410018C20Rik	RIKEN cDNA 2410018C20 gene	1	0	0	1	1
NM_026435	Ufm1	ubiquitin-fold modifier 1	1	0	0	1	1
NM_026445	Sumf2	sulfatase modifying factor 2	1	0	0	1	1
NM_026450	Zfp169	zinc finger protein 169	1	0	0	1	1
NM_026485	Trabd	TraB domain containing	1	0	0	1	1
NM_026493	Cspp1	centrosome and spindle pole associated protein 1	1	0	0	1	1
NM_026495	Btbd14a	BTB (POZ) domain containing 14A	1	0	0	1	1
NM_026502	1110004E09Rik	RIKEN cDNA 1110004E09 gene	1	0	0	1	1
NM_026509	2310039E09Rik	RIKEN cDNA 2310039E09 gene	1	0	0	1	1
NM_026521	Zfp706	zinc finger protein 706	1	0	0	1	1
NM_026532	Nutf2	nuclear transport factor 2	1	0	0	1	1
NM_026534	3110003A22Rik	RIKEN cDNA 3110003A22 gene	1	0	0	1	1
NM_026538	Ddx56	DEAD (Asp-Glu-Ala-Asp) box polypeptide 56	1	0	0	1	1
NM_026551	Dcakd	dephospho-CoA kinase domain containing	1	0	0	1	1
NM_026570	Yeats4	YEATS domain containing 4	1	0	0	1	1
NM_026580	Otub2	OTU domain, ubiquitin aldehyde binding 2	1	0	0	1	1
NM_026609	Leprotl1	leptin receptor overlapping transcript-like 1	0	0	1	1	1
NM_026615	Urm1	ubiquitin related modifier 1 homolog (S. cerevisiae)	1	0	0	1	1
NM_026635	5730536A07Rik	RIKEN cDNA 5730536A07 gene	0	0	1	1	1
NM_026638	Cdipt	CDP-diacylglycerol--inositol 3-phosphatidyltransferase (phosphatidylinositol synthase)	1	0	0	1	1
[truncated: 1,359 more rows]

## Sheet: miR-101a-3p
# "1" : interaction predicted; "0" : interaction not predicted.
Refseq	Symbol	Description	miranda	mirtarget2	pictar	pita	rnahybrid
NM_001005605	Aebp2	AE binding protein 2	1	1	1	1	1
NM_001005868	Erbb2ip	Erbb2 interacting protein	1	1	1	1	1
NM_001008785	Kbtbd8	kelch repeat and BTB (POZ) domain containing 8	1	1	1	1	1
NM_001034874	Gm879	gene model 879, (NCBI)	1	1	1	1	1
NM_001038993	Rnf38	ring finger protein 38	1	1	1	1	1
NM_001039089	Sel1l	sel-1 suppressor of lin-12-like (C. elegans)	1	1	1	1	1
NM_001039179	Bicd2	bicaudal D homolog 2 (Drosophila)	1	1	1	1	1
NM_007872	Dnmt3a	DNA methyltransferase 3A	1	1	1	1	1
NM_007971	Ezh2	enhancer of zeste homolog 2 (Drosophila)	1	1	1	1	1
NM_008216	Has2	hyaluronan synthase 2	1	1	1	1	1
NM_008516	Lrrn1	leucine rich repeat protein 1, neuronal	1	1	1	1	1
NM_008709	Mycn	v-myc myelocytomatosis viral related oncogene, neuroblastoma derived (avian)	1	1	1	1	1
NM_008751	Nxph1	neurexophilin 1	1	1	1	1	1
NM_008996	Rab1	RAB1, member RAS oncogene family	1	1	1	1	1
NM_009124	Atxn1	ataxin 1	1	1	1	1	1
NM_009199	Slc1a1	solute carrier family 1 (neuronal/epithelial high affinity glutamate transporter, system Xag), member 1	1	1	1	1	1
NM_009274	Srpk2	serine/arginine-rich protein specific kinase 2	1	1	1	1	1
NM_009681	Ap3s1	adaptor-related protein complex 3, sigma 1 subunit	1	1	1	1	1
NM_009866	Cdh11	cadherin 11	1	1	1	1	1
NM_009925	Col10a1	collagen, type X, alpha 1	1	1	1	1	1
NM_010164	Eya1	eyes absent 1 homolog (Drosophila)	1	1	1	1	1
NM_010264	Nr6a1	nuclear receptor subfamily 6, group A, member 1	1	1	1	1	1
NM_010288	Gja1	gap junction protein, alpha 1	1	1	1	1	1
NM_010595	Kcna1	potassium voltage-gated channel, shaker-related subfamily, member 1	1	1	1	1	1
NM_010894	Neurod1	neurogenic differentiation 1	1	1	1	1	1
NM_011198	Ptgs2	prostaglandin-endoperoxide synthase 2	1	1	1	1	1
NM_011264	Rev3l	REV3-like, catalytic subunit of DNA polymerase zeta RAD54 like (S. cerevisiae)	1	1	1	1	1
NM_011344	Sel1l	sel-1 suppressor of lin-12-like (C. elegans)	1	1	1	1	1
NM_011546	Zeb1	zinc finger E-box binding homeobox 1	1	1	1	1	1
NM_011584	Nr1d2	nuclear receptor subfamily 1, group D, member 2	1	1	1	1	1
NM_012035	Trpc7	transient receptor potential cation channel, subfamily C, member 7	1	1	1	1	1
NM_013830	Prpf4b	PRP4 pre-mRNA processing factor 4 homolog B (yeast)	1	1	1	1	1
NM_016984	Trpc4	transient receptor potential cation channel, subfamily C, member 4	1	1	1	1	1
NM_019796	Syncrip	synaptotagmin binding, cytoplasmic RNA interacting protein	1	1	1	1	1
NM_019912	Ube2d2	ubiquitin-conjugating enzyme E2D 2	1	1	1	1	1
NM_021881	Qk	quaking	1	1	1	1	1
NM_023794	Etv5	ets variant gene 5	1	1	1	1	1
NM_024282	5830417C01Rik	RIKEN cDNA 5830417C01 gene	1	1	1	1	1
NM_024457	Rap1b	RAS related protein 1b	1	1	1	1	1
NM_025283	Mobkl3	MOB1, Mps One Binder kinase activator-like 3 (yeast)	1	1	1	1	1
NM_027554	Usp38	ubiquitin specific peptidase 38	1	1	1	1	1
NM_028523	Dcbld2	discoidin, CUB and LCCL domain containing 2	1	1	1	1	1
NM_028724	Rin2	Ras and Rab interactor 2	1	1	1	1	1
NM_029789	Lass2	LAG1 homolog, ceramide synthase 2	1	1	1	1	1
NM_029791	Bicd2	bicaudal D homolog 2 (Drosophila)	1	1	1	1	1
NM_030127	Htra3	HtrA serine peptidase 3	1	1	1	1	1
NM_030708	Zfhx4	zinc finger homeodomain 4	1	1	1	1	1
NM_053123	Smarca1	SWI/SNF related, matrix associated, actin dependent regulator of chromatin, subfamily a, member 1	1	1	1	1	1
NM_054040	Tulp4	tubby like protein 4	1	1	1	1	1
NM_133722	2210412D01Rik	RIKEN cDNA 2210412D01 gene	1	1	1	1	1
NM_133834	Hnrnpf	heterogeneous nuclear ribonucleoprotein F	1	1	1	1	1
NM_134015	Fbxw11	F-box and WD-40 domain protein 11	1	1	1	1	1
NM_144557	Myrip	myosin VIIA and Rab interacting protein	1	1	1	1	1
NM_144812	Tnrc6b	trinucleotide repeat containing 6b	1	1	1	1	1
NM_145066	Gpr85	G protein-coupled receptor 85	1	1	1	1	1
NM_145420	Ube2d1	ubiquitin-conjugating enzyme E2D 1, UBC4/5 homolog (yeast)	1	1	1	1	1
NM_145534	Btbd3	BTB (POZ) domain containing 3	1	1	1	1	1
NM_145962	Pank3	pantothenate kinase 3	1	1	1	1	1
NM_146096	5730446C15Rik	RIKEN cDNA 5730446C15 gene	1	1	1	1	1
NM_153584	BC031353	cDNA sequence BC031353	1	1	1	1	1
NM_153599	Cdk8	cyclin-dependent kinase 8	1	1	1	1	1
NM_172153	Lcorl	ligand dependent nuclear receptor corepressor-like	1	1	1	1	1
NM_172298	Tshz3	teashirt zinc finger family member 3	1	1	1	1	1
NM_172516	Ripk5	receptor interacting protein kinase 5	1	1	1	1	1
NM_172653	Slc39a10	solute carrier family 39 (zinc transporter), member 10	1	1	1	1	1
NM_175187	Tmem161b	transmembrane protein 161B	1	1	1	1	1
NM_175201	Rnf38	ring finger protein 38	1	1	1	1	1
NM_178382	Flrt3	fibronectin leucine rich transmembrane protein 3	1	1	1	1	1
NM_178803	Aebp2	AE binding protein 2	1	1	1	1	1
NM_181322	Ctcf	CCCTC-binding factor	1	1	1	1	1
NM_198010	Ankrd17	ankyrin repeat domain 17	1	1	1	1	1
NM_198300	Cpeb3	cytoplasmic polyadenylation element binding protein 3	1	1	1	1	1
NM_198625	BC060632	cDNA sequence BC060632	1	1	1	1	1
NM_198671	Gse1	genetic suppressor element 1	1	1	1	1	1
NM_198703	Wnk1	WNK lysine deficient protein kinase 1	1	1	1	1	1
NM_001001806	Zfp36l2	zinc finger protein 36, C3H type-like 2	0	1	1	1	1
NM_001001985	Nat8l	N-acetyltransferase 8-like	1	1	0	1	1
NM_001003909	Ankib1	ankyrin repeat and IBR domain containing 1	1	0	1	1	1
NM_001004180	BC057022	cDNA sequence BC057022	1	0	1	1	1
NM_001004367	Cxxc4	CXXC finger 4	1	1	0	1	1
NM_001006664	Epb4.1l1	erythrocyte protein band 4.1-like 1	1	0	1	1	1
NM_001013367	Prkaa1	protein kinase, AMP-activated, alpha 1 catalytic subunit	1	1	0	1	1
NM_001013392	Rreb1	ras responsive element binding protein 1	1	1	0	1	1
NM_001013616	Trim6	tripartite motif-containing 6	1	1	0	1	1
NM_001024856	Ttbk2	tau tubulin kinase 2	1	1	0	1	1
NM_001024857	Ttbk2	tau tubulin kinase 2	1	1	0	1	1
NM_001025192	Cxadr	coxsackievirus and adenovirus receptor	1	0	1	1	1
NM_001025431	Btbd3	BTB (POZ) domain containing 3	0	1	1	1	1
NM_001025560	Sox6	SRY-box containing gene 6	1	0	1	1	1
NM_001025572	Ankrd12	ankyrin repeat domain 12	1	0	1	1	1
NM_001029982	Sec23ip	Sec23 interacting protein	1	1	0	1	1
NM_001033145	1190002N15Rik	RIKEN cDNA 1190002N15 gene	1	1	0	1	1
NM_001033194	Gtf3c3	general transcription factor IIIC, polypeptide 3	1	1	0	1	1
NM_001033300	Gmps	guanine monphosphate synthetase	1	0	1	1	1
NM_001033332	Tmtc3	transmembrane and tetratricopeptide repeat containing 3	1	1	0	1	1
NM_001033369	Acvr1c	activin A receptor, type IC	1	1	0	1	1
NM_001033446	Gm949	gene model 949, (NCBI)	1	1	0	1	1
NM_001034868	Mrgprx2	MAS-related GPR, member X2	1	1	0	1	1
NM_001037539	Prok2	prokineticin 2	1	0	1	1	1
NM_001038589	Usp14	ubiquitin specific peptidase 14	1	1	0	1	1
NM_001038642	Ets1	E26 avian leukemia oncogene 1, 5" domain	1	0	1	1	1
NM_001039050	Pkib	protein kinase inhibitor beta, cAMP dependent, testis specific	1	1	0	1	1
NM_001039052	Pkib	protein kinase inhibitor beta, cAMP dependent, testis specific	1	1	0	1	1
NM_001039180	Bicd2	bicaudal D homolog 2 (Drosophila)	0	1	1	1	1
NM_001039644	Edem3	ER degradation enhancer, mannosidase alpha-like 3	1	1	0	1	1
NM_001040400	Tet2	tet oncogene family member 2	1	1	0	1	1
NM_001042699	4831426I19Rik	RIKEN cDNA 4831426I19 gene	1	1	0	1	1
NM_001077712	Stag2	stromal antigen 2	1	1	0	1	1
NM_001080814	Fat3	FAT tumor suppressor homolog 3 (Drosophila)	1	1	0	1	1
NM_001080819	Arid1a	AT rich interactive domain 1A (Swi1 like)	1	1	0	1	1
NM_001081088	Lrp2	low density lipoprotein receptor-related protein 2	1	1	0	1	1
NM_001081103	Stim2	stromal interaction molecule 2	1	1	0	1	1
NM_001081113	Ipo8	importin 8	1	1	0	1	1
NM_001081150	Lonrf1	LON peptidase N-terminal domain and ring finger 1	1	1	0	1	1
NM_001081178	Gpr116	G protein-coupled receptor 116	1	1	0	1	1
NM_001081222	Esco1	establishment of cohesion 1 homolog 1 (S. cerevisiae)	1	1	0	1	1
NM_001081229	Tsc22d2	TSC22 domain family 2	1	1	0	1	1
NM_001081319	C030046E11Rik	RIKEN cDNA C030046E11 gene	1	1	0	1	1
NM_001081379	Ankrd11	ankyrin repeat domain 11	1	1	0	1	1
NM_007471	App	amyloid beta (A4) precursor protein	0	1	1	1	1
NM_007501	Neurod4	neurogenic differentiation 4	1	1	0	1	1
NM_007711	Clcn3	chloride channel 3	1	0	1	1	1
NM_007929	Emp2	epithelial membrane protein 2	1	1	1	1	0
NM_007962	Mpzl2	myelin protein zero-like 2	1	1	0	1	1
NM_008031	Fmr1	fragile X mental retardation syndrome 1 homolog	1	0	1	1	1
NM_008055	Fzd4	frizzled homolog 4 (Drosophila)	1	1	0	1	1
NM_008056	Fzd6	frizzled homolog 6 (Drosophila)	0	1	1	1	1
NM_008077	Gad1	glutamic acid decarboxylase 1	1	1	0	1	1
NM_008142	Gnb1	guanine nucleotide binding protein (G protein), beta 1	1	1	0	1	1
NM_008441	Kif1b	kinesin family member 1B	1	0	1	1	1
NM_008442	Kif2a	kinesin family member 2A	1	0	1	1	1
NM_008620	Gbp4	guanylate binding protein 4	1	1	0	1	1
NM_008702	Nlk	nemo like kinase	0	1	1	1	1
NM_008739	Nsd1	nuclear receptor-binding SET-domain protein 1	1	1	0	1	1
NM_008745	Ntrk2	neurotrophic tyrosine kinase, receptor, type 2	1	1	0	1	1
NM_008882	Plxna2	plexin A2	1	1	0	1	1
NM_009103	Rrm1	ribonucleotide reductase M1	1	0	1	1	1
NM_009163	Sgpl1	sphingosine phosphate lyase 1	1	0	1	1	1
NM_009194	Slc12a2	solute carrier family 12, member 2	0	1	1	1	1
NM_009234	Sox11	SRY-box containing gene 11	1	0	1	1	1
NM_009308	Syt4	synaptotagmin IV	1	1	0	1	1
NM_009344	Phlda1	pleckstrin homology-like domain, family A, member 1	1	1	1	1	0
NM_009370	Tgfbr1	transforming growth factor, beta receptor I	0	1	1	1	1
NM_009408	Top1	topoisomerase (DNA) I	1	0	1	1	1
NM_009538	Plagl1	pleiomorphic adenoma gene-like 1	1	1	0	1	1
NM_009594	Abl1	c-abl oncogene 1, receptor tyrosine kinase	1	1	0	1	1
NM_009697	Nr2f2	nuclear receptor subfamily 2, group F, member 2	1	0	1	1	1
NM_009721	Atp1b1	ATPase, Na+/K+ transporting, beta 1 polypeptide	1	0	1	1	1
NM_009738	Bche	butyrylcholinesterase	1	1	0	1	1
NM_009759	Bmx	BMX non-receptor tyrosine kinase	1	1	0	1	1
NM_009779	C3ar1	complement component 3a receptor 1	1	1	0	1	1
NM_009821	Runx1	runt related transcription factor 1	1	0	1	1	1
NM_009868	Cdh5	cadherin 5	1	0	1	1	1
NM_009881	Cdyl	chromodomain protein, Y chromosome-like	0	1	1	1	1
NM_010017	Dag1	dystroglycan 1	0	1	1	1	1
NM_010028	Ddx3x	DEAD/H (Asp-Glu-Ala-Asp/His) box polypeptide 3, X-linked	1	1	1	1	0
NM_010160	Cugbp2	CUG triplet repeat, RNA binding protein 2	1	0	1	1	1
NM_010314	Gngt1	guanine nucleotide binding protein (G protein), gamma transducing activity polypeptide 1	1	1	0	1	1
NM_010332	Ednra	endothelin receptor type A	1	1	0	1	1
NM_010431	Hif1a	hypoxia inducible factor 1, alpha subunit	1	1	0	1	1
NM_010448	Hnrnpab	heterogeneous nuclear ribonucleoprotein A/B	1	0	1	1	1
NM_010469	Hoxd4	homeo box D4	1	0	1	1	1
NM_010636	Klf12	Kruppel-like factor 12	1	1	0	1	1
NM_010721	Lmnb1	lamin B1	1	0	1	1	1
NM_010733	Lrrn3	leucine rich repeat protein 3, neuronal	1	0	1	1	1
NM_011077	Phex	phosphate regulating gene with homologies to endopeptidases on the X chromosome (hypophosphatemia, vitamin D resistant rickets)	1	1	0	1	1
NM_011243	Rarb	retinoic acid receptor, beta	1	0	1	1	1
NM_011273	Xpr1	xenotropic and polytropic retrovirus receptor 1	1	0	1	1	1
NM_011406	Slc8a1	solute carrier family 8 (sodium/calcium exchanger), member 1	1	1	0	1	1
NM_011428	Snap25	synaptosomal-associated protein 25	1	1	0	1	1
NM_011445	Sox6	SRY-box containing gene 6	1	0	1	1	1
NM_011448	Sox9	SRY-box containing gene 9	0	1	1	1	1
NM_011527	Tal1	T-cell acute lymphocytic leukemia 1	1	0	1	1	1
NM_011566	Tead3	TEA domain family member 3	1	0	1	1	1
NM_011578	Tgfbr3	transforming growth factor, beta receptor III	1	1	0	1	1
NM_011603	Tbpl1	TATA box binding protein-like 1	0	1	1	1	1
NM_011755	Zfp35	zinc finger protein 35	1	1	0	1	1
NM_011808	Ets1	E26 avian leukemia oncogene 1, 5" domain	1	0	1	1	1
NM_011903	Tlk2	tousled-like kinase 2 (Arabidopsis)	0	1	1	1	1
NM_011945	Map3k1	mitogen-activated protein kinase kinase kinase 1	1	1	0	1	1
NM_011994	Abcd2	ATP-binding cassette, sub-family D (ALD), member 2	1	1	0	1	1
NM_012024	Ppp2r5e	protein phosphatase 2, regulatory subunit B (B56), epsilon isoform	1	0	1	1	1
NM_013500	Hapln1	hyaluronan and proteoglycan link protein 1	1	0	1	1	1
NM_013510	Epb4.1l1	erythrocyte protein band 4.1-like 1	1	0	1	1	1
NM_013608	Naca	nascent polypeptide-associated complex alpha polypeptide	1	1	0	1	1
NM_013615	Odf2	outer dense fiber of sperm tails 2	1	0	1	1	1
NM_013642	Dusp1	dual specificity phosphatase 1	1	1	0	1	1
NM_013724	Nrk	Nik related kinase	0	1	1	1	1
NM_013790	Abcc5	ATP-binding cassette, sub-family C (CFTR/MRP), member 5	0	1	1	1	1
NM_013873	Sult4a1	sulfotransferase family 4A, member 1	1	1	0	1	1
NM_013886	Hdgfrp3	hepatoma-derived growth factor, related protein 3	1	0	1	1	1
NM_016758	Rgs14	regulator of G-protein signaling 14	1	1	0	1	1
NM_018770	Cadm1	cell adhesion molecule 1	1	0	1	1	1
NM_018824	Slc23a2	solute carrier family 23 (nucleobase transporters), member 2	1	0	1	1	1
NM_018864	Impa1	inositol (myo)-1(or 4)-monophosphatase 1	1	1	0	1	1
NM_019388	Cd86	CD86 antigen	1	1	0	1	1
NM_019465	Crtam	cytotoxic and regulatory T cell molecule	1	1	0	1	1
NM_019571	Tspan5	tetraspanin 5	1	0	1	1	1
NM_019641	Stmn1	stathmin 1	0	1	1	1	1
NM_019654	Socs5	suppressor of cytokine signaling 5	1	0	1	1	1
NM_019747	Zfp113	zinc finger protein 113	1	1	0	1	1
NM_019814	Higd1a	HIG1 domain family, member 1A	1	1	0	1	1
NM_019827	Gsk3b	glycogen synthase kinase 3 beta	1	0	1	1	1
NM_020007	Mbnl1	muscleblind-like 1 (Drosophila)	0	1	1	1	1
NM_020267	Trim44	tripartite motif-containing 44	1	0	1	1	1
NM_021356	Gab1	growth factor receptor bound protein 2-associated protein 1	1	0	1	1	1
NM_021420	Stk4	serine/threonine kinase 4	1	0	1	1	1
NM_021465	Stag2	stromal antigen 2	1	1	0	1	1
NM_021543	Pcdh8	protocadherin 8	1	0	1	1	1
NM_021563	Erbb2ip	Erbb2 interacting protein	0	1	1	1	1
NM_021876	Eed	embryonic ectoderm development	1	0	1	1	1
NM_023116	Cacnb2	calcium channel, voltage-dependent, beta 2 subunit	1	1	1	1	0
NM_023214	Slc30a7	solute carrier family 30 (zinc transporter), member 7	1	0	1	1	1
NM_023526	Nkiras1	NFKB inhibitor interacting Ras-like protein 1	1	0	1	1	1
NM_023626	Ing3	inhibitor of growth family, member 3	0	1	1	1	1
NM_023647	Nipa2	non imprinted in Prader-Willi/Angelman syndrome 2 homolog (human)	1	1	0	1	1
NM_024495	Car13	carbonic anhydrase 13	1	1	0	1	1
NM_025275	Amz2	archaelysin family metallopeptidase 2	1	1	0	1	1
NM_025356	Ube2d3	ubiquitin-conjugating enzyme E2D 3 (UBC4/5 homolog, yeast)	1	0	1	1	1
NM_025438	Rsrc2	arginine/serine-rich coiled-coil 2	1	1	0	1	1
NM_025555	2410004B18Rik	RIKEN cDNA 2410004B18 gene	0	1	1	1	1
NM_025690	Sltm	SAFB-like, transcription modulator	0	1	1	1	1
NM_025711	Aspn	asporin	0	1	1	1	1
NM_025777	Duoxa2	dual oxidase maturation factor 2	1	1	0	1	1
NM_025807	Slc16a9	solute carrier family 16 (monocarboxylic acid transporters), member 9	1	1	0	1	1
NM_025826	Acadsb	acyl-Coenzyme A dehydrogenase, short/branched chain	1	1	0	1	1
NM_025840	Bzw2	basic leucine zipper and W2 domains 2	1	0	1	1	1
NM_025887	Rab5a	RAB5A, member RAS oncogene family	1	0	1	1	1
NM_025926	Dnajb4	DnaJ (Hsp40) homolog, subfamily B, member 4	1	1	0	1	1
NM_026106	Dr1	down-regulator of transcription 1	0	1	1	1	1
NM_026155	Ssr3	signal sequence receptor, gamma	1	1	0	1	1
NM_026214	Kctd4	potassium channel tetramerisation domain containing 4	1	1	0	1	1
NM_026327	1810048J11Rik	RIKEN cDNA 1810048J11 gene	1	1	0	1	1
NM_026622	3110057O12Rik	RIKEN cDNA 3110057O12 gene	1	1	0	1	1
NM_026899	Ssu72	Ssu72 RNA polymerase II CTD phosphatase homolog (yeast)	1	1	0	1	1
NM_026963	Lzic	leucine zipper and CTNNBIP1 domain containing	1	1	0	1	1
NM_027032	Pacrg	Park2 co-regulated	1	1	0	1	1
NM_027286	Ace2	angiotensin I converting enzyme (peptidyl-dipeptidase A) 2	1	1	0	1	1
NM_027375	Gcc2	GRIP and coiled-coil domain containing 2	1	1	0	1	1
NM_027642	Phf6	PHD finger protein 6	0	1	1	1	1
NM_027652	D5Wsu178e	DNA segment, Chr 5, Wayne State University 178, expressed	1	0	1	1	1
NM_027667	Arhgap19	Rho GTPase activating protein 19	1	1	0	1	1
NM_027934	Rnf180	ring finger protein 180	1	1	0	1	1
NM_028052	Synpr	synaptoporin	1	1	0	1	1
NM_028058	Fundc1	FUN14 domain containing 1	1	1	0	1	1
NM_028089	Cyp2c55	cytochrome P450, family 2, subfamily c, polypeptide 55	1	1	0	1	1
NM_028339	Txndc1	thioredoxin domain containing 1	1	1	0	1	1
NM_028343	Tmem135	transmembrane protein 135	1	1	0	1	1
NM_028534	Smap1	stromal membrane-associated protein 1	1	1	0	1	1
NM_028712	Rap2b	RAP2B, member of RAS oncogene family	1	1	0	1	1
NM_028876	Tmed5	transmembrane emp24 protein transport domain containing 5	1	1	0	1	1
NM_028910	Olfr701	olfactory receptor 701	1	1	0	1	1
NM_028986	Gzf1	GDNF-inducible zinc finger protein 1	1	1	0	1	1
NM_029494	Rab30	RAB30, member RAS oncogene family	1	1	0	1	1
NM_029636	Ctsq	cathepsin Q	1	1	0	1	1
NM_030033	Crisp4	cysteine-rich secretory protein 4	1	1	0	1	1
NM_030147	Brd8	bromodomain containing 8	1	1	0	1	1
NM_030188	Ttc30a1	tetratricopeptide repeat domain 30A1	1	1	0	1	1
NM_030886	Ankrd17	ankyrin repeat domain 17	0	1	1	1	1
NM_031367	H28	histocompatibility 28	1	1	0	1	1
NM_031842	Smarcd1	SWI/SNF related, matrix associated, actin dependent regulator of chromatin, subfamily d, member 1	1	1	0	1	1
NM_033269	Chrm3	cholinergic receptor, muscarinic 3, cardiac	1	0	1	1	1
NM_080788	Ttbk2	tau tubulin kinase 2	1	1	0	1	1
NM_133683	Tmem19	transmembrane protein 19	1	1	0	1	1
NM_133687	Cxxc5	CXXC finger 5	1	0	1	1	1
NM_133758	Usp47	ubiquitin specific peptidase 47	1	0	1	1	1
NM_133828	Creb1	cAMP responsive element binding protein 1	1	0	1	1	1
NM_133940	Fbxl14	F-box and leucine-rich repeat protein 14	1	1	1	1	0
NM_134163	Mbnl3	muscleblind-like 3 (Drosophila)	1	1	0	1	1
NM_138587	D6Wsu176e	DNA segment, Chr 6, Wayne State University 176, expressed	1	1	0	1	1
NM_138605	Ppp1r3f	protein phosphatase 1, regulatory (inhibitor) subunit 3F	1	1	0	1	1
NM_138756	Slc25a36	solute carrier family 25, member 36	1	1	0	1	1
NM_139143	Slc39a6	solute carrier family 39 (metal ion transporter), member 6	1	1	0	1	1
NM_139144	Ogt	O-linked N-acetylglucosamine (GlcNAc) transferase (UDP-N-acetylglucosamine:polypeptide-N-acetylglucosaminyl transferase)	1	0	1	1	1
NM_144549	Trib1	tribbles homolog 1 (Drosophila)	1	0	1	1	1
NM_144913	Mepce	methylphosphate capping enzyme	1	0	1	1	1
NM_144920	Plekha5	pleckstrin homology domain containing, family A member 5	1	1	0	1	1
NM_145392	Bag2	Bcl2-associated athanogene 2	1	1	0	1	1
NM_145985	Arcn1	archain 1	1	1	0	1	1
NM_146234	Tmem32	transmembrane protein 32	1	1	0	1	1
NM_146258	Stard13	StAR-related lipid transfer (START) domain containing 13	1	1	0	1	1
NM_148926	Zfand3	zinc finger, AN1-type domain 3	1	0	1	1	1
NM_153743	Dnmt3a	DNA methyltransferase 3A	1	0	1	1	1
NM_172284	Ddx19b	DEAD (Asp-Glu-Ala-Asp) box polypeptide 19b	1	1	0	1	1
NM_172413	Rap2c	RAP2C, member of RAS oncogene family	1	1	1	1	0
NM_172555	Papolg	poly(A) polymerase gamma	1	0	1	1	1
NM_172775	Plxnb1	plexin B1	1	0	1	1	1
NM_172839	Ccnj	cyclin J	0	1	1	1	1
NM_172860	Cbfa2t2	core-binding factor, runt domain, alpha subunit 2, translocated to, 2 (human)	1	1	0	1	1
NM_173014	Lpcat2	lysophosphatidylcholine acyltransferase 2	1	1	0	1	1
NM_173408	Dcun1d3	DCN1, defective in cullin neddylation 1, domain containing 3 (S. cerevisiae)	1	0	1	1	1
NM_173780	Klf8	Kruppel-like factor 8	1	0	1	1	1
NM_173876	Clcn3	chloride channel 3	1	0	1	1	1
NM_175036	Leprot	leptin receptor overlapping transcript	1	1	0	1	1
NM_175095	Commd2	COMM domain containing 2	1	1	0	1	1
NM_175121	Slc38a2	solute carrier family 38, member 2	1	1	0	1	1
NM_175164	Arhgap26	Rho GTPase activating protein 26	1	0	1	1	1
NM_175212	Tmem65	transmembrane protein 65	1	1	0	1	1
NM_175217	Mmd2	monocyte to macrophage differentiation-associated 2	1	1	0	1	1
NM_175224	Metap1	methionyl aminopeptidase 1	1	1	0	1	1
NM_175403	2410014A08Rik	RIKEN cDNA 2410014A08 gene	1	0	1	1	1
NM_175539	Wdr40c	WD repeat domain 40C	1	1	0	1	1
NM_175549	Robo2	roundabout homolog 2 (Drosophila)	1	1	0	1	1
NM_176841	Ccdc88a	coiled coil domain containing 88A	1	0	1	1	1
NM_177619	Myst2	MYST histone acetyltransferase 2	1	0	1	1	1
NM_177721	Ranbp6	RAN binding protein 6	1	1	0	1	1
NM_177790	Zfp385c	zinc finger protein 385C	1	1	0	1	1
NM_177798	Frs2	fibroblast growth factor receptor substrate 2	1	0	1	1	1
NM_178710	Snf1lk2	SNF1-like kinase 2	1	0	1	1	1
NM_181412	Zbed4	zinc finger, BED domain containing 4	1	0	1	1	1
NM_183126	6030498E09Rik	RIKEN cDNA 6030498E09 gene	1	1	0	1	1
NM_194051	Rtn4	reticulon 4	1	1	0	1	1
NM_194053	Rtn4	reticulon 4	1	1	0	1	1
NM_194054	Rtn4	reticulon 4	1	1	0	1	1
NM_198108	BC023055	cDNA sequence BC023055	0	1	1	1	1
NM_198631	Zc3h4	zinc finger CCCH-type containing 4	1	1	0	1	1
NM_198649	Ablim3	actin binding LIM protein family, member 3	1	0	1	1	1
NM_199322	Dot1l	DOT1-like, histone H3 methyltransferase (S. cerevisiae)	1	1	0	1	1
NM_199467	F730047E07Rik	RIKEN cDNA F730047E07 gene	1	1	0	1	1
NM_207652	Tsc22d1	TSC22 domain family, member 1	1	0	1	1	1
NM_207675	Cadm1	cell adhesion molecule 1	1	0	1	1	1
NM_207676	Cadm1	cell adhesion molecule 1	1	0	1	1	1
NM_001001447	Zscan22	zinc finger and SCAN domain containing 22	1	0	0	1	1
NM_001001932	Eea1	early endosome antigen 1	1	0	0	1	1
NM_001001979	Megf10	multiple EGF-like-domains 10	1	0	0	1	1
NM_001001984	Fbxl11	F-box and leucine-rich repeat protein 11	1	0	0	1	1
NM_001001986	8430427H17Rik	RIKEN cDNA 8430427H17 gene	1	0	0	1	1
NM_001002005	Panx2	pannexin 2	1	0	0	1	1
NM_001003717	Osbpl8	oxysterol binding protein-like 8	1	0	0	1	1
NM_001003815	Epb4.1l1	erythrocyte protein band 4.1-like 1	0	0	1	1	1
NM_001003908	Cltc	clathrin, heavy polypeptide (Hc)	1	0	0	1	1
NM_001003912	Arhgef11	Rho guanine nucleotide exchange factor (GEF) 11	1	0	0	1	1
NM_001003946	Als2cr13	amyotrophic lateral sclerosis 2 (juvenile) chromosome region, candidate 13 (human)	1	0	0	1	1
NM_001003950	Rab3ip	RAB3A interacting protein	1	0	0	1	1
NM_001003971	Senp7	SUMO1/sentrin specific peptidase 7	1	0	0	1	1
NM_001004151	Rtp1	receptor transporter protein 1	1	0	0	1	1
NM_001004173	Sgpp2	sphingosine-1-phosphate phosphotase 2	1	0	0	1	1
NM_001004190	Zfp560	zinc finger protein 560	1	0	0	1	1
NM_001004362	2610008E11Rik	RIKEN cDNA 2610008E11 gene	1	0	0	1	1
NM_001004762	Pla2g4c	phospholipase A2, group IVC (cytosolic, calcium-independent)	1	0	0	1	1
NM_001005341	Ypel2	yippee-like 2 (Drosophila)	1	0	0	1	1
NM_001005420	Gm347	gene model 347, (NCBI)	1	0	0	1	1
NM_001005740	Phactr1	phosphatase and actin regulator 1	1	0	0	1	1
NM_001005858	LOC667370	similar to interferon-induced protein with tetratricopeptide repeats 3	1	0	0	1	1
NM_001007568	Zfp251	zinc finger protein 251	1	0	0	1	1
NM_001008232	Ddefl1	development and differentiation enhancing factor-like 1	1	0	0	1	1
NM_001008426	EG433365	predicted gene, EG433365	1	0	0	1	1
NM_001008533	Adora1	adenosine A1 receptor	1	0	0	1	1
NM_001009818	2014-09-11	septin 11	1	0	0	1	1
NM_001009949	Mcart1	mitochondrial carrier triple repeat 1	1	0	0	1	1
NM_001012310	AI132487	expressed sequence AI132487	1	0	0	1	1
NM_001012324	Ecm2	extracellular matrix protein 2, female organ and adipocyte specific	1	0	0	1	1
NM_001012477	Cxcl12	chemokine (C-X-C motif) ligand 12	0	0	1	1	1
NM_001013028	AI597468	expressed sequence AI597468	1	0	0	1	1
NM_001013379	D10627	cDNA sequence D10627	1	0	0	1	1
NM_001013386	Rasl10b	RAS-like, family 10, member B	1	0	0	1	1
NM_001013414	0610025P10Rik	RIKEN cDNA 0610025P10 gene	1	0	0	1	1
NM_001013607	Vmo1	vitelline membrane outer layer 1 homolog (chicken)	1	0	0	1	1
NM_001013788	EG432743	predicted gene, EG432743	1	0	0	1	1
NM_001013826	Dupd1	dual specificity phosphatase and pro isomerase domain containing 1	1	0	0	1	1
NM_001013833	Prkg1	protein kinase, cGMP-dependent, type I	1	0	0	1	1
NM_001014288	Ptprd	protein tyrosine phosphatase, receptor type, D	1	0	0	1	1
NM_001014973	Snx13	sorting nexin 13	1	0	0	1	1
NM_001017426	Jmjd3	jumonji domain containing 3	0	0	1	1	1
NM_001017983	Foxred2	FAD-dependent oxidoreductase domain containing 2	1	0	0	1	1
NM_001024205	Nufip2	nuclear fragile X mental retardation protein interacting protein 2	1	0	0	1	1
NM_001024474	Diras2	DIRAS family, GTP-binding RAS-like 2	1	0	0	1	1
NM_001024526	Larp4	La ribonucleoprotein domain family, member 4	1	0	0	1	1
NM_001024602	AW555464	expressed sequence AW555464	1	0	0	1	1
NM_001024622	Pcnp	PEST proteolytic signal containing nuclear protein	1	0	0	1	1
NM_001024703	Mctp2	multiple C2 domains, transmembrane 2	1	0	0	1	1
NM_001024931	D11Bwg0517e	DNA segment, Chr 11, Brigham & Women"s Genetics 0517 expressed	1	0	0	1	1
NM_001025102	2700007P21Rik	RIKEN cDNA 2700007P21 gene	1	0	0	1	1
NM_001025106	Tmem201	transmembrane protein 201	0	0	1	1	1
NM_001025261	Tpd52	tumor protein D52	1	0	0	1	1
NM_001025264	Tpd52	tumor protein D52	1	0	0	1	1
NM_001025309	Pja2	praja 2, RING-H2 motif containing	1	0	0	1	1
NM_001025428	Spag9	sperm associated antigen 9	1	0	0	1	1
NM_001025429	Spag9	sperm associated antigen 9	1	0	0	1	1
NM_001025430	Spag9	sperm associated antigen 9	1	0	0	1	1
NM_001025444	Aptx	aprataxin	1	0	0	1	1
NM_001025559	Sox6	SRY-box containing gene 6	1	0	0	1	1
NM_001025567	Dmbx1	diencephalon/mesencephalon homeobox 1	1	0	0	1	1
NM_001025581	Kcnc2	potassium voltage gated channel, Shaw-related subfamily, member 2	1	0	0	1	1
NM_001025600	Cadm1	cell adhesion molecule 1	0	0	1	1	1
NM_001025618	Cant1	calcium activated nucleotidase 1	1	0	0	1	1
NM_001029841	Sla	src-like adaptor	1	0	0	1	1
NM_001029843	Vrk1	vaccinia related kinase 1	1	0	0	1	1
NM_001029890	Mex3a	mex3 homolog A (C. elegans)	1	0	0	1	1
NM_001029912	Zswim5	zinc finger, SWIM domain containing 5	1	0	0	1	1
NM_001029936	Specc1	sperm antigen with calponin homology and coiled-coil domains 1	1	0	0	1	1
NM_001029983	Man1b1	mannosidase, alpha, class 1B, member 1	1	0	0	1	1
NM_001031814	2610207I05Rik	RIKEN cDNA 2610207I05 gene	1	0	0	1	1
NM_001033126	Cd27	CD27 antigen	1	0	0	1	1
NM_001033168	1700066B19Rik	RIKEN cDNA 1700066B19 gene	1	0	0	1	1
NM_001033198	Ankrd50	ankrin repeat domain 50	1	0	0	1	1
NM_001033223	Lin7a	lin-7 homolog A (C. elegans)	1	0	0	1	1
NM_001033258	D10Bwg1379e	DNA segment, Chr 10, Brigham & Women"s Genetics 1379 expressed	1	0	0	1	1
NM_001033273	5031439G07Rik	RIKEN cDNA 5031439G07 gene	1	0	0	1	1
NM_001033275	Glt8d3	glycosyltransferase 8 domain containing 3	1	0	0	1	1
NM_001033284	BC026585	cDNA sequence BC026585	1	0	0	1	1
NM_001033299	Zfp217	zinc finger protein 217	1	0	0	1	1
NM_001033304	5330417C22Rik	RIKEN cDNA 5330417C22 gene	1	0	0	1	1
NM_001033305	Ndufb6	NADH dehydrogenase (ubiquinone) 1 beta subcomplex, 6	1	0	0	1	1
NM_001033329	Arhgef9	Cdc42 guanine nucleotide exchange factor (GEF) 9	1	0	0	1	1
NM_001033331	Gas2l3	growth arrest-specific 2 like 3	1	0	0	1	1
NM_001033334	Tmem90a	transmembrane protein 90a	1	0	0	1	1
NM_001033340	Lrrc30	leucine rich repeat containing 30	1	0	0	1	1
NM_001033352	Klhl21	kelch-like 21 (Drosophila)	1	0	0	1	1
NM_001033360	Gpr101	G protein-coupled receptor 101	1	0	0	1	1
NM_001033364	Pcdh24	protocadherin 24	1	0	0	1	1
NM_001033380	E030018N11Rik	RIKEN cDNA E030018N11 gene	1	0	0	1	1
NM_001033389	Fubp3	far upstream element (FUSE) binding protein 3	0	0	1	1	1
NM_001033397	Krt26	keratin 26	1	0	0	1	1
NM_001033399	Gfod1	glucose-fructose oxidoreductase domain containing 1	1	0	0	1	1
NM_001033432	Heca	headcase homolog (Drosophila)	1	0	0	1	1
NM_001033439	Lrch1	leucine-rich repeats and calponin homology (CH) domain containing 1	1	0	0	1	1
NM_001033443	Cdkl4	cyclin-dependent kinase-like 4	1	0	0	1	1
NM_001033453	Ppm2c	protein phosphatase 2C, magnesium dependent, catalytic subunit	1	0	0	1	1
NM_001033463	Tatdn2	TatD DNase domain containing 2	1	0	0	1	1
NM_001033475	Tmed8	transmembrane emp24 domain containing 8	1	0	0	1	1
NM_001033535	Tnfaip8l3	tumor necrosis factor, alpha-induced protein 8-like 3	1	0	0	1	1
NM_001033634	Zyg11b	zyg-ll homolog B (C. elegans)	1	0	0	1	1
NM_001033713	Mef2a	myocyte enhancer factor 2A	0	0	1	1	1
NM_001033759	Tmem2	transmembrane protein 2	1	0	0	1	1
NM_001033877	Adamts17	a disintegrin-like and metallopeptidase (reprolysin type) with thrombospondin type 1 motif, 17	1	0	0	1	1
NM_001033978	H2-Eb2	histocompatibility 2, class II antigen E beta2	1	0	0	1	1
NM_001034858	Armc2	armadillo repeat containing 2	1	0	0	1	1
NM_001034863	Tmem136	transmembrane protein 136	1	0	0	1	1
NM_001035122	Golm1	golgi membrane protein 1	1	0	0	1	1
NM_001035510	Zcchc18	zinc finger, CCHC domain containing 18	1	0	0	1	1
NM_001035854	Ap2b1	adaptor-related protein complex 2, beta 1 subunit	1	0	0	1	1
NM_001036684	Atp2b2	ATPase, Ca++ transporting, plasma membrane 2	1	0	0	1	1
NM_001037099	Cacnb4	calcium channel, voltage-dependent, beta 4 subunit	1	0	0	1	1
NM_001037716	OTTMUSG00000019138	predicted gene, OTTMUSG00000019138	1	0	0	1	1
NM_001037725	Als2cr13	amyotrophic lateral sclerosis 2 (juvenile) chromosome region, candidate 13 (human)	1	0	0	1	1
NM_001037736	Arhgef10	Rho guanine nucleotide exchange factor (GEF) 10	1	0	0	1	1
NM_001037756	Brms1l	breast cancer metastasis-suppressor 1-like	1	0	0	1	1
NM_001037906	Nell1	NEL-like 1 (chicken)	1	0	0	1	1
NM_001037917	EG622976	predicted gene, EG622976	1	0	0	1	1
NM_001037926	OTTMUSG00000010173	predicted gene, OTTMUSG00000010173	1	0	0	1	1
NM_001037955	Dusp22	dual specificity phosphatase 22	1	0	0	1	1
NM_001038610	Dach1	dachshund 1 (Drosophila)	1	0	0	1	1
NM_001038613	Olfm1	olfactomedin 1	1	0	0	1	1
NM_001038619	Dnm3	dynamin 3	1	0	0	1	1
NM_001038621	Rabgap1l	RAB GTPase activating protein 1-like	1	0	0	1	1
NM_001038624	Ric3	resistance to inhibitors of cholinesterase 3 homolog (C. elegans)	1	0	0	1	1
NM_001038701	Gabrb3	gamma-aminobutyric acid (GABA-A) receptor, subunit beta 3	1	0	0	1	1
NM_001038990	Ids	iduronate 2-sulfatase	1	0	0	1	1
NM_001038991	Ids	iduronate 2-sulfatase	1	0	0	1	1
NM_001039039	Kctd21	potassium channel tetramerisation domain containing 21	1	0	0	1	1
NM_001039080	Rbms2	RNA binding motif, single stranded interacting protein 2	1	0	0	1	1
NM_001039086	Rapgef1	Rap guanine nucleotide exchange factor (GEF) 1	1	0	0	1	1
NM_001039087	Rapgef1	Rap guanine nucleotide exchange factor (GEF) 1	1	0	0	1	1
NM_001039088	Seh1l	SEH1-like (S. cerevisiae	1	0	0	1	1
NM_001039094	Negr1	neuronal growth regulator 1	0	0	1	1	1
NM_001039106	Ddhd1	DDHD domain containing 1	1	0	0	1	1
NM_001039126	Asb1	ankyrin repeat and SOCS box-containing protein 1	1	0	0	1	1
NM_001039146	B430211C08Rik	RIKEN cDNA B430211C08 gene	1	0	0	1	1
NM_001039150	Cd44	CD44 antigen	1	0	0	1	1
NM_001039151	Cd44	CD44 antigen	1	0	0	1	1
NM_001039167	D11Bwg0517e	DNA segment, Chr 11, Brigham & Women"s Genetics 0517 expressed	1	0	0	1	1
NM_001039168	D11Bwg0517e	DNA segment, Chr 11, Brigham & Women"s Genetics 0517 expressed	1	0	0	1	1
NM_001039181	Npr3	natriuretic peptide receptor 3	1	0	0	1	1
NM_001039201	Hdhd2	haloacid dehalogenase-like hydrolase domain containing 2	1	0	0	1	1
NM_001039214	Mex3c	mex3 homolog C (C. elegans)	1	0	0	1	1
NM_001039219	EG619597	predicted gene, EG619597	1	0	0	1	1
NM_001039347	Kcnd3	potassium voltage-gated channel, Shal-related family, member 3	1	0	0	1	1
NM_001039354	Lin7a	lin-7 homolog A (C. elegans)	1	0	0	1	1
NM_001039388	Wdr37	WD repeat domain 37	1	0	0	1	1
NM_001039389	Wdr37	WD repeat domain 37	1	0	0	1	1
NM_001039472	Kif21b	kinesin family member 21B	1	0	0	1	1
NM_001039510	Adora1	adenosine A1 receptor	1	0	0	1	1
NM_001039515	Arl4a	ADP-ribosylation factor-like 4A	1	0	0	1	1
NM_001039530	Parp14	poly (ADP-ribose) polymerase family, member 14	1	0	0	1	1
NM_001039546	Myo6	myosin VI	1	0	0	1	1
NM_001039551	Cnnm3	cyclin M3	1	0	0	1	1
NM_001039669	A930037G23Rik	RIKEN cDNA A930037G23 gene	1	0	0	1	1
NM_001040026	Sco1	SCO cytochrome oxidase deficient homolog 1 (yeast)	1	0	0	1	1
NM_001040106	Aak1	AP2 associated kinase 1	1	0	0	1	1
NM_001040399	Larp2	La ribonucleoprotein domain family, member 2	1	0	0	1	1
NM_001040682	Clmn	calmin	1	0	0	1	1
NM_001042485	Tmem183a	transmembrane protein 183A	1	0	0	1	1
NM_001042487	Dlgap4	discs, large homolog-associated protein 4 (Drosophila)	1	0	0	1	1
NM_001042488	Dlgap4	discs, large homolog-associated protein 4 (Drosophila)	1	0	0	1	1
NM_001042513	Txnrd1	thioredoxin reductase 1	1	0	0	1	1
NM_001042514	Txnrd1	thioredoxin reductase 1	1	0	0	1	1
NM_001042523	Txnrd1	thioredoxin reductase 1	1	0	0	1	1
NM_001042564	Cd27	CD27 antigen	1	0	0	1	1
NM_001042660	Smad7	MAD homolog 7 (Drosophila)	1	0	0	1	1
NM_001042719	Ddhd1	DDHD domain containing 1	1	0	0	1	1
NM_001042726	Pcdh8	protocadherin 8	1	0	0	1	1
NM_001043354	Rorb	RAR-related orphan receptor beta	1	0	0	1	1
NM_001043355	Mtap6	microtubule-associated protein 6	1	0	0	1	1
NM_001044308	Cacna1i	calcium channel, voltage-dependent, alpha 1I subunit	1	0	0	1	1
NM_001044700	Zfp2	zinc finger protein 2	1	0	0	1	1
NM_001044703	Zscan21	zinc finger and SCAN domain containing 21	1	0	0	1	1
NM_001044704	Zscan21	zinc finger and SCAN domain containing 21	1	0	0	1	1
NM_001044705	Zscan21	zinc finger and SCAN domain containing 21	1	0	0	1	1
NM_001045553	AI449175	expressed sequence AI449175	1	0	0	1	1
NM_001048060	5133401N09Rik	RIKEN cDNA 5133401N09 gene	1	0	0	1	1
NM_001048139	Bdnf	brain derived neurotrophic factor	1	0	0	1	1
NM_001048141	Bdnf	brain derived neurotrophic factor	1	0	0	1	1
NM_001048142	Bdnf	brain derived neurotrophic factor	1	0	0	1	1
NM_001048146	Azi2	5-azacytidine induced gene 2	1	0	0	1	1
NM_001048267	Tnpo1	transportin 1	1	0	0	1	1
NM_001076676	Usp33	ubiquitin specific peptidase 33	1	0	0	1	1
NM_001076681	1810012P15Rik	RIKEN cDNA 1810012P15 gene	1	0	0	1	1
NM_001076789	Cbx5	chromobox homolog 5 (Drosophila HP1a)	1	0	0	1	1
NM_001077265	Hnrnpd	heterogeneous nuclear ribonucleoprotein D	1	0	0	1	1
NM_001077266	Hnrnpd	heterogeneous nuclear ribonucleoprotein D	1	0	0	1	1
NM_001077267	Hnrnpd	heterogeneous nuclear ribonucleoprotein D	1	0	0	1	1
NM_001077403	Nrp2	neuropilin 2	1	0	0	1	1
NM_001077404	Nrp2	neuropilin 2	1	0	0	1	1
NM_001077405	Nrp2	neuropilin 2	1	0	0	1	1
NM_001077495	Pik3r1	phosphatidylinositol 3-kinase, regulatory subunit, polypeptide 1 (p85 alpha)	1	0	0	1	1
NM_001077687	Lrba	LPS-responsive beige-like anchor	1	0	0	1	1
NM_001077695	Ncoa2	nuclear receptor coactivator 2	1	0	0	1	1
NM_001077707	Shprh	SNF2 histone linker PHD RING helicase	1	0	0	1	1
NM_001079686	Syne1	synaptic nuclear envelope 1	1	0	0	1	1
NM_001079844	Gpc6	glypican 6	1	0	0	1	1
NM_001079849	Paip1	polyadenylate binding protein-interacting protein 1	1	0	0	1	1
NM_001079876	Gas2l3	growth arrest-specific 2 like 3	1	0	0	1	1
NM_001080549	Hdx	highly divergent homeobox	1	0	0	1	1
NM_001080780	Ret	ret proto-oncogene	1	0	0	1	1
NM_001080931	Med13	mediator complex subunit 13	1	0	0	1	1
NM_001080932	Foxk2	forkhead box K2	1	0	0	1	1
NM_001080934	Slc16a5	solute carrier family 16 (monocarboxylic acid transporters), member 5	1	0	0	1	1
NM_001080948	Larp4	La ribonucleoprotein domain family, member 4	1	0	0	1	1
NM_001081011	Srgap2	SLIT-ROBO Rho GTPase activating protein 2	1	0	0	1	1
NM_001081021	Zfp780b	zinc finger protein 780B	1	0	0	1	1
NM_001081049	Mll1	myeloid/lymphoid or mixed-lineage leukemia 1	1	0	0	1	1
NM_001081058	Cdc2l5	cell division cycle 2-like 5 (cholinesterase-related cell division controller)	1	0	0	1	1
NM_001081068	Zfp294	zinc finger protein 294	1	0	0	1	1
NM_001081071	Lycat	lysocardiolipin acyltransferase	1	0	0	1	1
NM_001081079	Ogfrl1	opioid growth factor receptor-like 1	1	0	0	1	1
NM_001081086	Ppig	peptidyl-prolyl isomerase G (cyclophilin G)	1	0	0	1	1
NM_001081098	Zfp362	zinc finger protein 362	1	0	0	1	1
NM_001081101	4933407H18Rik	RIKEN cDNA 4933407H18 gene	1	0	0	1	1
NM_001081119	Abhd13	abhydrolase domain containing 13	1	0	0	1	1
NM_001081149	Myst3	MYST histone acetyltransferase (monocytic leukemia) 3	1	0	0	1	1
NM_001081151	Gan	giant axonal neuropathy	1	0	0	1	1
NM_001081152	Npat	nuclear protein in the AT region	1	0	0	1	1
NM_001081160	Mdga1	MAM domain containing glycosylphosphatidylinositol anchor 1	1	0	0	1	1
NM_001081161	9630050M13Rik	RIKEN cDNA 9630050M13 gene	1	0	0	1	1
NM_001081176	Polr3g	polymerase (RNA) III (DNA directed) polypeptide G	1	0	0	1	1
NM_001081183	1110037F02Rik	RIKEN cDNA 1110037F02 gene	1	0	0	1	1
NM_001081204	B3galtl	beta 1,3-galactosyltransferase-like	1	0	0	1	1
NM_001081205	Npal1	NIPA-like domain containing 1	1	0	0	1	1
NM_001081210	Mrpl44	mitochondrial ribosomal protein L44	1	0	0	1	1
NM_001081216	Phip	pleckstrin homology domain interacting protein	1	0	0	1	1
NM_001081220	Gpr179	G protein-coupled receptor 179	1	0	0	1	1
NM_001081221	Ercc6	excision repair cross-complementing rodent repair deficiency, complementation group 6	1	0	0	1	1
NM_001081230	Mtap9	microtubule-associated protein 9	1	0	0	1	1
NM_001081235	Mn1	meningioma 1	1	0	0	1	1
NM_001081255	Lrch3	leucine-rich repeats and calponin homology (CH) domain containing 3	1	0	0	1	1
NM_001081258	Kif14	kinesin family member 14	1	0	0	1	1
NM_001081259	Flvcr1	feline leukemia virus subgroup C cellular receptor 1	1	0	0	1	1
NM_001081267	Rsf1	remodeling and spacing factor 1	1	0	0	1	1
NM_001081278	Tbc1d4	TBC1 domain family, member 4	1	0	0	1	1
NM_001081293	4930535B03Rik	RIKEN cDNA 4930535B03 gene	1	0	0	1	1
NM_001081302	Trio	triple functional domain (PTPRF interacting)	1	0	0	1	1
NM_001081304	Atf6	activating transcription factor 6	1	0	0	1	1
NM_001081310	2010003H20Rik	RIKEN cDNA 2010003H20 gene	1	0	0	1	1
NM_001081315	Brpf3	bromodomain and PHD finger containing, 3	1	0	0	1	1
NM_001081320	Cyb561d1	cytochrome b-561 domain containing 1	1	0	0	1	1
NM_001081343	3110043O21Rik	RIKEN cDNA 3110043O21 gene	1	0	0	1	1
NM_001081344	Stxbp5	syntaxin binding protein 5 (tomosyn)	1	0	0	1	1
NM_001081353	2210408I21Rik	RIKEN cDNA 2210408I21 gene	1	0	0	1	1
NM_001081356	2610030H06Rik	RIKEN cDNA 2610030H06 gene	1	0	0	1	1
NM_001081360	Camsap1l1	calmodulin regulated spectrin-associated protein 1-like 1	1	0	0	1	1
NM_001081363	Cenpf	centromere protein F	1	0	0	1	1
NM_001081392	Mdn1	midasin homolog (yeast)	1	0	0	1	1
NM_001081395	Amotl1	angiomotin-like 1	1	0	0	1	1
NM_001081409	Phf20l1	PHD finger protein 20-like 1	1	0	0	1	1
NM_001081420	BC026590	cDNA sequence BC026590	1	0	0	1	1
NM_001081426	Dip2c	DIP2 disco-interacting protein 2 homolog C (Drosophila)	1	0	0	1	1
NM_001081453	Nin	ninein	1	0	0	1	1
NM_001081499	Tbc1d8b	TBC1 domain family, member 8B	1	0	0	1	1
NM_001081567	Mapk10	mitogen-activated protein kinase 10	1	0	0	1	1
NM_001081959	Klc1	kinesin light chain 1	1	0	0	1	1
NM_001081977	Rnf144a	ring finger protein 144A	1	0	0	1	1
NM_001082548	Spint2	serine protease inhibitor, Kunitz type 2	1	0	0	1	1
NM_001082553	Rab27b	RAB27b, member RAS oncogene family	1	0	0	1	1
NM_001083114	Pphln1	periphilin 1	1	0	0	1	1
NM_001083312	Gbp6	guanylate binding protein 6	1	0	0	1	1
NM_001083322	Klrk1	killer cell lectin-like receptor subfamily K, member 1	1	0	0	1	1
NM_001083616	Cacna1d	calcium channel, voltage-dependent, L type, alpha 1D subunit	1	0	0	1	1
NM_001083810	2600010E01Rik	RIKEN cDNA 2600010E01 gene	1	0	0	1	1
NM_001083906	Nr3c2	nuclear receptor subfamily 3, group C, member 2	1	0	0	1	1
NM_001085373	Mcc	mutated in colorectal cancers	1	0	0	1	1
NM_001085376	Pappa2	pappalysin 2	1	0	0	1	1
NM_001085507	Zbtb34	zinc finger and BTB domain containing 34	1	0	0	1	1
NM_001098171	Pcdh10	protocadherin 10	1	0	0	1	1
NM_001098225	Adam22	a disintegrin and metallopeptidase domain 22	1	0	0	1	1
NM_001098226	Tead3	TEA domain family member 3	1	0	0	1	1
NM_001098231	Ppm2c	protein phosphatase 2C, magnesium dependent, catalytic subunit	1	0	0	1	1
NM_001098233	Purg	purine-rich element binding protein G	1	0	0	1	1
NM_001098476	Grsf1	G-rich RNA sequence binding factor 1	1	0	0	1	1
NM_001098723	Yy2	Yy2 transcription factor	1	0	0	1	1
NM_001098836	Atxn7l3	ataxin 7-like 3	1	0	0	1	1
NM_001099328	OTTMUSG00000017459	predicted gene, OTTMUSG00000017459	1	0	0	1	1
NM_001110849	2600010E01Rik	RIKEN cDNA 2600010E01 gene	1	0	0	1	1
NM_001111016	Nav2	neuron navigator 2	1	0	0	1	1
NM_007382	Acadm	acyl-Coenzyme A dehydrogenase, medium chain	1	0	0	1	1
NM_007433	Akp5	alkaline phosphatase 5	1	0	0	1	1
NM_007434	Akt2	thymoma viral proto-oncogene 2	1	0	0	1	1
NM_007460	Ap3d1	adaptor-related protein complex 3, delta 1 subunit	1	0	0	1	1
NM_007479	Arf4	ADP-ribosylation factor 4	1	0	0	1	1
NM_007487	Arl4a	ADP-ribosylation factor-like 4A	1	0	0	1	1
NM_007495	Astn1	astrotactin 1	1	0	0	1	1
NM_007508	Atp6v1a	ATPase, H+ transporting, lysosomal V1 subunit A	1	0	0	1	1
NM_007509	Atp6v1b2	ATPase, H+ transporting, lysosomal V1 subunit B2	1	0	0	1	1
NM_007513	Slc7a1	solute carrier family 7 (cationic amino acid transporter, y+ system), member 1	1	0	0	1	1
NM_007516	Hnrnpd	heterogeneous nuclear ribonucleoprotein D	1	0	0	1	1
NM_007540	Bdnf	brain derived neurotrophic factor	1	0	0	1	1
NM_007548	Prdm1	PR domain containing 1, with ZNF domain	1	0	0	1	1
NM_007552	Bmi1	Bmi1 polycomb ring finger oncogene	1	0	0	1	1
NM_007560	Bmpr1b	bone morphogenetic protein receptor, type 1B	0	0	1	1	1
NM_007568	Btc	betacellulin, epidermal growth factor family member	1	0	0	1	1
NM_007592	Car8	carbonic anhydrase 8	1	0	0	1	1
NM_007610	Casp2	caspase 2	1	0	0	1	1
NM_007619	Cbl	Casitas B-lineage lymphoma	1	0	0	1	1
NM_007623	Cbx2	chromobox homolog 2 (Drosophila Pc class)	1	0	0	1	1
NM_007626	Cbx5	chromobox homolog 5 (Drosophila HP1a)	1	0	0	1	1
NM_007635	Ccng2	cyclin G2	1	0	0	1	1
NM_007664	Cdh2	cadherin 2	1	0	0	1	1
NM_007678	Cebpa	CCAAT/enhancer binding protein (C/EBP), alpha	1	0	0	1	1
NM_007697	Chl1	cell adhesion molecule with homology to L1CAM	1	0	0	1	1
NM_007724	Cnga2	cyclic nucleotide gated channel alpha 2	1	0	0	1	1
NM_007728	Coch	coagulation factor C homolog (Limulus polyphemus)	1	0	0	1	1
NM_007729	Col11a1	collagen, type XI, alpha 1	1	0	0	1	1
NM_007733	Col19a1	collagen, type XIX, alpha 1	1	0	0	1	1
NM_007734	Col4a3	collagen, type IV, alpha 3	1	0	0	1	1
NM_007746	Map3k8	mitogen-activated protein kinase kinase kinase 8	1	0	0	1	1
NM_007755	Cpeb1	cytoplasmic polyadenylation element binding protein 1	0	0	1	1	1
NM_007757	Cpox	coproporphyrinogen oxidase	1	0	0	1	1
NM_007768	Crp	C-reactive protein, pentraxin-related	1	0	0	1	1
NM_007781	Csf2rb2	colony stimulating factor 2 receptor, beta 2, low-affinity (granulocyte-macrophage)	1	0	0	1	1
NM_007783	Csk	c-src tyrosine kinase	1	0	0	1	1
NM_007788	Csnk2a1	casein kinase 2, alpha 1 polypeptide	1	0	0	1	1
NM_007803	Cttn	cortactin	1	0	0	1	1
NM_007814	Cyp2b19	cytochrome P450, family 2, subfamily b, polypeptide 19	1	0	0	1	1
NM_007853	Degs1	degenerative spermatocyte homolog 1 (Drosophila)	1	0	0	1	1
NM_007868	Dmd	dystrophin, muscular dystrophy	0	0	1	1	1
NM_007870	Dnase1l3	deoxyribonuclease 1-like 3	1	0	0	1	1
NM_007896	Mapre1	microtubule-associated protein, RP/EB family, member 1	1	0	0	1	1
NM_007909	Efna2	ephrin A2	1	0	0	1	1
NM_007925	Eln	elastin	0	0	1	1	1
NM_007930	Enc1	ectodermal-neural cortex 1	1	0	0	1	1
NM_007935	Epc1	enhancer of polycomb homolog 1 (Drosophila)	1	0	0	1	1
NM_007939	Epha8	Eph receptor A8	1	0	0	1	1
NM_007950	Ereg	epiregulin	1	0	0	1	1
NM_007960	Etv1	ets variant gene 1	0	0	1	1	1
NM_007974	F2rl1	coagulation factor II (thrombin) receptor-like 1	1	0	0	1	1
NM_008010	Fgfr3	fibroblast growth factor receptor 3	1	0	0	1	1
NM_008017	Smc2	structural maintenance of chromosomes 2	1	0	0	1	1
NM_008028	Flot2	flotillin 2	1	0	0	1	1
NM_008037	Fosl2	fos-like antigen 2	1	0	0	1	1
NM_008053	Fxr1	fragile X mental retardation gene 1, autosomal homolog	1	0	0	1	1
NM_008068	Gabra6	gamma-aminobutyric acid (GABA-A) receptor, subunit alpha 6	1	0	0	1	1
NM_008070	Gabrb2	gamma-aminobutyric acid (GABA-A) receptor, subunit beta 2	1	0	0	1	1
NM_008078	Gad2	glutamic acid decarboxylase 2	1	0	0	1	1
NM_008091	Gata3	GATA binding protein 3	0	0	1	1	1
NM_008093	Gata5	GATA binding protein 5	1	0	0	1	1
NM_008098	Mtpn	myotrophin	1	0	0	1	1
NM_008101	Gcgr	glucagon receptor	1	0	0	1	1
NM_008110	Gdf9	growth differentiation factor 9	1	0	0	1	1
NM_008130	Gli3	GLI-Kruppel family member GLI3	1	0	0	1	1
NM_008139	Gnaq	guanine nucleotide binding protein, alpha q polypeptide	1	0	0	1	1
NM_008149	Gpam	glycerol-3-phosphate acyltransferase, mitochondrial	1	0	0	1	1
NM_008217	Has3	hyaluronan synthase 3	1	0	0	1	1
NM_008222	Hccs	holocytochrome c synthetase	1	0	0	1	1
NM_008227	Hcn3	hyperpolarization-activated, cyclic nucleotide-gated K+ 3	1	0	0	1	1
NM_008270	Hoxb9	homeo box B9	1	0	0	1	1
NM_008278	Hpgd	hydroxyprostaglandin dehydrogenase 15 (NAD)	1	0	0	1	1
NM_008306	Ndst1	N-deacetylase/N-sulfotransferase (heparan glucosaminyl) 1	1	0	0	1	1
NM_008312	Htr2c	5-hydroxytryptamine (serotonin) receptor 2C	1	0	0	1	1
NM_008316	Hus1	Hus1 homolog (S. pombe)	1	0	0	1	1
NM_008378	Impact	imprinted and ancient	1	0	0	1	1
NM_008379	Kpnb1	karyopherin (importin) beta 1	1	0	0	1	1
NM_008398	Itga7	integrin alpha 7	1	0	0	1	1
NM_008409	Itm2a	integral membrane protein 2A	1	0	0	1	1
NM_008416	Junb	Jun-B oncogene	1	0	0	1	1
NM_008421	Kcnc1	potassium voltage gated channel, Shaw-related subfamily, member 1	1	0	0	1	1
NM_008425	Kcnj2	potassium inwardly-rectifying channel, subfamily J, member 2	1	0	0	1	1
NM_008432	Kcnu1	potassium channel, subfamily U, member 1	1	0	0	1	1
NM_008467	Kpna4	karyopherin (importin) alpha 4	0	0	1	1	1
NM_008468	Kpna6	karyopherin (importin) alpha 6	1	0	0	1	1
NM_008484	Lamb3	laminin, beta 3	1	0	0	1	1
NM_008493	Lep	leptin	1	0	0	1	1
NM_008494	Lfng	LFNG O-fucosylpeptide 3-beta-N-acetylglucosaminyltransferase	1	0	0	1	1
NM_008502	Llgl1	lethal giant larvae homolog 1 (Drosophila)	1	0	0	1	1
NM_008515	Lrrfip1	leucine rich repeat (in FLII) interacting protein 1	1	0	0	1	1
NM_008520	Ltbp3	latent transforming growth factor beta binding protein 3	1	0	0	1	1
NM_008527	Klrb1c	killer cell lectin-like receptor subfamily B member 1C	1	0	0	1	1
NM_008541	Smad5	MAD homolog 5 (Drosophila)	1	0	0	1	1
NM_008566	Mcm5	minichromosome maintenance deficient 5, cell division cycle 46 (S. cerevisiae)	1	0	0	1	1
NM_008569	Anapc1	anaphase promoting complex subunit 1	1	0	0	1	1
NM_008591	Met	met proto-oncogene	1	0	0	1	1
NM_008602	Pias2	protein inhibitor of activated STAT 2	1	0	0	1	1
NM_008633	Mtap4	microtubule-associated protein 4	1	0	0	1	1
NM_008636	Mtf1	metal response element binding transcription factor 1	1	0	0	1	1
NM_008678	Ncoa2	nuclear receptor coactivator 2	1	0	0	1	1
NM_008695	Nid2	nidogen 2	0	0	1	1	1
NM_008696	Map4k4	mitogen-activated protein kinase kinase kinase kinase 4	1	0	0	1	1
NM_008697	Nin	ninein	1	0	0	1	1
NM_008710	Nnt	nicotinamide nucleotide transhydrogenase	1	0	0	1	1
NM_008714	Notch1	Notch gene homolog 1 (Drosophila)	1	0	0	1	1
NM_008728	Npr3	natriuretic peptide receptor 3	1	0	0	1	1
NM_008742	Ntf3	neurotrophin 3	1	0	0	1	1
NM_008756	Ocln	occludin	1	0	0	1	1
NM_008759	Sebox	SEBOX homeobox	1	0	0	1	1
NM_008764	Tnfrsf11b	tumor necrosis factor receptor superfamily, member 11b (osteoprotegerin)	1	0	0	1	1
NM_008772	P2ry1	purinergic receptor P2Y, G-protein coupled 1	1	0	0	1	1
NM_008773	P2ry2	purinergic receptor P2Y, G-protein coupled 2	1	0	0	1	1
NM_008775	Pafah1b2	platelet-activating factor acetylhydrolase, isoform 1b, alpha2 subunit	1	0	0	1	1
NM_008802	Pde7a	phosphodiesterase 7A	0	0	1	1	1
NM_008829	Pgr	progesterone receptor	1	0	0	1	1
NM_008861	Pkd2	polycystic kidney disease 2	1	0	0	1	1
NM_008866	Lypla1	lysophospholipase 1	1	0	0	1	1
NM_008891	Pnn	pinin	1	0	0	1	1
NM_008900	Pou3f3	POU domain, class 3, transcription factor 3	1	0	0	1	1
NM_008919	Ppyr1	pancreatic polypeptide receptor 1	1	1	0	0	1
NM_008960	Pten	phosphatase and tensin homolog	1	0	0	1	1
NM_008976	Ptpn14	protein tyrosine phosphatase, non-receptor type 14	1	0	0	1	1
NM_008982	Ptprj	protein tyrosine phosphatase, receptor type, J	1	0	0	1	1
NM_009007	Rac1	RAS-related C3 botulinum substrate 1	1	0	0	1	1
NM_009009	Rad21	RAD21 homolog (S. pombe)	1	0	0	1	1
NM_009011	Rad23b	RAD23b homolog (S. cerevisiae)	1	0	0	1	1
NM_009019	Rag1	recombination activating gene 1	1	0	0	1	1
NM_009020	Rag2	recombination activating gene 2	1	0	0	1	1
NM_009024	Rara	retinoic acid receptor, alpha	1	0	0	1	1
NM_009031	Rbbp7	retinoblastoma binding protein 7	0	0	1	1	1
NM_009062	Rgs4	regulator of G-protein signaling 4	1	0	0	1	1
NM_009068	Ripk1	receptor (TNFRSF)-interacting serine-threonine kinase 1	1	0	0	1	1
NM_009072	Rock2	Rho-associated coiled-coil containing protein kinase 2	1	0	0	1	1
NM_009119	Sap18	Sin3-associated polypeptide 18	1	0	0	1	1
NM_009127	Scd1	stearoyl-Coenzyme A desaturase 1	1	0	0	1	1
NM_009128	Scd2	stearoyl-Coenzyme A desaturase 2	1	0	0	1	1
NM_009157	Map2k4	mitogen-activated protein kinase kinase 4	1	0	0	1	1
NM_009158	Mapk10	mitogen-activated protein kinase 10	1	0	0	1	1
NM_009173	Siah1b	seven in absentia 1B	1	0	0	1	1
NM_009182	St8sia3	ST8 alpha-N-acetyl-neuraminide alpha-2,8-sialyltransferase 3	1	0	0	1	1
NM_009183	St8sia4	ST8 alpha-N-acetyl-neuraminide alpha-2,8-sialyltransferase 4	1	0	0	1	1
NM_009192	Sla	src-like adaptor	1	0	0	1	1
NM_009214	Sms	spermine synthase	1	0	0	1	1
NM_009239	Sp4	trans-acting transcription factor 4	0	0	1	1	1
NM_009256	Serpinb9	serine (or cysteine) peptidase inhibitor, clade B, member 9	1	0	0	1	1
NM_009257	Serpinb5	serine (or cysteine) peptidase inhibitor, clade B, member 5	1	0	0	1	1
NM_009260	Spnb2	spectrin beta 2	1	0	0	1	1
NM_009273	Srp14	signal recognition particle 14	1	0	0	1	1
NM_009280	Ss18	synovial sarcoma translocation, Chromosome 18	1	0	0	1	1
NM_009304	Syngr2	synaptogyrin 2	1	0	0	1	1
NM_009306	Syt1	synaptotagmin I	1	0	0	1	1
NM_009320	Slc6a6	solute carrier family 6 (neurotransmitter transporter, taurine), member 6	1	0	0	1	1
NM_009330	Hnf1b	HNF1 homeobox B	1	0	0	1	1
NM_009346	Tead1	TEA domain family member 1	1	0	0	1	1
NM_009353	Terf2	telomeric repeat binding factor 2	1	0	0	1	1
NM_009366	Tsc22d1	TSC22 domain family, member 1	0	0	1	1	1
NM_009367	Tgfb2	transforming growth factor, beta 2	1	0	0	1	1
NM_009386	Tjp1	tight junction protein 1	0	0	1	1	1
NM_009395	Tnfaip1	tumor necrosis factor, alpha-induced protein 1 (endothelial)	1	0	0	1	1
NM_009397	Tnfaip3	tumor necrosis factor, alpha-induced protein 3	1	0	0	1	1
NM_009412	Tpd52	tumor protein D52	1	0	0	1	1
NM_009425	Tnfsf10	tumor necrosis factor (ligand) superfamily, member 10	1	0	0	1	1
NM_009450	Tubb2a	tubulin, beta 2a	1	0	0	1	1
NM_009471	Umps	uridine monophosphate synthetase	1	0	0	1	1
NM_009472	Unc5c	unc-5 homolog C (C. elegans)	1	0	0	1	1
NM_009481	Usp9x	ubiquitin specific peptidase 9, X chromosome	1	0	0	1	1
NM_009484	Uty	ubiquitously transcribed tetratricopeptide repeat gene, Y chromosome	1	0	0	1	1
NM_009504	Vdr	vitamin D receptor	1	0	0	1	1
NM_009507	Vhl	von Hippel-Lindau syndrome	1	0	0	1	1
NM_009508	Slc32a1	solute carrier family 32 (GABA vesicular transporter), member 1	1	0	0	1	1
NM_009517	Zmat3	zinc finger matrin type 3	1	0	0	1	1
NM_009535	Yes1	Yamaguchi sarcoma viral (v-yes) oncogene homolog 1	1	0	0	1	1
NM_009536	Ywhae	tyrosine 3-monooxygenase/tryptophan 5-monooxygenase activation protein, epsilon polypeptide	1	0	0	1	1
NM_009537	Yy1	YY1 transcription factor	1	0	0	1	1
NM_009540	Zfa	zinc finger protein, autosomal	0	0	1	1	1
NM_009547	Zfp161	zinc finger protein 161	1	0	0	1	1
NM_009557	Zfp46	zinc finger protein 46	1	0	0	1	1
NM_009564	Zfp64	zinc finger protein 64	1	0	0	1	1
NM_009579	Slc30a1	solute carrier family 30 (zinc transporter), member 1	1	0	0	1	1
NM_009597	Accn2	amiloride-sensitive cation channel 2, neuronal	0	0	1	1	1
NM_009615	Adam17	a disintegrin and metallopeptidase domain 17	1	0	0	1	1
NM_009616	Adam19	a disintegrin and metallopeptidase domain 19 (meltrin beta)	1	0	0	1	1
NM_009633	Adra2b	adrenergic receptor, alpha 2b	1	0	0	1	1
NM_009670	Ank3	ankyrin 3, epithelial	1	0	0	1	1
NM_009675	Aoc3	amine oxidase, copper containing 3	1	0	0	1	1
NM_009680	Ap3b1	adaptor-related protein complex 3, beta 1 subunit	1	0	0	1	1
NM_009682	Ap3s2	adaptor-related protein complex 3, sigma 2 subunit	1	0	0	1	1
NM_009688	Xiap	X-linked inhibitor of apoptosis	1	0	0	1	1
NM_009691	Aplp2	amyloid beta (A4) precursor-like protein 2	0	0	1	1	1
NM_009707	Arhgap6	Rho GTPase activating protein 6	1	0	0	1	1
NM_009723	Atp2b2	ATPase, Ca++ transporting, plasma membrane 2	1	0	0	1	1
NM_009727	Atp8a1	ATPase, aminophospholipid transporter (APLT), class I, type 8A, member 1	1	0	0	1	1
NM_009730	Atrn	attractin	1	0	0	1	1
NM_009733	Axin1	axin 1	1	0	0	1	1
NM_009758	Bmpr1a	bone morphogenetic protein receptor, type 1A	1	0	0	1	1
NM_009766	Brs3	bombesin-like receptor 3	1	0	0	1	1
NM_009793	Camk4	calcium/calmodulin-dependent protein kinase IV	1	0	0	1	1
NM_009804	Cat	catalase	1	0	0	1	1
NM_009806	Cask	calcium/calmodulin-dependent serine protein kinase (MAGUK family)	1	0	0	1	1
NM_009837	Cct4	chaperonin subunit 4 (delta)	1	0	0	1	1
NM_009847	Cd2ap	CD2-associated protein	1	0	0	1	1
NM_009851	Cd44	CD44 antigen	1	0	0	1	1
NM_009861	Cdc42	cell division cycle 42 homolog (S. cerevisiae)	1	0	0	1	1
NM_009867	Cdh4	cadherin 4	1	0	0	1	1
NM_009886	Celsr1	cadherin, EGF LAG seven-pass G-type receptor 1 (flamingo homolog, Drosophila)	1	0	0	1	1
NM_009952	Creb1	cAMP responsive element binding protein 1	0	0	1	1	1
NM_009999	Cyp2b10	cytochrome P450, family 2, subfamily b, polypeptide 10	1	0	0	1	1
NM_010048	Dgcr2	DiGeorge syndrome critical region gene 2	0	0	1	1	1
NM_010049	Dhfr	dihydrofolate reductase	1	0	0	1	1
NM_010051	Dkk1	dickkopf homolog 1 (Xenopus laevis)	1	0	0	1	1
NM_010103	Edil3	EGF-like repeats and discoidin I-like domains 3	1	0	0	1	1
NM_010104	Edn1	endothelin 1	1	0	0	1	1
NM_010107	Efna1	ephrin A1	1	0	0	1	1
NM_010111	Efnb2	ephrin B2	1	0	0	1	1
NM_010125	Elf5	E74-like factor 5	0	0	1	1	1
NM_010127	Pou6f1	POU domain, class 6, transcription factor 1	1	0	0	1	1
NM_010134	En2	engrailed 2	1	0	0	1	1
NM_010163	Ext2	exostoses (multiple) 2	1	0	0	1	1
NM_010178	Fusip1	FUS interacting protein (serine-arginine rich) 1	0	0	1	1	1
NM_010200	Fgf13	fibroblast growth factor 13	1	0	0	1	1
NM_010213	Fhl3	four and a half LIM domains 3	1	0	0	1	1
NM_010225	Foxf2	forkhead box F2	1	0	0	1	1
NM_010233	Fn1	fibronectin 1	1	0	0	1	1
NM_010234	Fos	FBJ osteosarcoma oncogene	0	0	1	1	1
NM_010251	Gabra4	gamma-aminobutyric acid (GABA-A) receptor, subunit alpha 4	1	0	0	1	1
NM_010260	Gbp2	guanylate binding protein 2	1	0	0	1	1
NM_010267	Gdap1	ganglioside-induced differentiation-associated-protein 1	1	0	0	1	1
NM_010298	Glrb	glycine receptor, beta subunit	1	0	0	1	1
NM_010333	S1pr2	sphingosine-1-phosphate receptor 2	1	0	0	1	1
NM_010367	Magi1	membrane associated guanylate kinase, WW and PDZ domain containing 1	1	0	0	1	1
NM_010439	Hmgb1	high mobility group box 1	1	0	0	1	1
NM_010472	Hrb	HIV-1 Rev binding protein	1	0	0	1	1
NM_010477	Hspd1	heat shock protein 1 (chaperonin)	1	0	0	1	1
NM_010498	Ids	iduronate 2-sulfatase	1	0	0	1	1
NM_010518	Igfbp5	insulin-like growth factor binding protein 5	0	0	1	1	1
NM_010546	Ikbkb	inhibitor of kappaB kinase beta	1	0	0	1	1
NM_010571	Irs3	insulin receptor substrate 3	1	0	0	1	1
NM_010572	Irs4	insulin receptor substrate 4	1	0	0	1	1
NM_010587	Itsn1	intersectin 1 (SH3 domain protein 1A)	1	0	0	1	1
NM_010604	Kcnj16	potassium inwardly-rectifying channel, subfamily J, member 16	1	0	0	1	1
NM_010629	Kifap3	kinesin-associated protein 3	1	0	0	1	1
NM_010633	Uhmk1	U2AF homology motif (UHM) kinase 1	1	0	0	1	1
NM_010655	Kpna2	karyopherin (importin) alpha 2	1	0	0	1	1
NM_010709	Lgtn	ligatin	1	0	0	1	1
NM_010716	Lig3	ligase III, DNA, ATP-dependent	1	0	0	1	1
NM_010720	Lipg	lipase, endothelial	1	0	0	1	1
NM_010731	Zbtb7a	zinc finger and BTB domain containing 7a	0	0	1	1	1
NM_010740	Cd93	CD93 antigen	1	0	0	1	1
NM_010752	Mad1l1	mitotic arrest deficient 1-like 1	1	0	0	1	1
NM_010788	Mecp2	methyl CpG binding protein 2	1	0	0	1	1
NM_010794	Mgat1	mannoside acetylglucosaminyltransferase 1	1	0	0	1	1
NM_010825	Meis2	Meis homeobox 2	0	0	1	1	1
NM_010833	Msn	moesin	1	0	0	1	1
NM_010834	Mstn	myostatin	1	0	0	1	1
NM_010864	Myo5a	myosin Va	1	0	0	1	1
NM_010870	Naip5	NLR family, apoptosis inhibitory protein 5	1	0	0	1	1
NM_010880	Ncl	nucleolin	1	0	0	1	1
NM_010892	Nek2	NIMA (never in mitosis gene a)-related expressed kinase 2	1	0	0	1	1
NM_010900	Nfatc2ip	nuclear factor of activated T-cells, cytoplasmic, calcineurin-dependent 2 interacting protein	1	0	0	1	1
NM_010902	Nfe2l2	nuclear factor, erythroid derived 2, like 2	0	0	1	1	1
NM_010921	Nkx3-1	NK-3 transcription factor, locus 1 (Drosophila)	1	0	0	1	1
NM_010926	Cox4nb	COX4 neighbor	1	0	0	1	1
NM_010928	Notch2	Notch gene homolog 2 (Drosophila)	1	0	0	1	1
NM_010934	Npy1r	neuropeptide Y receptor Y1	1	0	0	1	1
NM_010939	Nrp2	neuropilin 2	1	0	0	1	1
NM_011014	Oprs1	opioid receptor, sigma 1	1	0	0	1	1
NM_011022	Ott	ovary testis transcribed	1	1	0	0	1
NM_011062	Pdpk1	3-phosphoinositide dependent protein kinase-1	1	0	0	1	1
NM_011086	Pip5k3	phosphatidylinositol-3-phosphate/phosphatidylinositol 5-kinase, type III	1	0	0	1	1
NM_011112	Papola	poly (A) polymerase alpha	1	0	0	1	1
NM_011158	Prkar2b	protein kinase, cAMP dependent regulatory, type II beta	1	0	0	1	1
NM_011192	Psme3	proteaseome (prosome, macropain) 28 subunit, 3	1	0	0	1	1
NM_011201	Ptpn1	protein tyrosine phosphatase, non-receptor type 1	1	0	0	1	1
NM_011210	Ptprc	protein tyrosine phosphatase, receptor type, C	1	0	0	1	1
NM_011235	Rad51l3	RAD51-like 3 (S. cerevisiae)	1	0	0	1	1
NM_011246	Rasgrp1	RAS guanyl releasing protein 1	1	0	0	1	1
NM_011252	Rbmx	RNA binding motif protein, X chromosome	1	0	0	1	1
NM_011256	Pitpnm2	phosphatidylinositol transfer protein, membrane-associated 2	1	0	0	1	1
NM_011305	Rxra	retinoid X receptor alpha	1	0	0	1	1
NM_011306	Rxrb	retinoid X receptor beta	1	0	0	1	1
NM_011345	Sele	selectin, endothelial cell	1	0	0	1	1
NM_011354	Serf2	small EDRK-rich factor 2	1	0	0	1	1
NM_011361	Sgk1	serum/glucocorticoid regulated kinase 1	1	0	0	1	1
NM_011376	Sim1	single-minded homolog 1 (Drosophila)	1	0	0	1	1
NM_011378	Sin3a	transcriptional regulator, SIN3A (yeast)	1	0	0	1	1
NM_011382	Six4	sine oculis-related homeobox 4 homolog (Drosophila)	1	0	0	1	1
NM_011388	Slc10a2	solute carrier family 10, member 2	1	0	0	1	1
NM_011416	Smarca2	SWI/SNF related, matrix associated, actin dependent regulator of chromatin, subfamily a, member 2	0	0	1	1	1
NM_011417	Smarca4	SWI/SNF related, matrix associated, actin dependent regulator of chromatin, subfamily a, member 4	0	0	1	1	1
NM_011421	Smpd1	sphingomyelin phosphodiesterase 1, acid lysosomal	1	0	0	1	1
NM_011462	Spin1	spindlin 1	1	0	0	1	1
NM_011464	Spint2	serine protease inhibitor, Kunitz type 2	1	0	0	1	1
NM_011491	Stc2	stanniocalcin 2	1	0	0	1	1
NM_011506	Sucla2	succinate-Coenzyme A ligase, ADP-forming, beta subunit	1	0	0	1	1
NM_011520	Sdc3	syndecan 3	1	0	0	1	1
NM_011585	Tia1	cytotoxic granule-associated RNA binding protein 1	1	0	0	1	1
NM_011595	Timp3	tissue inhibitor of metalloproteinase 3	0	0	1	1	1
NM_011610	Tnfrsf1b	tumor necrosis factor receptor superfamily, member 1b	1	0	0	1	1
NM_011650	Tsn	translin	1	0	0	1	1
NM_011673	Ugcg	UDP-glucose ceramide glucosyltransferase	1	0	0	1	1
NM_011693	Vcam1	vascular cell adhesion molecule 1	1	0	0	1	1
NM_011699	Lin7c	lin-7 homolog C (C. elegans)	1	0	0	1	1
NM_011711	Fmnl3	formin-like 3	1	0	0	1	1
NM_011732	Ybx1	Y box protein 1	1	0	0	1	1
NM_011743	Zfp106	zinc finger protein 106	1	0	0	1	1
NM_011748	Zfp14	zinc finger protein 14	1	0	0	1	1
NM_011749	Zfp148	zinc finger protein 148	1	0	0	1	1
NM_011751	Zfp207	zinc finger protein 207	0	0	1	1	1
NM_011754	Zfp27	zinc finger protein 27	1	0	0	1	1
NM_011759	Zfp41	zinc finger protein 41	1	0	0	1	1
NM_011768	Zfx	zinc finger protein X-linked	0	0	1	1	1
NM_011774	Slc30a4	solute carrier family 30 (zinc transporter), member 4	1	0	0	1	1
NM_011780	Adam23	a disintegrin and metallopeptidase domain 23	1	0	0	1	1
NM_011782	Adamts5	a disintegrin-like and metallopeptidase (reprolysin type) with thrombospondin type 1 motif, 5 (aggrecanase-2)	1	0	0	1	1
NM_011785	Akt3	thymoma viral proto-oncogene 3	1	0	0	1	1
NM_011798	Xcr1	chemokine (C motif) receptor 1	1	0	0	1	1
NM_011800	Cdh20	cadherin 20	0	0	1	1	1
NM_011803	Klf6	Kruppel-like factor 6	1	0	1	1	0
NM_011805	Dido1	death inducer-obliterator 1	1	0	0	1	1
NM_011807	Dlg2	discs, large homolog 2 (Drosophila)	1	0	0	1	1
NM_011841	Mapk7	mitogen-activated protein kinase 7	1	0	0	1	1
NM_011857	Odz3	odd Oz/ten-m homolog 3 (Drosophila)	0	0	1	1	1
NM_011885	Mrps12	mitochondrial ribosomal protein S12	1	0	0	1	1
NM_011936	Fto	fat mass and obesity associated	1	0	0	1	1
NM_011941	Mapkbp1	mitogen-activated protein kinase binding protein 1	1	0	0	1	1
NM_011948	Map3k4	mitogen-activated protein kinase kinase kinase 4	0	0	1	1	1
NM_011949	Mapk1	mitogen-activated protein kinase 1	1	0	0	1	1
NM_011959	Orc5l	origin recognition complex, subunit 5-like (S. cerevisiae)	1	0	0	1	1
NM_011993	Dpysl4	dihydropyrimidinase-like 4	1	0	0	1	1
NM_011995	Pclo	piccolo (presynaptic cytomatrix protein)	1	0	0	1	1
NM_012000	Cln8	ceroid-lipofuscinosis, neuronal 8	1	0	0	1	1
NM_012010	Eif2s3x	eukaryotic translation initiation factor 2, subunit 3, structural gene X-linked	1	0	0	1	1
NM_012017	Zfp346	zinc finger protein 346	1	0	0	1	1
NM_012026	Rgnef	Rho-guanine nucleotide exchange factor	1	0	0	1	1
NM_012048	Polk	polymerase (DNA directed), kappa	1	0	0	1	1
NM_013415	Atp1b2	ATPase, Na+/K+ transporting, beta 2 polypeptide	0	0	1	1	1
NM_013454	Abca1	ATP-binding cassette, sub-family A (ABC1), member 1	0	0	1	1	1
NM_013460	Adra1d	adrenergic receptor, alpha 1d	1	0	0	1	1
NM_013470	Anxa3	annexin A3	1	0	0	1	1
NM_013498	Crem	cAMP responsive element modulator	1	0	0	1	1
NM_013506	Eif4a2	eukaryotic translation initiation factor 4A2	1	0	0	1	1
NM_013507	Eif4g2	eukaryotic translation initiation factor 4, gamma 2	0	0	1	1	1
NM_013531	Gnb4	guanine nucleotide binding protein (G protein), beta 4	1	0	0	1	1
NM_013555	Hoxd9	homeo box D9	1	0	0	1	1
NM_013629	Phtf1	putative homeodomain transcription factor 1	1	0	0	1	1
NM_013655	Cxcl12	chemokine (C-X-C motif) ligand 12	0	0	1	1	1
NM_013669	Snap91	synaptosomal-associated protein 91	1	0	0	1	1
NM_013672	Sp1	trans-acting transcription factor 1	1	0	0	1	1
NM_013696	Trhr	thyrotropin releasing hormone receptor	1	0	0	1	1
NM_013699	Ubp1	upstream binding protein 1	1	0	0	1	1
NM_013737	Pla2g7	phospholipase A2, group VII (platelet-activating factor acetylhydrolase, plasma)	1	0	0	1	1
NM_013738	Plek2	pleckstrin 2	1	0	0	1	1
NM_013771	Yme1l1	YME1-like 1 (S. cerevisiae)	1	0	0	1	1
NM_013785	Ihpk1	inositol hexaphosphate kinase 1	1	0	0	1	1
NM_013869	Tnfrsf19	tumor necrosis factor receptor superfamily, member 19	1	0	0	1	1
NM_013885	Clic4	chloride intracellular channel 4 (mitochondrial)	1	0	0	1	1
NM_013900	Mfi2	antigen p97 (melanoma associated) identified by monoclonal antibodies 133.2 and 96.5	1	0	0	1	1
NM_013905	Heyl	hairy/enhancer-of-split related with YRPW motif-like	1	0	0	1	1
NM_013910	Fbxl10	F-box and leucine-rich repeat protein 10	1	0	0	1	1
NM_013915	Zfp238	zinc finger protein 238	0	0	1	1	1
NM_013920	Hnf4g	hepatocyte nuclear factor 4, gamma	1	0	0	1	1
NM_013922	Zfp354c	zinc finger protein 354C	1	0	0	1	1
NM_013923	Rnf19a	ring finger protein 19A	1	0	0	1	1
NM_015733	Casp9	caspase 9	1	0	0	1	1
NM_015753	Zeb2	zinc finger E-box binding homeobox 2	0	0	1	1	1
NM_015755	Hunk	hormonally upregulated Neu-associated kinase	1	0	0	1	1
NM_015762	Txnrd1	thioredoxin reductase 1	1	0	0	1	1
NM_015768	Prok2	prokineticin 2	0	0	1	1	1
NM_015769	Ercc4	excision repair cross-complementing rodent repair deficiency, complementation group 4	1	0	0	1	1
NM_015802	Dlc1	deleted in liver cancer 1	1	0	0	1	1
NM_015806	Mapk6	mitogen-activated protein kinase 6	0	0	1	1	1
NM_015811	Rgs1	regulator of G-protein signaling 1	1	0	0	1	1
NM_016684	Zscan12	zinc finger and SCAN domain containing 12	1	0	0	1	1
NM_016686	Vezf1	vascular endothelial zinc finger 1	1	0	0	1	1
NM_016714	Nup50	nucleoporin 50	1	0	0	1	1
NM_016736	Nub1	negative regulator of ubiquitin-like proteins 1	1	0	0	1	1
NM_016739	Caprin1	cell cycle associated protein 1	1	0	0	1	1
NM_016762	Matn2	matrilin 2	1	0	0	1	1
NM_016768	Pbx3	pre B-cell leukemia transcription factor 3	0	0	1	1	1
NM_016775	Dnajc5	DnaJ (Hsp40) homolog, subfamily C, member 5	1	0	0	1	1
NM_016777	Nasp	nuclear autoantigenic sperm protein (histone-binding)	1	0	0	1	1
NM_016783	Pgrmc1	progesterone receptor membrane component 1	1	0	0	1	1
NM_016786	Ube2k	ubiquitin-conjugating enzyme E2K (UBC1 homolog, yeast)	1	0	0	1	1
NM_016787	Bnip2	BCL2/adenovirus E1B interacting protein 1, NIP2	1	0	0	1	1
NM_016792	Txnl1	thioredoxin-like 1	1	0	0	1	1
NM_016797	Stx7	syntaxin 7	1	0	0	1	1
NM_016802	Rhoa	ras homolog gene family, member A	0	0	1	1	1
NM_016804	Mtx2	metaxin 2	1	0	0	1	1
NM_016865	Htatip2	HIV-1 tat interactive protein 2, homolog (human)	1	0	0	1	1
NM_016881	Pmm2	phosphomannomutase 2	1	0	0	1	1
NM_016898	Cd164	CD164 antigen	1	0	0	1	1
NM_016912	Cdkl2	cyclin-dependent kinase-like 2 (CDC2-related kinase)	1	0	0	1	1
NM_016928	Tlr5	toll-like receptor 5	1	0	0	1	1
NM_016985	Mtmr1	myotubularin related protein 1	1	0	0	1	1
NM_017376	Tef	thyrotroph embryonic factor	1	0	0	1	1
NM_017462	Polg	polymerase (DNA directed), gamma	1	0	0	1	1
NM_017479	Myst4	MYST histone acetyltransferase monocytic leukemia 4	0	0	1	1	1
NM_018729	Cd244	CD244 natural killer cell receptor 2B4	1	0	0	1	1
NM_018733	Scn1a	sodium channel, voltage-gated, type I, alpha	1	0	0	1	1
NM_018736	Mre11a	meiotic recombination 11 homolog A (S. cerevisiae)	1	0	0	1	1
NM_018748	Golga4	golgi autoantigen, golgin subfamily a, 4	0	0	1	1	1
NM_018760	Slc4a4	solute carrier family 4 (anion exchanger), member 4	1	0	0	1	1
NM_018761	Ctnnal1	catenin (cadherin associated protein), alpha-like 1	1	0	0	1	1
NM_018764	Pcdh7	protocadherin 7	1	0	0	1	1
NM_018788	Extl3	exostoses (multiple)-like 3	1	0	0	1	1
NM_018798	Ubqln2	ubiquilin 2	1	0	0	1	1
NM_018804	Syt11	synaptotagmin XI	1	0	0	1	1
NM_018805	Hs3st3b1	heparan sulfate (glucosamine) 3-O-sulfotransferase 3B1	1	0	0	1	1
NM_018862	Agpat1	1-acylglycerol-3-phosphate O-acyltransferase 1 (lysophosphatidic acid acyltransferase, alpha)	1	0	0	1	1
NM_018871	Ywhag	tyrosine 3-monooxygenase/tryptophan 5-monooxygenase activation protein, gamma polypeptide	1	0	0	1	1
NM_018882	Gpr56	G protein-coupled receptor 56	1	0	0	1	1
NM_019440	Iigp2	interferon inducible GTPase 2	1	0	0	1	1
NM_019479	Hes6	hairy and enhancer of split 6 (Drosophila)	1	0	0	1	1
NM_019494	Cxcl11	chemokine (C-X-C motif) ligand 11	1	1	0	1	0
NM_019498	Olfm1	olfactomedin 1	1	0	0	1	1
NM_019501	Pdss1	prenyl (solanesyl) diphosphate synthase, subunit 1	1	0	0	1	1
NM_019505	Dgke	diacylglycerol kinase, epsilon	1	0	0	1	1
NM_019506	Gdf2	growth differentiation factor 2	1	0	0	1	1
NM_019552	Abcb10	ATP-binding cassette, sub-family B (MDR/TAP), member 10	1	0	0	1	1
NM_019586	Ube2j1	ubiquitin-conjugating enzyme E2, J1	1	0	0	1	1
NM_019632	Napb	N-ethylmaleimide sensitive fusion protein attachment protein beta	1	0	0	1	1
NM_019651	Ptpn9	protein tyrosine phosphatase, non-receptor type 9	0	0	1	1	1
NM_019653	Wsb1	WD repeat and SOCS box-containing 1	0	0	1	1	1
NM_019658	Shoc2	soc-2 (suppressor of clear) homolog (C. elegans)	1	0	0	1	1
NM_019681	Freq	frequenin homolog (Drosophila)	1	0	0	1	1
NM_019694	Letm1	leucine zipper-EF-hand containing transmembrane protein 1	1	0	0	1	1
NM_019711	Rbms2	RNA binding motif, single stranded interacting protein 2	1	0	0	1	1
NM_019712	Rbx1	ring-box 1	1	0	0	1	1
NM_019743	Rybp	RING1 and YY1 binding protein	1	0	0	1	1
NM_019748	Sae1	SUMO1 activating enzyme subunit 1	1	0	0	1	1
NM_019766	Ptges3	prostaglandin E synthase 3 (cytosolic)	1	0	0	1	1
NM_019790	Tmeff2	transmembrane protein with EGF-like and two follistatin-like domains 2	1	0	0	1	1
NM_019825	Ncoa6	nuclear receptor coactivator 6	1	0	0	1	1
NM_019840	Pde4b	phosphodiesterase 4B, cAMP specific	1	0	0	1	1
NM_019868	Hnrnph2	heterogeneous nuclear ribonucleoprotein H2	0	0	1	1	1
NM_019921	Akap10	A kinase (PRKA) anchor protein 10	1	0	0	1	1
NM_019961	Pex3	peroxisomal biogenesis factor 3	1	0	0	1	1
NM_019983	Rabgef1	RAB guanine nucleotide exchange factor (GEF) 1	1	0	0	1	1
NM_019988	Gbl	G protein beta subunit-like	1	0	0	1	1
NM_019996	Rnuxa	RNA U, small nuclear RNA export adaptor	1	0	0	1	1
NM_020049	Slc6a14	solute carrier family 6 (neurotransmitter transporter), member 14	1	0	0	1	1
NM_020295	Lmbr1	limb region 1	1	0	0	1	1
NM_020493	Srf	serum response factor	0	0	1	1	1
NM_020508	Brd4	bromodomain containing 4	1	0	0	1	1
NM_020575	2014-03-07	membrane-associated ring finger (C3HC4) 7	0	0	1	1	1
NM_020579	B4galt3	UDP-Gal:betaGlcNAc beta 1,4-galactosyltransferase, polypeptide 3	1	0	0	1	1
NM_020606	Parva	parvin, alpha	1	0	0	1	1
NM_020616	D930014E17Rik	RIKEN cDNA D930014E17 gene	1	0	0	1	1
NM_021028	Tk2	thymidine kinase 2, mitochondrial	1	0	0	1	1
NM_021274	Cxcl10	chemokine (C-X-C motif) ligand 10	1	1	0	1	0
NM_021299	Ak3	adenylate kinase 3	1	0	0	1	1
NM_021330	Acp1	acid phosphatase 1, soluble	1	0	0	1	1
NM_021334	Itgax	integrin alpha X	1	0	0	1	1
NM_021345	Ptplad1	protein tyrosine phosphatase-like A domain containing 1	1	0	0	1	1
NM_021392	Ap4m1	adaptor-related protein complex AP-4, mu 1	1	0	0	1	1
NM_021406	Trem1	triggering receptor expressed on myeloid cells 1	1	0	0	1	1
NM_021422	Dnaja4	DnaJ (Hsp40) homolog, subfamily A, member 4	1	0	0	1	1
NM_021431	Nudt11	nudix (nucleoside diphosphate linked moiety X)-type motif 11	0	0	1	1	1
NM_021439	Chst11	carbohydrate sulfotransferase 11	1	0	0	1	1
NM_021460	Lipa	lysosomal acid lipase A	1	0	0	1	1
NM_021463	Prps1	phosphoribosyl pyrophosphate synthetase 1	1	0	0	1	1
NM_021464	Ptprt	protein tyrosine phosphatase, receptor type, T	1	0	0	1	1
NM_021491	Smpd3	sphingomyelin phosphodiesterase 3, neutral	1	0	0	1	1
NM_021510	Hnrnph1	heterogeneous nuclear ribonucleoprotein H1	1	0	0	1	1
NM_021534	Pxmp4	peroxisomal membrane protein 4	1	0	0	1	1
NM_021537	Stk25	serine/threonine kinase 25 (yeast)	1	0	0	1	1
NM_021559	Zfp191	zinc finger protein 191	1	0	0	1	1
NM_021600	Chrnd	cholinergic receptor, nicotinic, delta polypeptide	1	0	0	1	1
NM_021704	Cxcl12	chemokine (C-X-C motif) ligand 12	1	0	0	1	1
NM_021887	Il21r	interleukin 21 receptor	1	0	0	1	1
NM_021890	Fads3	fatty acid desaturase 3	1	0	0	1	1
NM_021897	Trp53inp1	transformation related protein 53 inducible nuclear protein 1	0	0	1	1	1
NM_022317	Slc28a3	solute carrier family 28 (sodium-coupled nucleoside transporter), member 3	1	0	0	1	1
NM_022656	Nisch	nischarin	1	0	0	1	1
NM_022723	Scube1	signal peptide, CUB domain, EGF-like 1	1	0	0	1	1
NM_022980	Rcan3	regulator of calcineurin 3	1	0	0	1	1
NM_022994	Dap3	death associated protein 3	1	0	0	1	1
NM_023041	Pex19	peroxisome biogenesis factor 19	1	0	0	1	1
NM_023045	Xpo7	exportin 7	1	0	0	1	1
NM_023046	Asb1	ankyrin repeat and SOCS box-containing protein 1	1	0	0	1	1
NM_023149	Cndp2	CNDP dipeptidase 2 (metallopeptidase M20 family)	1	0	0	1	1
NM_023200	Ppp1r7	protein phosphatase 1, regulatory (inhibitor) subunit 7	1	0	0	1	1
NM_023240	Eef1d	eukaryotic translation elongation factor 1 delta (guanine nucleotide exchange protein)	1	0	0	1	1
NM_023380	Samsn1	SAM domain, SH3 domain and nuclear localization signals, 1	1	0	0	1	1
NM_023403	Mesdc2	mesoderm development candidate 2	1	0	0	1	1
NM_023418	Pgam1	phosphoglycerate mutase 1	1	0	0	1	1
NM_023423	6330407G11Rik	RIKEN cDNA 6330407G11 gene	1	0	0	1	1
NM_023464	Ssna1	Sjogren"s syndrome nuclear autoantigen 1	1	0	0	1	1
NM_023493	Cml5	camello-like 5	1	0	0	1	1
NM_023538	Agk	acylglycerol kinase	1	0	0	1	1
NM_023587	Ptplb	protein tyrosine phosphatase-like (proline instead of catalytic arginine), member b	1	0	0	1	1
NM_023596	Slc29a3	solute carrier family 29 (nucleoside transporters), member 3	1	0	0	1	1
NM_023624	Lrat	lecithin-retinol acyltransferase (phosphatidylcholine-retinol-O-acyltransferase)	1	0	0	1	1
NM_023764	Tollip	toll interacting protein	1	0	0	1	1
NM_023774	4930550L24Rik	RIKEN cDNA 4930550L24 gene	1	0	0	1	1
NM_023884	Ralgps2	Ral GEF with PH domain and SH3 binding motif 2	1	0	0	1	1
NM_024124	Hdac9	histone deacetylase 9	0	0	1	1	1
NM_024174	Mrps23	mitochondrial ribosomal protein S23	1	0	0	1	1
NM_024191	Arl2bp	ADP-ribosylation factor-like 2 binding protein	1	0	0	1	1
NM_024194	Lrrc40	leucine rich repeat containing 40	1	0	0	1	1
NM_024289	Osbpl5	oxysterol binding protein-like 5	1	0	0	1	1
NM_024459	Ppp3r1	protein phosphatase 3, regulatory subunit B, alpha isoform (calcineurin B, type I)	0	0	1	1	1
NM_024467	Zfp319	zinc finger protein 319	1	0	0	1	1
NM_024480	Sh3bp5l	SH3 binding domain protein 5 like	1	0	0	1	1
NM_025285	Stmn2	stathmin-like 2	1	0	0	1	1
NM_025294	Gtlf3b	gene trap locus F3b	1	0	0	1	1
NM_025301	Mrpl17	mitochondrial ribosomal protein L17	1	0	0	1	1
NM_025346	Rmnd5b	required for meiotic nuclear division 5 homolog B (S. cerevisiae)	1	0	0	1	1
NM_025359	Tspan13	tetraspanin 13	1	0	0	1	1
NM_025360	Tmed3	transmembrane emp24 domain containing 3	1	0	0	1	1
NM_025383	Necap2	NECAP endocytosis associated 2	1	0	0	1	1
NM_025419	1110059G10Rik	RIKEN cDNA 1110059G10 gene	1	0	0	1	1
NM_025431	1190005P17Rik	RIKEN cDNA 1190005P17 gene	1	0	0	1	1
NM_025449	Nicn1	nicolin 1	1	0	0	1	1
NM_025454	Ing5	inhibitor of growth family, member 5	1	0	0	1	1
NM_025474	Mrps14	mitochondrial ribosomal protein S14	1	0	0	1	1
NM_025483	Senp7	SUMO1/sentrin specific peptidase 7	1	0	0	1	1
NM_025590	Acot11	acyl-CoA thioesterase 11	1	0	0	1	1
NM_025594	Zmat2	zinc finger, matrin type 2	1	0	0	1	1
NM_025613	Eid1	EP300 interacting inhibitor of differentiation 1	1	0	0	1	1
NM_025626	3110001A13Rik	RIKEN cDNA 3110001A13 gene	1	0	0	1	1
NM_025646	Crls1	cardiolipin synthase 1	1	1	0	1	0
NM_025666	5730410I19Rik	RIKEN cDNA 5730410I19 gene	1	0	0	1	1
NM_025673	Golph3	golgi phosphoprotein 3	1	0	0	1	1
NM_025679	5730470L24Rik	RIKEN cDNA 5730470L24 gene	1	0	0	1	1
NM_025696	Sorcs3	sortilin-related VPS10 domain containing receptor 3	0	0	1	1	1
NM_025705	Dcbld1	discoidin, CUB and LCCL domain containing 1	1	0	0	1	1
NM_025747	4933411K20Rik	RIKEN cDNA 4933411K20 gene	1	0	0	1	1
NM_025755	4933428G09Rik	RIKEN cDNA 4933428G09 gene	1	0	0	1	1
NM_025783	Vps24	vacuolar protein sorting 24 (yeast)	1	0	0	1	1
NM_025800	Ppp1r2	protein phosphatase 1, regulatory (inhibitor) subunit 2	1	0	0	1	1
NM_025811	Nhlrc2	NHL repeat containing 2	1	0	0	1	1
NM_025824	Bzw1	basic leucine zipper and W2 domains 1	0	0	1	1	1
NM_025857	2310007F21Rik	RIKEN cDNA 2310007F21 gene	1	0	0	1	1
NM_025864	Tmem206	transmembrane protein 206	1	0	0	1	1
NM_025910	Mina	myc induced nuclear antigen	1	0	0	1	1
NM_025936	Rars	arginyl-tRNA synthetase	1	0	0	1	1
NM_025948	Lsm14a	LSM14 homolog A (SCD6, S. cerevisiae)	1	0	0	1	1
NM_025949	Rps6ka6	ribosomal protein S6 kinase polypeptide 6	1	0	0	1	1
NM_025985	Ube2g1	ubiquitin-conjugating enzyme E2G 1 (UBC7 homolog, C. elegans)	1	0	0	1	1
NM_026003	Smarca2	SWI/SNF related, matrix associated, actin dependent regulator of chromatin, subfamily a, member 2	0	0	1	1	1
NM_026005	2610301B20Rik	RIKEN cDNA 2610301B20 gene	1	0	0	1	1
NM_026036	Cmtm6	CKLF-like MARVEL transmembrane domain containing 6	1	0	0	1	1
NM_026043	Rnpc3	RNA-binding region (RNP1, RRM) containing 3	1	0	0	1	1
NM_026067	Thex1	three prime histone mRNA exonuclease 1	1	0	0	1	1
NM_026079	Ikbkap	inhibitor of kappa light polypeptide enhancer in B-cells, kinase complex-associated protein	1	0	0	1	1
NM_026138	6330407J23Rik	RIKEN cDNA 6330407J23 gene	1	0	1	0	1
NM_026150	4921536K21Rik	RIKEN cDNA 4921536K21 gene	1	0	0	1	1
NM_026153	5730557B15Rik	RIKEN cDNA 5730557B15 gene	1	0	0	1	1
NM_026164	Pnpla8	patatin-like phospholipase domain containing 8	1	0	0	1	1
NM_026165	Slc25a46	solute carrier family 25, member 46	1	0	0	1	1
NM_026173	1200014M14Rik	RIKEN cDNA 1200014M14 gene	1	0	0	1	1
NM_026176	Pdcl	phosducin-like	1	0	0	1	1
NM_026177	1200011I18Rik	RIKEN cDNA 1200011I18 gene	1	0	0	1	1
NM_026203	Ahi1	Abelson helper integration site 1	1	0	0	1	1
NM_026210	1810036I24Rik	RIKEN cDNA 1810036I24 gene	1	0	0	1	1
NM_026217	Atg12	autophagy-related 12 (yeast)	1	0	0	1	1
NM_026218	Fgfr1op2	FGFR1 oncogene partner 2	1	0	0	1	1
NM_026220	Mfap1a	microfibrillar-associated protein 1A	1	0	0	1	1
NM_026246	Mrpl49	mitochondrial ribosomal protein L49	1	0	0	1	1
NM_026259	Rnf41	ring finger protein 41	1	0	0	1	1
NM_026272	Narf	nuclear prelamin A recognition factor	1	0	0	1	1
NM_026281	Tm7sf3	transmembrane 7 superfamily member 3	1	0	0	1	1
NM_026313	3300001P08Rik	RIKEN cDNA 3300001P08 gene	1	0	0	1	1
NM_026314	Dyx1c1	dyslexia susceptibility 1 candidate 1 homolog (human)	1	0	0	1	1
NM_026380	Rgs8	regulator of G-protein signaling 8	1	0	0	1	1
NM_026390	Ubxd2	UBX domain containing 2	1	0	0	1	1
NM_026417	Yipf4	Yip1 domain family, member 4	1	0	0	1	1
NM_026429	Tpbpb	trophoblast specific protein beta	1	0	0	1	1
NM_026501	1300010M03Rik	RIKEN cDNA 1300010M03 gene	1	0	0	1	1
NM_026505	Bambi	BMP and activin membrane-bound inhibitor, homolog (Xenopus laevis)	1	0	0	1	1
NM_026521	Zfp706	zinc finger protein 706	1	0	0	1	1
NM_026538	Ddx56	DEAD (Asp-Glu-Ala-Asp) box polypeptide 56	1	0	0	1	1
NM_026566	9430023L20Rik	RIKEN cDNA 9430023L20 gene	1	0	0	1	1
NM_026572	Gcsh	glycine cleavage system protein H (aminomethyl carrier)	1	0	0	1	1
NM_026584	Gtf2e2	general transcription factor II E, polypeptide 2 (beta subunit)	1	0	0	1	1
NM_026647	Zdhhc21	zinc finger, DHHC domain containing 21	1	0	0	1	1
NM_026651	Pomgnt1	protein O-linked mannose beta1,2-N-acetylglucosaminyltransferase	0	0	1	1	1
NM_026670	Zmym1	zinc finger, MYM domain containing 1	1	0	0	1	1
NM_026685	Tmem174	transmembrane protein 174	1	0	0	1	1
NM_026690	0610012D14Rik	RIKEN cDNA 0610012D14 gene	1	0	0	1	1
NM_026697	Rab14	RAB14, member RAS oncogene family	0	0	1	1	1
NM_026828	D2Bwg1335e	DNA segment, Chr 2, Brigham & Women"s Genetics 1335 expressed	1	0	0	1	1
NM_026887	Ap1s2	adaptor-related protein complex 1, sigma 2 subunit	1	0	0	1	1
NM_026891	Cdan1	congenital dyserythropoietic anemia, type I (human)	1	0	0	1	1
NM_026908	Cab39l	calcium binding protein 39-like	1	0	0	1	1
NM_026921	Isca1	iron-sulfur cluster assembly 1 homolog (S. cerevisiae)	1	0	0	1	1
NM_026936	Oxa1l	oxidase assembly 1-like	1	0	0	1	1
NM_026989	Sfrs11	splicing factor, arginine/serine-rich 11	1	0	0	1	1
NM_027045	Gcap14	granule cell antiserum positive 14	1	0	0	1	1
NM_027052	Slc38a4	solute carrier family 38, member 4	1	0	0	1	1
NM_027166	Ypel5	yippee-like 5 (Drosophila)	1	0	0	1	1
NM_027192	Ttl	tubulin tyrosine ligase	1	0	0	1	1
NM_027194	Tm2d2	TM2 domain containing 2	1	0	0	1	1
NM_027264	Zfp715	zinc finger protein 715	1	0	0	1	1
NM_027307	Golm1	golgi membrane protein 1	1	0	0	1	1
NM_027308	2210010C17Rik	RIKEN cDNA 2210010C17 gene	1	0	0	1	1
NM_027315	Ube2q1	ubiquitin-conjugating enzyme E2Q (putative) 1	1	0	0	1	1
NM_027418	Mapk6	mitogen-activated protein kinase 6	0	0	1	1	1
NM_027425	Rufy2	RUN and FYVE domain-containing 2	1	0	0	1	1
NM_027432	Wdr77	WD repeat domain 77	1	0	0	1	1
NM_027448	Lca5	Leber congenital amaurosis 5 (human)	1	0	0	1	1
NM_027460	Slc25a33	solute carrier family 25, member 33	1	0	0	1	1
NM_027464	5730469M10Rik	RIKEN cDNA 5730469M10 gene	1	0	0	1	1
NM_027475	Ecd	ecdysoneless homolog (Drosophila)	1	0	0	1	1
NM_027491	Rragd	Ras-related GTP binding D	1	0	0	1	1
NM_027498	BC033915	cDNA sequence BC033915	1	0	0	1	1
NM_027562	Clec2g	C-type lectin domain family 2, member g	1	0	0	1	1
NM_027569	Spag9	sperm associated antigen 9	1	0	0	1	1
NM_027658	Hexim2	hexamthylene bis-acetamide inducible 2	1	0	0	1	1
NM_027695	Oxsm	3-oxoacyl-ACP synthase, mitochondrial	1	0	0	1	1
NM_027741	Mro	Maestro	1	0	0	1	1
NM_027769	Cpne3	copine III	1	0	0	1	1
NM_027782	Kctd6	potassium channel tetramerisation domain containing 6	1	0	0	1	1
NM_027799	Ankrd40	ankyrin repeat domain 40	1	0	0	1	1
NM_027859	Rnf215	ring finger protein 215	1	0	0	1	1
NM_027915	Ap2b1	adaptor-related protein complex 2, beta 1 subunit	1	0	0	1	1
NM_027927	Ints12	integrator complex subunit 12	1	0	0	1	1
NM_027976	Acsl5	acyl-CoA synthetase long-chain family member 5	1	0	0	1	1
NM_028013	Endod1	endonuclease domain containing 1	1	0	0	1	1
NM_028015	Lass5	LAG1 homolog, ceramide synthase 5	1	0	0	1	1
NM_028017	Napg	N-ethylmaleimide sensitive fusion protein attachment protein gamma	1	0	0	1	1
NM_028018	2400003C14Rik	RIKEN cDNA 2400003C14 gene	1	0	0	1	1
NM_028024	Nkiras2	NFKB inhibitor interacting Ras-like protein 2	1	1	0	1	0
NM_028059	Zfp654	zinc finger protein 654	1	0	0	1	1
NM_028061	Cyb561d1	cytochrome b-561 domain containing 1	1	0	0	1	1
NM_028072	Sulf2	sulfatase 2	1	0	0	1	1
NM_028099	Dusp11	dual specificity phosphatase 11 (RNA/RNP complex 1-interacting)	1	0	0	1	1
NM_028105	Adck1	aarF domain containing kinase 1	1	0	0	1	1
NM_028108	Nat13	N-acetyltransferase 13	1	0	0	1	1
NM_028135	Tmem163	transmembrane protein 163	1	0	0	1	1
NM_028148	Sfrs2ip	splicing factor, arginine/serine-rich 2, interacting protein	1	0	0	1	1
NM_028150	Supt7l	suppressor of Ty 7 (S. cerevisiae)-like	1	0	0	1	1
NM_028152	Mms19	MMS19 (MET18 S. cerevisiae)	1	0	0	1	1
NM_028194	Fryl	furry homolog-like (Drosophila)	1	0	0	1	1
NM_028238	Rab38	Rab38, member of RAS oncogene family	1	0	0	1	1
NM_028291	Pan3	PAN3 polyA specific ribonuclease subunit homolog (S. cerevisiae)	1	0	0	1	1
NM_028335	Zfp248	zinc finger protein 248	1	0	0	1	1
NM_028352	Pgm3	phosphoglucomutase 3	1	0	0	1	1
NM_028370	Pot1b	protection of telomeres 1B	1	0	0	1	1
NM_028372	2900024O10Rik	RIKEN cDNA 2900024O10 gene	1	0	0	1	1
NM_028385	Setd5	SET domain containing 5	0	0	1	1	1
NM_028404	Top1mt	DNA topoisomerase 1, mitochondrial	1	0	0	1	1
NM_028407	Gcap14	granule cell antiserum positive 14	1	0	0	1	1
NM_028493	Rhobtb3	Rho-related BTB domain containing 3	1	0	0	1	1
NM_028596	2410025L10Rik	RIKEN cDNA 2410025L10 gene	1	0	0	1	1
NM_028658	Ccdc128	coiled-coil domain containing 128	1	0	0	1	1
NM_028662	Slc35b2	solute carrier family 35, member B2	1	0	0	1	1
NM_028734	Steap2	six transmembrane epithelial antigen of prostate 2	1	0	0	1	1
NM_028763	Cbx6	chromobox homolog 6	1	0	0	1	1
NM_028815	Cep97	centrosomal protein 97	1	0	0	1	1
NM_028840	Armc1	armadillo repeat containing 1	1	0	0	1	1
NM_028846	Usp20	ubiquitin specific peptidase 20	1	0	0	1	1
NM_028888	4931428F04Rik	RIKEN cDNA 4931428F04 gene	1	0	0	1	1
NM_028933	1300010M03Rik	RIKEN cDNA 1300010M03 gene	1	0	0	1	1
NM_028981	Cacna1d	calcium channel, voltage-dependent, L type, alpha 1D subunit	1	0	0	1	1
NM_028990	Tmem168	transmembrane protein 168	1	0	0	1	1
NM_029062	4930521A18Rik	RIKEN cDNA 4930521A18 gene	1	0	0	1	1
NM_029083	Ddit4	DNA-damage-inducible transcript 4	0	0	1	1	1
NM_029101	1110014J01Rik	RIKEN cDNA 1110014J01 gene	1	0	0	1	1
NM_029148	Txndc13	thioredoxin domain containing 13	1	0	0	1	1
NM_029153	Scamp1	secretory carrier membrane protein 1	0	0	1	1	1
NM_029252	4930563D23Rik	RIKEN cDNA 4930563D23 gene	1	0	0	1	1
NM_029277	Arhgap12	Rho GTPase activating protein 12	1	0	0	1	1
NM_029282	2610036D13Rik	RIKEN cDNA 2610036D13 gene	1	0	0	1	1
NM_029331	1700019G17Rik	RIKEN cDNA 1700019G17 gene	1	0	0	1	1
NM_029352	Dusp9	dual specificity phosphatase 9	1	0	0	1	1
NM_029357	Pcdh1	protocadherin 1	1	1	0	1	0
NM_029436	Klhl24	kelch-like 24 (Drosophila)	1	0	0	1	1
NM_029456	Saps3	SAPS domain family, member 3	1	0	0	1	1
NM_029466	Arl5b	ADP-ribosylation factor-like 5B	1	0	0	1	1
NM_029508	Pcgf5	polycomb group ring finger 5	1	0	0	1	1
NM_029512	5830472M02Rik	RIKEN cDNA 5830472M02 gene	1	0	0	1	1
NM_029522	Gpsm2	G-protein signalling modulator 2 (AGS3-like, C. elegans)	1	0	0	1	1
NM_029528	6330503C03Rik	RIKEN cDNA 6330503C03 gene	1	0	0	1	1
NM_029536	Gpr165	G protein-coupled receptor 165	1	0	0	1	1
NM_029571	Kti12	KTI12 homolog, chromatin associated (S. cerevisiae)	1	0	0	1	1
NM_029572	Txndc4	thioredoxin domain containing 4 (endoplasmic reticulum)	1	0	0	1	1
NM_029688	Srxn1	sulfiredoxin 1 homolog (S. cerevisiae)	1	0	0	1	1
NM_029721	Snx27	sorting nexin family member 27	1	0	0	1	1
NM_029734	2410187C16Rik	RIKEN cDNA 2410187C16 gene	1	0	0	1	1
NM_029741	Ppfia3	protein tyrosine phosphatase, receptor type, f polypeptide (PTPRF), interacting protein (liprin), alpha 3	1	0	0	1	1
NM_029749	Usp42	ubiquitin specific peptidase 42	0	0	1	1	1
NM_029752	Bri3bp	Bri3 binding protein	1	0	0	1	1
NM_029761	Dok5	docking protein 5	1	0	0	1	1
NM_029786	Pomgnt1	protein O-linked mannose beta1,2-N-acetylglucosaminyltransferase	0	0	1	1	1
NM_029788	Rnft1	ring finger protein, transmembrane 1	1	0	0	1	1
NM_029814	Chmp5	chromatin modifying protein 5	1	0	0	1	1
NM_029847	Arsk	arylsulfatase K	1	0	0	1	1
NM_029879	Rgs7bp	regulator of G-protein signalling 7 binding protein	1	0	0	1	1
NM_029885	Gabpb2	GA repeat binding protein, beta 2	1	0	0	1	1
NM_029931	Mllt3	myeloid/lymphoid or mixed-lineage leukemia (trithorax homolog, Drosophila); translocated to, 3	1	0	0	1	1
NM_029983	Sla2	Src-like-adaptor 2	1	0	0	1	1
NM_029992	Tchp	trichoplein, keratin filament binding	1	0	0	1	1
NM_030014	Hook1	hook homolog 1 (Drosophila)	1	0	0	1	1
NM_030060	Batf3	basic leucine zipper transcription factor, ATF-like 3	1	0	0	1	1
NM_030113	Arhgap10	Rho GTPase activating protein 10	1	0	0	1	1
NM_030132	D530033C11Rik	RIKEN cDNA D530033C11 gene	1	0	0	1	1
NM_030138	Centb2	centaurin, beta 2	1	0	0	1	1
NM_030143	Ddit4l	DNA-damage-inducible transcript 4-like	1	0	0	1	1
NM_030168	4921505C17Rik	RIKEN cDNA 4921505C17 gene	1	0	0	1	1
NM_030174	Mctp1	multiple C2 domains, transmembrane 1	1	0	0	1	1
NM_030178	Brpf1	bromodomain and PHD finger containing, 1	0	0	1	1	1
NM_030201	Stch	stress 70 protein chaperone, microsome-associated, human homolog	1	0	0	1	1
NM_030203	Tspyl4	TSPY-like 4	1	0	0	1	1
NM_030206	Cygb	cytoglobin	1	0	0	1	1
NM_030229	Polr3h	polymerase (RNA) III (DNA directed) polypeptide H	1	0	0	1	1
NM_030236	Fbxo34	F-box protein 34	1	0	0	1	1
NM_030243	Rbm43	RNA binding motif protein 43	1	0	0	1	1
NM_030260	Zxdc	ZXD family zinc finger C	1	0	0	1	1
NM_030554	Rab27b	RAB27b, member RAS oncogene family	1	0	0	1	1
NM_030690	Rai14	retinoic acid induced 14	1	0	0	1	1
NM_030692	Sacm1l	SAC1 (suppressor of actin mutations 1, homolog)-like (S. cerevisiae)	0	0	1	1	1
NM_030695	Lrba	LPS-responsive beige-like anchor	1	0	0	1	1
NM_030699	Ntng1	netrin G1	1	0	0	1	1
NM_030706	Trim2	tripartite motif-containing 2	0	0	1	1	1
NM_030732	Tbl1xr1	transducin (beta)-like 1X-linked receptor 1	1	0	0	1	1
NM_030750	Sgpp1	sphingosine-1-phosphate phosphatase 1	1	0	0	1	1
NM_031179	Sf3b1	splicing factor 3b, subunit 1	1	0	0	1	1
NM_031182	Tcfap4	transcription factor AP4	0	0	1	1	1
NM_031186	Ndst3	N-deacetylase/N-sulfotransferase (heparan glucosaminyl) 3	1	0	0	1	1
NM_031379	Tktl1	transketolase-like 1	1	0	0	1	1
NM_031382	Tex16	testis expressed gene 16	1	0	0	1	1
NM_031494	Zfp275	zinc finger protein 275	1	0	0	1	1
NM_031884	Abcg5	ATP-binding cassette, sub-family G (WHITE), member 5	1	0	0	1	1
NM_031997	Tmem2	transmembrane protein 2	1	0	0	1	1
NM_031999	Gpr137b	G protein-coupled receptor 137B	1	0	0	1	1
NM_032005	Tbx19	T-box 19	1	0	0	1	1
NM_033077	D1Pas1	DNA segment, Chr 1, Pasteur Institute 1	1	0	0	1	1
NM_033078	Klrk1	killer cell lectin-like receptor subfamily K, member 1	1	0	0	1	1
NM_033320	Glce	glucuronyl C5-epimerase	1	0	0	1	1
NM_033474	Arvcf	armadillo repeat gene deleted in velo-cardio-facial syndrome	1	0	0	1	1
NM_033521	Laptm4b	lysosomal-associated protein transmembrane 4B	1	0	0	1	1
NM_033525	Npnt	nephronectin	1	0	0	1	1
NM_033565	Aff4	AF4/FMR2 family, member 4	1	0	0	1	1
NM_033567	Cecr6	cat eye syndrome chromosome region, candidate 6 homolog (human)	1	0	0	1	1
NM_033577	Pcdhgb5	protocadherin gamma subfamily B, 5	1	0	0	1	1
NM_033592	Pcdhga9	protocadherin gamma subfamily A, 9	1	0	0	1	1
NM_033602	Peli2	pellino 2	1	0	0	1	1
NM_033603	Amn	amnionless	1	0	0	1	1
NM_033604	Rnf111	ring finger 111	0	0	1	1	1
NM_033605	Dach2	dachshund 2 (Drosophila)	1	0	0	1	1
NM_052977	Adarb2	adenosine deaminase, RNA-specific, B2	1	0	0	1	1
NM_053072	Fgd6	FYVE, RhoGEF and PH domain containing 6	1	0	0	1	1
NM_053107	Gpr45	G protein-coupled receptor 45	1	0	0	1	1
NM_053143	Pcdhb18	protocadherin beta 18	1	0	0	1	1
NM_053155	Clmn	calmin	1	0	0	1	1
NM_053158	Mrpl1	mitochondrial ribosomal protein L1	1	0	0	1	1
NM_053165	Clec2h	C-type lectin domain family 2, member h	1	0	0	1	1
NM_053170	Trim33	tripartite motif-containing 33	1	0	0	1	1
NM_053242	Foxp2	forkhead box P2	1	0	0	1	1
NM_053263	Hnrnpa3	heterogeneous nuclear ribonucleoprotein A3	1	0	0	1	1
NM_054041	Antxr1	anthrax toxin receptor 1	1	0	0	1	1
NM_054043	Msi2	Musashi homolog 2 (Drosophila)	1	0	0	1	1
NM_054050	Rapgef1	Rap guanine nucleotide exchange factor (GEF) 1	1	0	0	1	1
NM_054051	Pip4k2b	phosphatidylinositol-5-phosphate 4-kinase, type II, beta	1	0	0	1	1
NM_054052	B3gnt5	UDP-GlcNAc:betaGal beta-1,3-N-acetylglucosaminyltransferase 5	1	0	0	1	1
NM_054068	Vsx1	visual system homeobox 1 homolog (zebrafish)	1	0	0	1	1
NM_054078	Baz2a	bromodomain adjacent to zinc finger domain, 2A	1	0	0	1	1
NM_054087	Slc19a2	solute carrier family 19 (thiamine transporter), member 2	1	0	0	1	1
NM_057172	Fubp1	far upstream element (FUSE) binding protein 1	1	0	0	1	1
NM_080285	Cttnbp2	cortactin binding protein 2	1	0	0	1	1
NM_080444	Asb10	ankyrin repeat and SOCS box-containing protein 10	1	0	0	1	1
NM_080445	B3galt6	UDP-Gal:betaGal beta 1,3-galactosyltransferase, polypeptide 6	1	0	0	1	1
NM_080450	Gje1	gap junction membrane channel protein epsilon 1	1	0	0	1	1
NM_080464	Ppp1r3a	protein phosphatase 1, regulatory (inhibitor) subunit 3A	1	0	0	1	1
NM_080555	Ppap2b	phosphatidic acid phosphatase type 2B	1	0	0	1	1
NM_080557	Snx4	sorting nexin 4	1	0	0	1	1
NM_080563	Rnf144a	ring finger protein 144A	1	0	0	1	1
NM_080848	Wdr5	WD repeat domain 5	1	0	0	1	1
NM_080850	Pask	PAS domain containing serine/threonine kinase	1	0	0	1	1
NM_130450	Elovl6	ELOVL family member 6, elongation of long chain fatty acids (yeast)	1	0	0	1	1
NM_130862	Baiap2	brain-specific angiogenesis inhibitor 1-associated protein 2	1	0	0	1	1
NM_130878	Pcdh21	protocadherin 21	1	0	0	1	1
NM_130879	Usp48	ubiquitin specific peptidase 48	1	0	0	1	1
NM_130890	Capn8	calpain 8	1	0	0	1	1
NM_133218	Zfp704	zinc finger protein 704	1	0	0	1	1
NM_133222	Eltd1	EGF, latrophilin seven transmembrane domain containing 1	1	0	0	1	1
NM_133225	Acbd3	acyl-Coenzyme A binding domain containing 3	0	0	1	1	1
NM_133234	Bbc3	Bcl-2 binding component 3	0	0	1	1	1
NM_133247	Usp33	ubiquitin specific peptidase 33	1	0	0	1	1
NM_133345	Ing4	inhibitor of growth family, member 4	1	0	0	1	1
NM_133352	Tm9sf3	transmembrane 9 superfamily member 3	0	0	1	1	1
NM_133649	Slc12a6	solute carrier family 12, member 6	1	0	0	1	1
NM_133666	Ndufv1	NADH dehydrogenase (ubiquinone) flavoprotein 1	1	0	0	1	1
NM_133685	Rab31	RAB31, member RAS oncogene family	1	0	0	1	1
NM_133697	1110003E01Rik	RIKEN cDNA 1110003E01 gene	1	0	0	1	1
NM_133710	Ctdspl	CTD (carboxy-terminal domain, RNA polymerase II, polypeptide A) small phosphatase-like	1	0	0	1	1
NM_133718	Tmem30a	transmembrane protein 30A	1	0	0	1	1
NM_133737	Lancl2	LanC (bacterial lantibiotic synthetase component C)-like 2	1	0	0	1	1
NM_133738	Antxr2	anthrax toxin receptor 2	0	0	1	1	1
NM_133741	Snrk	SNF related kinase	1	0	0	1	1
NM_133748	Insig2	insulin induced gene 2	1	0	0	1	1
NM_133775	Il33	interleukin 33	1	0	0	1	1
NM_133788	Icmt	isoprenylcysteine carboxyl methyltransferase	1	0	0	1	1
NM_133805	Cops8	COP9 (constitutive photomorphogenic) homolog, subunit 8 (Arabidopsis thaliana)	1	0	0	1	1
NM_133910	Tbc1d14	TBC1 domain family, member 14	0	0	1	1	1
NM_133919	Aff1	AF4/FMR2 family, member 1	1	0	0	1	1
NM_133993	Pwp1	PWP1 homolog (S. cerevisiae)	1	0	0	1	1
NM_134064	Rnf44	ring finger protein 44	1	0	0	1	1
NM_134115	Stk38	serine/threonine kinase 38	1	0	0	1	1
NM_134135	Slc39a3	solute carrier family 39 (zinc transporter), member 3	1	0	0	1	1
NM_134141	Ciapin1	cytokine induced apoptosis inhibitor 1	1	0	0	1	1
NM_134437	Il17rd	interleukin 17 receptor D	1	0	0	1	1
NM_138301	Trpm2	transient receptor potential cation channel, subfamily M, member 2	1	0	0	1	1
NM_138313	Bmf	Bcl2 modifying factor	1	0	0	1	1
NM_138599	Tomm70a	translocase of outer mitochondrial membrane 70 homolog A (yeast)	1	0	0	1	1
NM_138651	Cds2	CDP-diacylglycerol synthase (phosphatidate cytidylyltransferase) 2	1	0	0	1	1
NM_138657	Socs7	suppressor of cytokine signaling 7	0	0	1	1	1
NM_138667	Map3k7ip2	mitogen-activated protein kinase kinase kinase 7 interacting protein 2	0	0	1	1	1
NM_138679	Ash1l	ash1 (absent, small, or homeotic)-like (Drosophila)	0	0	1	1	1
NM_138681	Bcas3	breast carcinoma amplified sequence 3	1	0	0	1	1
NM_138682	Lrrc4	leucine rich repeat containing 4	1	0	0	1	1
NM_138683	Rspo1	R-spondin homolog (Xenopus laevis)	1	0	0	1	1
NM_138742	Nap1l3	nucleosome assembly protein 1-like 3	1	0	0	1	1
NM_138754	Cdipt	CDP-diacylglycerol--inositol 3-phosphatidyltransferase (phosphatidylinositol synthase)	1	0	0	1	1
NM_138953	Ell2	elongation factor RNA polymerase II 2	1	0	0	1	1
NM_139141	Zfp192	zinc finger protein 192	1	0	0	1	1
NM_139145	Hlcs	holocarboxylase synthetase (biotin- [propriony-Coenzyme A-carboxylase (ATP-hydrolysing)] ligase)	1	0	0	1	1
NM_139200	Pscdbp	pleckstrin homology, Sec7 and coiled-coil domains, binding protein	1	0	0	1	1
NM_139232	Fgd4	FYVE, RhoGEF and PH domain containing 4	1	0	0	1	1
NM_139233	Fgd4	FYVE, RhoGEF and PH domain containing 4	1	0	0	1	1
NM_139295	Mcfd2	multiple coagulation factor deficiency 2	1	0	0	1	1
NM_144539	Slamf7	SLAM family member 7	1	0	0	1	1
NM_144545	Eif3j	eukaryotic translation initiation factor 3, subunit J	1	0	0	1	1
NM_144551	Trib2	tribbles homolog 2 (Drosophila)	1	0	0	1	1
NM_144552	Stxbp6	syntaxin binding protein 6 (amisyn)	1	0	0	1	1
NM_144794	Tmem63a	transmembrane protein 63a	1	0	0	1	1
NM_144795	Pycr1	pyrroline-5-carboxylate reductase 1	1	0	0	1	1
NM_144797	Metrnl	meteorin, glial cell differentiation regulator-like	1	0	0	1	1
NM_144814	Rcor3	REST corepressor 3	0	0	1	1	1
NM_144818	Ncaph	non-SMC condensin I complex, subunit H	1	0	0	1	1
NM_144832	BC017643	cDNA sequence BC017643	1	0	0	1	1
NM_144842	Zmym5	zinc finger, MYM-type 5	1	0	0	1	1
NM_144872	Eml3	echinoderm microtubule associated protein like 3	1	0	0	1	1
NM_144902	Slc35a3	solute carrier family 35 (UDP-N-acetylglucosamine (UDP-GlcNAc) transporter), member 3	1	0	0	1	1
NM_144905	6330416G13Rik	RIKEN cDNA 6330416G13 gene	1	0	0	1	1
NM_144906	Sgip1	SH3-domain GRB2-like (endophilin) interacting protein 1	1	0	0	1	1
NM_144916	Tmem150	transmembrane protein 150	1	0	0	1	1
NM_144933	Med17	mediator complex subunit 17	1	0	0	1	1
NM_145125	Brwd1	bromodomain and WD repeat domain containing 1	1	0	0	1	1
NM_145142	Chst10	carbohydrate sulfotransferase 10	1	0	0	1	1
NM_145224	Tbx22	T-box 22	1	0	0	1	1
NM_145360	Idi1	isopentenyl-diphosphate delta isomerase	1	0	0	1	1
NM_145381	Lactb2	lactamase, beta 2	1	0	0	1	1
NM_145412	5830457O10Rik	RIKEN cDNA 5830457O10 gene	1	0	0	1	1
NM_145457	Paip1	polyadenylate binding protein-interacting protein 1	1	0	0	1	1
NM_145458	Pxk	PX domain containing serine/threonine kinase	1	0	0	1	1
NM_145468	Skp2	S-phase kinase-associated protein 2 (p45)	1	0	0	1	1
NM_145470	Depdc6	DEP domain containing 6	1	0	0	1	1
NM_145475	Cerk	ceramide kinase	1	0	0	1	1
NM_145476	Tbc1d22a	TBC1 domain family, member 22a	1	0	0	1	1
NM_145486	2014-03-02	membrane-associated ring finger (C3HC4) 2	1	0	0	1	1
NM_145491	Rhoq	ras homolog gene family, member Q	1	0	0	1	1
NM_145492	Zfp521	zinc finger protein 521	1	0	0	1	1
NM_145494	Me2	malic enzyme 2, NAD(+)-dependent, mitochondrial	1	0	0	1	1
NM_145505	AI450540	expressed sequence AI450540	1	0	0	1	1
NM_145509	5430435G22Rik	RIKEN cDNA 5430435G22 gene	1	0	0	1	1
NM_145517	Ormdl1	ORM1-like 1 (S. cerevisiae)	1	0	0	1	1
NM_145518	Ndufs1	NADH dehydrogenase (ubiquinone) Fe-S protein 1	1	0	0	1	1
NM_145521	Ppapdc3	phosphatidic acid phosphatase type 2 domain containing 3	1	0	0	1	1
NM_145525	Osbpl6	oxysterol binding protein-like 6	1	0	0	1	1
NM_145526	P2rx3	purinergic receptor P2X, ligand-gated ion channel, 3	1	0	0	1	1
NM_145545	Gbp6	guanylate binding protein 6	1	0	0	1	1
NM_145556	Tardbp	TAR DNA binding protein	1	0	0	1	1
NM_145585	Thumpd1	THUMP domain containing 1	1	0	0	1	1
NM_145597	Tmem161a	transmembrane protein 161A	1	0	0	1	1
NM_145602	Ndrg4	N-myc downstream regulated gene 4	0	0	1	1	1
NM_145606	Chmp1a	chromatin modifying protein 1A	1	0	0	1	1
NM_145618	Narg2	NMDA receptor-regulated gene 2	1	0	0	1	1
NM_145619	Parp3	poly (ADP-ribose) polymerase family, member 3	1	0	0	1	1
NM_145742	Dhx35	DEAH (Asp-Glu-Ala-His) box polypeptide 35	1	0	0	1	1
NM_145840	Rgs9bp	regulator of G-protein signalling 9 binding protein	1	0	0	1	1
NM_145890	Grhl1	grainyhead-like 1 (Drosophila)	1	0	0	1	1
NM_145951	Enox2	ecto-NOX disulfide-thiol exchanger 2	1	0	0	1	1
NM_145958	Kbtbd2	kelch repeat and BTB (POZ) domain containing 2	0	0	1	1	1
NM_145975	Ddx46	DEAD (Asp-Glu-Ala-Asp) box polypeptide 46	1	0	0	1	1
NM_146005	Ank3	ankyrin 3, epithelial	1	0	0	1	1
NM_146040	Cdca7l	cell division cycle associated 7 like	1	0	0	1	1
NM_146062	Pphln1	periphilin 1	1	0	0	1	1
NM_146102	Afap1l2	actin filament associated protein 1-like 2	1	0	0	1	1
NM_146123	Cacnb4	calcium channel, voltage-dependent, beta 4 subunit	1	0	0	1	1
NM_146126	Sord	sorbitol dehydrogenase	1	0	0	1	1
NM_146128	Dlgap4	discs, large homolog-associated protein 4 (Drosophila)	1	0	0	1	1
NM_146130	Hnrnpa3	heterogeneous nuclear ribonucleoprotein A3	1	0	0	1	1
NM_146136	Slc16a4	solute carrier family 16 (monocarboxylic acid transporters), member 4	1	1	0	1	0
NM_146169	Paip2b	poly(A) binding protein interacting protein 2B	1	0	0	1	1
NM_146253	Zbtb6	zinc finger and BTB domain containing 6	1	0	0	1	1
NM_147220	Abca9	ATP-binding cassette, sub-family A (ABC1), member 9	1	0	0	1	1
NM_148925	Fyco1	FYVE and coiled-coil domain containing 1	1	0	0	1	1
NM_148948	Dicer1	Dicer1, Dcr-1 homolog (Drosophila)	1	0	0	1	1
NM_152809	Csnk1g3	casein kinase 1, gamma 3	1	0	0	1	1
NM_152895	Jarid1b	jumonji, AT rich interactive domain 1B (Rbp2 like)	1	0	0	1	1
NM_153119	Plekho2	pleckstrin homology domain containing, family O member 2	1	0	0	1	1
NM_153136	Nudt18	nudix (nucleoside diphosphate linked moiety X)-type motif 18	1	0	0	1	1
NM_153139	Slc36a1	solute carrier family 36 (proton/amino acid symporter), member 1	1	0	0	1	1
NM_153157	Olfm3	olfactomedin 3	1	0	0	1	1
NM_153198	Hbp1	high mobility group box transcription factor 1	1	0	0	1	1
NM_153412	Phldb2	pleckstrin homology-like domain, family B, member 2	1	0	0	1	1
NM_153458	Olfm3	olfactomedin 3	1	0	0	1	1
NM_153484	Tef	thyrotroph embryonic factor	1	0	0	1	1
NM_153506	Clec2e	C-type lectin domain family 2, member e	1	0	0	1	1
NM_153508	Clstn3	calsyntenin 3	1	0	0	1	1
NM_153541	Zbtb8	zinc finger and BTB domain containing 8	1	0	0	1	1
NM_153543	Aldh1l2	aldehyde dehydrogenase 1 family, member L2	1	0	0	1	1
NM_153546	Mboat1	membrane bound O-acyltransferase domain containing 1	1	0	0	1	1
NM_153560	C230093N12Rik	RIKEN cDNA C230093N12 gene	1	0	0	1	1
NM_153567	Slain2	SLAIN motif family, member 2	0	0	1	1	1
NM_153570	Noc4l	nucleolar complex associated 4 homolog (S. cerevisiae)	1	0	0	1	1
NM_153587	Rps6ka5	ribosomal protein S6 kinase, polypeptide 5	1	0	0	1	1
NM_153594	Pcmtd2	protein-L-isoaspartate (D-aspartate) O-methyltransferase domain containing 2	1	0	0	1	1
NM_153600	Ttc26	tetratricopeptide repeat domain 26	1	0	0	1	1
NM_153774	Ipo9	importin 9	1	0	0	1	1
NM_153789	Mylip	myosin regulatory light chain interacting protein	1	0	0	1	1
NM_153794	4933403F05Rik	RIKEN cDNA 4933403F05 gene	1	0	0	1	1
NM_170669	Rps15a	ribosomal protein S15a	1	0	0	1	1
NM_170687	Ank3	ankyrin 3, epithelial	1	0	0	1	1
NM_170688	Ank3	ankyrin 3, epithelial	1	0	0	1	1
NM_170689	Ank3	ankyrin 3, epithelial	1	0	0	1	1
NM_170728	Ank3	ankyrin 3, epithelial	1	0	0	1	1
NM_170729	Ank3	ankyrin 3, epithelial	1	0	0	1	1
NM_170730	Ank3	ankyrin 3, epithelial	1	0	0	1	1
NM_171824	Pgbd5	piggyBac transposable element derived 5	1	0	0	1	1
NM_172122	Crocc	ciliary rootlet coiled-coil, rootletin	1	0	0	1	1
NM_172124	B3gat2	beta-1,3-glucuronyltransferase 2 (glucuronosyltransferase S)	1	0	0	1	1
NM_172154	Lcor	ligand dependent nuclear receptor corepressor	0	0	1	1	1
NM_172255	Brwd2	bromodomain and WD repeat domain containing 2	1	0	0	1	1
NM_172282	Tmco3	transmembrane and coiled-coil domains 3	1	0	0	1	1
NM_172283	Fuk	fucokinase	1	0	0	1	1
NM_172291	Foxred1	FAD-dependent oxidoreductase domain containing 1	1	0	0	1	1
NM_172300	Ube2z	ubiquitin-conjugating enzyme E2Z (putative)	1	0	0	1	1
NM_172396	9130011J15Rik	RIKEN cDNA 9130011J15 gene	1	0	0	1	1
NM_172397	Limd2	LIM domain containing 2	1	0	0	1	1
NM_172399	A930038C07Rik	RIKEN cDNA A930038C07 gene	1	0	0	1	1
NM_172402	Slc25a32	solute carrier family 25, member 32	1	0	0	1	1
NM_172414	2810002I04Rik	RIKEN cDNA 2810002I04 gene	1	0	0	1	1
NM_172416	Ostm1	osteopetrosis associated transmembrane protein 1	1	0	0	1	1
NM_172420	Ppp1r1c	protein phosphatase 1, regulatory (inhibitor) subunit 1C	1	0	0	1	1
NM_172436	Slc25a12	solute carrier family 25 (mitochondrial carrier, Aralar), member 12	1	0	0	1	1
NM_172445	Wdr37	WD repeat domain 37	1	0	0	1	1
NM_172458	9030612M13Rik	RIKEN cDNA 9030612M13 gene	1	0	0	1	1
NM_172463	Sned1	sushi, nidogen and EGF-like domains 1	1	0	0	1	1
NM_172468	Snx30	sorting nexin family member 30	1	0	0	1	1
NM_172471	Itih5	inter-alpha (globulin) inhibitor H5	1	0	0	1	1
NM_172484	E030049G20Rik	RIKEN cDNA E030049G20 gene	1	0	0	1	1
NM_172513	D1Ertd53e	DNA segment, Chr 1, ERATO Doi 53, expressed	0	0	1	1	1
NM_172518	Fbxo42	F-box protein 42	1	0	0	1	1
NM_172524	9530066K23Rik	RIKEN cDNA 9530066K23 gene	1	0	0	1	1
NM_172530	She	src homology 2 domain-containing transforming protein E	1	0	0	1	1
NM_172550	A130042E20Rik	RIKEN cDNA A130042E20 gene	1	0	0	1	1
NM_172563	Hlf	hepatic leukemia factor	1	0	0	1	1
NM_172588	Serinc5	serine incorporator 5	1	0	0	1	1
NM_172591	Fcho2	FCH domain only 2	1	0	0	1	1
NM_172619	Adamts10	a disintegrin-like and metallopeptidase (reprolysin type) with thrombospondin type 1 motif, 10	1	0	0	1	1
NM_172627	Pggt1b	protein geranylgeranyltransferase type I, beta subunit	1	0	0	1	1
NM_172661	5830434P21Rik	RIKEN cDNA 5830434P21 gene	1	0	0	1	1
NM_172666	Agps	alkylglycerone phosphate synthase	1	0	0	1	1
NM_172672	Ganc	glucosidase, alpha; neutral C	1	0	0	1	1
NM_172685	Slc25a24	solute carrier family 25 (mitochondrial carrier, phosphate carrier), member 24	1	1	0	1	0
NM_172699	Foxj3	forkhead box J3	1	0	0	1	1
NM_172721	Fbxw8	F-box and WD-40 domain protein 8	1	0	0	1	1
NM_172734	Stk38l	serine/threonine kinase 38 like	1	0	0	1	1
NM_172741	4931406P16Rik	RIKEN cDNA 4931406P16 gene	0	0	1	1	1
NM_172754	AI449175	expressed sequence AI449175	1	0	0	1	1
NM_172772	B230380D07Rik	RIKEN cDNA B230380D07 gene	1	0	0	1	1
NM_172779	Ddx26b	DEAD/H (Asp-Glu-Ala-Asp/His) box polypeptide 26B	1	0	0	1	1
NM_172781	Klhl4	kelch-like 4 (Drosophila)	1	0	0	1	1
NM_172790	Ankrd52	ankyrin repeat domain 52	0	0	1	1	1
NM_172814	Lrp12	low density lipoprotein-related protein 12	1	0	0	1	1
NM_172843	Tor1aip2	torsin A interacting protein 2	1	0	0	1	1
NM_172844	Fmo9	flavin containing monooxygenase 9	1	0	0	1	1
NM_172856	Lass6	LAG1 homolog, ceramide synthase 6	1	0	0	1	1
NM_172858	Pak7	p21 (CDKN1A)-activated kinase 7	1	0	0	1	1
NM_172859	6330439K17Rik	RIKEN cDNA 6330439K17 gene	1	0	0	1	1
NM_172867	Zfp462	zinc finger protein 462	1	0	0	1	1
NM_172868	Palm2	paralemmin 2	1	0	0	1	1
NM_172880	Tmprss11e	transmembrane protease, serine 11e	1	0	0	1	1
NM_172882	Wdfy3	WD repeat and FYVE domain containing 3	1	0	0	1	1
NM_172883	Mfsd7	major facilitator superfamily domain containing 7	1	0	0	1	1
NM_172890	Slc6a11	solute carrier family 6 (neurotransmitter transporter, GABA), member 11	1	0	0	1	1
NM_172893	Parp12	poly (ADP-ribose) polymerase family, member 12	1	0	0	1	1
NM_172941	Zkscan17	zinc finger with KRAB and SCAN domains 17	1	0	0	1	1
NM_172961	Abat	4-aminobutyrate aminotransferase	1	0	0	1	1
NM_172992	Phtf2	putative homeodomain transcription factor 2	0	0	1	1	1
NM_172993	Zfp512	zinc finger protein 512	1	0	0	1	1
NM_173001	Jmjd1a	jumonji domain containing 1A	0	0	1	1	1
NM_173007	Tspan12	tetraspanin 12	0	0	1	1	1
NM_173012	Letm2	leucine zipper-EF-hand containing transmembrane protein 2	1	0	0	1	1
NM_173030	Galnt13	UDP-N-acetyl-alpha-D-galactosamine:polypeptide N-acetylgalactosaminyltransferase 13	1	0	0	1	1
NM_173033	BC057893	cDNA sequence BC057893	1	0	0	1	1
NM_173048	Gga3	golgi associated, gamma adaptin ear containing, ARF binding protein 3	1	0	0	1	1
NM_173186	Tbc1d24	TBC1 domain family, member 24	1	0	0	1	1
NM_173189	Mcph1	microcephaly, primary autosomal recessive 1	1	0	0	1	1
NM_173347	Prune	prune homolog (Drosophila)	1	0	0	1	1
NM_173364	Zfp445	zinc finger protein 445	1	0	0	1	1
NM_173370	Cds1	CDP-diacylglycerol synthase 1	1	0	0	1	1
NM_173382	2810046L04Rik	RIKEN cDNA 2810046L04 gene	1	0	0	1	1
NM_173388	Slc43a2	solute carrier family 43, member 2	1	0	0	1	1
NM_173396	Tgif2	TGFB-induced factor 2	0	0	1	1	1
NM_173413	Rab8b	RAB8B, member RAS oncogene family	1	0	0	1	1
NM_173415	Nyx	nyctalopin	1	0	0	1	1
NM_173429	Zfp775	zinc finger protein 775	1	0	0	1	1
NM_173431	Rpgrip1l	Rpgrip1-like	0	0	1	1	1
NM_173439	Fbxo45	F-box protein 45	1	0	0	1	1
NM_173731	Hmgcll1	3-hydroxymethyl-3-methylglutaryl-Coenzyme A lyase-like 1	1	0	0	1	1
NM_173733	Suox	sulfite oxidase	1	0	0	1	1
NM_173750	2700007P21Rik	RIKEN cDNA 2700007P21 gene	1	0	0	1	1
NM_173753	Fnip1	folliculin interacting protein 1	1	0	0	1	1
NM_173756	Lin52	lin-52 homolog (C. elegans)	1	0	0	1	1
NM_173772	Neu4	sialidase 4	1	0	0	1	1
NM_173778	4933412E14Rik	RIKEN cDNA 4933412E14 gene	1	0	0	1	1
NM_173868	St18	suppression of tumorigenicity 18	1	0	0	1	1
NM_174851	Il28ra	interleukin 28 receptor alpha	1	0	0	1	1
NM_174998	Hpcal4	hippocalcin-like 4	1	0	0	1	1
NM_175007	Amph	amphiphysin	1	0	0	1	1
NM_175009	Eny2	enhancer of yellow 2 homolog (Drosophila)	1	1	0	1	0
NM_175025	Atp2c1	ATPase, Ca++-sequestering	1	0	0	1	1
NM_175034	Slc24a5	solute carrier family 24, member 5	1	0	0	1	1
NM_175090	Slc31a1	solute carrier family 31, member 1	1	0	0	1	1
NM_175094	Pdhx	pyruvate dehydrogenase complex, component X	1	0	0	1	1
NM_175114	Trak1	trafficking protein, kinesin binding 1	1	0	0	1	1
NM_175115	Ikzf5	IKAROS family zinc finger 5	1	0	0	1	1
NM_175123	1110051M20Rik	RIKEN cDNA 1110051M20 gene	1	1	0	1	0
NM_175136	Rnf122	ring finger protein 122	1	0	0	1	1
NM_175155	Sash1	SAM and SH3 domain containing 1	1	0	0	1	1
NM_175175	Plekhf2	pleckstrin homology domain containing, family F (with FYVE domain) member 2	1	0	0	1	1
NM_175179	2810002O09Rik	RIKEN cDNA 2810002O09 gene	1	0	0	1	1
NM_175181	2600010E01Rik	RIKEN cDNA 2600010E01 gene	1	0	0	1	1
NM_175198	Prox2	prospero homeobox 2	1	0	0	1	1
NM_175213	4930486G11Rik	RIKEN cDNA 4930486G11 gene	1	0	0	1	1
NM_175219	C130026I21Rik	RIKEN cDNA C130026I21 gene	1	0	0	1	1
NM_175226	Rnf139	ring finger protein 139	0	0	1	1	1
NM_175255	Sec24a	SEC24 related gene family, member A (S. cerevisiae)	0	0	1	1	1
NM_175265	6720463M24Rik	RIKEN cDNA 6720463M24 gene	1	0	0	1	1
NM_175268	A930008G19Rik	RIKEN cDNA A930008G19 gene	1	0	0	1	1
NM_175272	Nav2	neuron navigator 2	1	0	0	1	1
NM_175310	Pds5b	PDS5, regulator of cohesion maintenance, homolog B (S. cerevisiae)	1	0	0	1	1
NM_175331	Nt5dc3	5"-nucleotidase domain containing 3	1	0	0	1	1
NM_175341	Mbnl2	muscleblind-like 2	1	0	1	1	0
NM_175363	Pphln1	periphilin 1	1	0	0	1	1
NM_175374	Mtrf1l	mitochondrial translational release factor 1-like	1	0	0	1	1
NM_175386	Lhfp	lipoma HMGIC fusion partner	1	0	0	1	1
NM_175389	Rg9mtd2	RNA (guanine-9-) methyltransferase domain containing 2	1	0	0	1	1
NM_175413	Lrrc39	leucine rich repeat containing 39	1	0	0	1	1
NM_175439	Mars2	methionine-tRNA synthetase 2 (mitochondrial)	1	0	0	1	1
NM_175456	Abra	actin-binding Rho activating protein	1	0	0	1	1
NM_175467	Sptlc3	serine palmitoyltransferase, long chain base subunit 3	1	0	0	1	1
NM_175489	Osbpl8	oxysterol binding protein-like 8	1	0	0	1	1
NM_175494	Zfp367	zinc finger protein 367	0	0	1	1	1
NM_175506	Adamts19	a disintegrin-like and metallopeptidase (reprolysin type) with thrombospondin type 1 motif, 19	1	0	0	1	1
NM_175511	A130092J06Rik	RIKEN cDNA A130092J06 gene	1	0	0	1	1
NM_175515	Intu	inturned planar cell polarity effector homolog (Drosophila)	1	0	0	1	1
NM_175532	Nlrp10	NLR family, pyrin domain containing 10	1	0	0	1	1
NM_175543	Rab11fip4	RAB11 family interacting protein 4 (class II)	1	0	0	1	1
NM_175551	Dido1	death inducer-obliterator 1	0	0	1	1	1
NM_175649	Tnfrsf26	tumor necrosis factor receptor superfamily, member 26	1	0	0	1	1
NM_175752	Chn1	chimerin (chimaerin) 1	1	0	0	1	1
NM_176808	Mcfd2	multiple coagulation factor deficiency 2	1	0	0	1	1
NM_176832	Spire1	spire homolog 1 (Drosophila)	1	0	0	1	1
NM_176836	2810485I05Rik	RIKEN cDNA 2810485I05 gene	0	0	1	1	1
NM_176923	Wdr59	WD repeat domain 59	1	0	0	1	1
NM_176957	E030049G20Rik	RIKEN cDNA E030049G20 gene	1	0	0	1	1
NM_176959	Fbxl7	F-box and leucine-rich repeat protein 7	1	0	0	1	1
NM_176993	Mpzl3	myelin protein zero-like 3	1	0	0	1	1
NM_177000	C130050O18Rik	RIKEN cDNA C130050O18 gene	1	0	0	1	1
NM_177034	Apba1	amyloid beta (A4) precursor protein binding, family A, member 1	1	0	0	1	1
NM_177073	Relt	RELT tumor necrosis factor receptor	1	0	0	1	1
NM_177075	C030019I05Rik	RIKEN cDNA C030019I05 gene	1	0	0	1	1
NM_177078	Adrbk2	adrenergic receptor kinase, beta 2	1	0	0	1	1
NM_177081	Ptpn7	protein tyrosine phosphatase, non-receptor type 7	1	0	0	1	1
NM_177089	Tacc1	transforming, acidic coiled-coil containing protein 1	1	0	0	1	1
NM_177092	Msrb3	methionine sulfoxide reductase B3	1	0	0	1	1
NM_177093	Lrrc58	leucine rich repeat containing 58	1	0	0	1	1
NM_177155	Klri2	killer cell lectin-like receptor family I member 2	1	0	0	1	1
NM_177190	Tcp11l1	t-complex 11 like 1	1	0	0	1	1
NM_177192	D030011O10Rik	RIKEN cDNA D030011O10 gene	1	0	0	1	1
NM_177215	Ocrl	oculocerebrorenal syndrome of Lowe	1	0	0	1	1
NM_177231	Arrb1	arrestin, beta 1	1	0	0	1	1
NM_177242	Pptc7	PTC7 protein phosphatase homolog (S. cerevisiae)	0	0	1	1	1
NM_177248	A630005I04Rik	RIKEN cDNA A630005I04 gene	1	0	0	1	1
NM_177260	Tmem154	transmembrane protein 154	1	0	0	1	1
NM_177265	6330512M04Rik	RIKEN cDNA 6330512M04 gene	1	0	0	1	1
NM_177267	Wdr22	WD repeat domain 22	1	0	0	1	1
NM_177270	Cdkl2	cyclin-dependent kinase-like 2 (CDC2-related kinase)	1	0	0	1	1
NM_177271	Samd5	sterile alpha motif domain containing 5	1	0	0	1	1
NM_177319	Zfyve27	zinc finger, FYVE domain containing 27	1	0	0	1	1
NM_177328	Grm7	glutamate receptor, metabotropic 7	1	0	0	1	1
NM_177343	Camk1d	calcium/calmodulin-dependent protein kinase ID	1	0	0	1	1
NM_177373	Ppfia2	protein tyrosine phosphatase, receptor type, f polypeptide (PTPRF), interacting protein (liprin), alpha 2	0	0	1	1	1
NM_177381	Cog3	component of oligomeric golgi complex 3	1	0	0	1	1
NM_177386	Sfmbt2	Scm-like with four mbt domains 2	1	0	0	1	1
NM_177393	Nalcn	sodium leak channel, non-selective	1	0	0	1	1
NM_177469	Gpr123	G protein-coupled receptor 123	1	0	0	1	1
NM_177578	A430090E18Rik	RIKEN cDNA A430090E18 gene	1	0	0	1	1
NM_177583	Aph1b	anterior pharynx defective 1b homolog (C. elegans)	1	0	0	1	1
NM_177586	Eif5a2	eukaryotic translation initiation factor 5A2	1	0	0	1	1
NM_177592	Tmem164	transmembrane protein 164	1	0	0	1	1
NM_177595	Mkx	mohawk	1	0	0	1	1
NM_177618	Wscd1	WSC domain containing 1	1	0	0	1	1
NM_177620	Rin3	Ras and Rab interactor 3	1	0	0	1	1
NM_177622	Zfp595	zin finger protein 595	1	0	0	1	1
NM_177628	BC065085	cDNA sequence BC065085	1	0	0	1	1
NM_177630	Ldoc1l	leucine zipper, down-regulated in cancer 1-like	1	0	0	1	1
NM_177645	1110028C15Rik	RIKEN cDNA 1110028C15 gene	1	0	0	1	1
NM_177678	Ablim2	actin-binding LIM protein 2	1	0	0	1	1
NM_177694	Tmem16e	transmembrane protein 16E	1	0	0	1	1
NM_177701	EG235327	predicted gene, EG235327	1	0	0	1	1
NM_177713	9830130M13Rik	RIKEN cDNA 9830130M13 gene	1	0	0	1	1
NM_177715	Kctd12	potassium channel tetramerisation domain containing 12	1	0	0	1	1
NM_177735	Tmem130	transmembrane protein 130	1	0	0	1	1
NM_177736	Lrrc61	leucine rich repeat containing 61	1	0	0	1	1
NM_177740	Rgma	RGM domain family, member A	1	0	0	1	1
NM_177762	Aak1	AP2 associated kinase 1	1	0	0	1	1
NM_177778	Armc7	armadillo repeat containing 7	1	0	0	1	1
NM_177814	Erc2	ELKS/RAB6-interacting/CAST family member 2	1	0	0	1	1
NM_177817	EG328479	predicted gene, EG328479	1	0	0	1	1
NM_177852	Dido1	death inducer-obliterator 1	1	0	0	1	1
NM_177857	Dennd2c	DENN/MADD domain containing 2C	1	0	0	1	1
NM_177887	BC022651	cDNA sequence BC022651	1	0	0	1	1
NM_177899	D330038O06Rik	RIKEN cDNA D330038O06 gene	1	0	0	1	1
NM_178045	Rassf4	Ras association (RalGDS/AF-6) domain family member 4	1	0	0	1	1
NM_178050	Arl6ip2	ADP-ribosylation factor-like 6 interacting protein 2	1	0	0	1	1
NM_178051	Mterfd2	MTERF domain containing 2	1	0	0	1	1
NM_178065	1110018G07Rik	RIKEN cDNA 1110018G07 gene	1	0	0	1	1
NM_178076	Mcf2l	mcf.2 transforming sequence-like	0	0	1	1	1
NM_178149	Pik3ip1	phosphoinositide-3-kinase interacting protein 1	1	0	0	1	1
NM_178194	Hist1h2be	histone cluster 1, H2be	1	0	0	1	1
NM_178220	Arrb1	arrestin, beta 1	1	0	0	1	1
NM_178267	Zfp827	zinc finger protein 827	1	0	0	1	1
NM_178357	Klf11	Kruppel-like factor 11	1	0	0	1	1
NM_178363	Ylpm1	YLP motif containing 1	0	0	1	1	1
NM_178371	Slc9a8	solute carrier family 9 (sodium/hydrogen exchanger), member 8	1	0	0	1	1
NM_178392	Snapc1	small nuclear RNA activating complex, polypeptide 1	1	0	0	1	1
NM_178397	Ubxd8	UBX domain containing 8	1	0	0	1	1
NM_178421	Nanos1	nanos homolog 1 (Drosophila)	0	0	1	1	1
NM_178604	Txnl4a	thioredoxin-like 4A	1	0	0	1	1
NM_178617	Necab1	N-terminal EF-hand calcium binding protein 1	1	0	0	1	1
NM_178624	Fbxl2	F-box and leucine-rich repeat protein 2	1	0	0	1	1
NM_178627	Poldip3	polymerase (DNA-directed), delta interacting protein 3	1	0	0	1	1
NM_178640	B3galnt2	UDP-GalNAc:betaGlcNAc beta 1,3-galactosaminyltransferase, polypeptide 2	1	0	0	1	1
NM_178646	Tigd5	tigger transposable element derived 5	1	0	0	1	1
NM_178667	Tfdp2	transcription factor Dp 2	1	0	0	1	1
NM_178670	8030462N17Rik	RIKEN cDNA 8030462N17 gene	1	0	0	1	1
NM_178681	Dgkb	diacylglycerol kinase, beta	1	0	0	1	1
NM_178682	4933426M11Rik	RIKEN cDNA 4933426M11 gene	1	0	0	1	1
NM_178684	Mapk1ip1l	mitogen-activated protein kinase 1 interacting protein 1-like	1	0	0	1	1
NM_178700	Grsf1	G-rich RNA sequence binding factor 1	1	0	0	1	1
NM_178714	Lrfn5	leucine rich repeat and fibronectin type III domain containing 5	1	0	0	1	1
NM_178716	Tnpo1	transportin 1	1	0	0	1	1
NM_178719	Smcr7l	Smith-Magenis syndrome chromosome region, candidate 7-like (human)	1	0	0	1	1
NM_178723	Zfp385b	zinc finger protein 385B	0	1	1	1	0
NM_178736	Elmod2	ELMO domain containing 2	1	0	0	1	1
NM_178754	Arhgap6	Rho GTPase activating protein 6	1	0	0	1	1
NM_178755	Agbl2	ATP/GTP binding protein-like 2	1	0	0	1	1
NM_178764	B930006L02Rik	RIKEN cDNA B930006L02 gene	0	0	1	1	1
NM_178774	Prr18	proline rich region 18	1	0	0	1	1
NM_178778	A930041I02Rik	RIKEN cDNA A930041I02 gene	1	0	0	1	1
NM_178794	Zrsr2	zinc finger (CCCH type), RNA binding motif and serine/arginine rich 2	1	0	0	1	1
NM_178797	Far2	fatty acyl CoA reductase 2	1	0	0	1	1
NM_178801	6030446N20Rik	RIKEN cDNA 6030446N20 gene	1	0	0	1	1
NM_178880	Son	Son cell proliferation protein	0	0	1	1	1
NM_178888	Garnl3	GTPase activating RANGAP domain-like 3	1	0	0	1	1
NM_178890	Abtb2	ankyrin repeat and BTB (POZ) domain containing 2	0	0	1	1	1
NM_178915	Tmem179	transmembrane protein 179	1	0	0	1	1
NM_178920	Mal2	mal, T-cell differentiation protein 2	1	0	0	1	1
NM_178922	Hic2	hypermethylated in cancer 2	1	0	0	1	1
NM_181070	Rab18	RAB18, member RAS oncogene family	1	0	0	1	1
NM_181072	Myo1e	myosin IE	0	0	1	1	1
NM_181278	B230219D22Rik	RIKEN cDNA B230219D22 gene	1	0	0	1	1
NM_181344	C1rl	complement component 1, r subcomponent-like	1	0	0	1	1
NM_181400	Wdr47	WD repeat domain 47	1	0	0	1	1
NM_181417	Csrp2bp	cysteine and glycine-rich protein 2 binding protein	1	0	0	1	1
NM_181529	Syt15	synaptotagmin XV	1	0	0	1	1
NM_181579	Pof1b	premature ovarian failure 1B	1	0	0	1	1
NM_181595	Ppp1r9a	protein phosphatase 1, regulatory (inhibitor) subunit 9A	1	0	0	1	1
NM_181730	Rpo1-3	RNA polymerase 1-3	1	0	0	1	1
NM_181734	5830472M02Rik	RIKEN cDNA 5830472M02 gene	1	0	0	1	1
NM_181853	Trim66	tripartite motif-containing 66	1	0	0	1	1
NM_182782	Klhl25	kelch-like 25 (Drosophila)	1	0	0	1	1
NM_182808	C630007B19Rik	RIKEN cDNA C630007B19 gene	1	0	0	1	1
NM_182927	Spred3	sprouty-related, EVH1 domain containing 3	1	0	0	1	1
NM_182939	Ppp4r2	protein phosphatase 4, regulatory subunit 2	1	0	0	1	1
NM_182993	Slc17a7	solute carrier family 17 (sodium-dependent inorganic phosphate cotransporter), member 7	1	0	0	1	1
NM_182994	Arl5a	ADP-ribosylation factor-like 5A	1	0	0	1	1
NM_183146	A530054K11Rik	RIKEN cDNA A530054K11 gene	1	0	0	1	1
NM_183162	BC006779	cDNA sequence BC006779	1	0	0	1	1
NM_183174	Homez	homeodomain leucine zipper-encoding gene	1	0	0	1	1
NM_183180	Tspan18	tetraspanin 18	1	0	0	1	1
NM_183193	Foxi2	forkhead box I2	1	0	0	1	1
NM_183221	Fat4	FAT tumor suppressor homolog 4 (Drosophila)	0	0	1	1	1
NM_183261	Nr2f2	nuclear receptor subfamily 2, group F, member 2	1	0	0	1	1
NM_183308	Pon2	paraoxonase 2	1	0	0	1	1
NM_183318	Rgag4	retrotransposon gag domain containing 4	1	0	0	1	1
NM_184053	Calu	calumenin	1	0	0	1	1
NM_194064	Nanos2	nanos homolog 2 (Drosophila)	1	0	0	1	1
NM_194262	Arid4b	AT rich interactive domain 4B (Rbp1 like)	0	0	1	1	1
NM_194268	Onecut2	one cut domain, family member 2	1	0	0	1	1
NM_194336	Mpa2l	macrophage activation 2 like	1	0	0	1	1
NM_194355	Spire1	spire homolog 1 (Drosophila)	1	0	0	1	1
NM_194462	Akap9	A kinase (PRKA) anchor protein (yotiao) 9	1	0	0	1	1
NM_197940	Wipf2	WAS/WASL interacting protein family, member 2	1	0	0	1	1
NM_197959	3000004C01Rik	RIKEN cDNA 3000004C01 gene	1	0	0	1	1
NM_197985	Adipor2	adiponectin receptor 2	1	0	0	1	1
NM_198029	Fermt1	fermitin family homolog 1 (Drosophila)	1	0	0	1	1
NM_198033	Setx	senataxin	1	0	0	1	1
NM_198090	Hnrnpa3	heterogeneous nuclear ribonucleoprotein A3	1	0	0	1	1
NM_198100	Tbkbp1	TBK1 binding protein 1	1	0	0	1	1
NM_198103	Exoc8	exocyst complex component 8	1	0	0	1	1
NM_198105	ORF34	open reading frame 34	1	0	0	1	1
NM_198111	Akap6	A kinase (PRKA) anchor protein 6	1	0	0	1	1
NM_198122	Arid4b	AT rich interactive domain 4B (Rbp1 like)	0	0	1	1	1
NM_198190	Ntf5	neurotrophin 5	1	0	0	1	1
NM_198292	Tex2	testis expressed gene 2	1	0	0	1	1
NM_198294	Tanc1	tetratricopeptide repeat, ankyrin repeat and coiled-coil containing 1	0	0	1	1	1
NM_198295	Txndc10	thioredoxin domain containing 10	1	0	0	1	1
NM_198304	Nup188	nucleoporin 188	1	0	0	1	1
NM_198416	Zzz3	zinc finger, ZZ domain containing 3	1	0	0	1	1
NM_198419	Phactr1	phosphatase and actin regulator 1	1	0	0	1	1
NM_198607	4930572J05Rik	RIKEN cDNA 4930572J05 gene	1	0	0	1	1
NM_198616	Ccdc85b	coiled-coil domain containing 85B	1	0	0	1	1
NM_198626	AI480653	expressed sequence AI480653	1	0	0	1	1
NM_198860	AI646023	expressed sequence AI646023	1	0	0	1	1
NM_198862	Nlgn2	neuroligin 2	1	0	0	1	1
NM_199025	Zbtb26	zinc finger and BTB domain containing 26	1	0	0	1	1
NM_199143	Znrf2	zinc and ring finger 2	0	0	1	1	1
NM_199299	Phf15	PHD finger protein 15	1	0	0	1	1
NM_199323	Tacc1	transforming, acidic coiled-coil containing protein 1	1	0	0	1	1
NM_199468	Zcchc5	zinc finger, CCHC domain containing 5	1	0	0	1	1
NM_201226	Lrrc47	leucine rich repeat containing 47	1	0	0	1	1
NM_201352	Gdpd5	glycerophosphodiester phosphodiesterase domain containing 5	1	0	0	1	1
NM_201610	Neil2	nei like 2 (E. coli)	1	0	0	1	1
NM_203507	Rwdd4a	RWD domain containing 4A	1	0	0	1	1
NM_205810	Mrgprb1	MAS-related GPR, member B1	1	0	0	1	1
NM_205823	Tlr12	toll-like receptor 12	1	0	0	1	1
NM_207214	Exoc5	exocyst complex component 5	1	0	0	1	1
NM_207238	Fbxo27	F-box protein 27	1	0	0	1	1
NM_207633	Yipf6	Yip1 domain family, member 6	1	0	0	1	1
NM_207636	Fndc3a	fibronectin type III domain containing 3a	0	0	1	1	1
NM_207668	Acpp	acid phosphatase, prostate	1	0	0	1	1
NM_207680	Bcl2l11	BCL2-like 11 (apoptosis facilitator)	1	0	0	1	1
NM_207681	Bcl2l11	BCL2-like 11 (apoptosis facilitator)	1	0	0	1	1
NM_212435	Foxp2	forkhead box P2	1	0	0	1	1
NM_212449	AU019823	expressed sequence AU019823	1	0	0	1	1
NM_212473	A930008G19Rik	RIKEN cDNA A930008G19 gene	1	0	0	1	1
NM_213727	9430069J07Rik	RIKEN cDNA 9430069J07 gene	1	0	0	1	1
XM_001000101	Tnks2	tankyrase, TRF1-interacting ankyrin-related ADP-ribose polymerase 2	1	1	0	0	1
XM_001001798	Gm22	gene model 22, (NCBI)	1	1	0	0	1
XM_001002157	Akap11	A kinase (PRKA) anchor protein 11	1	1	0	0	1
XM_111398	Gm22	gene model 22, (NCBI)	1	1	0	0	1
XM_134422	Papd5	PAP associated domain containing 5	1	1	0	0	1
XM_486794	OTTMUSG00000018988	predicted gene, OTTMUSG00000018988	1	1	0	0	1
XM_621045	Prrg1	proline rich Gla (G-carboxyglutamic acid) 1	1	1	0	0	1
XM_888689	OTTMUSG00000005702	predicted gene, OTTMUSG00000005702	1	1	0	0	1
XM_891442	Hnrnpa0	heterogeneous nuclear ribonucleoprotein A0	1	1	0	0	1
XM_896986	A430041B07Rik	RIKEN cDNA A430041B07 gene	1	1	0	0	1
XM_897991	OTTMUSG00000018988	predicted gene, OTTMUSG00000018988	1	1	0	0	1
XM_904306	Zfp746	zinc finger protein 746	1	1	0	0	1
XM_907680	H2afv	H2A histone family, member V	1	1	0	0	1
XM_915278	Akap11	A kinase (PRKA) anchor protein 11	1	1	0	0	1
XM_915280	EG639025	predicted gene, EG639025	1	1	0	0	1
XM_917270	Tnks2	tankyrase, TRF1-interacting ankyrin-related ADP-ribose polymerase 2	1	1	0	0	1
XM_921217	Prrg1	proline rich Gla (G-carboxyglutamic acid) 1	1	1	0	0	1
XM_921499	LOC633467	similar to Tripartite motif protein 6	1	1	0	0	1
XM_922411	Nova1	neuro-oncological ventral antigen 1	1	1	0	0	1
XM_922989	A430041B07Rik	RIKEN cDNA A430041B07 gene	1	1	0	0	1
XM_923034	A430041B07Rik	RIKEN cDNA A430041B07 gene	1	1	0	0	1
XM_982169	OTTMUSG00000018964	predicted gene, OTTMUSG00000018964	1	1	0	0	1
XM_986261	EG639025	predicted gene, EG639025	1	1	0	0	1
XM_989004	Papd5	PAP associated domain containing 5	1	1	0	0	1

## Sheet: miR-151-5p
# "1" : interaction predicted; "0" : interaction not predicted.
Refseq	Symbol	Description	miranda	mirtarget2	pictar	pita	rnahybrid
NM_007434	Akt2	thymoma viral proto-oncogene 2	1	1	0	1	1
NM_016663	Syt3	synaptotagmin III	1	1	0	1	1
NM_019453	Mefv	Mediterranean fever	1	1	0	1	1
NM_019880	Mtch1	mitochondrial carrier homolog 1 (C. elegans)	1	1	0	1	1
NM_019994	Garnl1	GTPase activating RANGAP domain-like 1	1	1	0	1	1
NM_025708	Tmem186	transmembrane protein 186	1	1	0	1	1
NM_029609	2310007H09Rik	RIKEN cDNA 2310007H09 gene	1	1	0	1	1
NM_146104	Aph1a	anterior pharynx defective 1a homolog (C. elegans)	1	1	0	1	1
NM_175460	Nmnat2	nicotinamide nucleotide adenylyltransferase 2	1	1	0	1	1
NM_176835	2810451A06Rik	RIKEN cDNA 2810451A06 gene	1	1	0	1	1
NM_001001495	Tnip3	TNFAIP3 interacting protein 3	1	0	0	1	1
NM_001001985	Nat8l	N-acetyltransferase 8-like	1	0	0	1	1
NM_001002764	Smg6	Smg-6 homolog, nonsense mediated mRNA decay factor (C. elegans)	1	0	0	1	1
NM_001002896	Bfsp2	beaded filament structural protein 2, phakinin	1	0	0	1	1
NM_001003898	Tardbp	TAR DNA binding protein	1	0	0	1	1
NM_001003899	Tardbp	TAR DNA binding protein	1	0	0	1	1
NM_001003911	Adamts7	a disintegrin-like and metallopeptidase (reprolysin type) with thrombospondin type 1 motif, 7	1	0	0	1	1
NM_001004139	Zfp619	zinc finger protein 619	1	0	0	1	1
NM_001004148	Slc13a5	solute carrier family 13 (sodium-dependent citrate transporter), member 5	1	0	0	1	1
NM_001004164	Gnptab	N-acetylglucosamine-1-phosphate transferase, alpha and beta subunits	1	0	0	1	1
NM_001004177	Celsr2	cadherin, EGF LAG seven-pass G-type receptor 2 (flamingo homolog, Drosophila)	1	0	0	1	1
NM_001008231	Daam2	dishevelled associated activator of morphogenesis 2	1	0	0	1	1
NM_001008424	Cdsn	corneodesmosin	1	0	0	1	1
NM_001008545	Tardbp	TAR DNA binding protein	1	0	0	1	1
NM_001008546	Tardbp	TAR DNA binding protein	1	0	0	1	1
NM_001008550	Zfyve26	zinc finger, FYVE domain containing 26	1	0	0	1	1
NM_001012477	Cxcl12	chemokine (C-X-C motif) ligand 12	1	0	0	1	1
NM_001012517	Fut10	fucosyltransferase 10	1	0	0	1	1
NM_001013374	Lman2l	lectin, mannose-binding 2-like	1	0	0	1	1
NM_001013386	Rasl10b	RAS-like, family 10, member B	1	0	0	1	1
NM_001013390	Scn4b	sodium channel, type IV, beta	1	0	0	1	1
NM_001013767	Capn11	calpain 11	1	0	0	1	1
NM_001013777	Zfp488	zinc finger protein 488	1	0	0	1	1
NM_001013792	BC087945	cDNA sequence BC087945	1	0	0	1	1
NM_001013811	EG434197	predicted gene, EG434197	1	0	0	1	1
NM_001014761	Scn2b	sodium channel, voltage-gated, type II, beta	1	0	0	1	1
NM_001017427	Rasef	RAS and EF hand domain containing	1	0	0	1	1
NM_001017968	Zdhhc18	zinc finger, DHHC domain containing 18	1	0	0	1	1
NM_001024139	Adamts15	a disintegrin-like and metallopeptidase (reprolysin type) with thrombospondin type 1 motif, 15	1	0	0	1	1
NM_001024727	EG545952	predicted gene, EG545952	1	0	0	1	1
NM_001024927	Pitpnm3	PITPNM family member 3	1	0	0	1	1
NM_001024955	Pik3r1	phosphatidylinositol 3-kinase, regulatory subunit, polypeptide 1 (p85 alpha)	1	0	0	1	1
NM_001025372	Adcyap1r1	adenylate cyclase activating polypeptide 1 receptor 1	1	0	0	1	1
NM_001025381	Gpr17	G protein-coupled receptor 17	1	0	0	1	1
NM_001025571	Sh2d2a	SH2 domain protein 2A	1	0	0	1	1
NM_001025581	Kcnc2	potassium voltage gated channel, Shaw-related subfamily, member 2	1	0	0	1	1
NM_001025590	Kcnj6	potassium inwardly-rectifying channel, subfamily J, member 6	1	0	0	1	1
NM_001025599	Trim26	tripartite motif-containing 26	1	0	0	1	1
NM_001025612	Snx22	sorting nexin 22	1	0	0	1	1
NM_001026214	Entpd5	ectonucleoside triphosphate diphosphohydrolase 5	1	0	0	1	1
NM_001029843	Vrk1	vaccinia related kinase 1	1	0	0	1	1
NM_001029844	Vrk1	vaccinia related kinase 1	1	0	0	1	1
NM_001029936	Specc1	sperm antigen with calponin homology and coiled-coil domains 1	1	0	0	1	1
NM_001029982	Sec23ip	Sec23 interacting protein	1	0	0	1	1
NM_001029983	Man1b1	mannosidase, alpha, class 1B, member 1	1	0	0	1	1
NM_001030310	H2-Tw3	similar to histocompatibility 2, T region locus 3	1	0	0	1	1
NM_001032378	Pecam1	platelet/endothelial cell adhesion molecule 1	1	0	0	1	1
NM_001032727	5730410E15Rik	RIKEN cDNA 5730410E15 gene	1	0	0	1	1
NM_001033128	Bbs1	Bardet-Biedl syndrome 1 homolog (human)	1	0	0	1	1
NM_001033134	2610002J02Rik	RIKEN cDNA 2610002J02 gene	1	0	0	1	1
NM_001033196	Znfx1	zinc finger, NFX1-type containing 1	1	0	0	1	1
NM_001033221	AU023871	expressed sequence AU023871	1	0	0	1	1
NM_001033261	Ccdc131	coiled-coil domain containing 131	1	0	0	1	1
NM_001033275	Glt8d3	glycosyltransferase 8 domain containing 3	1	0	0	1	1
NM_001033284	BC026585	cDNA sequence BC026585	1	0	0	1	1
NM_001033331	Gas2l3	growth arrest-specific 2 like 3	1	0	0	1	1
NM_001033352	Klhl21	kelch-like 21 (Drosophila)	1	0	0	1	1
NM_001033389	Fubp3	far upstream element (FUSE) binding protein 3	1	0	0	1	1
NM_001033432	Heca	headcase homolog (Drosophila)	1	0	0	1	1
NM_001033475	Tmed8	transmembrane emp24 domain containing 8	1	0	0	1	1
NM_001033713	Mef2a	myocyte enhancer factor 2A	1	0	0	1	1
NM_001033759	Tmem2	transmembrane protein 2	1	0	0	1	1
NM_001033877	Adamts17	a disintegrin-like and metallopeptidase (reprolysin type) with thrombospondin type 1 motif, 17	1	0	0	1	1
NM_001034874	Gm879	gene model 879, (NCBI)	1	0	0	1	1
NM_001035228	St3gal5	ST3 beta-galactoside alpha-2,3-sialyltransferase 5	1	0	0	1	1
NM_001035854	Ap2b1	adaptor-related protein complex 2, beta 1 subunit	1	0	0	1	1
NM_001037757	ORF19	open reading frame 19	1	0	0	1	1
NM_001037758	Btrc	beta-transducin repeat containing protein	1	0	0	1	1
NM_001037822	Krtap5-5	keratin associated protein 5-5	1	0	0	1	1
NM_001037929	OTTMUSG00000015643	predicted gene, OTTMUSG00000015643	1	0	0	1	1
NM_001037935	EG629678	predicted gene, EG629678	1	0	0	1	1
NM_001037957	Dyrk1b	dual-specificity tyrosine-(Y)-phosphorylation regulated kinase 1b	1	0	0	1	1
NM_001037997	Fert2	fer (fms/fps related) protein kinase, testis specific 2	1	0	0	1	1
NM_001038609	Mapt	microtubule-associated protein tau	1	0	0	1	1
NM_001038619	Dnm3	dynamin 3	1	0	0	1	1
NM_001038635	Stk35	serine/threonine kinase 35	1	0	0	1	1
NM_001038710	Tmod2	tropomodulin 2	1	0	0	1	1
NM_001038993	Rnf38	ring finger protein 38	1	0	0	1	1
NM_001039000	Kif5a	kinesin family member 5A	1	0	0	1	1
NM_001039038	F430201B04Rik	RIKEN cDNA F430201B04 gene	1	0	0	1	1
NM_001039050	Pkib	protein kinase inhibitor beta, cAMP dependent, testis specific	1	0	0	1	1
NM_001039051	Pkib	protein kinase inhibitor beta, cAMP dependent, testis specific	1	0	0	1	1
NM_001039052	Pkib	protein kinase inhibitor beta, cAMP dependent, testis specific	1	0	0	1	1
NM_001039126	Asb1	ankyrin repeat and SOCS box-containing protein 1	1	0	0	1	1
NM_001039138	Camk2g	calcium/calmodulin-dependent protein kinase II gamma	1	0	0	1	1
NM_001039139	Camk2g	calcium/calmodulin-dependent protein kinase II gamma	1	0	0	1	1
NM_001039234	Nlrp1c	NLR family, pyrin domain containing 1C	1	0	0	1	1
NM_001039351	Nolc1	nucleolar and coiled-body phosphoprotein 1	1	0	0	1	1
NM_001039352	Nolc1	nucleolar and coiled-body phosphoprotein 1	1	0	0	1	1
NM_001039353	Nolc1	nucleolar and coiled-body phosphoprotein 1	1	0	0	1	1
NM_001039364	Mobp	myelin-associated oligodendrocytic basic protein	1	0	0	1	1
NM_001039389	Wdr37	WD repeat domain 37	1	0	0	1	1
NM_001039472	Kif21b	kinesin family member 21B	1	0	0	1	1
NM_001039483	Tmco1	transmembrane and coiled-coil domains 1	1	0	0	1	1
NM_001039520	Dnm2	dynamin 2	1	0	0	1	1
NM_001039537	Lif	leukemia inhibitory factor	1	0	0	1	1
NM_001039677	Slc30a2	solute carrier family 30 (zinc transporter), member 2	1	0	0	1	1
NM_001039878	Strn4	striatin, calmodulin binding protein 4	1	0	0	1	1
NM_001040106	Aak1	AP2 associated kinase 1	1	0	0	1	1
NM_001040682	Clmn	calmin	1	0	0	1	1
NM_001040689	Rspo4	R-spondin family, member 4	1	0	0	1	1
NM_001042489	Hvcn1	hydrogen voltage-gated channel 1	1	0	0	1	1
NM_001042659	Fzd5	frizzled homolog 5 (Drosophila)	1	0	0	1	1
NM_001042710	Prssl1	protease, serine-like 1	1	0	0	1	1
NM_001042725	Calcr	calcitonin receptor	1	0	0	1	1
NM_001044308	Cacna1i	calcium channel, voltage-dependent, alpha 1I subunit	1	0	0	1	1
NM_001044740	Slc7a2	solute carrier family 7 (cationic amino acid transporter, y+ system), member 2	1	0	0	1	1
NM_001045514	Akna	AT-hook transcription factor	1	0	0	1	1
NM_001047433	Dph3	DPH3 homolog (KTI11, S. cerevisiae)	1	0	0	1	1
NM_001048060	5133401N09Rik	RIKEN cDNA 5133401N09 gene	1	0	0	1	1
NM_001048143	Mon1b	MON1 homolog b (yeast)	1	0	0	1	1
NM_001048167	Mtap6	microtubule-associated protein 6	1	0	0	1	1
NM_001076681	1810012P15Rik	RIKEN cDNA 1810012P15 gene	1	0	0	1	1
NM_001077190	Abi1	abl-interactor 1	1	0	0	1	1
NM_001077192	Abi1	abl-interactor 1	1	0	0	1	1
NM_001077193	Abi1	abl-interactor 1	1	0	0	1	1
NM_001077361	Fhl1	four and a half LIM domains 1	1	0	0	1	1
NM_001077362	Fhl1	four and a half LIM domains 1	1	0	0	1	1
NM_001077403	Nrp2	neuropilin 2	1	0	0	1	1
NM_001077404	Nrp2	neuropilin 2	1	0	0	1	1
NM_001077405	Nrp2	neuropilin 2	1	0	0	1	1
NM_001077406	Nrp2	neuropilin 2	1	0	0	1	1
NM_001077407	Nrp2	neuropilin 2	1	0	0	1	1
NM_001077495	Pik3r1	phosphatidylinositol 3-kinase, regulatory subunit, polypeptide 1 (p85 alpha)	1	0	0	1	1
NM_001079873	Brdt	bromodomain, testis-specific	1	0	0	1	1
NM_001079876	Gas2l3	growth arrest-specific 2 like 3	1	0	0	1	1
NM_001079883	Bcl11b	B-cell leukemia/lymphoma 11B	1	0	0	1	1
NM_001079908	Fgfr1	fibroblast growth factor receptor 1	1	0	0	1	1
NM_001079909	Fgfr1	fibroblast growth factor receptor 1	1	0	0	1	1
NM_001080769	Uhrf1bp1	UHRF1 (ICBP90) binding protein 1	1	0	0	1	1
NM_001080798	Aff1	AF4/FMR2 family, member 1	1	0	0	1	1
NM_001080924	Znrf3	zinc and ring finger 3	1	0	0	1	1
NM_001080927	Rbpj	recombination signal binding protein for immunoglobulin kappa J region	1	0	0	1	1
NM_001080928	Rbpj	recombination signal binding protein for immunoglobulin kappa J region	1	0	0	1	1
NM_001080930	Atxn1l	ataxin 1-like	1	0	0	1	1
NM_001080979	Tead4	TEA domain family member 4	1	0	0	1	1
NM_001081006	Etl4	enhancer trap locus 4	1	0	0	1	1
NM_001081017	9030205A07Rik	RIKEN cDNA 9030205A07 Gene	1	0	0	1	1
NM_001081022	D430042O09Rik	RIKEN cDNA D430042O09 gene	1	0	0	1	1
NM_001081035	Nav3	neuron navigator 3	1	0	0	1	1
NM_001081049	Mll1	myeloid/lymphoid or mixed-lineage leukemia 1	1	0	0	1	1
NM_001081066	Dennd3	DENN/MADD domain containing 3	1	0	0	1	1
NM_001081071	Lycat	lysocardiolipin acyltransferase	1	0	0	1	1
NM_001081109	Lmtk2	lemur tyrosine kinase 2	1	0	0	1	1
NM_001081134	Kcng1	potassium voltage-gated channel, subfamily G, member 1	1	0	0	1	1
NM_001081135	Prrg3	proline rich Gla (G-carboxyglutamic acid) 3 (transmembrane)	1	0	0	1	1
NM_001081147	Oxtr	oxytocin receptor	1	0	0	1	1
NM_001081160	Mdga1	MAM domain containing glycosylphosphatidylinositol anchor 1	1	0	0	1	1
NM_001081169	A530050D06Rik	RIKEN cDNA A530050D06 gene	1	0	0	1	1
NM_001081175	Itpkb	inositol 1,4,5-trisphosphate 3-kinase B	1	0	0	1	1
NM_001081211	Ptafr	platelet-activating factor receptor	1	0	0	1	1
NM_001081217	Zfp174	zinc finger protein 174	1	0	0	1	1
NM_001081225	6030443O07Rik	RIKEN cDNA 6030443O07 gene	1	0	0	1	1
NM_001081235	Mn1	meningioma 1	1	0	0	1	1
NM_001081236	2410131K14Rik	RIKEN cDNA 2410131K14 gene	1	0	0	1	1
NM_001081242	Tln2	talin 2	1	0	0	1	1
NM_001081247	Polr3a	polymerase (RNA) III (DNA directed) polypeptide A	1	0	0	1	1
NM_001081252	Ugcgl2	UDP-glucose ceramide glucosyltransferase-like 2	1	0	0	1	1
NM_001081255	Lrch3	leucine-rich repeats and calponin homology (CH) domain containing 3	1	0	0	1	1
NM_001081269	Whsc1l1	Wolf-Hirschhorn syndrome candidate 1-like 1 (human)	1	0	0	1	1
NM_001081279	Mfhas1	malignant fibrous histiocytoma amplified sequence 1	1	0	0	1	1
NM_001081342	Gpr133	G protein-coupled receptor 133	1	0	0	1	1
NM_001081373	Cep164	centrosomal protein 164	1	0	0	1	1
NM_001081395	Amotl1	angiomotin-like 1	1	0	0	1	1
NM_001081403	Klhl14	kelch-like 14 (Drosophila)	1	0	0	1	1
NM_001081420	BC026590	cDNA sequence BC026590	1	0	0	1	1
NM_001081426	Dip2c	DIP2 disco-interacting protein 2 homolog C (Drosophila)	1	0	0	1	1
NM_001081453	Nin	ninein	1	0	0	1	1
NM_001081457	Ppp2r5c	protein phosphatase 2, regulatory subunit B (B56), gamma isoform	1	0	0	1	1
NM_001081635	Ccnd3	cyclin D3	1	0	0	1	1
NM_001081636	Ccnd3	cyclin D3	1	0	0	1	1
NM_001081641	Pitpnm3	PITPNM family member 3	1	0	0	1	1
NM_001081963	9430020K01Rik	RIKEN cDNA 9430020K01 gene	1	0	0	1	1
NM_001081977	Rnf144a	ring finger protein 144A	1	0	0	1	1
NM_001081979	Mecp2	methyl CpG binding protein 2	1	0	0	1	1
NM_001082483	Efr3b	EFR3 homolog B (S. cerevisiae)	1	0	0	1	1
NM_001083316	Pdgfra	platelet derived growth factor receptor, alpha polypeptide	1	0	0	1	1
NM_001083919	Xirp2	xin actin-binding repeat containing 2	1	0	0	1	1
NM_001083937	Slc35a2	solute carrier family 35 (UDP-galactose transporter), member A2	1	0	0	1	1
NM_001085409	Steap3	STEAP family member 3	1	0	0	1	1
NM_001085448	Ctnnd1	catenin (cadherin associated protein), delta 1	1	0	0	1	1
NM_001085449	Ctnnd1	catenin (cadherin associated protein), delta 1	1	0	0	1	1
NM_001085450	Ctnnd1	catenin (cadherin associated protein), delta 1	1	0	0	1	1
NM_001085453	Ctnnd1	catenin (cadherin associated protein), delta 1	1	0	0	1	1
NM_001085501	Ppp1r3d	protein phosphatase 1, regulatory subunit 3D	1	0	0	1	1
NM_001085507	Zbtb34	zinc finger and BTB domain containing 34	1	0	0	1	1
NM_001085515	AI464131	expressed sequence AI464131	1	0	0	1	1
NM_001085521	OTTMUSG00000015750	predicted gene, OTTMUSG00000015750	1	0	0	1	1
NM_001098225	Adam22	a disintegrin and metallopeptidase domain 22	1	0	0	1	1
NM_007407	Adcyap1r1	adenylate cyclase activating polypeptide 1 receptor 1	1	0	0	1	1
NM_007514	Slc7a2	solute carrier family 7 (cationic amino acid transporter, y+ system), member 2	1	0	0	1	1
NM_007537	Bcl2l2	Bcl2-like 2	1	0	0	1	1
NM_007582	Cacng1	calcium channel, voltage-dependent, gamma subunit 1	1	0	0	1	1
NM_007598	Cap1	CAP, adenylate cyclase-associated protein 1 (yeast)	1	0	0	1	1
NM_007615	Ctnnd1	catenin (cadherin associated protein), delta 1	1	0	0	1	1
NM_007647	Entpd5	ectonucleoside triphosphate diphosphohydrolase 5	1	0	0	1	1
NM_007721	Ccr10	chemokine (C-C motif) receptor 10	1	0	0	1	1
NM_007914	Ehf	ets homologous factor	1	0	0	1	1
NM_007929	Emp2	epithelial membrane protein 2	1	0	0	1	1
NM_007958	Smarcad1	SWI/SNF-related, matrix-associated actin-dependent regulator of chromatin, subfamily a, containing DEAD/H box 1	1	0	0	1	1
NM_007988	Fasn	fatty acid synthase	1	0	0	1	1
NM_008056	Fzd6	frizzled homolog 6 (Drosophila)	1	0	0	1	1
NM_008178	Gsx1	GS homeobox 1	1	0	0	1	1
NM_008251	Hmgn1	high mobility group nucleosomal binding domain 1	1	0	0	1	1
NM_008258	Hn1	hematological and neurological expressed sequence 1	1	0	0	1	1
NM_008275	Hoxd13	homeo box D13	1	0	0	1	1
NM_008313	Htr4	5 hydroxytryptamine (serotonin) receptor 4	1	0	0	1	1
NM_008441	Kif1b	kinesin family member 1B	1	0	0	1	1
NM_008501	Lif	leukemia inhibitory factor	1	0	0	1	1
NM_008541	Smad5	MAD homolog 5 (Drosophila)	1	0	0	1	1
NM_008596	Sypl2	synaptophysin-like 2	1	0	0	1	1
NM_008599	Cxcl9	chemokine (C-X-C motif) ligand 9	1	0	0	1	1
NM_008636	Mtf1	metal response element binding transcription factor 1	1	0	0	1	1
NM_008739	Nsd1	nuclear receptor-binding SET-domain protein 1	1	0	0	1	1
NM_008765	Orc2l	origin recognition complex, subunit 2-like (S. cerevisiae)	1	0	0	1	1
NM_008775	Pafah1b2	platelet-activating factor acetylhydrolase, isoform 1b, alpha2 subunit	1	0	0	1	1
NM_008794	Pcsk7	proprotein convertase subtilisin/kexin type 7	1	0	0	1	1
NM_008797	Pcx	pyruvate carboxylase	1	0	0	1	1
NM_008800	Pde1b	phosphodiesterase 1B, Ca2+-calmodulin dependent	1	0	0	1	1
NM_008802	Pde7a	phosphodiesterase 7A	1	0	0	1	1
NM_008816	Pecam1	platelet/endothelial cell adhesion molecule 1	1	0	0	1	1
NM_008829	Pgr	progesterone receptor	1	0	0	1	1
NM_008855	Prkcb1	protein kinase C, beta 1	1	0	0	1	1
NM_008859	Prkcq	protein kinase C, theta	1	0	0	1	1
NM_008863	Pkib	protein kinase inhibitor beta, cAMP dependent, testis specific	1	0	0	1	1
NM_008882	Plxna2	plexin A2	1	0	0	1	1
NM_008888	Phox2b	paired-like homeobox 2b	1	0	0	1	1
NM_008891	Pnn	pinin	1	0	0	1	1
NM_008910	Ppm1a	protein phosphatase 1A, magnesium dependent, alpha isoform	1	0	0	1	1
NM_008924	Prkar2a	protein kinase, cAMP dependent regulatory, type II alpha	1	0	0	1	1
NM_008974	Ptp4a2	protein tyrosine phosphatase 4a2	1	0	0	1	1
NM_008976	Ptpn14	protein tyrosine phosphatase, non-receptor type 14	1	0	0	1	1
NM_008997	Rab11b	RAB11B, member RAS oncogene family	1	0	0	1	1
NM_009024	Rara	retinoic acid receptor, alpha	1	0	0	1	1
NM_009035	Rbpj	recombination signal binding protein for immunoglobulin kappa J region	1	0	0	1	1
NM_009037	Rcn1	reticulocalbin 1	1	0	0	1	1
NM_009053	Rfng	RFNG O-fucosylpeptide 3-beta-N-acetylglucosaminyltransferase	1	0	0	1	1
NM_009069	Rit1	Ras-like without CAAX 1	1	0	0	1	1
NM_009108	Nr1h4	nuclear receptor subfamily 1, group H, member 4	1	0	0	1	1
NM_009137	Ccl22	chemokine (C-C motif) ligand 22	1	0	0	1	1
NM_009156	Sepw1	selenoprotein W, muscle 1	1	0	0	1	1
NM_009157	Map2k4	mitogen-activated protein kinase kinase 4	1	0	0	1	1
NM_009171	Shmt1	serine hydroxymethyltransferase 1 (soluble)	1	0	0	1	1
NM_009181	St8sia2	ST8 alpha-N-acetyl-neuraminide alpha-2,8-sialyltransferase 2	1	0	0	1	1
NM_009182	St8sia3	ST8 alpha-N-acetyl-neuraminide alpha-2,8-sialyltransferase 3	1	0	0	1	1
NM_009185	Stil	Scl/Tal1 interrupting locus	1	0	0	1	1
NM_009223	Snn	stannin	1	0	0	1	1
NM_009228	Snta1	syntrophin, acidic 1	1	0	0	1	1
NM_009234	Sox11	SRY-box containing gene 11	1	0	0	1	1
NM_009259	Spn	sialophorin	1	0	0	1	1
NM_009307	Syt2	synaptotagmin II	1	0	0	1	1
NM_009327	Hnf1a	HNF1 homeobox A	1	0	0	1	1
NM_009333	Tcf7l2	transcription factor 7-like 2, T-cell specific, HMG-box	1	0	0	1	1
NM_009368	Tgfb3	transforming growth factor, beta 3	1	0	0	1	1
NM_009379	Thpo	thrombopoietin	1	0	0	1	1
NM_009396	Tnfaip2	tumor necrosis factor, alpha-induced protein 2	1	0	0	1	1
NM_009416	Tpm2	tropomyosin 2, beta	1	0	0	1	1
NM_009443	Tgoln1	trans-golgi network protein	1	0	0	1	1
NM_009459	Ube2h	ubiquitin-conjugating enzyme E2H	1	0	0	1	1
NM_009476	Upk2	uroplakin 2	1	0	0	1	1
NM_009486	Vmn2r89	vomeronasal 2, receptor 89	1	0	0	1	1
NM_009487	Vmn2r89	vomeronasal 2, receptor 89	1	0	0	1	1
NM_009507	Vhl	von Hippel-Lindau syndrome	1	0	0	1	1
NM_009510	Ezr	ezrin	1	0	0	1	1
NM_009517	Zmat3	zinc finger matrin type 3	1	0	0	1	1
NM_009536	Ywhae	tyrosine 3-monooxygenase/tryptophan 5-monooxygenase activation protein, epsilon polypeptide	1	0	0	1	1
NM_009549	Zfp185	zinc finger protein 185	1	0	0	1	1
NM_009557	Zfp46	zinc finger protein 46	1	0	0	1	1
NM_009593	Abcg1	ATP-binding cassette, sub-family G (WHITE), member 1	1	0	0	1	1
NM_009594	Abl1	c-abl oncogene 1, receptor tyrosine kinase	1	0	0	1	1
NM_009595	Abl2	v-abl Abelson murine leukemia viral oncogene homolog 2 (arg, Abelson-related gene)	1	0	0	1	1
NM_009602	Chrnb2	cholinergic receptor, nicotinic, beta polypeptide 2 (neuronal)	1	0	0	1	1
NM_009622	Adcy1	adenylate cyclase 1	1	0	0	1	1
NM_009633	Adra2b	adrenergic receptor, alpha 2b	1	0	0	1	1
NM_009644	Ahrr	aryl-hydrocarbon receptor repressor	1	0	0	1	1
NM_009647	Ak3l1	adenylate kinase 3-like 1	1	0	0	1	1
NM_009677	Ap1g1	adaptor protein complex AP-1, gamma 1 subunit	1	0	0	1	1
NM_009680	Ap3b1	adaptor-related protein complex 3, beta 1 subunit	1	0	0	1	1
NM_009690	Cd5l	CD5 antigen-like	1	0	0	1	1
NM_009719	Neurog3	neurogenin 3	1	0	0	1	1
NM_009730	Atrn	attractin	1	0	0	1	1
NM_009739	Bckdk	branched chain ketoacid dehydrogenase kinase	1	0	0	1	1
NM_009782	Cacna1e	calcium channel, voltage-dependent, R type, alpha 1E subunit	1	0	0	1	1
NM_009802	Car6	carbonic anhydrase 6	1	0	0	1	1
NM_009805	Cflar	CASP8 and FADD-like apoptosis regulator	1	0	0	1	1
NM_009806	Cask	calcium/calmodulin-dependent serine protein kinase (MAGUK family)	1	0	0	1	1
NM_009829	Ccnd2	cyclin D2	1	0	0	1	1
NM_009843	Ctla4	cytotoxic T-lymphocyte-associated protein 4	1	0	0	1	1
NM_009868	Cdh5	cadherin 5	1	0	0	1	1
NM_009876	Cdkn1c	cyclin-dependent kinase inhibitor 1C (P57)	1	0	0	1	1
NM_009954	Bcar1	breast cancer anti-estrogen resistance 1	1	0	0	1	1
NM_010050	Dio2	deiodinase, iodothyronine, type II	1	0	0	1	1
NM_010065	Dnm1	dynamin 1	1	0	0	1	1
NM_010071	Dok2	docking protein 2	1	0	0	1	1
NM_010086	Adam24	a disintegrin and metallopeptidase domain 24 (testase 1)	1	0	0	1	1
NM_010099	Eda	ectodysplasin-A	1	0	0	1	1
NM_010109	Efna5	ephrin A5	1	0	0	1	1
NM_010112	Efs	embryonal Fyn-associated substrate	1	0	0	1	1
NM_010133	En1	engrailed 1	1	0	0	1	1
NM_010147	Epn1	epsin 1	1	0	0	1	1
NM_010195	Lgr5	leucine rich repeat containing G protein coupled receptor 5	1	0	0	1	1
NM_010197	Fgf1	fibroblast growth factor 1	1	0	0	1	1
NM_010206	Fgfr1	fibroblast growth factor receptor 1	1	0	0	1	1
NM_010211	Fhl1	four and a half LIM domains 1	1	0	0	1	1
NM_010216	Figf	c-fos induced growth factor	1	0	0	1	1
NM_010220	Fkbp5	FK506 binding protein 5	1	0	0	1	1
NM_010228	Flt1	FMS-like tyrosine kinase 1	1	0	0	1	1
NM_010243	Fut9	fucosyltransferase 9	1	0	0	1	1
NM_010275	Gdnf	glial cell line derived neurotrophic factor	1	0	0	1	1
NM_010299	Gm2a	GM2 ganglioside activator protein	1	0	0	1	1
NM_010303	Gna13	guanine nucleotide binding protein, alpha 13	1	0	0	1	1
NM_010306	Gnai3	guanine nucleotide binding protein (G protein), alpha inhibiting 3	1	0	0	1	1
NM_010325	Got2	glutamate oxaloacetate transaminase 2, mitochondrial	1	0	0	1	1
NM_010389	H2-Ob	histocompatibility 2, O region beta locus	1	0	0	1	1
NM_010390	H2-Q1	histocompatibility 2, Q region locus 1	1	0	0	1	1
NM_010513	Igf1r	insulin-like growth factor I receptor	1	0	0	1	1
NM_010518	Igfbp5	insulin-like growth factor binding protein 5	1	0	0	1	1
NM_010570	Irs1	insulin receptor substrate 1	1	0	0	1	1
NM_010587	Itsn1	intersectin 1 (SH3 domain protein 1A)	1	0	0	1	1
NM_010598	Kcnab2	potassium voltage-gated channel, shaker-related subfamily, beta member 2	1	0	0	1	1
NM_010605	Kcnj5	potassium inwardly-rectifying channel, subfamily J, member 5	1	0	0	1	1
NM_010688	Lasp1	LIM and SH3 protein 1	1	0	0	1	1
NM_010716	Lig3	ligase III, DNA, ATP-dependent	1	0	0	1	1
NM_010717	Limk1	LIM-domain containing, protein kinase	1	0	0	1	1
NM_010776	Mbl2	mannose binding lectin (C)	1	0	0	1	1
NM_010788	Mecp2	methyl CpG binding protein 2	1	0	0	1	1
NM_010797	Mid1	midline 1	1	0	0	1	1
NM_010806	Mllt4	myeloid/lymphoid or mixed-lineage leukemia (trithorax homolog, Drosophila); translocated to, 4	1	0	0	1	1
NM_010827	Msc	musculin	1	0	0	1	1
NM_010838	Mapt	microtubule-associated protein tau	1	0	0	1	1
NM_010851	Myd88	myeloid differentiation primary response gene 88	1	0	0	1	1
NM_010875	Ncam1	neural cell adhesion molecule 1	1	0	0	1	1
NM_010901	Nfatc3	nuclear factor of activated T-cells, cytoplasmic, calcineurin-dependent 3	1	0	0	1	1
NM_010923	Nnat	neuronatin	1	0	0	1	1
NM_010926	Cox4nb	COX4 neighbor	1	0	0	1	1
NM_010939	Nrp2	neuropilin 2	1	0	0	1	1
NM_010952	Oaz2	ornithine decarboxylase antizyme 2	1	0	0	1	1
NM_011020	Hspa4l	heat shock protein 4 like	1	0	0	1	1
NM_011023	Otx1	orthodenticle homolog 1 (Drosophila)	1	0	0	1	1
NM_011039	Pax7	paired box gene 7	1	0	0	1	1
NM_011058	Pdgfra	platelet derived growth factor receptor, alpha polypeptide	1	0	0	1	1
NM_011062	Pdpk1	3-phosphoinositide dependent protein kinase-1	1	0	0	1	1
NM_011081	Piga	phosphatidylinositol glycan anchor biosynthesis, class A	1	0	0	1	1
NM_011086	Pip5k3	phosphatidylinositol-3-phosphate/phosphatidylinositol 5-kinase, type III	1	0	0	1	1
NM_011097	Pitx1	paired-like homeodomain transcription factor 1	1	0	0	1	1
NM_011100	Prkacb	protein kinase, cAMP dependent, catalytic, beta	1	0	0	1	1
NM_011109	Pla2g2d	phospholipase A2, group IID	1	0	0	1	1
NM_011112	Papola	poly (A) polymerase alpha	1	0	0	1	1
NM_011138	Pou2f2	POU domain, class 2, transcription factor 2	1	0	0	1	1
NM_011139	Pou2f3	POU domain, class 2, transcription factor 3	1	0	0	1	1
NM_011192	Psme3	proteaseome (prosome, macropain) 28 subunit, 3	1	0	0	1	1
NM_011201	Ptpn1	protein tyrosine phosphatase, non-receptor type 1	1	0	0	1	1
NM_011216	Ptpro	protein tyrosine phosphatase, receptor type, O	1	0	0	1	1
NM_011235	Rad51l3	RAD51-like 3 (S. cerevisiae)	1	0	0	1	1
NM_011261	Reln	reelin	1	0	0	1	1
NM_011267	Rgs16	regulator of G-protein signaling 16	1	0	0	1	1
NM_011276	Rnf12	ring finger protein 12	1	0	0	1	1
NM_011302	Rs1	retinoschisis (X-linked, juvenile) 1 (human)	1	0	0	1	1
NM_011305	Rxra	retinoid X receptor alpha	1	0	0	1	1
NM_011346	Sell	selectin, lymphocyte	1	0	0	1	1
NM_011348	Sema3e	sema domain, immunoglobulin domain (Ig), short basic domain, secreted, (semaphorin) 3E	1	0	0	1	1
NM_011350	Sema4f	sema domain, immunoglobulin domain (Ig), TM domain, and short cytoplasmic domain	1	0	0	1	1
NM_011352	Sema7a	sema domain, immunoglobulin domain (Ig), and GPI membrane anchor, (semaphorin) 7A	1	0	0	1	1
NM_011366	Sorbs3	sorbin and SH3 domain containing 3	1	0	0	1	1
NM_011375	St3gal5	ST3 beta-galactoside alpha-2,3-sialyltransferase 5	1	0	0	1	1
NM_011382	Six4	sine oculis-related homeobox 4 homolog (Drosophila)	1	0	0	1	1
NM_011385	Ski	ski sarcoma viral oncogene homolog (avian)	1	0	0	1	1
NM_011403	Slc4a1	solute carrier family 4 (anion exchanger), member 1	1	0	0	1	1
NM_011406	Slc8a1	solute carrier family 8 (sodium/calcium exchanger), member 1	1	0	0	1	1
NM_011420	Smn1	survival motor neuron 1	1	0	0	1	1
NM_011438	Sox12	SRY-box containing gene 12	1	0	0	1	1
NM_011462	Spin1	spindlin 1	1	0	0	1	1
NM_011467	Spr	sepiapterin reductase	1	0	0	1	1
NM_011481	Srms	src-related kinase lacking C-terminal regulatory tyrosine and N-terminal myristylation sites	1	0	0	1	1
NM_011489	Stat5b	signal transducer and activator of transcription 5B	1	0	0	1	1
NM_011519	Sdc1	syndecan 1	1	0	0	1	1
NM_011567	Tead4	TEA domain family member 4	1	0	0	1	1
NM_011603	Tbpl1	TATA box binding protein-like 1	1	0	0	1	1
NM_011607	Tnc	tenascin C	1	0	0	1	1
NM_011627	Tpbg	trophoblast glycoprotein	1	0	0	1	1
NM_011669	Usp12	ubiquitin specific peptidase 12	1	0	0	1	1
NM_011681	Scgb1a1	secretoglobin, family 1A, member 1 (uteroglobin)	1	0	0	1	1
NM_011705	Vrk1	vaccinia related kinase 1	1	0	0	1	1
NM_011711	Fmnl3	formin-like 3	1	0	0	1	1
NM_011719	Wnt9b	wingless-type MMTV integration site 9B	1	0	0	1	1
NM_011723	Xdh	xanthine dehydrogenase	1	0	0	1	1
NM_011752	Zfp259	zinc finger protein 259	1	0	0	1	1
NM_011772	Ikzf4	IKAROS family zinc finger 4	1	0	0	1	1
NM_011778	Coro1b	coronin, actin binding protein 1B	1	0	0	1	1
NM_011779	Coro1c	coronin, actin binding protein 1C	1	0	0	1	1
NM_011785	Akt3	thymoma viral proto-oncogene 3	1	0	0	1	1
NM_011790	Arih2	ariadne homolog 2 (Drosophila)	1	0	0	1	1
NM_011814	Fxr2	fragile X mental retardation, autosomal homolog 2	1	0	0	1	1
NM_011820	Ggt5	gamma-glutamyltransferase 5	1	0	0	1	1
NM_011828	Hs2st1	heparan sulfate 2-O-sulfotransferase 1	1	0	0	1	1
NM_011829	Impdh1	inosine 5"-phosphate dehydrogenase 1	1	0	0	1	1
NM_011845	Mid2	midline 2	1	0	0	1	1
NM_011884	Rngtt	RNA guanylyltransferase and 5"-phosphatase	1	0	0	1	1
NM_011889	2014-09-03	septin 3	1	0	0	1	1
NM_011919	Ing1	inhibitor of growth family, member 1	1	0	0	1	1
NM_011930	Clcn7	chloride channel 7	1	0	0	1	1
NM_011934	Esrrb	estrogen related receptor, beta	1	0	0	1	1
NM_011937	Gnpda1	glucosamine-6-phosphate deaminase 1	1	0	0	1	1
NM_011948	Map3k4	mitogen-activated protein kinase kinase kinase 4	1	0	0	1	1
NM_011951	Mapk14	mitogen-activated protein kinase 14	1	0	0	1	1
NM_011960	Parg	poly (ADP-ribose) glycohydrolase	1	0	0	1	1
NM_011973	Rage	renal tumor antigen	1	0	0	1	1
NM_011989	Slc27a4	solute carrier family 27 (fatty acid transporter), member 4	1	0	0	1	1
NM_011990	Slc7a11	solute carrier family 7 (cationic amino acid transporter, y+ system), member 11	1	0	0	1	1
NM_012023	Ppp2r5c	protein phosphatase 2, regulatory subunit B (B56), gamma isoform	1	0	0	1	1
NM_012032	Serinc3	serine incorporator 3	1	0	0	1	1
NM_013467	Aldh1a1	aldehyde dehydrogenase family 1, subfamily A1	1	0	0	1	1
NM_013495	Cpt1a	carnitine palmitoyltransferase 1a, liver	1	0	0	1	1
NM_013502	Ctbp1	C-terminal binding protein 1	1	0	0	1	1
NM_013508	Elk3	ELK3, member of ETS oncogene family	1	0	0	1	1
NM_013568	Kcna6	potassium voltage-gated channel, shaker-related, subfamily, member 6	1	0	0	1	1
NM_013623	Orm3	orosomucoid 3	1	0	0	1	1
NM_013661	Sema5b	sema domain, seven thrombospondin repeats (type 1 and type 1-like), transmembrane domain (TM) and short cytoplasmic domain, (semaphorin) 5B	1	0	0	1	1
NM_013672	Sp1	trans-acting transcription factor 1	1	0	0	1	1
NM_013675	Spnb1	spectrin beta 1	1	0	0	1	1
NM_013688	Tcte1	t-complex-associated testis expressed 1	1	0	0	1	1
NM_013692	Klf10	Kruppel-like factor 10	1	0	0	1	1
NM_013723	Podxl	podocalyxin-like	1	0	0	1	1
NM_013770	Slc25a10	solute carrier family 25 (mitochondrial carrier, dicarboxylate transporter), member 10	1	0	0	1	1
NM_013823	Kl	klotho	1	0	0	1	1
NM_013851	Abca8b	ATP-binding cassette, sub-family A (ABC1), member 8b	1	0	0	1	1
NM_013861	Tpk1	thiamine pyrophosphokinase	1	0	0	1	1
NM_013885	Clic4	chloride intracellular channel 4 (mitochondrial)	1	0	0	1	1
NM_013886	Hdgfrp3	hepatoma-derived growth factor, related protein 3	1	0	0	1	1
NM_013924	Abt1	activator of basal transcription 1	1	0	0	1	1
NM_015773	Spag6	sperm associated antigen 6	1	0	0	1	1
NM_015786	Hist1h1c	histone cluster 1, H1c	1	0	0	1	1
NM_015790	Icosl	icos ligand	1	0	0	1	1
NM_015802	Dlc1	deleted in liver cancer 1	1	0	0	1	1
NM_015805	Atp9b	ATPase, class II, type 9B	1	0	0	1	1
NM_015818	Hs6st1	heparan sulfate 6-O-sulfotransferase 1	1	0	0	1	1
NM_015827	Copb2	coatomer protein complex, subunit beta 2 (beta prime)	1	0	0	1	1
NM_015829	Slc25a13	solute carrier family 25 (mitochondrial carrier, adenine nucleotide translocator), member 13	1	0	0	1	1
NM_016662	Mxd3	Max dimerization protein 3	1	0	0	1	1
NM_016695	Mpp2	membrane protein, palmitoylated 2 (MAGUK p55 subfamily member 2)	1	0	0	1	1
NM_016711	Tmod2	tropomodulin 2	1	0	0	1	1
NM_016716	Cul3	cullin 3	1	0	0	1	1
NM_016720	Neu3	neuraminidase 3	1	0	0	1	1
NM_016748	Ctps	cytidine 5"-triphosphate synthase	1	0	0	1	1
NM_016751	Clec4f	C-type lectin domain family 4, member f	1	0	0	1	1
NM_016769	Smad3	MAD homolog 3 (Drosophila)	1	0	0	1	1
NM_016781	Prkag1	protein kinase, AMP-activated, gamma 1 non-catalytic subunit	1	0	0	1	1
NM_016791	Nfatc1	nuclear factor of activated T-cells, cytoplasmic, calcineurin-dependent 1	1	0	0	1	1
NM_016808	Usp2	ubiquitin specific peptidase 2	1	0	0	1	1
NM_016810	Gosr1	golgi SNAP receptor complex member 1	1	0	0	1	1
NM_016856	Cpsf2	cleavage and polyadenylation specific factor 2	1	0	0	1	1
NM_016882	Sart1	squamous cell carcinoma antigen recognized by T-cells 1	1	0	0	1	1
NM_016895	Ak2	adenylate kinase 2	1	0	0	1	1
NM_016896	Map3k14	mitogen-activated protein kinase kinase kinase 14	1	0	0	1	1
NM_016903	Esd	esterase D/formylglutathione hydrolase	1	0	0	1	1
NM_016916	Blcap	bladder cancer associated protein homolog (human)	1	0	0	1	1
NM_016919	Col5a3	collagen, type V, alpha 3	1	0	0	1	1
NM_016920	Atp6v0a1	ATPase, H+ transporting, lysosomal V0 subunit A1	1	0	0	1	1
NM_016925	Fanca	Fanconi anemia, complementation group A	1	0	0	1	1
NM_016981	Slc9a1	solute carrier family 9 (sodium/hydrogen exchanger), member 1	1	0	0	1	1
NM_017376	Tef	thyrotroph embryonic factor	1	0	0	1	1
NM_017381	Zranb2	zinc finger, RAN-binding domain containing 2	1	0	0	1	1
NM_017392	Celsr2	cadherin, EGF LAG seven-pass G-type receptor 2 (flamingo homolog, Drosophila)	1	0	0	1	1
NM_017402	Arhgef7	Rho guanine nucleotide exchange factor (GEF7)	1	0	0	1	1
NM_017475	Rragc	Ras-related GTP binding C	1	0	0	1	1
NM_018742	Bet1l	blocked early in transport 1 homolog (S. cerevisiae)-like	1	0	0	1	1
NM_018744	Sema6a	sema domain, transmembrane domain (TM), and cytoplasmic domain, (semaphorin) 6A	1	0	0	1	1
NM_018760	Slc4a4	solute carrier family 4 (anion exchanger), member 4	1	0	0	1	1
NM_018776	Crlf3	cytokine receptor-like factor 3	1	0	0	1	1
NM_018804	Syt11	synaptotagmin XI	1	0	0	1	1
NM_018865	Wisp1	WNT1 inducible signaling pathway protein 1	1	0	0	1	1
NM_018872	Tmem131	transmembrane protein 131	1	0	0	1	1
NM_018885	Irx4	Iroquois related homeobox 4 (Drosophila)	1	0	0	1	1
NM_018887	Cyp39a1	cytochrome P450, family 39, subfamily a, polypeptide 1	1	0	0	1	1
NM_019388	Cd86	CD86 antigen	1	0	0	1	1
NM_019419	Arl6ip1	ADP-ribosylation factor-like 6 interacting protein 1	1	0	0	1	1
NM_019423	Elovl2	elongation of very long chain fatty acids (FEN1/Elo2, SUR4/Elo3, yeast)-like 2	1	0	0	1	1
NM_019465	Crtam	cytotoxic and regulatory T cell molecule	1	0	0	1	1
NM_019479	Hes6	hairy and enhancer of split 6 (Drosophila)	1	0	0	1	1
NM_019518	Grasp	GRP1 (general receptor for phosphoinositides 1)-associated scaffold protein	1	0	0	1	1
NM_019552	Abcb10	ATP-binding cassette, sub-family B (MDR/TAP), member 10	1	0	0	1	1
NM_019572	Hdac7	histone deacetylase 7	1	0	0	1	1
NM_019573	Wwox	WW domain-containing oxidoreductase	1	0	0	1	1
NM_019649	Clptm1	cleft lip and palate associated transmembrane protein 1	1	0	0	1	1
NM_019654	Socs5	suppressor of cytokine signaling 5	1	0	0	1	1
NM_019681	Freq	frequenin homolog (Drosophila)	1	0	0	1	1
NM_019691	Gria4	glutamate receptor, ionotropic, AMPA4 (alpha 4)	1	0	0	1	1
NM_019715	Kcmf1	potassium channel modulatory factor 1	1	0	0	1	1
NM_019742	Tusc2	tumor suppressor candidate 2	1	0	0	1	1
NM_019777	Ikbke	inhibitor of kappaB kinase epsilon	1	0	0	1	1
NM_019781	Pex14	peroxisomal biogenesis factor 14	1	0	0	1	1
NM_019788	Pldn	pallidin	1	0	0	1	1
NM_019806	Vapb	vesicle-associated membrane protein, associated protein B and C	1	0	0	1	1
NM_019811	Acss2	acyl-CoA synthetase short-chain family member 2	1	0	0	1	1
NM_019821	Gltp	glycolipid transfer protein	1	0	0	1	1
NM_019861	Ctsf	cathepsin F	1	0	0	1	1
NM_019867	Ngef	neuronal guanine nucleotide exchange factor	1	0	0	1	1
NM_019959	C1qtnf1	C1q and tumor necrosis factor related protein 1	1	0	0	1	1
NM_019969	Plag1	pleiomorphic adenoma gene 1	1	0	0	1	1
NM_019980	Litaf	LPS-induced TN factor	1	0	0	1	1
NM_020006	Cdc42ep4	CDC42 effector protein (Rho GTPase binding) 4	1	0	0	1	1
NM_020270	Scamp5	secretory carrier membrane protein 5	1	0	0	1	1
NM_020275	Tnfrsf10b	tumor necrosis factor receptor superfamily, member 10b	1	0	0	1	1
NM_020293	Cldn9	claudin 9	1	0	0	1	1
NM_020333	Slc12a5	solute carrier family 12, member 5	1	0	0	1	1
NM_020497	Zfp276	zinc finger protein (C2H2 type) 276	1	0	0	1	1
NM_020579	B4galt3	UDP-Gal:betaGlcNAc beta 1,4-galactosyltransferase, polypeptide 3	1	0	0	1	1
NM_020606	Parva	parvin, alpha	1	0	0	1	1
NM_021279	Wnt1	wingless-related MMTV integration site 1	1	0	0	1	1
NM_021288	Tyms	thymidylate synthase	1	0	0	1	1
NM_021295	Lancl1	LanC (bacterial lantibiotic synthetase component C)-like 1	1	0	0	1	1
NM_021296	Grpel2	GrpE-like 2, mitochondrial	1	0	0	1	1
NM_021344	Tesc	tescalcin	1	0	0	1	1
NM_021371	Caln1	calneuron 1	1	0	0	1	1
NM_021395	Hyou1	hypoxia up-regulated 1	1	0	0	1	1
NM_021399	Bcl11b	B-cell leukemia/lymphoma 11B	1	0	0	1	1
NM_021433	Stx6	syntaxin 6	1	0	0	1	1
NM_021435	Slc35b4	solute carrier family 35, member B4	1	0	0	1	1
NM_021449	Crbn	cereblon	1	0	0	1	1
NM_021462	Mknk2	MAP kinase-interacting serine/threonine kinase 2	1	0	0	1	1
NM_021488	Ghrl	ghrelin	1	0	0	1	1
NM_021489	F12	coagulation factor XII (Hageman factor)	1	0	0	1	1
NM_021513	Thap11	THAP domain containing 11	1	0	0	1	1
NM_021523	Huwe1	HECT, UBA and WWE domain containing 1	1	0	0	1	1
NM_021530	Slc4a8	solute carrier family 4 (anion exchanger), member 8	1	0	0	1	1
NM_021534	Pxmp4	peroxisomal membrane protein 4	1	0	0	1	1
NM_021537	Stk25	serine/threonine kinase 25 (yeast)	1	0	0	1	1
NM_021539	Wsb2	WD repeat and SOCS box-containing 2	1	0	0	1	1
NM_021557	Rdh11	retinol dehydrogenase 11	1	0	0	1	1
NM_021704	Cxcl12	chemokine (C-X-C motif) ligand 12	1	0	0	1	1
NM_021886	Cenph	centromere protein H	1	0	0	1	1
NM_021890	Fads3	fatty acid desaturase 3	1	0	0	1	1
NM_021899	Foxj2	forkhead box J2	1	0	0	1	1
NM_022009	Flii	flightless I homolog (Drosophila)	1	0	0	1	1
NM_022017	Trpv4	transient receptor potential cation channel, subfamily V, member 4	1	0	0	1	1
NM_022023	Gmfb	glia maturation factor, beta	1	0	0	1	1
NM_022026	Aqp9	aquaporin 9	1	0	0	1	1
NM_022411	Slc13a2	solute carrier family 13 (sodium-dependent dicarboxylate transporter), member 2	1	0	0	1	1
NM_022424	Fndc4	fibronectin type III domain containing 4	1	0	0	1	1
NM_022435	Sp5	trans-acting transcription factor 5	1	0	0	1	1
NM_022653	Thop1	thimet oligopeptidase 1	1	0	0	1	1
NM_022721	Fzd5	frizzled homolog 5 (Drosophila)	1	0	0	1	1
NM_022723	Scube1	signal peptide, CUB domain, EGF-like 1	1	0	0	1	1
NM_022882	Lpin2	lipin 2	1	0	0	1	1
NM_023045	Xpo7	exportin 7	1	0	0	1	1
NM_023046	Asb1	ankyrin repeat and SOCS box-containing protein 1	1	0	0	1	1
NM_023053	Twsg1	twisted gastrulation homolog 1 (Drosophila)	1	0	0	1	1
NM_023162	Znrd1	zinc ribbon domain containing, 1	1	0	0	1	1
NM_023290	Mkrn2	makorin, ring finger protein, 2	1	0	0	1	1
NM_023314	Eif4e2	eukaryotic translation initiation factor 4E member 2	1	0	0	1	1
NM_023396	Rprm	reprimo, TP53 dependent G2 arrest mediator candidate	1	0	0	1	1
NM_023403	Mesdc2	mesoderm development candidate 2	1	0	0	1	1
NM_023409	Npc2	Niemann Pick type C2	1	0	0	1	1
NM_023420	Col4a3bp	collagen, type IV, alpha 3 (Goodpasture antigen) binding protein	1	0	0	1	1
NM_023537	Rab3b	RAB3B, member RAS oncogene family	1	0	0	1	1
NM_023543	Chn2	chimerin (chimaerin) 2	1	0	0	1	1
NM_023635	Rab27a	RAB27A, member RAS oncogene family	1	0	0	1	1
NM_023668	Ndel1	nuclear distribution gene E-like homolog 1 (A. nidulans)	1	0	0	1	1
NM_023854	Arfgap2	ADP-ribosylation factor GTPase activating protein 2	1	0	0	1	1
NM_024174	Mrps23	mitochondrial ribosomal protein S23	1	0	0	1	1
NM_024215	Zfp593	zinc finger protein 593	1	0	0	1	1
NM_024289	Osbpl5	oxysterol binding protein-like 5	1	0	0	1	1
NM_024290	Tnfrsf23	tumor necrosis factor receptor superfamily, member 23	1	0	0	1	1
NM_024433	Mtap	methylthioadenosine phosphorylase	1	0	0	1	1
NM_024436	Rab22a	RAB22A, member RAS oncogene family	1	0	0	1	1
NM_024452	Luzp1	leucine zipper protein 1	1	0	0	1	1
NM_025287	Spop	speckle-type POZ protein	1	0	0	1	1
NM_025294	Gtlf3b	gene trap locus F3b	1	0	0	1	1
NM_025301	Mrpl17	mitochondrial ribosomal protein L17	1	0	0	1	1
NM_025412	Pycrl	pyrroline-5-carboxylate reductase-like	1	0	0	1	1
NM_025429	Serpinb1a	serine (or cysteine) peptidase inhibitor, clade B, member 1a	1	0	0	1	1
NM_025439	Tmem9	transmembrane protein 9	1	0	0	1	1
NM_025445	Arfgap3	ADP-ribosylation factor GTPase activating protein 3	1	0	0	1	1
NM_025454	Ing5	inhibitor of growth family, member 5	1	0	0	1	1
NM_025476	2410005O16Rik	RIKEN cDNA 2410005O16 gene	1	0	0	1	1
NM_025558	Cyb5b	cytochrome b5 type B	1	0	0	1	1
NM_025588	Exoc2	exocyst complex component 2	1	0	0	1	1
NM_025590	Acot11	acyl-CoA thioesterase 11	1	0	0	1	1
NM_025610	Asrgl1	asparaginase like 1	1	0	0	1	1
NM_025670	5730403B10Rik	RIKEN cDNA 5730403B10 gene	1	0	0	1	1
NM_025675	Atpbd4	ATP binding domain 4	1	0	0	1	1
NM_025693	Tmem41a	transmembrane protein 41a	1	0	0	1	1
NM_025717	Rbm4b	RNA binding motif protein 4B	1	0	0	1	1
NM_025781	Tmem170	transmembrane protein 170	1	0	0	1	1
NM_025807	Slc16a9	solute carrier family 16 (monocarboxylic acid transporters), member 9	1	0	0	1	1
NM_025828	Lman2	lectin, mannose-binding 2	1	0	0	1	1
NM_025834	Proz	protein Z, vitamin K-dependent plasma glycoprotein	1	0	0	1	1
NM_025841	Kdelr2	KDEL (Lys-Asp-Glu-Leu) endoplasmic reticulum protein retention receptor 2	1	0	0	1	1
NM_025848	Sdhd	succinate dehydrogenase complex, subunit D, integral membrane protein	1	0	0	1	1
NM_025857	2310007F21Rik	RIKEN cDNA 2310007F21 gene	1	0	0	1	1
NM_025873	Trit1	tRNA isopentenyltransferase 1	1	0	0	1	1
NM_025937	Nkap	NFKB activating protein	1	0	0	1	1
NM_025945	Polr3d	polymerase (RNA) III (DNA directed) polypeptide D	1	0	0	1	1
NM_025959	Psmc6	proteasome (prosome, macropain) 26S subunit, ATPase, 6	1	0	0	1	1
NM_025978	Ttc14	tetratricopeptide repeat domain 14	1	0	0	1	1
NM_025994	Efhd2	EF hand domain containing 2	1	0	0	1	1
NM_025996	Tomm34	translocase of outer mitochondrial membrane 34	1	0	0	1	1
NM_026048	2810452K22Rik	RIKEN cDNA 2810452K22 gene	1	0	0	1	1
NM_026137	Wdr13	WD repeat domain 13	1	0	0	1	1
NM_026154	Mrpl10	mitochondrial ribosomal protein L10	1	0	0	1	1
NM_026168	Ergic2	ERGIC and golgi 2	1	0	0	1	1
NM_026177	1200011I18Rik	RIKEN cDNA 1200011I18 gene	1	0	0	1	1
NM_026184	Ero1lb	ERO1-like beta (S. cerevisiae)	1	0	0	1	1
NM_026186	Ccdc49	coiled-coil domain containing 49	1	0	0	1	1
NM_026191	Dhx40	DEAH (Asp-Glu-Ala-His) box polypeptide 40	1	0	0	1	1
NM_026260	Tctn3	tectonic family member 3	1	0	0	1	1
NM_026269	1110007L15Rik	RIKEN cDNA 1110007L15 gene	1	0	0	1	1
NM_026342	1810073G14Rik	RIKEN cDNA 1810073G14 gene	1	0	0	1	1
NM_026353	4930570C03Rik	RIKEN cDNA 4930570C03 gene	1	0	0	1	1
NM_026373	Cdk2ap2	CDK2-associated protein 2	1	0	0	1	1
NM_026410	Cdca5	cell division cycle associated 5	1	0	0	1	1
NM_026423	2410018C20Rik	RIKEN cDNA 2410018C20 gene	1	0	0	1	1
NM_026444	Cs	citrate synthase	1	0	0	1	1
NM_026445	Sumf2	sulfatase modifying factor 2	1	0	0	1	1
NM_026459	Ccdc70	coiled-coil domain containing 70	1	0	0	1	1
NM_026498	Mrps11	mitochondrial ribosomal protein S11	1	0	0	1	1
NM_026529	2700062C07Rik	RIKEN cDNA 2700062C07 gene	1	0	0	1	1
NM_026535	Serpina12	serine (or cysteine) peptidase inhibitor, clade A (alpha-1 antiproteinase, antitrypsin), member 12	1	0	0	1	1
NM_026556	Dynll2	dynein light chain LC8-type 2	1	0	0	1	1
NM_026577	Arl13b	ADP-ribosylation factor-like 13B	1	0	0	1	1
NM_026603	Denr	density-regulated protein	1	0	0	1	1
NM_026615	Urm1	ubiquitin related modifier 1 homolog (S. cerevisiae)	1	0	0	1	1
NM_026666	Ubn1	ubinuclein 1	1	0	0	1	1
NM_026669	Tegt	testis enhanced gene transcript	1	0	0	1	1
NM_026743	Tspan11	tetraspanin 11	1	0	0	1	1
NM_026817	Rabl2a	RAB, member of RAS oncogene family-like 2A	1	0	0	1	1
NM_026833	ORF19	open reading frame 19	1	0	0	1	1
NM_026844	2310061C15Rik	RIKEN cDNA 2310061C15 gene	1	0	0	1	1
NM_026888	Phkg2	phosphorylase kinase, gamma 2 (testis)	1	0	0	1	1
NM_026917	Zdhhc3	zinc finger, DHHC domain containing 3	1	0	0	1	1
NM_026950	Ociad2	OCIA domain containing 2	1	0	0	1	1
NM_027002	Polr2d	polymerase (RNA) II (DNA directed) polypeptide D	1	0	0	1	1
NM_027045	Gcap14	granule cell antiserum positive 14	1	0	0	1	1
NM_027101	Polr2d	polymerase (RNA) II (DNA directed) polypeptide D	1	0	0	1	1
NM_027120	Itgb1bp3	integrin beta 1 binding protein 3	1	0	0	1	1
NM_027184	Ipmk	inositol polyphosphate multikinase	1	0	0	1	1
NM_027192	Ttl	tubulin tyrosine ligase	1	0	0	1	1
NM_027195	Casz1	castor homolog 1, zinc finger (Drosophila)	1	0	0	1	1
NM_027216	Slc39a11	solute carrier family 39 (metal ion transporter), member 11	1	0	0	1	1
NM_027220	Prss32	protease, serine, 32	1	0	0	1	1
NM_027250	2010305A19Rik	RIKEN cDNA 2010305A19 gene	1	0	0	1	1
NM_027268	Scrn1	secernin 1	1	0	0	1	1
NM_027295	Rab28	RAB28, member RAS oncogene family	1	0	0	1	1
NM_027326	Mllt3	myeloid/lymphoid or mixed-lineage leukemia (trithorax homolog, Drosophila); translocated to, 3	1	0	0	1	1
NM_027405	1700020O03Rik	RIKEN cDNA 1700020O03 gene	1	0	0	1	1
NM_027420	2610034B18Rik	RIKEN cDNA 2610034B18 gene	1	0	0	1	1
NM_027425	Rufy2	RUN and FYVE domain-containing 2	1	0	0	1	1
NM_027446	5730409G15Rik	RIKEN cDNA 5730409G15 gene	1	0	0	1	1
NM_027543	Gpr173	G-protein coupled receptor 173	1	0	0	1	1
NM_027614	Wdr20b	WD repeat domain 20b	1	0	0	1	1
NM_027619	Ttc14	tetratricopeptide repeat domain 14	1	0	0	1	1
NM_027915	Ap2b1	adaptor-related protein complex 2, beta 1 subunit	1	0	0	1	1
NM_027921	Slc16a14	solute carrier family 16 (monocarboxylic acid transporters), member 14	1	0	0	1	1
NM_027984	Epn3	epsin 3	1	0	0	1	1
NM_028018	2400003C14Rik	RIKEN cDNA 2400003C14 gene	1	0	0	1	1
NM_028071	Cotl1	coactosin-like 1 (Dictyostelium)	1	0	0	1	1
NM_028079	2010111I01Rik	RIKEN cDNA 2010111I01 gene	1	0	0	1	1
NM_028087	Gcnt3	glucosaminyl (N-acetyl) transferase 3, mucin type	1	0	0	1	1
NM_028099	Dusp11	dual specificity phosphatase 11 (RNA/RNP complex 1-interacting)	1	0	0	1	1
NM_028150	Supt7l	suppressor of Ty 7 (S. cerevisiae)-like	1	0	0	1	1
NM_028199	Plxdc1	plexin domain containing 1	1	0	0	1	1
NM_028407	Gcap14	granule cell antiserum positive 14	1	0	0	1	1
NM_028459	Wasl	Wiskott-Aldrich syndrome-like (human)	1	0	0	1	1
NM_028604	Trmt11	tRNA methyltransferase 11 homolog (S. cerevisiae)	1	0	0	1	1
NM_028615	Dppa2	developmental pluripotency associated 2	1	0	0	1	1
NM_028712	Rap2b	RAP2B, member of RAS oncogene family	1	0	0	1	1
NM_028728	Nfam1	Nfat activating molecule with ITAM motif 1	1	0	0	1	1
NM_028733	Pacsin3	protein kinase C and casein kinase substrate in neurons 3	1	0	0	1	1
NM_028752	Hvcn1	hydrogen voltage-gated channel 1	1	0	0	1	1
NM_028761	Parn	poly(A)-specific ribonuclease (deadenylation nuclease)	1	0	0	1	1
NM_028776	Scyl3	SCY1-like 3 (S. cerevisiae)	1	0	0	1	1
NM_028791	1300018I05Rik	RIKEN cDNA 1300018I05 gene	1	0	0	1	1
NM_028805	Katnb1	katanin p80 (WD40-containing) subunit B 1	1	0	0	1	1
NM_028888	4931428F04Rik	RIKEN cDNA 4931428F04 gene	1	0	0	1	1
NM_028894	Lonrf3	LON peptidase N-terminal domain and ring finger 3	1	0	0	1	1
NM_028930	Tmc5	transmembrane channel-like gene family 5	1	0	0	1	1
NM_028943	Sgms2	sphingomyelin synthase 2	1	0	0	1	1
NM_028953	Tmc1	transmembrane channel-like gene family 1	1	0	0	1	1
NM_028995	Npal3	NIPA-like domain containing 3	1	0	0	1	1
NM_029012	Sppl3	signal peptide peptidase 3	1	0	0	1	1
NM_029101	1110014J01Rik	RIKEN cDNA 1110014J01 gene	1	0	0	1	1
NM_029331	1700019G17Rik	RIKEN cDNA 1700019G17 gene	1	0	0	1	1
NM_029342	Nhej1	nonhomologous end-joining factor 1	1	0	0	1	1
NM_029426	Brsk2	BR serine/threonine kinase 2	1	0	0	1	1
NM_029466	Arl5b	ADP-ribosylation factor-like 5B	1	0	0	1	1
NM_029505	Ap3m2	adaptor-related protein complex 3, mu 2 subunit	1	0	0	1	1
NM_029508	Pcgf5	polycomb group ring finger 5	1	0	0	1	1
NM_029529	Slc35d3	solute carrier family 35, member D3	1	0	0	1	1
NM_029573	Idh3a	isocitrate dehydrogenase 3 (NAD+) alpha	1	0	0	1	1
NM_029604	1700027A23Rik	RIKEN cDNA 1700027A23 gene	1	0	0	1	1
NM_029657	Mgrn1	mahogunin, ring finger 1	1	0	0	1	1
NM_029734	2410187C16Rik	RIKEN cDNA 2410187C16 gene	1	0	0	1	1
NM_029752	Bri3bp	Bri3 binding protein	1	0	0	1	1
NM_029763	Polr3f	polymerase (RNA) III (DNA directed) polypeptide F	1	0	0	1	1
NM_029770	Unc5b	unc-5 homolog B (C. elegans)	1	0	0	1	1
NM_029780	Raf1	v-raf-leukemia viral oncogene 1	1	0	0	1	1
NM_029788	Rnft1	ring finger protein, transmembrane 1	1	0	0	1	1
NM_029810	Nt5c2	5"-nucleotidase, cytosolic II	1	0	0	1	1
NM_029851	Dync2h1	dynein cytoplasmic 2 heavy chain 1	1	0	0	1	1
NM_029862	5930434B04Rik	RIKEN cDNA 5930434B04 gene	1	0	0	1	1
NM_029931	Mllt3	myeloid/lymphoid or mixed-lineage leukemia (trithorax homolog, Drosophila); translocated to, 3	1	0	0	1	1
NM_029956	Mmab	methylmalonic aciduria (cobalamin deficiency) type B homolog (human)	1	0	0	1	1
NM_029967	Adamtsl1	ADAMTS-like 1	1	0	0	1	1
NM_030145	Lsm6	LSM6 homolog, U6 small nuclear RNA associated (S. cerevisiae)	1	0	0	1	1
NM_030206	Cygb	cytoglobin	1	0	0	1	1
NM_030228	Gas2l1	growth arrest-specific 2 like 1	1	0	0	1	1
NM_030262	Pofut2	protein O-fucosyltransferase 2	1	0	0	1	1
NM_030566	Rabep2	rabaptin, RAB GTPase binding effector protein 2	1	0	0	1	1
NM_030719	Gats	opposite strand transcription unit to Stag3	1	0	0	1	1
NM_030880	Pacsin3	protein kinase C and casein kinase substrate in neurons 3	1	0	0	1	1
NM_031184	Glis2	GLIS family zinc finger 2	1	0	0	1	1
NM_031997	Tmem2	transmembrane protein 2	1	0	0	1	1
NM_052994	Spock2	sparc/osteonectin, cwcv and kazal-like domains proteoglycan 2	1	0	0	1	1
NM_053009	Zfp91	zinc finger protein 91	1	0	0	1	1
NM_053015	Mlph	melanophilin	1	0	0	1	1
NM_053069	Atg5	autophagy-related 5 (yeast)	1	0	0	1	1
NM_053086	Nolc1	nucleolar and coiled-body phosphoprotein 1	1	0	0	1	1
NM_053087	Epgn	epithelial mitogen	1	0	0	1	1
NM_053096	Cml2	camello-like 2	1	0	0	1	1
NM_053103	Entpd7	ectonucleoside triphosphate diphosphohydrolase 7	1	0	0	1	1
NM_053104	Rbm9	RNA binding motif protein 9	1	0	0	1	1
NM_053155	Clmn	calmin	1	0	0	1	1
NM_053182	Pag1	phosphoprotein associated with glycosphingolipid microdomains 1	1	0	0	1	1
NM_053185	Col4a6	collagen, type IV, alpha 6	1	0	0	1	1
NM_053199	Cadm3	cell adhesion molecule 3	1	0	0	1	1
NM_053204	Erc1	ELKS/RAB6-interacting/CAST family member 1	1	0	0	1	1
NM_053242	Foxp2	forkhead box P2	1	0	0	1	1
NM_053268	Rasa2	RAS p21 protein activator 2	1	0	0	1	1
NM_053269	Rad51c	Rad51 homolog c (S. cerevisiae)	1	0	0	1	1
NM_054048	Rcor2	REST corepressor 2	1	0	0	1	1
NM_054078	Baz2a	bromodomain adjacent to zinc finger domain, 2A	1	0	0	1	1
NM_054096	Tirap	toll-interleukin 1 receptor (TIR) domain-containing adaptor protein	1	0	0	1	1
NM_080436	Rdh1	retinol dehydrogenase 1 (all trans)	1	0	0	1	1
NM_080562	Ubox5	U box domain containing 5	1	0	0	1	1
NM_080563	Rnf144a	ring finger protein 144A	1	0	0	1	1
NM_080726	Rem2	rad and gem related GTP binding protein 2	1	0	0	1	1
NM_080793	Setd7	SET domain containing (lysine methyltransferase) 7	1	0	0	1	1
NM_080848	Wdr5	WD repeat domain 5	1	0	0	1	1
NM_080855	Zcchc14	zinc finger, CCHC domain containing 14	1	0	0	1	1
NM_130450	Elovl6	ELOVL family member 6, elongation of long chain fatty acids (yeast)	1	0	0	1	1
NM_130458	Sp7	trans-acting transcription factor 7	1	0	0	1	1
NM_130856	Krtap16-8	keratin associated protein 16-8	1	0	0	1	1
NM_130880	Otud7a	OTU domain containing 7A	1	0	0	1	1
NM_130892	Rtn4ip1	reticulon 4 interacting protein 1	1	0	0	1	1
NM_130893	Scrt1	scratch homolog 1, zinc finger protein (Drosophila)	1	0	0	1	1
NM_133167	Parvb	parvin, beta	1	0	0	1	1
NM_133186	Steap3	STEAP family member 3	1	0	0	1	1
NM_133202	Trhr2	thyrotropin releasing hormone receptor 2	1	0	0	1	1
NM_133206	Znrf1	zinc and ring finger 1	1	0	0	1	1
NM_133218	Zfp704	zinc finger protein 704	1	0	0	1	1
NM_133232	Pfkfb3	6-phosphofructo-2-kinase/fructose-2,6-biphosphatase 3	1	0	0	1	1
NM_133345	Ing4	inhibitor of growth family, member 4	1	0	0	1	1
NM_133676	Osgep	O-sialoglycoprotein endopeptidase	1	0	0	1	1
NM_133683	Tmem19	transmembrane protein 19	1	0	0	1	1
NM_133715	Arhgap27	Rho GTPase activating protein 27	1	0	0	1	1
NM_133716	Smap2	stromal membrane-associated GTPase-activating protein 2	1	0	0	1	1
NM_133734	Wdr23	WD repeat domain 23	1	0	0	1	1
NM_133744	Ccdc71	coiled-coil domain containing 71	1	0	0	1	1
NM_133754	Fblim1	filamin binding LIM protein 1	1	0	0	1	1
NM_133758	Usp47	ubiquitin specific peptidase 47	1	0	0	1	1
NM_133783	Ptges2	prostaglandin E synthase 2	1	0	0	1	1
NM_133784	Wwtr1	WW domain containing transcription regulator 1	1	0	0	1	1
NM_133789	Strn4	striatin, calmodulin binding protein 4	1	0	0	1	1
NM_133835	Ubac1	ubiquitin associated domain containing 1	1	0	0	1	1
NM_133886	AU040320	expressed sequence AU040320	1	0	0	1	1
NM_133907	Ube3c	ubiquitin protein ligase E3C	1	0	0	1	1
NM_133910	Tbc1d14	TBC1 domain family, member 14	1	0	0	1	1
NM_133919	Aff1	AF4/FMR2 family, member 1	1	0	0	1	1
NM_133942	Plekha1	pleckstrin homology domain containing, family A (phosphoinositide binding specific) member 1	1	0	0	1	1
NM_133953	Sf3b3	splicing factor 3b, subunit 3	1	0	0	1	1
NM_133957	Nfat5	nuclear factor of activated T-cells 5	1	0	0	1	1
NM_133962	Arhgef18	rho/rac guanine nucleotide exchange factor (GEF) 18	1	0	0	1	1
NM_133974	Cdcp1	CUB domain containing protein 1	1	0	0	1	1
NM_133983	Cd276	CD276 antigen	1	0	0	1	1
NM_134002	Csnk1g2	casein kinase 1, gamma 2	1	0	0	1	1
NM_134015	Fbxw11	F-box and WD-40 domain protein 11	1	0	0	1	1
NM_134041	4930427A07Rik	RIKEN cDNA 4930427A07 gene	1	0	0	1	1
NM_134044	AI413782	expressed sequence AI413782	1	0	0	1	1
NM_134046	Cenpo	centromere protein O	1	0	0	1	1
NM_134052	Adi1	acireductone dioxygenase 1	1	0	0	1	1
NM_134082	Farp1	FERM, RhoGEF (Arhgef) and pleckstrin domain protein 1 (chondrocyte-derived)	1	0	0	1	1
NM_134086	Slc38a1	solute carrier family 38, member 1	1	0	0	1	1
NM_134093	Letmd1	LETM1 domain containing 1	1	0	0	1	1
NM_134111	Eaf2	ELL associated factor 2	1	0	0	1	1
NM_134150	Otub1	OTU domain, ubiquitin aldehyde binding 1	1	0	0	1	1
NM_134155	Brms1	breast cancer metastasis-suppressor 1	1	0	0	1	1
NM_134163	Mbnl3	muscleblind-like 3 (Drosophila)	1	0	0	1	1
NM_138598	D11Wsu99e	DNA segment, Chr 11, Wayne State University 99, expressed	1	0	0	1	1
NM_138599	Tomm70a	translocase of outer mitochondrial membrane 70 homolog A (yeast)	1	0	0	1	1
NM_138651	Cds2	CDP-diacylglycerol synthase (phosphatidate cytidylyltransferase) 2	1	0	0	1	1
NM_138657	Socs7	suppressor of cytokine signaling 7	1	0	0	1	1
NM_138669	Eif4a3	eukaryotic translation initiation factor 4A, isoform 3	1	0	0	1	1
NM_138676	Shkbp1	Sh3kbp1 binding protein 1	1	0	0	1	1
NM_138956	Rassf3	Ras association (RalGDS/AF-6) domain family member 3	1	0	0	1	1
NM_139001	Cspg4	chondroitin sulfate proteoglycan 4	1	0	0	1	1
NM_139141	Zfp192	zinc finger protein 192	1	0	0	1	1
NM_139229	Cog8	component of oligomeric golgi complex 8	1	0	0	1	1
NM_144516	Zmynd11	zinc finger, MYND domain containing 11	1	0	0	1	1
NM_144527	Ccdc21	coiled-coil domain containing 21	1	0	0	1	1
NM_144545	Eif3j	eukaryotic translation initiation factor 3, subunit J	1	0	0	1	1
NM_144549	Trib1	tribbles homolog 1 (Drosophila)	1	0	0	1	1
NM_144557	Myrip	myosin VIIA and Rab interacting protein	1	0	0	1	1
NM_144786	Ggt7	gamma-glutamyltransferase 7	1	0	0	1	1
NM_144812	Tnrc6b	trinucleotide repeat containing 6b	1	0	0	1	1
NM_144817	Camk1g	calcium/calmodulin-dependent protein kinase I gamma	1	0	0	1	1
NM_144819	Ccdc92	coiled-coil domain containing 92	1	0	0	1	1
NM_144832	BC017643	cDNA sequence BC017643	1	0	0	1	1
NM_144857	BC011248	cDNA sequence BC011248	1	0	0	1	1
NM_144866	Etf1	eukaryotic translation termination factor 1	1	0	0	1	1
NM_144935	BC018242	cDNA sequence BC018242	1	0	0	1	1
NM_144948	Rbm7	RNA binding motif protein 7	1	0	0	1	1
NM_145133	Tifa	TRAF-interacting protein with forkhead-associated domain	1	0	0	1	1
NM_145138	Nek9	NIMA (never in mitosis gene a)-related expressed kinase 9	1	0	0	1	1
NM_145218	Wbscr17	Williams-Beuren syndrome chromosome region 17 homolog (human)	1	0	0	1	1
NM_145219	Lgi3	leucine-rich repeat LGI family, member 3	1	0	0	1	1
NM_145355	Rnf185	ring finger protein 185	1	0	0	1	1
NM_145356	Zbtb7c	zinc finger and BTB domain containing 7C	1	0	0	1	1
NM_145427	Atpaf2	ATP synthase mitochondrial F1 complex assembly factor 2	1	0	0	1	1
NM_145436	Cdc27	cell division cycle 27 homolog (S. cerevisiae)	1	0	0	1	1
NM_145458	Pxk	PX domain containing serine/threonine kinase	1	0	0	1	1
NM_145468	Skp2	S-phase kinase-associated protein 2 (p45)	1	0	0	1	1
NM_145469	Npal2	NIPA-like domain containing 2	1	0	0	1	1
NM_145487	Prr3	proline-rich polypeptide 3	1	0	0	1	1
NM_145492	Zfp521	zinc finger protein 521	1	0	0	1	1
NM_145502	Erlin1	ER lipid raft associated 1	1	0	0	1	1
NM_145525	Osbpl6	oxysterol binding protein-like 6	1	0	0	1	1
NM_145556	Tardbp	TAR DNA binding protein	1	0	0	1	1
NM_145557	9430015G10Rik	RIKEN cDNA 9430015G10 gene	1	0	0	1	1
NM_145564	Fbxo21	F-box protein 21	1	0	0	1	1
NM_145590	BC017158	cDNA sequence BC017158	1	0	0	1	1
NM_145604	D230025D16Rik	RIKEN cDNA D230025D16 gene	1	0	0	1	1
NM_145760	Arfgap1	ADP-ribosylation factor GTPase activating protein 1	1	0	0	1	1
NM_145823	Pitpnc1	phosphatidylinositol transfer protein, cytoplasmic 1	1	0	0	1	1
NM_145824	Ranbp10	RAN binding protein 10	1	0	0	1	1
NM_145828	Xylt2	xylosyltransferase II	1	0	0	1	1
NM_145839	Rasgef1b	RasGEF domain family, member 1B	1	0	0	1	1
NM_145927	Fntb	farnesyltransferase, CAAX box, beta	1	0	0	1	1
NM_145994	Abi1	abl-interactor 1	1	0	0	1	1
NM_146016	C230094A16Rik	RIKEN cDNA C230094A16 gene	1	0	0	1	1
NM_146032	Srp68	signal recognition particle 68	1	0	0	1	1
NM_146081	Ppp4r1	protein phosphatase 4, regulatory subunit 1	1	0	0	1	1
NM_146107	Actr1b	ARP1 actin-related protein 1 homolog B (yeast)	1	0	0	1	1
NM_146119	9130404D14Rik	RIKEN cDNA 9130404D14 gene	1	0	0	1	1
NM_146162	Tmem119	transmembrane protein 119	1	0	0	1	1
NM_146178	Ccdc106	coiled-coil domain containing 106	1	0	0	1	1
NM_146188	Kctd15	potassium channel tetramerisation domain containing 15	1	0	0	1	1
NM_146234	Tmem32	transmembrane protein 32	1	0	0	1	1
NM_146241	Trhde	TRH-degrading enzyme	1	0	0	1	1
NM_146256	Hpdl	4-hydroxyphenylpyruvate dioxygenase-like	1	0	0	1	1
NM_148932	Pom121	nuclear pore membrane protein 121	1	0	0	1	1
NM_153068	Ehd2	EH-domain containing 2	1	0	0	1	1
NM_153088	Ctdsp1	CTD (carboxy-terminal domain, RNA polymerase II, polypeptide A) small phosphatase 1	1	0	0	1	1
NM_153105	Cldn19	claudin 19	1	0	0	1	1
NM_153134	Irgq	immunity-related GTPase family, Q	1	0	0	1	1
NM_153167	Wdr32	WD repeat domain 32	1	0	0	1	1
NM_153169	Pnma3	paraneoplastic antigen MA3	1	0	0	1	1
NM_153177	Eif2c4	eukaryotic translation initiation factor 2C, 4	1	0	0	1	1
NM_153287	Axud1	AXIN1 up-regulated 1	1	0	0	1	1
NM_153407	Csrnp2	cysteine-serine-rich nuclear protein 2	1	0	0	1	1
NM_153408	Lincr	lung-inducible neuralized-related C3HC4 RING domain protein	1	0	0	1	1
NM_153412	Phldb2	pleckstrin homology-like domain, family B, member 2	1	0	0	1	1
NM_153413	Dock3	dedicator of cyto-kinesis 3	1	0	0	1	1
NM_153414	Ints9	integrator complex subunit 9	1	0	0	1	1
NM_153484	Tef	thyrotroph embryonic factor	1	0	0	1	1
NM_153509	AF529169	cDNA sequence AF529169	1	0	0	1	1
NM_153516	Bcl2l13	BCL2-like 13 (apoptosis facilitator)	1	0	0	1	1
NM_153525	Tmem41b	transmembrane protein 41B	1	0	0	1	1
NM_153541	Zbtb8	zinc finger and BTB domain containing 8	1	0	0	1	1
NM_153592	Erlin2	ER lipid raft associated 2	1	0	0	1	1
NM_153599	Cdk8	cyclin-dependent kinase 8	1	0	0	1	1
NM_153780	2610044O15Rik	RIKEN cDNA 2610044O15 gene	1	0	0	1	1
NM_153781	Pygb	brain glycogen phosphorylase	1	0	0	1	1
NM_153785	Cdkl3	cyclin-dependent kinase-like 3	1	0	0	1	1
NM_153794	4933403F05Rik	RIKEN cDNA 4933403F05 gene	1	0	0	1	1
NM_172050	Cd300e	CD300e antigen	1	0	0	1	1
NM_172120	Vps41	vacuolar protein sorting 41 (yeast)	1	0	0	1	1
NM_172154	Lcor	ligand dependent nuclear receptor corepressor	1	0	0	1	1
NM_172254	Dph3	DPH3 homolog (KTI11, S. cerevisiae)	1	0	0	1	1
NM_172261	Ppp1r9b	protein phosphatase 1, regulatory subunit 9B	1	0	0	1	1
NM_172286	6430548M08Rik	RIKEN cDNA 6430548M08 gene	1	0	0	1	1
NM_172296	Dmrta2	doublesex and mab-3 related transcription factor like family A2	1	0	0	1	1
NM_172302	5730453I16Rik	RIKEN cDNA 5730453I16 gene	1	0	0	1	1
NM_172306	Cyp4a12b	cytochrome P450, family 4, subfamily a, polypeptide 12B	1	0	0	1	1
NM_172379	AA536717	expressed sequence AA536717	1	0	0	1	1
NM_172391	Ahsa2	AHA1, activator of heat shock protein ATPase homolog 2 (yeast)	1	0	0	1	1
NM_172397	Limd2	LIM domain containing 2	1	0	0	1	1
NM_172406	Trak2	trafficking protein, kinesin binding 2	1	0	0	1	1
NM_172416	Ostm1	osteopetrosis associated transmembrane protein 1	1	0	0	1	1
NM_172420	Ppp1r1c	protein phosphatase 1, regulatory (inhibitor) subunit 1C	1	0	0	1	1
NM_172426	Slc24a2	solute carrier family 24 (sodium/potassium/calcium exchanger), member 2	1	0	0	1	1
NM_172446	Lbxcor1	ladybird homeobox 1 homolog (Drosophila) corepressor 1	1	0	0	1	1
NM_172448	Rnf43	ring finger protein 43	1	0	0	1	1
NM_172456	Endogl1	endonuclease G-like 1	1	0	0	1	1
NM_172458	9030612M13Rik	RIKEN cDNA 9030612M13 gene	1	0	0	1	1
NM_172476	Tmc7	transmembrane channel-like gene family 7	1	0	0	1	1
NM_172509	Kctd7	potassium channel tetramerisation domain containing 7	1	0	0	1	1
NM_172513	D1Ertd53e	DNA segment, Chr 1, ERATO Doi 53, expressed	1	0	0	1	1
NM_172514	Tmem71	transmembrane protein 71	1	0	0	1	1
NM_172516	Ripk5	receptor interacting protein kinase 5	1	0	0	1	1
NM_172534	4932411E22Rik	RIKEN cDNA 4932411E22 gene	1	0	0	1	1
NM_172564	Tns4	tensin 4	1	0	0	1	1
NM_172573	D230014K01Rik	RIKEN cDNA D230014K01 gene	1	0	0	1	1
NM_172584	Itpk1	inositol 1,3,4-triphosphate 5/6 kinase	1	0	0	1	1
NM_172588	Serinc5	serine incorporator 5	1	0	0	1	1
NM_172590	Wdr41	WD repeat domain 41	1	0	0	1	1
NM_172595	Arl15	ADP-ribosylation factor-like 15	1	0	0	1	1
NM_172604	Scara3	scavenger receptor class A, member 3	1	0	0	1	1
NM_172606	2014-03-06	membrane-associated ring finger (C3HC4) 6	1	0	0	1	1
NM_172611	Gramd4	GRAM domain containing 4	1	0	0	1	1
NM_172632	Mapk4	mitogen-activated protein kinase 4	1	0	0	1	1
NM_172643	Zbtb41	zinc finger and BTB domain containing 41 homolog	1	0	0	1	1
NM_172652	4632411B12Rik	RIKEN cDNA 4632411B12 gene	1	0	0	1	1
NM_172660	D2Wsu81e	DNA segment, Chr 2, Wayne State University 81, expressed	1	0	0	1	1
NM_172661	5830434P21Rik	RIKEN cDNA 5830434P21 gene	1	0	0	1	1
NM_172695	Plaa	phospholipase A2, activating protein	1	0	0	1	1
NM_172728	Creb5	cAMP responsive element binding protein 5	1	0	0	1	1
NM_172729	Nod1	nucleotide-binding oligomerization domain containing 1	1	0	0	1	1
NM_172739	Grlf1	glucocorticoid receptor DNA binding factor 1	1	0	0	1	1
NM_172741	4931406P16Rik	RIKEN cDNA 4931406P16 gene	1	0	0	1	1
NM_172748	Fbxl19	F-box and leucine-rich repeat protein 19	1	0	0	1	1
NM_172772	B230380D07Rik	RIKEN cDNA B230380D07 gene	1	0	0	1	1
NM_172790	Ankrd52	ankyrin repeat domain 52	1	0	0	1	1
NM_172851	C230078M14Rik	RIKEN cDNA C230078M14Rik gene	1	0	0	1	1
NM_172861	Slc7a14	solute carrier family 7 (cationic amino acid transporter, y+ system), member 14	1	0	0	1	1
NM_172867	Zfp462	zinc finger protein 462	1	0	0	1	1
NM_172868	Palm2	paralemmin 2	1	0	0	1	1
NM_172872	Kank4	KN motif and ankyrin repeat domains 4	1	0	0	1	1
NM_172878	B230396O12Rik	RIKEN cDNA B230396O12 gene	1	0	0	1	1
NM_172924	C230081A13Rik	RIKEN cDNA C230081A13 gene	1	0	0	1	1
NM_172958	Mtmr12	myotubularin related protein 12	1	0	0	1	1
NM_172966	Sh3rf2	SH3 domain containing ring finger 2	1	0	0	1	1
NM_173006	Pon3	paraoxonase 3	1	0	0	1	1
NM_173015	Mon1b	MON1 homolog b (yeast)	1	0	0	1	1
NM_173031	BC066135	cDNA sequence BC066135	1	0	0	1	1
NM_173185	Csnk1g1	casein kinase 1, gamma 1	1	0	0	1	1
NM_173186	Tbc1d24	TBC1 domain family, member 24	1	0	0	1	1
NM_173189	Mcph1	microcephaly, primary autosomal recessive 1	1	0	0	1	1
NM_173363	Eif5	eukaryotic translation initiation factor 5	1	0	0	1	1
NM_173386	E330016A19Rik	RIKEN cDNA E330016A19 gene	1	0	0	1	1
NM_173390	Nhsl1	NHS-like 1	1	0	0	1	1
NM_173409	4933402N03Rik	RIKEN cDNA 4933402N03 gene	1	0	0	1	1
NM_173422	Colec10	collectin sub-family member 10	1	0	0	1	1
NM_173424	Zbtb37	zinc finger and BTB domain containing 37	1	0	0	1	1
NM_173426	1700012H17Rik	RIKEN cDNA 1700012H17 gene	1	0	0	1	1
NM_173427	Klhdc7a	kelch domain containing 7A	1	0	0	1	1
NM_173446	AW121567	expressed sequence AW121567	1	0	0	1	1
NM_173746	OTTMUSG00000004461	predicted gene, OTTMUSG00000004461	1	0	0	1	1
NM_173748	Nudcd3	NudC domain containing 3	1	0	0	1	1
NM_173761	Ythdf1	YTH domain family 1	1	0	0	1	1
NM_173779	Ankrd58	ankyrin repeat domain 58	1	0	0	1	1
NM_173865	Slc41a1	solute carrier family 41, member 1	1	0	0	1	1
NM_173868	St18	suppression of tumorigenicity 18	1	0	0	1	1
NM_174850	Micall2	MICAL-like 2	1	0	0	1	1
NM_174868	C030011O14Rik	RIKEN cDNA C030011O14 gene	1	0	0	1	1
NM_174991	Bai1	brain-specific angiogenesis inhibitor 1	1	0	0	1	1
NM_174997	BC043098	cDNA sequence BC043098	1	0	0	1	1
NM_175090	Slc31a1	solute carrier family 31, member 1	1	0	0	1	1
NM_175095	Commd2	COMM domain containing 2	1	0	0	1	1
NM_175096	Stbd1	starch binding domain 1	1	0	0	1	1
NM_175102	Sf3b5	splicing factor 3b, subunit 5	1	0	0	1	1
NM_175104	2810012G03Rik	RIKEN cDNA 2810012G03 gene	1	0	0	1	1
NM_175111	Hspbap1	Hspb associated protein 1	1	0	0	1	1
NM_175114	Trak1	trafficking protein, kinesin binding 1	1	0	0	1	1
NM_175136	Rnf122	ring finger protein 122	1	0	0	1	1
NM_175184	2610528K11Rik	RIKEN cDNA 2610528K11 gene	1	0	0	1	1
NM_175189	Hepacam	hepatocyte cell adhesion molecule	1	0	0	1	1
NM_175201	Rnf38	ring finger protein 38	1	0	0	1	1
NM_175206	Fbxl22	F-box and leucine-rich repeat protein 22	1	0	0	1	1
NM_175212	Tmem65	transmembrane protein 65	1	0	0	1	1
NM_175224	Metap1	methionyl aminopeptidase 1	1	0	0	1	1
NM_175234	6230409E13Rik	RIKEN cDNA 6230409E13 gene	1	0	0	1	1
NM_175266	Epm2aip1	EPM2A (laforin) interacting protein 1	1	0	0	1	1
NM_175270	Ankrd56	ankyrin repeat domain 56	1	0	0	1	1
NM_175309	Upk3b	uroplakin 3B	1	0	0	1	1
NM_175331	Nt5dc3	5"-nucleotidase domain containing 3	1	0	0	1	1
NM_175357	Crbn	cereblon	1	0	0	1	1
NM_175358	Zdhhc15	zinc finger, DHHC domain containing 15	1	0	0	1	1
NM_175398	6530418L21Rik	RIKEN cDNA 6530418L21 gene	1	0	0	1	1
NM_175433	Zfp710	zinc finger protein 710	1	0	0	1	1
NM_175437	A530088I07Rik	RIKEN cDNA A530088I07 gene	1	0	0	1	1
NM_175438	Aldh4a1	aldehyde dehydrogenase 4 family, member A1	1	0	0	1	1
NM_175439	Mars2	methionine-tRNA synthetase 2 (mitochondrial)	1	0	0	1	1
NM_175443	Etnk2	ethanolamine kinase 2	1	0	0	1	1
NM_175484	Coro2b	coronin, actin binding protein, 2B	1	0	0	1	1
NM_175485	Prtg	protogenin homolog (Gallus gallus)	1	0	0	1	1
NM_175507	Tmem20	transmembrane protein 20	1	0	0	1	1
NM_175518	D730040F13Rik	RIKEN cDNA D730040F13 gene	1	0	0	1	1
NM_175521	6430598A04Rik	RIKEN cDNA 6430598A04 gene	1	0	0	1	1
NM_175526	Clec1a	C-type lectin domain family 1, member a	1	0	0	1	1
NM_175543	Rab11fip4	RAB11 family interacting protein 4 (class II)	1	0	0	1	1
NM_175696	C530028O21Rik	RIKEN cDNA C530028O21 gene	1	0	0	1	1
NM_175935	G6pc3	glucose 6 phosphatase, catalytic, 3	1	0	0	1	1
NM_176833	Ppm1f	protein phosphatase 1F (PP2C domain containing)	1	0	0	1	1
NM_176839	Abcc5	ATP-binding cassette, sub-family C (CFTR/MRP), member 5	1	0	0	1	1
NM_176958	Hif1an	hypoxia-inducible factor 1, alpha subunit inhibitor	1	0	0	1	1
NM_176998	5730410E15Rik	RIKEN cDNA 5730410E15 gene	1	0	0	1	1
NM_177013	6332401O19Rik	RIKEN cDNA 6332401O19 gene	1	0	0	1	1
NM_177073	Relt	RELT tumor necrosis factor receptor	1	0	0	1	1
NM_177082	Sp8	trans-acting transcription factor 8	1	0	0	1	1
NM_177083	B430306N03Rik	RIKEN cDNA B430306N03 gene	1	0	0	1	1
NM_177089	Tacc1	transforming, acidic coiled-coil containing protein 1	1	0	0	1	1
NM_177099	Lefty2	Left-right determination factor 2	1	0	0	1	1
NM_177129	Cntn2	contactin 2	1	0	0	1	1
NM_177135	D830030K20Rik	RIKEN cDNA D830030K20 gene	1	0	0	1	1
NM_177145	Pde4dip	phosphodiesterase 4D interacting protein (myomegalin)	1	0	0	1	1
NM_177158	5830482F20Rik	RIKEN cDNA 5830482F20 gene	1	0	0	1	1
NM_177215	Ocrl	oculocerebrorenal syndrome of Lowe	1	0	0	1	1
NM_177216	Cyb5r2	cytochrome b5 reductase 2	1	0	0	1	1
NM_177226	Zfp629	zinc finger protein 629	1	0	0	1	1
NM_177239	Mysm1	myb-like, SWIRM and MPN domains 1	1	0	0	1	1
NM_177307	Cyp4f39	cytochrome P450, family 4, subfamily f, polypeptide 39	1	0	0	1	1
NM_177319	Zfyve27	zinc finger, FYVE domain containing 27	1	0	0	1	1
NM_177335	D930020B18Rik	RIKEN cDNA D930020B18 gene	1	0	0	1	1
NM_177366	Gpr157	G protein-coupled receptor 157	1	0	0	1	1
NM_177406	Cyp4a12a	cytochrome P450, family 4, subfamily a, polypeptide 12a	1	0	0	1	1
NM_177562	Clec16a	C-type lectin domain family 16, member A	1	0	0	1	1
NM_177592	Tmem164	transmembrane protein 164	1	0	0	1	1
NM_177598	Fbxw13	F-box and WD-40 domain protein 13	1	0	0	1	1
NM_177630	Ldoc1l	leucine zipper, down-regulated in cancer 1-like	1	0	0	1	1
NM_177658	B230339M05Rik	RIKEN cDNA B230339M05 gene	1	0	0	1	1
NM_177664	D3Bwg0562e	DNA segment, Chr 3, Brigham & Women"s Genetics 0562 expressed	1	0	0	1	1
NM_177678	Ablim2	actin-binding LIM protein 2	1	0	0	1	1
NM_177707	Stac3	SH3 and cysteine rich domain 3	1	0	0	1	1
NM_177741	Ppp1r3b	protein phosphatase 1, regulatory (inhibitor) subunit 3B	1	0	0	1	1
NM_177744	Apol10a	apolipoprotein L 10a	1	0	0	1	1
NM_177762	Aak1	AP2 associated kinase 1	1	0	0	1	1
NM_177781	Trpa1	transient receptor potential cation channel, subfamily A, member 1	1	0	0	1	1
NM_177784	Klhl23	kelch-like 23 (Drosophila)	1	0	0	1	1
NM_177820	Apol10b	apolipoprotein L 10b	1	0	0	1	1
NM_177838	A230106N23Rik	RIKEN cDNA A230106N23 gene	1	0	0	1	1
NM_177879	Sdk1	sidekick homolog 1 (chicken)	1	0	0	1	1
NM_177887	BC022651	cDNA sequence BC022651	1	0	0	1	1
NM_177900	Hapln4	hyaluronan and proteoglycan link protein 4	1	0	0	1	1
NM_178041	Eif5	eukaryotic translation initiation factor 5	1	0	0	1	1
NM_178045	Rassf4	Ras association (RalGDS/AF-6) domain family member 4	1	0	0	1	1
NM_178244	Teddm1	transmembrane epididymal protein 1	1	0	0	1	1
NM_178259	Abca13	ATP-binding cassette, sub-family A (ABC1), member 13	1	0	0	1	1
NM_178267	Zfp827	zinc finger protein 827	1	0	0	1	1
NM_178377	Commd10	COMM domain containing 10	1	0	0	1	1
NM_178384	Zfp74	zinc finger protein 74	1	0	0	1	1
NM_178396	Car12	carbonic anyhydrase 12	1	0	0	1	1
NM_178398	Wipi2	WD repeat domain, phosphoinositide interacting 2	1	0	0	1	1
NM_178405	Atp1a2	ATPase, Na+/K+ transporting, alpha 2 polypeptide	1	0	0	1	1
NM_178406	Gpr153	G protein-coupled receptor 153	1	0	0	1	1
NM_178411	Zfp334	zinc finger protein 334	1	0	0	1	1
NM_178597	Camk2g	calcium/calmodulin-dependent protein kinase II gamma	1	0	0	1	1
NM_178610	Krr1	KRR1, small subunit (SSU) processome component, homolog (yeast)	1	0	0	1	1
NM_178618	2310040C09Rik	RIKEN cDNA 2310040C09 gene	1	0	0	1	1
NM_178622	Suds3	suppressor of defective silencing 3 homolog (S. cerevisiae)	1	0	0	1	1
NM_178645	Blmh	bleomycin hydrolase	1	0	0	1	1
NM_178656	A530088H08Rik	RIKEN cDNA A530088H08 gene	1	0	0	1	1
NM_178676	Entpd3	ectonucleoside triphosphate diphosphohydrolase 3	1	0	0	1	1
NM_178683	Depdc1b	DEP domain containing 1B	1	0	0	1	1
NM_178684	Mapk1ip1l	mitogen-activated protein kinase 1 interacting protein 1-like	1	0	0	1	1
NM_178693	Coq4	coenzyme Q4 homolog (yeast)	1	0	0	1	1
NM_178694	Zer1	zer-1 homolog (C. elegans)	1	0	0	1	1
NM_178696	Slc25a44	solute carrier family 25, member 44	1	0	0	1	1
NM_178717	Rxfp3	relaxin family peptide receptor 3	1	0	0	1	1
NM_178726	Ppm1l	protein phosphatase 1 (formerly 2C)-like	1	0	0	1	1
NM_178753	Spin4	spindlin family, member 4	1	0	0	1	1
NM_178760	Gpr107	G protein-coupled receptor 107	1	0	0	1	1
NM_178765	5730410E15Rik	RIKEN cDNA 5730410E15 gene	1	0	0	1	1
NM_178772	Aadacl1	arylacetamide deacetylase-like 1	1	0	0	1	1
NM_178793	Ccbe1	collagen and calcium binding EGF domains 1	1	0	0	1	1
NM_178798	Slc7a6	solute carrier family 7 (cationic amino acid transporter, y+ system), member 6	1	0	0	1	1
NM_178801	6030446N20Rik	RIKEN cDNA 6030446N20 gene	1	0	0	1	1
NM_178893	Coro2a	coronin, actin binding protein 2A	1	0	0	1	1
NM_178897	Tyw1	tRNA-yW synthesizing protein 1 homolog (S. cerevisiae)	1	0	0	1	1
NM_178936	Tmem56	transmembrane protein 56	1	0	0	1	1
NM_179203	Atad3a	ATPase family, AAA domain containing 3A	1	0	0	1	1
NM_180960	Nnat	neuronatin	1	0	0	1	1
NM_181074	Lingo1	leucine rich repeat and Ig domain containing 1	1	0	0	1	1
NM_181277	Col14a1	collagen, type XIV, alpha 1	1	0	0	1	1
NM_181278	B230219D22Rik	RIKEN cDNA B230219D22 gene	1	0	0	1	1
NM_181318	Rasgef1b	RasGEF domain family, member 1B	1	0	0	1	1
NM_181325	Slc25a15	solute carrier family 25 (mitochondrial carrier ornithine transporter), member 15	1	0	0	1	1
NM_181326	Zfp521	zinc finger protein 521	1	0	0	1	1
NM_181395	Pxdn	peroxidasin homolog (Drosophila)	1	0	0	1	1
NM_181407	Me3	malic enzyme 3, NADP(+)-dependent, mitochondrial	1	0	0	1	1
NM_181815	4930534B04Rik	RIKEN cDNA 4930534B04 gene	1	0	0	1	1
NM_181853	Trim66	tripartite motif-containing 66	1	0	0	1	1
NM_182694	Ggn	gametogenetin	1	0	0	1	1
NM_182991	Tmem59l	transmembrane protein 59-like	1	0	0	1	1
NM_183019	Arhgef4	Rho guanine nucleotide exchange factor (GEF) 4	1	0	0	1	1
NM_183027	Ap1s3	adaptor-related protein complex AP-1, sigma 3	1	0	0	1	1
NM_183033	Zfp516	zinc finger protein 516	1	0	0	1	1
NM_183148	C79267	expressed sequence C79267	1	0	0	1	1
NM_183151	Mid1	midline 1	1	0	0	1	1
NM_183179	Kcnv2	potassium channel, subfamily V, member 2	1	0	0	1	1
NM_183185	Zfp300	zinc finger protein 300	1	0	0	1	1
NM_183193	Foxi2	forkhead box I2	1	0	0	1	1
NM_183201	Slfn5	schlafen 5	1	0	0	1	1
NM_183262	Stk35	serine/threonine kinase 35	1	0	0	1	1
NM_194268	Onecut2	one cut domain, family member 2	1	0	0	1	1
NM_194334	Tbc1d2b	TBC1 domain family, member 2B	1	0	0	1	1
NM_194341	Ap1gbp1	AP1 gamma subunit binding protein 1	1	0	0	1	1
NM_194343	Trim45	tripartite motif-containing 45	1	0	0	1	1
NM_198004	5133401N09Rik	RIKEN cDNA 5133401N09 gene	1	0	0	1	1
NM_198006	6330578E17Rik	RIKEN cDNA 6330578E17 gene	1	0	0	1	1
NM_198029	Fermt1	fermitin family homolog 1 (Drosophila)	1	0	0	1	1
NM_198035	Zbtb39	zinc finger and BTB domain containing 39	1	0	0	1	1
NM_198091	Usp2	ubiquitin specific peptidase 2	1	0	0	1	1
NM_198092	Usp2	ubiquitin specific peptidase 2	1	0	0	1	1
NM_198103	Exoc8	exocyst complex component 8	1	0	0	1	1
NM_198108	BC023055	cDNA sequence BC023055	1	0	0	1	1
NM_198294	Tanc1	tetratricopeptide repeat, ankyrin repeat and coiled-coil containing 1	1	0	0	1	1
NM_198412	Dnajc6	DnaJ (Hsp40) homolog, subfamily C, member 6	1	0	0	1	1
NM_198417	C030039L03Rik	RIKEN cDNA C030039L03 gene	1	0	0	1	1
NM_198600	Pols	polymerase (DNA directed) sigma	1	0	0	1	1
NM_198616	Ccdc85b	coiled-coil domain containing 85B	1	0	0	1	1
NM_198626	AI480653	expressed sequence AI480653	1	0	0	1	1
NM_198649	Ablim3	actin binding LIM protein family, member 3	1	0	0	1	1
NM_198652	6430706D22Rik	RIKEN cDNA 6430706D22 gene	1	0	0	1	1
NM_198659	B930007M17Rik	RIKEN cDNA B930007M17 gene	1	0	0	1	1
NM_198664	Tbc1d2	TBC1 domain family, member 2	1	0	0	1	1
NM_198937	Hn1l	hematological and neurological expressed 1-like	1	0	0	1	1
NM_199306	Wdtc1	WD and tetratricopeptide repeats 1	1	0	0	1	1
NM_199307	Ece1	endothelin converting enzyme 1	1	0	0	1	1
NM_199323	Tacc1	transforming, acidic coiled-coil containing protein 1	1	0	0	1	1
NM_199476	Rrm2b	ribonucleotide reductase M2 B (TP53 inducible)	1	0	0	1	1
NM_201226	Lrrc47	leucine rich repeat containing 47	1	0	0	1	1
NM_201354	Gm672	gene model 672, (NCBI)	1	0	0	1	1
NM_201358	Lyrm4	LYR motif containing 4	1	0	0	1	1
NM_201368	Xkr8	X Kell blood group precursor related family member 8 homolog	1	0	0	1	1
NM_201406	Pigs	phosphatidylinositol glycan anchor biosynthesis, class S	1	0	0	1	1
NM_201531	Kcnf1	potassium voltage-gated channel, subfamily F, member 1	1	0	0	1	1
NM_203507	Rwdd4a	RWD domain containing 4A	1	0	0	1	1
NM_206974	Kcnrg	potassium channel regulator	1	0	0	1	1
NM_207216	Ugt3a1	UDP glycosyltransferases 3 family, polypeptide A1	1	0	0	1	1
NM_207261	Kcnk18	potassium channel, subfamily K, member 18	1	0	0	1	1
NM_207264	BC052040	cDNA sequence BC052040	1	0	0	1	1
NM_207267	4930488E11Rik	RIKEN cDNA 4930488E11 gene	1	0	0	1	1
NM_207650	Dtna	dystrobrevin alpha	1	0	0	1	1
NM_207654	Efna5	ephrin A5	1	0	0	1	1
NM_207657	5031410I06Rik	RIKEN cDNA 5031410I06 gene	1	0	0	1	1
NM_212435	Foxp2	forkhead box P2	1	0	0	1	1
NM_212446	Psmf1	proteasome (prosome, macropain) inhibitor subunit 1	1	0	0	1	1

## Sheet: miR-181a-5p
# "1" : interaction predicted; "0" : interaction not predicted.
Refseq	Symbol	Description	miranda	mirtarget2	pictar	pita	rnahybrid
NM_001001176	Taf9b	TAF9B RNA polymerase II, TATA box binding protein (TBP)-associated factor	1	1	1	1	1
NM_001001806	Zfp36l2	zinc finger protein 36, C3H type-like 2	1	1	1	1	1
NM_001003671	Pcdhac1	protocadherin alpha subfamily C, 1	1	1	1	1	1
NM_001003672	Pcdhac2	protocadherin alpha subfamily C, 2	1	1	1	1	1
NM_001003717	Osbpl8	oxysterol binding protein-like 8	1	1	1	1	1
NM_001013380	Dync1li2	dynein, cytoplasmic 1 light intermediate chain 2	1	1	1	1	1
NM_001013411	Nkain2	Na+/K+ transporting ATPase interacting 2	1	1	1	1	1
NM_001025560	Sox6	SRY-box containing gene 6	1	1	1	1	1
NM_001031772	Lin28b	lin-28 homolog B (C. elegans)	1	1	1	1	1
NM_001033122	Cd69	CD69 antigen	1	0	0	1	1
NM_001033156	Fbxo33	F-box protein 33	1	1	1	1	1
NM_001038698	Elavl4	ELAV (embryonic lethal, abnormal vision, Drosophila)-like 4 (Hu antigen D)	1	1	1	1	1
NM_001039089	Sel1l	sel-1 suppressor of lin-12-like (C. elegans)	1	1	1	1	1
NM_001039137	Scoc	short coiled-coil protein	1	1	1	1	1
NM_001039388	Wdr37	WD repeat domain 37	1	1	1	1	1
NM_001039474	Tcerg1	transcription elongation regulator 1 (CA150)	1	1	1	1	1
NM_007564	Zfp36l1	zinc finger protein 36, C3H type-like 1	1	1	1	1	1
NM_007566	Birc6	baculoviral IAP repeat-containing 6	1	1	1	1	1
NM_007625	Cbx4	chromobox homolog 4 (Drosophila Pc class)	1	1	1	1	1
NM_007715	Clock	circadian locomoter output cycles kaput	1	1	1	1	1
NM_007766	Pcdha4	protocadherin alpha 4	1	1	1	1	1
NM_007767	Pcdha6	protocadherin alpha 6	1	1	1	1	1
NM_007892	E2f5	E2F transcription factor 5	1	1	1	1	1
NM_007956	Esr1	estrogen receptor 1 (alpha)	1	1	1	1	1
NM_007961	Etv6	ets variant gene 6 (TEL oncogene)	1	1	1	1	1
NM_007966	Evx1	even skipped homeotic gene 1 homolog	1	1	1	1	1
NM_007981	Acsl1	acyl-CoA synthetase long-chain family member 1	1	1	1	1	1
NM_008019	Fkbp1a	FK506 binding protein 1a	1	1	1	1	1
NM_008139	Gnaq	guanine nucleotide binding protein, alpha q polypeptide	1	1	1	1	1
NM_008173	Nr3c1	nuclear receptor subfamily 3, group C, member 1	1	1	1	1	1
NM_008465	Kpna1	karyopherin (importin) alpha 1	1	1	1	1	1
NM_008516	Lrrn1	leucine rich repeat protein 1, neuronal	1	1	1	1	1
NM_008764	Tnfrsf11b	tumor necrosis factor receptor superfamily, member 11b (osteoprotegerin)	1	1	1	1	1
NM_009009	Rad21	RAD21 homolog (S. pombe)	1	1	1	1	1
NM_009183	St8sia4	ST8 alpha-N-acetyl-neuraminide alpha-2,8-sialyltransferase 4	1	1	1	1	1
NM_009223	Snn	stannin	1	1	1	1	1
NM_009575	Zic3	zinc finger protein of the cerebellum 3	1	1	1	1	1
NM_009613	Adam11	a disintegrin and metallopeptidase domain 11	1	1	1	1	1
NM_009621	Adamts1	a disintegrin-like and metallopeptidase (reprolysin type) with thrombospondin type 1 motif, 1	1	1	1	1	1
NM_009622	Adcy1	adenylate cyclase 1	1	1	1	1	1
NM_009627	Adm	adrenomedullin	1	1	1	1	1
NM_009939	Cops2	COP9 (constitutive photomorphogenic) homolog, subunit 2 (Arabidopsis thaliana)	1	1	1	1	1
NM_009952	Creb1	cAMP responsive element binding protein 1	1	1	1	1	1
NM_009957	Pcdha7	protocadherin alpha 7	1	1	1	1	1
NM_009959	Pcdha5	protocadherin alpha 5	1	1	1	1	1
NM_009960	Pcdha11	protocadherin alpha 11	1	1	1	1	1
NM_009961	Pcdha10	protocadherin alpha 10	1	1	1	1	1
NM_010160	Cugbp2	CUG triplet repeat, RNA binding protein 2	1	1	1	1	1
NM_010250	Gabra1	gamma-aminobutyric acid (GABA-A) receptor, subunit alpha 1	1	1	1	1	1
NM_010258	Gata6	GATA binding protein 6	1	1	1	1	1
NM_010450	Hoxa11	homeo box A11	1	1	1	1	1
NM_010488	Elavl4	ELAV (embryonic lethal, abnormal vision, Drosophila)-like 4 (Hu antigen D)	1	1	1	1	1
NM_010516	Cyr61	cysteine rich protein 61	1	1	1	1	1
NM_010554	Il1a	interleukin 1 alpha	1	1	1	1	1
NM_010945	Nsmaf	neutral sphingomyelinase (N-SMase) activation associated factor	1	1	1	1	1
NM_011041	Pax9	paired box gene 9	1	1	1	1	1
NM_011058	Pdgfra	platelet derived growth factor receptor, alpha polypeptide	1	1	1	1	1
NM_011103	Prkcd	protein kinase C, delta	1	1	1	1	1
NM_011344	Sel1l	sel-1 suppressor of lin-12-like (C. elegans)	1	1	1	1	1
NM_011445	Sox6	SRY-box containing gene 6	1	1	1	1	1
NM_011595	Timp3	tissue inhibitor of metalloproteinase 3	1	1	1	1	1
NM_011603	Tbpl1	TATA box binding protein-like 1	1	1	1	1	1
NM_011751	Zfp207	zinc finger protein 207	1	1	1	1	1
NM_011803	Klf6	Kruppel-like factor 6	1	1	1	1	1
NM_011898	Spry4	sprouty homolog 4 (Drosophila)	1	1	1	1	1
NM_011949	Mapk1	mitogen-activated protein kinase 1	1	1	1	1	1
NM_011976	Sema4g	sema domain, immunoglobulin domain (Ig), transmembrane domain (TM) and short cytoplasmic domain, (semaphorin) 4G	1	1	1	1	1
NM_013506	Eif4a2	eukaryotic translation initiation factor 4A2	1	1	1	1	1
NM_013626	Pam	peptidylglycine alpha-amidating monooxygenase	1	1	1	1	1
NM_013880	Plcl2	phospholipase C-like 2	1	1	1	1	1
NM_016678	Reck	reversion-inducing-cysteine-rich protein with kazal motifs	1	1	1	1	1
NM_016716	Cul3	cullin 3	1	1	1	1	1
NM_018871	Ywhag	tyrosine 3-monooxygenase/tryptophan 5-monooxygenase activation protein, gamma polypeptide	1	1	1	1	1
NM_019812	Sirt1	sirtuin 1 (silent mating type information regulation 2, homolog) 1 (S. cerevisiae)	1	1	1	1	1
NM_019978	Dclk1	doublecortin-like kinase 1	1	1	1	1	1
NM_021275	Kcna4	potassium voltage-gated channel, shaker-related subfamily, member 4	1	1	1	1	1
NM_021716	Fign	fidgetin	1	1	1	1	1
NM_021876	Eed	embryonic ectoderm development	1	1	1	1	1
NM_022985	Zfand6	zinc finger, AN1-type domain 6	1	1	1	1	1
NM_023045	Xpo7	exportin 7	1	1	1	1	1
NM_023184	Klf15	Kruppel-like factor 15	1	1	1	1	1
NM_023612	Esm1	endothelial cell-specific molecule 1	1	1	1	1	1
NM_023900	Plekhj1	pleckstrin homology domain containing, family J member 1	1	1	1	1	1
NM_024207	Derl1	Der1-like domain family, member 1	1	1	1	1	1
NM_024457	Rap1b	RAS related protein 1b	1	1	1	1	1
NM_025709	Gapvd1	GTPase activating protein and VPS9 domains 1	1	1	1	1	1
NM_025937	Nkap	NFKB activating protein	1	1	1	1	1
NM_026331	Slc25a37	solute carrier family 25, member 37	1	1	1	1	1
NM_026383	Pnrc2	proline-rich nuclear receptor coactivator 2	1	1	1	1	1
NM_027184	Ipmk	inositol polyphosphate multikinase	1	1	1	1	1
NM_027881	Osbpl3	oxysterol binding protein-like 3	1	1	1	1	1
NM_028108	Nat13	N-acetyltransferase 13	1	1	1	1	1
NM_028459	Wasl	Wiskott-Aldrich syndrome-like (human)	1	1	1	1	1
NM_028487	Gpbp1	GC-rich promoter binding protein 1	1	1	1	1	1
NM_028802	Prei4	preimplantation protein 4	1	1	1	1	1
NM_028862	Rnf145	ring finger protein 145	1	1	1	1	1
NM_029081	5730419I09Rik	RIKEN cDNA 5730419I09 gene	1	1	1	1	1
NM_030138	Centb2	centaurin, beta 2	1	1	1	1	1
NM_030249	Cttnbp2nl	CTTNBP2 N-terminal like	1	1	1	1	1
NM_030564	Rnf34	ring finger protein 34	1	1	1	1	1
NM_030689	Nptxr	neuronal pentraxin receptor	1	1	1	1	1
NM_030695	Lrba	LPS-responsive beige-like anchor	1	1	1	1	1
NM_030706	Trim2	tripartite motif-containing 2	1	1	1	1	1
NM_030732	Tbl1xr1	transducin (beta)-like 1X-linked receptor 1	1	1	1	1	1
NM_054072	Pcdha1	protocadherin alpha 1	1	1	1	1	1
NM_078478	Ghitm	growth hormone inducible transmembrane protein	1	1	1	1	1
NM_133218	Zfp704	zinc finger protein 704	1	1	1	1	1
NM_133247	Usp33	ubiquitin specific peptidase 33	1	1	1	1	1
NM_133815	Lbr	lamin B receptor	1	1	1	1	1
NM_133828	Creb1	cAMP responsive element binding protein 1	1	1	1	1	1
NM_133957	Nfat5	nuclear factor of activated T-cells 5	1	1	1	1	1
NM_138661	Pcdha9	protocadherin alpha 9	1	1	1	1	1
NM_138662	Pcdha3	protocadherin alpha 3	1	1	1	1	1
NM_138663	Pcdha12	protocadherin alpha 12	1	1	1	1	1
NM_138744	Ssx2ip	synovial sarcoma, X breakpoint 2 interacting protein	1	1	1	1	1
NM_145393	Ythdf2	YTH domain family 2	1	1	1	1	1
NM_145534	Btbd3	BTB (POZ) domain containing 3	1	1	1	1	1
NM_145711	Tox	thymocyte selection-associated high mobility group box	1	1	1	1	1
NM_146083	Sfrs7	splicing factor, arginine/serine-rich 7	1	1	1	1	1
NM_146224	Suhw4	suppressor of hairy wing homolog 4 (Drosophila)	1	1	1	1	1
NM_148932	Pom121	nuclear pore membrane protein 121	1	1	1	1	1
NM_153131	Unc5a	unc-5 homolog A (C. elegans)	1	1	1	1	1
NM_172153	Lcorl	ligand dependent nuclear receptor corepressor-like	1	1	1	1	1
NM_172445	Wdr37	WD repeat domain 37	1	1	1	1	1
NM_172555	Papolg	poly(A) polymerase gamma	1	1	1	1	1
NM_172596	Sec24c	SEC24 related gene family, member C (S. cerevisiae)	1	1	1	1	1
NM_172663	Epc2	enhancer of polycomb homolog 2 (Drosophila)	1	1	1	1	1
NM_172677	Ythdf3	YTH domain family 3	1	1	1	1	1
NM_172780	Slc9a6	solute carrier family 9 (sodium/hydrogen exchanger), member 6	1	1	1	1	1
NM_172803	Dock4	dedicator of cytokinesis 4	1	1	1	1	1
NM_172814	Lrp12	low density lipoprotein-related protein 12	1	1	1	1	1
NM_172815	Rspo2	R-spondin 2 homolog (Xenopus laevis)	1	1	1	1	1
NM_172839	Ccnj	cyclin J	1	1	1	1	1
NM_172958	Mtmr12	myotubularin related protein 12	1	1	1	1	1
NM_173451	Arsj	arylsulfatase J	1	1	1	1	1
NM_173760	Hisppd1	histidine acid phosphatase domain containing 1	1	1	1	1	1
NM_174857	Mamdc2	MAM domain containing 2	1	1	1	1	1
NM_175224	Metap1	methionyl aminopeptidase 1	1	1	1	1	1
NM_178609	E2f7	E2F transcription factor 7	1	1	1	1	1
NM_199068	Foxk1	forkhead box K1	1	1	1	1	1
NM_177178	Lmbrd2	LMBR1 domain containing 2	1	1	1	1	1
NM_207515	Mbnl2	muscleblind-like 2	1	1	1	1	1
NM_199028	AK122525	cDNA sequence AK122525	1	1	1	1	1
NM_175642	Bai3	brain-specific angiogenesis inhibitor 3	1	1	1	1	1
NM_178647	Cggbp1	CGG triplet repeat binding protein 1	1	1	1	1	1
NM_178633	Klhl2	kelch-like 2, Mayven (Drosophila)	1	1	1	1	1
NM_178922	Hic2	hypermethylated in cancer 2	1	1	1	1	1
NM_199009	4632419K20Rik	RIKEN cDNA 4632419K20 gene	1	1	1	1	1
NM_198671	Gse1	genetic suppressor element 1	1	1	1	1	1
NM_175489	Osbpl8	oxysterol binding protein-like 8	1	1	1	1	1
NM_178613	4933433P14Rik	RIKEN cDNA 4933433P14 gene	1	1	1	1	1
NM_183144	Inpp5a	inositol polyphosphate-5-phosphatase A	1	1	1	1	1
NM_175341	Mbnl2	muscleblind-like 2	1	1	1	1	1
NM_181585	Pik3r3	phosphatidylinositol 3 kinase, regulatory subunit, polypeptide 3 (p55)	1	1	1	1	1
NM_198117	Pcdha2	protocadherin alpha 2	1	1	1	1	1
NM_201243	Pcdha8	protocadherin alpha 8	1	1	1	1	1
NM_178750	Ss18l1	synovial sarcoma translocation gene on chromosome 18-like 1	1	1	1	1	1
NM_181411	Aftph	aftiphilin	1	1	1	1	1
NM_181404	Kank1	KN motif and ankyrin repeat domains 1	1	1	1	1	1
NM_177718	1600021P15Rik	RIKEN cDNA 1600021P15 gene	1	1	1	1	1
NM_178164	Rod1	ROD1 regulator of differentiation 1 (S. pombe)	1	1	0	1	1
NM_212450	Ctdspl2	CTD (carboxy-terminal domain, RNA polymerase II, polypeptide A) small phosphatase like 2	1	1	0	1	1
NM_177034	Apba1	amyloid beta (A4) precursor protein binding, family A, member 1	1	0	1	1	1
NM_178735	A730069N07Rik	RIKEN cDNA A730069N07 gene	1	1	0	1	1
NM_198703	Wnk1	WNK lysine deficient protein kinase 1	0	1	1	1	1
NM_212446	Psmf1	proteasome (prosome, macropain) inhibitor subunit 1	1	1	0	1	1
NM_178733	Zfp14	zinc finger protein 14	1	1	0	1	1
NM_198937	Hn1l	hematological and neurological expressed 1-like	1	1	0	1	1
NM_198112	Ostn	osteocrin	1	1	0	1	1
NM_177171	Heatr5a	HEAT repeat containing 5A	1	1	0	1	1
NM_178714	Lrfn5	leucine rich repeat and fibronectin type III domain containing 5	1	1	0	1	1
NM_178715	Tmem30b	transmembrane protein 30B	1	1	0	1	1
NM_178701	Lrrc8d	leucine rich repeat containing 8D	1	0	1	1	1
NM_178716	Tnpo1	transportin 1	1	0	1	1	1
NM_177224	Chd9	chromodomain helicase DNA binding protein 9	1	0	1	1	1
NM_178681	Dgkb	diacylglycerol kinase, beta	1	1	0	1	1
NM_198419	Phactr1	phosphatase and actin regulator 1	1	0	1	1	1
NM_182808	C630007B19Rik	RIKEN cDNA C630007B19 gene	1	1	0	1	1
NM_198303	Eif5b	eukaryotic translation initiation factor 5B	1	1	0	1	1
NM_198601	Trim52	tripartite motif-containing 52	1	1	0	1	1
NM_178623	2010005J08Rik	RIKEN cDNA 2010005J08 gene	1	1	0	1	1
NM_178589	Tnfrsf21	tumor necrosis factor receptor superfamily, member 21	1	1	0	1	1
NM_207625	Acsl4	acyl-CoA synthetase long-chain family member 4	1	1	0	1	1
NM_177664	D3Bwg0562e	DNA segment, Chr 3, Brigham & Women"s Genetics 0562 expressed	1	0	1	1	1
NM_177681	Zfp12	zinc finger protein 12	1	1	0	1	1
NM_177687	Crebl2	cAMP responsive element binding protein-like 2	1	1	0	1	1
NM_207245	BC066107	cDNA sequence BC066107	1	1	0	1	1
NM_177712	C330011K17Rik	RIKEN cDNA C330011K17 gene	1	1	0	1	1
NM_199299	Phf15	PHD finger protein 15	1	1	0	1	1
NM_201370	Wee2	WEE1 homolog 2 (S. pombe)	1	1	0	1	1
NM_178116	Camta2	calmodulin binding transcription activator 2	1	1	0	1	1
NM_207222	Lmo3	LIM domain only 3	1	1	0	1	1
NM_177751	Cnksr2	connector enhancer of kinase suppressor of Ras 2	1	0	1	1	1
NM_178047	Prom2	prominin 2	1	1	0	1	1
NM_177781	Trpa1	transient receptor potential cation channel, subfamily A, member 1	1	1	0	1	1
NM_177653	F830045P16Rik	RIKEN cDNA F830045P16 gene	1	1	0	1	1
NM_207636	Fndc3a	fibronectin type III domain containing 3a	1	0	1	1	1
NM_177561	Usp46	ubiquitin specific peptidase 46	1	1	0	1	1
NM_178576	Cpsf4	cleavage and polyadenylation specific factor 4	1	1	0	1	1
NM_178446	Rbm47	RNA binding motif protein 47	1	0	1	1	1
NM_178417	BC050078	cDNA sequence BC050078	1	1	0	1	1
NM_177578	A430090E18Rik	RIKEN cDNA A430090E18 gene	1	1	0	1	1
NM_199021	Dpp10	dipeptidylpeptidase 10	1	0	1	1	1
NM_199024	Nol4	nucleolar protein 4	1	0	1	1	1
NM_207686	Elavl2	ELAV (embryonic lethal, abnormal vision, Drosophila)-like 2 (Hu antigen B)	1	0	1	1	1
NM_177596	EG210853	predicted gene, EG210853	1	1	0	1	1
NM_207685	Elavl2	ELAV (embryonic lethal, abnormal vision, Drosophila)-like 2 (Hu antigen B)	1	0	1	1	1
NM_207681	Bcl2l11	BCL2-like 11 (apoptosis facilitator)	1	0	1	1	1
NM_207680	Bcl2l11	BCL2-like 11 (apoptosis facilitator)	1	0	1	1	1
NM_199056	Ippk	inositol 1,3,4,5,6-pentakisphosphate 2-kinase	1	1	0	1	1
NM_201364	BC055324	cDNA sequence BC055324	1	1	0	1	1
NM_175434	Slc35f3	solute carrier family 35, member F3	1	1	0	1	1
NM_181317	Kcns2	K+ voltage-gated channel, subfamily S, 2	1	1	0	1	1
NM_175549	Robo2	roundabout homolog 2 (Drosophila)	1	1	0	1	1
NM_175550	Ap4e1	adaptor-related protein complex AP-4, epsilon 1	1	1	0	1	1
NM_183029	Igf2bp2	insulin-like growth factor 2 mRNA binding protein 2	1	0	1	1	1
NM_194268	Onecut2	one cut domain, family member 2	1	1	0	1	1
NM_183173	Ankrd43	ankyrin repeat domain 43	1	1	0	1	1
NM_183027	Ap1s3	adaptor-related protein complex AP-1, sigma 3	1	1	0	1	1
NM_194355	Spire1	spire homolog 1 (Drosophila)	1	1	0	1	1
NM_178872	Trim36	tripartite motif-containing 36	1	1	0	1	1
NM_178875	8430426H19Rik	RIKEN cDNA 8430426H19 gene	1	1	0	1	1
NM_175485	Prtg	protogenin homolog (Gallus gallus)	1	1	0	1	1
NM_175425	C1qtnf7	C1q and tumor necrosis factor related protein 7	1	1	0	1	1
NM_178854	Cnot6l	CCR4-NOT transcription complex, subunit 6-like	1	1	0	1	1
NM_183158	Cyp2ab1	cytochrome P450, family 2, subfamily ab, polypeptide 1	1	1	0	1	1
NM_178883	Scyl1bp1	SCY1-like 1 binding protein 1	1	1	0	1	1
NM_175392	5730472N09Rik	RIKEN cDNA 5730472N09 gene	1	0	1	1	1
NM_181071	Tanc2	tetratricopeptide repeat, ankyrin repeat and coiled-coil containing 2	1	1	0	1	1
NM_181266	Zfp120	zinc finger protein 120	1	1	0	1	1
NM_181650	Prdm4	PR domain containing 4	1	1	0	1	1
NM_176832	Spire1	spire homolog 1 (Drosophila)	1	1	0	1	1
NM_178759	Timd4	T-cell immunoglobulin and mucin domain containing 4	1	1	0	1	1
NM_175523	Ppm1k	protein phosphatase 1K (PP2C domain containing)	1	1	0	1	1
NM_175279	Rassf10	Ras association (RalGDS/AF-6) domain family (N-terminal) member 10	1	0	1	1	1
NM_177358	A630033E08Rik	RIKEN cDNA A630033E08 gene	1	1	0	1	1
NM_175752	Chn1	chimerin (chimaerin) 1	1	0	1	1	1
NM_197989	1810009O10Rik	RIKEN cDNA 1810009O10 gene	1	1	0	1	1
NM_178749	Stk32a	serine/threonine kinase 32A	1	1	0	1	1
NM_182994	Arl5a	ADP-ribosylation factor-like 5A	1	0	1	1	1
NM_175606	Hopx	HOP homeobox	1	1	0	1	1
NM_001001152	Zfp458	zinc finger protein 458	1	1	0	1	1
NM_001001180	BC066028	cDNA sequence BC066028	1	1	0	1	1
NM_001001182	Baz2b	bromodomain adjacent to zinc finger domain, 2B	0	1	1	1	1
NM_001001321	Slc35d2	solute carrier family 35, member D2	1	1	0	1	1
NM_001001798	Atp11c	Atpase, class VI, type 11C	1	0	1	1	1
NM_001003899	Tardbp	TAR DNA binding protein	1	1	0	1	1
NM_001003960	Dnmt3b	DNA methyltransferase 3B	1	1	0	1	1
NM_001003961	Dnmt3b	DNA methyltransferase 3B	1	1	0	1	1
NM_001003963	Dnmt3b	DNA methyltransferase 3B	1	1	0	1	1
NM_001004139	Zfp619	zinc finger protein 619	1	1	0	1	1
NM_001004185	Whdc1	WAS protein homology region 2 domain containing 1	1	1	0	1	1
NM_001005358	BC018101	cDNA sequence BC018101	1	1	0	1	1
NM_001005419	Ado	2-aminoethanethiol (cysteamine) dioxygenase	1	0	1	1	1
NM_001005740	Phactr1	phosphatase and actin regulator 1	1	0	1	1	1
NM_001005748	Phactr1	phosphatase and actin regulator 1	1	0	1	1	1
NM_001007576	Gucy2f	guanylate cyclase 2f	1	1	0	1	1
NM_001008427	EG434179	predicted gene, EG434179	1	1	0	1	1
NM_001008545	Tardbp	TAR DNA binding protein	1	1	0	1	1
NM_001008546	Tardbp	TAR DNA binding protein	1	1	0	1	1
NM_001011800	Olfr212	olfactory receptor 212	1	1	0	1	1
NM_001013360	Npcd	neuronal pentraxin with chromo domain	1	1	0	1	1
NM_001013362	Npcd	neuronal pentraxin with chromo domain	1	1	0	1	1
NM_001013381	Rsad1	radical S-adenosyl methionine domain containing 1	1	1	0	1	1
NM_001013806	Ankrd13c	ankyrin repeat domain 13c	0	1	1	1	1
NM_001024726	Zfp607	zinc finger proten 607	1	1	0	1	1
NM_001024837	Adarb1	adenosine deaminase, RNA-specific, B1	1	1	0	1	1
NM_001025093	Atf2	activating transcription factor 2	1	0	1	1	1
NM_001025192	Cxadr	coxsackievirus and adenovirus receptor	1	1	0	1	1
NM_001025431	Btbd3	BTB (POZ) domain containing 3	0	1	1	1	1
NM_001025584	Kcnj6	potassium inwardly-rectifying channel, subfamily J, member 6	1	1	0	1	1
NM_001033257	Phactr2	phosphatase and actin regulator 2	1	1	0	1	1
NM_001033313	Pdap1	PDGFA associated protein 1	1	1	0	1	1
NM_001033347	D430041D05Rik	RIKEN cDNA D430041D05 gene	1	1	0	1	1
NM_001034857	C330019L16Rik	RIKEN cDNA C330019L16 gene	1	1	0	1	1
NM_001034860	EG229571	predicted gene, EG229571	1	1	0	1	1
NM_001034893	EG435970	predicted gene, EG435970	1	1	0	1	1
NM_001035532	Akap2	A kinase (PRKA) anchor protein 2	1	1	0	1	1
NM_001035533	Akap2	A kinase (PRKA) anchor protein 2	1	1	0	1	1
NM_001037099	Cacnb4	calcium channel, voltage-dependent, beta 4 subunit	1	0	1	1	1
NM_001037863	Atp11c	Atpase, class VI, type 11C	1	0	1	1	1
NM_001038607	Kcnh1	potassium voltage-gated channel, subfamily H (eag-related), member 1	1	1	0	1	1
NM_001038637	Gng2	guanine nucleotide binding protein (G protein), gamma 2	1	0	1	1	1
NM_001038642	Ets1	E26 avian leukemia oncogene 1, 5" domain	1	0	1	1	1
NM_001038999	Atp8a1	ATPase, aminophospholipid transporter (APLT), class I, type 8A, member 1	1	0	1	1	1
NM_001039080	Rbms2	RNA binding motif, single stranded interacting protein 2	1	1	0	1	1
NM_001039088	Seh1l	SEH1-like (S. cerevisiae	1	1	0	1	1
NM_001039094	Negr1	neuronal growth regulator 1	1	0	1	1	1
NM_001039195	Gria2	glutamate receptor, ionotropic, AMPA2 (alpha 2)	1	0	1	1	1
NM_001039543	Mlf1	myeloid leukemia factor 1	1	1	0	1	1
NM_001042503	Trim71	tripartite motif-containing 71	1	1	0	1	1
NM_001042565	Wsb1	WD repeat and SOCS box-containing 1	1	1	0	1	1
NM_001042660	Smad7	MAD homolog 7 (Drosophila)	1	1	0	1	1
NM_001042671	Prei4	preimplantation protein 4	1	1	0	1	1
NM_001045486	Zfp180	zinc finger protein 180	1	1	0	1	1
NM_001045529	Morc3	microrchidia 3	1	1	0	1	1
NM_001076676	Usp33	ubiquitin specific peptidase 33	1	1	0	1	1
NM_001076681	1810012P15Rik	RIKEN cDNA 1810012P15 gene	1	1	0	1	1
NM_001077354	C77370	expressed sequence C77370	1	1	0	1	1
NM_001077695	Ncoa2	nuclear receptor coactivator 2	1	1	0	1	1
NM_001078167	Sfrs1	splicing factor, arginine/serine-rich 1 (ASF/SF2)	1	1	0	1	1
NM_001080794	G3bp2	GTPase activating protein (SH3 domain) binding protein 2	1	1	0	1	1
NM_001080796	G3bp2	GTPase activating protein (SH3 domain) binding protein 2	1	1	0	1	1
NM_001080948	Larp4	La ribonucleoprotein domain family, member 4	1	1	0	1	1
NM_001081013	Rlf	rearranged L-myc fusion sequence	1	1	0	1	1
NM_001081049	Mll1	myeloid/lymphoid or mixed-lineage leukemia 1	1	1	0	1	1
NM_001081071	Lycat	lysocardiolipin acyltransferase	1	1	0	1	1
NM_001081073	Cep76	centrosomal protein 76	1	1	0	1	1
NM_001081079	Ogfrl1	opioid growth factor receptor-like 1	1	1	0	1	1
NM_001081113	Ipo8	importin 8	1	1	0	1	1
NM_001081150	Lonrf1	LON peptidase N-terminal domain and ring finger 1	1	1	0	1	1
NM_001081176	Polr3g	polymerase (RNA) III (DNA directed) polypeptide G	1	1	0	1	1
NM_001081193	Lemd3	LEM domain containing 3	1	1	0	1	1
NM_001081205	Npal1	NIPA-like domain containing 1	1	1	0	1	1
NM_001081225	6030443O07Rik	RIKEN cDNA 6030443O07 gene	1	1	0	1	1
NM_001081229	Tsc22d2	TSC22 domain family 2	1	1	0	1	1
NM_001081238	Palb2	partner and localizer of BRCA2	1	1	0	1	1
NM_001081276	Clasp1	CLIP associating protein 1	1	1	0	1	1
NM_001081278	Tbc1d4	TBC1 domain family, member 4	1	1	0	1	1
NM_001081282	Ibtk	inhibitor of Bruton agammaglobulinemia tyrosine kinase	1	1	0	1	1
NM_001081288	Taf2	TAF2 RNA polymerase II, TATA box binding protein (TBP)-associated factor	1	1	0	1	1
NM_001081304	Atf6	activating transcription factor 6	1	1	0	1	1
NM_001081326	Agl	amylo-1,6-glucosidase, 4-alpha-glucanotransferase	1	1	0	1	1
NM_001081337	Sipa1l2	signal-induced proliferation-associated 1 like 2	1	1	0	1	1
NM_001081409	Phf20l1	PHD finger protein 20-like 1	1	1	0	1	1
NM_001081414	Grm5	glutamate receptor, metabotropic 5	1	1	0	1	1
NM_001081426	Dip2c	DIP2 disco-interacting protein 2 homolog C (Drosophila)	1	1	0	1	1
NM_001081473	Zxdb	zinc finger, X-linked, duplicated B	1	1	0	1	1
NM_001081678	Zfp800	zinc finger protein 800	1	1	0	1	1
NM_007396	Acvr2a	activin receptor IIA	1	0	1	1	1
NM_007437	Aldh3a2	aldehyde dehydrogenase family 3, subfamily A2	1	1	0	1	1
NM_007466	Api5	apoptosis inhibitor 5	1	0	1	1	1
NM_007488	Arnt2	aryl hydrocarbon receptor nuclear translocator 2	1	0	1	1	1
NM_007513	Slc7a1	solute carrier family 7 (cationic amino acid transporter, y+ system), member 1	1	1	0	1	1
NM_007521	Bach2	BTB and CNC homology 2	1	0	1	1	1
NM_007528	Bcl6b	B-cell CLL/lymphoma 6, member B	1	1	0	1	1
NM_007549	Blk	B lymphoid kinase	1	1	0	1	1
NM_007568	Btc	betacellulin, epidermal growth factor family member	1	1	0	1	1
NM_007577	C5ar1	complement component 5a receptor 1	1	1	0	1	1
NM_007672	Cdr2	cerebellar degeneration-related 2	1	1	0	1	1
NM_007726	Cnr1	cannabinoid receptor 1 (brain)	1	0	1	1	1
NM_007730	Col12a1	collagen, type XII, alpha 1	1	1	0	1	1
NM_007824	Cyp7a1	cytochrome P450, family 7, subfamily a, polypeptide 1	1	1	0	1	1
NM_007872	Dnmt3a	DNA methyltransferase 3A	1	1	0	1	1
NM_007887	Dub1	deubiquitinating enzyme 1	1	1	0	1	1
NM_007901	S1pr1	sphingosine-1-phosphate receptor 1	1	1	0	1	1
NM_007937	Epha5	Eph receptor A5	1	1	0	1	1
NM_007945	Eps8	epidermal growth factor receptor pathway substrate 8	1	0	1	1	1
NM_007950	Ereg	epiregulin	1	1	0	1	1
NM_008008	Fgf7	fibroblast growth factor 7	1	1	0	1	1
NM_008068	Gabra6	gamma-aminobutyric acid (GABA-A) receptor, subunit alpha 6	1	1	0	1	1
NM_008098	Mtpn	myotrophin	1	0	1	1	1
NM_008199	H2-Bl	histocompatibility 2, blastocyst	1	1	0	1	1
NM_008226	Hcn2	hyperpolarization-activated, cyclic nucleotide-gated K+ 2	1	0	1	1	1
NM_008240	Foxj1	forkhead box J1	1	1	0	1	1
NM_008252	Hmgb2	high mobility group box 2	1	1	0	1	1
NM_008278	Hpgd	hydroxyprostaglandin dehydrogenase 15 (NAD)	1	1	0	1	1
NM_008298	Dnaja1	DnaJ (Hsp40) homolog, subfamily A, member 1	1	1	0	1	1
NM_008371	Il7	interleukin 7	1	1	0	1	1
NM_008379	Kpnb1	karyopherin (importin) beta 1	1	0	1	1	1
NM_008396	Itga2	integrin alpha 2	1	1	0	1	1
NM_008501	Lif	leukemia inhibitory factor	1	0	1	1	1
NM_008559	Mc1r	melanocortin 1 receptor	1	1	0	1	1
NM_008596	Sypl2	synaptophysin-like 2	1	0	1	1	1
NM_008600	Mip	major intrinsic protein of eye lens fiber	1	0	1	1	1
NM_008634	Mtap1b	microtubule-associated protein 1B	1	1	0	1	1
NM_008636	Mtf1	metal response element binding transcription factor 1	1	0	1	1	1
NM_008651	Mybl1	myeloblastosis oncogene-like 1	1	1	0	1	1
NM_008678	Ncoa2	nuclear receptor coactivator 2	1	1	0	1	1
NM_008702	Nlk	nemo like kinase	1	0	1	1	1
NM_008710	Nnt	nicotinamide nucleotide transhydrogenase	1	1	0	1	1
NM_008772	P2ry1	purinergic receptor P2Y, G-protein coupled 1	1	1	0	1	1
NM_008888	Phox2b	paired-like homeobox 2b	1	0	1	1	1
NM_008942	Npepps	aminopeptidase puromycin sensitive	0	1	1	1	1
NM_008960	Pten	phosphatase and tensin homolog	1	1	0	1	1
NM_009011	Rad23b	RAD23b homolog (S. cerevisiae)	1	1	0	1	1
NM_009028	Rasl2-9	RAS-like, family 2, locus 9	1	0	1	1	1
NM_009031	Rbbp7	retinoblastoma binding protein 7	1	0	1	1	1
NM_009035	Rbpj	recombination signal binding protein for immunoglobulin kappa J region	1	0	1	1	1
NM_009127	Scd1	stearoyl-Coenzyme A desaturase 1	1	1	0	1	1
NM_009145	Nptn	neuroplastin	1	0	1	1	1
NM_009182	St8sia3	ST8 alpha-N-acetyl-neuraminide alpha-2,8-sialyltransferase 3	1	1	0	1	1
NM_009230	Soat1	sterol O-acyltransferase 1	1	1	0	1	1
NM_009285	Stc1	stanniocalcin 1	1	1	0	1	1
NM_009344	Phlda1	pleckstrin homology-like domain, family A, member 1	1	0	1	1	1
NM_009364	Tfpi2	tissue factor pathway inhibitor 2	1	1	0	1	1
NM_009369	Tgfbi	transforming growth factor, beta induced	1	1	0	1	1
NM_009370	Tgfbr1	transforming growth factor, beta receptor I	1	1	0	1	1
NM_009395	Tnfaip1	tumor necrosis factor, alpha-induced protein 1 (endothelial)	1	1	0	1	1
NM_009425	Tnfsf10	tumor necrosis factor (ligand) superfamily, member 10	1	1	0	1	1
NM_009456	Ube2l3	ubiquitin-conjugating enzyme E2L 3	1	1	0	1	1
NM_009458	Ube2b	ubiquitin-conjugating enzyme E2B, RAD6 homology (S. cerevisiae)	1	1	0	1	1
NM_009481	Usp9x	ubiquitin specific peptidase 9, X chromosome	1	1	0	1	1
NM_009512	Slc27a5	solute carrier family 27 (fatty acid transporter), member 5	1	1	0	1	1
NM_009542	Zfp101	zinc finger protein 101	1	1	0	1	1
NM_009551	Zfand5	zinc finger, AN1-type domain 5	1	0	1	1	1
NM_009574	Zic2	zinc finger protein of the cerebellum 2	1	1	0	1	1
NM_009649	Akap2	A kinase (PRKA) anchor protein 2	1	1	0	1	1
NM_009665	Amd1	S-adenosylmethionine decarboxylase 1	1	1	0	1	1
NM_009715	Atf2	activating transcription factor 2	1	0	1	1	1
NM_009721	Atp1b1	ATPase, Na+/K+ transporting, beta 1 polypeptide	1	0	1	1	1
NM_009727	Atp8a1	ATPase, aminophospholipid transporter (APLT), class I, type 8A, member 1	1	0	1	1	1
NM_009741	Bcl2	B-cell leukemia/lymphoma 2	1	0	0	1	1
NM_009754	Bcl2l11	BCL2-like 11 (apoptosis facilitator)	1	0	1	1	1
NM_009790	Calm1	calmodulin 1	1	1	0	1	1
NM_009806	Cask	calcium/calmodulin-dependent serine protein kinase (MAGUK family)	1	0	1	1	1
NM_009821	Runx1	runt related transcription factor 1	1	1	0	1	1
NM_009847	Cd2ap	CD2-associated protein	1	1	0	1	1
NM_009863	Cdc7	cell division cycle 7 (S. cerevisiae)	1	1	0	1	1
NM_009906	Tpp1	tripeptidyl peptidase I	1	1	0	1	1
NM_009955	Dpysl2	dihydropyrimidinase-like 2	0	1	1	1	1
NM_009994	Cyp1b1	cytochrome P450, family 1, subfamily b, polypeptide 1	1	1	0	1	1
NM_010003	Cyp2c39	cytochrome P450, family 2, subfamily c, polypeptide 39	1	1	0	1	1
NM_010007	Cyp2j5	cytochrome P450, family 2, subfamily j, polypeptide 5	1	1	0	1	1
NM_010068	Dnmt3b	DNA methyltransferase 3B	1	1	0	1	1
NM_010103	Edil3	EGF-like repeats and discoidin I-like domains 3	1	1	0	1	1
NM_010133	En1	engrailed 1	1	1	0	1	1
NM_010134	En2	engrailed 2	1	0	1	1	1
NM_010164	Eya1	eyes absent 1 homolog (Drosophila)	1	0	1	1	1
NM_010212	Fhl2	four and a half LIM domains 2	1	1	0	1	1
NM_010234	Fos	FBJ osteosarcoma oncogene	1	0	1	1	1
NM_010242	Fut4	fucosyltransferase 4	1	1	0	1	1
NM_010243	Fut9	fucosyltransferase 9	1	1	0	1	1
NM_010264	Nr6a1	nuclear receptor subfamily 6, group A, member 1	1	1	0	1	1
NM_010298	Glrb	glycine receptor, beta subunit	1	1	0	1	1
NM_010315	Gng2	guanine nucleotide binding protein (G protein), gamma 2	1	0	1	1	1
NM_010345	Grb10	growth factor receptor bound protein 10	1	1	0	1	1
NM_010407	Hck	hemopoietic cell kinase	1	1	0	1	1
NM_010449	Hoxa1	homeo box A1	1	1	0	1	1
NM_010459	Hoxb4	homeo box B4	1	1	0	1	1
NM_010472	Hrb	HIV-1 Rev binding protein	1	0	1	1	1
NM_010476	Hsd17b7	hydroxysteroid (17-beta) dehydrogenase 7	1	1	0	1	1
NM_010486	Elavl2	ELAV (embryonic lethal, abnormal vision, Drosophila)-like 2 (Hu antigen B)	1	0	1	1	1
NM_010497	Idh1	isocitrate dehydrogenase 1 (NADP+), soluble	1	1	0	1	1
NM_010600	Kcnh1	potassium voltage-gated channel, subfamily H (eag-related), member 1	1	1	0	1	1
NM_010631	Kifc3	kinesin family member C3	1	1	0	1	1
NM_010714	Lhx9	LIM homeobox protein 9	1	0	1	1	1
NM_010728	Lox	lysyl oxidase	0	1	1	1	1
NM_010795	Mgat3	mannoside acetylglucosaminyltransferase 3	1	1	0	1	1
NM_010796	Mgl1	macrophage galactose N-acetyl-galactosamine specific lectin 1	1	1	0	1	1
NM_010801	Mlf1	myeloid leukemia factor 1	1	1	0	1	1
NM_010804	Mllt10	myeloid/lymphoid or mixed-lineage leukemia (trithorax homolog, Drosophila); translocated to, 10	1	1	0	1	1
NM_010848	Myb	myeloblastosis oncogene	1	1	0	1	1
NM_011151	Ppm1b	protein phosphatase 1B, magnesium dependent, beta isoform	1	1	0	1	1
NM_011166	Prl6a1	prolactin family 6, subfamily a, member 1	1	1	0	1	1
NM_011173	Pros1	protein S (alpha)	1	1	0	1	1
NM_011179	Psap	prosaposin	1	0	1	1	1
NM_011274	C80913	expressed sequence C80913	1	1	0	1	1
NM_011326	Scnn1g	sodium channel, nonvoltage-gated 1 gamma	1	1	0	1	1
NM_011334	Clcn4-2	chloride channel 4-2	1	1	0	1	1
NM_011376	Sim1	single-minded homolog 1 (Drosophila)	1	1	0	1	1
NM_011380	Six2	sine oculis-related homeobox 2 homolog (Drosophila)	1	0	1	1	1
NM_011406	Slc8a1	solute carrier family 8 (sodium/calcium exchanger), member 1	1	1	0	1	1
NM_011444	Sox5	SRY-box containing gene 5	1	0	1	1	1
NM_011495	Plk4	polo-like kinase 4 (Drosophila)	1	1	0	1	1
NM_011496	Aurkb	aurora kinase B	1	1	0	1	1
NM_011584	Nr1d2	nuclear receptor subfamily 1, group D, member 2	1	0	1	1	1
NM_011613	Tnfsf11	tumor necrosis factor (ligand) superfamily, member 11	1	0	1	1	1
NM_011626	Tmem165	transmembrane protein 165	1	1	0	1	1
NM_011661	Tyr	tyrosinase	1	1	0	1	1
NM_011699	Lin7c	lin-7 homolog C (C. elegans)	1	0	1	1	1
NM_011729	Ercc5	excision repair cross-complementing rodent repair deficiency, complementation group 5	1	1	0	1	1
NM_011748	Zfp14	zinc finger protein 14	1	1	0	1	1
NM_011749	Zfp148	zinc finger protein 148	1	0	1	1	1
NM_011765	Zfp97	zinc finger protein 97	1	1	0	1	1
NM_011782	Adamts5	a disintegrin-like and metallopeptidase (reprolysin type) with thrombospondin type 1 motif, 5 (aggrecanase-2)	1	1	0	1	1
NM_011785	Akt3	thymoma viral proto-oncogene 3	1	0	1	1	1
NM_011808	Ets1	E26 avian leukemia oncogene 1, 5" domain	1	0	1	1	1
NM_011816	G3bp2	GTPase activating protein (SH3 domain) binding protein 2	1	1	0	1	1
NM_011873	Dazap2	DAZ associated protein 2	0	1	1	1	1
NM_011992	Rcn2	reticulocalbin 2	1	1	0	1	1
NM_012051	Etv3	ets variant gene 3	1	0	1	1	1
NM_013488	Cd4	CD4 antigen	1	0	1	1	1
NM_013540	Gria2	glutamate receptor, ionotropic, AMPA2 (alpha 2)	1	0	1	1	1
NM_013551	Hmbs	hydroxymethylbilane synthase	1	1	0	1	1
NM_013556	Hprt1	hypoxanthine guanine phosphoribosyl transferase 1	1	1	0	1	1
NM_013693	Tnf	tumor necrosis factor	1	1	0	1	1
NM_013788	Peg12	paternally expressed 12	1	1	0	1	1
NM_013795	Atp5l	ATP synthase, H+ transporting, mitochondrial F0 complex, subunit g	1	1	0	1	1
NM_013827	Mtf2	metal response element binding transcription factor 2	1	1	0	1	1
NM_013860	Limd1	LIM domains containing 1	1	1	0	1	1
NM_013917	Pttg1	pituitary tumor-transforming 1	1	1	0	1	1
NM_013923	Rnf19a	ring finger protein 19A	1	1	0	1	1
NM_013928	Schip1	schwannomin interacting protein 1	1	0	1	1	1
NM_015737	Galnt4	UDP-N-acetyl-alpha-D-galactosamine:polypeptide N-acetylgalactosaminyltransferase 4	1	1	0	1	1
NM_015753	Zeb2	zinc finger E-box binding homeobox 2	1	1	0	1	1
NM_015767	Ttpa	tocopherol (alpha) transfer protein	1	1	0	1	1
NM_015775	Tmprss2	transmembrane protease, serine 2	1	1	0	1	1
NM_015805	Atp9b	ATPase, class II, type 9B	1	1	0	1	1
NM_015822	Fbxl3	F-box and leucine-rich repeat protein 3	1	1	0	1	1
NM_016670	Pknox1	Pbx/knotted 1 homeobox	1	1	0	1	1
NM_016689	Aqp3	aquaporin 3	1	1	0	1	1
NM_016771	Sult1d1	sulfotransferase family 1D, member 1	1	1	0	1	1
NM_016854	Ppp1r3c	protein phosphatase 1, regulatory (inhibitor) subunit 3C	1	1	0	1	1
NM_016858	Rab33b	RAB33B, member of RAS oncogene family	1	1	0	1	1
NM_016917	Slc40a1	solute carrier family 40 (iron-regulated transporter), member 1	1	1	0	1	1
NM_017382	Rab11a	RAB11a, member RAS oncogene family	1	1	0	1	1
NM_017471	Pbsn	probasin	1	1	0	1	1
NM_018810	Mkrn1	makorin, ring finger protein, 1	1	1	0	1	1
NM_019437	Rfk	riboflavin kinase	1	1	0	1	1
NM_019477	Acsl4	acyl-CoA synthetase long-chain family member 4	1	1	0	1	1
NM_019550	Ptbp2	polypyrimidine tract binding protein 2	1	1	0	1	1
NM_019651	Ptpn9	protein tyrosine phosphatase, non-receptor type 9	0	1	1	1	1
NM_019653	Wsb1	WD repeat and SOCS box-containing 1	1	1	0	1	1
NM_019708	Scoc	short coiled-coil protein	0	1	1	1	1
NM_019711	Rbms2	RNA binding motif, single stranded interacting protein 2	1	1	0	1	1
NM_019827	Gsk3b	glycogen synthase kinase 3 beta	1	0	1	1	1
NM_019948	Clec4e	C-type lectin domain family 4, member e	1	1	0	1	1
NM_020007	Mbnl1	muscleblind-like 1 (Drosophila)	1	1	0	1	1
NM_020601	Tbl1x	transducin (beta)-like 1 X-linked	0	1	1	1	1
NM_022027	Syne1	synaptic nuclear envelope 1	1	1	0	1	1
NM_022305	B4galt1	UDP-Gal:betaGlcNAc beta 1,4- galactosyltransferase, polypeptide 1	1	0	1	1	1
NM_022378	Foxb1	forkhead box B1	1	0	1	1	1
NM_022813	Scamp2	secretory carrier membrane protein 2	1	0	1	1	1
NM_023116	Cacnb2	calcium channel, voltage-dependent, beta 2 subunit	1	1	0	1	1
NM_023266	Zfp120	zinc finger protein 120	1	1	0	1	1
NM_023579	Ipo5	importin 5	1	0	1	1	1
NM_023635	Rab27a	RAB27A, member RAS oncogene family	1	1	0	1	1
NM_023876	Elp4	elongation protein 4 homolog (S. cerevisiae)	1	0	1	1	1
NM_024190	Chmp1b	chromatin modifying protein 1B	1	1	0	1	1
NM_024459	Ppp3r1	protein phosphatase 3, regulatory subunit B, alpha isoform (calcineurin B, type I)	0	1	1	1	1
NM_025682	Pspc1	paraspeckle protein 1	1	0	1	1	1
NM_025722	4921524J17Rik	RIKEN cDNA 4921524J17 gene	0	1	1	1	1
NM_025729	Map3k7ip3	mitogen-activated protein kinase kinase kinase 7 interacting protein 3	1	0	1	1	1
NM_025800	Ppp1r2	protein phosphatase 1, regulatory (inhibitor) subunit 2	1	1	0	1	1
NM_025948	Lsm14a	LSM14 homolog A (SCD6, S. cerevisiae)	1	1	0	1	1
NM_025949	Rps6ka6	ribosomal protein S6 kinase polypeptide 6	1	0	1	1	1
NM_025961	Gatm	glycine amidinotransferase (L-arginine:glycine amidinotransferase)	0	1	1	1	1
NM_026082	Dock7	dedicator of cytokinesis 7	0	1	1	1	1
NM_026201	Ccar1	cell division cycle and apoptosis regulator 1	1	1	0	1	1
NM_026228	Slc39a8	solute carrier family 39 (metal ion transporter), member 8	1	1	0	1	1
NM_026348	Itgb3bp	integrin beta 3 binding protein (beta3-endonexin)	1	1	0	1	1
NM_026377	6330577E15Rik	RIKEN cDNA 6330577E15 gene	1	1	0	1	1
NM_026409	Ddx55	DEAD (Asp-Glu-Ala-Asp) box polypeptide 55	1	1	0	1	1
NM_026417	Yipf4	Yip1 domain family, member 4	1	1	0	1	1
NM_026440	Rnmt	RNA (guanine-7-) methyltransferase	1	1	0	1	1
NM_026556	Dynll2	dynein light chain LC8-type 2	1	1	0	1	1
NM_026574	Inoc1	INO80 complex homolog 1 (S. cerevisiae)	1	0	1	1	1
NM_026577	Arl13b	ADP-ribosylation factor-like 13B	1	1	0	1	1
NM_026629	2410066E13Rik	RIKEN cDNA 2410066E13 gene	1	1	0	1	1
NM_026647	Zdhhc21	zinc finger, DHHC domain containing 21	1	1	0	1	1
NM_026719	Lmbrd1	LMBR1 domain containing 1	1	1	0	1	1
NM_026734	Tmem126b	transmembrane protein 126B	1	1	0	1	1
NM_026887	Ap1s2	adaptor-related protein complex 1, sigma 2 subunit	1	1	0	1	1
NM_027016	Sec62	SEC62 homolog (S. cerevisiae)	1	1	0	1	1
NM_027045	Gcap14	granule cell antiserum positive 14	1	0	1	1	1
NM_027130	Afg3l2	AFG3(ATPase family gene 3)-like 2 (yeast)	1	1	0	1	1
NM_027238	1810054D07Rik	RIKEN cDNA 1810054D07 gene	1	1	0	1	1
NM_027301	Rdh20	retinol dehydrogenase 20	1	1	0	1	1
NM_027321	Lrrc39	leucine rich repeat containing 39	1	1	0	1	1
NM_027373	Afap1	actin filament associated protein 1	1	1	0	1	1
NM_027434	2610304G08Rik	RIKEN cDNA 2610304G08 gene	1	1	0	1	1
NM_027470	Pak4	p21 (CDKN1A)-activated kinase 4	1	0	1	1	1
NM_027485	Med26	mediator complex subunit 26	1	0	1	1	1
NM_027652	D5Wsu178e	DNA segment, Chr 5, Wayne State University 178, expressed	1	1	0	1	1
NM_027695	Oxsm	3-oxoacyl-ACP synthase, mitochondrial	1	1	0	1	1
NM_027789	5430416O09Rik	RIKEN cDNA 5430416O09 gene	1	1	0	1	1
NM_027819	Ggt6	gamma-glutamyltransferase 6	1	1	0	1	1
NM_027870	Armcx3	armadillo repeat containing, X-linked 3	1	1	0	1	1
NM_027871	Arhgef3	Rho guanine nucleotide exchange factor (GEF) 3	1	1	0	1	1
NM_027925	Trspap1	tRNA selenocysteine associated protein 1	1	1	0	1	1
NM_028014	2310067B10Rik	RIKEN cDNA 2310067B10 gene	1	0	1	1	1
NM_028017	Napg	N-ethylmaleimide sensitive fusion protein attachment protein gamma	1	1	0	1	1
NM_028052	Synpr	synaptoporin	1	1	0	1	1
NM_028089	Cyp2c55	cytochrome P450, family 2, subfamily c, polypeptide 55	1	1	0	1	1
NM_028123	Slc37a3	solute carrier family 37 (glycerol-3-phosphate transporter), member 3	1	1	0	1	1
NM_028130	Zfp157	zinc finger protein 157	1	1	0	1	1
NM_028137	5730528L13Rik	RIKEN cDNA 5730528L13 gene	1	1	0	1	1
NM_028197	2510003E04Rik	RIKEN cDNA 2510003E04 gene	1	1	0	1	1
NM_028266	Col16a1	collagen, type XVI, alpha 1	1	0	1	1	1
NM_028372	2900024O10Rik	RIKEN cDNA 2900024O10 gene	1	1	0	1	1
NM_028407	Gcap14	granule cell antiserum positive 14	1	0	1	1	1
NM_028724	Rin2	Ras and Rab interactor 2	1	1	0	1	1
NM_028732	4632428N05Rik	RIKEN cDNA 4632428N05 gene	1	1	0	1	1
NM_028746	Slc7a13	solute carrier family 7, (cationic amino acid transporter, y+ system) member 13	1	1	0	1	1
NM_028774	Rnf6	ring finger protein (C3H2C3 type) 6	1	0	1	1	1
NM_028776	Scyl3	SCY1-like 3 (S. cerevisiae)	1	1	0	1	1
NM_028906	Dpp8	dipeptidylpeptidase 8	1	1	0	1	1
NM_028990	Tmem168	transmembrane protein 168	1	1	0	1	1
NM_029048	Spdyb	speedy homolog B (Drosophila)	1	1	0	1	1
NM_029281	Zfp820	zinc finger protein 820	1	1	0	1	1
NM_029343	Spata9	spermatogenesis associated 9	1	1	0	1	1
NM_029570	Atp11b	ATPase, class VI, type 11B	1	1	0	1	1
NM_029610	Lyrm1	LYR motif containing 1	1	1	0	1	1
NM_029696	Mdh1b	malate dehydrogenase 1B, NAD (soluble)	1	1	0	1	1
NM_029701	Spcs3	signal peptidase complex subunit 3 homolog (S. cerevisiae)	1	1	0	1	1
NM_029742	2410127E18Rik	RIKEN cDNA 2410127E18 gene	1	0	1	1	1
NM_029749	Usp42	ubiquitin specific peptidase 42	1	1	0	1	1
NM_029793	Golga1	golgi autoantigen, golgin subfamily a, 1	1	0	1	1	1
NM_029839	Trub1	TruB pseudouridine (psi) synthase homolog 1 (E. coli)	1	1	0	1	1
NM_029870	A930001N09Rik	RIKEN cDNA A930001N09 gene	1	1	0	1	1
NM_029911	Kcnk10	potassium channel, subfamily K, member 10	1	0	1	1	1
NM_030132	D530033C11Rik	RIKEN cDNA D530033C11 gene	1	1	0	1	1
NM_030139	Zfp449	zinc finger protein 449	1	0	1	1	1
NM_030143	Ddit4l	DNA-damage-inducible transcript 4-like	1	1	0	1	1
NM_030167	4632404H22Rik	RIKEN cDNA 4632404H22 gene	1	1	0	1	1
NM_030750	Sgpp1	sphingosine-1-phosphate phosphatase 1	1	1	0	1	1
NM_030887	Jdp2	Jun dimerization protein 2	1	0	1	1	1
NM_031168	Il6	interleukin 6	1	1	0	1	1
NM_031179	Sf3b1	splicing factor 3b, subunit 1	1	0	1	1	1
NM_031256	Plekha3	pleckstrin homology domain-containing, family A (phosphoinositide binding specific) member 3	1	1	0	1	1
NM_031998	Tsga14	testis specific gene A14	1	1	0	1	1
NM_033144	2014-09-08	septin 8	1	0	1	1	1
NM_033552	Slc4a10	solute carrier family 4, sodium bicarbonate cotransporter-like, member 10	1	1	0	1	1
NM_033564	Mpv17l	Mpv17 transgene, kidney disease mutant-like	1	1	0	1	1
NM_033565	Aff4	AF4/FMR2 family, member 4	1	0	1	1	1
NM_053069	Atg5	autophagy-related 5 (yeast)	1	0	1	1	1
NM_053094	Cd163	CD163 antigen	1	0	1	1	1
NM_053105	Klhl1	kelch-like 1 (Drosophila)	1	1	0	1	1
NM_053128	Pcdhb3	protocadherin beta 3	1	1	0	1	1
NM_054056	Pawr	PRKC, apoptosis, WT1, regulator	1	1	0	1	1
NM_054060	Psg25	pregnancy-specific glycoprotein 25	1	1	0	1	1
NM_057173	Lmo1	LIM domain only 1	1	0	1	1	1
NM_080464	Ppp1r3a	protein phosphatase 1, regulatory (inhibitor) subunit 3A	1	1	0	1	1
NM_080560	Ube2n	ubiquitin-conjugating enzyme E2N	1	1	0	1	1
NM_130448	Pcdh18	protocadherin 18	1	1	0	1	1
NM_130456	Nphs2	nephrosis 2 homolog, podocin (human)	1	1	0	1	1
NM_130862	Baiap2	brain-specific angiogenesis inhibitor 1-associated protein 2	1	0	1	1	1
NM_130863	Adrbk1	adrenergic receptor kinase, beta 1	1	1	0	1	1
NM_130895	Adarb1	adenosine deaminase, RNA-specific, B1	1	1	0	1	1
NM_133669	Rp2h	retinitis pigmentosa 2 homolog (human)	1	1	0	1	1
NM_133710	Ctdspl	CTD (carboxy-terminal domain, RNA polymerase II, polypeptide A) small phosphatase-like	1	1	0	1	1
NM_133718	Tmem30a	transmembrane protein 30A	1	1	0	1	1
NM_133739	Tmem123	transmembrane protein 123	1	1	0	1	1
NM_133791	Wwc2	WW, C2 and coiled-coil domain containing 2	1	1	0	1	1
NM_133907	Ube3c	ubiquitin protein ligase E3C	1	0	1	1	1
NM_133967	Zdhhc7	zinc finger, DHHC domain containing 7	1	0	1	1	1
NM_134020	Tmed4	transmembrane emp24 protein transport domain containing 4	1	0	1	1	1
NM_134077	Rbm26	RNA binding motif protein 26	1	1	0	1	1
NM_134094	Ncald	neurocalcin delta	1	0	1	1	1
NM_138587	D6Wsu176e	DNA segment, Chr 6, Wayne State University 176, expressed	1	1	0	1	1
NM_138651	Cds2	CDP-diacylglycerol synthase (phosphatidate cytidylyltransferase) 2	1	1	0	1	1
NM_138949	Zfp286	zinc finger protein 286	1	1	0	1	1
NM_139065	Rbm47	RNA binding motif protein 47	1	0	1	1	1
NM_139144	Ogt	O-linked N-acetylglucosamine (GlcNAc) transferase (UDP-N-acetylglucosamine:polypeptide-N-acetylglucosaminyl transferase)	1	0	1	1	1
NM_144523	Zfp622	zinc finger protein 622	1	1	0	1	1
NM_144533	Nmnat3	nicotinamide nucleotide adenylyltransferase 3	1	1	0	1	1
NM_144539	Slamf7	SLAM family member 7	1	1	0	1	1
NM_144550	Ccdc52	coiled-coil domain containing 52	1	1	0	1	1
NM_144552	Stxbp6	syntaxin binding protein 6 (amisyn)	1	1	0	1	1
NM_144807	Chpt1	choline phosphotransferase 1	1	1	0	1	1
NM_144811	Cbx7	chromobox homolog 7	1	1	0	1	1
NM_144812	Tnrc6b	trinucleotide repeat containing 6b	1	0	1	1	1
NM_144851	Senp1	SUMO1/sentrin specific peptidase 1	0	1	1	1	1
NM_144866	Etf1	eukaryotic translation termination factor 1	1	0	1	1	1
NM_144882	2810022L02Rik	RIKEN cDNA 2810022L02 gene	1	1	0	1	1
NM_144902	Slc35a3	solute carrier family 35 (UDP-N-acetylglucosamine (UDP-GlcNAc) transporter), member 3	1	1	0	1	1
NM_144904	Rod1	ROD1 regulator of differentiation 1 (S. pombe)	1	1	0	1	1
NM_144910	Cnot6l	CCR4-NOT transcription complex, subunit 6-like	1	1	0	1	1
NM_144933	Med17	mediator complex subunit 17	1	1	0	1	1
NM_144934	Mbd3l2	methyl-CpG binding domain protein 3-like 2	1	1	0	1	1
NM_145078	2610305D13Rik	RIKEN cDNA 2610305D13 gene	1	1	0	1	1
NM_145125	Brwd1	bromodomain and WD repeat domain containing 1	1	1	0	1	1
NM_145133	Tifa	TRAF-interacting protein with forkhead-associated domain	1	1	0	1	1
NM_145151	Crebzf	CREB/ATF bZIP transcription factor	1	0	1	1	1
NM_145476	Tbc1d22a	TBC1 domain family, member 22a	1	1	0	1	1
NM_145491	Rhoq	ras homolog gene family, member Q	1	0	1	1	1
NM_145501	Pi4k2a	phosphatidylinositol 4-kinase type 2 alpha	1	0	1	1	1
NM_145525	Osbpl6	oxysterol binding protein-like 6	1	0	1	1	1
NM_145556	Tardbp	TAR DNA binding protein	1	1	0	1	1
NM_145569	Mat2a	methionine adenosyltransferase II, alpha	1	0	1	1	1
NM_145576	Zfp212	Zinc finger protein 212	1	1	0	1	1
NM_145612	Zfp810	zinc finger protein 810	1	1	0	1	1
NM_145833	Lin28	lin-28 homolog (C. elegans)	1	0	1	1	1
NM_145836	6430527G18Rik	RIKEN cDNA 6430527G18 gene	1	0	1	1	1
NM_145924	Cenpi	centromere protein I	1	1	0	1	1
NM_145943	BC031781	cDNA sequence BC031781	1	1	0	1	1
NM_145956	Brcc3	BRCA1/BRCA2-containing complex, subunit 3	1	1	0	1	1
NM_145991	Cdc73	cell division cycle 73, Paf1/RNA polymerase II complex component, homolog (S. cerevisiae)	0	1	1	1	1
NM_146033	Ankmy2	ankyrin repeat and MYND domain containing 2	1	1	0	1	1
NM_146103	Tmem185b	transmembrane protein 185B	1	1	0	1	1
NM_146123	Cacnb4	calcium channel, voltage-dependent, beta 4 subunit	1	0	1	1	1
NM_146135	Pias3	protein inhibitor of activated STAT 3	1	0	1	1	1
NM_146156	Pdik1l	PDLIM1 interacting kinase 1 like	1	1	0	1	1
NM_146194	Picalm	phosphatidylinositol binding clathrin assembly protein	0	1	1	1	1
NM_146231	Zfp825	zinc finger protein 825	1	1	0	1	1
NM_146238	Gemin8	gem (nuclear organelle) associated protein 8	1	1	0	1	1
NM_148950	Pknox2	Pbx/knotted 1 homeobox 2	1	1	0	1	1
NM_153062	Slc37a1	solute carrier family 37 (glycerol-3-phosphate transporter), member 1	1	1	0	1	1
NM_153157	Olfm3	olfactomedin 3	1	1	0	1	1
NM_153167	Wdr32	WD repeat domain 32	1	1	0	1	1
NM_153410	Gpsm1	G-protein signalling modulator 1 (AGS3-like, C. elegans)	1	0	1	1	1
NM_153458	Olfm3	olfactomedin 3	1	1	0	1	1
NM_153507	Cpne2	copine II	1	1	0	1	1
NM_153743	Dnmt3a	DNA methyltransferase 3A	1	1	0	1	1
NM_153780	2610044O15Rik	RIKEN cDNA 2610044O15 gene	1	1	0	1	1
NM_153787	Bclaf1	BCL2-associated transcription factor 1	1	0	1	1	1
NM_172117	Entpd6	ectonucleoside triphosphate diphosphohydrolase 6	1	1	0	1	1
NM_172253	Twistnb	TWIST neighbor	1	1	0	1	1
NM_172307	Mbtps2	membrane-bound transcription factor peptidase, site 2	1	1	0	1	1
NM_172402	Slc25a32	solute carrier family 25, member 32	1	1	0	1	1
NM_172407	Cdkn2aip	CDKN2A interacting protein	1	0	1	1	1
NM_172409	Fmnl2	formin-like 2	1	1	0	1	1
NM_172435	P2ry10	purinergic receptor P2Y, G-protein coupled 10	1	1	0	1	1
NM_172436	Slc25a12	solute carrier family 25 (mitochondrial carrier, Aralar), member 12	1	1	0	1	1
NM_172464	Daam1	dishevelled associated activator of morphogenesis 1	1	1	0	1	1
NM_172469	Clic6	chloride intracellular channel 6	1	1	0	1	1
NM_172513	D1Ertd53e	DNA segment, Chr 1, ERATO Doi 53, expressed	1	0	1	1	1
NM_172523	Slc18a2	solute carrier family 18 (vesicular monoamine), member 2	1	1	0	1	1
NM_172524	9530066K23Rik	RIKEN cDNA 9530066K23 gene	1	0	1	1	1
NM_172544	Nrxn3	neurexin III	1	1	0	1	1
NM_172546	Cnksr3	Cnksr family member 3	1	1	0	1	1
NM_172684	Rsbn1	rosbin, round spermatid basic protein 1	1	0	1	1	1
NM_172699	Foxj3	forkhead box J3	1	1	0	1	1
NM_172707	Ppp1cb	protein phosphatase 1, catalytic subunit, beta isoform	1	0	1	1	1
NM_172773	Slc17a5	solute carrier family 17 (anion/sugar transporter), member 5	1	1	0	1	1
NM_172793	Btnl9	butyrophilin-like 9	1	1	0	1	1
NM_172858	Pak7	p21 (CDKN1A)-activated kinase 7	1	0	1	1	1
NM_172860	Cbfa2t2	core-binding factor, runt domain, alpha subunit 2, translocated to, 2 (human)	1	1	0	1	1
NM_172863	Zfp697	zinc finger protein 697	1	0	1	1	1
NM_172910	Dlgap2	discs, large (Drosophila) homolog-associated protein 2	1	1	0	1	1
NM_172918	Zfp317	zinc finger protein 317	1	1	0	1	1
NM_172963	1110012J17Rik	RIKEN cDNA 1110012J17 gene	1	0	1	1	1
NM_172987	Nkain3	Na+/K+ transporting ATPase interacting 3	1	1	0	1	1
NM_172992	Phtf2	putative homeodomain transcription factor 2	1	1	0	1	1
NM_173182	Fndc3b	fibronectin type III domain containing 3B	1	0	1	1	1
NM_173185	Csnk1g1	casein kinase 1, gamma 1	1	0	1	1	1
NM_173374	Sfrs1	splicing factor, arginine/serine-rich 1 (ASF/SF2)	1	1	0	1	1
NM_173396	Tgif2	TGFB-induced factor 2	1	1	0	1	1
NM_173406	Jazf1	JAZF zinc finger 1	1	0	1	1	1
NM_173411	BC030500	cDNA sequence BC030500	1	1	0	1	1
NM_175110	5730577I03Rik	RIKEN cDNA 5730577I03 gene	1	1	0	1	1
NM_175111	Hspbap1	Hspb associated protein 1	1	1	0	1	1
NM_175114	Trak1	trafficking protein, kinesin binding 1	1	1	0	1	1
NM_175163	Zfp689	zinc finger protein 689	1	1	0	1	1
NM_175191	Gpr22	G protein-coupled receptor 22	1	1	0	1	1
NM_175236	Adhfe1	alcohol dehydrogenase, iron containing, 1	1	1	0	1	1
NM_175255	Sec24a	SEC24 related gene family, member A (S. cerevisiae)	1	1	0	1	1
NM_175260	Myh10	myosin, heavy polypeptide 10, non-muscle	1	0	1	1	1
NM_175270	Ankrd56	ankyrin repeat domain 56	1	1	0	1	1
NM_001001186	Zfp456	zinc finger protein 456	1	0	0	1	1
NM_001001297	Thnsl1	threonine synthase-like 1 (bacterial)	1	0	0	1	1
NM_001001319	Pramel4	preferentially expressed antigen in melanoma like 4	1	0	0	1	1
NM_001001444	Defb29	defensin beta 29	1	0	0	1	1
NM_001001488	Atp8b1	ATPase, class I, type 8B, member 1	1	0	0	1	1
NM_001001492	Lca5l	Leber congenital amaurosis 5-like	1	0	0	1	1
NM_001001495	Tnip3	TNFAIP3 interacting protein 3	1	0	0	1	1
NM_001001885	Tmem151a	transmembrane protein 151A	1	0	0	1	1
NM_001001892	H2-K1	histocompatibility 2, K1, K region	1	0	0	1	1
NM_001001980	Limch1	LIM and calponin homology domains 1	1	0	0	1	1
NM_001001983	Pi4ka	phosphatidylinositol 4-kinase, catalytic, alpha polypeptide	1	0	0	1	1
NM_001001985	Nat8l	N-acetyltransferase 8-like	1	0	0	1	1
NM_001001986	8430427H17Rik	RIKEN cDNA 8430427H17 gene	1	0	0	1	1
NM_001002267	Tmem158	transmembrane protein 158	1	0	0	1	1
NM_001002268	Gpr126	G protein-coupled receptor 126	1	0	0	1	1
NM_001002764	Smg6	Smg-6 homolog, nonsense mediated mRNA decay factor (C. elegans)	1	0	0	1	1
NM_001003393	Igfl3	IGF-like family member 3	1	0	0	1	1
NM_001003719	Garnl1	GTPase activating RANGAP domain-like 1	1	0	0	1	1
NM_001003815	Epb4.1l1	erythrocyte protein band 4.1-like 1	1	0	0	1	1
NM_001003829	Jph4	junctophilin 4	1	0	0	1	1
NM_001003898	Tardbp	TAR DNA binding protein	1	0	0	1	1
NM_001003946	Als2cr13	amyotrophic lateral sclerosis 2 (juvenile) chromosome region, candidate 13 (human)	1	0	0	1	1
NM_001003971	Senp7	SUMO1/sentrin specific peptidase 7	0	0	1	1	1
NM_001004143	Usp22	ubiquitin specific peptidase 22	1	0	0	1	1
NM_001004173	Sgpp2	sphingosine-1-phosphate phosphotase 2	1	0	0	1	1
NM_001004180	BC057022	cDNA sequence BC057022	0	0	1	1	1
NM_001004182	EG434008	predicted gene, EG434008	1	0	0	1	1
NM_001004184	Slc28a1	solute carrier family 28 (sodium-coupled nucleoside transporter), member 1	1	0	0	1	1
NM_001004190	Zfp560	zinc finger protein 560	1	0	0	1	1
NM_001004357	Cntnap2	contactin associated protein-like 2	1	0	0	1	1
NM_001004362	2610008E11Rik	RIKEN cDNA 2610008E11 gene	1	0	0	1	1
NM_001004436	Wapal	wings apart-like homolog (Drosophila)	1	0	0	1	1
NM_001005247	Hps5	Hermansky-Pudlak syndrome 5 homolog (human)	1	0	0	1	1
NM_001005248	Hps5	Hermansky-Pudlak syndrome 5 homolog (human)	1	0	0	1	1
NM_001005371	OTTMUSG00000010328	predicted gene, OTTMUSG00000010328	1	0	0	1	1
NM_001005424	Gm996	gene model 996, (NCBI)	1	0	0	1	1
NM_001005425	Gm1008	gene model 1008, (NCBI)	1	0	0	1	1
NM_001005507	Smg7	Smg-7 homolog, nonsense mediated mRNA decay factor (C. elegans)	1	0	0	1	1
NM_001005847	Aga	aspartylglucosaminidase	1	0	0	1	1
NM_001006664	Epb4.1l1	erythrocyte protein band 4.1-like 1	1	0	0	1	1
NM_001006675	Kcnq2	potassium voltage-gated channel, subfamily Q, member 2	1	0	0	1	1
NM_001006678	Kcnq2	potassium voltage-gated channel, subfamily Q, member 2	1	0	0	1	1
NM_001006679	Kcnq2	potassium voltage-gated channel, subfamily Q, member 2	1	0	0	1	1
NM_001006680	Kcnq2	potassium voltage-gated channel, subfamily Q, member 2	1	0	0	1	1
NM_001007077	OTTMUSG00000010009	predicted gene, OTTMUSG00000010009	1	0	0	1	1
NM_001007268	Dusp13	dual specificity phosphatase 13	1	0	0	1	1
NM_001007465	Rffl	ring finger and FYVE like domain containing protein	1	0	0	1	1
NM_001007569	Pnmal1	PNMA-like 1	1	0	0	1	1
NM_001007570	Slc25a42	solute carrier family 25, member 42	1	0	0	1	1
NM_001007578	Armcx6	armadillo repeat containing, X-linked 6	1	0	0	1	1
NM_001007589	2700059D21Rik	RIKEN cDNA 2700059D21 gene	1	0	0	1	1
NM_001008549	BC043301	cDNA sequence BC043301	1	0	0	1	1
NM_001008700	Il4ra	interleukin 4 receptor, alpha	1	0	0	1	1
NM_001008785	Kbtbd8	kelch repeat and BTB (POZ) domain containing 8	1	0	0	1	1
NM_001009818	2014-09-11	septin 11	1	0	0	1	1
NM_001009927	Smcr7	Smith-Magenis syndrome chromosome region, candidate 7 homolog (human)	1	0	0	1	1
NM_001009949	Mcart1	mitochondrial carrier triple repeat 1	1	0	0	1	1
NM_001010834	Slc10a5	solute carrier family 10 (sodium/bile acid cotransporter family), member 5	1	0	0	1	1
NM_001010930	Mrps33	mitochondrial ribosomal protein S33	1	0	0	1	1
NM_001011873	Xkr9	X Kell blood group precursor related family member 9 homolog	1	0	0	1	1
NM_001012450	Ankrd6	ankyrin repeat domain 6	1	0	0	1	1
NM_001012477	Cxcl12	chemokine (C-X-C motif) ligand 12	1	0	0	1	1
NM_001013024	Usp13	ubiquitin specific peptidase 13 (isopeptidase T-3)	1	0	0	1	1
NM_001013025	Tgfbrap1	transforming growth factor, beta receptor associated protein 1	1	0	0	1	1
NM_001013374	Lman2l	lectin, mannose-binding 2-like	1	0	0	1	1
NM_001013390	Scn4b	sodium channel, type IV, beta	1	0	0	1	1
NM_001013580	Pard3	par-3 (partitioning defective 3) homolog (C. elegans)	1	0	0	1	1
NM_001013749	Tmem151b	transmembrane protein 151B	1	0	0	1	1
NM_001013761	Gm606	gene model 606, (NCBI)	1	0	0	1	1
NM_001013777	Zfp488	zinc finger protein 488	1	0	0	1	1
NM_001014761	Scn2b	sodium channel, voltage-gated, type II, beta	1	0	0	1	1
NM_001014995	1110013L07Rik	RIKEN cDNA 1110013L07 gene	0	0	1	1	1
NM_001015046	Garnl4	GTPase activating RANGAP domain-like 4	1	0	0	1	1
NM_001024137	Pla2g4d	phospholipase A2, group IVD	1	0	0	1	1
NM_001024205	Nufip2	nuclear fragile X mental retardation protein interacting protein 2	1	0	0	1	1
NM_001024602	AW555464	expressed sequence AW555464	1	0	0	1	1
NM_001024846	Zfp62	zinc finger protein 62	1	0	0	1	1
NM_001024856	Ttbk2	tau tubulin kinase 2	1	0	0	1	1
NM_001024857	Ttbk2	tau tubulin kinase 2	1	0	0	1	1
NM_001024931	D11Bwg0517e	DNA segment, Chr 11, Brigham & Women"s Genetics 0517 expressed	1	0	0	1	1
NM_001025245	Mbp	myelin basic protein	1	0	0	1	1
NM_001025309	Pja2	praja 2, RING-H2 motif containing	1	0	0	1	1
NM_001025381	Gpr17	G protein-coupled receptor 17	1	0	0	1	1
NM_001025392	Bclaf1	BCL2-associated transcription factor 1	0	0	1	1	1
NM_001025393	Bclaf1	BCL2-associated transcription factor 1	0	0	1	1	1
NM_001025428	Spag9	sperm associated antigen 9	1	0	0	1	1
NM_001025429	Spag9	sperm associated antigen 9	1	0	0	1	1
NM_001025430	Spag9	sperm associated antigen 9	1	0	0	1	1
NM_001025439	Camk2d	calcium/calmodulin-dependent protein kinase II, delta	1	0	0	1	1
NM_001025559	Sox6	SRY-box containing gene 6	1	0	0	1	1
NM_001025565	Lhx9	LIM homeobox protein 9	0	0	1	1	1
NM_001025568	Pde1c	phosphodiesterase 1C	0	0	1	1	1
NM_001025571	Sh2d2a	SH2 domain protein 2A	1	0	0	1	1
NM_001025577	Maf	avian musculoaponeurotic fibrosarcoma (v-maf) AS42 oncogene homolog	0	0	1	1	1
NM_001025590	Kcnj6	potassium inwardly-rectifying channel, subfamily J, member 6	1	0	0	1	1
NM_001025594	Zbtb43	zinc finger and BTB domain containing 43	1	0	0	1	1
NM_001025602	Il1rl1	interleukin 1 receptor-like 1	1	0	0	1	1
NM_001025613	Otud7b	OTU domain containing 7B	1	0	0	1	1
NM_001025617	Cant1	calcium activated nucleotidase 1	1	0	0	1	1
NM_001025618	Cant1	calcium activated nucleotidase 1	1	0	0	1	1
NM_001026214	Entpd5	ectonucleoside triphosphate diphosphohydrolase 5	1	0	0	1	1
NM_001029936	Specc1	sperm antigen with calponin homology and coiled-coil domains 1	1	0	0	1	1
NM_001029988	Fat2	FAT tumor suppressor homolog 2 (Drosophila)	1	0	0	1	1
NM_001033159	Zfp597	zinc finger protein 597	1	0	0	1	1
NM_001033168	1700066B19Rik	RIKEN cDNA 1700066B19 gene	1	0	0	1	1
NM_001033191	Ard1b	ARD1 homolog B (S. cerevisiae)	1	0	0	1	1
NM_001033206	Pwwp2b	PWWP domain containing 2B	1	0	0	1	1
NM_001033214	E330034G19Rik	RIKEN cDNA E330034G19 gene	1	0	0	1	1
NM_001033223	Lin7a	lin-7 homolog A (C. elegans)	1	0	0	1	1
NM_001033238	Cblb	Casitas B-lineage lymphoma b	1	0	0	1	1
NM_001033261	Ccdc131	coiled-coil domain containing 131	1	0	0	1	1
NM_001033271	Tmem55b	transmembrane protein 55b	1	0	0	1	1
NM_001033311	BC023744	cDNA sequence BC023744	1	0	0	1	1
NM_001033318	Cog7	component of oligomeric golgi complex 7	1	0	0	1	1
NM_001033331	Gas2l3	growth arrest-specific 2 like 3	1	0	0	1	1
NM_001033349	Gm410	gene model 410, (NCBI)	1	0	0	1	1
NM_001033354	Iqsec3	IQ motif and Sec7 domain 3	1	0	0	1	1
NM_001033355	Zfp568	zinc finger protein 568	1	0	0	1	1
NM_001033369	Acvr1c	activin A receptor, type IC	1	0	0	1	1
NM_001033385	D630037F22Rik	RIKEN cDNA D630037F22 gene	1	0	0	1	1
NM_001033393	Tmem104	transmembrane protein 104	1	0	0	1	1
NM_001033420	Dock1	dedicator of cytokinesis 1	1	0	0	1	1
NM_001033422	Thoc2	THO complex 2	1	0	0	1	1
NM_001033432	Heca	headcase homolog (Drosophila)	1	0	0	1	1
NM_001033435	Gm885	gene model 885, (NCBI)	1	0	0	1	1
NM_001033475	Tmed8	transmembrane emp24 domain containing 8	1	0	0	1	1
NM_001033536	Rfxdc2	regulatory factor X domain containing 2 homolog (human)	1	0	0	1	1
NM_001033783	EG434396	predicted gene, EG434396	1	0	0	1	1
NM_001033813	9530015I07Rik	RIKEN cDNA 9530015I07 gene	1	0	0	1	1
NM_001034101	OTTMUSG00000010537	predicted gene, OTTMUSG00000010537	1	0	0	1	1
NM_001034851	1810015C04Rik	RIKEN cDNA 1810015C04 gene	1	0	0	1	1
NM_001034872	Gm853	gene model 853, (NCBI)	1	0	0	1	1
NM_001034882	EG432879	predicted gene, EG432879	1	0	0	1	1
NM_001034883	EG432982	predicted gene, EG432982	1	0	0	1	1
NM_001034885	Pnpla1	patatin-like phospholipase domain containing 1	1	0	0	1	1
NM_001034887	OTTMUSG00000012686	predicted gene, OTTMUSG00000012686	1	0	0	1	1
NM_001035122	Golm1	golgi membrane protein 1	1	0	0	1	1
NM_001035231	Zfp748	zinc finger protein 748	1	0	0	1	1
NM_001035239	Trpm3	transient receptor potential cation channel, subfamily M, member 3	1	0	0	1	1
NM_001035240	Trpm3	transient receptor potential cation channel, subfamily M, member 3	1	0	0	1	1
NM_001035241	Trpm3	transient receptor potential cation channel, subfamily M, member 3	1	0	0	1	1
NM_001035243	Trpm3	transient receptor potential cation channel, subfamily M, member 3	1	0	0	1	1
NM_001036684	Atp2b2	ATPase, Ca++ transporting, plasma membrane 2	1	0	0	1	1
NM_001037098	Btbd14a	BTB (POZ) domain containing 14A	1	0	0	1	1
NM_001037719	Btla	B and T lymphocyte associated	1	0	0	1	1
NM_001037724	Adcy7	adenylate cyclase 7	1	0	0	1	1
NM_001037725	Als2cr13	amyotrophic lateral sclerosis 2 (juvenile) chromosome region, candidate 13 (human)	1	0	0	1	1
NM_001037759	Sgk3	serum/glucocorticoid regulated kinase 3	1	0	0	1	1
NM_001037922	EG624855	predicted gene, EG624855	1	0	0	1	1
NM_001037924	EG625321	predicted gene, EG625321	1	0	0	1	1
NM_001037937	Depdc6	DEP domain containing 6	1	0	0	1	1
NM_001038018	Grk6	G protein-coupled receptor kinase 6	1	0	0	1	1
NM_001038609	Mapt	microtubule-associated protein tau	1	0	0	1	1
NM_001038613	Olfm1	olfactomedin 1	1	0	0	1	1
NM_001038624	Ric3	resistance to inhibitors of cholinesterase 3 homolog (C. elegans)	1	0	0	1	1
NM_001038625	Sertad2	SERTA domain containing 2	0	0	1	1	1
NM_001038627	Smurf1	SMAD specific E3 ubiquitin protein ligase 1	1	0	0	1	1
NM_001038635	Stk35	serine/threonine kinase 35	1	0	0	1	1
NM_001038651	E130120F12Rik	RIKEN cDNA E130120F12 gene	1	0	0	1	1
NM_001038658	Faim2	Fas apoptotic inhibitory molecule 2	1	0	0	1	1
NM_001038701	Gabrb3	gamma-aminobutyric acid (GABA-A) receptor, subunit beta 3	1	0	0	1	1
NM_001038703	Gpr146	G protein-coupled receptor 146	1	0	0	1	1
NM_001038710	Tmod2	tropomodulin 2	1	0	0	1	1
NM_001038990	Ids	iduronate 2-sulfatase	1	0	0	1	1
NM_001038991	Ids	iduronate 2-sulfatase	1	0	0	1	1
NM_001038993	Rnf38	ring finger protein 38	1	0	0	1	1
NM_001039045	Pigc	phosphatidylinositol glycan anchor biosynthesis, class C	1	0	0	1	1
NM_001039047	Trim58	tripartite motif-containing 58	1	0	0	1	1
NM_001039050	Pkib	protein kinase inhibitor beta, cAMP dependent, testis specific	1	0	0	1	1
NM_001039052	Pkib	protein kinase inhibitor beta, cAMP dependent, testis specific	1	0	0	1	1
NM_001039055	Pofut1	protein O-fucosyltransferase 1	1	0	0	1	1
NM_001039056	Kcnj15	potassium inwardly-rectifying channel, subfamily J, member 15	1	0	0	1	1
NM_001039057	Kcnj15	potassium inwardly-rectifying channel, subfamily J, member 15	1	0	0	1	1
NM_001039071	Ldb3	LIM domain binding 3	1	0	0	1	1
NM_001039072	Ldb3	LIM domain binding 3	1	0	0	1	1
NM_001039073	Ldb3	LIM domain binding 3	1	0	0	1	1
NM_001039074	Ldb3	LIM domain binding 3	1	0	0	1	1
NM_001039077	Prosc	proline synthetase co-transcribed	1	0	0	1	1
NM_001039078	Prosc	proline synthetase co-transcribed	1	0	0	1	1
NM_001039126	Asb1	ankyrin repeat and SOCS box-containing protein 1	1	0	0	1	1
NM_001039138	Camk2g	calcium/calmodulin-dependent protein kinase II gamma	1	0	0	1	1
NM_001039139	Camk2g	calcium/calmodulin-dependent protein kinase II gamma	1	0	0	1	1
NM_001039154	Cdh8	cadherin 8	1	0	0	1	1
NM_001039167	D11Bwg0517e	DNA segment, Chr 11, Brigham & Women"s Genetics 0517 expressed	1	0	0	1	1
NM_001039168	D11Bwg0517e	DNA segment, Chr 11, Brigham & Women"s Genetics 0517 expressed	1	0	0	1	1
NM_001039169	Eif4e2	eukaryotic translation initiation factor 4E member 2	1	0	0	1	1
NM_001039170	Eif4e2	eukaryotic translation initiation factor 4E member 2	1	0	0	1	1
NM_001039181	Npr3	natriuretic peptide receptor 3	1	0	0	1	1
NM_001039188	Rreb1	ras responsive element binding protein 1	1	0	0	1	1
NM_001039209	OTTMUSG00000010671	predicted gene, OTTMUSG00000010671	1	0	0	1	1
NM_001039214	Mex3c	mex3 homolog C (C. elegans)	1	0	0	1	1
NM_001039231	C230055K05Rik	RIKEN cDNA C230055K05 gene	1	0	0	1	1
NM_001039354	Lin7a	lin-7 homolog A (C. elegans)	1	0	0	1	1
NM_001039365	Mobp	myelin-associated oligodendrocytic basic protein	1	0	0	1	1
NM_001039376	Pde4dip	phosphodiesterase 4D interacting protein (myomegalin)	1	0	0	1	1
NM_001039483	Tmco1	transmembrane and coiled-coil domains 1	1	0	0	1	1
NM_001039484	Kcnj10	potassium inwardly-rectifying channel, subfamily J, member 10	1	0	0	1	1
NM_001039493	Plekhm3	pleckstrin homology domain containing, family M, member 3	1	0	0	1	1
NM_001039515	Arl4a	ADP-ribosylation factor-like 4A	1	0	0	1	1
NM_001039530	Parp14	poly (ADP-ribose) polymerase family, member 14	1	0	0	1	1
NM_001039532	Zfp784	zinc finger protein 784	1	0	0	1	1
NM_001039537	Lif	leukemia inhibitory factor	1	0	0	1	1
NM_001039581	Abca3	ATP-binding cassette, sub-family A (ABC1), member 3	1	0	0	1	1
NM_001039669	A930037G23Rik	RIKEN cDNA A930037G23 gene	1	0	0	1	1
NM_001039965	1200003I07Rik	RIKEN cDNA 1200003I07 gene	1	0	0	1	1
NM_001039967	1200003I07Rik	RIKEN cDNA 1200003I07 gene	1	0	0	1	1
NM_001040026	Sco1	SCO cytochrome oxidase deficient homolog 1 (yeast)	1	0	0	1	1
NM_001040106	Aak1	AP2 associated kinase 1	1	0	0	1	1
NM_001040131	Eif4g2	eukaryotic translation initiation factor 4, gamma 2	1	0	0	1	1
NM_001040611	Peg10	paternally expressed 10	1	0	0	1	1
NM_001040682	Clmn	calmin	1	0	0	1	1
NM_001040689	Rspo4	R-spondin family, member 4	1	0	0	1	1
NM_001042407	Pex10	peroxisome biogenesis factor 10	1	0	0	1	1
NM_001042421	Kntc1	kinetochore associated 1	1	0	0	1	1
NM_001042501	5830415L20Rik	RIKEN cDNA 5830415L20 gene	1	0	0	1	1
NM_001042513	Txnrd1	thioredoxin reductase 1	1	0	0	1	1
NM_001042514	Txnrd1	thioredoxin reductase 1	1	0	0	1	1
NM_001042523	Txnrd1	thioredoxin reductase 1	1	0	0	1	1
NM_001042591	Arrdc3	arrestin domain containing 3	1	0	0	1	1
NM_001042592	Arrdc4	arrestin domain containing 4	1	0	0	1	1
NM_001042593	Hbs1l	Hbs1-like (S. cerevisiae)	1	0	0	1	1
NM_001042605	Cd74	CD74 antigen (invariant polypeptide of major histocompatibility complex, class II antigen-associated)	1	0	0	1	1
NM_001042611	Cp	ceruloplasmin	1	0	0	1	1
NM_001042634	Clk1	CDC-like kinase 1	1	0	0	1	1
NM_001042652	Nusap1	nucleolar and spindle associated protein 1	1	0	0	1	1
NM_001042659	Fzd5	frizzled homolog 5 (Drosophila)	1	0	0	1	1
NM_001042707	Ilf3	interleukin enhancer binding factor 3	1	0	0	1	1
NM_001042714	9330128J19Rik	RIKEN cDNA 9330128J19 gene	1	0	0	1	1
NM_001042752	Neo1	neogenin	1	0	0	1	1
NM_001043317	Cd22	CD22 antigen	1	0	0	1	1
NM_001044371	Rad17	RAD17 homolog (S. pombe)	1	0	0	1	1
NM_001044383	Ubtf	upstream binding transcription factor, RNA polymerase I	1	0	0	1	1
NM_001044720	Abcc9	ATP-binding cassette, sub-family C (CFTR/MRP), member 9	1	0	0	1	1
NM_001044740	Slc7a2	solute carrier family 7 (cationic amino acid transporter, y+ system), member 2	1	0	0	1	1
NM_001044747	Zfp68	zinc finger protein 68	1	0	0	1	1
NM_001045481	Ifi203	interferon activated gene 203	1	0	0	1	1
NM_001045482	Rbak	RB-associated KRAB repressor	1	0	0	1	1
NM_001045514	Akna	AT-hook transcription factor	1	0	0	1	1
NM_001045518	C530008M07Rik	RIKEN cDNA C530008M07 gene	1	0	0	1	1
NM_001045520	Clint1	clathrin interactor 1	1	0	0	1	1
NM_001045526	A430084P05Rik	RIKEN cDNA A430084P05 gene	1	0	0	1	1
NM_001045527	Hsf5	heat shock transcription factor family member 5	1	0	0	1	1
NM_001045539	Xlr5a	X-linked lymphocyte-regulated 5A	1	0	0	1	1
NM_001045540	OTTMUSG00000005523	predicted gene, OTTMUSG00000005523	1	0	0	1	1
NM_001045959	Mink1	misshapen-like kinase 1 (zebrafish)	1	0	0	1	1
NM_001045964	Mink1	misshapen-like kinase 1 (zebrafish)	1	0	0	1	1
NM_001047433	Dph3	DPH3 homolog (KTI11, S. cerevisiae)	1	0	0	1	1
NM_001048139	Bdnf	brain derived neurotrophic factor	1	0	0	1	1
NM_001048141	Bdnf	brain derived neurotrophic factor	1	0	0	1	1
NM_001048142	Bdnf	brain derived neurotrophic factor	1	0	0	1	1
NM_001048143	Mon1b	MON1 homolog b (yeast)	1	0	0	1	1
NM_001048167	Mtap6	microtubule-associated protein 6	1	0	0	1	1
NM_001048267	Tnpo1	transportin 1	1	0	0	1	1
NM_001076789	Cbx5	chromobox homolog 5 (Drosophila HP1a)	1	0	0	1	1
NM_001076791	9630025I21Rik	RIKEN cDNA 9630025I21 gene	1	0	0	1	1
NM_001077190	Abi1	abl-interactor 1	1	0	0	1	1
NM_001077192	Abi1	abl-interactor 1	1	0	0	1	1
NM_001077193	Abi1	abl-interactor 1	1	0	0	1	1
NM_001077202	Hs6st2	heparan sulfate 6-O-sulfotransferase 2	1	0	0	1	1
NM_001077265	Hnrnpd	heterogeneous nuclear ribonucleoprotein D	1	0	0	1	1
NM_001077266	Hnrnpd	heterogeneous nuclear ribonucleoprotein D	1	0	0	1	1
NM_001077267	Hnrnpd	heterogeneous nuclear ribonucleoprotein D	1	0	0	1	1
NM_001077406	Nrp2	neuropilin 2	1	0	0	1	1
NM_001077407	Nrp2	neuropilin 2	1	0	0	1	1
NM_001079830	Trim33	tripartite motif-containing 33	1	0	0	1	1
NM_001079844	Gpc6	glypican 6	1	0	0	1	1
NM_001079849	Paip1	polyadenylate binding protein-interacting protein 1	1	0	0	1	1
NM_001079876	Gas2l3	growth arrest-specific 2 like 3	1	0	0	1	1
NM_001079883	Bcl11b	B-cell leukemia/lymphoma 11B	1	0	0	1	1
NM_001080814	Fat3	FAT tumor suppressor homolog 3 (Drosophila)	1	0	0	1	1
NM_001080819	Arid1a	AT rich interactive domain 1A (Swi1 like)	1	0	0	1	1
NM_001080974	Sri	sorcin	1	0	0	1	1
NM_001081016	Zc3h7b	zinc finger CCCH type containing 7B	1	0	0	1	1
NM_001081019	OTTMUSG00000007855	predicted gene, OTTMUSG00000007855	1	0	0	1	1
NM_001081021	Zfp780b	zinc finger protein 780B	1	0	0	1	1
NM_001081034	Fbxo11	F-box protein 11	1	0	0	1	1
NM_001081039	Dock9	dedicator of cytokinesis 9	1	0	0	1	1
NM_001081055	Tmem1	transmembrane protein 1	1	0	0	1	1
NM_001081057	4930573I19Rik	RIKEN cDNA 4930573I19 gene	1	0	0	1	1
NM_001081066	Dennd3	DENN/MADD domain containing 3	1	0	0	1	1
NM_001081075	5730455O13Rik	RIKEN cDNA 5730455O13 gene	1	0	0	1	1
NM_001081077	Cwf19l1	CWF19-like 1, cell cycle control (S. pombe)	1	0	0	1	1
NM_001081080	Phf3	PHD finger protein 3	1	0	0	1	1
NM_001081081	Gls	glutaminase	1	0	0	1	1
NM_001081101	4933407H18Rik	RIKEN cDNA 4933407H18 gene	1	0	0	1	1
NM_001081103	Stim2	stromal interaction molecule 2	1	0	0	1	1
NM_001081105	Rhoh	ras homolog gene family, member H	1	0	0	1	1
NM_001081109	Lmtk2	lemur tyrosine kinase 2	1	0	0	1	1
NM_001081110	Cd8a	CD8 antigen, alpha chain	1	0	0	1	1
NM_001081115	1190020J12Rik	RIKEN cDNA 1190020J12 gene	1	0	0	1	1
NM_001081116	Arhgef17	Rho guanine nucleotide exchange factor (GEF) 17	1	0	0	1	1
NM_001081122	Cep63	centrosomal protein 63	1	0	0	1	1
NM_001081129	Cntnap3	contactin associated protein-like 3	1	0	0	1	1
NM_001081133	Kif16b	kinesin family member 16B	1	0	0	1	1
NM_001081135	Prrg3	proline rich Gla (G-carboxyglutamic acid) 3 (transmembrane)	1	0	0	1	1
NM_001081144	Zfp518b	zinc finger protein 518B	1	0	0	1	1
NM_001081147	Oxtr	oxytocin receptor	1	0	0	1	1
NM_001081148	Cyp2b23	cytochrome P450, family 2, subfamily b, polypeptide 23	1	0	0	1	1
NM_001081151	Gan	giant axonal neuropathy	1	0	0	1	1
NM_001081158	1300001I01Rik	RIKEN cDNA 1300001I01 gene	1	0	0	1	1
NM_001081161	9630050M13Rik	RIKEN cDNA 9630050M13 gene	1	0	0	1	1
NM_001081163	Chsy1	carbohydrate (chondroitin) synthase 1	1	0	0	1	1
NM_001081170	Pacs2	phosphofurin acidic cluster sorting protein 2	1	0	0	1	1
NM_001081196	Hnrnpul2	heterogeneous nuclear ribonucleoprotein U-like 2	1	0	0	1	1
NM_001081203	Sbno1	sno, strawberry notch homolog 1 (Drosophila)	1	0	0	1	1
NM_001081204	B3galtl	beta 1,3-galactosyltransferase-like	1	0	0	1	1
NM_001081209	Prdm14	PR domain containing 14	1	0	0	1	1
NM_001081213	Ermp1	endoplasmic reticulum metallopeptidase 1	1	0	0	1	1
NM_001081216	Phip	pleckstrin homology domain interacting protein	1	0	0	1	1
NM_001081222	Esco1	establishment of cohesion 1 homolog 1 (S. cerevisiae)	1	0	0	1	1
NM_001081227	6330403A02Rik	RIKEN cDNA 6330403A02 gene	1	0	0	1	1
NM_001081230	Mtap9	microtubule-associated protein 9	1	0	0	1	1
NM_001081235	Mn1	meningioma 1	1	0	0	1	1
NM_001081236	2410131K14Rik	RIKEN cDNA 2410131K14 gene	1	0	0	1	1
NM_001081237	Klhdc5	kelch domain containing 5	1	0	0	1	1
NM_001081240	AI931714	expressed sequence AI931714	1	0	0	1	1
NM_001081242	Tln2	talin 2	1	0	0	1	1
NM_001081249	Vcan	versican	1	0	0	1	1
NM_001081263	Slc44a5	solute carrier family 44, member 5	1	0	0	1	1
NM_001081274	Pgd	phosphogluconate dehydrogenase	1	0	0	1	1
NM_001081290	Bat2d	BAT2 domain containing 1	1	0	0	1	1
NM_001081292	Map3k10	mitogen-activated protein kinase kinase kinase 10	1	0	0	1	1
NM_001081293	4930535B03Rik	RIKEN cDNA 4930535B03 gene	1	0	0	1	1
NM_001081323	Mphosph9	M-phase phosphoprotein 9	1	0	0	1	1
NM_001081331	4933400E14Rik	RIKEN cDNA 4933400E14 gene	1	0	0	1	1
NM_001081333	Plekhg4	pleckstrin homology domain containing, family G (with RhoGef domain) member 4	1	0	0	1	1
NM_001081350	Nol8	nucleolar protein 8	1	0	0	1	1
NM_001081360	Camsap1l1	calmodulin regulated spectrin-associated protein 1-like 1	1	0	0	1	1
NM_001081363	Cenpf	centromere protein F	1	0	0	1	1
NM_001081367	Kctd17	potassium channel tetramerisation domain containing 17	1	0	0	1	1
NM_001081373	Cep164	centrosomal protein 164	1	0	0	1	1
NM_001081378	C330002I19Rik	RIKEN cDNA C330002I19 gene	1	0	0	1	1
NM_001081389	Nlrp6	NLR family, pyrin domain containing 6	1	0	0	1	1
NM_001081391	Csmd3	CUB and Sushi multiple domains 3	1	0	0	1	1
NM_001081395	Amotl1	angiomotin-like 1	1	0	0	1	1
NM_001081412	Bcr	breakpoint cluster region homolog	1	0	0	1	1
NM_001081419	Dip2a	DIP2 disco-interacting protein 2 homolog A (Drosophila)	1	0	0	1	1
NM_001081430	Nat12	N-acetyltransferase 12	1	0	0	1	1
NM_001081433	Ankrd44	ankyrin repeat domain 44	1	0	0	1	1
NM_001081446	Iqck	IQ motif containing K	1	0	0	1	1
NM_001081458	Ppp2r5c	protein phosphatase 2, regulatory subunit B (B56), gamma isoform	1	0	0	1	1
NM_001081548	Zfp650	zinc finger protein 650	1	0	0	1	1
NM_001081557	Camta1	calmodulin binding transcription activator 1	1	0	0	1	1
NM_001081633	Es2el	expressed sequence 2 embryonic lethal	1	0	0	1	1
NM_001081682	Gnb1l	guanine nucleotide binding protein (G protein), beta polypeptide 1-like	1	0	0	1	1
NM_001081750	Zfp664	zinc finger protein 664	1	0	0	1	1
NM_001081756	E030049G20Rik	RIKEN cDNA E030049G20 gene	1	0	0	1	1
NM_001081963	9430020K01Rik	RIKEN cDNA 9430020K01 gene	1	0	0	1	1
NM_001081975	Mfap1b	microfibrillar-associated protein 1B	1	0	0	1	1
NM_001081979	Mecp2	methyl CpG binding protein 2	1	0	0	1	1
NM_001082412	Mcart6	mitochondrial carrier triple repeat 6	1	0	0	1	1
NM_001082414	Sh3d19	SH3 domain protein D19	1	0	0	1	1
NM_001082552	Trim21	tripartite motif-containing 21	1	0	0	1	1
NM_001082553	Rab27b	RAB27b, member RAS oncogene family	1	0	0	1	1
NM_001082960	Itgam	integrin alpha M	1	0	0	1	1
NM_001083114	Pphln1	periphilin 1	1	0	0	1	1
NM_001083125	Lhx6	LIM homeobox protein 6	1	0	0	1	1
NM_001083126	Lhx6	LIM homeobox protein 6	1	0	0	1	1
NM_001083127	Lhx6	LIM homeobox protein 6	1	0	0	1	1
NM_001083316	Pdgfra	platelet derived growth factor receptor, alpha polypeptide	1	0	0	1	1
NM_001083318	Etv3	ets variant gene 3	1	0	0	1	1
NM_001083319	Ubp1	upstream binding protein 1	1	0	0	1	1
NM_001083341	Mboat2	membrane bound O-acyltransferase domain containing 2	1	0	0	1	1
NM_001083342	Ptchd2	patched domain containing 2	1	0	0	1	1
NM_001083587	Tns3	tensin 3	1	0	0	1	1
NM_001083628	AK220484	cDNA sequence AK220484	1	0	0	1	1
NM_001083806	Gria2	glutamate receptor, ionotropic, AMPA2 (alpha 2)	1	0	0	1	1
NM_001083810	2600010E01Rik	RIKEN cDNA 2600010E01 gene	1	0	0	1	1
NM_001083902	Slc12a8	solute carrier family 12 (potassium/chloride transporters), member 8	1	0	0	1	1
NM_001083917	Scn3b	sodium channel, voltage-gated, type III, beta	1	0	0	1	1
NM_001083937	Slc35a2	solute carrier family 35 (UDP-galactose transporter), member A2	1	0	0	1	1
NM_001083967	Tcf4	transcription factor 4	1	0	0	1	1
NM_001085355	Arid1b	AT rich interactive domain 1B (Swi1 like)	1	0	0	1	1
NM_001085373	Mcc	mutated in colorectal cancers	1	0	0	1	1
NM_001085374	Mcc	mutated in colorectal cancers	1	0	0	1	1
NM_001085376	Pappa2	pappalysin 2	1	0	0	1	1
NM_001085416	Zfp467	zinc finger protein 467	1	0	0	1	1
NM_001085418	Pramel5	preferentially expressed antigen in melanoma like 5	1	0	0	1	1
NM_001085419	OTTMUSG00000010432	predicted gene, OTTMUSG00000010432	1	0	0	1	1
NM_001085421	Tspyl5	testis-specific protein, Y-encoded-like 5	1	0	0	1	1
NM_001085440	Smcr8	Smith-Magenis syndrome chromosome region, candidate 8 homolog (human)	1	0	0	1	1
NM_001085492	Rere	arginine glutamic acid dipeptide (RE) repeats	1	0	0	1	1
NM_001085495	Arfgef2	ADP-ribosylation factor guanine nucleotide-exchange factor 2 (brefeldin A-inhibited)	1	0	0	1	1
NM_001085507	Zbtb34	zinc finger and BTB domain containing 34	1	0	0	1	1
NM_001085508	4930500O05Rik	RIKEN cDNA 4930500O05 gene	1	0	0	1	1
NM_001093759	2410002O22Rik	RIKEN cDNA 2410002O22 gene	1	0	0	1	1
NM_001093760	2410002O22Rik	RIKEN cDNA 2410002O22 gene	1	0	0	1	1
NM_001098171	Pcdh10	protocadherin 10	1	0	0	1	1
NM_001098225	Adam22	a disintegrin and metallopeptidase domain 22	1	0	0	1	1
NM_001098226	Tead3	TEA domain family member 3	1	0	0	1	1
NM_001098227	Sdcbp	syndecan binding protein	1	0	0	1	1
NM_001098230	Ppm2c	protein phosphatase 2C, magnesium dependent, catalytic subunit	1	0	0	1	1
NM_001098231	Ppm2c	protein phosphatase 2C, magnesium dependent, catalytic subunit	1	0	0	1	1
NM_001098476	Grsf1	G-rich RNA sequence binding factor 1	1	0	0	1	1
NM_001098636	Pwwp2b	PWWP domain containing 2B	1	0	0	1	1
NM_001098723	Yy2	Yy2 transcription factor	1	0	0	1	1
NM_001099779	Pklr	pyruvate kinase liver and red blood cell	1	0	0	1	1
NM_001110849	2600010E01Rik	RIKEN cDNA 2600010E01 gene	1	0	0	1	1
NM_007379	Abca2	ATP-binding cassette, sub-family A (ABC1), member 2	1	0	0	1	1
NM_007380	Abi1	abl-interactor 1	1	0	0	1	1
NM_007400	Adam12	a disintegrin and metallopeptidase domain 12 (meltrin alpha)	1	0	0	1	1
NM_007426	Angpt2	angiopoietin 2	1	0	0	1	1
NM_007429	Agtr2	angiotensin II receptor, type 2	1	0	0	1	1
NM_007434	Akt2	thymoma viral proto-oncogene 2	1	0	0	1	1
NM_007459	Ap2a2	adaptor protein complex AP-2, alpha 2 subunit	1	0	0	1	1
NM_007461	Apba2	amyloid beta (A4) precursor protein-binding, family A, member 2	1	0	0	1	1
NM_007472	Aqp1	aquaporin 1	1	0	0	1	1
NM_007477	Arf2	ADP-ribosylation factor 2	1	0	0	1	1
NM_007478	Arf3	ADP-ribosylation factor 3	1	0	0	1	1
NM_007481	Arf6	ADP-ribosylation factor 6	1	0	0	1	1
NM_007487	Arl4a	ADP-ribosylation factor-like 4A	1	0	0	1	1
NM_007495	Astn1	astrotactin 1	1	0	0	1	1
NM_007496	Zfhx3	zinc finger homeobox 3	1	0	0	1	1
NM_007501	Neurod4	neurogenic differentiation 4	1	0	0	1	1
NM_007502	Atp1b3	ATPase, Na+/K+ transporting, beta 3 polypeptide	1	0	0	1	1
NM_007508	Atp6v1a	ATPase, H+ transporting, lysosomal V1 subunit A	1	0	0	1	1
NM_007514	Slc7a2	solute carrier family 7 (cationic amino acid transporter, y+ system), member 2	1	0	0	1	1
NM_007516	Hnrnpd	heterogeneous nuclear ribonucleoprotein D	1	0	0	1	1
NM_007540	Bdnf	brain derived neurotrophic factor	1	0	0	1	1
NM_007544	Bid	BH3 interacting domain death agonist	1	0	0	1	1
NM_007545	Hrk	harakiri, BCL2 interacting protein (contains only BH3 domain)	1	0	0	1	1
NM_007547	Sirpa	signal-regulatory protein alpha	1	0	0	1	1
NM_007553	Bmp2	bone morphogenetic protein 2	0	0	1	1	1
NM_007562	Bnc1	basonuclin 1	1	0	0	1	1
NM_007576	C4bp	complement component 4 binding protein	1	0	0	1	1
NM_007592	Car8	carbonic anhydrase 8	1	0	0	1	1
NM_007595	Camk2b	calcium/calmodulin-dependent protein kinase II, beta	1	0	0	1	1
NM_007610	Casp2	caspase 2	1	0	0	1	1
NM_007616	Cav1	caveolin, caveolae protein 1	1	0	0	1	1
NM_007626	Cbx5	chromobox homolog 5 (Drosophila HP1a)	1	0	0	1	1
NM_007634	Ccnf	cyclin F	1	0	0	1	1
NM_007641	Ms4a1	membrane-spanning 4-domains, subfamily A, member 1	1	0	0	1	1
NM_007647	Entpd5	ectonucleoside triphosphate diphosphohydrolase 5	1	0	0	1	1
NM_007652	Cd59a	CD59a antigen	1	0	0	1	1
NM_007659	Cdc2a	cell division cycle 2 homolog A (S. pombe)	1	0	0	1	1
NM_007664	Cdh2	cadherin 2	0	0	1	1	1
NM_007682	Cenpb	centromere protein B	1	0	0	1	1
NM_007688	Cfl2	cofilin 2, muscle	1	0	0	1	1
NM_007693	Chga	chromogranin A	1	0	0	1	1
NM_007697	Chl1	cell adhesion molecule with homology to L1CAM	1	0	0	1	1
NM_007717	Cmah	cytidine monophospho-N-acetylneuraminic acid hydroxylase	1	0	0	1	1
NM_007724	Cnga2	cyclic nucleotide gated channel alpha 2	1	0	0	1	1
NM_007733	Col19a1	collagen, type XIX, alpha 1	1	0	0	1	1
NM_007737	Col5a2	collagen, type V, alpha 2	1	0	0	1	1
NM_007746	Map3k8	mitogen-activated protein kinase kinase kinase 8	1	0	0	1	1
NM_007754	Cpd	carboxypeptidase D	1	0	0	1	1
NM_007755	Cpeb1	cytoplasmic polyadenylation element binding protein 1	1	0	0	1	1
NM_007757	Cpox	coproporphyrinogen oxidase	1	0	0	1	1
NM_007762	Crhr1	corticotropin releasing hormone receptor 1	1	0	0	1	1
NM_007778	Csf1	colony stimulating factor 1 (macrophage)	1	0	0	1	1
NM_007781	Csf2rb2	colony stimulating factor 2 receptor, beta 2, low-affinity (granulocyte-macrophage)	1	0	0	1	1
NM_007789	Ncan	neurocan	1	0	0	1	1
NM_007791	Csrp1	cysteine and glycine-rich protein 1	1	0	0	1	1
NM_007798	Ctsb	cathepsin B	1	0	0	1	1
NM_007823	Cyp4b1	cytochrome P450, family 4, subfamily b, polypeptide 1	1	0	0	1	1
NM_007825	Cyp7b1	cytochrome P450, family 7, subfamily b, polypeptide 1	1	0	0	1	1
NM_007831	Dcc	deleted in colorectal carcinoma	1	0	0	1	1
NM_007867	Dlx4	distal-less homeobox 4	1	0	0	1	1
NM_007880	Arid3a	AT rich interactive domain 3A (Bright like)	1	0	0	1	1
NM_007882	Dsc3	desmocollin 3	1	0	0	1	1
NM_007891	E2f1	E2F transcription factor 1	1	0	0	1	1
NM_007896	Mapre1	microtubule-associated protein, RP/EB family, member 1	1	0	0	1	1
NM_007913	Egr1	early growth response 1	1	0	0	1	1
NM_007920	Elf1	E74-like factor 1	1	0	0	1	1
NM_007934	Enpep	glutamyl aminopeptidase	1	0	0	1	1
NM_007936	Epha4	Eph receptor A4	1	0	0	1	1
NM_007938	Epha6	Eph receptor A6	1	0	0	1	1
NM_007941	Stx2	syntaxin 2	1	0	0	1	1
NM_007951	Erh	enhancer of rudimentary homolog (Drosophila)	1	0	0	1	1
NM_007983	Faf1	Fas-associated factor 1	1	0	0	1	1
NM_007988	Fasn	fatty acid synthase	1	0	0	1	1
NM_008002	Fgf10	fibroblast growth factor 10	1	0	0	1	1
NM_008010	Fgfr3	fibroblast growth factor receptor 3	1	0	0	1	1
NM_008013	Fgl2	fibrinogen-like protein 2	1	0	0	1	1
NM_008017	Smc2	structural maintenance of chromosomes 2	1	0	0	1	1
NM_008031	Fmr1	fragile X mental retardation syndrome 1 homolog	1	0	0	1	1
NM_008044	Fxn	frataxin	1	0	0	1	1
NM_008047	Fstl1	follistatin-like 1	1	0	0	1	1
NM_008055	Fzd4	frizzled homolog 4 (Drosophila)	0	0	1	1	1
NM_008060	Ganab	alpha glucosidase 2 alpha neutral subunit	1	0	0	1	1
NM_008065	Gabpa	GA repeat binding protein, alpha	1	0	0	1	1
NM_008071	Gabrb3	gamma-aminobutyric acid (GABA-A) receptor, subunit beta 3	1	0	0	1	1
NM_008079	Galc	galactosylceramidase	1	0	0	1	1
NM_008087	Gas2	growth arrest specific 2	1	0	0	1	1
NM_008099	Gcet2	germinal center expressed transcript 2	1	0	0	1	1
NM_008101	Gcgr	glucagon receptor	1	0	0	1	1
NM_008104	Gcm2	glial cells missing homolog 2 (Drosophila)	1	0	0	1	1
NM_008105	Gcnt2	glucosaminyl (N-acetyl) transferase 2, I-branching enzyme	1	0	0	1	1
NM_008112	Gdi2	guanosine diphosphate (GDP) dissociation inhibitor 2	1	0	0	1	1
NM_008153	Cmklr1	chemokine-like receptor 1	1	0	0	1	1
NM_008170	Grin2a	glutamate receptor, ionotropic, NMDA2A (epsilon 1)	1	0	0	1	1
[truncated: 1,463 more rows]

## Sheet: miR-204-5p
# "1" : interaction predicted; "0" : interaction not predicted.
[truncated: 2,134 more rows]

[truncated: 4 more sheets: miR-340-5p, miR-381-3p, miR-411-5p, miR-9-5p]
