# Supplementary material for: Identification of Circulating miRNAs in a Mouse Model of Nerve Allograft Transplantation under FK506 Immunosuppression by Illumina Small RNA Deep Sequencing
Source: Dis Markers. 2015 Sep 8;2015:863192. doi: 10.1155/2015/863192 (PMC4578739; doi:10.1155/2015/863192)
Supplement: Supplementary file 1 — Expression profile of the miRNAs by Illumina small RNA deep sequencing. [file 863192.f1.zip › 863192.f1/Supplementary file 3.xlsx]

## Sheet: biological process
Gene Ontology term	Cluster frequency	Genome frequency of use	Corrected P-value
cellular process	9352 out of 11937 genes, 78.3%	14907 out of 19550 genes, 76.3%	2.07e-14
regulation of signal transduction	970 out of 11937 genes, 8.1%	1376 out of 19550 genes, 7.0%	8.33e-11
regulation of response to stimulus	1306 out of 11937 genes, 10.9%	1895 out of 19550 genes, 9.7%	1.61e-10
organelle organization	1360 out of 11937 genes, 11.4%	1987 out of 19550 genes, 10.2%	1.2e-09
anatomical structure development	2900 out of 11937 genes, 24.3%	4416 out of 19550 genes, 22.6%	1.38e-09
regulation of metabolic process	2662 out of 11937 genes, 22.3%	4039 out of 19550 genes, 20.7%	1.92e-09
cellular component organization	2428 out of 11937 genes, 20.3%	3670 out of 19550 genes, 18.8%	3.01e-09
regulation of signaling	1165 out of 11937 genes, 9.8%	1691 out of 19550 genes, 8.6%	5.35e-09
cellular component organization or biogenesis	2512 out of 11937 genes, 21.0%	3809 out of 19550 genes, 19.5%	7.87e-09
cellular component organization at cellular level	1889 out of 11937 genes, 15.8%	2826 out of 19550 genes, 14.5%	1.27e-08
cellular component organization or biogenesis at cellular level	1973 out of 11937 genes, 16.5%	2965 out of 19550 genes, 15.2%	4.24e-08
regulation of primary metabolic process	2001 out of 11937 genes, 16.8%	3011 out of 19550 genes, 15.4%	5.83e-08
developmental process	3340 out of 11937 genes, 28.0%	5146 out of 19550 genes, 26.3%	7.22e-08
biological regulation	5926 out of 11937 genes, 49.6%	9337 out of 19550 genes, 47.8%	7.66e-08
multicellular organismal development	2655 out of 11937 genes, 22.2%	4051 out of 19550 genes, 20.7%	8e-08
localization	3122 out of 11937 genes, 26.2%	4803 out of 19550 genes, 24.6%	1.83e-07
regulation of cellular metabolic process	2053 out of 11937 genes, 17.2%	3104 out of 19550 genes, 15.9%	3.72e-07
cellular metabolic process	5231 out of 11937 genes, 43.8%	8218 out of 19550 genes, 42.0%	4.44e-07
cellular developmental process	1726 out of 11937 genes, 14.5%	2594 out of 19550 genes, 13.3%	1.19e-06
system development	2358 out of 11937 genes, 19.8%	3597 out of 19550 genes, 18.4%	1.48e-06
nervous system development	1036 out of 11937 genes, 8.7%	1515 out of 19550 genes, 7.7%	1.54e-06
macromolecule modification	1753 out of 11937 genes, 14.7%	2639 out of 19550 genes, 13.5%	1.82e-06
cellular macromolecule metabolic process	3576 out of 11937 genes, 30.0%	5551 out of 19550 genes, 28.4%	2.21e-06
intracellular signal transduction	971 out of 11937 genes, 8.1%	1416 out of 19550 genes, 7.2%	2.3e-06
enzyme linked receptor protein signaling pathway	651 out of 11937 genes, 5.5%	925 out of 19550 genes, 4.7%	3.1e-06
establishment of localization	2622 out of 11937 genes, 22.0%	4025 out of 19550 genes, 20.6%	4.11e-06
regulation of gene expression	1348 out of 11937 genes, 11.3%	2007 out of 19550 genes, 10.3%	4.67e-06
transport	2395 out of 11937 genes, 20.1%	3666 out of 19550 genes, 18.8%	6.59e-06
regulation of biological process	5398 out of 11937 genes, 45.2%	8516 out of 19550 genes, 43.6%	8.54e-06
regulation of nitrogen compound metabolic process	1517 out of 11937 genes, 12.7%	2276 out of 19550 genes, 11.6%	8.91e-06
regulation of cell cycle	416 out of 11937 genes, 3.5%	573 out of 19550 genes, 2.9%	9.59e-06
regulation of nucleobase-containing compound metabolic process	1503 out of 11937 genes, 12.6%	2255 out of 19550 genes, 11.5%	1.07e-05
vesicle-mediated transport	622 out of 11937 genes, 5.2%	886 out of 19550 genes, 4.5%	1.4e-05
macromolecule metabolic process	4256 out of 11937 genes, 35.7%	6666 out of 19550 genes, 34.1%	1.62e-05
cellular protein modification process	1624 out of 11937 genes, 13.6%	2449 out of 19550 genes, 12.5%	1.87e-05
protein modification process	1624 out of 11937 genes, 13.6%	2449 out of 19550 genes, 12.5%	1.87e-05
negative regulation of biological process	1356 out of 11937 genes, 11.4%	2027 out of 19550 genes, 10.4%	1.89e-05
transmembrane receptor protein tyrosine kinase signaling pathway	435 out of 11937 genes, 3.6%	604 out of 19550 genes, 3.1%	2.32e-05
regulation of RNA biosynthetic process	1151 out of 11937 genes, 9.6%	1707 out of 19550 genes, 8.7%	2.4e-05
metabolic process	6221 out of 11937 genes, 52.1%	9872 out of 19550 genes, 50.5%	2.77e-05
regulation of molecular function	1255 out of 11937 genes, 10.5%	1871 out of 19550 genes, 9.6%	3.02e-05
regulation of transcription, DNA-dependent	1143 out of 11937 genes, 9.6%	1697 out of 19550 genes, 8.7%	3.94e-05
regulation of RNA metabolic process	1153 out of 11937 genes, 9.7%	1713 out of 19550 genes, 8.8%	4.23e-05
regulation of macromolecule metabolic process	1818 out of 11937 genes, 15.2%	2764 out of 19550 genes, 14.1%	6.71e-05
primary metabolic process	5260 out of 11937 genes, 44.1%	8312 out of 19550 genes, 42.5%	7.9e-05
regulation of biological quality	1696 out of 11937 genes, 14.2%	2572 out of 19550 genes, 13.2%	8.27e-05
cytoskeleton organization	478 out of 11937 genes, 4.0%	673 out of 19550 genes, 3.4%	8.77e-05
regulation of cellular process	4820 out of 11937 genes, 40.4%	7599 out of 19550 genes, 38.9%	0.00011
phosphate-containing compound metabolic process	805 out of 11937 genes, 6.7%	1177 out of 19550 genes, 6.0%	0.00015
phosphorus metabolic process	808 out of 11937 genes, 6.8%	1183 out of 19550 genes, 6.1%	0.0002
regulation of cellular macromolecule biosynthetic process	1207 out of 11937 genes, 10.1%	1811 out of 19550 genes, 9.3%	0.00049
regulation of transmembrane transport	171 out of 11937 genes, 1.4%	221 out of 19550 genes, 1.1%	0.00057
regulation of cellular biosynthetic process	1309 out of 11937 genes, 11.0%	1973 out of 19550 genes, 10.1%	0.00062
urinary tract smooth muscle contraction	37 out of 11937 genes, 0.3%	38 out of 19550 genes, 0.2%	0.00063
positive regulation of biological process	1583 out of 11937 genes, 13.3%	2407 out of 19550 genes, 12.3%	0.00071
negative regulation of cellular process	1155 out of 11937 genes, 9.7%	1732 out of 19550 genes, 8.9%	0.00079
regulation of localization	627 out of 11937 genes, 5.3%	910 out of 19550 genes, 4.7%	0.00102
cellular component assembly	776 out of 11937 genes, 6.5%	1141 out of 19550 genes, 5.8%	0.00109
regulation of biosynthetic process	1350 out of 11937 genes, 11.3%	2043 out of 19550 genes, 10.5%	0.00146
regulation of mitotic cell cycle	153 out of 11937 genes, 1.3%	197 out of 19550 genes, 1.0%	0.00167
microtubule-based process	231 out of 11937 genes, 1.9%	311 out of 19550 genes, 1.6%	0.00182
regulation of cellular component organization	518 out of 11937 genes, 4.3%	745 out of 19550 genes, 3.8%	0.00201
anatomical structure morphogenesis	1239 out of 11937 genes, 10.4%	1870 out of 19550 genes, 9.6%	0.00209
regulation of protein phosphorylation	444 out of 11937 genes, 3.7%	632 out of 19550 genes, 3.2%	0.00213
regulation of phosphorylation	502 out of 11937 genes, 4.2%	721 out of 19550 genes, 3.7%	0.00232
regulation of protein metabolic process	627 out of 11937 genes, 5.3%	914 out of 19550 genes, 4.7%	0.00263
histone modification	218 out of 11937 genes, 1.8%	293 out of 19550 genes, 1.5%	0.00305
regulation of developmental process	778 out of 11937 genes, 6.5%	1150 out of 19550 genes, 5.9%	0.00371
positive regulation of cellular process	1318 out of 11937 genes, 11.0%	1999 out of 19550 genes, 10.2%	0.00408
regulation of macromolecule biosynthetic process	1261 out of 11937 genes, 10.6%	1909 out of 19550 genes, 9.8%	0.00414
regulation of cellular protein metabolic process	553 out of 11937 genes, 4.6%	802 out of 19550 genes, 4.1%	0.00448
peptidyl-lysine modification	118 out of 11937 genes, 1.0%	149 out of 19550 genes, 0.8%	0.00569
cellular component biogenesis	866 out of 11937 genes, 7.3%	1290 out of 19550 genes, 6.6%	0.00612
urinary bladder smooth muscle contraction	32 out of 11937 genes, 0.3%	33 out of 19550 genes, 0.2%	0.00661
regulation of phosphate metabolic process	513 out of 11937 genes, 4.3%	742 out of 19550 genes, 3.8%	0.00665
regulation of phosphorus metabolic process	513 out of 11937 genes, 4.3%	742 out of 19550 genes, 3.8%	0.00665
covalent chromatin modification	218 out of 11937 genes, 1.8%	295 out of 19550 genes, 1.5%	0.00714
chromatin modification	275 out of 11937 genes, 2.3%	380 out of 19550 genes, 1.9%	0.00719
nitrogen compound metabolic process	2482 out of 11937 genes, 20.8%	3862 out of 19550 genes, 19.8%	0.00898
regulation of growth	159 out of 11937 genes, 1.3%	209 out of 19550 genes, 1.1%	0.00986
transcription, DNA-dependent	816 out of 11937 genes, 6.8%	1215 out of 19550 genes, 6.2%	0.0112
RNA biosynthetic process	816 out of 11937 genes, 6.8%	1215 out of 19550 genes, 6.2%	0.0112
chordate embryonic development	381 out of 11937 genes, 3.2%	542 out of 19550 genes, 2.8%	0.0121
regulation of protein kinase activity	264 out of 11937 genes, 2.2%	365 out of 19550 genes, 1.9%	0.01229
regulation of protein modification process	510 out of 11937 genes, 4.3%	740 out of 19550 genes, 3.8%	0.01263
cell-cell junction organization	93 out of 11937 genes, 0.8%	115 out of 19550 genes, 0.6%	0.01368
apoptotic process	537 out of 11937 genes, 4.5%	783 out of 19550 genes, 4.0%	0.01726
pattern recognition receptor signaling pathway	97 out of 11937 genes, 0.8%	121 out of 19550 genes, 0.6%	0.01781
embryo development ending in birth or egg hatching	384 out of 11937 genes, 3.2%	548 out of 19550 genes, 2.8%	0.01809
regulation of transport	540 out of 11937 genes, 4.5%	788 out of 19550 genes, 4.0%	0.01876
regulation of RNA stability	41 out of 11937 genes, 0.3%	45 out of 19550 genes, 0.2%	0.02306
regulation of transferase activity	344 out of 11937 genes, 2.9%	488 out of 19550 genes, 2.5%	0.02396
regulation of intracellular protein transport	86 out of 11937 genes, 0.7%	106 out of 19550 genes, 0.5%	0.02457
anatomical structure formation involved in morphogenesis	427 out of 11937 genes, 3.6%	615 out of 19550 genes, 3.1%	0.02469
transmission of nerve impulse	256 out of 11937 genes, 2.1%	355 out of 19550 genes, 1.8%	0.025
multicellular organismal signaling	256 out of 11937 genes, 2.1%	355 out of 19550 genes, 1.8%	0.025
regulation of kinase activity	336 out of 11937 genes, 2.8%	476 out of 19550 genes, 2.4%	0.0252
regulation of catalytic activity	947 out of 11937 genes, 7.9%	1426 out of 19550 genes, 7.3%	0.02911
cell differentiation	1315 out of 11937 genes, 11.0%	2008 out of 19550 genes, 10.3%	0.03052
endosomal transport	53 out of 11937 genes, 0.4%	61 out of 19550 genes, 0.3%	0.03083
cellular nitrogen compound metabolic process	2396 out of 11937 genes, 20.1%	3736 out of 19550 genes, 19.1%	0.03321
regulation of mRNA stability	40 out of 11937 genes, 0.3%	44 out of 19550 genes, 0.2%	0.03458
cellular localization	969 out of 11937 genes, 8.1%	1462 out of 19550 genes, 7.5%	0.03632
nucleobase-containing compound metabolic process	2254 out of 11937 genes, 18.9%	3511 out of 19550 genes, 18.0%	0.04589
cellular protein metabolic process	2110 out of 11937 genes, 17.7%	3280 out of 19550 genes, 16.8%	0.04602
multicellular organismal process	4149 out of 11937 genes, 34.8%	6573 out of 19550 genes, 33.6%	0.04747
regulation of anatomical structure morphogenesis	198 out of 11937 genes, 1.7%	270 out of 19550 genes, 1.4%	0.04777
intracellular protein kinase cascade	409 out of 11937 genes, 3.4%	590 out of 19550 genes, 3.0%	0.04858
neurogenesis	514 out of 11937 genes, 4.3%	752 out of 19550 genes, 3.8%	0.04887
body fluid secretion	76 out of 11937 genes, 0.6%	93 out of 19550 genes, 0.5%	0.05056
regulation of cell cycle process	181 out of 11937 genes, 1.5%	245 out of 19550 genes, 1.3%	0.05271
muscle tissue development	174 out of 11937 genes, 1.5%	235 out of 19550 genes, 1.2%	0.06141
toll-like receptor signaling pathway	92 out of 11937 genes, 0.8%	116 out of 19550 genes, 0.6%	0.07084
posttranscriptional regulation of gene expression	175 out of 11937 genes, 1.5%	237 out of 19550 genes, 1.2%	0.07629
regulation of transcription factor import into nucleus	56 out of 11937 genes, 0.5%	66 out of 19550 genes, 0.3%	0.0805
activation of innate immune response	103 out of 11937 genes, 0.9%	132 out of 19550 genes, 0.7%	0.08503
innate immune response-activating signal transduction	103 out of 11937 genes, 0.9%	132 out of 19550 genes, 0.7%	0.08503
histone acetylation	96 out of 11937 genes, 0.8%	122 out of 19550 genes, 0.6%	0.08587
internal peptidyl-lysine acetylation	96 out of 11937 genes, 0.8%	122 out of 19550 genes, 0.6%	0.08587
peptidyl-lysine acetylation	96 out of 11937 genes, 0.8%	122 out of 19550 genes, 0.6%	0.08587
protein complex subunit organization	449 out of 11937 genes, 3.8%	654 out of 19550 genes, 3.3%	0.08681
embryo development	606 out of 11937 genes, 5.1%	898 out of 19550 genes, 4.6%	0.09212
regulation of GTPase activity	238 out of 11937 genes, 2.0%	332 out of 19550 genes, 1.7%	0.10141
cell volume homeostasis	26 out of 11937 genes, 0.2%	27 out of 19550 genes, 0.1%	0.10602
regulation of protein import into nucleus	76 out of 11937 genes, 0.6%	94 out of 19550 genes, 0.5%	0.10614
regulation of protein localization to nucleus	76 out of 11937 genes, 0.6%	94 out of 19550 genes, 0.5%	0.10614
regulation of ion transport	177 out of 11937 genes, 1.5%	241 out of 19550 genes, 1.2%	0.11604
programmed cell death	757 out of 11937 genes, 6.3%	1136 out of 19550 genes, 5.8%	0.12537
regulation of GTP catabolic process	240 out of 11937 genes, 2.0%	336 out of 19550 genes, 1.7%	0.14033
generation of neurons	472 out of 11937 genes, 4.0%	692 out of 19550 genes, 3.5%	0.14981
establishment of localization in cell	861 out of 11937 genes, 7.2%	1301 out of 19550 genes, 6.7%	0.1573
cell-cell junction assembly	54 out of 11937 genes, 0.5%	64 out of 19550 genes, 0.3%	0.15736
positive regulation of protein phosphorylation	247 out of 11937 genes, 2.1%	347 out of 19550 genes, 1.8%	0.16044
positive regulation of phosphorus metabolic process	247 out of 11937 genes, 2.1%	347 out of 19550 genes, 1.8%	0.16044
positive regulation of phosphorylation	247 out of 11937 genes, 2.1%	347 out of 19550 genes, 1.8%	0.16044
positive regulation of phosphate metabolic process	247 out of 11937 genes, 2.1%	347 out of 19550 genes, 1.8%	0.16044
regulation of purine nucleotide metabolic process	297 out of 11937 genes, 2.5%	423 out of 19550 genes, 2.2%	0.16153
muscle structure development	183 out of 11937 genes, 1.5%	251 out of 19550 genes, 1.3%	0.17538
cell junction assembly	100 out of 11937 genes, 0.8%	129 out of 19550 genes, 0.7%	0.18104
histone H4 acetylation	20 out of 11937 genes, 0.2%	20 out of 19550 genes, 0.1%	0.18451
protein metabolic process	2528 out of 11937 genes, 21.2%	3966 out of 19550 genes, 20.3%	0.19094
neural tube formation	69 out of 11937 genes, 0.6%	85 out of 19550 genes, 0.4%	0.19177
cellular component assembly at cellular level	404 out of 11937 genes, 3.4%	588 out of 19550 genes, 3.0%	0.196
negative regulation of macromolecule metabolic process	339 out of 11937 genes, 2.8%	488 out of 19550 genes, 2.5%	0.19794
cell-cell signaling	545 out of 11937 genes, 4.6%	807 out of 19550 genes, 4.1%	0.20635
cellular biosynthetic process	1646 out of 11937 genes, 13.8%	2552 out of 19550 genes, 13.1%	0.24142
neuromuscular process	58 out of 11937 genes, 0.5%	70 out of 19550 genes, 0.4%	0.24358
nucleic acid metabolic process	1714 out of 11937 genes, 14.4%	2661 out of 19550 genes, 13.6%	0.24681
regulation of intracellular transport	112 out of 11937 genes, 0.9%	147 out of 19550 genes, 0.8%	0.25241
smooth muscle contraction	68 out of 11937 genes, 0.6%	84 out of 19550 genes, 0.4%	0.25716
protein acetylation	105 out of 11937 genes, 0.9%	137 out of 19550 genes, 0.7%	0.2759
regulation of body fluid levels	434 out of 11937 genes, 3.6%	636 out of 19550 genes, 3.3%	0.28233
cell junction organization	160 out of 11937 genes, 1.3%	218 out of 19550 genes, 1.1%	0.28836
regulation of cell development	243 out of 11937 genes, 2.0%	343 out of 19550 genes, 1.8%	0.30539
protein complex assembly	415 out of 11937 genes, 3.5%	607 out of 19550 genes, 3.1%	0.31009
protein complex biogenesis	415 out of 11937 genes, 3.5%	607 out of 19550 genes, 3.1%	0.31009
primary neural tube formation	67 out of 11937 genes, 0.6%	83 out of 19550 genes, 0.4%	0.34398
regulation of cell growth	62 out of 11937 genes, 0.5%	76 out of 19550 genes, 0.4%	0.34541
cell death	781 out of 11937 genes, 6.5%	1180 out of 19550 genes, 6.0%	0.35011
death	781 out of 11937 genes, 6.5%	1180 out of 19550 genes, 6.0%	0.35011
protein acylation	106 out of 11937 genes, 0.9%	139 out of 19550 genes, 0.7%	0.36666
internal protein amino acid acetylation	97 out of 11937 genes, 0.8%	126 out of 19550 genes, 0.6%	0.37828
central nervous system development	500 out of 11937 genes, 4.2%	740 out of 19550 genes, 3.8%	0.38295
mechanoreceptor differentiation	43 out of 11937 genes, 0.4%	50 out of 19550 genes, 0.3%	0.38366
actin filament-based process	228 out of 11937 genes, 1.9%	321 out of 19550 genes, 1.6%	0.3848
regulation of cell differentiation	619 out of 11937 genes, 5.2%	926 out of 19550 genes, 4.7%	0.38662
locomotion	756 out of 11937 genes, 6.3%	1142 out of 19550 genes, 5.8%	0.43594
positive regulation of transferase activity	174 out of 11937 genes, 1.5%	240 out of 19550 genes, 1.2%	0.43878
regulation of nucleotide metabolic process	301 out of 11937 genes, 2.5%	433 out of 19550 genes, 2.2%	0.46633
regulation of sequence-specific DNA binding transcription factor activity	120 out of 11937 genes, 1.0%	160 out of 19550 genes, 0.8%	0.47354
positive regulation of sequence-specific DNA binding transcription factor activity	89 out of 11937 genes, 0.7%	115 out of 19550 genes, 0.6%	0.51453
tube formation	91 out of 11937 genes, 0.8%	118 out of 19550 genes, 0.6%	0.54744
synaptic transmission	192 out of 11937 genes, 1.6%	268 out of 19550 genes, 1.4%	0.61045
brain development	312 out of 11937 genes, 2.6%	451 out of 19550 genes, 2.3%	0.61966
positive regulation of kinase activity	170 out of 11937 genes, 1.4%	235 out of 19550 genes, 1.2%	0.62989
positive regulation of innate immune response	112 out of 11937 genes, 0.9%	149 out of 19550 genes, 0.8%	0.67013
regulation of nucleotide catabolic process	268 out of 11937 genes, 2.2%	384 out of 19550 genes, 2.0%	0.70507
regulation of purine nucleotide catabolic process	268 out of 11937 genes, 2.2%	384 out of 19550 genes, 2.0%	0.70507
positive regulation of growth	52 out of 11937 genes, 0.4%	63 out of 19550 genes, 0.3%	0.70735
negative regulation of metabolic process	388 out of 11937 genes, 3.3%	569 out of 19550 genes, 2.9%	0.72262
protein deacylation	49 out of 11937 genes, 0.4%	59 out of 19550 genes, 0.3%	0.8018
positive regulation of cell growth	32 out of 11937 genes, 0.3%	36 out of 19550 genes, 0.2%	0.81438
regulation of NF-kappaB import into nucleus	32 out of 11937 genes, 0.3%	36 out of 19550 genes, 0.2%	0.81438
regulation of organelle organization	227 out of 11937 genes, 1.9%	322 out of 19550 genes, 1.6%	0.82807
muscle cell differentiation	138 out of 11937 genes, 1.2%	188 out of 19550 genes, 1.0%	0.85666
cell communication	3091 out of 11937 genes, 25.9%	4893 out of 19550 genes, 25.0%	0.86014
negative regulation of signal transduction	219 out of 11937 genes, 1.8%	310 out of 19550 genes, 1.6%	0.87014
regulation of transcription from RNA polymerase II promoter	663 out of 11937 genes, 5.6%	1000 out of 19550 genes, 5.1%	0.88474
metal ion transport	510 out of 11937 genes, 4.3%	760 out of 19550 genes, 3.9%	0.89114
positive regulation of protein metabolic process	300 out of 11937 genes, 2.5%	434 out of 19550 genes, 2.2%	0.89176
regulation of cell communication	661 out of 11937 genes, 5.5%	997 out of 19550 genes, 5.1%	0.90601
biosynthetic process	1752 out of 11937 genes, 14.7%	2735 out of 19550 genes, 14.0%	0.96277
ovulation cycle	95 out of 11937 genes, 0.8%	125 out of 19550 genes, 0.6%	1
erythrocyte homeostasis	21 out of 11937 genes, 0.2%	22 out of 19550 genes, 0.1%	1
positive regulation of defense response	145 out of 11937 genes, 1.2%	199 out of 19550 genes, 1.0%	1
regulation of cell projection organization	157 out of 11937 genes, 1.3%	217 out of 19550 genes, 1.1%	1
cellular macromolecule biosynthetic process	1302 out of 11937 genes, 10.9%	2016 out of 19550 genes, 10.3%	1
macromolecule biosynthetic process	1325 out of 11937 genes, 11.1%	2053 out of 19550 genes, 10.5%	1
RNA metabolic process	1283 out of 11937 genes, 10.7%	1986 out of 19550 genes, 10.2%	1
ovulation cycle process	94 out of 11937 genes, 0.8%	124 out of 19550 genes, 0.6%	1
activation of protein kinase activity	94 out of 11937 genes, 0.8%	124 out of 19550 genes, 0.6%	1
regulation of catabolic process	383 out of 11937 genes, 3.2%	564 out of 19550 genes, 2.9%	1
organ development	1564 out of 11937 genes, 13.1%	2437 out of 19550 genes, 12.5%	1
mammary gland epithelial cell proliferation	24 out of 11937 genes, 0.2%	26 out of 19550 genes, 0.1%	1
macromolecular complex assembly	567 out of 11937 genes, 4.7%	852 out of 19550 genes, 4.4%	1
ion homeostasis	512 out of 11937 genes, 4.3%	766 out of 19550 genes, 3.9%	1
monovalent inorganic cation homeostasis	47 out of 11937 genes, 0.4%	57 out of 19550 genes, 0.3%	1
regulation of Ras protein signal transduction	163 out of 11937 genes, 1.4%	227 out of 19550 genes, 1.2%	1
positive regulation of protein kinase activity	149 out of 11937 genes, 1.2%	206 out of 19550 genes, 1.1%	1
phosphorylation	327 out of 11937 genes, 2.7%	478 out of 19550 genes, 2.4%	1
organelle localization	108 out of 11937 genes, 0.9%	145 out of 19550 genes, 0.7%	1
erythrocyte differentiation	20 out of 11937 genes, 0.2%	21 out of 19550 genes, 0.1%	1
negative regulation of cellular metabolic process	299 out of 11937 genes, 2.5%	435 out of 19550 genes, 2.2%	1
response to ionizing radiation	73 out of 11937 genes, 0.6%	94 out of 19550 genes, 0.5%	1
regulation of microtubule-based process	44 out of 11937 genes, 0.4%	53 out of 19550 genes, 0.3%	1
regulation of nervous system development	174 out of 11937 genes, 1.5%	244 out of 19550 genes, 1.2%	1
regulation of small GTPase mediated signal transduction	166 out of 11937 genes, 1.4%	232 out of 19550 genes, 1.2%	1
regulation of transmembrane transporter activity	86 out of 11937 genes, 0.7%	113 out of 19550 genes, 0.6%	1
chromatin organization	425 out of 11937 genes, 3.6%	631 out of 19550 genes, 3.2%	1
regulation of multicellular organismal development	453 out of 11937 genes, 3.8%	675 out of 19550 genes, 3.5%	1
ion transport	763 out of 11937 genes, 6.4%	1163 out of 19550 genes, 5.9%	1
regulation of hydrolase activity	563 out of 11937 genes, 4.7%	848 out of 19550 genes, 4.3%	1
positive regulation of programmed cell death	375 out of 11937 genes, 3.1%	554 out of 19550 genes, 2.8%	1
regulation of ion transmembrane transporter activity	85 out of 11937 genes, 0.7%	112 out of 19550 genes, 0.6%	1
negative regulation of signaling	224 out of 11937 genes, 1.9%	321 out of 19550 genes, 1.6%	1
positive regulation of cell death	378 out of 11937 genes, 3.2%	559 out of 19550 genes, 2.9%	1
positive regulation of developmental process	300 out of 11937 genes, 2.5%	438 out of 19550 genes, 2.2%	1
inner ear receptor cell differentiation	35 out of 11937 genes, 0.3%	41 out of 19550 genes, 0.2%	1
establishment of organelle localization	67 out of 11937 genes, 0.6%	86 out of 19550 genes, 0.4%	1
cell part morphogenesis	172 out of 11937 genes, 1.4%	242 out of 19550 genes, 1.2%	1
cell projection morphogenesis	172 out of 11937 genes, 1.4%	242 out of 19550 genes, 1.2%	1
muscle organ development	89 out of 11937 genes, 0.7%	118 out of 19550 genes, 0.6%	1
mammary gland development	26 out of 11937 genes, 0.2%	29 out of 19550 genes, 0.1%	1
mammary gland epithelium development	26 out of 11937 genes, 0.2%	29 out of 19550 genes, 0.1%	1
regulation of protein localization	122 out of 11937 genes, 1.0%	167 out of 19550 genes, 0.9%	1
cation transport	548 out of 11937 genes, 4.6%	826 out of 19550 genes, 4.2%	1
positive regulation of response to stimulus	483 out of 11937 genes, 4.0%	724 out of 19550 genes, 3.7%	1
embryonic epithelial tube formation	82 out of 11937 genes, 0.7%	108 out of 19550 genes, 0.6%	1
epithelial tube formation	82 out of 11937 genes, 0.7%	108 out of 19550 genes, 0.6%	1
positive regulation of protein modification process	258 out of 11937 genes, 2.2%	374 out of 19550 genes, 1.9%	1
I-kappaB kinase/NF-kappaB cascade	161 out of 11937 genes, 1.3%	226 out of 19550 genes, 1.2%	1
regulation of multicellular organismal process	958 out of 11937 genes, 8.0%	1476 out of 19550 genes, 7.5%	1
regulation of ion transmembrane transport	88 out of 11937 genes, 0.7%	117 out of 19550 genes, 0.6%	1
cell cycle process	649 out of 11937 genes, 5.4%	986 out of 19550 genes, 5.0%	1
secretion	370 out of 11937 genes, 3.1%	548 out of 19550 genes, 2.8%	1
divalent inorganic cation transport	170 out of 11937 genes, 1.4%	240 out of 19550 genes, 1.2%	1
chemotaxis	362 out of 11937 genes, 3.0%	536 out of 19550 genes, 2.7%	1
taxis	362 out of 11937 genes, 3.0%	536 out of 19550 genes, 2.7%	1
cell proliferation	749 out of 11937 genes, 6.3%	1145 out of 19550 genes, 5.9%	1
protein oligomerization	249 out of 11937 genes, 2.1%	361 out of 19550 genes, 1.8%	1
negative regulation of transferase activity	102 out of 11937 genes, 0.9%	138 out of 19550 genes, 0.7%	1
peptidyl-amino acid modification	219 out of 11937 genes, 1.8%	315 out of 19550 genes, 1.6%	1
positive regulation of cellular protein metabolic process	258 out of 11937 genes, 2.2%	375 out of 19550 genes, 1.9%	1
gland development	104 out of 11937 genes, 0.9%	141 out of 19550 genes, 0.7%	1
regulation of muscle system process	72 out of 11937 genes, 0.6%	94 out of 19550 genes, 0.5%	1
negative regulation of cell projection organization	44 out of 11937 genes, 0.4%	54 out of 19550 genes, 0.3%	1
divalent metal ion transport	169 out of 11937 genes, 1.4%	239 out of 19550 genes, 1.2%	1
regulation of neurogenesis	163 out of 11937 genes, 1.4%	230 out of 19550 genes, 1.2%	1
morphogenesis of embryonic epithelium	99 out of 11937 genes, 0.8%	134 out of 19550 genes, 0.7%	1
striated muscle tissue development	149 out of 11937 genes, 1.2%	209 out of 19550 genes, 1.1%	1
negative regulation of cell communication	225 out of 11937 genes, 1.9%	325 out of 19550 genes, 1.7%	1
inositol lipid-mediated signaling	69 out of 11937 genes, 0.6%	90 out of 19550 genes, 0.5%	1
regulation of neuron differentiation	105 out of 11937 genes, 0.9%	143 out of 19550 genes, 0.7%	1
immune response-activating signal transduction	164 out of 11937 genes, 1.4%	232 out of 19550 genes, 1.2%	1
positive regulation of immune system process	341 out of 11937 genes, 2.9%	505 out of 19550 genes, 2.6%	1
activation of immune response	183 out of 11937 genes, 1.5%	261 out of 19550 genes, 1.3%	1
visual behavior	48 out of 11937 genes, 0.4%	60 out of 19550 genes, 0.3%	1
regulation of B cell proliferation	55 out of 11937 genes, 0.5%	70 out of 19550 genes, 0.4%	1
negative regulation of growth	38 out of 11937 genes, 0.3%	46 out of 19550 genes, 0.2%	1
positive regulation of cell differentiation	279 out of 11937 genes, 2.3%	409 out of 19550 genes, 2.1%	1
regulation of Wnt receptor signaling pathway	100 out of 11937 genes, 0.8%	136 out of 19550 genes, 0.7%	1
positive regulation of cellular component organization	165 out of 11937 genes, 1.4%	234 out of 19550 genes, 1.2%	1
microtubule cytoskeleton organization	124 out of 11937 genes, 1.0%	172 out of 19550 genes, 0.9%	1
regulation of Ras GTPase activity	120 out of 11937 genes, 1.0%	166 out of 19550 genes, 0.8%	1
DNA damage response, signal transduction resulting in induction of apoptosis	35 out of 11937 genes, 0.3%	42 out of 19550 genes, 0.2%	1
protein sumoylation	13 out of 11937 genes, 0.1%	13 out of 19550 genes, 0.1%	1
response to lipoteichoic acid	13 out of 11937 genes, 0.1%	13 out of 19550 genes, 0.1%	1
positive regulation of molecular function	468 out of 11937 genes, 3.9%	705 out of 19550 genes, 3.6%	1
actin cytoskeleton organization	204 out of 11937 genes, 1.7%	294 out of 19550 genes, 1.5%	1
negative regulation of kinase activity	93 out of 11937 genes, 0.8%	126 out of 19550 genes, 0.6%	1
positive regulation of immune response	200 out of 11937 genes, 1.7%	288 out of 19550 genes, 1.5%	1
negative regulation of intracellular protein transport	32 out of 11937 genes, 0.3%	38 out of 19550 genes, 0.2%	1
regulation of protein transport	115 out of 11937 genes, 1.0%	159 out of 19550 genes, 0.8%	1
regulation of establishment of protein localization	115 out of 11937 genes, 1.0%	159 out of 19550 genes, 0.8%	1
protein deacetylation	37 out of 11937 genes, 0.3%	45 out of 19550 genes, 0.2%	1
negative regulation of cell adhesion	37 out of 11937 genes, 0.3%	45 out of 19550 genes, 0.2%	1
regulation of programmed cell death	604 out of 11937 genes, 5.1%	921 out of 19550 genes, 4.7%	1
cellular response to growth factor stimulus	44 out of 11937 genes, 0.4%	55 out of 19550 genes, 0.3%	1
proteoglycan metabolic process	34 out of 11937 genes, 0.3%	41 out of 19550 genes, 0.2%	1
regulation of innate immune response	116 out of 11937 genes, 1.0%	161 out of 19550 genes, 0.8%	1
regulation of immune system process	534 out of 11937 genes, 4.5%	811 out of 19550 genes, 4.1%	1
transmembrane transport	293 out of 11937 genes, 2.5%	433 out of 19550 genes, 2.2%	1
cellular component morphogenesis	396 out of 11937 genes, 3.3%	594 out of 19550 genes, 3.0%	1
cation homeostasis	346 out of 11937 genes, 2.9%	516 out of 19550 genes, 2.6%	1
regulation of cell death	624 out of 11937 genes, 5.2%	954 out of 19550 genes, 4.9%	1
deoxyribonucleoside triphosphate metabolic process	12 out of 11937 genes, 0.1%	12 out of 19550 genes, 0.1%	1
regulation of macrophage cytokine production	12 out of 11937 genes, 0.1%	12 out of 19550 genes, 0.1%	1
response to bacterial lipoprotein	12 out of 11937 genes, 0.1%	12 out of 19550 genes, 0.1%	1
regulation of toll-like receptor signaling pathway	12 out of 11937 genes, 0.1%	12 out of 19550 genes, 0.1%	1
regulation of synapse structure and activity	12 out of 11937 genes, 0.1%	12 out of 19550 genes, 0.1%	1
regulation of synapse organization	12 out of 11937 genes, 0.1%	12 out of 19550 genes, 0.1%	1
response to bacterial lipopeptide	12 out of 11937 genes, 0.1%	12 out of 19550 genes, 0.1%	1
regulation of cytokine production involved in immune response	16 out of 11937 genes, 0.1%	17 out of 19550 genes, 0.1%	1
regulation of cellular catabolic process	331 out of 11937 genes, 2.8%	493 out of 19550 genes, 2.5%	1
response to inorganic substance	338 out of 11937 genes, 2.8%	504 out of 19550 genes, 2.6%	1
endocytosis	144 out of 11937 genes, 1.2%	204 out of 19550 genes, 1.0%	1
neural tube development	72 out of 11937 genes, 0.6%	96 out of 19550 genes, 0.5%	1
tyrosine phosphorylation of Stat5 protein	28 out of 11937 genes, 0.2%	33 out of 19550 genes, 0.2%	1
glycoprotein metabolic process	174 out of 11937 genes, 1.5%	250 out of 19550 genes, 1.3%	1
exocytosis	155 out of 11937 genes, 1.3%	221 out of 19550 genes, 1.1%	1
carbohydrate derivative biosynthetic process	153 out of 11937 genes, 1.3%	218 out of 19550 genes, 1.1%	1
chromosome organization	510 out of 11937 genes, 4.3%	775 out of 19550 genes, 4.0%	1
regulation of nucleocytoplasmic transport	82 out of 11937 genes, 0.7%	111 out of 19550 genes, 0.6%	1
mucosal-associated lymphoid tissue development	19 out of 11937 genes, 0.2%	21 out of 19550 genes, 0.1%	1
morphogenesis of a branching epithelium	45 out of 11937 genes, 0.4%	57 out of 19550 genes, 0.3%	1
response to growth factor stimulus	88 out of 11937 genes, 0.7%	120 out of 19550 genes, 0.6%	1
regulation of transporter activity	92 out of 11937 genes, 0.8%	126 out of 19550 genes, 0.6%	1
cellular response to organic substance	223 out of 11937 genes, 1.9%	326 out of 19550 genes, 1.7%	1
glycoprotein biosynthetic process	137 out of 11937 genes, 1.1%	194 out of 19550 genes, 1.0%	1
induction of programmed cell death	336 out of 11937 genes, 2.8%	502 out of 19550 genes, 2.6%	1
negative regulation of gene expression	230 out of 11937 genes, 1.9%	337 out of 19550 genes, 1.7%	1
microtubule organizing center organization	30 out of 11937 genes, 0.3%	36 out of 19550 genes, 0.2%	1
negative regulation of protein import into nucleus	30 out of 11937 genes, 0.3%	36 out of 19550 genes, 0.2%	1
nuclear export	73 out of 11937 genes, 0.6%	98 out of 19550 genes, 0.5%	1
negative regulation of transcription from RNA polymerase II promoter	161 out of 11937 genes, 1.3%	231 out of 19550 genes, 1.2%	1
positive regulation of cell projection organization	60 out of 11937 genes, 0.5%	79 out of 19550 genes, 0.4%	1
cell cycle	724 out of 11937 genes, 6.1%	1116 out of 19550 genes, 5.7%	1
vacuolar transport	42 out of 11937 genes, 0.4%	53 out of 19550 genes, 0.3%	1
neuron differentiation	333 out of 11937 genes, 2.8%	498 out of 19550 genes, 2.5%	1
negative regulation of cellular protein metabolic process	85 out of 11937 genes, 0.7%	116 out of 19550 genes, 0.6%	1
regulation of muscle contraction	62 out of 11937 genes, 0.5%	82 out of 19550 genes, 0.4%	1
positive regulation of phospholipase C activity	64 out of 11937 genes, 0.5%	85 out of 19550 genes, 0.4%	1
regulation of phospholipase C activity	64 out of 11937 genes, 0.5%	85 out of 19550 genes, 0.4%	1
chemical homeostasis	616 out of 11937 genes, 5.2%	945 out of 19550 genes, 4.8%	1
negative regulation of nucleobase-containing compound metabolic process	190 out of 11937 genes, 1.6%	276 out of 19550 genes, 1.4%	1
negative regulation of nitrogen compound metabolic process	190 out of 11937 genes, 1.6%	276 out of 19550 genes, 1.4%	1
regulation of response to stress	302 out of 11937 genes, 2.5%	450 out of 19550 genes, 2.3%	1
negative regulation of RNA metabolic process	188 out of 11937 genes, 1.6%	273 out of 19550 genes, 1.4%	1
cell development	571 out of 11937 genes, 4.8%	874 out of 19550 genes, 4.5%	1
hemostasis	360 out of 11937 genes, 3.0%	541 out of 19550 genes, 2.8%	1
positive regulation of phospholipase activity	70 out of 11937 genes, 0.6%	94 out of 19550 genes, 0.5%	1
positive regulation of lipase activity	70 out of 11937 genes, 0.6%	94 out of 19550 genes, 0.5%	1
regulation of vesicle-mediated transport	118 out of 11937 genes, 1.0%	166 out of 19550 genes, 0.8%	1
establishment of mitochondrion localization, microtubule-mediated	11 out of 11937 genes, 0.1%	11 out of 19550 genes, 0.1%	1
establishment of mitochondrion localization	11 out of 11937 genes, 0.1%	11 out of 19550 genes, 0.1%	1
regulation of T cell apoptotic process	11 out of 11937 genes, 0.1%	11 out of 19550 genes, 0.1%	1
regulation of lipase activity	86 out of 11937 genes, 0.7%	118 out of 19550 genes, 0.6%	1
cellular monovalent inorganic cation homeostasis	21 out of 11937 genes, 0.2%	24 out of 19550 genes, 0.1%	1
regulation of cellular pH	21 out of 11937 genes, 0.2%	24 out of 19550 genes, 0.1%	1
calcium ion transport	94 out of 11937 genes, 0.8%	130 out of 19550 genes, 0.7%	1
RNA stabilization	18 out of 11937 genes, 0.2%	20 out of 19550 genes, 0.1%	1
mRNA stabilization	18 out of 11937 genes, 0.2%	20 out of 19550 genes, 0.1%	1
appendage development	131 out of 11937 genes, 1.1%	186 out of 19550 genes, 1.0%	1
cellular chemical homeostasis	477 out of 11937 genes, 4.0%	726 out of 19550 genes, 3.7%	1
lysosomal transport	29 out of 11937 genes, 0.2%	35 out of 19550 genes, 0.2%	1
regulation of immune response	245 out of 11937 genes, 2.1%	362 out of 19550 genes, 1.9%	1
ensheathment of neurons	67 out of 11937 genes, 0.6%	90 out of 19550 genes, 0.5%	1
regulation of action potential in neuron	67 out of 11937 genes, 0.6%	90 out of 19550 genes, 0.5%	1
cellular ion homeostasis	467 out of 11937 genes, 3.9%	711 out of 19550 genes, 3.6%	1
regulation of phospholipase activity	73 out of 11937 genes, 0.6%	99 out of 19550 genes, 0.5%	1
epithelial cell proliferation	103 out of 11937 genes, 0.9%	144 out of 19550 genes, 0.7%	1
negative regulation of protein modification process	75 out of 11937 genes, 0.6%	102 out of 19550 genes, 0.5%	1
negative regulation of cell growth	26 out of 11937 genes, 0.2%	31 out of 19550 genes, 0.2%	1
fibroblast growth factor receptor signaling pathway	31 out of 11937 genes, 0.3%	38 out of 19550 genes, 0.2%	1
cellular response to fibroblast growth factor stimulus	31 out of 11937 genes, 0.3%	38 out of 19550 genes, 0.2%	1
regulation of microtubule cytoskeleton organization	31 out of 11937 genes, 0.3%	38 out of 19550 genes, 0.2%	1
response to fibroblast growth factor stimulus	31 out of 11937 genes, 0.3%	38 out of 19550 genes, 0.2%	1
positive regulation of macromolecule metabolic process	362 out of 11937 genes, 3.0%	546 out of 19550 genes, 2.8%	1
muscle contraction	154 out of 11937 genes, 1.3%	222 out of 19550 genes, 1.1%	1
immune response-regulating signaling pathway	167 out of 11937 genes, 1.4%	242 out of 19550 genes, 1.2%	1
cell activation	481 out of 11937 genes, 4.0%	734 out of 19550 genes, 3.8%	1
regulation of type I interferon production	23 out of 11937 genes, 0.2%	27 out of 19550 genes, 0.1%	1
homeostatic process	832 out of 11937 genes, 7.0%	1293 out of 19550 genes, 6.6%	1
glandular epithelial cell differentiation	14 out of 11937 genes, 0.1%	15 out of 19550 genes, 0.1%	1
negative regulation of intracellular transport	33 out of 11937 genes, 0.3%	41 out of 19550 genes, 0.2%	1
regulation of pH	28 out of 11937 genes, 0.2%	34 out of 19550 genes, 0.2%	1
homeostasis of number of cells	88 out of 11937 genes, 0.7%	122 out of 19550 genes, 0.6%	1
histone methylation	53 out of 11937 genes, 0.4%	70 out of 19550 genes, 0.4%	1
nucleobase-containing compound transport	134 out of 11937 genes, 1.1%	192 out of 19550 genes, 1.0%	1
behavior	372 out of 11937 genes, 3.1%	563 out of 19550 genes, 2.9%	1
natural killer cell mediated cytotoxicity directed against tumor cell target	10 out of 11937 genes, 0.1%	10 out of 19550 genes, 0.1%	1
natural killer cell mediated immune response to tumor cell	10 out of 11937 genes, 0.1%	10 out of 19550 genes, 0.1%	1
regulation of translational termination	10 out of 11937 genes, 0.1%	10 out of 19550 genes, 0.1%	1
purine deoxyribonucleotide metabolic process	10 out of 11937 genes, 0.1%	10 out of 19550 genes, 0.1%	1
heparan sulfate proteoglycan biosynthetic process	10 out of 11937 genes, 0.1%	10 out of 19550 genes, 0.1%	1
heparan sulfate proteoglycan metabolic process	10 out of 11937 genes, 0.1%	10 out of 19550 genes, 0.1%	1
natural killer cell mediated cytotoxicity	10 out of 11937 genes, 0.1%	10 out of 19550 genes, 0.1%	1
cytoplasmic sequestering of transcription factor	10 out of 11937 genes, 0.1%	10 out of 19550 genes, 0.1%	1
cytoplasmic sequestering of protein	10 out of 11937 genes, 0.1%	10 out of 19550 genes, 0.1%	1
intracellular transport	569 out of 11937 genes, 4.8%	875 out of 19550 genes, 4.5%	1
formation of primary germ layer	59 out of 11937 genes, 0.5%	79 out of 19550 genes, 0.4%	1
negative regulation of response to stimulus	275 out of 11937 genes, 2.3%	411 out of 19550 genes, 2.1%	1
autophagy	25 out of 11937 genes, 0.2%	30 out of 19550 genes, 0.2%	1
regulation of defense response	246 out of 11937 genes, 2.1%	366 out of 19550 genes, 1.9%	1
regulation of neuron projection development	87 out of 11937 genes, 0.7%	121 out of 19550 genes, 0.6%	1
negative regulation of developmental process	228 out of 11937 genes, 1.9%	338 out of 19550 genes, 1.7%	1
gastrulation	75 out of 11937 genes, 0.6%	103 out of 19550 genes, 0.5%	1
response to abiotic stimulus	410 out of 11937 genes, 3.4%	624 out of 19550 genes, 3.2%	1
muscle system process	235 out of 11937 genes, 2.0%	349 out of 19550 genes, 1.8%	1
negative regulation of protein transport	32 out of 11937 genes, 0.3%	40 out of 19550 genes, 0.2%	1
gene expression	1750 out of 11937 genes, 14.7%	2773 out of 19550 genes, 14.2%	1
purine ribonucleoside monophosphate metabolic process	22 out of 11937 genes, 0.2%	26 out of 19550 genes, 0.1%	1
regulation of microtubule polymerization or depolymerization	22 out of 11937 genes, 0.2%	26 out of 19550 genes, 0.1%	1
positive regulation of RNA metabolic process	22 out of 11937 genes, 0.2%	26 out of 19550 genes, 0.1%	1
appendage morphogenesis	125 out of 11937 genes, 1.0%	179 out of 19550 genes, 0.9%	1
rhythmic process	184 out of 11937 genes, 1.5%	270 out of 19550 genes, 1.4%	1
ribonucleotide biosynthetic process	102 out of 11937 genes, 0.9%	144 out of 19550 genes, 0.7%	1
inner ear development	58 out of 11937 genes, 0.5%	78 out of 19550 genes, 0.4%	1
protein phosphorylation	248 out of 11937 genes, 2.1%	370 out of 19550 genes, 1.9%	1
regulation of Rab GTPase activity	34 out of 11937 genes, 0.3%	43 out of 19550 genes, 0.2%	1
regulation of Rab protein signal transduction	34 out of 11937 genes, 0.3%	43 out of 19550 genes, 0.2%	1
regulation of striated muscle tissue development	62 out of 11937 genes, 0.5%	84 out of 19550 genes, 0.4%	1
regulation of Rho GTPase activity	62 out of 11937 genes, 0.5%	84 out of 19550 genes, 0.4%	1
regulation of Rho protein signal transduction	62 out of 11937 genes, 0.5%	84 out of 19550 genes, 0.4%	1
mitochondrion organization	88 out of 11937 genes, 0.7%	123 out of 19550 genes, 0.6%	1
negative regulation of cell differentiation	214 out of 11937 genes, 1.8%	317 out of 19550 genes, 1.6%	1
tissue morphogenesis	262 out of 11937 genes, 2.2%	392 out of 19550 genes, 2.0%	1
proteoglycan biosynthetic process	19 out of 11937 genes, 0.2%	22 out of 19550 genes, 0.1%	1
gene silencing by miRNA	19 out of 11937 genes, 0.2%	22 out of 19550 genes, 0.1%	1
regulation of antigen receptor-mediated signaling pathway	19 out of 11937 genes, 0.2%	22 out of 19550 genes, 0.1%	1
ectodermal placode formation	19 out of 11937 genes, 0.2%	22 out of 19550 genes, 0.1%	1
ectodermal placode development	19 out of 11937 genes, 0.2%	22 out of 19550 genes, 0.1%	1
ectodermal placode morphogenesis	19 out of 11937 genes, 0.2%	22 out of 19550 genes, 0.1%	1
extracellular structure organization	128 out of 11937 genes, 1.1%	184 out of 19550 genes, 0.9%	1
negative regulation of muscle contraction	13 out of 11937 genes, 0.1%	14 out of 19550 genes, 0.1%	1
actin polymerization or depolymerization	45 out of 11937 genes, 0.4%	59 out of 19550 genes, 0.3%	1
epithelial tube morphogenesis	109 out of 11937 genes, 0.9%	155 out of 19550 genes, 0.8%	1
negative regulation of cellular macromolecule biosynthetic process	183 out of 11937 genes, 1.5%	269 out of 19550 genes, 1.4%	1
regulation of skeletal muscle tissue development	36 out of 11937 genes, 0.3%	46 out of 19550 genes, 0.2%	1
inner ear receptor cell development	16 out of 11937 genes, 0.1%	18 out of 19550 genes, 0.1%	1
regulation of interphase of mitotic cell cycle	29 out of 11937 genes, 0.2%	36 out of 19550 genes, 0.2%	1
neuron development	256 out of 11937 genes, 2.1%	383 out of 19550 genes, 2.0%	1
regulation of system process	359 out of 11937 genes, 3.0%	545 out of 19550 genes, 2.8%	1
cellular component movement	528 out of 11937 genes, 4.4%	813 out of 19550 genes, 4.2%	1
purine ribonucleotide biosynthetic process	97 out of 11937 genes, 0.8%	137 out of 19550 genes, 0.7%	1
regulation of apoptotic process	470 out of 11937 genes, 3.9%	721 out of 19550 genes, 3.7%	1
regulation of cellular localization	236 out of 11937 genes, 2.0%	352 out of 19550 genes, 1.8%	1
carbohydrate derivative metabolic process	671 out of 11937 genes, 5.6%	1041 out of 19550 genes, 5.3%	1
negative regulation of transcription, DNA-dependent	175 out of 11937 genes, 1.5%	257 out of 19550 genes, 1.3%	1
T cell activation	151 out of 11937 genes, 1.3%	220 out of 19550 genes, 1.1%	1
negative regulation of nucleocytoplasmic transport	31 out of 11937 genes, 0.3%	39 out of 19550 genes, 0.2%	1
nucleocytoplasmic transport	171 out of 11937 genes, 1.4%	251 out of 19550 genes, 1.3%	1
positive regulation of cytoskeleton organization	40 out of 11937 genes, 0.3%	52 out of 19550 genes, 0.3%	1
purine deoxyribonucleoside triphosphate metabolic process	9 out of 11937 genes, 0.1%	9 out of 19550 genes, 0.0%	1
body morphogenesis	9 out of 11937 genes, 0.1%	9 out of 19550 genes, 0.0%	1
response to gamma radiation	9 out of 11937 genes, 0.1%	9 out of 19550 genes, 0.0%	1
regulation of transcription during mitosis	9 out of 11937 genes, 0.1%	9 out of 19550 genes, 0.0%	1
positive regulation of transcription during mitosis	9 out of 11937 genes, 0.1%	9 out of 19550 genes, 0.0%	1
negative regulation of protein phosphorylation	61 out of 11937 genes, 0.5%	83 out of 19550 genes, 0.4%	1
negative regulation of phosphorus metabolic process	61 out of 11937 genes, 0.5%	83 out of 19550 genes, 0.4%	1
second-messenger-mediated signaling	61 out of 11937 genes, 0.5%	83 out of 19550 genes, 0.4%	1
negative regulation of phosphorylation	61 out of 11937 genes, 0.5%	83 out of 19550 genes, 0.4%	1
negative regulation of phosphate metabolic process	61 out of 11937 genes, 0.5%	83 out of 19550 genes, 0.4%	1
macromolecule localization	888 out of 11937 genes, 7.4%	1389 out of 19550 genes, 7.1%	1
axon ensheathment	63 out of 11937 genes, 0.5%	86 out of 19550 genes, 0.4%	1
regulation of muscle organ development	63 out of 11937 genes, 0.5%	86 out of 19550 genes, 0.4%	1
DNA-dependent transcription, initiation	73 out of 11937 genes, 0.6%	101 out of 19550 genes, 0.5%	1
germ cell development	67 out of 11937 genes, 0.6%	92 out of 19550 genes, 0.5%	1
MAPK cascade	145 out of 11937 genes, 1.2%	211 out of 19550 genes, 1.1%	1
positive regulation of transcription, DNA-dependent	21 out of 11937 genes, 0.2%	25 out of 19550 genes, 0.1%	1
microspike assembly	26 out of 11937 genes, 0.2%	32 out of 19550 genes, 0.2%	1
regulation of ARF protein signal transduction	26 out of 11937 genes, 0.2%	32 out of 19550 genes, 0.2%	1
regulation of skeletal muscle fiber development	33 out of 11937 genes, 0.3%	42 out of 19550 genes, 0.2%	1
regulation of striated muscle cell differentiation	33 out of 11937 genes, 0.3%	42 out of 19550 genes, 0.2%	1
cellular response to endogenous stimulus	115 out of 11937 genes, 1.0%	165 out of 19550 genes, 0.8%	1
embryonic morphogenesis	339 out of 11937 genes, 2.8%	515 out of 19550 genes, 2.6%	1
tissue development	703 out of 11937 genes, 5.9%	1094 out of 19550 genes, 5.6%	1
monocarboxylic acid metabolic process	297 out of 11937 genes, 2.5%	449 out of 19550 genes, 2.3%	1
leukocyte proliferation	84 out of 11937 genes, 0.7%	118 out of 19550 genes, 0.6%	1
positive regulation of apoptotic process	225 out of 11937 genes, 1.9%	336 out of 19550 genes, 1.7%	1
antigen receptor-mediated signaling pathway	82 out of 11937 genes, 0.7%	115 out of 19550 genes, 0.6%	1
induction of apoptosis by intracellular signals	52 out of 11937 genes, 0.4%	70 out of 19550 genes, 0.4%	1
response to amino acid stimulus	18 out of 11937 genes, 0.2%	21 out of 19550 genes, 0.1%	1
positive regulation of cellular metabolic process	431 out of 11937 genes, 3.6%	661 out of 19550 genes, 3.4%	1
response to metal ion	253 out of 11937 genes, 2.1%	380 out of 19550 genes, 1.9%	1
multicellular organism growth	78 out of 11937 genes, 0.7%	109 out of 19550 genes, 0.6%	1
negative regulation of macromolecule biosynthetic process	207 out of 11937 genes, 1.7%	308 out of 19550 genes, 1.6%	1
regulation of cell morphogenesis	68 out of 11937 genes, 0.6%	94 out of 19550 genes, 0.5%	1
RNA export from nucleus	66 out of 11937 genes, 0.6%	91 out of 19550 genes, 0.5%	1
superoxide metabolic process	23 out of 11937 genes, 0.2%	28 out of 19550 genes, 0.1%	1
intracellular receptor mediated signaling pathway	97 out of 11937 genes, 0.8%	138 out of 19550 genes, 0.7%	1
sex differentiation	138 out of 11937 genes, 1.2%	201 out of 19550 genes, 1.0%	1
cell migration	396 out of 11937 genes, 3.3%	606 out of 19550 genes, 3.1%	1
lysine metabolic process	12 out of 11937 genes, 0.1%	13 out of 19550 genes, 0.1%	1
nucleoside transport	12 out of 11937 genes, 0.1%	13 out of 19550 genes, 0.1%	1
cellular monovalent inorganic anion homeostasis	12 out of 11937 genes, 0.1%	13 out of 19550 genes, 0.1%	1
regulation of chromatin silencing	12 out of 11937 genes, 0.1%	13 out of 19550 genes, 0.1%	1
negative regulation of chromatin silencing	12 out of 11937 genes, 0.1%	13 out of 19550 genes, 0.1%	1
corticosteroid receptor signaling pathway	12 out of 11937 genes, 0.1%	13 out of 19550 genes, 0.1%	1
positive regulation of gene expression, epigenetic	12 out of 11937 genes, 0.1%	13 out of 19550 genes, 0.1%	1
regulation of helicase activity	12 out of 11937 genes, 0.1%	13 out of 19550 genes, 0.1%	1
monovalent inorganic anion homeostasis	12 out of 11937 genes, 0.1%	13 out of 19550 genes, 0.1%	1
tricarboxylic acid metabolic process	12 out of 11937 genes, 0.1%	13 out of 19550 genes, 0.1%	1
negative regulation of transmembrane transport	30 out of 11937 genes, 0.3%	38 out of 19550 genes, 0.2%	1
immune response-activating cell surface receptor signaling pathway	91 out of 11937 genes, 0.8%	129 out of 19550 genes, 0.7%	1
positive regulation of DNA binding	41 out of 11937 genes, 0.3%	54 out of 19550 genes, 0.3%	1
ion transmembrane transport	259 out of 11937 genes, 2.2%	390 out of 19550 genes, 2.0%	1
cellular nitrogen compound biosynthetic process	227 out of 11937 genes, 1.9%	340 out of 19550 genes, 1.7%	1
neuron projection morphogenesis	117 out of 11937 genes, 1.0%	169 out of 19550 genes, 0.9%	1
regulation of developmental growth	32 out of 11937 genes, 0.3%	41 out of 19550 genes, 0.2%	1
cell motility	495 out of 11937 genes, 4.1%	764 out of 19550 genes, 3.9%	1
localization of cell	495 out of 11937 genes, 4.1%	764 out of 19550 genes, 3.9%	1
elevation of cytosolic calcium ion concentration	25 out of 11937 genes, 0.2%	31 out of 19550 genes, 0.2%	1
purine nucleoside monophosphate metabolic process	25 out of 11937 genes, 0.2%	31 out of 19550 genes, 0.2%	1
ribonucleoside monophosphate metabolic process	25 out of 11937 genes, 0.2%	31 out of 19550 genes, 0.2%	1
regulation of lymphocyte proliferation	75 out of 11937 genes, 0.6%	105 out of 19550 genes, 0.5%	1
cellular response to extracellular stimulus	49 out of 11937 genes, 0.4%	66 out of 19550 genes, 0.3%	1
cellular response to external stimulus	49 out of 11937 genes, 0.4%	66 out of 19550 genes, 0.3%	1
calcium ion-dependent exocytosis	20 out of 11937 genes, 0.2%	24 out of 19550 genes, 0.1%	1
peptidyl-glutamic acid modification	20 out of 11937 genes, 0.2%	24 out of 19550 genes, 0.1%	1
regulation of muscle cell differentiation	51 out of 11937 genes, 0.4%	69 out of 19550 genes, 0.4%	1
innate immune response	34 out of 11937 genes, 0.3%	44 out of 19550 genes, 0.2%	1
negative regulation of intracellular protein kinase cascade	67 out of 11937 genes, 0.6%	93 out of 19550 genes, 0.5%	1
regulation of mitosis	63 out of 11937 genes, 0.5%	87 out of 19550 genes, 0.4%	1
regulation of nuclear division	63 out of 11937 genes, 0.5%	87 out of 19550 genes, 0.4%	1
immune response-regulating cell surface receptor signaling pathway	92 out of 11937 genes, 0.8%	131 out of 19550 genes, 0.7%	1
immune system development	368 out of 11937 genes, 3.1%	563 out of 19550 genes, 2.9%	1
microtubule depolymerization	27 out of 11937 genes, 0.2%	34 out of 19550 genes, 0.2%	1
nuclear transport	192 out of 11937 genes, 1.6%	286 out of 19550 genes, 1.5%	1
negative regulation of cellular biosynthetic process	215 out of 11937 genes, 1.8%	322 out of 19550 genes, 1.6%	1
positive regulation of Wnt receptor signaling pathway	38 out of 11937 genes, 0.3%	50 out of 19550 genes, 0.3%	1
striated muscle cell differentiation	84 out of 11937 genes, 0.7%	119 out of 19550 genes, 0.6%	1
mitochondrial fission	8 out of 11937 genes, 0.1%	8 out of 19550 genes, 0.0%	1
heart valve development	8 out of 11937 genes, 0.1%	8 out of 19550 genes, 0.0%	1
purine nucleoside monophosphate catabolic process	8 out of 11937 genes, 0.1%	8 out of 19550 genes, 0.0%	1
ribonucleoside monophosphate catabolic process	8 out of 11937 genes, 0.1%	8 out of 19550 genes, 0.0%	1
purine ribonucleoside monophosphate catabolic process	8 out of 11937 genes, 0.1%	8 out of 19550 genes, 0.0%	1
regulation of neuron maturation	8 out of 11937 genes, 0.1%	8 out of 19550 genes, 0.0%	1
base conversion or substitution editing	8 out of 11937 genes, 0.1%	8 out of 19550 genes, 0.0%	1
regulation of vesicle fusion	8 out of 11937 genes, 0.1%	8 out of 19550 genes, 0.0%	1
endoplasmic reticulum calcium ion homeostasis	8 out of 11937 genes, 0.1%	8 out of 19550 genes, 0.0%	1
positive regulation of toll-like receptor signaling pathway	8 out of 11937 genes, 0.1%	8 out of 19550 genes, 0.0%	1
regulation of protein serine/threonine kinase activity	156 out of 11937 genes, 1.3%	230 out of 19550 genes, 1.2%	1
protein ubiquitination	181 out of 11937 genes, 1.5%	269 out of 19550 genes, 1.4%	1
growth	447 out of 11937 genes, 3.7%	689 out of 19550 genes, 3.5%	1
regulation of gene expression, epigenetic	80 out of 11937 genes, 0.7%	113 out of 19550 genes, 0.6%	1
skeletal muscle tissue development	40 out of 11937 genes, 0.3%	53 out of 19550 genes, 0.3%	1
hemopoietic or lymphoid organ development	348 out of 11937 genes, 2.9%	532 out of 19550 genes, 2.7%	1
post-Golgi vesicle-mediated transport	17 out of 11937 genes, 0.1%	20 out of 19550 genes, 0.1%	1
neuron maturation	17 out of 11937 genes, 0.1%	20 out of 19550 genes, 0.1%	1
developmental cell growth	29 out of 11937 genes, 0.2%	37 out of 19550 genes, 0.2%	1
renal system process	42 out of 11937 genes, 0.4%	56 out of 19550 genes, 0.3%	1
actin filament organization	95 out of 11937 genes, 0.8%	136 out of 19550 genes, 0.7%	1
skeletal muscle organ development	44 out of 11937 genes, 0.4%	59 out of 19550 genes, 0.3%	1
positive regulation of hydrolase activity	148 out of 11937 genes, 1.2%	218 out of 19550 genes, 1.1%	1
vacuole organization	48 out of 11937 genes, 0.4%	65 out of 19550 genes, 0.3%	1
organic substance metabolic process	692 out of 11937 genes, 5.8%	1081 out of 19550 genes, 5.5%	1
neurotransmitter secretion	31 out of 11937 genes, 0.3%	40 out of 19550 genes, 0.2%	1
skeletal muscle fiber development	31 out of 11937 genes, 0.3%	40 out of 19550 genes, 0.2%	1
protein depolymerization	31 out of 11937 genes, 0.3%	40 out of 19550 genes, 0.2%	1
positive regulation of organelle organization	58 out of 11937 genes, 0.5%	80 out of 19550 genes, 0.4%	1
nucleoside triphosphate biosynthetic process	87 out of 11937 genes, 0.7%	124 out of 19550 genes, 0.6%	1
dephosphorylation	102 out of 11937 genes, 0.9%	147 out of 19550 genes, 0.8%	1
T cell differentiation	85 out of 11937 genes, 0.7%	121 out of 19550 genes, 0.6%	1
cellular response to chemical stimulus	290 out of 11937 genes, 2.4%	441 out of 19550 genes, 2.3%	1
response to external stimulus	761 out of 11937 genes, 6.4%	1192 out of 19550 genes, 6.1%	1
anti-apoptosis	14 out of 11937 genes, 0.1%	16 out of 19550 genes, 0.1%	1
positive T cell selection	14 out of 11937 genes, 0.1%	16 out of 19550 genes, 0.1%	1
mitochondrion localization	14 out of 11937 genes, 0.1%	16 out of 19550 genes, 0.1%	1
cellular component maintenance	33 out of 11937 genes, 0.3%	43 out of 19550 genes, 0.2%	1
regulation of S phase of mitotic cell cycle	24 out of 11937 genes, 0.2%	30 out of 19550 genes, 0.2%	1
regulation of S phase	24 out of 11937 genes, 0.2%	30 out of 19550 genes, 0.2%	1
negative regulation of transcription factor import into nucleus	24 out of 11937 genes, 0.2%	30 out of 19550 genes, 0.2%	1
negative regulation of protein metabolic process	96 out of 11937 genes, 0.8%	138 out of 19550 genes, 0.7%	1
protein hydroxylation	11 out of 11937 genes, 0.1%	12 out of 19550 genes, 0.1%	1
negative regulation of ossification	11 out of 11937 genes, 0.1%	12 out of 19550 genes, 0.1%	1
negative regulation of smooth muscle contraction	11 out of 11937 genes, 0.1%	12 out of 19550 genes, 0.1%	1
branching involved in prostate gland morphogenesis	11 out of 11937 genes, 0.1%	12 out of 19550 genes, 0.1%	1
small GTPase mediated signal transduction	195 out of 11937 genes, 1.6%	292 out of 19550 genes, 1.5%	1
odontogenesis	71 out of 11937 genes, 0.6%	100 out of 19550 genes, 0.5%	1
neuron projection development	145 out of 11937 genes, 1.2%	214 out of 19550 genes, 1.1%	1
T cell proliferation	69 out of 11937 genes, 0.6%	97 out of 19550 genes, 0.5%	1
cell division	41 out of 11937 genes, 0.3%	55 out of 19550 genes, 0.3%	1
negative regulation of Wnt receptor signaling pathway	63 out of 11937 genes, 0.5%	88 out of 19550 genes, 0.5%	1
cellular response to nutrient levels	43 out of 11937 genes, 0.4%	58 out of 19550 genes, 0.3%	1
signal transduction	2660 out of 11937 genes, 22.3%	4266 out of 19550 genes, 21.8%	1
positive regulation of catalytic activity	319 out of 11937 genes, 2.7%	488 out of 19550 genes, 2.5%	1
reactive oxygen species metabolic process	47 out of 11937 genes, 0.4%	64 out of 19550 genes, 0.3%	1
nucleic acid transport	108 out of 11937 genes, 0.9%	157 out of 19550 genes, 0.8%	1
regulation of neurotransmitter levels	106 out of 11937 genes, 0.9%	154 out of 19550 genes, 0.8%	1
nucleotide biosynthetic process	169 out of 11937 genes, 1.4%	252 out of 19550 genes, 1.3%	1
intracellular steroid hormone receptor signaling pathway	76 out of 11937 genes, 0.6%	108 out of 19550 genes, 0.6%	1
negative regulation of biosynthetic process	232 out of 11937 genes, 1.9%	351 out of 19550 genes, 1.8%	1
response to oxidative stress	124 out of 11937 genes, 1.0%	182 out of 19550 genes, 0.9%	1
cell differentiation in hindbrain	16 out of 11937 genes, 0.1%	19 out of 19550 genes, 0.1%	1
regulation of intracellular pH	16 out of 11937 genes, 0.1%	19 out of 19550 genes, 0.1%	1
regulation of triglyceride metabolic process	16 out of 11937 genes, 0.1%	19 out of 19550 genes, 0.1%	1
epithelium development	275 out of 11937 genes, 2.3%	419 out of 19550 genes, 2.1%	1
negative regulation of transport	85 out of 11937 genes, 0.7%	122 out of 19550 genes, 0.6%	1
amino acid transport	98 out of 11937 genes, 0.8%	142 out of 19550 genes, 0.7%	1
nucleotide metabolic process	598 out of 11937 genes, 5.0%	934 out of 19550 genes, 4.8%	1
regulation of symbiosis, encompassing mutualism through parasitism	23 out of 11937 genes, 0.2%	29 out of 19550 genes, 0.1%	1
regulation of growth of symbiont in host	23 out of 11937 genes, 0.2%	29 out of 19550 genes, 0.1%	1
regulation of cell morphogenesis involved in differentiation	64 out of 11937 genes, 0.5%	90 out of 19550 genes, 0.5%	1
regulation of angiogenesis	62 out of 11937 genes, 0.5%	87 out of 19550 genes, 0.4%	1
fluid transport	36 out of 11937 genes, 0.3%	48 out of 19550 genes, 0.2%	1
negative regulation of programmed cell death	269 out of 11937 genes, 2.3%	410 out of 19550 genes, 2.1%	1
negative regulation of cell death	269 out of 11937 genes, 2.3%	410 out of 19550 genes, 2.1%	1
pyridine-containing compound metabolic process	38 out of 11937 genes, 0.3%	51 out of 19550 genes, 0.3%	1
mononuclear cell proliferation	79 out of 11937 genes, 0.7%	113 out of 19550 genes, 0.6%	1
activation of MAPK activity	56 out of 11937 genes, 0.5%	78 out of 19550 genes, 0.4%	1
response to superoxide	7 out of 11937 genes, 0.1%	7 out of 19550 genes, 0.0%	1
synapse assembly	7 out of 11937 genes, 0.1%	7 out of 19550 genes, 0.0%	1
glial cell proliferation	7 out of 11937 genes, 0.1%	7 out of 19550 genes, 0.0%	1
myotube differentiation	7 out of 11937 genes, 0.1%	7 out of 19550 genes, 0.0%	1
urea transport	7 out of 11937 genes, 0.1%	7 out of 19550 genes, 0.0%	1
removal of superoxide radicals	7 out of 11937 genes, 0.1%	7 out of 19550 genes, 0.0%	1
microvillus assembly	7 out of 11937 genes, 0.1%	7 out of 19550 genes, 0.0%	1
N-terminal protein amino acid modification	7 out of 11937 genes, 0.1%	7 out of 19550 genes, 0.0%	1
microvillus organization	7 out of 11937 genes, 0.1%	7 out of 19550 genes, 0.0%	1
somatic stem cell maintenance	7 out of 11937 genes, 0.1%	7 out of 19550 genes, 0.0%	1
protein deglutamylation	7 out of 11937 genes, 0.1%	7 out of 19550 genes, 0.0%	1
skeletal muscle cell differentiation	7 out of 11937 genes, 0.1%	7 out of 19550 genes, 0.0%	1
histone H3 acetylation	7 out of 11937 genes, 0.1%	7 out of 19550 genes, 0.0%	1
cellular response to oxygen radical	7 out of 11937 genes, 0.1%	7 out of 19550 genes, 0.0%	1
cellular response to superoxide	7 out of 11937 genes, 0.1%	7 out of 19550 genes, 0.0%	1
extracellular matrix assembly	7 out of 11937 genes, 0.1%	7 out of 19550 genes, 0.0%	1
cell morphogenesis	308 out of 11937 genes, 2.6%	472 out of 19550 genes, 2.4%	1
RNA transport	103 out of 11937 genes, 0.9%	150 out of 19550 genes, 0.8%	1
establishment of RNA localization	103 out of 11937 genes, 0.9%	150 out of 19550 genes, 0.8%	1
blastocyst development	50 out of 11937 genes, 0.4%	69 out of 19550 genes, 0.4%	1
specification of symmetry	50 out of 11937 genes, 0.4%	69 out of 19550 genes, 0.4%	1
regulation of action potential	90 out of 11937 genes, 0.8%	130 out of 19550 genes, 0.7%	1
in utero embryonic development	90 out of 11937 genes, 0.8%	130 out of 19550 genes, 0.7%	1
actin filament polymerization	25 out of 11937 genes, 0.2%	32 out of 19550 genes, 0.2%	1
protein polymerization	25 out of 11937 genes, 0.2%	32 out of 19550 genes, 0.2%	1
cell migration involved in sprouting angiogenesis	13 out of 11937 genes, 0.1%	15 out of 19550 genes, 0.1%	1
neuron recognition	13 out of 11937 genes, 0.1%	15 out of 19550 genes, 0.1%	1
odontogenesis of dentin-containing tooth	13 out of 11937 genes, 0.1%	15 out of 19550 genes, 0.1%	1
transcription factor import into nucleus	13 out of 11937 genes, 0.1%	15 out of 19550 genes, 0.1%	1
blood vessel endothelial cell migration	13 out of 11937 genes, 0.1%	15 out of 19550 genes, 0.1%	1
multicellular organismal movement	18 out of 11937 genes, 0.2%	22 out of 19550 genes, 0.1%	1
small molecule metabolic process	1416 out of 11937 genes, 11.9%	2253 out of 19550 genes, 11.5%	1
negative regulation of apoptotic process	268 out of 11937 genes, 2.2%	409 out of 19550 genes, 2.1%	1
regulation of lymphocyte activation	176 out of 11937 genes, 1.5%	264 out of 19550 genes, 1.4%	1
purine nucleoside triphosphate biosynthetic process	84 out of 11937 genes, 0.7%	121 out of 19550 genes, 0.6%	1
ribonucleoside triphosphate biosynthetic process	84 out of 11937 genes, 0.7%	121 out of 19550 genes, 0.6%	1
neural retina development	10 out of 11937 genes, 0.1%	11 out of 19550 genes, 0.1%	1
response to iron ion	10 out of 11937 genes, 0.1%	11 out of 19550 genes, 0.1%	1
positive regulation of protein binding	10 out of 11937 genes, 0.1%	11 out of 19550 genes, 0.1%	1
regulation of meiosis	10 out of 11937 genes, 0.1%	11 out of 19550 genes, 0.1%	1
establishment of nucleus localization	10 out of 11937 genes, 0.1%	11 out of 19550 genes, 0.1%	1
regulation of meiotic cell cycle	10 out of 11937 genes, 0.1%	11 out of 19550 genes, 0.1%	1
signal transduction in response to DNA damage	80 out of 11937 genes, 0.7%	115 out of 19550 genes, 0.6%	1
negative regulation of molecular function	381 out of 11937 genes, 3.2%	589 out of 19550 genes, 3.0%	1
protein dephosphorylation	91 out of 11937 genes, 0.8%	132 out of 19550 genes, 0.7%	1
negative regulation of cellular component organization	154 out of 11937 genes, 1.3%	230 out of 19550 genes, 1.2%	1
regulation of membrane potential	168 out of 11937 genes, 1.4%	252 out of 19550 genes, 1.3%	1
regulation of B cell activation	76 out of 11937 genes, 0.6%	109 out of 19550 genes, 0.6%	1
regulation of cyclin-dependent protein kinase activity	33 out of 11937 genes, 0.3%	44 out of 19550 genes, 0.2%	1
cardiac muscle tissue development	55 out of 11937 genes, 0.5%	77 out of 19550 genes, 0.4%	1
nucleoside phosphate metabolic process	604 out of 11937 genes, 5.1%	946 out of 19550 genes, 4.8%	1
lymphocyte proliferation	74 out of 11937 genes, 0.6%	106 out of 19550 genes, 0.5%	1
secretion by cell	275 out of 11937 genes, 2.3%	421 out of 19550 genes, 2.2%	1
regulation of cell activation	213 out of 11937 genes, 1.8%	323 out of 19550 genes, 1.7%	1
heart development	134 out of 11937 genes, 1.1%	199 out of 19550 genes, 1.0%	1
pyridine nucleotide metabolic process	37 out of 11937 genes, 0.3%	50 out of 19550 genes, 0.3%	1
nicotinamide nucleotide metabolic process	37 out of 11937 genes, 0.3%	50 out of 19550 genes, 0.3%	1
determination of bilateral symmetry	49 out of 11937 genes, 0.4%	68 out of 19550 genes, 0.3%	1
phenol-containing compound metabolic process	41 out of 11937 genes, 0.3%	56 out of 19550 genes, 0.3%	1
negative regulation of sequence-specific DNA binding transcription factor activity	43 out of 11937 genes, 0.4%	59 out of 19550 genes, 0.3%	1
negative T cell selection	15 out of 11937 genes, 0.1%	18 out of 19550 genes, 0.1%	1
muscle adaptation	15 out of 11937 genes, 0.1%	18 out of 19550 genes, 0.1%	1
nucleus localization	15 out of 11937 genes, 0.1%	18 out of 19550 genes, 0.1%	1
cellular homeostasis	540 out of 11937 genes, 4.5%	844 out of 19550 genes, 4.3%	1
regulation of leukocyte activation	207 out of 11937 genes, 1.7%	314 out of 19550 genes, 1.6%	1
morphogenesis of an epithelium	179 out of 11937 genes, 1.5%	270 out of 19550 genes, 1.4%	1
nerve development	24 out of 11937 genes, 0.2%	31 out of 19550 genes, 0.2%	1
limb morphogenesis	108 out of 11937 genes, 0.9%	159 out of 19550 genes, 0.8%	1
limb development	108 out of 11937 genes, 0.9%	159 out of 19550 genes, 0.8%	1
positive regulation of metabolic process	492 out of 11937 genes, 4.1%	768 out of 19550 genes, 3.9%	1
aspartate family amino acid metabolic process	26 out of 11937 genes, 0.2%	34 out of 19550 genes, 0.2%	1
cyclic-nucleotide-mediated signaling	26 out of 11937 genes, 0.2%	34 out of 19550 genes, 0.2%	1
B cell differentiation	26 out of 11937 genes, 0.2%	34 out of 19550 genes, 0.2%	1
regulation of binding	154 out of 11937 genes, 1.3%	231 out of 19550 genes, 1.2%	1
hormone metabolic process	56 out of 11937 genes, 0.5%	79 out of 19550 genes, 0.4%	1
macromolecular complex subunit organization	685 out of 11937 genes, 5.7%	1078 out of 19550 genes, 5.5%	1
cellular metabolic compound salvage	17 out of 11937 genes, 0.1%	21 out of 19550 genes, 0.1%	1
M phase	283 out of 11937 genes, 2.4%	435 out of 19550 genes, 2.2%	1
nucleobase-containing small molecule metabolic process	627 out of 11937 genes, 5.3%	985 out of 19550 genes, 5.0%	1
purine ribonucleoside triphosphate biosynthetic process	82 out of 11937 genes, 0.7%	119 out of 19550 genes, 0.6%	1
RNA methylation	12 out of 11937 genes, 0.1%	14 out of 19550 genes, 0.1%	1
regulation of translational elongation	12 out of 11937 genes, 0.1%	14 out of 19550 genes, 0.1%	1
stem cell division	12 out of 11937 genes, 0.1%	14 out of 19550 genes, 0.1%	1
negative regulation of microtubule polymerization or depolymerization	12 out of 11937 genes, 0.1%	14 out of 19550 genes, 0.1%	1
intracellular pH reduction	12 out of 11937 genes, 0.1%	14 out of 19550 genes, 0.1%	1
regulation of morphogenesis of a branching structure	12 out of 11937 genes, 0.1%	14 out of 19550 genes, 0.1%	1
myeloid cell differentiation	80 out of 11937 genes, 0.7%	116 out of 19550 genes, 0.6%	1
regulation of cell size	32 out of 11937 genes, 0.3%	43 out of 19550 genes, 0.2%	1
muscle organ morphogenesis	44 out of 11937 genes, 0.4%	61 out of 19550 genes, 0.3%	1
muscle tissue morphogenesis	44 out of 11937 genes, 0.4%	61 out of 19550 genes, 0.3%	1
regulation of hormone levels	169 out of 11937 genes, 1.4%	255 out of 19550 genes, 1.3%	1
cellular cation homeostasis	301 out of 11937 genes, 2.5%	464 out of 19550 genes, 2.4%	1
neurotransmitter transport	36 out of 11937 genes, 0.3%	49 out of 19550 genes, 0.3%	1
nucleus organization	36 out of 11937 genes, 0.3%	49 out of 19550 genes, 0.3%	1
extracellular matrix organization	36 out of 11937 genes, 0.3%	49 out of 19550 genes, 0.3%	1
protein complex disassembly	36 out of 11937 genes, 0.3%	49 out of 19550 genes, 0.3%	1
Ras protein signal transduction	144 out of 11937 genes, 1.2%	216 out of 19550 genes, 1.1%	1
positive regulation of binding	59 out of 11937 genes, 0.5%	84 out of 19550 genes, 0.4%	1
nitrogen compound transport	94 out of 11937 genes, 0.8%	138 out of 19550 genes, 0.7%	1
regulation of histone H3-K36 methylation	6 out of 11937 genes, 0.1%	6 out of 19550 genes, 0.0%	1
T cell lineage commitment	6 out of 11937 genes, 0.1%	6 out of 19550 genes, 0.0%	1
mitotic sister chromatid cohesion	6 out of 11937 genes, 0.1%	6 out of 19550 genes, 0.0%	1
centrosome cycle	6 out of 11937 genes, 0.1%	6 out of 19550 genes, 0.0%	1
regulation of synaptic growth at neuromuscular junction	6 out of 11937 genes, 0.1%	6 out of 19550 genes, 0.0%	1
negative regulation of neuron projection development	6 out of 11937 genes, 0.1%	6 out of 19550 genes, 0.0%	1
acetylcholine secretion	6 out of 11937 genes, 0.1%	6 out of 19550 genes, 0.0%	1
acetylcholine transport	6 out of 11937 genes, 0.1%	6 out of 19550 genes, 0.0%	1
histone deubiquitination	6 out of 11937 genes, 0.1%	6 out of 19550 genes, 0.0%	1
cerebral cortex radially oriented cell migration	6 out of 11937 genes, 0.1%	6 out of 19550 genes, 0.0%	1
regulation of granulocyte differentiation	6 out of 11937 genes, 0.1%	6 out of 19550 genes, 0.0%	1
membrane raft organization	6 out of 11937 genes, 0.1%	6 out of 19550 genes, 0.0%	1
regulation of deoxyribonuclease activity	6 out of 11937 genes, 0.1%	6 out of 19550 genes, 0.0%	1
response to interferon-alpha	6 out of 11937 genes, 0.1%	6 out of 19550 genes, 0.0%	1
steroid hormone mediated signaling pathway	6 out of 11937 genes, 0.1%	6 out of 19550 genes, 0.0%	1
epinephrine transport	6 out of 11937 genes, 0.1%	6 out of 19550 genes, 0.0%	1
regulation of synapse assembly	6 out of 11937 genes, 0.1%	6 out of 19550 genes, 0.0%	1
positive regulation of T cell apoptotic process	6 out of 11937 genes, 0.1%	6 out of 19550 genes, 0.0%	1
cellular response to steroid hormone stimulus	6 out of 11937 genes, 0.1%	6 out of 19550 genes, 0.0%	1
positive regulation of MAP kinase activity	72 out of 11937 genes, 0.6%	104 out of 19550 genes, 0.5%	1
positive regulation of protein serine/threonine kinase activity	72 out of 11937 genes, 0.6%	104 out of 19550 genes, 0.5%	1
RNA modification	57 out of 11937 genes, 0.5%	81 out of 19550 genes, 0.4%	1
positive regulation of signaling	266 out of 11937 genes, 2.2%	409 out of 19550 genes, 2.1%	1
protein glycosylation	110 out of 11937 genes, 0.9%	163 out of 19550 genes, 0.8%	1
macromolecule glycosylation	110 out of 11937 genes, 0.9%	163 out of 19550 genes, 0.8%	1
glycosylation	110 out of 11937 genes, 0.9%	163 out of 19550 genes, 0.8%	1
nucleobase-containing compound biosynthetic process	175 out of 11937 genes, 1.5%	265 out of 19550 genes, 1.4%	1
protein targeting to vacuole	9 out of 11937 genes, 0.1%	10 out of 19550 genes, 0.1%	1
regulation of triglyceride biosynthetic process	9 out of 11937 genes, 0.1%	10 out of 19550 genes, 0.1%	1
protein-cofactor linkage	9 out of 11937 genes, 0.1%	10 out of 19550 genes, 0.1%	1
regulation of muscle filament sliding	9 out of 11937 genes, 0.1%	10 out of 19550 genes, 0.1%	1
tube lumen cavitation	9 out of 11937 genes, 0.1%	10 out of 19550 genes, 0.1%	1
protein localization to vacuole	9 out of 11937 genes, 0.1%	10 out of 19550 genes, 0.1%	1
establishment of protein localization to vacuole	9 out of 11937 genes, 0.1%	10 out of 19550 genes, 0.1%	1
nucleoside monophosphate metabolic process	81 out of 11937 genes, 0.7%	118 out of 19550 genes, 0.6%	1
ribonucleotide metabolic process	442 out of 11937 genes, 3.7%	690 out of 19550 genes, 3.5%	1
ear development	108 out of 11937 genes, 0.9%	160 out of 19550 genes, 0.8%	1
reproductive structure development	108 out of 11937 genes, 0.9%	160 out of 19550 genes, 0.8%	1
positive regulation of cell development	51 out of 11937 genes, 0.4%	72 out of 19550 genes, 0.4%	1
vesicle localization	51 out of 11937 genes, 0.4%	72 out of 19550 genes, 0.4%	1
cellular membrane fusion	23 out of 11937 genes, 0.2%	30 out of 19550 genes, 0.2%	1
membrane fusion	23 out of 11937 genes, 0.2%	30 out of 19550 genes, 0.2%	1
embryonic limb morphogenesis	66 out of 11937 genes, 0.6%	95 out of 19550 genes, 0.5%	1
embryonic appendage morphogenesis	66 out of 11937 genes, 0.6%	95 out of 19550 genes, 0.5%	1
purine ribonucleoside monophosphate biosynthetic process	14 out of 11937 genes, 0.1%	17 out of 19550 genes, 0.1%	1
establishment of mitotic spindle localization	14 out of 11937 genes, 0.1%	17 out of 19550 genes, 0.1%	1
regulation of T cell receptor signaling pathway	14 out of 11937 genes, 0.1%	17 out of 19550 genes, 0.1%	1
establishment of spindle localization	14 out of 11937 genes, 0.1%	17 out of 19550 genes, 0.1%	1
centrosome organization	14 out of 11937 genes, 0.1%	17 out of 19550 genes, 0.1%	1
spindle localization	14 out of 11937 genes, 0.1%	17 out of 19550 genes, 0.1%	1
tube morphogenesis	164 out of 11937 genes, 1.4%	248 out of 19550 genes, 1.3%	1
metal ion homeostasis	282 out of 11937 genes, 2.4%	435 out of 19550 genes, 2.2%	1
cognition	104 out of 11937 genes, 0.9%	154 out of 19550 genes, 0.8%	1
bone mineralization	25 out of 11937 genes, 0.2%	33 out of 19550 genes, 0.2%	1
regulation of T cell differentiation	45 out of 11937 genes, 0.4%	63 out of 19550 genes, 0.3%	1
DNA damage response, signal transduction by p53 class mediator	62 out of 11937 genes, 0.5%	89 out of 19550 genes, 0.5%	1
cofactor biosynthetic process	62 out of 11937 genes, 0.5%	89 out of 19550 genes, 0.5%	1
signal transduction by p53 class mediator	62 out of 11937 genes, 0.5%	89 out of 19550 genes, 0.5%	1
learning or memory	102 out of 11937 genes, 0.9%	151 out of 19550 genes, 0.8%	1
cellular protein complex assembly	118 out of 11937 genes, 1.0%	176 out of 19550 genes, 0.9%	1
development of primary sexual characteristics	118 out of 11937 genes, 1.0%	176 out of 19550 genes, 0.9%	1
rRNA metabolic process	29 out of 11937 genes, 0.2%	39 out of 19550 genes, 0.2%	1
protein deubiquitination	29 out of 11937 genes, 0.2%	39 out of 19550 genes, 0.2%	1
regulation of lyase activity	29 out of 11937 genes, 0.2%	39 out of 19550 genes, 0.2%	1
negative regulation of multicellular organismal process	132 out of 11937 genes, 1.1%	198 out of 19550 genes, 1.0%	1
catecholamine metabolic process	31 out of 11937 genes, 0.3%	42 out of 19550 genes, 0.2%	1
catechol-containing compound metabolic process	31 out of 11937 genes, 0.3%	42 out of 19550 genes, 0.2%	1
positive regulation of gene expression	31 out of 11937 genes, 0.3%	42 out of 19550 genes, 0.2%	1
diol metabolic process	31 out of 11937 genes, 0.3%	42 out of 19550 genes, 0.2%	1
regulation of cell-matrix adhesion	35 out of 11937 genes, 0.3%	48 out of 19550 genes, 0.2%	1
regulation of G-protein coupled receptor protein signaling pathway	35 out of 11937 genes, 0.3%	48 out of 19550 genes, 0.2%	1
multicellular organismal metabolic process	33 out of 11937 genes, 0.3%	45 out of 19550 genes, 0.2%	1
induction of apoptosis	184 out of 11937 genes, 1.5%	280 out of 19550 genes, 1.4%	1
regulation of multi-organism process	71 out of 11937 genes, 0.6%	103 out of 19550 genes, 0.5%	1
regulation of lymphocyte differentiation	58 out of 11937 genes, 0.5%	83 out of 19550 genes, 0.4%	1
forebrain development	189 out of 11937 genes, 1.6%	288 out of 19550 genes, 1.5%	1
striated muscle cell development	56 out of 11937 genes, 0.5%	80 out of 19550 genes, 0.4%	1
sprouting angiogenesis	16 out of 11937 genes, 0.1%	20 out of 19550 genes, 0.1%	1
muscle hypertrophy	16 out of 11937 genes, 0.1%	20 out of 19550 genes, 0.1%	1
cell proliferation in forebrain	16 out of 11937 genes, 0.1%	20 out of 19550 genes, 0.1%	1
central nervous system neuron development	16 out of 11937 genes, 0.1%	20 out of 19550 genes, 0.1%	1
central nervous system neuron axonogenesis	16 out of 11937 genes, 0.1%	20 out of 19550 genes, 0.1%	1
cellular anion homeostasis	16 out of 11937 genes, 0.1%	20 out of 19550 genes, 0.1%	1
protein localization to chromosome	16 out of 11937 genes, 0.1%	20 out of 19550 genes, 0.1%	1
cell-cell signaling involved in cell fate commitment	16 out of 11937 genes, 0.1%	20 out of 19550 genes, 0.1%	1
nucleotide catabolic process	408 out of 11937 genes, 3.4%	637 out of 19550 genes, 3.3%	1
purine ribonucleotide metabolic process	436 out of 11937 genes, 3.7%	682 out of 19550 genes, 3.5%	1
cellular calcium ion homeostasis	147 out of 11937 genes, 1.2%	222 out of 19550 genes, 1.1%	1
calcium ion homeostasis	147 out of 11937 genes, 1.2%	222 out of 19550 genes, 1.1%	1
central nervous system neuron differentiation	52 out of 11937 genes, 0.4%	74 out of 19550 genes, 0.4%	1
positive regulation of cytokine biosynthetic process	52 out of 11937 genes, 0.4%	74 out of 19550 genes, 0.4%	1
protein folding	65 out of 11937 genes, 0.5%	94 out of 19550 genes, 0.5%	1
organic acid transport	159 out of 11937 genes, 1.3%	241 out of 19550 genes, 1.2%	1
carboxylic acid transport	159 out of 11937 genes, 1.3%	241 out of 19550 genes, 1.2%	1
lymphocyte homeostasis	50 out of 11937 genes, 0.4%	71 out of 19550 genes, 0.4%	1
cellular response to stimulus	2959 out of 11937 genes, 24.8%	4773 out of 19550 genes, 24.4%	1
purine nucleoside monophosphate biosynthetic process	18 out of 11937 genes, 0.2%	23 out of 19550 genes, 0.1%	1
hemopoiesis	268 out of 11937 genes, 2.2%	414 out of 19550 genes, 2.1%	1
muscle fiber development	48 out of 11937 genes, 0.4%	68 out of 19550 genes, 0.3%	1
regulation of T cell activation	83 out of 11937 genes, 0.7%	122 out of 19550 genes, 0.6%	1
positive regulation of signal transduction	256 out of 11937 genes, 2.1%	395 out of 19550 genes, 2.0%	1
natural killer cell mediated immunity	11 out of 11937 genes, 0.1%	13 out of 19550 genes, 0.1%	1
positive regulation of adaptive immune response	11 out of 11937 genes, 0.1%	13 out of 19550 genes, 0.1%	1
positive regulation of adaptive immune response based on somatic recombination of immune receptors built from immunoglobulin superfamily domains	11 out of 11937 genes, 0.1%	13 out of 19550 genes, 0.1%	1
cytokinin metabolic process	11 out of 11937 genes, 0.1%	13 out of 19550 genes, 0.1%	1
response to activity	11 out of 11937 genes, 0.1%	13 out of 19550 genes, 0.1%	1
acidic amino acid transport	11 out of 11937 genes, 0.1%	13 out of 19550 genes, 0.1%	1
Rac protein signal transduction	11 out of 11937 genes, 0.1%	13 out of 19550 genes, 0.1%	1
peptidyl-lysine methylation	11 out of 11937 genes, 0.1%	13 out of 19550 genes, 0.1%	1
negative regulation of monooxygenase activity	11 out of 11937 genes, 0.1%	13 out of 19550 genes, 0.1%	1
regulation of stress-activated MAPK cascade	11 out of 11937 genes, 0.1%	13 out of 19550 genes, 0.1%	1
phosphatidylglycerol metabolic process	11 out of 11937 genes, 0.1%	13 out of 19550 genes, 0.1%	1
positive regulation of viral reproduction	11 out of 11937 genes, 0.1%	13 out of 19550 genes, 0.1%	1
negative regulation of oxidoreductase activity	11 out of 11937 genes, 0.1%	13 out of 19550 genes, 0.1%	1
regulation of stress-activated protein kinase signaling cascade	11 out of 11937 genes, 0.1%	13 out of 19550 genes, 0.1%	1
heterocycle biosynthetic process	181 out of 11937 genes, 1.5%	276 out of 19550 genes, 1.4%	1
locomotory behavior	90 out of 11937 genes, 0.8%	133 out of 19550 genes, 0.7%	1
negative regulation of homeostatic process	20 out of 11937 genes, 0.2%	26 out of 19550 genes, 0.1%	1
regulation of cytoskeleton organization	120 out of 11937 genes, 1.0%	180 out of 19550 genes, 0.9%	1
response to estrogen stimulus	127 out of 11937 genes, 1.1%	191 out of 19550 genes, 1.0%	1
cell projection organization	326 out of 11937 genes, 2.7%	507 out of 19550 genes, 2.6%	1
M phase of mitotic cell cycle	213 out of 11937 genes, 1.8%	327 out of 19550 genes, 1.7%	1
protein modification by small protein conjugation or removal	346 out of 11937 genes, 2.9%	539 out of 19550 genes, 2.8%	1
cardiac muscle tissue morphogenesis	40 out of 11937 genes, 0.3%	56 out of 19550 genes, 0.3%	1
DNA metabolic process	520 out of 11937 genes, 4.4%	818 out of 19550 genes, 4.2%	1
porphyrin-containing compound biosynthetic process	22 out of 11937 genes, 0.2%	29 out of 19550 genes, 0.1%	1
posttranscriptional gene silencing	22 out of 11937 genes, 0.2%	29 out of 19550 genes, 0.1%	1
gene silencing by RNA	22 out of 11937 genes, 0.2%	29 out of 19550 genes, 0.1%	1
tetrapyrrole biosynthetic process	22 out of 11937 genes, 0.2%	29 out of 19550 genes, 0.1%	1
posttranscriptional gene silencing by RNA	22 out of 11937 genes, 0.2%	29 out of 19550 genes, 0.1%	1
fatty acid metabolic process	206 out of 11937 genes, 1.7%	316 out of 19550 genes, 1.6%	1
axon guidance	38 out of 11937 genes, 0.3%	53 out of 19550 genes, 0.3%	1
ribonucleotide catabolic process	379 out of 11937 genes, 3.2%	592 out of 19550 genes, 3.0%	1
response to dsRNA	36 out of 11937 genes, 0.3%	50 out of 19550 genes, 0.3%	1
regulation of exocytosis	26 out of 11937 genes, 0.2%	35 out of 19550 genes, 0.2%	1
collagen metabolic process	26 out of 11937 genes, 0.2%	35 out of 19550 genes, 0.2%	1
positive regulation of cyclase activity	32 out of 11937 genes, 0.3%	44 out of 19550 genes, 0.2%	1
multicellular organismal macromolecule metabolic process	32 out of 11937 genes, 0.3%	44 out of 19550 genes, 0.2%	1
positive regulation of cyclic nucleotide biosynthetic process	28 out of 11937 genes, 0.2%	38 out of 19550 genes, 0.2%	1
positive regulation of nucleotide biosynthetic process	28 out of 11937 genes, 0.2%	38 out of 19550 genes, 0.2%	1
regulation of cAMP metabolic process	28 out of 11937 genes, 0.2%	38 out of 19550 genes, 0.2%	1
positive regulation of cAMP metabolic process	28 out of 11937 genes, 0.2%	38 out of 19550 genes, 0.2%	1
regulation of cAMP biosynthetic process	28 out of 11937 genes, 0.2%	38 out of 19550 genes, 0.2%	1
positive regulation of cAMP biosynthetic process	28 out of 11937 genes, 0.2%	38 out of 19550 genes, 0.2%	1
regulation of adenylate cyclase activity	28 out of 11937 genes, 0.2%	38 out of 19550 genes, 0.2%	1
positive regulation of adenylate cyclase activity	28 out of 11937 genes, 0.2%	38 out of 19550 genes, 0.2%	1
positive regulation of lyase activity	28 out of 11937 genes, 0.2%	38 out of 19550 genes, 0.2%	1
positive regulation of purine nucleotide biosynthetic process	28 out of 11937 genes, 0.2%	38 out of 19550 genes, 0.2%	1
positive regulation of purine nucleotide metabolic process	28 out of 11937 genes, 0.2%	38 out of 19550 genes, 0.2%	1
positive regulation of cyclic nucleotide metabolic process	30 out of 11937 genes, 0.3%	41 out of 19550 genes, 0.2%	1
positive regulation of nucleotide metabolic process	30 out of 11937 genes, 0.3%	41 out of 19550 genes, 0.2%	1
nucleobase-containing compound catabolic process	415 out of 11937 genes, 3.5%	650 out of 19550 genes, 3.3%	1
carbohydrate derivative catabolic process	395 out of 11937 genes, 3.3%	618 out of 19550 genes, 3.2%	1
muscle cell development	64 out of 11937 genes, 0.5%	93 out of 19550 genes, 0.5%	1
purine ribonucleotide catabolic process	378 out of 11937 genes, 3.2%	591 out of 19550 genes, 3.0%	1
phosphagen metabolic process	13 out of 11937 genes, 0.1%	16 out of 19550 genes, 0.1%	1
branched chain family amino acid metabolic process	13 out of 11937 genes, 0.1%	16 out of 19550 genes, 0.1%	1
dopamine secretion	13 out of 11937 genes, 0.1%	16 out of 19550 genes, 0.1%	1
pH reduction	13 out of 11937 genes, 0.1%	16 out of 19550 genes, 0.1%	1
lung epithelium development	13 out of 11937 genes, 0.1%	16 out of 19550 genes, 0.1%	1
positive regulation of cell communication	266 out of 11937 genes, 2.2%	412 out of 19550 genes, 2.1%	1
positive regulation of T cell activation	49 out of 11937 genes, 0.4%	70 out of 19550 genes, 0.4%	1
cytokine production	80 out of 11937 genes, 0.7%	118 out of 19550 genes, 0.6%	1
regulation of mononuclear cell proliferation	80 out of 11937 genes, 0.7%	118 out of 19550 genes, 0.6%	1
nucleoside triphosphate metabolic process	429 out of 11937 genes, 3.6%	673 out of 19550 genes, 3.4%	1
RNA localization	103 out of 11937 genes, 0.9%	154 out of 19550 genes, 0.8%	1
microglial cell activation	8 out of 11937 genes, 0.1%	9 out of 19550 genes, 0.0%	1
somatic diversification of immune receptors via somatic mutation	8 out of 11937 genes, 0.1%	9 out of 19550 genes, 0.0%	1
ribonucleoside diphosphate metabolic process	8 out of 11937 genes, 0.1%	9 out of 19550 genes, 0.0%	1
cerebellar granule cell precursor proliferation	8 out of 11937 genes, 0.1%	9 out of 19550 genes, 0.0%	1
chromosome condensation	8 out of 11937 genes, 0.1%	9 out of 19550 genes, 0.0%	1
regulation of protein oligomerization	8 out of 11937 genes, 0.1%	9 out of 19550 genes, 0.0%	1
cell cycle cytokinesis	8 out of 11937 genes, 0.1%	9 out of 19550 genes, 0.0%	1
negative regulation of T cell differentiation	8 out of 11937 genes, 0.1%	9 out of 19550 genes, 0.0%	1
negative regulation of lymphocyte differentiation	8 out of 11937 genes, 0.1%	9 out of 19550 genes, 0.0%	1
pigment biosynthetic process	8 out of 11937 genes, 0.1%	9 out of 19550 genes, 0.0%	1
modulation by symbiont of host defense response	8 out of 11937 genes, 0.1%	9 out of 19550 genes, 0.0%	1
modulation by organism of defense response of other organism involved in symbiotic interaction	8 out of 11937 genes, 0.1%	9 out of 19550 genes, 0.0%	1
positive regulation by symbiont of host defense response	8 out of 11937 genes, 0.1%	9 out of 19550 genes, 0.0%	1
positive regulation by organism of defense response of other organism involved in symbiotic interaction	8 out of 11937 genes, 0.1%	9 out of 19550 genes, 0.0%	1
response to immune response of other organism involved in symbiotic interaction	8 out of 11937 genes, 0.1%	9 out of 19550 genes, 0.0%	1
cellular response to stress	422 out of 11937 genes, 3.5%	662 out of 19550 genes, 3.4%	1
Rho protein signal transduction	78 out of 11937 genes, 0.7%	115 out of 19550 genes, 0.6%	1
inorganic anion transport	101 out of 11937 genes, 0.8%	151 out of 19550 genes, 0.8%	1
cell growth	223 out of 11937 genes, 1.9%	344 out of 19550 genes, 1.8%	1
transmembrane receptor protein serine/threonine kinase signaling pathway	153 out of 11937 genes, 1.3%	233 out of 19550 genes, 1.2%	1
morphogenesis of a polarized epithelium	15 out of 11937 genes, 0.1%	19 out of 19550 genes, 0.1%	1
asymmetric protein localization	15 out of 11937 genes, 0.1%	19 out of 19550 genes, 0.1%	1
developmental induction	15 out of 11937 genes, 0.1%	19 out of 19550 genes, 0.1%	1
ARF protein signal transduction	15 out of 11937 genes, 0.1%	19 out of 19550 genes, 0.1%	1
positive regulation of type I interferon production	15 out of 11937 genes, 0.1%	19 out of 19550 genes, 0.1%	1
cellular polysaccharide metabolic process	41 out of 11937 genes, 0.3%	58 out of 19550 genes, 0.3%	1
sensory perception of mechanical stimulus	113 out of 11937 genes, 0.9%	170 out of 19550 genes, 0.9%	1
ribosomal subunit export from nucleus	5 out of 11937 genes, 0.0%	5 out of 19550 genes, 0.0%	1
activation of membrane attack complex	5 out of 11937 genes, 0.0%	5 out of 19550 genes, 0.0%	1
mature B cell differentiation	5 out of 11937 genes, 0.0%	5 out of 19550 genes, 0.0%	1
dendritic cell antigen processing and presentation	5 out of 11937 genes, 0.0%	5 out of 19550 genes, 0.0%	1
positive regulation of B cell mediated immunity	5 out of 11937 genes, 0.0%	5 out of 19550 genes, 0.0%	1
atrial septum development	5 out of 11937 genes, 0.0%	5 out of 19550 genes, 0.0%	1
muscle hypertrophy in response to stress	5 out of 11937 genes, 0.0%	5 out of 19550 genes, 0.0%	1
N-acetylneuraminate metabolic process	5 out of 11937 genes, 0.0%	5 out of 19550 genes, 0.0%	1
IMP biosynthetic process	5 out of 11937 genes, 0.0%	5 out of 19550 genes, 0.0%	1
mesenchymal cell proliferation	5 out of 11937 genes, 0.0%	5 out of 19550 genes, 0.0%	1
C-terminal protein amino acid modification	5 out of 11937 genes, 0.0%	5 out of 19550 genes, 0.0%	1
sphingolipid catabolic process	5 out of 11937 genes, 0.0%	5 out of 19550 genes, 0.0%	1
melatonin metabolic process	5 out of 11937 genes, 0.0%	5 out of 19550 genes, 0.0%	1
positive regulation of vesicle fusion	5 out of 11937 genes, 0.0%	5 out of 19550 genes, 0.0%	1
ribosome localization	5 out of 11937 genes, 0.0%	5 out of 19550 genes, 0.0%	1
establishment of ribosome localization	5 out of 11937 genes, 0.0%	5 out of 19550 genes, 0.0%	1
DNA dealkylation	5 out of 11937 genes, 0.0%	5 out of 19550 genes, 0.0%	1
cytokine biosynthetic process	5 out of 11937 genes, 0.0%	5 out of 19550 genes, 0.0%	1
negative regulation of circadian rhythm	5 out of 11937 genes, 0.0%	5 out of 19550 genes, 0.0%	1
tripeptide transport	5 out of 11937 genes, 0.0%	5 out of 19550 genes, 0.0%	1
activation of Janus kinase activity	5 out of 11937 genes, 0.0%	5 out of 19550 genes, 0.0%	1
regulation of skeletal muscle tissue regeneration	5 out of 11937 genes, 0.0%	5 out of 19550 genes, 0.0%	1
post-translational protein modification	5 out of 11937 genes, 0.0%	5 out of 19550 genes, 0.0%	1
positive regulation of meiosis	5 out of 11937 genes, 0.0%	5 out of 19550 genes, 0.0%	1
IMP metabolic process	5 out of 11937 genes, 0.0%	5 out of 19550 genes, 0.0%	1
positive regulation of JAK-STAT cascade	5 out of 11937 genes, 0.0%	5 out of 19550 genes, 0.0%	1
membrane lipid catabolic process	5 out of 11937 genes, 0.0%	5 out of 19550 genes, 0.0%	1
response to arsenic-containing substance	5 out of 11937 genes, 0.0%	5 out of 19550 genes, 0.0%	1
collateral sprouting	5 out of 11937 genes, 0.0%	5 out of 19550 genes, 0.0%	1
branching morphogenesis of a nerve	5 out of 11937 genes, 0.0%	5 out of 19550 genes, 0.0%	1
chromosome localization	5 out of 11937 genes, 0.0%	5 out of 19550 genes, 0.0%	1
establishment of chromosome localization	5 out of 11937 genes, 0.0%	5 out of 19550 genes, 0.0%	1
maintenance of organelle location	5 out of 11937 genes, 0.0%	5 out of 19550 genes, 0.0%	1
negative regulation of T cell apoptotic process	5 out of 11937 genes, 0.0%	5 out of 19550 genes, 0.0%	1
ribonucleoprotein complex localization	5 out of 11937 genes, 0.0%	5 out of 19550 genes, 0.0%	1
ribonucleoprotein complex export from nucleus	5 out of 11937 genes, 0.0%	5 out of 19550 genes, 0.0%	1
rRNA-containing ribonucleoprotein complex export from nucleus	5 out of 11937 genes, 0.0%	5 out of 19550 genes, 0.0%	1
positive regulation of cell cycle process	5 out of 11937 genes, 0.0%	5 out of 19550 genes, 0.0%	1
hindbrain development	63 out of 11937 genes, 0.5%	92 out of 19550 genes, 0.5%	1
microtubule-based movement	37 out of 11937 genes, 0.3%	52 out of 19550 genes, 0.3%	1
actomyosin structure organization	37 out of 11937 genes, 0.3%	52 out of 19550 genes, 0.3%	1
hair cycle	37 out of 11937 genes, 0.3%	52 out of 19550 genes, 0.3%	1
pyrimidine nucleoside triphosphate metabolic process	17 out of 11937 genes, 0.1%	22 out of 19550 genes, 0.1%	1
ribonucleoside monophosphate biosynthetic process	17 out of 11937 genes, 0.1%	22 out of 19550 genes, 0.1%	1
histone deacetylation	17 out of 11937 genes, 0.1%	22 out of 19550 genes, 0.1%	1
negative regulation of endocytosis	17 out of 11937 genes, 0.1%	22 out of 19550 genes, 0.1%	1
catecholamine secretion	17 out of 11937 genes, 0.1%	22 out of 19550 genes, 0.1%	1
anion homeostasis	17 out of 11937 genes, 0.1%	22 out of 19550 genes, 0.1%	1
negative regulation of MAPK cascade	35 out of 11937 genes, 0.3%	49 out of 19550 genes, 0.3%	1
axonogenesis	95 out of 11937 genes, 0.8%	142 out of 19550 genes, 0.7%	1
cellular protein complex disassembly	33 out of 11937 genes, 0.3%	46 out of 19550 genes, 0.2%	1
response to oxygen levels	33 out of 11937 genes, 0.3%	46 out of 19550 genes, 0.2%	1
purine nucleotide catabolic process	397 out of 11937 genes, 3.3%	623 out of 19550 genes, 3.2%	1
regulation of Notch signaling pathway	19 out of 11937 genes, 0.2%	25 out of 19550 genes, 0.1%	1
response to purine-containing compound	19 out of 11937 genes, 0.2%	25 out of 19550 genes, 0.1%	1
long-chain fatty acid transport	19 out of 11937 genes, 0.2%	25 out of 19550 genes, 0.1%	1
gonad development	86 out of 11937 genes, 0.7%	128 out of 19550 genes, 0.7%	1
positive regulation of gliogenesis	29 out of 11937 genes, 0.2%	40 out of 19550 genes, 0.2%	1
regulation of cyclic nucleotide biosynthetic process	29 out of 11937 genes, 0.2%	40 out of 19550 genes, 0.2%	1
regulation of nucleotide biosynthetic process	29 out of 11937 genes, 0.2%	40 out of 19550 genes, 0.2%	1
regulation of purine nucleotide biosynthetic process	29 out of 11937 genes, 0.2%	40 out of 19550 genes, 0.2%	1
mitochondrial membrane organization	21 out of 11937 genes, 0.2%	28 out of 19550 genes, 0.1%	1
cranial nerve development	21 out of 11937 genes, 0.2%	28 out of 19550 genes, 0.1%	1
digestive tract development	23 out of 11937 genes, 0.2%	31 out of 19550 genes, 0.2%	1
digestive system development	23 out of 11937 genes, 0.2%	31 out of 19550 genes, 0.2%	1
cellular response to reactive oxygen species	25 out of 11937 genes, 0.2%	34 out of 19550 genes, 0.2%	1
protein methylation	66 out of 11937 genes, 0.6%	97 out of 19550 genes, 0.5%	1
neural precursor cell proliferation	44 out of 11937 genes, 0.4%	63 out of 19550 genes, 0.3%	1
glycolysis	10 out of 11937 genes, 0.1%	12 out of 19550 genes, 0.1%	1
vesicle docking involved in exocytosis	10 out of 11937 genes, 0.1%	12 out of 19550 genes, 0.1%	1
pyrimidine-containing compound salvage	10 out of 11937 genes, 0.1%	12 out of 19550 genes, 0.1%	1
L-glutamate transport	10 out of 11937 genes, 0.1%	12 out of 19550 genes, 0.1%	1
dsRNA fragmentation	10 out of 11937 genes, 0.1%	12 out of 19550 genes, 0.1%	1
positive regulation of microtubule polymerization or depolymerization	10 out of 11937 genes, 0.1%	12 out of 19550 genes, 0.1%	1
negative regulation of viral transcription	10 out of 11937 genes, 0.1%	12 out of 19550 genes, 0.1%	1
response to prostaglandin stimulus	10 out of 11937 genes, 0.1%	12 out of 19550 genes, 0.1%	1
production of miRNAs involved in gene silencing by miRNA	10 out of 11937 genes, 0.1%	12 out of 19550 genes, 0.1%	1
regulation of muscle adaptation	10 out of 11937 genes, 0.1%	12 out of 19550 genes, 0.1%	1
vesicle docking	10 out of 11937 genes, 0.1%	12 out of 19550 genes, 0.1%	1
axon extension	10 out of 11937 genes, 0.1%	12 out of 19550 genes, 0.1%	1
chemical homeostasis within a tissue	10 out of 11937 genes, 0.1%	12 out of 19550 genes, 0.1%	1
regulation of dendrite development	10 out of 11937 genes, 0.1%	12 out of 19550 genes, 0.1%	1
retina development in camera-type eye	10 out of 11937 genes, 0.1%	12 out of 19550 genes, 0.1%	1
production of small RNA involved in gene silencing by RNA	10 out of 11937 genes, 0.1%	12 out of 19550 genes, 0.1%	1
cellular response to dsRNA	10 out of 11937 genes, 0.1%	12 out of 19550 genes, 0.1%	1
negative regulation of reproductive process	10 out of 11937 genes, 0.1%	12 out of 19550 genes, 0.1%	1
mesenchyme development	55 out of 11937 genes, 0.5%	80 out of 19550 genes, 0.4%	1
DNA replication	96 out of 11937 genes, 0.8%	144 out of 19550 genes, 0.7%	1
response to radiation	209 out of 11937 genes, 1.8%	323 out of 19550 genes, 1.7%	1
leukocyte homeostasis	53 out of 11937 genes, 0.4%	77 out of 19550 genes, 0.4%	1
response to organic nitrogen	53 out of 11937 genes, 0.4%	77 out of 19550 genes, 0.4%	1
respiratory tube development	101 out of 11937 genes, 0.8%	152 out of 19550 genes, 0.8%	1
organelle fission	101 out of 11937 genes, 0.8%	152 out of 19550 genes, 0.8%	1
cell adhesion	377 out of 11937 genes, 3.2%	592 out of 19550 genes, 3.0%	1
biological adhesion	377 out of 11937 genes, 3.2%	592 out of 19550 genes, 3.0%	1
cardiovascular system development	249 out of 11937 genes, 2.1%	387 out of 19550 genes, 2.0%	1
circulatory system development	249 out of 11937 genes, 2.1%	387 out of 19550 genes, 2.0%	1
cellular hormone metabolic process	40 out of 11937 genes, 0.3%	57 out of 19550 genes, 0.3%	1
oxoacid metabolic process	582 out of 11937 genes, 4.9%	922 out of 19550 genes, 4.7%	1
purine-containing compound catabolic process	398 out of 11937 genes, 3.3%	626 out of 19550 genes, 3.2%	1
regulation of cell adhesion	111 out of 11937 genes, 0.9%	168 out of 19550 genes, 0.9%	1
protein modification by small protein conjugation	305 out of 11937 genes, 2.6%	477 out of 19550 genes, 2.4%	1
molting cycle process	36 out of 11937 genes, 0.3%	51 out of 19550 genes, 0.3%	1
regulation of lipid biosynthetic process	36 out of 11937 genes, 0.3%	51 out of 19550 genes, 0.3%	1
cellular response to hormone stimulus	83 out of 11937 genes, 0.7%	124 out of 19550 genes, 0.6%	1
regulation of MAP kinase activity	123 out of 11937 genes, 1.0%	187 out of 19550 genes, 1.0%	1
amino acid transmembrane transport	12 out of 11937 genes, 0.1%	15 out of 19550 genes, 0.1%	1
cerebellar cortex development	12 out of 11937 genes, 0.1%	15 out of 19550 genes, 0.1%	1
negative regulation of epithelial cell differentiation	12 out of 11937 genes, 0.1%	15 out of 19550 genes, 0.1%	1
regulation of viral transcription	12 out of 11937 genes, 0.1%	15 out of 19550 genes, 0.1%	1
divalent inorganic cation homeostasis	152 out of 11937 genes, 1.3%	233 out of 19550 genes, 1.2%	1
positive regulation of neurogenesis	34 out of 11937 genes, 0.3%	48 out of 19550 genes, 0.2%	1
purine nucleotide metabolic process	507 out of 11937 genes, 4.2%	802 out of 19550 genes, 4.1%	1
purine nucleoside triphosphate metabolic process	420 out of 11937 genes, 3.5%	662 out of 19550 genes, 3.4%	1
regulation of cyclic nucleotide metabolic process	32 out of 11937 genes, 0.3%	45 out of 19550 genes, 0.2%	1
negative regulation of catalytic activity	286 out of 11937 genes, 2.4%	447 out of 19550 genes, 2.3%	1
cellular metal ion homeostasis	271 out of 11937 genes, 2.3%	423 out of 19550 genes, 2.2%	1
DNA-dependent DNA replication	45 out of 11937 genes, 0.4%	65 out of 19550 genes, 0.3%	1
regulation of leukocyte chemotaxis	30 out of 11937 genes, 0.3%	42 out of 19550 genes, 0.2%	1
dopamine transport	14 out of 11937 genes, 0.1%	18 out of 19550 genes, 0.1%	1
membrane docking	14 out of 11937 genes, 0.1%	18 out of 19550 genes, 0.1%	1
response to reactive oxygen species	86 out of 11937 genes, 0.7%	129 out of 19550 genes, 0.7%	1
endothelial cell proliferation	63 out of 11937 genes, 0.5%	93 out of 19550 genes, 0.5%	1
regulation of ion homeostasis	54 out of 11937 genes, 0.5%	79 out of 19550 genes, 0.4%	1
regulation of sensory perception	28 out of 11937 genes, 0.2%	39 out of 19550 genes, 0.2%	1
purine nucleotide biosynthetic process	136 out of 11937 genes, 1.1%	208 out of 19550 genes, 1.1%	1
nucleoside triphosphate catabolic process	373 out of 11937 genes, 3.1%	587 out of 19550 genes, 3.0%	1
cellular glucose homeostasis	16 out of 11937 genes, 0.1%	21 out of 19550 genes, 0.1%	1
purine nucleobase metabolic process	16 out of 11937 genes, 0.1%	21 out of 19550 genes, 0.1%	1
positive regulation of endothelial cell migration	16 out of 11937 genes, 0.1%	21 out of 19550 genes, 0.1%	1
response to cortisol stimulus	16 out of 11937 genes, 0.1%	21 out of 19550 genes, 0.1%	1
tube development	257 out of 11937 genes, 2.2%	401 out of 19550 genes, 2.1%	1
protein alkylation	84 out of 11937 genes, 0.7%	126 out of 19550 genes, 0.6%	1
response to interferon-beta	24 out of 11937 genes, 0.2%	33 out of 19550 genes, 0.2%	1
organic acid metabolic process	592 out of 11937 genes, 5.0%	940 out of 19550 genes, 4.8%	1
columnar/cuboidal epithelial cell differentiation	18 out of 11937 genes, 0.2%	24 out of 19550 genes, 0.1%	1
regulation of epithelial cell proliferation	18 out of 11937 genes, 0.2%	24 out of 19550 genes, 0.1%	1
purine nucleoside triphosphate catabolic process	371 out of 11937 genes, 3.1%	584 out of 19550 genes, 3.0%	1
behavioral defense response	22 out of 11937 genes, 0.2%	30 out of 19550 genes, 0.2%	1
post-embryonic development	22 out of 11937 genes, 0.2%	30 out of 19550 genes, 0.2%	1
glucose homeostasis	22 out of 11937 genes, 0.2%	30 out of 19550 genes, 0.2%	1
cellular divalent inorganic cation homeostasis	151 out of 11937 genes, 1.3%	232 out of 19550 genes, 1.2%	1
regulation of intracellular protein kinase cascade	240 out of 11937 genes, 2.0%	374 out of 19550 genes, 1.9%	1
skeletal system development	96 out of 11937 genes, 0.8%	145 out of 19550 genes, 0.7%	1
regulation of endocytosis	82 out of 11937 genes, 0.7%	123 out of 19550 genes, 0.6%	1
tissue remodeling	50 out of 11937 genes, 0.4%	73 out of 19550 genes, 0.4%	1
mismatch repair	7 out of 11937 genes, 0.1%	8 out of 19550 genes, 0.0%	1
glutamate metabolic process	7 out of 11937 genes, 0.1%	8 out of 19550 genes, 0.0%	1
copper ion transport	7 out of 11937 genes, 0.1%	8 out of 19550 genes, 0.0%	1
manganese ion transport	7 out of 11937 genes, 0.1%	8 out of 19550 genes, 0.0%	1
purine ribonucleoside diphosphate metabolic process	7 out of 11937 genes, 0.1%	8 out of 19550 genes, 0.0%	1
regulation of nuclease activity	7 out of 11937 genes, 0.1%	8 out of 19550 genes, 0.0%	1
amino acid import	7 out of 11937 genes, 0.1%	8 out of 19550 genes, 0.0%	1
nose development	7 out of 11937 genes, 0.1%	8 out of 19550 genes, 0.0%	1
regulation of phosphoprotein phosphatase activity	7 out of 11937 genes, 0.1%	8 out of 19550 genes, 0.0%	1
negative regulation of behavior	7 out of 11937 genes, 0.1%	8 out of 19550 genes, 0.0%	1
positive regulation by symbiont of host innate immune response	7 out of 11937 genes, 0.1%	8 out of 19550 genes, 0.0%	1
modulation by symbiont of host innate immune response	7 out of 11937 genes, 0.1%	8 out of 19550 genes, 0.0%	1
positive regulation by organism of innate immune response in other organism involved in symbiotic interaction	7 out of 11937 genes, 0.1%	8 out of 19550 genes, 0.0%	1
modulation by organism of innate immune response in other organism involved in symbiotic interaction	7 out of 11937 genes, 0.1%	8 out of 19550 genes, 0.0%	1
modulation by organism of immune response of other organism involved in symbiotic interaction	7 out of 11937 genes, 0.1%	8 out of 19550 genes, 0.0%	1
modulation by symbiont of host immune response	7 out of 11937 genes, 0.1%	8 out of 19550 genes, 0.0%	1
positive regulation by organism of immune response of other organism involved in symbiotic interaction	7 out of 11937 genes, 0.1%	8 out of 19550 genes, 0.0%	1
positive regulation by symbiont of host immune response	7 out of 11937 genes, 0.1%	8 out of 19550 genes, 0.0%	1
response to host immune response	7 out of 11937 genes, 0.1%	8 out of 19550 genes, 0.0%	1
organophosphate biosynthetic process	7 out of 11937 genes, 0.1%	8 out of 19550 genes, 0.0%	1
aging	66 out of 11937 genes, 0.6%	98 out of 19550 genes, 0.5%	1
carboxylic acid metabolic process	578 out of 11937 genes, 4.8%	918 out of 19550 genes, 4.7%	1
regulation of leukocyte proliferation	80 out of 11937 genes, 0.7%	120 out of 19550 genes, 0.6%	1
lymphocyte costimulation	48 out of 11937 genes, 0.4%	70 out of 19550 genes, 0.4%	1
regulation of translation	37 out of 11937 genes, 0.3%	53 out of 19550 genes, 0.3%	1
positive regulation of locomotion	57 out of 11937 genes, 0.5%	84 out of 19550 genes, 0.4%	1
regulation of protein stability	64 out of 11937 genes, 0.5%	95 out of 19550 genes, 0.5%	1
peptide secretion	92 out of 11937 genes, 0.8%	139 out of 19550 genes, 0.7%	1
regulation of leukocyte migration	35 out of 11937 genes, 0.3%	50 out of 19550 genes, 0.3%	1
hair cycle process	35 out of 11937 genes, 0.3%	50 out of 19550 genes, 0.3%	1
tetrapyrrole metabolic process	35 out of 11937 genes, 0.3%	50 out of 19550 genes, 0.3%	1
'de novo' protein folding	46 out of 11937 genes, 0.4%	67 out of 19550 genes, 0.3%	1
regulation of chemotaxis	46 out of 11937 genes, 0.4%	67 out of 19550 genes, 0.3%	1
hormone-mediated signaling pathway	55 out of 11937 genes, 0.5%	81 out of 19550 genes, 0.4%	1
porphyrin-containing compound metabolic process	33 out of 11937 genes, 0.3%	47 out of 19550 genes, 0.2%	1
fatty acid transport	33 out of 11937 genes, 0.3%	47 out of 19550 genes, 0.2%	1
regulation of cell proliferation	300 out of 11937 genes, 2.5%	471 out of 19550 genes, 2.4%	1
pattern specification process	222 out of 11937 genes, 1.9%	346 out of 19550 genes, 1.8%	1
ribonucleoside triphosphate catabolic process	369 out of 11937 genes, 3.1%	582 out of 19550 genes, 3.0%	1
purine ribonucleoside triphosphate catabolic process	369 out of 11937 genes, 3.1%	582 out of 19550 genes, 3.0%	1
cellular ketone metabolic process	586 out of 11937 genes, 4.9%	932 out of 19550 genes, 4.8%	1
organ morphogenesis	472 out of 11937 genes, 4.0%	748 out of 19550 genes, 3.8%	1
nuclear-transcribed mRNA catabolic process, deadenylation-dependent decay	31 out of 11937 genes, 0.3%	44 out of 19550 genes, 0.2%	1
cellular macromolecular complex assembly	168 out of 11937 genes, 1.4%	260 out of 19550 genes, 1.3%	1
positive regulation of cellular biosynthetic process	124 out of 11937 genes, 1.0%	190 out of 19550 genes, 1.0%	1
response to oxygen radical	9 out of 11937 genes, 0.1%	11 out of 19550 genes, 0.1%	1
polyamine catabolic process	9 out of 11937 genes, 0.1%	11 out of 19550 genes, 0.1%	1
phosphatidylglycerol biosynthetic process	9 out of 11937 genes, 0.1%	11 out of 19550 genes, 0.1%	1
substrate-dependent cell migration	9 out of 11937 genes, 0.1%	11 out of 19550 genes, 0.1%	1
meiotic prophase I	9 out of 11937 genes, 0.1%	11 out of 19550 genes, 0.1%	1
striated muscle cell proliferation	9 out of 11937 genes, 0.1%	11 out of 19550 genes, 0.1%	1
positive regulation of cell-cell adhesion	9 out of 11937 genes, 0.1%	11 out of 19550 genes, 0.1%	1
negative regulation of protein binding	9 out of 11937 genes, 0.1%	11 out of 19550 genes, 0.1%	1
cellular polysaccharide biosynthetic process	9 out of 11937 genes, 0.1%	11 out of 19550 genes, 0.1%	1
cellular carbohydrate biosynthetic process	9 out of 11937 genes, 0.1%	11 out of 19550 genes, 0.1%	1
histone arginine methylation	9 out of 11937 genes, 0.1%	11 out of 19550 genes, 0.1%	1
amide transport	9 out of 11937 genes, 0.1%	11 out of 19550 genes, 0.1%	1
nuclear matrix organization	9 out of 11937 genes, 0.1%	11 out of 19550 genes, 0.1%	1
epidermis morphogenesis	9 out of 11937 genes, 0.1%	11 out of 19550 genes, 0.1%	1
regulation of dendrite morphogenesis	9 out of 11937 genes, 0.1%	11 out of 19550 genes, 0.1%	1
prophase	9 out of 11937 genes, 0.1%	11 out of 19550 genes, 0.1%	1
response to defenses of other organism involved in symbiotic interaction	9 out of 11937 genes, 0.1%	11 out of 19550 genes, 0.1%	1
cardiac cell development	9 out of 11937 genes, 0.1%	11 out of 19550 genes, 0.1%	1
cardiac muscle cell development	9 out of 11937 genes, 0.1%	11 out of 19550 genes, 0.1%	1
inner ear receptor stereocilium organization	9 out of 11937 genes, 0.1%	11 out of 19550 genes, 0.1%	1
cell cycle phase	445 out of 11937 genes, 3.7%	705 out of 19550 genes, 3.6%	1
regulation of cyclase activity	40 out of 11937 genes, 0.3%	58 out of 19550 genes, 0.3%	1
embryonic skeletal system morphogenesis	27 out of 11937 genes, 0.2%	38 out of 19550 genes, 0.2%	1
catecholamine transport	27 out of 11937 genes, 0.2%	38 out of 19550 genes, 0.2%	1
cellular component disassembly	49 out of 11937 genes, 0.4%	72 out of 19550 genes, 0.4%	1
peptide transport	103 out of 11937 genes, 0.9%	157 out of 19550 genes, 0.8%	1
hair follicle development	25 out of 11937 genes, 0.2%	35 out of 19550 genes, 0.2%	1
protein localization	607 out of 11937 genes, 5.1%	967 out of 19550 genes, 4.9%	1
ribonucleoside triphosphate metabolic process	415 out of 11937 genes, 3.5%	657 out of 19550 genes, 3.4%	1
maturation of 5.8S rRNA	4 out of 11937 genes, 0.0%	4 out of 19550 genes, 0.0%	1
regulation of T cell mediated cytotoxicity	4 out of 11937 genes, 0.0%	4 out of 19550 genes, 0.0%	1
innate immune response activating cell surface receptor signaling pathway	4 out of 11937 genes, 0.0%	4 out of 19550 genes, 0.0%	1
mature B cell differentiation involved in immune response	4 out of 11937 genes, 0.0%	4 out of 19550 genes, 0.0%	1
regulation of T cell mediated immunity	4 out of 11937 genes, 0.0%	4 out of 19550 genes, 0.0%	1
cilium movement	4 out of 11937 genes, 0.0%	4 out of 19550 genes, 0.0%	1
epithelial cilium movement	4 out of 11937 genes, 0.0%	4 out of 19550 genes, 0.0%	1
galactose metabolic process	4 out of 11937 genes, 0.0%	4 out of 19550 genes, 0.0%	1
mannose metabolic process	4 out of 11937 genes, 0.0%	4 out of 19550 genes, 0.0%	1
regulation of cellular amino acid metabolic process	4 out of 11937 genes, 0.0%	4 out of 19550 genes, 0.0%	1
threonine metabolic process	4 out of 11937 genes, 0.0%	4 out of 19550 genes, 0.0%	1
sphingosine metabolic process	4 out of 11937 genes, 0.0%	4 out of 19550 genes, 0.0%	1
nuclear migration	4 out of 11937 genes, 0.0%	4 out of 19550 genes, 0.0%	1
neuromuscular synaptic transmission	4 out of 11937 genes, 0.0%	4 out of 19550 genes, 0.0%	1
deoxyribonucleoside metabolic process	4 out of 11937 genes, 0.0%	4 out of 19550 genes, 0.0%	1
deoxyribonucleoside triphosphate catabolic process	4 out of 11937 genes, 0.0%	4 out of 19550 genes, 0.0%	1
regulation of gastrulation	4 out of 11937 genes, 0.0%	4 out of 19550 genes, 0.0%	1
response to cycloalkane	4 out of 11937 genes, 0.0%	4 out of 19550 genes, 0.0%	1
skeletal myofibril assembly	4 out of 11937 genes, 0.0%	4 out of 19550 genes, 0.0%	1
response to stimulus involved in regulation of muscle adaptation	4 out of 11937 genes, 0.0%	4 out of 19550 genes, 0.0%	1
aromatic amino acid transport	4 out of 11937 genes, 0.0%	4 out of 19550 genes, 0.0%	1
purine nucleotide transport	4 out of 11937 genes, 0.0%	4 out of 19550 genes, 0.0%	1
olfactory bulb interneuron development	4 out of 11937 genes, 0.0%	4 out of 19550 genes, 0.0%	1
tangential migration from the subventricular zone to the olfactory bulb	4 out of 11937 genes, 0.0%	4 out of 19550 genes, 0.0%	1
regulation of sulfur amino acid metabolic process	4 out of 11937 genes, 0.0%	4 out of 19550 genes, 0.0%	1
transforming growth factor beta3 production	4 out of 11937 genes, 0.0%	4 out of 19550 genes, 0.0%	1
negative regulation of toll-like receptor signaling pathway	4 out of 11937 genes, 0.0%	4 out of 19550 genes, 0.0%	1
toll-like receptor 4 signaling pathway	4 out of 11937 genes, 0.0%	4 out of 19550 genes, 0.0%	1
response to type I interferon	4 out of 11937 genes, 0.0%	4 out of 19550 genes, 0.0%	1
NF-kappaB import into nucleus	4 out of 11937 genes, 0.0%	4 out of 19550 genes, 0.0%	1
regulation of mesodermal cell fate specification	4 out of 11937 genes, 0.0%	4 out of 19550 genes, 0.0%	1
regulation of sulfur metabolic process	4 out of 11937 genes, 0.0%	4 out of 19550 genes, 0.0%	1
regulation of Golgi to plasma membrane protein transport	4 out of 11937 genes, 0.0%	4 out of 19550 genes, 0.0%	1
purine-containing compound salvage	4 out of 11937 genes, 0.0%	4 out of 19550 genes, 0.0%	1
proteasome assembly	4 out of 11937 genes, 0.0%	4 out of 19550 genes, 0.0%	1
negative regulation of CD4-positive, alpha-beta T cell differentiation	4 out of 11937 genes, 0.0%	4 out of 19550 genes, 0.0%	1
maintenance of fidelity involved in DNA-dependent DNA replication	4 out of 11937 genes, 0.0%	4 out of 19550 genes, 0.0%	1
development of secondary sexual characteristics	4 out of 11937 genes, 0.0%	4 out of 19550 genes, 0.0%	1
external encapsulating structure organization	4 out of 11937 genes, 0.0%	4 out of 19550 genes, 0.0%	1
negative regulation of T-helper cell differentiation	4 out of 11937 genes, 0.0%	4 out of 19550 genes, 0.0%	1
negative regulation of striated muscle contraction	4 out of 11937 genes, 0.0%	4 out of 19550 genes, 0.0%	1
negative regulation of alpha-beta T cell activation	4 out of 11937 genes, 0.0%	4 out of 19550 genes, 0.0%	1
negative regulation of alpha-beta T cell differentiation	4 out of 11937 genes, 0.0%	4 out of 19550 genes, 0.0%	1
vesicle transport along microtubule	4 out of 11937 genes, 0.0%	4 out of 19550 genes, 0.0%	1
metaphase plate congression	4 out of 11937 genes, 0.0%	4 out of 19550 genes, 0.0%	1
neural plate pattern specification	4 out of 11937 genes, 0.0%	4 out of 19550 genes, 0.0%	1
neural plate regionalization	4 out of 11937 genes, 0.0%	4 out of 19550 genes, 0.0%	1
cell differentiation involved in kidney development	4 out of 11937 genes, 0.0%	4 out of 19550 genes, 0.0%	1
renal filtration cell differentiation	4 out of 11937 genes, 0.0%	4 out of 19550 genes, 0.0%	1
inclusion body assembly	4 out of 11937 genes, 0.0%	4 out of 19550 genes, 0.0%	1
mesenchyme morphogenesis	4 out of 11937 genes, 0.0%	4 out of 19550 genes, 0.0%	1
regulation of mesoderm development	4 out of 11937 genes, 0.0%	4 out of 19550 genes, 0.0%	1
negative regulation of CD4-positive, alpha-beta T cell activation	4 out of 11937 genes, 0.0%	4 out of 19550 genes, 0.0%	1
cellular catabolic process	886 out of 11937 genes, 7.4%	1419 out of 19550 genes, 7.3%	1
regulation of organ formation	23 out of 11937 genes, 0.2%	32 out of 19550 genes, 0.2%	1
rRNA processing	23 out of 11937 genes, 0.2%	32 out of 19550 genes, 0.2%	1
coagulation	23 out of 11937 genes, 0.2%	32 out of 19550 genes, 0.2%	1
nucleoside monophosphate catabolic process	11 out of 11937 genes, 0.1%	14 out of 19550 genes, 0.1%	1
negative regulation of axon extension	11 out of 11937 genes, 0.1%	14 out of 19550 genes, 0.1%	1
positive regulation of epithelial cell proliferation	11 out of 11937 genes, 0.1%	14 out of 19550 genes, 0.1%	1
lymphocyte activation involved in immune response	21 out of 11937 genes, 0.2%	29 out of 19550 genes, 0.1%	1
histone lysine methylation	21 out of 11937 genes, 0.2%	29 out of 19550 genes, 0.1%	1
gliogenesis	75 out of 11937 genes, 0.6%	113 out of 19550 genes, 0.6%	1
positive regulation of ion transmembrane transporter activity	19 out of 11937 genes, 0.2%	26 out of 19550 genes, 0.1%	1
T cell activation involved in immune response	13 out of 11937 genes, 0.1%	17 out of 19550 genes, 0.1%	1
NAD metabolic process	13 out of 11937 genes, 0.1%	17 out of 19550 genes, 0.1%	1
activin receptor signaling pathway	13 out of 11937 genes, 0.1%	17 out of 19550 genes, 0.1%	1
purine-containing compound metabolic process	515 out of 11937 genes, 4.3%	819 out of 19550 genes, 4.2%	1
cell morphogenesis involved in neuron differentiation	175 out of 11937 genes, 1.5%	272 out of 19550 genes, 1.4%	1
developmental process involved in reproduction	319 out of 11937 genes, 2.7%	503 out of 19550 genes, 2.6%	1
zinc ion transport	17 out of 11937 genes, 0.1%	23 out of 19550 genes, 0.1%	1
regulation of alpha-beta T cell differentiation	17 out of 11937 genes, 0.1%	23 out of 19550 genes, 0.1%	1
lens development in camera-type eye	15 out of 11937 genes, 0.1%	20 out of 19550 genes, 0.1%	1
pyrimidine nucleoside triphosphate biosynthetic process	15 out of 11937 genes, 0.1%	20 out of 19550 genes, 0.1%	1
olfactory lobe development	15 out of 11937 genes, 0.1%	20 out of 19550 genes, 0.1%	1
negative regulation of protein kinase activity	34 out of 11937 genes, 0.3%	49 out of 19550 genes, 0.3%	1
protein activation cascade	34 out of 11937 genes, 0.3%	49 out of 19550 genes, 0.3%	1
adult locomotory behavior	43 out of 11937 genes, 0.4%	63 out of 19550 genes, 0.3%	1
peptide hormone secretion	85 out of 11937 genes, 0.7%	129 out of 19550 genes, 0.7%	1
cellular nitrogen compound catabolic process	420 out of 11937 genes, 3.5%	666 out of 19550 genes, 3.4%	1
cellular component assembly involved in morphogenesis	50 out of 11937 genes, 0.4%	74 out of 19550 genes, 0.4%	1
molting cycle	41 out of 11937 genes, 0.3%	60 out of 19550 genes, 0.3%	1
mitotic cell cycle	328 out of 11937 genes, 2.7%	518 out of 19550 genes, 2.6%	1
purine ribonucleoside triphosphate metabolic process	413 out of 11937 genes, 3.5%	655 out of 19550 genes, 3.4%	1
heterocycle metabolic process	666 out of 11937 genes, 5.6%	1064 out of 19550 genes, 5.4%	1
response to hypoxia	30 out of 11937 genes, 0.3%	43 out of 19550 genes, 0.2%	1
response to decreased oxygen levels	30 out of 11937 genes, 0.3%	43 out of 19550 genes, 0.2%	1
oxidoreduction coenzyme metabolic process	39 out of 11937 genes, 0.3%	57 out of 19550 genes, 0.3%	1
purine-containing compound biosynthetic process	137 out of 11937 genes, 1.1%	212 out of 19550 genes, 1.1%	1
epithelial cell differentiation	115 out of 11937 genes, 1.0%	177 out of 19550 genes, 0.9%	1
immune system process	964 out of 11937 genes, 8.1%	1548 out of 19550 genes, 7.9%	1
cellular component disassembly at cellular level	46 out of 11937 genes, 0.4%	68 out of 19550 genes, 0.3%	1
protein polyubiquitination	37 out of 11937 genes, 0.3%	54 out of 19550 genes, 0.3%	1
glycogen metabolic process	26 out of 11937 genes, 0.2%	37 out of 19550 genes, 0.2%	1
energy reserve metabolic process	26 out of 11937 genes, 0.2%	37 out of 19550 genes, 0.2%	1
cell differentiation in spinal cord	26 out of 11937 genes, 0.2%	37 out of 19550 genes, 0.2%	1
positive regulation of mononuclear cell proliferation	26 out of 11937 genes, 0.2%	37 out of 19550 genes, 0.2%	1
vasodilation	26 out of 11937 genes, 0.2%	37 out of 19550 genes, 0.2%	1
regulation of viral reproduction	26 out of 11937 genes, 0.2%	37 out of 19550 genes, 0.2%	1
establishment of protein localization to organelle	26 out of 11937 genes, 0.2%	37 out of 19550 genes, 0.2%	1
membrane organization	140 out of 11937 genes, 1.2%	217 out of 19550 genes, 1.1%	1
adenylate cyclase-modulating G-protein coupled receptor signaling pathway	72 out of 11937 genes, 0.6%	109 out of 19550 genes, 0.6%	1
positive regulation of cell migration	44 out of 11937 genes, 0.4%	65 out of 19550 genes, 0.3%	1
positive regulation of cellular component movement	44 out of 11937 genes, 0.4%	65 out of 19550 genes, 0.3%	1
positive regulation of cell motility	44 out of 11937 genes, 0.4%	65 out of 19550 genes, 0.3%	1
mitotic sister chromatid segregation	24 out of 11937 genes, 0.2%	34 out of 19550 genes, 0.2%	1
spindle organization	24 out of 11937 genes, 0.2%	34 out of 19550 genes, 0.2%	1
regulation of wound healing	24 out of 11937 genes, 0.2%	34 out of 19550 genes, 0.2%	1
cell cycle arrest	94 out of 11937 genes, 0.8%	144 out of 19550 genes, 0.7%	1
protein catabolic process	262 out of 11937 genes, 2.2%	413 out of 19550 genes, 2.1%	1
osteoblast differentiation	22 out of 11937 genes, 0.2%	31 out of 19550 genes, 0.2%	1
positive regulation of actin filament bundle assembly	22 out of 11937 genes, 0.2%	31 out of 19550 genes, 0.2%	1
regulation of alpha-beta T cell activation	22 out of 11937 genes, 0.2%	31 out of 19550 genes, 0.2%	1
microtubule-based transport	33 out of 11937 genes, 0.3%	48 out of 19550 genes, 0.2%	1
cytoskeleton-dependent intracellular transport	33 out of 11937 genes, 0.3%	48 out of 19550 genes, 0.2%	1
positive regulation of T cell differentiation	33 out of 11937 genes, 0.3%	48 out of 19550 genes, 0.2%	1
positive regulation of lymphocyte differentiation	33 out of 11937 genes, 0.3%	48 out of 19550 genes, 0.2%	1
regulation of membrane depolarization	6 out of 11937 genes, 0.1%	7 out of 19550 genes, 0.0%	1
histidine metabolic process	6 out of 11937 genes, 0.1%	7 out of 19550 genes, 0.0%	1
oligopeptide transport	6 out of 11937 genes, 0.1%	7 out of 19550 genes, 0.0%	1
lysosome organization	6 out of 11937 genes, 0.1%	7 out of 19550 genes, 0.0%	1
mesoderm migration involved in gastrulation	6 out of 11937 genes, 0.1%	7 out of 19550 genes, 0.0%	1
histidine family amino acid metabolic process	6 out of 11937 genes, 0.1%	7 out of 19550 genes, 0.0%	1
purine nucleobase biosynthetic process	6 out of 11937 genes, 0.1%	7 out of 19550 genes, 0.0%	1
purine nucleoside diphosphate biosynthetic process	6 out of 11937 genes, 0.1%	7 out of 19550 genes, 0.0%	1
purine ribonucleoside diphosphate biosynthetic process	6 out of 11937 genes, 0.1%	7 out of 19550 genes, 0.0%	1
ribonucleoside diphosphate biosynthetic process	6 out of 11937 genes, 0.1%	7 out of 19550 genes, 0.0%	1
telomere capping	6 out of 11937 genes, 0.1%	7 out of 19550 genes, 0.0%	1
histone phosphorylation	6 out of 11937 genes, 0.1%	7 out of 19550 genes, 0.0%	1
regulation of lysosomal lumen pH	6 out of 11937 genes, 0.1%	7 out of 19550 genes, 0.0%	1
cytokine metabolic process	6 out of 11937 genes, 0.1%	7 out of 19550 genes, 0.0%	1
short-chain fatty acid metabolic process	6 out of 11937 genes, 0.1%	7 out of 19550 genes, 0.0%	1
branch elongation of an epithelium	6 out of 11937 genes, 0.1%	7 out of 19550 genes, 0.0%	1
positive regulation of lymphocyte apoptotic process	6 out of 11937 genes, 0.1%	7 out of 19550 genes, 0.0%	1
sulfur compound transport	6 out of 11937 genes, 0.1%	7 out of 19550 genes, 0.0%	1
positive regulation of leukocyte apoptotic process	6 out of 11937 genes, 0.1%	7 out of 19550 genes, 0.0%	1
heterocycle catabolic process	412 out of 11937 genes, 3.5%	655 out of 19550 genes, 3.4%	1
response to stimulus	4617 out of 11937 genes, 38.7%	7510 out of 19550 genes, 38.4%	1
cell projection assembly	68 out of 11937 genes, 0.6%	103 out of 19550 genes, 0.5%	1
regulation of translational initiation	20 out of 11937 genes, 0.2%	28 out of 19550 genes, 0.1%	1
keratinocyte differentiation	20 out of 11937 genes, 0.2%	28 out of 19550 genes, 0.1%	1
positive regulation of transporter activity	20 out of 11937 genes, 0.2%	28 out of 19550 genes, 0.1%	1
neurotransmitter metabolic process	20 out of 11937 genes, 0.2%	28 out of 19550 genes, 0.1%	1
regulation of myoblast differentiation	20 out of 11937 genes, 0.2%	28 out of 19550 genes, 0.1%	1
cellular membrane organization	139 out of 11937 genes, 1.2%	216 out of 19550 genes, 1.1%	1
complement activation	18 out of 11937 genes, 0.2%	25 out of 19550 genes, 0.1%	1
pyrimidine ribonucleotide metabolic process	18 out of 11937 genes, 0.2%	25 out of 19550 genes, 0.1%	1
endothelial cell migration	18 out of 11937 genes, 0.2%	25 out of 19550 genes, 0.1%	1
organelle fusion	18 out of 11937 genes, 0.2%	25 out of 19550 genes, 0.1%	1
negative regulation of immune system process	78 out of 11937 genes, 0.7%	119 out of 19550 genes, 0.6%	1
skeletal system morphogenesis	38 out of 11937 genes, 0.3%	56 out of 19550 genes, 0.3%	1
embryonic axis specification	16 out of 11937 genes, 0.1%	22 out of 19550 genes, 0.1%	1
phasic smooth muscle contraction	16 out of 11937 genes, 0.1%	22 out of 19550 genes, 0.1%	1
positive regulation of protein complex assembly	16 out of 11937 genes, 0.1%	22 out of 19550 genes, 0.1%	1
genitalia morphogenesis	16 out of 11937 genes, 0.1%	22 out of 19550 genes, 0.1%	1
genitalia development	16 out of 11937 genes, 0.1%	22 out of 19550 genes, 0.1%	1
regulation of glucose transport	45 out of 11937 genes, 0.4%	67 out of 19550 genes, 0.3%	1
rRNA modification	8 out of 11937 genes, 0.1%	10 out of 19550 genes, 0.1%	1
cGMP biosynthetic process	8 out of 11937 genes, 0.1%	10 out of 19550 genes, 0.1%	1
activation of cysteine-type endopeptidase activity involved in apoptotic process	8 out of 11937 genes, 0.1%	10 out of 19550 genes, 0.1%	1
cellular component disassembly involved in apoptotic process	8 out of 11937 genes, 0.1%	10 out of 19550 genes, 0.1%	1
purine nucleoside diphosphate metabolic process	8 out of 11937 genes, 0.1%	10 out of 19550 genes, 0.1%	1
positive regulation of endopeptidase activity	8 out of 11937 genes, 0.1%	10 out of 19550 genes, 0.1%	1
axon choice point recognition	8 out of 11937 genes, 0.1%	10 out of 19550 genes, 0.1%	1
peptide hormone processing	8 out of 11937 genes, 0.1%	10 out of 19550 genes, 0.1%	1
nicotinamide nucleotide biosynthetic process	8 out of 11937 genes, 0.1%	10 out of 19550 genes, 0.1%	1
pyridine nucleotide biosynthetic process	8 out of 11937 genes, 0.1%	10 out of 19550 genes, 0.1%	1
cell proliferation in hindbrain	8 out of 11937 genes, 0.1%	10 out of 19550 genes, 0.1%	1
cell proliferation in external granule layer	8 out of 11937 genes, 0.1%	10 out of 19550 genes, 0.1%	1
positive regulation of blood coagulation	8 out of 11937 genes, 0.1%	10 out of 19550 genes, 0.1%	1
cell junction maintenance	8 out of 11937 genes, 0.1%	10 out of 19550 genes, 0.1%	1
positive regulation of cysteine-type endopeptidase activity involved in apoptotic process	8 out of 11937 genes, 0.1%	10 out of 19550 genes, 0.1%	1
regulation of cysteine-type endopeptidase activity involved in apoptotic process	8 out of 11937 genes, 0.1%	10 out of 19550 genes, 0.1%	1
cGMP metabolic process	8 out of 11937 genes, 0.1%	10 out of 19550 genes, 0.1%	1
synapse organization	8 out of 11937 genes, 0.1%	10 out of 19550 genes, 0.1%	1
positive regulation of coagulation	8 out of 11937 genes, 0.1%	10 out of 19550 genes, 0.1%	1
response to host defenses	8 out of 11937 genes, 0.1%	10 out of 19550 genes, 0.1%	1
cellular component maintenance at cellular level	8 out of 11937 genes, 0.1%	10 out of 19550 genes, 0.1%	1
pyridine-containing compound biosynthetic process	8 out of 11937 genes, 0.1%	10 out of 19550 genes, 0.1%	1
response to host	8 out of 11937 genes, 0.1%	10 out of 19550 genes, 0.1%	1
activation of cysteine-type endopeptidase activity	8 out of 11937 genes, 0.1%	10 out of 19550 genes, 0.1%	1
positive regulation of hemostasis	8 out of 11937 genes, 0.1%	10 out of 19550 genes, 0.1%	1
regulation of cysteine-type endopeptidase activity	8 out of 11937 genes, 0.1%	10 out of 19550 genes, 0.1%	1
positive regulation of cysteine-type endopeptidase activity	8 out of 11937 genes, 0.1%	10 out of 19550 genes, 0.1%	1
cellular protein catabolic process	249 out of 11937 genes, 2.1%	393 out of 19550 genes, 2.0%	1
methylation	93 out of 11937 genes, 0.8%	143 out of 19550 genes, 0.7%	1
macromolecule methylation	93 out of 11937 genes, 0.8%	143 out of 19550 genes, 0.7%	1
glucosamine metabolic process	14 out of 11937 genes, 0.1%	19 out of 19550 genes, 0.1%	1
RNA-dependent DNA replication	14 out of 11937 genes, 0.1%	19 out of 19550 genes, 0.1%	1
pyrimidine ribonucleoside triphosphate metabolic process	14 out of 11937 genes, 0.1%	19 out of 19550 genes, 0.1%	1
pyrimidine ribonucleoside triphosphate biosynthetic process	14 out of 11937 genes, 0.1%	19 out of 19550 genes, 0.1%	1
deoxyribonucleotide metabolic process	14 out of 11937 genes, 0.1%	19 out of 19550 genes, 0.1%	1
2'-deoxyribonucleotide metabolic process	14 out of 11937 genes, 0.1%	19 out of 19550 genes, 0.1%	1
positive regulation of transmembrane transport	14 out of 11937 genes, 0.1%	19 out of 19550 genes, 0.1%	1
response to cAMP	14 out of 11937 genes, 0.1%	19 out of 19550 genes, 0.1%	1
very long-chain fatty acid metabolic process	36 out of 11937 genes, 0.3%	53 out of 19550 genes, 0.3%	1
cellular glucan metabolic process	36 out of 11937 genes, 0.3%	53 out of 19550 genes, 0.3%	1
positive regulation of Rho GTPase activity	36 out of 11937 genes, 0.3%	53 out of 19550 genes, 0.3%	1
glucan metabolic process	36 out of 11937 genes, 0.3%	53 out of 19550 genes, 0.3%	1
G1 phase	36 out of 11937 genes, 0.3%	53 out of 19550 genes, 0.3%	1
cardiac muscle hypertrophy	10 out of 11937 genes, 0.1%	13 out of 19550 genes, 0.1%	1
synaptic transmission, cholinergic	10 out of 11937 genes, 0.1%	13 out of 19550 genes, 0.1%	1
multicellular organismal aging	10 out of 11937 genes, 0.1%	13 out of 19550 genes, 0.1%	1
detection of mechanical stimulus involved in sensory perception	10 out of 11937 genes, 0.1%	13 out of 19550 genes, 0.1%	1
detection of mechanical stimulus	10 out of 11937 genes, 0.1%	13 out of 19550 genes, 0.1%	1
reflex	10 out of 11937 genes, 0.1%	13 out of 19550 genes, 0.1%	1
pyrimidine-containing compound transmembrane transport	10 out of 11937 genes, 0.1%	13 out of 19550 genes, 0.1%	1
release of cytochrome c from mitochondria	12 out of 11937 genes, 0.1%	16 out of 19550 genes, 0.1%	1
post-embryonic morphogenesis	12 out of 11937 genes, 0.1%	16 out of 19550 genes, 0.1%	1
oligodendrocyte development	12 out of 11937 genes, 0.1%	16 out of 19550 genes, 0.1%	1
synaptic vesicle exocytosis	12 out of 11937 genes, 0.1%	16 out of 19550 genes, 0.1%	1
regulation of catecholamine metabolic process	12 out of 11937 genes, 0.1%	16 out of 19550 genes, 0.1%	1
diacylglycerol metabolic process	12 out of 11937 genes, 0.1%	16 out of 19550 genes, 0.1%	1
synaptic vesicle transport	12 out of 11937 genes, 0.1%	16 out of 19550 genes, 0.1%	1
negative regulation of developmental growth	12 out of 11937 genes, 0.1%	16 out of 19550 genes, 0.1%	1
negative regulation of axonogenesis	12 out of 11937 genes, 0.1%	16 out of 19550 genes, 0.1%	1
regulation of gene silencing	12 out of 11937 genes, 0.1%	16 out of 19550 genes, 0.1%	1
negative regulation of gene silencing	12 out of 11937 genes, 0.1%	16 out of 19550 genes, 0.1%	1
apoptotic signaling pathway	12 out of 11937 genes, 0.1%	16 out of 19550 genes, 0.1%	1
embryonic skeletal system development	27 out of 11937 genes, 0.2%	39 out of 19550 genes, 0.2%	1
regulation of gliogenesis	50 out of 11937 genes, 0.4%	75 out of 19550 genes, 0.4%	1
lymphocyte differentiation	158 out of 11937 genes, 1.3%	247 out of 19550 genes, 1.3%	1
chromosome segregation	43 out of 11937 genes, 0.4%	64 out of 19550 genes, 0.3%	1
regulation of cytokine biosynthetic process	62 out of 11937 genes, 0.5%	94 out of 19550 genes, 0.5%	1
one-carbon metabolic process	79 out of 11937 genes, 0.7%	121 out of 19550 genes, 0.6%	1
developmental growth	79 out of 11937 genes, 0.7%	121 out of 19550 genes, 0.6%	1
microtubule polymerization or depolymerization	34 out of 11937 genes, 0.3%	50 out of 19550 genes, 0.3%	1
hydrogen peroxide metabolic process	25 out of 11937 genes, 0.2%	36 out of 19550 genes, 0.2%	1
blood circulation	141 out of 11937 genes, 1.2%	220 out of 19550 genes, 1.1%	1
proteolysis	328 out of 11937 genes, 2.7%	521 out of 19550 genes, 2.7%	1
proteolysis involved in cellular protein catabolic process	248 out of 11937 genes, 2.1%	392 out of 19550 genes, 2.0%	1
spinal cord development	32 out of 11937 genes, 0.3%	47 out of 19550 genes, 0.2%	1
B cell activation	32 out of 11937 genes, 0.3%	47 out of 19550 genes, 0.2%	1
regulation of chromosome organization	23 out of 11937 genes, 0.2%	33 out of 19550 genes, 0.2%	1
regulation of immune effector process	167 out of 11937 genes, 1.4%	262 out of 19550 genes, 1.3%	1
generation of a signal involved in cell-cell signaling	157 out of 11937 genes, 1.3%	246 out of 19550 genes, 1.3%	1
signal release	157 out of 11937 genes, 1.3%	246 out of 19550 genes, 1.3%	1
nucleobase metabolic process	58 out of 11937 genes, 0.5%	88 out of 19550 genes, 0.5%	1
regulation of smooth muscle contraction	21 out of 11937 genes, 0.2%	30 out of 19550 genes, 0.2%	1
regulation of metal ion transport	63 out of 11937 genes, 0.5%	96 out of 19550 genes, 0.5%	1
negative regulation of cytokine production	85 out of 11937 genes, 0.7%	131 out of 19550 genes, 0.7%	1
regulation of DNA binding	68 out of 11937 genes, 0.6%	104 out of 19550 genes, 0.5%	1
positive regulation of macromolecule biosynthetic process	100 out of 11937 genes, 0.8%	155 out of 19550 genes, 0.8%	1
regulation of cellular component biogenesis	105 out of 11937 genes, 0.9%	163 out of 19550 genes, 0.8%	1
response to insulin stimulus	73 out of 11937 genes, 0.6%	112 out of 19550 genes, 0.6%	1
nucleoside monophosphate biosynthetic process	61 out of 11937 genes, 0.5%	93 out of 19550 genes, 0.5%	1
regulation of defense response to virus	49 out of 11937 genes, 0.4%	74 out of 19550 genes, 0.4%	1
cellular process involved in reproduction	138 out of 11937 genes, 1.2%	216 out of 19550 genes, 1.1%	1
nuclear division	93 out of 11937 genes, 0.8%	144 out of 19550 genes, 0.7%	1
mitosis	93 out of 11937 genes, 0.8%	144 out of 19550 genes, 0.7%	1
metencephalon development	42 out of 11937 genes, 0.4%	63 out of 19550 genes, 0.3%	1
mesenchymal cell differentiation	42 out of 11937 genes, 0.4%	63 out of 19550 genes, 0.3%	1
leukocyte activation	290 out of 11937 genes, 2.4%	461 out of 19550 genes, 2.4%	1
pyrimidine ribonucleotide biosynthetic process	17 out of 11937 genes, 0.1%	24 out of 19550 genes, 0.1%	1
positive regulation of alpha-beta T cell activation	17 out of 11937 genes, 0.1%	24 out of 19550 genes, 0.1%	1
regulation of axonogenesis	17 out of 11937 genes, 0.1%	24 out of 19550 genes, 0.1%	1
cardiac muscle cell differentiation	17 out of 11937 genes, 0.1%	24 out of 19550 genes, 0.1%	1
regulation of extent of cell growth	17 out of 11937 genes, 0.1%	24 out of 19550 genes, 0.1%	1
cell fate commitment	96 out of 11937 genes, 0.8%	149 out of 19550 genes, 0.8%	1
positive regulation of leukocyte chemotaxis	26 out of 11937 genes, 0.2%	38 out of 19550 genes, 0.2%	1
biomineral tissue development	26 out of 11937 genes, 0.2%	38 out of 19550 genes, 0.2%	1
response to acid	64 out of 11937 genes, 0.5%	98 out of 19550 genes, 0.5%	1
coenzyme biosynthetic process	40 out of 11937 genes, 0.3%	60 out of 19550 genes, 0.3%	1
ncRNA processing	40 out of 11937 genes, 0.3%	60 out of 19550 genes, 0.3%	1
positive regulation of behavior	40 out of 11937 genes, 0.3%	60 out of 19550 genes, 0.3%	1
positive regulation of chemotaxis	40 out of 11937 genes, 0.3%	60 out of 19550 genes, 0.3%	1
regulation of response to biotic stimulus	52 out of 11937 genes, 0.4%	79 out of 19550 genes, 0.4%	1
insulin secretion	52 out of 11937 genes, 0.4%	79 out of 19550 genes, 0.4%	1
regulation of mitotic recombination	3 out of 11937 genes, 0.0%	3 out of 19550 genes, 0.0%	1
assembly of actomyosin apparatus involved in cell cycle cytokinesis	3 out of 11937 genes, 0.0%	3 out of 19550 genes, 0.0%	1
membrane raft assembly	3 out of 11937 genes, 0.0%	3 out of 19550 genes, 0.0%	1
type IV hypersensitivity	3 out of 11937 genes, 0.0%	3 out of 19550 genes, 0.0%	1
positive regulation of T cell mediated cytotoxicity	3 out of 11937 genes, 0.0%	3 out of 19550 genes, 0.0%	1
regulation of systemic arterial blood pressure by chemoreceptor signaling	3 out of 11937 genes, 0.0%	3 out of 19550 genes, 0.0%	1
detection of hypoxic conditions in blood by chemoreceptor signaling	3 out of 11937 genes, 0.0%	3 out of 19550 genes, 0.0%	1
pre-B cell differentiation	3 out of 11937 genes, 0.0%	3 out of 19550 genes, 0.0%	1
negative regulation of leukocyte migration	3 out of 11937 genes, 0.0%	3 out of 19550 genes, 0.0%	1
positive regulation of T cell mediated immunity	3 out of 11937 genes, 0.0%	3 out of 19550 genes, 0.0%	1
cytoplasmic pattern recognition receptor signaling pathway	3 out of 11937 genes, 0.0%	3 out of 19550 genes, 0.0%	1
aortic valve development	3 out of 11937 genes, 0.0%	3 out of 19550 genes, 0.0%	1
heart valve morphogenesis	3 out of 11937 genes, 0.0%	3 out of 19550 genes, 0.0%	1
endocardial cushion development	3 out of 11937 genes, 0.0%	3 out of 19550 genes, 0.0%	1
endocardial cushion morphogenesis	3 out of 11937 genes, 0.0%	3 out of 19550 genes, 0.0%	1
septum primum development	3 out of 11937 genes, 0.0%	3 out of 19550 genes, 0.0%	1
septum secundum development	3 out of 11937 genes, 0.0%	3 out of 19550 genes, 0.0%	1
type B pancreatic cell development	3 out of 11937 genes, 0.0%	3 out of 19550 genes, 0.0%	1
glycosaminoglycan catabolic process	3 out of 11937 genes, 0.0%	3 out of 19550 genes, 0.0%	1
tRNA splicing, via endonucleolytic cleavage and ligation	3 out of 11937 genes, 0.0%	3 out of 19550 genes, 0.0%	1
N-terminal protein amino acid acetylation	3 out of 11937 genes, 0.0%	3 out of 19550 genes, 0.0%	1
N-terminal protein lipidation	3 out of 11937 genes, 0.0%	3 out of 19550 genes, 0.0%	1
arginine catabolic process	3 out of 11937 genes, 0.0%	3 out of 19550 genes, 0.0%	1
glycine catabolic process	3 out of 11937 genes, 0.0%	3 out of 19550 genes, 0.0%	1
isoleucine metabolic process	3 out of 11937 genes, 0.0%	3 out of 19550 genes, 0.0%	1
regulation of cell shape	3 out of 11937 genes, 0.0%	3 out of 19550 genes, 0.0%	1
purine deoxyribonucleotide biosynthetic process	3 out of 11937 genes, 0.0%	3 out of 19550 genes, 0.0%	1
deoxyribonucleoside triphosphate biosynthetic process	3 out of 11937 genes, 0.0%	3 out of 19550 genes, 0.0%	1
pyrimidine deoxyribonucleoside triphosphate metabolic process	3 out of 11937 genes, 0.0%	3 out of 19550 genes, 0.0%	1
auditory receptor cell fate commitment	3 out of 11937 genes, 0.0%	3 out of 19550 genes, 0.0%	1
specification of organ identity	3 out of 11937 genes, 0.0%	3 out of 19550 genes, 0.0%	1
regulation of hydrogen peroxide metabolic process	3 out of 11937 genes, 0.0%	3 out of 19550 genes, 0.0%	1
developmental programmed cell death	3 out of 11937 genes, 0.0%	3 out of 19550 genes, 0.0%	1
regulation of blood pressure by chemoreceptor signaling pathway	3 out of 11937 genes, 0.0%	3 out of 19550 genes, 0.0%	1
regulation of release of sequestered calcium ion into cytosol by sarcoplasmic reticulum	3 out of 11937 genes, 0.0%	3 out of 19550 genes, 0.0%	1
response to inactivity	3 out of 11937 genes, 0.0%	3 out of 19550 genes, 0.0%	1
regulation of smooth muscle cell migration	3 out of 11937 genes, 0.0%	3 out of 19550 genes, 0.0%	1
purine nucleoside transport	3 out of 11937 genes, 0.0%	3 out of 19550 genes, 0.0%	1
energy coupled proton transport, down electrochemical gradient	3 out of 11937 genes, 0.0%	3 out of 19550 genes, 0.0%	1
ATP synthesis coupled proton transport	3 out of 11937 genes, 0.0%	3 out of 19550 genes, 0.0%	1
detection of bacterium	3 out of 11937 genes, 0.0%	3 out of 19550 genes, 0.0%	1
macroautophagy	3 out of 11937 genes, 0.0%	3 out of 19550 genes, 0.0%	1
antibiotic metabolic process	3 out of 11937 genes, 0.0%	3 out of 19550 genes, 0.0%	1
cytochrome complex assembly	3 out of 11937 genes, 0.0%	3 out of 19550 genes, 0.0%	1
respiratory chain complex III assembly	3 out of 11937 genes, 0.0%	3 out of 19550 genes, 0.0%	1
viral genome replication	3 out of 11937 genes, 0.0%	3 out of 19550 genes, 0.0%	1
aldonic acid metabolic process	3 out of 11937 genes, 0.0%	3 out of 19550 genes, 0.0%	1
nitrogen utilization	3 out of 11937 genes, 0.0%	3 out of 19550 genes, 0.0%	1
epithalamus development	3 out of 11937 genes, 0.0%	3 out of 19550 genes, 0.0%	1
embryonic olfactory bulb interneuron precursor migration	3 out of 11937 genes, 0.0%	3 out of 19550 genes, 0.0%	1
lamellipodium assembly	3 out of 11937 genes, 0.0%	3 out of 19550 genes, 0.0%	1
pancreatic juice secretion	3 out of 11937 genes, 0.0%	3 out of 19550 genes, 0.0%	1
positive regulation of actin filament polymerization	3 out of 11937 genes, 0.0%	3 out of 19550 genes, 0.0%	1
negative regulation of granulocyte differentiation	3 out of 11937 genes, 0.0%	3 out of 19550 genes, 0.0%	1
positive regulation of granulocyte differentiation	3 out of 11937 genes, 0.0%	3 out of 19550 genes, 0.0%	1
positive regulation of sulfur amino acid metabolic process	3 out of 11937 genes, 0.0%	3 out of 19550 genes, 0.0%	1
membrane raft distribution	3 out of 11937 genes, 0.0%	3 out of 19550 genes, 0.0%	1
positive regulation of protein polymerization	3 out of 11937 genes, 0.0%	3 out of 19550 genes, 0.0%	1
intracellular lipid transport	3 out of 11937 genes, 0.0%	3 out of 19550 genes, 0.0%	1
negative regulation of protein oligomerization	3 out of 11937 genes, 0.0%	3 out of 19550 genes, 0.0%	1
regulation of protein phosphatase type 2B activity	3 out of 11937 genes, 0.0%	3 out of 19550 genes, 0.0%	1
low-density lipoprotein receptor particle metabolic process	3 out of 11937 genes, 0.0%	3 out of 19550 genes, 0.0%	1
inositol phosphate biosynthetic process	3 out of 11937 genes, 0.0%	3 out of 19550 genes, 0.0%	1
inositol trisphosphate biosynthetic process	3 out of 11937 genes, 0.0%	3 out of 19550 genes, 0.0%	1
secretion of lysosomal enzymes	3 out of 11937 genes, 0.0%	3 out of 19550 genes, 0.0%	1
nucleoside bisphosphate metabolic process	3 out of 11937 genes, 0.0%	3 out of 19550 genes, 0.0%	1
nucleoside bisphosphate biosynthetic process	3 out of 11937 genes, 0.0%	3 out of 19550 genes, 0.0%	1
ribonucleoside bisphosphate metabolic process	3 out of 11937 genes, 0.0%	3 out of 19550 genes, 0.0%	1
ribonucleoside bisphosphate biosynthetic process	3 out of 11937 genes, 0.0%	3 out of 19550 genes, 0.0%	1
purine nucleoside bisphosphate metabolic process	3 out of 11937 genes, 0.0%	3 out of 19550 genes, 0.0%	1
purine nucleoside bisphosphate biosynthetic process	3 out of 11937 genes, 0.0%	3 out of 19550 genes, 0.0%	1
purine ribonucleoside bisphosphate metabolic process	3 out of 11937 genes, 0.0%	3 out of 19550 genes, 0.0%	1
purine ribonucleoside bisphosphate biosynthetic process	3 out of 11937 genes, 0.0%	3 out of 19550 genes, 0.0%	1
copper ion transmembrane transport	3 out of 11937 genes, 0.0%	3 out of 19550 genes, 0.0%	1
nucleotide-binding domain, leucine rich repeat containing receptor signaling pathway	3 out of 11937 genes, 0.0%	3 out of 19550 genes, 0.0%	1
retrograde transport, endosome to Golgi	3 out of 11937 genes, 0.0%	3 out of 19550 genes, 0.0%	1
regulation of vasodilation	3 out of 11937 genes, 0.0%	3 out of 19550 genes, 0.0%	1
negative regulation of circadian sleep/wake cycle, sleep	3 out of 11937 genes, 0.0%	3 out of 19550 genes, 0.0%	1
detection of bacterial lipoprotein	3 out of 11937 genes, 0.0%	3 out of 19550 genes, 0.0%	1
actin nucleation	3 out of 11937 genes, 0.0%	3 out of 19550 genes, 0.0%	1
homologous chromosome segregation	3 out of 11937 genes, 0.0%	3 out of 19550 genes, 0.0%	1
regulation of auditory receptor cell differentiation	3 out of 11937 genes, 0.0%	3 out of 19550 genes, 0.0%	1
regulation of mechanoreceptor differentiation	3 out of 11937 genes, 0.0%	3 out of 19550 genes, 0.0%	1
positive regulation of neuron differentiation	3 out of 11937 genes, 0.0%	3 out of 19550 genes, 0.0%	1
positive regulation of cellular amino acid metabolic process	3 out of 11937 genes, 0.0%	3 out of 19550 genes, 0.0%	1
positive regulation of striated muscle tissue development	3 out of 11937 genes, 0.0%	3 out of 19550 genes, 0.0%	1
inosine metabolic process	3 out of 11937 genes, 0.0%	3 out of 19550 genes, 0.0%	1
purine deoxyribonucleoside metabolic process	3 out of 11937 genes, 0.0%	3 out of 19550 genes, 0.0%	1
pyrimidine deoxyribonucleoside metabolic process	3 out of 11937 genes, 0.0%	3 out of 19550 genes, 0.0%	1
nicotinamide riboside metabolic process	3 out of 11937 genes, 0.0%	3 out of 19550 genes, 0.0%	1
post-embryonic eye morphogenesis	3 out of 11937 genes, 0.0%	3 out of 19550 genes, 0.0%	1
positive regulation of muscle organ development	3 out of 11937 genes, 0.0%	3 out of 19550 genes, 0.0%	1
chondroitin sulfate proteoglycan biosynthetic process	3 out of 11937 genes, 0.0%	3 out of 19550 genes, 0.0%	1
positive regulation of sulfur metabolic process	3 out of 11937 genes, 0.0%	3 out of 19550 genes, 0.0%	1
regulation of release of sequestered calcium ion into cytosol	3 out of 11937 genes, 0.0%	3 out of 19550 genes, 0.0%	1
membrane raft localization	3 out of 11937 genes, 0.0%	3 out of 19550 genes, 0.0%	1
amino acid uptake involved in synaptic transmission	3 out of 11937 genes, 0.0%	3 out of 19550 genes, 0.0%	1
regulation of amino acid transport	3 out of 11937 genes, 0.0%	3 out of 19550 genes, 0.0%	1
regulation of cardiac muscle contraction	3 out of 11937 genes, 0.0%	3 out of 19550 genes, 0.0%	1
inner ear receptor cell fate commitment	3 out of 11937 genes, 0.0%	3 out of 19550 genes, 0.0%	1
estrous cycle phase	3 out of 11937 genes, 0.0%	3 out of 19550 genes, 0.0%	1
cranial suture morphogenesis	3 out of 11937 genes, 0.0%	3 out of 19550 genes, 0.0%	1
lateral sprouting from an epithelium	3 out of 11937 genes, 0.0%	3 out of 19550 genes, 0.0%	1
regulation of ribonuclease activity	3 out of 11937 genes, 0.0%	3 out of 19550 genes, 0.0%	1
detection of bacterial lipopeptide	3 out of 11937 genes, 0.0%	3 out of 19550 genes, 0.0%	1
nucleotide-binding oligomerization domain containing signaling pathway	3 out of 11937 genes, 0.0%	3 out of 19550 genes, 0.0%	1
regulation of nucleotide-binding oligomerization domain containing signaling pathway	3 out of 11937 genes, 0.0%	3 out of 19550 genes, 0.0%	1
pyridine nucleoside metabolic process	3 out of 11937 genes, 0.0%	3 out of 19550 genes, 0.0%	1
oxidative demethylation	3 out of 11937 genes, 0.0%	3 out of 19550 genes, 0.0%	1
cellular response to biotic stimulus	3 out of 11937 genes, 0.0%	3 out of 19550 genes, 0.0%	1
cellular response to molecule of bacterial origin	3 out of 11937 genes, 0.0%	3 out of 19550 genes, 0.0%	1
cellular response to bacterial lipoprotein	3 out of 11937 genes, 0.0%	3 out of 19550 genes, 0.0%	1
cellular response to bacterial lipopeptide	3 out of 11937 genes, 0.0%	3 out of 19550 genes, 0.0%	1
cellular response to lipid	3 out of 11937 genes, 0.0%	3 out of 19550 genes, 0.0%	1
kidney mesenchyme development	3 out of 11937 genes, 0.0%	3 out of 19550 genes, 0.0%	1
metanephric mesenchyme development	3 out of 11937 genes, 0.0%	3 out of 19550 genes, 0.0%	1
protein localization in membrane	3 out of 11937 genes, 0.0%	3 out of 19550 genes, 0.0%	1
cellular organofluorine metabolic process	3 out of 11937 genes, 0.0%	3 out of 19550 genes, 0.0%	1
craniofacial suture morphogenesis	3 out of 11937 genes, 0.0%	3 out of 19550 genes, 0.0%	1
regulation of inner ear receptor cell differentiation	3 out of 11937 genes, 0.0%	3 out of 19550 genes, 0.0%	1
regulation of axon extension	15 out of 11937 genes, 0.1%	21 out of 19550 genes, 0.1%	1
amine metabolic process	109 out of 11937 genes, 0.9%	170 out of 19550 genes, 0.9%	1
amine transport	62 out of 11937 genes, 0.5%	95 out of 19550 genes, 0.5%	1
T cell selection	24 out of 11937 genes, 0.2%	35 out of 19550 genes, 0.2%	1
respiratory system development	24 out of 11937 genes, 0.2%	35 out of 19550 genes, 0.2%	1
regionalization	183 out of 11937 genes, 1.5%	289 out of 19550 genes, 1.5%	1
regulation of calcium ion transport into cytosol	31 out of 11937 genes, 0.3%	46 out of 19550 genes, 0.2%	1
monoamine transport	31 out of 11937 genes, 0.3%	46 out of 19550 genes, 0.2%	1
response to lithium ion	13 out of 11937 genes, 0.1%	18 out of 19550 genes, 0.1%	1
establishment or maintenance of apical/basal cell polarity	13 out of 11937 genes, 0.1%	18 out of 19550 genes, 0.1%	1
positive regulation of protein import into nucleus	13 out of 11937 genes, 0.1%	18 out of 19550 genes, 0.1%	1
positive regulation of alpha-beta T cell differentiation	13 out of 11937 genes, 0.1%	18 out of 19550 genes, 0.1%	1
trabecula formation	13 out of 11937 genes, 0.1%	18 out of 19550 genes, 0.1%	1
trabecula morphogenesis	13 out of 11937 genes, 0.1%	18 out of 19550 genes, 0.1%	1
positive regulation of intracellular protein transport	13 out of 11937 genes, 0.1%	18 out of 19550 genes, 0.1%	1
response to cytokine stimulus	181 out of 11937 genes, 1.5%	286 out of 19550 genes, 1.5%	1
negative regulation of cell development	43 out of 11937 genes, 0.4%	65 out of 19550 genes, 0.3%	1
response to light stimulus	125 out of 11937 genes, 1.0%	196 out of 19550 genes, 1.0%	1
aerobic respiration	22 out of 11937 genes, 0.2%	32 out of 19550 genes, 0.2%	1
regulation of reproductive process	22 out of 11937 genes, 0.2%	32 out of 19550 genes, 0.2%	1
negative regulation of catabolic process	36 out of 11937 genes, 0.3%	54 out of 19550 genes, 0.3%	1
regulation of organ morphogenesis	36 out of 11937 genes, 0.3%	54 out of 19550 genes, 0.3%	1
branching involved in ureteric bud morphogenesis	11 out of 11937 genes, 0.1%	15 out of 19550 genes, 0.1%	1
dicarboxylic acid transport	11 out of 11937 genes, 0.1%	15 out of 19550 genes, 0.1%	1
regulation of cholesterol efflux	11 out of 11937 genes, 0.1%	15 out of 19550 genes, 0.1%	1
striated muscle hypertrophy	11 out of 11937 genes, 0.1%	15 out of 19550 genes, 0.1%	1
intracellular estrogen receptor signaling pathway	11 out of 11937 genes, 0.1%	15 out of 19550 genes, 0.1%	1
musculoskeletal movement	11 out of 11937 genes, 0.1%	15 out of 19550 genes, 0.1%	1
G2 phase	11 out of 11937 genes, 0.1%	15 out of 19550 genes, 0.1%	1
ureteric bud morphogenesis	11 out of 11937 genes, 0.1%	15 out of 19550 genes, 0.1%	1
regulation of neurological system process	210 out of 11937 genes, 1.8%	333 out of 19550 genes, 1.7%	1
chromatin remodeling	29 out of 11937 genes, 0.2%	43 out of 19550 genes, 0.2%	1
negative regulation of neurogenesis	29 out of 11937 genes, 0.2%	43 out of 19550 genes, 0.2%	1
positive regulation of nitrogen compound metabolic process	95 out of 11937 genes, 0.8%	148 out of 19550 genes, 0.8%	1
negative regulation of cell cycle	108 out of 11937 genes, 0.9%	169 out of 19550 genes, 0.9%	1
peptidyl-arginine N-methylation	9 out of 11937 genes, 0.1%	12 out of 19550 genes, 0.1%	1
peptidyl-arginine omega-N-methylation	9 out of 11937 genes, 0.1%	12 out of 19550 genes, 0.1%	1
macrophage activation	9 out of 11937 genes, 0.1%	12 out of 19550 genes, 0.1%	1
regulation of centrosome cycle	9 out of 11937 genes, 0.1%	12 out of 19550 genes, 0.1%	1
regulation of endopeptidase activity	9 out of 11937 genes, 0.1%	12 out of 19550 genes, 0.1%	1
vitamin metabolic process	63 out of 11937 genes, 0.5%	97 out of 19550 genes, 0.5%	1
sulfur amino acid transport	5 out of 11937 genes, 0.0%	6 out of 19550 genes, 0.0%	1
cytokinetic cell separation	5 out of 11937 genes, 0.0%	6 out of 19550 genes, 0.0%	1
ciliary or flagellar motility	5 out of 11937 genes, 0.0%	6 out of 19550 genes, 0.0%	1
regulation of receptor internalization	5 out of 11937 genes, 0.0%	6 out of 19550 genes, 0.0%	1
B cell activation involved in immune response	5 out of 11937 genes, 0.0%	6 out of 19550 genes, 0.0%	1
skeletal muscle contraction	5 out of 11937 genes, 0.0%	6 out of 19550 genes, 0.0%	1
cardiac atrium development	5 out of 11937 genes, 0.0%	6 out of 19550 genes, 0.0%	1
regulation of transcription from RNA polymerase I promoter	5 out of 11937 genes, 0.0%	6 out of 19550 genes, 0.0%	1
regulation of transcription from RNA polymerase III promoter	5 out of 11937 genes, 0.0%	6 out of 19550 genes, 0.0%	1
transcription from RNA polymerase II promoter	5 out of 11937 genes, 0.0%	6 out of 19550 genes, 0.0%	1
acrosome reaction	5 out of 11937 genes, 0.0%	6 out of 19550 genes, 0.0%	1
histone mRNA metabolic process	5 out of 11937 genes, 0.0%	6 out of 19550 genes, 0.0%	1
regulation of G2/M transition of mitotic cell cycle	5 out of 11937 genes, 0.0%	6 out of 19550 genes, 0.0%	1
positive regulation of muscle cell apoptotic process	5 out of 11937 genes, 0.0%	6 out of 19550 genes, 0.0%	1
branched-chain aliphatic amino acid transport	5 out of 11937 genes, 0.0%	6 out of 19550 genes, 0.0%	1
pyrimidine nucleoside transport	5 out of 11937 genes, 0.0%	6 out of 19550 genes, 0.0%	1
subthalamus development	5 out of 11937 genes, 0.0%	6 out of 19550 genes, 0.0%	1
olfactory bulb development	5 out of 11937 genes, 0.0%	6 out of 19550 genes, 0.0%	1
positive regulation of protein oligomerization	5 out of 11937 genes, 0.0%	6 out of 19550 genes, 0.0%	1
inositol trisphosphate metabolic process	5 out of 11937 genes, 0.0%	6 out of 19550 genes, 0.0%	1
regulation of epidermis development	5 out of 11937 genes, 0.0%	6 out of 19550 genes, 0.0%	1
regulation of receptor-mediated endocytosis	5 out of 11937 genes, 0.0%	6 out of 19550 genes, 0.0%	1
chondroitin sulfate proteoglycan metabolic process	5 out of 11937 genes, 0.0%	6 out of 19550 genes, 0.0%	1
regulation of pigment cell differentiation	5 out of 11937 genes, 0.0%	6 out of 19550 genes, 0.0%	1
mesenchymal-epithelial cell signaling	5 out of 11937 genes, 0.0%	6 out of 19550 genes, 0.0%	1
response to cholesterol	5 out of 11937 genes, 0.0%	6 out of 19550 genes, 0.0%	1
positive regulation of lymphocyte activation	93 out of 11937 genes, 0.8%	145 out of 19550 genes, 0.7%	1
RNA catabolic process	88 out of 11937 genes, 0.7%	137 out of 19550 genes, 0.7%	1
regulation of actin filament bundle assembly	34 out of 11937 genes, 0.3%	51 out of 19550 genes, 0.3%	1
ethanol metabolic process	7 out of 11937 genes, 0.1%	9 out of 19550 genes, 0.0%	1
regulation of sister chromatid cohesion	7 out of 11937 genes, 0.1%	9 out of 19550 genes, 0.0%	1
nucleoside diphosphate biosynthetic process	7 out of 11937 genes, 0.1%	9 out of 19550 genes, 0.0%	1
nucleotide-sugar metabolic process	7 out of 11937 genes, 0.1%	9 out of 19550 genes, 0.0%	1
regulation of triglyceride catabolic process	7 out of 11937 genes, 0.1%	9 out of 19550 genes, 0.0%	1
basic amino acid transport	7 out of 11937 genes, 0.1%	9 out of 19550 genes, 0.0%	1
response to hydroperoxide	7 out of 11937 genes, 0.1%	9 out of 19550 genes, 0.0%	1
primary alcohol metabolic process	7 out of 11937 genes, 0.1%	9 out of 19550 genes, 0.0%	1
regulation of developmental pigmentation	7 out of 11937 genes, 0.1%	9 out of 19550 genes, 0.0%	1
protein tetramerization	7 out of 11937 genes, 0.1%	9 out of 19550 genes, 0.0%	1
regulation of chromosome segregation	7 out of 11937 genes, 0.1%	9 out of 19550 genes, 0.0%	1
fat-soluble vitamin metabolic process	27 out of 11937 genes, 0.2%	40 out of 19550 genes, 0.2%	1
cell cycle checkpoint	56 out of 11937 genes, 0.5%	86 out of 19550 genes, 0.4%	1
regulation of cell cycle arrest	56 out of 11937 genes, 0.5%	86 out of 19550 genes, 0.4%	1
dicarboxylic acid metabolic process	39 out of 11937 genes, 0.3%	59 out of 19550 genes, 0.3%	1
nuclear-transcribed mRNA catabolic process	81 out of 11937 genes, 0.7%	126 out of 19550 genes, 0.6%	1
epithelial to mesenchymal transition	32 out of 11937 genes, 0.3%	48 out of 19550 genes, 0.2%	1
lymphocyte activation	254 out of 11937 genes, 2.1%	405 out of 19550 genes, 2.1%	1
drug transport	25 out of 11937 genes, 0.2%	37 out of 19550 genes, 0.2%	1
ameboidal cell migration	59 out of 11937 genes, 0.5%	91 out of 19550 genes, 0.5%	1
transforming growth factor beta receptor signaling pathway	59 out of 11937 genes, 0.5%	91 out of 19550 genes, 0.5%	1
heart morphogenesis	84 out of 11937 genes, 0.7%	131 out of 19550 genes, 0.7%	1
T cell mediated immunity	16 out of 11937 genes, 0.1%	23 out of 19550 genes, 0.1%	1
plasma membrane organization	16 out of 11937 genes, 0.1%	23 out of 19550 genes, 0.1%	1
phospholipase C-activating G-protein coupled receptor signaling pathway	16 out of 11937 genes, 0.1%	23 out of 19550 genes, 0.1%	1
regulation of B cell differentiation	16 out of 11937 genes, 0.1%	23 out of 19550 genes, 0.1%	1
negative regulation of glial cell differentiation	16 out of 11937 genes, 0.1%	23 out of 19550 genes, 0.1%	1
bone development	16 out of 11937 genes, 0.1%	23 out of 19550 genes, 0.1%	1
establishment or maintenance of bipolar cell polarity	16 out of 11937 genes, 0.1%	23 out of 19550 genes, 0.1%	1
spliceosomal complex assembly	30 out of 11937 genes, 0.3%	45 out of 19550 genes, 0.2%	1
positive regulation of leukocyte migration	30 out of 11937 genes, 0.3%	45 out of 19550 genes, 0.2%	1
cellular response to oxidative stress	30 out of 11937 genes, 0.3%	45 out of 19550 genes, 0.2%	1
modification-dependent protein catabolic process	237 out of 11937 genes, 2.0%	378 out of 19550 genes, 1.9%	1
modification-dependent macromolecule catabolic process	237 out of 11937 genes, 2.0%	378 out of 19550 genes, 1.9%	1
receptor-mediated endocytosis	23 out of 11937 genes, 0.2%	34 out of 19550 genes, 0.2%	1
gene silencing	62 out of 11937 genes, 0.5%	96 out of 19550 genes, 0.5%	1
regulation of cellular response to stress	35 out of 11937 genes, 0.3%	53 out of 19550 genes, 0.3%	1
positive regulation of leukocyte activation	113 out of 11937 genes, 0.9%	178 out of 19550 genes, 0.9%	1
positive regulation of cell activation	113 out of 11937 genes, 0.9%	178 out of 19550 genes, 0.9%	1
regulation of locomotion	85 out of 11937 genes, 0.7%	133 out of 19550 genes, 0.7%	1
cell recognition	45 out of 11937 genes, 0.4%	69 out of 19550 genes, 0.4%	1
vesicle fusion	14 out of 11937 genes, 0.1%	20 out of 19550 genes, 0.1%	1
isoprenoid biosynthetic process	14 out of 11937 genes, 0.1%	20 out of 19550 genes, 0.1%	1
developmental maturation	75 out of 11937 genes, 0.6%	117 out of 19550 genes, 0.6%	1
regulation of response to external stimulus	103 out of 11937 genes, 0.9%	162 out of 19550 genes, 0.8%	1
leukocyte mediated cytotoxicity	21 out of 11937 genes, 0.2%	31 out of 19550 genes, 0.2%	1
positive regulation of T cell proliferation	21 out of 11937 genes, 0.2%	31 out of 19550 genes, 0.2%	1
positive regulation of lymphocyte proliferation	21 out of 11937 genes, 0.2%	31 out of 19550 genes, 0.2%	1
hormone transport	111 out of 11937 genes, 0.9%	175 out of 19550 genes, 0.9%	1
lymphocyte mediated immunity	83 out of 11937 genes, 0.7%	130 out of 19550 genes, 0.7%	1
mesenchymal cell development	38 out of 11937 genes, 0.3%	58 out of 19550 genes, 0.3%	1
cell morphogenesis involved in differentiation	239 out of 11937 genes, 2.0%	382 out of 19550 genes, 2.0%	1
morphogenesis of a branching structure	101 out of 11937 genes, 0.8%	159 out of 19550 genes, 0.8%	1
protein modification by small protein removal	48 out of 11937 genes, 0.4%	74 out of 19550 genes, 0.4%	1
sister chromatid segregation	26 out of 11937 genes, 0.2%	39 out of 19550 genes, 0.2%	1
positive regulation of leukocyte proliferation	26 out of 11937 genes, 0.2%	39 out of 19550 genes, 0.2%	1
positive regulation of nucleobase-containing compound metabolic process	91 out of 11937 genes, 0.8%	143 out of 19550 genes, 0.7%	1
myeloid dendritic cell activation	12 out of 11937 genes, 0.1%	17 out of 19550 genes, 0.1%	1
cerebellum development	12 out of 11937 genes, 0.1%	17 out of 19550 genes, 0.1%	1
fat-soluble vitamin biosynthetic process	12 out of 11937 genes, 0.1%	17 out of 19550 genes, 0.1%	1
regulation of vascular permeability	12 out of 11937 genes, 0.1%	17 out of 19550 genes, 0.1%	1
pigment cell differentiation	12 out of 11937 genes, 0.1%	17 out of 19550 genes, 0.1%	1
positive regulation of biosynthetic process	161 out of 11937 genes, 1.3%	256 out of 19550 genes, 1.3%	1
mRNA catabolic process	81 out of 11937 genes, 0.7%	127 out of 19550 genes, 0.6%	1
blood coagulation	19 out of 11937 genes, 0.2%	28 out of 19550 genes, 0.1%	1
organic alcohol transport	31 out of 11937 genes, 0.3%	47 out of 19550 genes, 0.2%	1
cholesterol metabolic process	41 out of 11937 genes, 0.3%	63 out of 19550 genes, 0.3%	1
regulation of epithelial cell differentiation	24 out of 11937 genes, 0.2%	36 out of 19550 genes, 0.2%	1
somitogenesis	10 out of 11937 genes, 0.1%	14 out of 19550 genes, 0.1%	1
pons development	10 out of 11937 genes, 0.1%	14 out of 19550 genes, 0.1%	1
myofibril assembly	10 out of 11937 genes, 0.1%	14 out of 19550 genes, 0.1%	1
muscle cell proliferation	10 out of 11937 genes, 0.1%	14 out of 19550 genes, 0.1%	1
platelet activating factor metabolic process	10 out of 11937 genes, 0.1%	14 out of 19550 genes, 0.1%	1
cofactor transport	10 out of 11937 genes, 0.1%	14 out of 19550 genes, 0.1%	1
response to calcium ion	10 out of 11937 genes, 0.1%	14 out of 19550 genes, 0.1%	1
somite development	10 out of 11937 genes, 0.1%	14 out of 19550 genes, 0.1%	1
regulation of actin filament-based process	92 out of 11937 genes, 0.8%	145 out of 19550 genes, 0.7%	1
cell aging	29 out of 11937 genes, 0.2%	44 out of 19550 genes, 0.2%	1
cytokinesis	17 out of 11937 genes, 0.1%	25 out of 19550 genes, 0.1%	1
pyruvate metabolic process	17 out of 11937 genes, 0.1%	25 out of 19550 genes, 0.1%	1
mRNA export from nucleus	17 out of 11937 genes, 0.1%	25 out of 19550 genes, 0.1%	1
cellular response to starvation	17 out of 11937 genes, 0.1%	25 out of 19550 genes, 0.1%	1
response to starvation	17 out of 11937 genes, 0.1%	25 out of 19550 genes, 0.1%	1
positive regulation of lipid biosynthetic process	17 out of 11937 genes, 0.1%	25 out of 19550 genes, 0.1%	1
mRNA transport	17 out of 11937 genes, 0.1%	25 out of 19550 genes, 0.1%	1
stem cell maintenance	34 out of 11937 genes, 0.3%	52 out of 19550 genes, 0.3%	1
stem cell development	34 out of 11937 genes, 0.3%	52 out of 19550 genes, 0.3%	1
regulation of cell-substrate adhesion	54 out of 11937 genes, 0.5%	84 out of 19550 genes, 0.4%	1
regulation of systemic arterial blood pressure	49 out of 11937 genes, 0.4%	76 out of 19550 genes, 0.4%	1
macromolecular complex disassembly	39 out of 11937 genes, 0.3%	60 out of 19550 genes, 0.3%	1
nucleoside diphosphate metabolic process	22 out of 11937 genes, 0.2%	33 out of 19550 genes, 0.2%	1
demethylation	22 out of 11937 genes, 0.2%	33 out of 19550 genes, 0.2%	1
regulation of cytokine production	240 out of 11937 genes, 2.0%	385 out of 19550 genes, 2.0%	1
catabolic process	1018 out of 11937 genes, 8.5%	1652 out of 19550 genes, 8.5%	1
non-recombinational repair	8 out of 11937 genes, 0.1%	11 out of 19550 genes, 0.1%	1
germinal center formation	8 out of 11937 genes, 0.1%	11 out of 19550 genes, 0.1%	1
Notch signaling pathway	8 out of 11937 genes, 0.1%	11 out of 19550 genes, 0.1%	1
regulation of plasma membrane long-chain fatty acid transport	8 out of 11937 genes, 0.1%	11 out of 19550 genes, 0.1%	1
cilium assembly	8 out of 11937 genes, 0.1%	11 out of 19550 genes, 0.1%	1
nucleobase biosynthetic process	8 out of 11937 genes, 0.1%	11 out of 19550 genes, 0.1%	1
pyrimidine ribonucleoside metabolic process	8 out of 11937 genes, 0.1%	11 out of 19550 genes, 0.1%	1
alcohol biosynthetic process	8 out of 11937 genes, 0.1%	11 out of 19550 genes, 0.1%	1
negative regulation of defense response to virus	8 out of 11937 genes, 0.1%	11 out of 19550 genes, 0.1%	1
cilium morphogenesis	8 out of 11937 genes, 0.1%	11 out of 19550 genes, 0.1%	1
ER-nucleus signaling pathway	27 out of 11937 genes, 0.2%	41 out of 19550 genes, 0.2%	1
DNA modification	47 out of 11937 genes, 0.4%	73 out of 19550 genes, 0.4%	1
meiosis I	47 out of 11937 genes, 0.4%	73 out of 19550 genes, 0.4%	1
response to protozoan	15 out of 11937 genes, 0.1%	22 out of 19550 genes, 0.1%	1
ATP biosynthetic process	15 out of 11937 genes, 0.1%	22 out of 19550 genes, 0.1%	1
cellular aromatic compound metabolic process	164 out of 11937 genes, 1.4%	262 out of 19550 genes, 1.3%	1
positive regulation of catabolic process	55 out of 11937 genes, 0.5%	86 out of 19550 genes, 0.4%	1
embryonic pattern specification	20 out of 11937 genes, 0.2%	30 out of 19550 genes, 0.2%	1
RNA 3'-end processing	20 out of 11937 genes, 0.2%	30 out of 19550 genes, 0.2%	1
positive regulation of lipid metabolic process	20 out of 11937 genes, 0.2%	30 out of 19550 genes, 0.2%	1
tissue migration	20 out of 11937 genes, 0.2%	30 out of 19550 genes, 0.2%	1
cellular lipid catabolic process	50 out of 11937 genes, 0.4%	78 out of 19550 genes, 0.4%	1
positive regulation of cell proliferation	162 out of 11937 genes, 1.4%	259 out of 19550 genes, 1.3%	1
neuron-neuron synaptic transmission	40 out of 11937 genes, 0.3%	62 out of 19550 genes, 0.3%	1
type B pancreatic cell differentiation	6 out of 11937 genes, 0.1%	8 out of 19550 genes, 0.0%	1
transcription from RNA polymerase III promoter	6 out of 11937 genes, 0.1%	8 out of 19550 genes, 0.0%	1
nuclear envelope organization	6 out of 11937 genes, 0.1%	8 out of 19550 genes, 0.0%	1
sister chromatid cohesion	6 out of 11937 genes, 0.1%	8 out of 19550 genes, 0.0%	1
negative regulation of muscle cell apoptotic process	6 out of 11937 genes, 0.1%	8 out of 19550 genes, 0.0%	1
negative regulation of lipid storage	6 out of 11937 genes, 0.1%	8 out of 19550 genes, 0.0%	1
negative regulation of translation	6 out of 11937 genes, 0.1%	8 out of 19550 genes, 0.0%	1
aromatic compound biosynthetic process	6 out of 11937 genes, 0.1%	8 out of 19550 genes, 0.0%	1
hemoglobin metabolic process	6 out of 11937 genes, 0.1%	8 out of 19550 genes, 0.0%	1
negative regulation of translation in response to stress	6 out of 11937 genes, 0.1%	8 out of 19550 genes, 0.0%	1
regulation of phospholipase A2 activity	6 out of 11937 genes, 0.1%	8 out of 19550 genes, 0.0%	1
positive regulation of phospholipase A2 activity	6 out of 11937 genes, 0.1%	8 out of 19550 genes, 0.0%	1
response to peptidoglycan	6 out of 11937 genes, 0.1%	8 out of 19550 genes, 0.0%	1
interleukin-2 production	6 out of 11937 genes, 0.1%	8 out of 19550 genes, 0.0%	1
response to fluid shear stress	6 out of 11937 genes, 0.1%	8 out of 19550 genes, 0.0%	1
regulation of dopamine metabolic process	6 out of 11937 genes, 0.1%	8 out of 19550 genes, 0.0%	1
pteridine-containing compound biosynthetic process	6 out of 11937 genes, 0.1%	8 out of 19550 genes, 0.0%	1
regulation of translation in response to stress	6 out of 11937 genes, 0.1%	8 out of 19550 genes, 0.0%	1
neuronal ion channel clustering	6 out of 11937 genes, 0.1%	8 out of 19550 genes, 0.0%	1
organ formation	6 out of 11937 genes, 0.1%	8 out of 19550 genes, 0.0%	1
negative regulation of muscle cell differentiation	6 out of 11937 genes, 0.1%	8 out of 19550 genes, 0.0%	1
calcium ion transmembrane transport	6 out of 11937 genes, 0.1%	8 out of 19550 genes, 0.0%	1
epidermal growth factor receptor signaling pathway	30 out of 11937 genes, 0.3%	46 out of 19550 genes, 0.2%	1
ERBB signaling pathway	30 out of 11937 genes, 0.3%	46 out of 19550 genes, 0.2%	1
glucose catabolic process	63 out of 11937 genes, 0.5%	99 out of 19550 genes, 0.5%	1
glial cell differentiation	63 out of 11937 genes, 0.5%	99 out of 19550 genes, 0.5%	1
response to chemical stimulus	1922 out of 11937 genes, 16.1%	3130 out of 19550 genes, 16.0%	1
negative regulation of cell proliferation	102 out of 11937 genes, 0.9%	162 out of 19550 genes, 0.8%	1
axon cargo transport	13 out of 11937 genes, 0.1%	19 out of 19550 genes, 0.1%	1
negative regulation of locomotion	13 out of 11937 genes, 0.1%	19 out of 19550 genes, 0.1%	1
pigment metabolic process	13 out of 11937 genes, 0.1%	19 out of 19550 genes, 0.1%	1
positive regulation of cell adhesion	13 out of 11937 genes, 0.1%	19 out of 19550 genes, 0.1%	1
developmental pigmentation	13 out of 11937 genes, 0.1%	19 out of 19550 genes, 0.1%	1
ear morphogenesis	71 out of 11937 genes, 0.6%	112 out of 19550 genes, 0.6%	1
ossification	113 out of 11937 genes, 0.9%	180 out of 19550 genes, 0.9%	1
anion transport	142 out of 11937 genes, 1.2%	227 out of 19550 genes, 1.2%	1
epithelial cell migration	18 out of 11937 genes, 0.2%	27 out of 19550 genes, 0.1%	1
pteridine-containing compound metabolic process	18 out of 11937 genes, 0.2%	27 out of 19550 genes, 0.1%	1
sulfur compound biosynthetic process	18 out of 11937 genes, 0.2%	27 out of 19550 genes, 0.1%	1
development of primary male sexual characteristics	18 out of 11937 genes, 0.2%	27 out of 19550 genes, 0.1%	1
male sex differentiation	18 out of 11937 genes, 0.2%	27 out of 19550 genes, 0.1%	1
epithelium migration	18 out of 11937 genes, 0.2%	27 out of 19550 genes, 0.1%	1
response to amine stimulus	38 out of 11937 genes, 0.3%	59 out of 19550 genes, 0.3%	1
regulation of transmission of nerve impulse	190 out of 11937 genes, 1.6%	305 out of 19550 genes, 1.6%	1
regulation of glial cell differentiation	33 out of 11937 genes, 0.3%	51 out of 19550 genes, 0.3%	1
icosanoid metabolic process	56 out of 11937 genes, 0.5%	88 out of 19550 genes, 0.5%	1
cell killing	23 out of 11937 genes, 0.2%	35 out of 19550 genes, 0.2%	1
pyrimidine nucleotide biosynthetic process	23 out of 11937 genes, 0.2%	35 out of 19550 genes, 0.2%	1
regulation of production of molecular mediator of immune response	28 out of 11937 genes, 0.2%	43 out of 19550 genes, 0.2%	1
amino sugar metabolic process	28 out of 11937 genes, 0.2%	43 out of 19550 genes, 0.2%	1
maturation of LSU-rRNA	4 out of 11937 genes, 0.0%	5 out of 19550 genes, 0.0%	1
neurotransmitter uptake	4 out of 11937 genes, 0.0%	5 out of 19550 genes, 0.0%	1
negative regulation of production of molecular mediator of immune response	4 out of 11937 genes, 0.0%	5 out of 19550 genes, 0.0%	1
negative regulation of cytokine production involved in immune response	4 out of 11937 genes, 0.0%	5 out of 19550 genes, 0.0%	1
disaccharide metabolic process	4 out of 11937 genes, 0.0%	5 out of 19550 genes, 0.0%	1
pyrimidine nucleotide catabolic process	4 out of 11937 genes, 0.0%	5 out of 19550 genes, 0.0%	1
protein targeting to mitochondrion	4 out of 11937 genes, 0.0%	5 out of 19550 genes, 0.0%	1
mineralocorticoid biosynthetic process	4 out of 11937 genes, 0.0%	5 out of 19550 genes, 0.0%	1
response to unfolded protein	4 out of 11937 genes, 0.0%	5 out of 19550 genes, 0.0%	1
regulation of exit from mitosis	4 out of 11937 genes, 0.0%	5 out of 19550 genes, 0.0%	1
mineralocorticoid metabolic process	4 out of 11937 genes, 0.0%	5 out of 19550 genes, 0.0%	1
10-formyltetrahydrofolate metabolic process	4 out of 11937 genes, 0.0%	5 out of 19550 genes, 0.0%	1
deoxyribonucleotide catabolic process	4 out of 11937 genes, 0.0%	5 out of 19550 genes, 0.0%	1
regulation of autophagy	4 out of 11937 genes, 0.0%	5 out of 19550 genes, 0.0%	1
regulation of centrosome duplication	4 out of 11937 genes, 0.0%	5 out of 19550 genes, 0.0%	1
positive regulation of necrotic cell death	4 out of 11937 genes, 0.0%	5 out of 19550 genes, 0.0%	1
regulation of muscle hypertrophy	4 out of 11937 genes, 0.0%	5 out of 19550 genes, 0.0%	1
ribose phosphate metabolic process	4 out of 11937 genes, 0.0%	5 out of 19550 genes, 0.0%	1
forebrain ventricular zone progenitor cell division	4 out of 11937 genes, 0.0%	5 out of 19550 genes, 0.0%	1
olfactory bulb interneuron differentiation	4 out of 11937 genes, 0.0%	5 out of 19550 genes, 0.0%	1
dormancy process	4 out of 11937 genes, 0.0%	5 out of 19550 genes, 0.0%	1
negative regulation of protein ubiquitination	4 out of 11937 genes, 0.0%	5 out of 19550 genes, 0.0%	1
regulation of nucleobase-containing compound transport	4 out of 11937 genes, 0.0%	5 out of 19550 genes, 0.0%	1
negative regulation of RNA splicing	4 out of 11937 genes, 0.0%	5 out of 19550 genes, 0.0%	1
positive regulation of cellular amine metabolic process	4 out of 11937 genes, 0.0%	5 out of 19550 genes, 0.0%	1
response to topologically incorrect protein	4 out of 11937 genes, 0.0%	5 out of 19550 genes, 0.0%	1
ribosomal large subunit biogenesis	4 out of 11937 genes, 0.0%	5 out of 19550 genes, 0.0%	1
tyrosine phosphorylation of Stat4 protein	4 out of 11937 genes, 0.0%	5 out of 19550 genes, 0.0%	1
intermediate filament organization	4 out of 11937 genes, 0.0%	5 out of 19550 genes, 0.0%	1
regulation of embryonic development	4 out of 11937 genes, 0.0%	5 out of 19550 genes, 0.0%	1
ribose phosphate biosynthetic process	4 out of 11937 genes, 0.0%	5 out of 19550 genes, 0.0%	1
tetrahydrofolate metabolic process	4 out of 11937 genes, 0.0%	5 out of 19550 genes, 0.0%	1
post-embryonic organ morphogenesis	4 out of 11937 genes, 0.0%	5 out of 19550 genes, 0.0%	1
post-embryonic organ development	4 out of 11937 genes, 0.0%	5 out of 19550 genes, 0.0%	1
regulation of collateral sprouting	4 out of 11937 genes, 0.0%	5 out of 19550 genes, 0.0%	1
negative regulation of chemotaxis	4 out of 11937 genes, 0.0%	5 out of 19550 genes, 0.0%	1
response to electrical stimulus	4 out of 11937 genes, 0.0%	5 out of 19550 genes, 0.0%	1
regulation of necroptosis	4 out of 11937 genes, 0.0%	5 out of 19550 genes, 0.0%	1
positive regulation of necroptosis	4 out of 11937 genes, 0.0%	5 out of 19550 genes, 0.0%	1
induction of necroptosis	4 out of 11937 genes, 0.0%	5 out of 19550 genes, 0.0%	1
protein localization in mitochondrion	4 out of 11937 genes, 0.0%	5 out of 19550 genes, 0.0%	1
protein-DNA complex subunit organization	4 out of 11937 genes, 0.0%	5 out of 19550 genes, 0.0%	1
establishment of protein localization in mitochondrion	4 out of 11937 genes, 0.0%	5 out of 19550 genes, 0.0%	1
DNA alkylation	41 out of 11937 genes, 0.3%	64 out of 19550 genes, 0.3%	1
ureteric bud development	11 out of 11937 genes, 0.1%	16 out of 19550 genes, 0.1%	1
cardiac septum development	11 out of 11937 genes, 0.1%	16 out of 19550 genes, 0.1%	1
epithelial cell morphogenesis	11 out of 11937 genes, 0.1%	16 out of 19550 genes, 0.1%	1
acetyl-CoA biosynthetic process	11 out of 11937 genes, 0.1%	16 out of 19550 genes, 0.1%	1
acetyl-CoA biosynthetic process from pyruvate	11 out of 11937 genes, 0.1%	16 out of 19550 genes, 0.1%	1
negative regulation of cell migration	11 out of 11937 genes, 0.1%	16 out of 19550 genes, 0.1%	1
vitamin A biosynthetic process	11 out of 11937 genes, 0.1%	16 out of 19550 genes, 0.1%	1
cellular biogenic amine biosynthetic process	11 out of 11937 genes, 0.1%	16 out of 19550 genes, 0.1%	1
negative regulation of cellular component movement	11 out of 11937 genes, 0.1%	16 out of 19550 genes, 0.1%	1
negative regulation of cell motility	11 out of 11937 genes, 0.1%	16 out of 19550 genes, 0.1%	1
cellular macromolecular complex disassembly	36 out of 11937 genes, 0.3%	56 out of 19550 genes, 0.3%	1
regulation of calcium ion transport	36 out of 11937 genes, 0.3%	56 out of 19550 genes, 0.3%	1
telencephalon development	117 out of 11937 genes, 1.0%	187 out of 19550 genes, 1.0%	1
carboxylic acid catabolic process	75 out of 11937 genes, 0.6%	119 out of 19550 genes, 0.6%	1
lung development	16 out of 11937 genes, 0.1%	24 out of 19550 genes, 0.1%	1
response to interferon-gamma	16 out of 11937 genes, 0.1%	24 out of 19550 genes, 0.1%	1
development of primary female sexual characteristics	16 out of 11937 genes, 0.1%	24 out of 19550 genes, 0.1%	1
female sex differentiation	16 out of 11937 genes, 0.1%	24 out of 19550 genes, 0.1%	1
multicellular organismal response to stress	21 out of 11937 genes, 0.2%	32 out of 19550 genes, 0.2%	1
multicellular organismal homeostasis	91 out of 11937 genes, 0.8%	145 out of 19550 genes, 0.7%	1
urogenital system development	70 out of 11937 genes, 0.6%	111 out of 19550 genes, 0.6%	1
citrulline metabolic process	2 out of 11937 genes, 0.0%	2 out of 19550 genes, 0.0%	1
carbon catabolite regulation of transcription from RNA polymerase II promoter	2 out of 11937 genes, 0.0%	2 out of 19550 genes, 0.0%	1
regulation of transcription from RNA polymerase II promoter by glucose	2 out of 11937 genes, 0.0%	2 out of 19550 genes, 0.0%	1
luteinization	2 out of 11937 genes, 0.0%	2 out of 19550 genes, 0.0%	1
trophectodermal cell differentiation	2 out of 11937 genes, 0.0%	2 out of 19550 genes, 0.0%	1
complement activation, lectin pathway	2 out of 11937 genes, 0.0%	2 out of 19550 genes, 0.0%	1
brain renin-angiotensin system	2 out of 11937 genes, 0.0%	2 out of 19550 genes, 0.0%	1
osteoclast proliferation	2 out of 11937 genes, 0.0%	2 out of 19550 genes, 0.0%	1
natural killer cell activation involved in immune response	2 out of 11937 genes, 0.0%	2 out of 19550 genes, 0.0%	1
B cell selection	2 out of 11937 genes, 0.0%	2 out of 19550 genes, 0.0%	1
mucosal immune response	2 out of 11937 genes, 0.0%	2 out of 19550 genes, 0.0%	1
T cell mediated immune response to tumor cell	2 out of 11937 genes, 0.0%	2 out of 19550 genes, 0.0%	1
tolerance induction to self antigen	2 out of 11937 genes, 0.0%	2 out of 19550 genes, 0.0%	1
regulation of granuloma formation	2 out of 11937 genes, 0.0%	2 out of 19550 genes, 0.0%	1
regulation of chronic inflammatory response	2 out of 11937 genes, 0.0%	2 out of 19550 genes, 0.0%	1
negative regulation of leukocyte chemotaxis	2 out of 11937 genes, 0.0%	2 out of 19550 genes, 0.0%	1
regulation of myeloid leukocyte mediated immunity	2 out of 11937 genes, 0.0%	2 out of 19550 genes, 0.0%	1
regulation of humoral immune response	2 out of 11937 genes, 0.0%	2 out of 19550 genes, 0.0%	1
voluntary skeletal muscle contraction	2 out of 11937 genes, 0.0%	2 out of 19550 genes, 0.0%	1
atrioventricular valve development	2 out of 11937 genes, 0.0%	2 out of 19550 genes, 0.0%	1
mitral valve development	2 out of 11937 genes, 0.0%	2 out of 19550 genes, 0.0%	1
heart valve formation	2 out of 11937 genes, 0.0%	2 out of 19550 genes, 0.0%	1
ventricular cardiac muscle tissue development	2 out of 11937 genes, 0.0%	2 out of 19550 genes, 0.0%	1
endocardial cushion formation	2 out of 11937 genes, 0.0%	2 out of 19550 genes, 0.0%	1
lactose metabolic process	2 out of 11937 genes, 0.0%	2 out of 19550 genes, 0.0%	1
UDP-glucose metabolic process	2 out of 11937 genes, 0.0%	2 out of 19550 genes, 0.0%	1
mannosamine metabolic process	2 out of 11937 genes, 0.0%	2 out of 19550 genes, 0.0%	1
transcription from RNA polymerase I promoter	2 out of 11937 genes, 0.0%	2 out of 19550 genes, 0.0%	1
dolichol-linked oligosaccharide biosynthetic process	2 out of 11937 genes, 0.0%	2 out of 19550 genes, 0.0%	1
protein export from nucleus	2 out of 11937 genes, 0.0%	2 out of 19550 genes, 0.0%	1
glucosylceramide metabolic process	2 out of 11937 genes, 0.0%	2 out of 19550 genes, 0.0%	1
heme biosynthetic process	2 out of 11937 genes, 0.0%	2 out of 19550 genes, 0.0%	1
nuclear pore organization	2 out of 11937 genes, 0.0%	2 out of 19550 genes, 0.0%	1
mitotic metaphase plate congression	2 out of 11937 genes, 0.0%	2 out of 19550 genes, 0.0%	1
meiosis II	2 out of 11937 genes, 0.0%	2 out of 19550 genes, 0.0%	1
nitric oxide mediated signal transduction	2 out of 11937 genes, 0.0%	2 out of 19550 genes, 0.0%	1
mechanosensory behavior	2 out of 11937 genes, 0.0%	2 out of 19550 genes, 0.0%	1
mitochondrial fusion	2 out of 11937 genes, 0.0%	2 out of 19550 genes, 0.0%	1
guanosine metabolic process	2 out of 11937 genes, 0.0%	2 out of 19550 genes, 0.0%	1
dosage compensation by inactivation of X chromosome	2 out of 11937 genes, 0.0%	2 out of 19550 genes, 0.0%	1
pyrimidine nucleoside triphosphate catabolic process	2 out of 11937 genes, 0.0%	2 out of 19550 genes, 0.0%	1
purine deoxyribonucleotide catabolic process	2 out of 11937 genes, 0.0%	2 out of 19550 genes, 0.0%	1
ribonucleoside diphosphate catabolic process	2 out of 11937 genes, 0.0%	2 out of 19550 genes, 0.0%	1
pyrimidine deoxyribonucleoside triphosphate catabolic process	2 out of 11937 genes, 0.0%	2 out of 19550 genes, 0.0%	1
purine deoxyribonucleoside triphosphate biosynthetic process	2 out of 11937 genes, 0.0%	2 out of 19550 genes, 0.0%	1
purine deoxyribonucleoside triphosphate catabolic process	2 out of 11937 genes, 0.0%	2 out of 19550 genes, 0.0%	1
siderophore metabolic process	2 out of 11937 genes, 0.0%	2 out of 19550 genes, 0.0%	1
mRNA transcription	2 out of 11937 genes, 0.0%	2 out of 19550 genes, 0.0%	1
NAD biosynthetic process	2 out of 11937 genes, 0.0%	2 out of 19550 genes, 0.0%	1
carnitine metabolic process	2 out of 11937 genes, 0.0%	2 out of 19550 genes, 0.0%	1
regulation of amino acid import	2 out of 11937 genes, 0.0%	2 out of 19550 genes, 0.0%	1
regulation of high-density lipoprotein particle clearance	2 out of 11937 genes, 0.0%	2 out of 19550 genes, 0.0%	1
twitch skeletal muscle contraction	2 out of 11937 genes, 0.0%	2 out of 19550 genes, 0.0%	1
response to muscle inactivity	2 out of 11937 genes, 0.0%	2 out of 19550 genes, 0.0%	1
response to muscle inactivity involved in regulation of muscle adaptation	2 out of 11937 genes, 0.0%	2 out of 19550 genes, 0.0%	1
positive regulation of smooth muscle cell migration	2 out of 11937 genes, 0.0%	2 out of 19550 genes, 0.0%	1
nickel cation transport	2 out of 11937 genes, 0.0%	2 out of 19550 genes, 0.0%	1
ferrous iron transport	2 out of 11937 genes, 0.0%	2 out of 19550 genes, 0.0%	1
leucine transport	2 out of 11937 genes, 0.0%	2 out of 19550 genes, 0.0%	1
purine ribonucleotide transport	2 out of 11937 genes, 0.0%	2 out of 19550 genes, 0.0%	1
L-ascorbic acid transport	2 out of 11937 genes, 0.0%	2 out of 19550 genes, 0.0%	1
prenol biosynthetic process	2 out of 11937 genes, 0.0%	2 out of 19550 genes, 0.0%	1
polyprenol biosynthetic process	2 out of 11937 genes, 0.0%	2 out of 19550 genes, 0.0%	1
iron-sulfur cluster assembly	2 out of 11937 genes, 0.0%	2 out of 19550 genes, 0.0%	1
regulation of transforming growth factor beta receptor signaling pathway	2 out of 11937 genes, 0.0%	2 out of 19550 genes, 0.0%	1
initiation of viral infection	2 out of 11937 genes, 0.0%	2 out of 19550 genes, 0.0%	1
viral assembly, maturation, egress, and release	2 out of 11937 genes, 0.0%	2 out of 19550 genes, 0.0%	1
release of virus from host	2 out of 11937 genes, 0.0%	2 out of 19550 genes, 0.0%	1
L-ascorbic acid metabolic process	2 out of 11937 genes, 0.0%	2 out of 19550 genes, 0.0%	1
translesion synthesis	2 out of 11937 genes, 0.0%	2 out of 19550 genes, 0.0%	1
somatic motor neuron differentiation	2 out of 11937 genes, 0.0%	2 out of 19550 genes, 0.0%	1
trigeminal nerve development	2 out of 11937 genes, 0.0%	2 out of 19550 genes, 0.0%	1
cerebral cortex tangential migration	2 out of 11937 genes, 0.0%	2 out of 19550 genes, 0.0%	1
cerebral cortex tangential migration using cell-cell interactions	2 out of 11937 genes, 0.0%	2 out of 19550 genes, 0.0%	1
substrate-dependent cerebral cortex tangential migration	2 out of 11937 genes, 0.0%	2 out of 19550 genes, 0.0%	1
postnatal olfactory bulb interneuron migration	2 out of 11937 genes, 0.0%	2 out of 19550 genes, 0.0%	1
extracellular matrix disassembly	2 out of 11937 genes, 0.0%	2 out of 19550 genes, 0.0%	1
sphingolipid biosynthetic process	2 out of 11937 genes, 0.0%	2 out of 19550 genes, 0.0%	1
maintenance of gastrointestinal epithelium	2 out of 11937 genes, 0.0%	2 out of 19550 genes, 0.0%	1
negative regulation of transforming growth factor beta receptor signaling pathway	2 out of 11937 genes, 0.0%	2 out of 19550 genes, 0.0%	1
cortical cytoskeleton organization	2 out of 11937 genes, 0.0%	2 out of 19550 genes, 0.0%	1
myosin filament organization	2 out of 11937 genes, 0.0%	2 out of 19550 genes, 0.0%	1
regulation of cyclin-dependent protein kinase activity involved in G2/M	2 out of 11937 genes, 0.0%	2 out of 19550 genes, 0.0%	1
regulation of glucocorticoid metabolic process	2 out of 11937 genes, 0.0%	2 out of 19550 genes, 0.0%	1
regulation of glucocorticoid biosynthetic process	2 out of 11937 genes, 0.0%	2 out of 19550 genes, 0.0%	1
regulation of Ran protein signal transduction	2 out of 11937 genes, 0.0%	2 out of 19550 genes, 0.0%	1
response to magnesium ion	2 out of 11937 genes, 0.0%	2 out of 19550 genes, 0.0%	1
response to food	2 out of 11937 genes, 0.0%	2 out of 19550 genes, 0.0%	1
regulation of Ran GTPase activity	2 out of 11937 genes, 0.0%	2 out of 19550 genes, 0.0%	1
regulation of hormone metabolic process	2 out of 11937 genes, 0.0%	2 out of 19550 genes, 0.0%	1
regulation of proteasomal ubiquitin-dependent protein catabolic process	2 out of 11937 genes, 0.0%	2 out of 19550 genes, 0.0%	1
negative regulation of proteasomal ubiquitin-dependent protein catabolic process	2 out of 11937 genes, 0.0%	2 out of 19550 genes, 0.0%	1
regulation of neurotrophin production	2 out of 11937 genes, 0.0%	2 out of 19550 genes, 0.0%	1
negative regulation of neurotrophin production	2 out of 11937 genes, 0.0%	2 out of 19550 genes, 0.0%	1
protein glycosylation in Golgi	2 out of 11937 genes, 0.0%	2 out of 19550 genes, 0.0%	1
osteoblast proliferation	2 out of 11937 genes, 0.0%	2 out of 19550 genes, 0.0%	1
cellular protein complex localization	2 out of 11937 genes, 0.0%	2 out of 19550 genes, 0.0%	1
maintenance of apical/basal cell polarity	2 out of 11937 genes, 0.0%	2 out of 19550 genes, 0.0%	1
organ growth	2 out of 11937 genes, 0.0%	2 out of 19550 genes, 0.0%	1
histone-tyrosine phosphorylation	2 out of 11937 genes, 0.0%	2 out of 19550 genes, 0.0%	1
oxidative DNA demethylation	2 out of 11937 genes, 0.0%	2 out of 19550 genes, 0.0%	1
epithelial cell differentiation involved in kidney development	2 out of 11937 genes, 0.0%	2 out of 19550 genes, 0.0%	1
germ-line stem cell division	2 out of 11937 genes, 0.0%	2 out of 19550 genes, 0.0%	1
heme metabolic process	2 out of 11937 genes, 0.0%	2 out of 19550 genes, 0.0%	1
negative regulation of protein catabolic process	2 out of 11937 genes, 0.0%	2 out of 19550 genes, 0.0%	1
GDP-L-fucose biosynthetic process	2 out of 11937 genes, 0.0%	2 out of 19550 genes, 0.0%	1
deoxyguanosine metabolic process	2 out of 11937 genes, 0.0%	2 out of 19550 genes, 0.0%	1
hyperosmotic salinity response	2 out of 11937 genes, 0.0%	2 out of 19550 genes, 0.0%	1
amyloid precursor protein metabolic process	2 out of 11937 genes, 0.0%	2 out of 19550 genes, 0.0%	1
amyloid precursor protein catabolic process	2 out of 11937 genes, 0.0%	2 out of 19550 genes, 0.0%	1
negative regulation of Golgi to plasma membrane protein transport	2 out of 11937 genes, 0.0%	2 out of 19550 genes, 0.0%	1
regulation of Golgi to plasma membrane CFTR protein transport	2 out of 11937 genes, 0.0%	2 out of 19550 genes, 0.0%	1
negative regulation of Golgi to plasma membrane CFTR protein transport	2 out of 11937 genes, 0.0%	2 out of 19550 genes, 0.0%	1
meiotic metaphase I plate congression	2 out of 11937 genes, 0.0%	2 out of 19550 genes, 0.0%	1
purine nucleobase salvage	2 out of 11937 genes, 0.0%	2 out of 19550 genes, 0.0%	1
CD4-positive or CD8-positive, alpha-beta T cell lineage commitment	2 out of 11937 genes, 0.0%	2 out of 19550 genes, 0.0%	1
MAPK phosphatase export from nucleus	2 out of 11937 genes, 0.0%	2 out of 19550 genes, 0.0%	1
negative regulation of proteolysis	2 out of 11937 genes, 0.0%	2 out of 19550 genes, 0.0%	1
negative regulation of fatty acid metabolic process	2 out of 11937 genes, 0.0%	2 out of 19550 genes, 0.0%	1
regulation of transcription by glucose	2 out of 11937 genes, 0.0%	2 out of 19550 genes, 0.0%	1
deoxyinosine metabolic process	2 out of 11937 genes, 0.0%	2 out of 19550 genes, 0.0%	1
GDP-L-fucose metabolic process	2 out of 11937 genes, 0.0%	2 out of 19550 genes, 0.0%	1
membrane lipid biosynthetic process	2 out of 11937 genes, 0.0%	2 out of 19550 genes, 0.0%	1
non-lytic viral release	2 out of 11937 genes, 0.0%	2 out of 19550 genes, 0.0%	1
regulation of hormone biosynthetic process	2 out of 11937 genes, 0.0%	2 out of 19550 genes, 0.0%	1
nonassociative learning	2 out of 11937 genes, 0.0%	2 out of 19550 genes, 0.0%	1
synaptic vesicle endocytosis	2 out of 11937 genes, 0.0%	2 out of 19550 genes, 0.0%	1
positive regulation of collateral sprouting	2 out of 11937 genes, 0.0%	2 out of 19550 genes, 0.0%	1
smooth muscle cell differentiation	2 out of 11937 genes, 0.0%	2 out of 19550 genes, 0.0%	1
meiotic metaphase plate congression	2 out of 11937 genes, 0.0%	2 out of 19550 genes, 0.0%	1
induction by organism of defense response of other organism involved in symbiotic interaction	2 out of 11937 genes, 0.0%	2 out of 19550 genes, 0.0%	1
response to defense-related nitric oxide production by other organism involved in symbiotic interaction	2 out of 11937 genes, 0.0%	2 out of 19550 genes, 0.0%	1
ventricular cardiac muscle tissue morphogenesis	2 out of 11937 genes, 0.0%	2 out of 19550 genes, 0.0%	1
negative regulation of cardiac muscle contraction	2 out of 11937 genes, 0.0%	2 out of 19550 genes, 0.0%	1
left/right pattern formation	2 out of 11937 genes, 0.0%	2 out of 19550 genes, 0.0%	1
proton-transporting V-type ATPase complex assembly	2 out of 11937 genes, 0.0%	2 out of 19550 genes, 0.0%	1
synaptonemal complex organization	2 out of 11937 genes, 0.0%	2 out of 19550 genes, 0.0%	1
establishment of protein localization to chromosome	2 out of 11937 genes, 0.0%	2 out of 19550 genes, 0.0%	1
regulation of fat cell proliferation	2 out of 11937 genes, 0.0%	2 out of 19550 genes, 0.0%	1
negative regulation of nucleotide-binding oligomerization domain containing signaling pathway	2 out of 11937 genes, 0.0%	2 out of 19550 genes, 0.0%	1
leukocyte aggregation	2 out of 11937 genes, 0.0%	2 out of 19550 genes, 0.0%	1
T cell aggregation	2 out of 11937 genes, 0.0%	2 out of 19550 genes, 0.0%	1
misfolded protein transport	2 out of 11937 genes, 0.0%	2 out of 19550 genes, 0.0%	1
DNA-dependent transcriptional preinitiation complex assembly	2 out of 11937 genes, 0.0%	2 out of 19550 genes, 0.0%	1
neutrophil mediated killing of bacterium	2 out of 11937 genes, 0.0%	2 out of 19550 genes, 0.0%	1
cellular response to fatty acid	2 out of 11937 genes, 0.0%	2 out of 19550 genes, 0.0%	1
lymphocyte aggregation	2 out of 11937 genes, 0.0%	2 out of 19550 genes, 0.0%	1
mitotic cell cycle G2/M transition checkpoint	2 out of 11937 genes, 0.0%	2 out of 19550 genes, 0.0%	1
macrophage apoptotic process	2 out of 11937 genes, 0.0%	2 out of 19550 genes, 0.0%	1
DNA biosynthetic process	2 out of 11937 genes, 0.0%	2 out of 19550 genes, 0.0%	1
mesangial cell differentiation	2 out of 11937 genes, 0.0%	2 out of 19550 genes, 0.0%	1
glomerular mesangial cell differentiation	2 out of 11937 genes, 0.0%	2 out of 19550 genes, 0.0%	1
glomerular epithelium development	2 out of 11937 genes, 0.0%	2 out of 19550 genes, 0.0%	1
glomerular mesangium development	2 out of 11937 genes, 0.0%	2 out of 19550 genes, 0.0%	1
glomerular visceral epithelial cell differentiation	2 out of 11937 genes, 0.0%	2 out of 19550 genes, 0.0%	1
regulation of glomerular mesangial cell proliferation	2 out of 11937 genes, 0.0%	2 out of 19550 genes, 0.0%	1
glomerular epithelial cell differentiation	2 out of 11937 genes, 0.0%	2 out of 19550 genes, 0.0%	1
protein localization in plasma membrane	2 out of 11937 genes, 0.0%	2 out of 19550 genes, 0.0%	1
DNA demethylation	2 out of 11937 genes, 0.0%	2 out of 19550 genes, 0.0%	1
regulation of steroid hormone biosynthetic process	2 out of 11937 genes, 0.0%	2 out of 19550 genes, 0.0%	1
regulation of transmembrane receptor protein serine/threonine kinase signaling pathway	2 out of 11937 genes, 0.0%	2 out of 19550 genes, 0.0%	1
negative regulation of transmembrane receptor protein serine/threonine kinase signaling pathway	2 out of 11937 genes, 0.0%	2 out of 19550 genes, 0.0%	1
regulation of glomerulus development	2 out of 11937 genes, 0.0%	2 out of 19550 genes, 0.0%	1
branched-chain amino-acid anion transport	2 out of 11937 genes, 0.0%	2 out of 19550 genes, 0.0%	1
cytosolic calcium ion homeostasis	115 out of 11937 genes, 1.0%	184 out of 19550 genes, 0.9%	1
developmental growth involved in morphogenesis	34 out of 11937 genes, 0.3%	53 out of 19550 genes, 0.3%	1
cytokine-mediated signaling pathway	81 out of 11937 genes, 0.7%	129 out of 19550 genes, 0.7%	1
cellular response to cytokine stimulus	81 out of 11937 genes, 0.7%	129 out of 19550 genes, 0.7%	1
negative regulation of binding	47 out of 11937 genes, 0.4%	74 out of 19550 genes, 0.4%	1
leukocyte differentiation	193 out of 11937 genes, 1.6%	311 out of 19550 genes, 1.6%	1
cellular macromolecule catabolic process	360 out of 11937 genes, 3.0%	583 out of 19550 genes, 3.0%	1
neural plate development	9 out of 11937 genes, 0.1%	13 out of 19550 genes, 0.1%	1
subpallium development	9 out of 11937 genes, 0.1%	13 out of 19550 genes, 0.1%	1
axon regeneration	9 out of 11937 genes, 0.1%	13 out of 19550 genes, 0.1%	1
response to gonadotropin stimulus	9 out of 11937 genes, 0.1%	13 out of 19550 genes, 0.1%	1
tissue regeneration	9 out of 11937 genes, 0.1%	13 out of 19550 genes, 0.1%	1
response to axon injury	9 out of 11937 genes, 0.1%	13 out of 19550 genes, 0.1%	1
dichotomous subdivision of an epithelial terminal unit	9 out of 11937 genes, 0.1%	13 out of 19550 genes, 0.1%	1
ubiquitin-dependent protein catabolic process	137 out of 11937 genes, 1.1%	220 out of 19550 genes, 1.1%	1
organic acid catabolic process	76 out of 11937 genes, 0.6%	121 out of 19550 genes, 0.6%	1
epidermal cell differentiation	55 out of 11937 genes, 0.5%	87 out of 19550 genes, 0.4%	1
prostanoid metabolic process	24 out of 11937 genes, 0.2%	37 out of 19550 genes, 0.2%	1
leukocyte mediated immunity	92 out of 11937 genes, 0.8%	147 out of 19550 genes, 0.8%	1
cytokine production involved in immune response	19 out of 11937 genes, 0.2%	29 out of 19550 genes, 0.1%	1
regulation of blood coagulation	19 out of 11937 genes, 0.2%	29 out of 19550 genes, 0.1%	1
regulation of hemostasis	19 out of 11937 genes, 0.2%	29 out of 19550 genes, 0.1%	1
glutamate receptor signaling pathway	14 out of 11937 genes, 0.1%	21 out of 19550 genes, 0.1%	1
regulation of cell-cell adhesion	14 out of 11937 genes, 0.1%	21 out of 19550 genes, 0.1%	1
regulation of sterol transport	14 out of 11937 genes, 0.1%	21 out of 19550 genes, 0.1%	1
regulation of cholesterol transport	14 out of 11937 genes, 0.1%	21 out of 19550 genes, 0.1%	1
regulation of cellular amine metabolic process	14 out of 11937 genes, 0.1%	21 out of 19550 genes, 0.1%	1
regulation of positive chemotaxis	14 out of 11937 genes, 0.1%	21 out of 19550 genes, 0.1%	1
positive regulation of positive chemotaxis	14 out of 11937 genes, 0.1%	21 out of 19550 genes, 0.1%	1
hormone secretion	95 out of 11937 genes, 0.8%	152 out of 19550 genes, 0.8%	1
regulation of cell migration	66 out of 11937 genes, 0.6%	105 out of 19550 genes, 0.5%	1
[truncated: 1,580 more rows]

## Sheet: cellular component
Gene Ontology term	Cluster frequency	Genome frequency of use	Corrected P-value
cell	10253 out of 12493 genes, 82.1%	16189 out of 20131 genes, 80.4%	1.34e-11
cell part	10253 out of 12493 genes, 82.1%	16189 out of 20131 genes, 80.4%	1.34e-11
intracellular	9188 out of 12493 genes, 73.5%	14474 out of 20131 genes, 71.9%	7.68e-09
intracellular part	9147 out of 12493 genes, 73.2%	14416 out of 20131 genes, 71.6%	2.55e-08
intracellular organelle	7741 out of 12493 genes, 62.0%	12182 out of 20131 genes, 60.5%	1.65e-05
cytoskeleton	1146 out of 12493 genes, 9.2%	1684 out of 20131 genes, 8.4%	1.99e-05
organelle	7840 out of 12493 genes, 62.8%	12347 out of 20131 genes, 61.3%	2.58e-05
microtubule cytoskeleton	599 out of 12493 genes, 4.8%	857 out of 20131 genes, 4.3%	0.00022
cytoskeletal part	670 out of 12493 genes, 5.4%	974 out of 20131 genes, 4.8%	0.00163
intracellular membrane-bounded organelle	6939 out of 12493 genes, 55.5%	10937 out of 20131 genes, 54.3%	0.00206
microtubule associated complex	84 out of 12493 genes, 0.7%	103 out of 20131 genes, 0.5%	0.00567
membrane-bounded organelle	7027 out of 12493 genes, 56.2%	11098 out of 20131 genes, 55.1%	0.00944
non-membrane-bounded organelle	1945 out of 12493 genes, 15.6%	2978 out of 20131 genes, 14.8%	0.0146
intracellular non-membrane-bounded organelle	1945 out of 12493 genes, 15.6%	2978 out of 20131 genes, 14.8%	0.0146
protein complex	1781 out of 12493 genes, 14.3%	2725 out of 20131 genes, 13.5%	0.02686
plasma membrane	1162 out of 12493 genes, 9.3%	1757 out of 20131 genes, 8.7%	0.0451
plasma membrane part	1113 out of 12493 genes, 8.9%	1683 out of 20131 genes, 8.4%	0.06396
cell periphery	1172 out of 12493 genes, 9.4%	1780 out of 20131 genes, 8.8%	0.11412
chromatin remodeling complex	114 out of 12493 genes, 0.9%	151 out of 20131 genes, 0.8%	0.12065
cell projection	927 out of 12493 genes, 7.4%	1403 out of 20131 genes, 7.0%	0.26631
neuron projection	530 out of 12493 genes, 4.2%	788 out of 20131 genes, 3.9%	0.43855
SWI/SNF-type complex	25 out of 12493 genes, 0.2%	28 out of 20131 genes, 0.1%	0.56021
membrane-enclosed lumen	1772 out of 12493 genes, 14.2%	2743 out of 20131 genes, 13.6%	0.64213
organelle lumen	1765 out of 12493 genes, 14.1%	2734 out of 20131 genes, 13.6%	0.76908
calcium channel complex	46 out of 12493 genes, 0.4%	57 out of 20131 genes, 0.3%	0.77435
intracellular organelle lumen	1763 out of 12493 genes, 14.1%	2731 out of 20131 genes, 13.6%	0.7803
cation channel complex	58 out of 12493 genes, 0.5%	74 out of 20131 genes, 0.4%	0.79567
protein-DNA complex	24 out of 12493 genes, 0.2%	27 out of 20131 genes, 0.1%	0.8128
insoluble fraction	1013 out of 12493 genes, 8.1%	1548 out of 20131 genes, 7.7%	0.88663
cell junction	358 out of 12493 genes, 2.9%	527 out of 20131 genes, 2.6%	1
nuclear lumen	1721 out of 12493 genes, 13.8%	2673 out of 20131 genes, 13.3%	1
RNAi effector complex	11 out of 12493 genes, 0.1%	11 out of 20131 genes, 0.1%	1
ion channel complex	95 out of 12493 genes, 0.8%	130 out of 20131 genes, 0.6%	1
proteinaceous extracellular matrix	107 out of 12493 genes, 0.9%	148 out of 20131 genes, 0.7%	1
cell fraction	1346 out of 12493 genes, 10.8%	2083 out of 20131 genes, 10.3%	1
anchoring junction	159 out of 12493 genes, 1.3%	227 out of 20131 genes, 1.1%	1
microtubule organizing center	242 out of 12493 genes, 1.9%	354 out of 20131 genes, 1.8%	1
microsome	14 out of 12493 genes, 0.1%	15 out of 20131 genes, 0.1%	1
ISWI complex	10 out of 12493 genes, 0.1%	10 out of 20131 genes, 0.0%	1
integral to plasma membrane	217 out of 12493 genes, 1.7%	317 out of 20131 genes, 1.6%	1
cytoplasmic part	3812 out of 12493 genes, 30.5%	6025 out of 20131 genes, 29.9%	1
dendrite	133 out of 12493 genes, 1.1%	190 out of 20131 genes, 0.9%	1
endosome	249 out of 12493 genes, 2.0%	368 out of 20131 genes, 1.8%	1
nucleus	1928 out of 12493 genes, 15.4%	3019 out of 20131 genes, 15.0%	1
cytoplasm	3829 out of 12493 genes, 30.6%	6058 out of 20131 genes, 30.1%	1
intrinsic to plasma membrane	226 out of 12493 genes, 1.8%	333 out of 20131 genes, 1.7%	1
nuclear part	1896 out of 12493 genes, 15.2%	2971 out of 20131 genes, 14.8%	1
filopodium	12 out of 12493 genes, 0.1%	13 out of 20131 genes, 0.1%	1
membrane fraction	500 out of 12493 genes, 4.0%	761 out of 20131 genes, 3.8%	1
intracellular organelle part	3611 out of 12493 genes, 28.9%	5716 out of 20131 genes, 28.4%	1
presynaptic membrane	8 out of 12493 genes, 0.1%	8 out of 20131 genes, 0.0%	1
fibril	8 out of 12493 genes, 0.1%	8 out of 20131 genes, 0.0%	1
H3 histone acetyltransferase complex	8 out of 12493 genes, 0.1%	8 out of 20131 genes, 0.0%	1
synaptic membrane	8 out of 12493 genes, 0.1%	8 out of 20131 genes, 0.0%	1
cell leading edge	211 out of 12493 genes, 1.7%	312 out of 20131 genes, 1.5%	1
chromosome, telomeric region	27 out of 12493 genes, 0.2%	34 out of 20131 genes, 0.2%	1
telomere cap complex	14 out of 12493 genes, 0.1%	16 out of 20131 genes, 0.1%	1
Golgi-associated vesicle	40 out of 12493 genes, 0.3%	53 out of 20131 genes, 0.3%	1
cell-cell junction	196 out of 12493 genes, 1.6%	290 out of 20131 genes, 1.4%	1
histone acetyltransferase complex	54 out of 12493 genes, 0.4%	74 out of 20131 genes, 0.4%	1
apicolateral plasma membrane	99 out of 12493 genes, 0.8%	142 out of 20131 genes, 0.7%	1
apical junction complex	99 out of 12493 genes, 0.8%	142 out of 20131 genes, 0.7%	1
vesicle	794 out of 12493 genes, 6.4%	1231 out of 20131 genes, 6.1%	1
synapse	125 out of 12493 genes, 1.0%	182 out of 20131 genes, 0.9%	1
nucleosome	10 out of 12493 genes, 0.1%	11 out of 20131 genes, 0.1%	1
cell-cell contact zone	10 out of 12493 genes, 0.1%	11 out of 20131 genes, 0.1%	1
dynein complex	25 out of 12493 genes, 0.2%	32 out of 20131 genes, 0.2%	1
extracellular matrix	246 out of 12493 genes, 2.0%	370 out of 20131 genes, 1.8%	1
extracellular matrix part	50 out of 12493 genes, 0.4%	69 out of 20131 genes, 0.3%	1
organelle part	4072 out of 12493 genes, 32.6%	6474 out of 20131 genes, 32.2%	1
Golgi apparatus part	267 out of 12493 genes, 2.1%	404 out of 20131 genes, 2.0%	1
sarcolemma	41 out of 12493 genes, 0.3%	56 out of 20131 genes, 0.3%	1
basal plasma membrane	9 out of 12493 genes, 0.1%	10 out of 20131 genes, 0.0%	1
sarcoplasm	9 out of 12493 genes, 0.1%	10 out of 20131 genes, 0.0%	1
basal part of cell	9 out of 12493 genes, 0.1%	10 out of 20131 genes, 0.0%	1
myelin sheath	14 out of 12493 genes, 0.1%	17 out of 20131 genes, 0.1%	1
ruffle	40 out of 12493 genes, 0.3%	55 out of 20131 genes, 0.3%	1
striated muscle thin filament	23 out of 12493 genes, 0.2%	30 out of 20131 genes, 0.1%	1
spindle	88 out of 12493 genes, 0.7%	128 out of 20131 genes, 0.6%	1
leading edge membrane	29 out of 12493 genes, 0.2%	39 out of 20131 genes, 0.2%	1
neuron projection membrane	29 out of 12493 genes, 0.2%	39 out of 20131 genes, 0.2%	1
Golgi apparatus	272 out of 12493 genes, 2.2%	415 out of 20131 genes, 2.1%	1
integral to membrane	1165 out of 12493 genes, 9.3%	1831 out of 20131 genes, 9.1%	1
replication fork	11 out of 12493 genes, 0.1%	13 out of 20131 genes, 0.1%	1
macromolecular complex	2383 out of 12493 genes, 19.1%	3778 out of 20131 genes, 18.8%	1
sarcoplasmic reticulum	8 out of 12493 genes, 0.1%	9 out of 20131 genes, 0.0%	1
proteasome accessory complex	13 out of 12493 genes, 0.1%	16 out of 20131 genes, 0.1%	1
acrosomal vesicle	15 out of 12493 genes, 0.1%	19 out of 20131 genes, 0.1%	1
nucleolus	17 out of 12493 genes, 0.1%	22 out of 20131 genes, 0.1%	1
nucleolar part	17 out of 12493 genes, 0.1%	22 out of 20131 genes, 0.1%	1
cytoplasmic vesicle	646 out of 12493 genes, 5.2%	1010 out of 20131 genes, 5.0%	1
early endosome	45 out of 12493 genes, 0.4%	64 out of 20131 genes, 0.3%	1
cell projection membrane	45 out of 12493 genes, 0.4%	64 out of 20131 genes, 0.3%	1
brush border	39 out of 12493 genes, 0.3%	55 out of 20131 genes, 0.3%	1
AP-type membrane coat adaptor complex	23 out of 12493 genes, 0.2%	31 out of 20131 genes, 0.2%	1
microtubule	37 out of 12493 genes, 0.3%	52 out of 20131 genes, 0.3%	1
microtubule organizing center attachment site	12 out of 12493 genes, 0.1%	15 out of 20131 genes, 0.1%	1
clathrin coat of endocytic vesicle	14 out of 12493 genes, 0.1%	18 out of 20131 genes, 0.1%	1
clathrin-coated endocytic vesicle membrane	14 out of 12493 genes, 0.1%	18 out of 20131 genes, 0.1%	1
clathrin-coated endocytic vesicle	14 out of 12493 genes, 0.1%	18 out of 20131 genes, 0.1%	1
pre-autophagosomal structure	7 out of 12493 genes, 0.1%	8 out of 20131 genes, 0.0%	1
myosin complex	30 out of 12493 genes, 0.2%	42 out of 20131 genes, 0.2%	1
clathrin vesicle coat	20 out of 12493 genes, 0.2%	27 out of 20131 genes, 0.1%	1
endomembrane system	836 out of 12493 genes, 6.7%	1317 out of 20131 genes, 6.5%	1
proteasome regulatory particle	4 out of 12493 genes, 0.0%	4 out of 20131 genes, 0.0%	1
kinesin complex	4 out of 12493 genes, 0.0%	4 out of 20131 genes, 0.0%	1
integrin complex	4 out of 12493 genes, 0.0%	4 out of 20131 genes, 0.0%	1
contractile fiber part	99 out of 12493 genes, 0.8%	149 out of 20131 genes, 0.7%	1
spindle pole	11 out of 12493 genes, 0.1%	14 out of 20131 genes, 0.1%	1
A band	11 out of 12493 genes, 0.1%	14 out of 20131 genes, 0.1%	1
Golgi stack	17 out of 12493 genes, 0.1%	23 out of 20131 genes, 0.1%	1
intrinsic to peroxisomal membrane	17 out of 12493 genes, 0.1%	23 out of 20131 genes, 0.1%	1
septin cytoskeleton	17 out of 12493 genes, 0.1%	23 out of 20131 genes, 0.1%	1
sarcomere	97 out of 12493 genes, 0.8%	147 out of 20131 genes, 0.7%	1
small nucleolar ribonucleoprotein complex	6 out of 12493 genes, 0.0%	7 out of 20131 genes, 0.0%	1
sarcoplasmic reticulum membrane	6 out of 12493 genes, 0.0%	7 out of 20131 genes, 0.0%	1
proton-transporting two-sector ATPase complex, catalytic domain	6 out of 12493 genes, 0.0%	7 out of 20131 genes, 0.0%	1
mitochondrial matrix	39 out of 12493 genes, 0.3%	57 out of 20131 genes, 0.3%	1
cohesin complex	8 out of 12493 genes, 0.1%	10 out of 20131 genes, 0.0%	1
adherens junction	115 out of 12493 genes, 0.9%	176 out of 20131 genes, 0.9%	1
origin recognition complex	10 out of 12493 genes, 0.1%	13 out of 20131 genes, 0.1%	1
axoneme	44 out of 12493 genes, 0.4%	65 out of 20131 genes, 0.3%	1
intrinsic to organelle membrane	139 out of 12493 genes, 1.1%	214 out of 20131 genes, 1.1%	1
collagen	12 out of 12493 genes, 0.1%	16 out of 20131 genes, 0.1%	1
organelle subcompartment	12 out of 12493 genes, 0.1%	16 out of 20131 genes, 0.1%	1
Golgi cisterna	12 out of 12493 genes, 0.1%	16 out of 20131 genes, 0.1%	1
nuclear periphery	68 out of 12493 genes, 0.5%	103 out of 20131 genes, 0.5%	1
histone methyltransferase complex	34 out of 12493 genes, 0.3%	50 out of 20131 genes, 0.2%	1
FACIT collagen	3 out of 12493 genes, 0.0%	3 out of 20131 genes, 0.0%	1
nuclear outer membrane-endoplasmic reticulum membrane network	132 out of 12493 genes, 1.1%	204 out of 20131 genes, 1.0%	1
secretory granule	156 out of 12493 genes, 1.2%	242 out of 20131 genes, 1.2%	1
inclusion body	19 out of 12493 genes, 0.2%	27 out of 20131 genes, 0.1%	1
cell body	320 out of 12493 genes, 2.6%	503 out of 20131 genes, 2.5%	1
peroxisomal membrane	17 out of 12493 genes, 0.1%	24 out of 20131 genes, 0.1%	1
caveola	17 out of 12493 genes, 0.1%	24 out of 20131 genes, 0.1%	1
microbody membrane	17 out of 12493 genes, 0.1%	24 out of 20131 genes, 0.1%	1
membrane raft	17 out of 12493 genes, 0.1%	24 out of 20131 genes, 0.1%	1
actin cytoskeleton	196 out of 12493 genes, 1.6%	306 out of 20131 genes, 1.5%	1
nucleotide-excision repair complex	5 out of 12493 genes, 0.0%	6 out of 20131 genes, 0.0%	1
nuclear telomere cap complex	5 out of 12493 genes, 0.0%	6 out of 20131 genes, 0.0%	1
intraflagellar transport particle	5 out of 12493 genes, 0.0%	6 out of 20131 genes, 0.0%	1
nuclear inner membrane	9 out of 12493 genes, 0.1%	12 out of 20131 genes, 0.1%	1
nuclear chromosome, telomeric region	7 out of 12493 genes, 0.1%	9 out of 20131 genes, 0.0%	1
mitochondrial intermembrane space	7 out of 12493 genes, 0.1%	9 out of 20131 genes, 0.0%	1
anchoring collagen	7 out of 12493 genes, 0.1%	9 out of 20131 genes, 0.0%	1
organelle envelope lumen	7 out of 12493 genes, 0.1%	9 out of 20131 genes, 0.0%	1
basolateral plasma membrane	123 out of 12493 genes, 1.0%	191 out of 20131 genes, 0.9%	1
vacuole	253 out of 12493 genes, 2.0%	398 out of 20131 genes, 2.0%	1
platelet alpha granule	34 out of 12493 genes, 0.3%	51 out of 20131 genes, 0.3%	1
microvillus	46 out of 12493 genes, 0.4%	70 out of 20131 genes, 0.3%	1
myofibril	128 out of 12493 genes, 1.0%	200 out of 20131 genes, 1.0%	1
cell-substrate adherens junction	94 out of 12493 genes, 0.8%	146 out of 20131 genes, 0.7%	1
cell-substrate junction	94 out of 12493 genes, 0.8%	146 out of 20131 genes, 0.7%	1
nuclear chromosome	117 out of 12493 genes, 0.9%	183 out of 20131 genes, 0.9%	1
DNA-directed RNA polymerase complex	19 out of 12493 genes, 0.2%	28 out of 20131 genes, 0.1%	1
DNA-directed RNA polymerase II, holoenzyme	19 out of 12493 genes, 0.2%	28 out of 20131 genes, 0.1%	1
nuclear DNA-directed RNA polymerase complex	19 out of 12493 genes, 0.2%	28 out of 20131 genes, 0.1%	1
lytic vacuole	219 out of 12493 genes, 1.8%	346 out of 20131 genes, 1.7%	1
transport vesicle	62 out of 12493 genes, 0.5%	96 out of 20131 genes, 0.5%	1
intrinsic to nuclear inner membrane	8 out of 12493 genes, 0.1%	11 out of 20131 genes, 0.1%	1
intrinsic to mitochondrial outer membrane	8 out of 12493 genes, 0.1%	11 out of 20131 genes, 0.1%	1
nuclear membrane part	8 out of 12493 genes, 0.1%	11 out of 20131 genes, 0.1%	1
endosome membrane	31 out of 12493 genes, 0.2%	47 out of 20131 genes, 0.2%	1
nucleoplasm part	353 out of 12493 genes, 2.8%	561 out of 20131 genes, 2.8%	1
synapse part	60 out of 12493 genes, 0.5%	93 out of 20131 genes, 0.5%	1
cell division site	36 out of 12493 genes, 0.3%	55 out of 20131 genes, 0.3%	1
cell division site part	36 out of 12493 genes, 0.3%	55 out of 20131 genes, 0.3%	1
secretory granule membrane	29 out of 12493 genes, 0.2%	44 out of 20131 genes, 0.2%	1
basal lamina	6 out of 12493 genes, 0.0%	8 out of 20131 genes, 0.0%	1
endoplasmic reticulum lumen	6 out of 12493 genes, 0.0%	8 out of 20131 genes, 0.0%	1
ribonuclease P complex	6 out of 12493 genes, 0.0%	8 out of 20131 genes, 0.0%	1
multimeric ribonuclease P complex	6 out of 12493 genes, 0.0%	8 out of 20131 genes, 0.0%	1
DNA polymerase complex	6 out of 12493 genes, 0.0%	8 out of 20131 genes, 0.0%	1
laminin complex	6 out of 12493 genes, 0.0%	8 out of 20131 genes, 0.0%	1
I band	63 out of 12493 genes, 0.5%	98 out of 20131 genes, 0.5%	1
endosomal part	32 out of 12493 genes, 0.3%	49 out of 20131 genes, 0.2%	1
site of polarized growth	101 out of 12493 genes, 0.8%	159 out of 20131 genes, 0.8%	1
aster	2 out of 12493 genes, 0.0%	2 out of 20131 genes, 0.0%	1
virion	2 out of 12493 genes, 0.0%	2 out of 20131 genes, 0.0%	1
nucleocytoplasmic shuttling complex	2 out of 12493 genes, 0.0%	2 out of 20131 genes, 0.0%	1
inhibin complex	2 out of 12493 genes, 0.0%	2 out of 20131 genes, 0.0%	1
virion part	2 out of 12493 genes, 0.0%	2 out of 20131 genes, 0.0%	1
cytoplasmic membrane-bounded vesicle	537 out of 12493 genes, 4.3%	858 out of 20131 genes, 4.3%	1
intrinsic to Golgi membrane	42 out of 12493 genes, 0.3%	65 out of 20131 genes, 0.3%	1
contractile fiber	146 out of 12493 genes, 1.2%	231 out of 20131 genes, 1.1%	1
histone deacetylase complex	18 out of 12493 genes, 0.1%	27 out of 20131 genes, 0.1%	1
vesicular fraction	315 out of 12493 genes, 2.5%	502 out of 20131 genes, 2.5%	1
Golgi membrane	114 out of 12493 genes, 0.9%	180 out of 20131 genes, 0.9%	1
methyltransferase complex	45 out of 12493 genes, 0.4%	70 out of 20131 genes, 0.3%	1
nucleoplasm	362 out of 12493 genes, 2.9%	578 out of 20131 genes, 2.9%	1
nuclear body	181 out of 12493 genes, 1.4%	288 out of 20131 genes, 1.4%	1
trans-Golgi network transport vesicle membrane	14 out of 12493 genes, 0.1%	21 out of 20131 genes, 0.1%	1
trans-Golgi network transport vesicle	14 out of 12493 genes, 0.1%	21 out of 20131 genes, 0.1%	1
Golgi-associated vesicle membrane	14 out of 12493 genes, 0.1%	21 out of 20131 genes, 0.1%	1
late endosome	61 out of 12493 genes, 0.5%	96 out of 20131 genes, 0.5%	1
RNA polymerase complex	19 out of 12493 genes, 0.2%	29 out of 20131 genes, 0.1%	1
mRNA cleavage factor complex	7 out of 12493 genes, 0.1%	10 out of 20131 genes, 0.0%	1
basement membrane	17 out of 12493 genes, 0.1%	26 out of 20131 genes, 0.1%	1
endocytic vesicle membrane	17 out of 12493 genes, 0.1%	26 out of 20131 genes, 0.1%	1
condensed nuclear chromosome	42 out of 12493 genes, 0.3%	66 out of 20131 genes, 0.3%	1
clathrin coat	22 out of 12493 genes, 0.2%	34 out of 20131 genes, 0.2%	1
membrane-bounded vesicle	591 out of 12493 genes, 4.7%	949 out of 20131 genes, 4.7%	1
clathrin-coated vesicle	139 out of 12493 genes, 1.1%	222 out of 20131 genes, 1.1%	1
BLOC complex	5 out of 12493 genes, 0.0%	7 out of 20131 genes, 0.0%	1
vesicle coat	25 out of 12493 genes, 0.2%	39 out of 20131 genes, 0.2%	1
endoplasmic reticulum membrane	119 out of 12493 genes, 1.0%	190 out of 20131 genes, 0.9%	1
preribosome	15 out of 12493 genes, 0.1%	23 out of 20131 genes, 0.1%	1
organellar small ribosomal subunit	13 out of 12493 genes, 0.1%	20 out of 20131 genes, 0.1%	1
axon	113 out of 12493 genes, 0.9%	181 out of 20131 genes, 0.9%	1
coated pit	8 out of 12493 genes, 0.1%	12 out of 20131 genes, 0.1%	1
intrinsic to mitochondrial inner membrane	8 out of 12493 genes, 0.1%	12 out of 20131 genes, 0.1%	1
vacuolar part	34 out of 12493 genes, 0.3%	54 out of 20131 genes, 0.3%	1
exosome (RNase complex)	3 out of 12493 genes, 0.0%	4 out of 20131 genes, 0.0%	1
multivesicular body	3 out of 12493 genes, 0.0%	4 out of 20131 genes, 0.0%	1
muscle myosin complex	3 out of 12493 genes, 0.0%	4 out of 20131 genes, 0.0%	1
phagocytic vesicle	3 out of 12493 genes, 0.0%	4 out of 20131 genes, 0.0%	1
nuclear membrane	24 out of 12493 genes, 0.2%	38 out of 20131 genes, 0.2%	1
clathrin coated vesicle membrane	37 out of 12493 genes, 0.3%	59 out of 20131 genes, 0.3%	1
RNA cap binding complex	11 out of 12493 genes, 0.1%	17 out of 20131 genes, 0.1%	1
nuclear ubiquitin ligase complex	19 out of 12493 genes, 0.2%	30 out of 20131 genes, 0.1%	1
centrosome	40 out of 12493 genes, 0.3%	64 out of 20131 genes, 0.3%	1
peroxisome	61 out of 12493 genes, 0.5%	98 out of 20131 genes, 0.5%	1
microbody part	61 out of 12493 genes, 0.5%	98 out of 20131 genes, 0.5%	1
peroxisomal part	61 out of 12493 genes, 0.5%	98 out of 20131 genes, 0.5%	1
SAGA-type complex	14 out of 12493 genes, 0.1%	22 out of 20131 genes, 0.1%	1
transcription elongation factor complex	6 out of 12493 genes, 0.0%	9 out of 20131 genes, 0.0%	1
clathrin coat of trans-Golgi network vesicle	6 out of 12493 genes, 0.0%	9 out of 20131 genes, 0.0%	1
membrane coat	46 out of 12493 genes, 0.4%	74 out of 20131 genes, 0.4%	1
coated membrane	46 out of 12493 genes, 0.4%	74 out of 20131 genes, 0.4%	1
vacuolar membrane	33 out of 12493 genes, 0.3%	53 out of 20131 genes, 0.3%	1
sex chromatin	9 out of 12493 genes, 0.1%	14 out of 20131 genes, 0.1%	1
mitochondrial proton-transporting ATP synthase complex	9 out of 12493 genes, 0.1%	14 out of 20131 genes, 0.1%	1
proton-transporting ATP synthase complex	9 out of 12493 genes, 0.1%	14 out of 20131 genes, 0.1%	1
transcription factor complex	49 out of 12493 genes, 0.4%	79 out of 20131 genes, 0.4%	1
intermediate filament cytoskeleton	44 out of 12493 genes, 0.4%	71 out of 20131 genes, 0.4%	1
mitochondrial outer membrane	12 out of 12493 genes, 0.1%	19 out of 20131 genes, 0.1%	1
organelle outer membrane	12 out of 12493 genes, 0.1%	19 out of 20131 genes, 0.1%	1
lamellipodium	7 out of 12493 genes, 0.1%	11 out of 20131 genes, 0.1%	1
growth cone	7 out of 12493 genes, 0.1%	11 out of 20131 genes, 0.1%	1
CUL4-RING ubiquitin ligase complex	7 out of 12493 genes, 0.1%	11 out of 20131 genes, 0.1%	1
dystrophin-associated glycoprotein complex	10 out of 12493 genes, 0.1%	16 out of 20131 genes, 0.1%	1
intrinsic to endoplasmic reticulum membrane	54 out of 12493 genes, 0.4%	88 out of 20131 genes, 0.4%	1
H4/H2A histone acetyltransferase complex	16 out of 12493 genes, 0.1%	26 out of 20131 genes, 0.1%	1
intermediate filament	41 out of 12493 genes, 0.3%	67 out of 20131 genes, 0.3%	1
cell-cell adherens junction	22 out of 12493 genes, 0.2%	36 out of 20131 genes, 0.2%	1
condensed chromosome	55 out of 12493 genes, 0.4%	90 out of 20131 genes, 0.4%	1
proteasome complex	25 out of 12493 genes, 0.2%	41 out of 20131 genes, 0.2%	1
cell projection part	179 out of 12493 genes, 1.4%	292 out of 20131 genes, 1.5%	1
endoplasmic reticulum	256 out of 12493 genes, 2.0%	417 out of 20131 genes, 2.1%	1
germ cell nucleus	14 out of 12493 genes, 0.1%	23 out of 20131 genes, 0.1%	1
extrinsic to organelle membrane	5 out of 12493 genes, 0.0%	8 out of 20131 genes, 0.0%	1
receptor complex	51 out of 12493 genes, 0.4%	84 out of 20131 genes, 0.4%	1
endoplasmic reticulum-Golgi intermediate compartment	12 out of 12493 genes, 0.1%	20 out of 20131 genes, 0.1%	1
ubiquitin ligase complex	80 out of 12493 genes, 0.6%	132 out of 20131 genes, 0.7%	1
chromosome, centromeric region	83 out of 12493 genes, 0.7%	137 out of 20131 genes, 0.7%	1
cytoplasmic chromosome	2 out of 12493 genes, 0.0%	3 out of 20131 genes, 0.0%	1
late endosome membrane	2 out of 12493 genes, 0.0%	3 out of 20131 genes, 0.0%	1
vesicle lumen	2 out of 12493 genes, 0.0%	3 out of 20131 genes, 0.0%	1
heterochromatin	13 out of 12493 genes, 0.1%	22 out of 20131 genes, 0.1%	1
nuclear chromatin	43 out of 12493 genes, 0.3%	72 out of 20131 genes, 0.4%	1
myosin II complex	10 out of 12493 genes, 0.1%	17 out of 20131 genes, 0.1%	1
PcG protein complex	10 out of 12493 genes, 0.1%	17 out of 20131 genes, 0.1%	1
coated vesicle	171 out of 12493 genes, 1.4%	282 out of 20131 genes, 1.4%	1
mitochondrial part	376 out of 12493 genes, 3.0%	616 out of 20131 genes, 3.1%	1
transcription export complex	3 out of 12493 genes, 0.0%	5 out of 20131 genes, 0.0%	1
outer membrane	14 out of 12493 genes, 0.1%	24 out of 20131 genes, 0.1%	1
endoplasmic reticulum part	198 out of 12493 genes, 1.6%	327 out of 20131 genes, 1.6%	1
anchored to membrane	33 out of 12493 genes, 0.3%	56 out of 20131 genes, 0.3%	1
proton-transporting two-sector ATPase complex	27 out of 12493 genes, 0.2%	46 out of 20131 genes, 0.2%	1
transport vesicle membrane	27 out of 12493 genes, 0.2%	46 out of 20131 genes, 0.2%	1
mitochondrion	379 out of 12493 genes, 3.0%	622 out of 20131 genes, 3.1%	1
synaptic vesicle	42 out of 12493 genes, 0.3%	71 out of 20131 genes, 0.4%	1
MHC protein complex	21 out of 12493 genes, 0.2%	36 out of 20131 genes, 0.2%	1
endocytic vesicle	57 out of 12493 genes, 0.5%	96 out of 20131 genes, 0.5%	1
unconventional myosin complex	4 out of 12493 genes, 0.0%	7 out of 20131 genes, 0.0%	1
trailing edge	4 out of 12493 genes, 0.0%	7 out of 20131 genes, 0.0%	1
pronucleus	4 out of 12493 genes, 0.0%	7 out of 20131 genes, 0.0%	1
actin filament bundle	46 out of 12493 genes, 0.4%	78 out of 20131 genes, 0.4%	1
nuclear heterochromatin	9 out of 12493 genes, 0.1%	16 out of 20131 genes, 0.1%	1
axoneme part	9 out of 12493 genes, 0.1%	16 out of 20131 genes, 0.1%	1
anchored to plasma membrane	9 out of 12493 genes, 0.1%	16 out of 20131 genes, 0.1%	1
spindle microtubule	5 out of 12493 genes, 0.0%	9 out of 20131 genes, 0.0%	1
gap junction	13 out of 12493 genes, 0.1%	23 out of 20131 genes, 0.1%	1
actin filament	27 out of 12493 genes, 0.2%	47 out of 20131 genes, 0.2%	1
neuronal cell body	52 out of 12493 genes, 0.4%	89 out of 20131 genes, 0.4%	1
cullin-RING ubiquitin ligase complex	43 out of 12493 genes, 0.3%	74 out of 20131 genes, 0.4%	1
external side of plasma membrane	6 out of 12493 genes, 0.0%	11 out of 20131 genes, 0.1%	1
dystroglycan complex	6 out of 12493 genes, 0.0%	11 out of 20131 genes, 0.1%	1
Sin3-type complex	7 out of 12493 genes, 0.1%	13 out of 20131 genes, 0.1%	1
chromosome	431 out of 12493 genes, 3.4%	713 out of 20131 genes, 3.5%	1
organellar large ribosomal subunit	12 out of 12493 genes, 0.1%	22 out of 20131 genes, 0.1%	1
cytoplasmic ubiquitin ligase complex	8 out of 12493 genes, 0.1%	15 out of 20131 genes, 0.1%	1
cilium	65 out of 12493 genes, 0.5%	112 out of 20131 genes, 0.6%	1
nonmotile primary cilium	50 out of 12493 genes, 0.4%	87 out of 20131 genes, 0.4%	1
condensed nuclear chromosome kinetochore	2 out of 12493 genes, 0.0%	4 out of 20131 genes, 0.0%	1
condensed nuclear chromosome, centromeric region	2 out of 12493 genes, 0.0%	4 out of 20131 genes, 0.0%	1
dihydrolipoyl dehydrogenase complex	2 out of 12493 genes, 0.0%	4 out of 20131 genes, 0.0%	1
organellar ribosome	31 out of 12493 genes, 0.2%	55 out of 20131 genes, 0.3%	1
gamma-tubulin large complex	3 out of 12493 genes, 0.0%	6 out of 20131 genes, 0.0%	1
palmitoyltransferase complex	3 out of 12493 genes, 0.0%	6 out of 20131 genes, 0.0%	1
endoplasmic reticulum palmitoyltransferase complex	3 out of 12493 genes, 0.0%	6 out of 20131 genes, 0.0%	1
microbody	94 out of 12493 genes, 0.8%	161 out of 20131 genes, 0.8%	1
membrane	5716 out of 12493 genes, 45.8%	9268 out of 20131 genes, 46.0%	1
COPI-coated vesicle	4 out of 12493 genes, 0.0%	8 out of 20131 genes, 0.0%	1
microtubule organizing center part	4 out of 12493 genes, 0.0%	8 out of 20131 genes, 0.0%	1
protein serine/threonine phosphatase complex	29 out of 12493 genes, 0.2%	52 out of 20131 genes, 0.3%	1
cortical cytoskeleton	10 out of 12493 genes, 0.1%	19 out of 20131 genes, 0.1%	1
cortical actin cytoskeleton	10 out of 12493 genes, 0.1%	19 out of 20131 genes, 0.1%	1
proton-transporting two-sector ATPase complex, proton-transporting domain	5 out of 12493 genes, 0.0%	10 out of 20131 genes, 0.0%	1
axon part	90 out of 12493 genes, 0.7%	155 out of 20131 genes, 0.8%	1
chromosomal part	375 out of 12493 genes, 3.0%	625 out of 20131 genes, 3.1%	1
nuclear pore	6 out of 12493 genes, 0.0%	12 out of 20131 genes, 0.1%	1
pore complex	6 out of 12493 genes, 0.0%	12 out of 20131 genes, 0.1%	1
proton-transporting V-type ATPase complex	8 out of 12493 genes, 0.1%	16 out of 20131 genes, 0.1%	1
organelle membrane	1225 out of 12493 genes, 9.8%	2016 out of 20131 genes, 10.0%	1
cytoplasmic vesicle membrane	80 out of 12493 genes, 0.6%	141 out of 20131 genes, 0.7%	1
cytoplasmic vesicle part	80 out of 12493 genes, 0.6%	141 out of 20131 genes, 0.7%	1
nuclear chromosome part	61 out of 12493 genes, 0.5%	109 out of 20131 genes, 0.5%	1
pigment granule	61 out of 12493 genes, 0.5%	109 out of 20131 genes, 0.5%	1
death-inducing signaling complex	4 out of 12493 genes, 0.0%	9 out of 20131 genes, 0.0%	1
gamma-tubulin complex	3 out of 12493 genes, 0.0%	7 out of 20131 genes, 0.0%	1
rough endoplasmic reticulum	3 out of 12493 genes, 0.0%	7 out of 20131 genes, 0.0%	1
rough endoplasmic reticulum membrane	3 out of 12493 genes, 0.0%	7 out of 20131 genes, 0.0%	1
SNARE complex	3 out of 12493 genes, 0.0%	7 out of 20131 genes, 0.0%	1
primary cilium	55 out of 12493 genes, 0.4%	99 out of 20131 genes, 0.5%	1
coated vesicle membrane	46 out of 12493 genes, 0.4%	84 out of 20131 genes, 0.4%	1
vesicle membrane	137 out of 12493 genes, 1.1%	238 out of 20131 genes, 1.2%	1
mitochondrial membrane	159 out of 12493 genes, 1.3%	275 out of 20131 genes, 1.4%	1
membrane part	4488 out of 12493 genes, 35.9%	7312 out of 20131 genes, 36.3%	1
condensed chromosome kinetochore	9 out of 12493 genes, 0.1%	19 out of 20131 genes, 0.1%	1
condensed chromosome, centromeric region	9 out of 12493 genes, 0.1%	19 out of 20131 genes, 0.1%	1
nuclear envelope	139 out of 12493 genes, 1.1%	242 out of 20131 genes, 1.2%	1
flagellum	16 out of 12493 genes, 0.1%	32 out of 20131 genes, 0.2%	1
lysosome	83 out of 12493 genes, 0.7%	149 out of 20131 genes, 0.7%	1
kinetochore	49 out of 12493 genes, 0.4%	91 out of 20131 genes, 0.5%	1
cell envelope	5 out of 12493 genes, 0.0%	12 out of 20131 genes, 0.1%	1
ribonucleoprotein granule	5 out of 12493 genes, 0.0%	12 out of 20131 genes, 0.1%	1
P granule	5 out of 12493 genes, 0.0%	12 out of 20131 genes, 0.1%	1
pole plasm	5 out of 12493 genes, 0.0%	12 out of 20131 genes, 0.1%	1
germ plasm	5 out of 12493 genes, 0.0%	12 out of 20131 genes, 0.1%	1
ionotropic glutamate receptor complex	15 out of 12493 genes, 0.1%	31 out of 20131 genes, 0.2%	1
cyclin-dependent protein kinase holoenzyme complex	4 out of 12493 genes, 0.0%	10 out of 20131 genes, 0.0%	1
tricarboxylic acid cycle enzyme complex	4 out of 12493 genes, 0.0%	10 out of 20131 genes, 0.0%	1
primary lysosome	3 out of 12493 genes, 0.0%	8 out of 20131 genes, 0.0%	1
mismatch repair complex	3 out of 12493 genes, 0.0%	8 out of 20131 genes, 0.0%	1
internal side of plasma membrane	48 out of 12493 genes, 0.4%	90 out of 20131 genes, 0.4%	1
integral to organelle membrane	11 out of 12493 genes, 0.1%	24 out of 20131 genes, 0.1%	1
mitochondrial envelope	216 out of 12493 genes, 1.7%	375 out of 20131 genes, 1.9%	1
mitochondrial tricarboxylic acid cycle enzyme complex	2 out of 12493 genes, 0.0%	6 out of 20131 genes, 0.0%	1
cell cortex	13 out of 12493 genes, 0.1%	28 out of 20131 genes, 0.1%	1
cell cortex part	13 out of 12493 genes, 0.1%	28 out of 20131 genes, 0.1%	1
extrinsic to plasma membrane	36 out of 12493 genes, 0.3%	70 out of 20131 genes, 0.3%	1
cell surface	186 out of 12493 genes, 1.5%	327 out of 20131 genes, 1.6%	1
integral to endoplasmic reticulum membrane	6 out of 12493 genes, 0.0%	15 out of 20131 genes, 0.1%	1
cytosol	10 out of 12493 genes, 0.1%	23 out of 20131 genes, 0.1%	1
cytosolic part	10 out of 12493 genes, 0.1%	23 out of 20131 genes, 0.1%	1
ER to Golgi transport vesicle	11 out of 12493 genes, 0.1%	25 out of 20131 genes, 0.1%	1
proteasome core complex	3 out of 12493 genes, 0.0%	9 out of 20131 genes, 0.0%	1
synaptic vesicle membrane	2 out of 12493 genes, 0.0%	7 out of 20131 genes, 0.0%	1
high-density lipoprotein particle	2 out of 12493 genes, 0.0%	7 out of 20131 genes, 0.0%	1
ER membrane insertion complex	2 out of 12493 genes, 0.0%	7 out of 20131 genes, 0.0%	1
extrinsic to internal side of plasma membrane	31 out of 12493 genes, 0.2%	63 out of 20131 genes, 0.3%	1
spliceosomal complex	85 out of 12493 genes, 0.7%	158 out of 20131 genes, 0.8%	1
intrinsic to membrane	3808 out of 12493 genes, 30.5%	6249 out of 20131 genes, 31.0%	1
triglyceride-rich lipoprotein particle	10 out of 12493 genes, 0.1%	24 out of 20131 genes, 0.1%	1
sex chromosome	11 out of 12493 genes, 0.1%	26 out of 20131 genes, 0.1%	1
small ribosomal subunit	35 out of 12493 genes, 0.3%	71 out of 20131 genes, 0.4%	1
T cell receptor complex	3 out of 12493 genes, 0.0%	10 out of 20131 genes, 0.0%	1
extracellular space	29 out of 12493 genes, 0.2%	61 out of 20131 genes, 0.3%	1
small nuclear ribonucleoprotein complex	16 out of 12493 genes, 0.1%	37 out of 20131 genes, 0.2%	1
signal recognition particle	2 out of 12493 genes, 0.0%	8 out of 20131 genes, 0.0%	1
catenin-TCF7L2 complex	2 out of 12493 genes, 0.0%	8 out of 20131 genes, 0.0%	1
ER to Golgi transport vesicle membrane	4 out of 12493 genes, 0.0%	13 out of 20131 genes, 0.1%	1
extrinsic to membrane	52 out of 12493 genes, 0.4%	104 out of 20131 genes, 0.5%	1
synaptonemal complex	9 out of 12493 genes, 0.1%	24 out of 20131 genes, 0.1%	1
organelle envelope	505 out of 12493 genes, 4.0%	874 out of 20131 genes, 4.3%	1
envelope	510 out of 12493 genes, 4.1%	885 out of 20131 genes, 4.4%	1
organelle inner membrane	255 out of 12493 genes, 2.0%	459 out of 20131 genes, 2.3%	1
protein-lipid complex	17 out of 12493 genes, 0.1%	43 out of 20131 genes, 0.2%	1
plasma lipoprotein particle	17 out of 12493 genes, 0.1%	43 out of 20131 genes, 0.2%	1
chromatin	137 out of 12493 genes, 1.1%	261 out of 20131 genes, 1.3%	1
mitochondrial membrane part	47 out of 12493 genes, 0.4%	101 out of 20131 genes, 0.5%	1
mitochondrial inner membrane	63 out of 12493 genes, 0.5%	131 out of 20131 genes, 0.7%	1
extracellular region part	653 out of 12493 genes, 5.2%	1142 out of 20131 genes, 5.7%	1
stereocilia coupling link	2 out of 12493 genes, 0.0%	12 out of 20131 genes, 0.1%	1
stereocilia ankle link	2 out of 12493 genes, 0.0%	12 out of 20131 genes, 0.1%	1
extracellular region	676 out of 12493 genes, 5.4%	1183 out of 20131 genes, 5.9%	1
large ribosomal subunit	28 out of 12493 genes, 0.2%	70 out of 20131 genes, 0.3%	1
ribosome	79 out of 12493 genes, 0.6%	167 out of 20131 genes, 0.8%	1
ribosomal subunit	62 out of 12493 genes, 0.5%	140 out of 20131 genes, 0.7%	1
ribonucleoprotein complex	344 out of 12493 genes, 2.8%	641 out of 20131 genes, 3.2%	1
mitochondrial respiratory chain	21 out of 12493 genes, 0.2%	63 out of 20131 genes, 0.3%	1
respiratory chain	21 out of 12493 genes, 0.2%	63 out of 20131 genes, 0.3%	1

## Sheet: molecular function
Gene Ontology term	Cluster frequency	Genome frequency of use	Corrected P-value
binding	9901 out of 12084 genes, 81.9%	15509 out of 19716 genes, 78.7%	8.59e-42
ion binding	3093 out of 12084 genes, 25.6%	4661 out of 19716 genes, 23.6%	1.39e-13
cation binding	3053 out of 12084 genes, 25.3%	4602 out of 19716 genes, 23.3%	3.1e-13
adenyl nucleotide binding	1372 out of 12084 genes, 11.4%	1980 out of 19716 genes, 10.0%	2.93e-12
adenyl ribonucleotide binding	1362 out of 12084 genes, 11.3%	1967 out of 19716 genes, 10.0%	5.44e-12
protein binding	3964 out of 12084 genes, 32.8%	6089 out of 19716 genes, 30.9%	8.26e-11
transferase activity, transferring phosphorus-containing groups	948 out of 12084 genes, 7.8%	1352 out of 19716 genes, 6.9%	1.22e-09
purine nucleotide binding	1629 out of 12084 genes, 13.5%	2410 out of 19716 genes, 12.2%	3.79e-09
ribonucleotide binding	1615 out of 12084 genes, 13.4%	2393 out of 19716 genes, 12.1%	1.01e-08
purine ribonucleotide binding	1615 out of 12084 genes, 13.4%	2393 out of 19716 genes, 12.1%	1.01e-08
nucleotide binding	1765 out of 12084 genes, 14.6%	2629 out of 19716 genes, 13.3%	1.29e-08
small molecule binding	1806 out of 12084 genes, 14.9%	2694 out of 19716 genes, 13.7%	1.47e-08
metal ion binding	2354 out of 12084 genes, 19.5%	3566 out of 19716 genes, 18.1%	5.94e-08
protein domain specific binding	406 out of 12084 genes, 3.4%	549 out of 19716 genes, 2.8%	1.34e-07
enzyme binding	777 out of 12084 genes, 6.4%	1108 out of 19716 genes, 5.6%	1.43e-07
catalytic activity	4518 out of 12084 genes, 37.4%	7059 out of 19716 genes, 35.8%	2.28e-06
kinase activity	711 out of 12084 genes, 5.9%	1018 out of 19716 genes, 5.2%	2.73e-06
kinase binding	351 out of 12084 genes, 2.9%	477 out of 19716 genes, 2.4%	6.12e-06
cytoskeletal protein binding	556 out of 12084 genes, 4.6%	787 out of 19716 genes, 4.0%	1.17e-05
transition metal ion binding	1587 out of 12084 genes, 13.1%	2401 out of 19716 genes, 12.2%	9.86e-05
phosphotransferase activity, alcohol group as acceptor	583 out of 12084 genes, 4.8%	836 out of 19716 genes, 4.2%	0.0001
small GTPase regulator activity	282 out of 12084 genes, 2.3%	383 out of 19716 genes, 1.9%	0.00016
histone deacetylase activity	31 out of 12084 genes, 0.3%	31 out of 19716 genes, 0.2%	0.00021
nucleoside-triphosphatase regulator activity	365 out of 12084 genes, 3.0%	508 out of 19716 genes, 2.6%	0.00024
GTPase regulator activity	363 out of 12084 genes, 3.0%	505 out of 19716 genes, 2.6%	0.00024
transferase activity	1602 out of 12084 genes, 13.3%	2432 out of 19716 genes, 12.3%	0.00029
enzyme activator activity	324 out of 12084 genes, 2.7%	448 out of 19716 genes, 2.3%	0.0004
enzyme regulator activity	899 out of 12084 genes, 7.4%	1331 out of 19716 genes, 6.8%	0.00048
protein kinase activity	536 out of 12084 genes, 4.4%	770 out of 19716 genes, 3.9%	0.00048
inorganic cation transmembrane transporter activity	323 out of 12084 genes, 2.7%	449 out of 19716 genes, 2.3%	0.00096
NAD-dependent histone deacetylase activity	27 out of 12084 genes, 0.2%	27 out of 19716 genes, 0.1%	0.00155
NAD-dependent protein deacetylase activity	27 out of 12084 genes, 0.2%	27 out of 19716 genes, 0.1%	0.00155
hydrolase activity	1892 out of 12084 genes, 15.7%	2905 out of 19716 genes, 14.7%	0.00179
calcium channel activity	68 out of 12084 genes, 0.6%	80 out of 19716 genes, 0.4%	0.00269
metal ion transmembrane transporter activity	293 out of 12084 genes, 2.4%	408 out of 19716 genes, 2.1%	0.00378
GTPase activator activity	103 out of 12084 genes, 0.9%	129 out of 19716 genes, 0.7%	0.00398
Ras GTPase activator activity	103 out of 12084 genes, 0.9%	129 out of 19716 genes, 0.7%	0.00398
GTPase binding	104 out of 12084 genes, 0.9%	131 out of 19716 genes, 0.7%	0.00584
ion channel activity	372 out of 12084 genes, 3.1%	532 out of 19716 genes, 2.7%	0.01355
substrate-specific channel activity	372 out of 12084 genes, 3.1%	532 out of 19716 genes, 2.7%	0.01355
divalent inorganic cation transmembrane transporter activity	71 out of 12084 genes, 0.6%	86 out of 19716 genes, 0.4%	0.01404
passive transmembrane transporter activity	390 out of 12084 genes, 3.2%	560 out of 19716 genes, 2.8%	0.01546
calcium ion transmembrane transporter activity	70 out of 12084 genes, 0.6%	85 out of 19716 genes, 0.4%	0.01906
deacetylase activity	31 out of 12084 genes, 0.3%	33 out of 19716 genes, 0.2%	0.01912
protein deacetylase activity	31 out of 12084 genes, 0.3%	33 out of 19716 genes, 0.2%	0.01912
protein kinase binding	122 out of 12084 genes, 1.0%	159 out of 19716 genes, 0.8%	0.02113
channel activity	387 out of 12084 genes, 3.2%	557 out of 19716 genes, 2.8%	0.02325
hydrolase activity, acting on carbon-nitrogen (but not peptide) bonds, in linear amides	61 out of 12084 genes, 0.5%	73 out of 19716 genes, 0.4%	0.0266
calcium-activated potassium channel activity	26 out of 12084 genes, 0.2%	27 out of 19716 genes, 0.1%	0.02809
ion gated channel activity	26 out of 12084 genes, 0.2%	27 out of 19716 genes, 0.1%	0.02809
protein serine/threonine kinase activity	184 out of 12084 genes, 1.5%	251 out of 19716 genes, 1.3%	0.03251
small GTPase binding	95 out of 12084 genes, 0.8%	121 out of 19716 genes, 0.6%	0.03332
ion transmembrane transporter activity	626 out of 12084 genes, 5.2%	931 out of 19716 genes, 4.7%	0.05766
cation channel activity	265 out of 12084 genes, 2.2%	375 out of 19716 genes, 1.9%	0.06968
hydrolase activity, acting on ester bonds	642 out of 12084 genes, 5.3%	958 out of 19716 genes, 4.9%	0.08302
pyrophosphatase activity	656 out of 12084 genes, 5.4%	983 out of 19716 genes, 5.0%	0.14171
motor activity	97 out of 12084 genes, 0.8%	127 out of 19716 genes, 0.6%	0.18904
hydrolase activity, acting on acid anhydrides, in phosphorus-containing anhydrides	656 out of 12084 genes, 5.4%	985 out of 19716 genes, 5.0%	0.19749
substrate-specific transmembrane transporter activity	742 out of 12084 genes, 6.1%	1120 out of 19716 genes, 5.7%	0.19817
potassium channel activity	129 out of 12084 genes, 1.1%	174 out of 19716 genes, 0.9%	0.19953
nucleoside-triphosphatase activity	600 out of 12084 genes, 5.0%	899 out of 19716 genes, 4.6%	0.26226
transmembrane transporter activity	813 out of 12084 genes, 6.7%	1235 out of 19716 genes, 6.3%	0.31811
hydrolase activity, acting on acid anhydrides	657 out of 12084 genes, 5.4%	990 out of 19716 genes, 5.0%	0.34248
structure-specific DNA binding	210 out of 12084 genes, 1.7%	297 out of 19716 genes, 1.5%	0.34652
potassium ion transmembrane transporter activity	138 out of 12084 genes, 1.1%	189 out of 19716 genes, 1.0%	0.38653
histone methyltransferase activity	35 out of 12084 genes, 0.3%	41 out of 19716 genes, 0.2%	0.6233
transmembrane receptor protein kinase activity	67 out of 12084 genes, 0.6%	86 out of 19716 genes, 0.4%	0.67064
protein tyrosine kinase activity	120 out of 12084 genes, 1.0%	164 out of 19716 genes, 0.8%	0.77288
tubulin binding	132 out of 12084 genes, 1.1%	182 out of 19716 genes, 0.9%	0.80098
kinase regulator activity	123 out of 12084 genes, 1.0%	169 out of 19716 genes, 0.9%	0.94509
Rho GTPase activator activity	28 out of 12084 genes, 0.2%	32 out of 19716 genes, 0.2%	0.96961
histone-lysine N-methyltransferase activity	28 out of 12084 genes, 0.2%	32 out of 19716 genes, 0.2%	0.96961
substrate-specific transporter activity	848 out of 12084 genes, 7.0%	1299 out of 19716 genes, 6.6%	1
Ras GTPase binding	67 out of 12084 genes, 0.6%	87 out of 19716 genes, 0.4%	1
phosphatidylinositol binding	78 out of 12084 genes, 0.6%	103 out of 19716 genes, 0.5%	1
cation transmembrane transporter activity	428 out of 12084 genes, 3.5%	639 out of 19716 genes, 3.2%	1
protein complex scaffold	30 out of 12084 genes, 0.2%	35 out of 19716 genes, 0.2%	1
sequence-specific DNA binding	227 out of 12084 genes, 1.9%	328 out of 19716 genes, 1.7%	1
antiporter activity	32 out of 12084 genes, 0.3%	38 out of 19716 genes, 0.2%	1
monovalent inorganic cation transmembrane transporter activity	238 out of 12084 genes, 2.0%	346 out of 19716 genes, 1.8%	1
transcription factor binding	143 out of 12084 genes, 1.2%	201 out of 19716 genes, 1.0%	1
protein kinase regulator activity	111 out of 12084 genes, 0.9%	153 out of 19716 genes, 0.8%	1
phosphotransferase activity, phosphate group as acceptor	50 out of 12084 genes, 0.4%	64 out of 19716 genes, 0.3%	1
hydrolase activity, acting on carbon-nitrogen (but not peptide) bonds	103 out of 12084 genes, 0.9%	142 out of 19716 genes, 0.7%	1
DNA binding	685 out of 12084 genes, 5.7%	1049 out of 19716 genes, 5.3%	1
transporter activity	927 out of 12084 genes, 7.7%	1434 out of 19716 genes, 7.3%	1
phosphoric ester hydrolase activity	316 out of 12084 genes, 2.6%	470 out of 19716 genes, 2.4%	1
calcium activated cation channel activity	32 out of 12084 genes, 0.3%	39 out of 19716 genes, 0.2%	1
Rho guanyl-nucleotide exchange factor activity	11 out of 12084 genes, 0.1%	11 out of 19716 genes, 0.1%	1
oxidoreductase activity, acting on the CH-NH group of donors, oxygen as acceptor	11 out of 12084 genes, 0.1%	11 out of 19716 genes, 0.1%	1
lysine N-methyltransferase activity	44 out of 12084 genes, 0.4%	56 out of 19716 genes, 0.3%	1
protein-lysine N-methyltransferase activity	44 out of 12084 genes, 0.4%	56 out of 19716 genes, 0.3%	1
gated channel activity	156 out of 12084 genes, 1.3%	224 out of 19716 genes, 1.1%	1
guanyl-nucleotide exchange factor activity	92 out of 12084 genes, 0.8%	127 out of 19716 genes, 0.6%	1
nucleic acid binding transcription factor activity	752 out of 12084 genes, 6.2%	1160 out of 19716 genes, 5.9%	1
fatty acid binding	38 out of 12084 genes, 0.3%	48 out of 19716 genes, 0.2%	1
monocarboxylic acid binding	38 out of 12084 genes, 0.3%	48 out of 19716 genes, 0.2%	1
nucleic acid binding	2170 out of 12084 genes, 18.0%	3435 out of 19716 genes, 17.4%	1
transmembrane receptor protein serine/threonine kinase activity	20 out of 12084 genes, 0.2%	23 out of 19716 genes, 0.1%	1
cysteine-type endopeptidase activity	17 out of 12084 genes, 0.1%	19 out of 19716 genes, 0.1%	1
bacterial cell surface binding	10 out of 12084 genes, 0.1%	10 out of 19716 genes, 0.1%	1
receptor signaling protein activity	53 out of 12084 genes, 0.4%	70 out of 19716 genes, 0.4%	1
protein kinase inhibitor activity	25 out of 12084 genes, 0.2%	30 out of 19716 genes, 0.2%	1
kinase inhibitor activity	25 out of 12084 genes, 0.2%	30 out of 19716 genes, 0.2%	1
protein tyrosine phosphatase activity	37 out of 12084 genes, 0.3%	47 out of 19716 genes, 0.2%	1
ribonuclease activity	46 out of 12084 genes, 0.4%	60 out of 19716 genes, 0.3%	1
Ras guanyl-nucleotide exchange factor activity	89 out of 12084 genes, 0.7%	124 out of 19716 genes, 0.6%	1
heparan sulfate sulfotransferase activity	13 out of 12084 genes, 0.1%	14 out of 19716 genes, 0.1%	1
acetylgalactosaminyltransferase activity	34 out of 12084 genes, 0.3%	43 out of 19716 genes, 0.2%	1
cell adhesion molecule binding	29 out of 12084 genes, 0.2%	36 out of 19716 genes, 0.2%	1
N-methyltransferase activity	63 out of 12084 genes, 0.5%	86 out of 19716 genes, 0.4%	1
receptor signaling protein serine/threonine kinase activity	44 out of 12084 genes, 0.4%	58 out of 19716 genes, 0.3%	1
protein binding transcription factor activity	392 out of 12084 genes, 3.2%	597 out of 19716 genes, 3.0%	1
transcription factor binding transcription factor activity	392 out of 12084 genes, 3.2%	597 out of 19716 genes, 3.0%	1
oxidoreductase activity, acting on the CH-NH2 group of donors, oxygen as acceptor	18 out of 12084 genes, 0.1%	21 out of 19716 genes, 0.1%	1
transforming growth factor beta receptor binding	12 out of 12084 genes, 0.1%	13 out of 19716 genes, 0.1%	1
solute:cation antiporter activity	12 out of 12084 genes, 0.1%	13 out of 19716 genes, 0.1%	1
phosphatase activity	240 out of 12084 genes, 2.0%	359 out of 19716 genes, 1.8%	1
acid-thiol ligase activity	15 out of 12084 genes, 0.1%	17 out of 19716 genes, 0.1%	1
phosphatidylinositol 3-kinase activity	15 out of 12084 genes, 0.1%	17 out of 19716 genes, 0.1%	1
inositol trisphosphate phosphatase activity	15 out of 12084 genes, 0.1%	17 out of 19716 genes, 0.1%	1
protein kinase A binding	15 out of 12084 genes, 0.1%	17 out of 19716 genes, 0.1%	1
phospholipid binding	157 out of 12084 genes, 1.3%	230 out of 19716 genes, 1.2%	1
identical protein binding	456 out of 12084 genes, 3.8%	700 out of 19716 genes, 3.6%	1
anion:anion antiporter activity	20 out of 12084 genes, 0.2%	24 out of 19716 genes, 0.1%	1
transmembrane receptor protein tyrosine kinase activity	47 out of 12084 genes, 0.4%	63 out of 19716 genes, 0.3%	1
mRNA binding	55 out of 12084 genes, 0.5%	75 out of 19716 genes, 0.4%	1
endoribonuclease activity	27 out of 12084 genes, 0.2%	34 out of 19716 genes, 0.2%	1
carnitine O-acyltransferase activity	8 out of 12084 genes, 0.1%	8 out of 19716 genes, 0.0%	1
amide transmembrane transporter activity	8 out of 12084 genes, 0.1%	8 out of 19716 genes, 0.0%	1
mitogen-activated protein kinase binding	8 out of 12084 genes, 0.1%	8 out of 19716 genes, 0.0%	1
ATPase activity, coupled	200 out of 12084 genes, 1.7%	298 out of 19716 genes, 1.5%	1
active transmembrane transporter activity	295 out of 12084 genes, 2.4%	447 out of 19716 genes, 2.3%	1
chloride channel activity	22 out of 12084 genes, 0.2%	27 out of 19716 genes, 0.1%	1
mannosidase activity	14 out of 12084 genes, 0.1%	16 out of 19716 genes, 0.1%	1
icosatetraenoic acid binding	14 out of 12084 genes, 0.1%	16 out of 19716 genes, 0.1%	1
ATPase activity	206 out of 12084 genes, 1.7%	308 out of 19716 genes, 1.6%	1
aldehyde dehydrogenase [NAD(P)+] activity	11 out of 12084 genes, 0.1%	12 out of 19716 genes, 0.1%	1
protein histidine kinase activity	11 out of 12084 genes, 0.1%	12 out of 19716 genes, 0.1%	1
solute:hydrogen antiporter activity	11 out of 12084 genes, 0.1%	12 out of 19716 genes, 0.1%	1
phosphotransferase activity, nitrogenous group as acceptor	11 out of 12084 genes, 0.1%	12 out of 19716 genes, 0.1%	1
nucleoside kinase activity	11 out of 12084 genes, 0.1%	12 out of 19716 genes, 0.1%	1
lipoprotein particle receptor binding	19 out of 12084 genes, 0.2%	23 out of 19716 genes, 0.1%	1
S-adenosylmethionine-dependent methyltransferase activity	73 out of 12084 genes, 0.6%	103 out of 19716 genes, 0.5%	1
transferase activity, transferring pentosyl groups	41 out of 12084 genes, 0.3%	55 out of 19716 genes, 0.3%	1
phosphoric diester hydrolase activity	67 out of 12084 genes, 0.6%	94 out of 19716 genes, 0.5%	1
retinoic acid receptor binding	28 out of 12084 genes, 0.2%	36 out of 19716 genes, 0.2%	1
oxidoreductase activity, acting on the CH-NH2 group of donors	21 out of 12084 genes, 0.2%	26 out of 19716 genes, 0.1%	1
phosphatase binding	74 out of 12084 genes, 0.6%	105 out of 19716 genes, 0.5%	1
transferase activity, transferring one-carbon groups	171 out of 12084 genes, 1.4%	255 out of 19716 genes, 1.3%	1
adenylate cyclase activity	7 out of 12084 genes, 0.1%	7 out of 19716 genes, 0.0%	1
phosphorus-oxygen lyase activity	7 out of 12084 genes, 0.1%	7 out of 19716 genes, 0.0%	1
nucleoside-diphosphatase activity	7 out of 12084 genes, 0.1%	7 out of 19716 genes, 0.0%	1
nuclear hormone receptor binding	83 out of 12084 genes, 0.7%	119 out of 19716 genes, 0.6%	1
phospholipase activity	56 out of 12084 genes, 0.5%	78 out of 19716 genes, 0.4%	1
nuclease activity	138 out of 12084 genes, 1.1%	204 out of 19716 genes, 1.0%	1
methyltransferase activity	127 out of 12084 genes, 1.1%	187 out of 19716 genes, 0.9%	1
carbohydrate kinase activity	20 out of 12084 genes, 0.2%	25 out of 19716 genes, 0.1%	1
endonuclease activity	57 out of 12084 genes, 0.5%	80 out of 19716 genes, 0.4%	1
ubiquitin-protein ligase activity	15 out of 12084 genes, 0.1%	18 out of 19716 genes, 0.1%	1
inositol phosphate phosphatase activity	15 out of 12084 genes, 0.1%	18 out of 19716 genes, 0.1%	1
protein serine/threonine/tyrosine kinase activity	17 out of 12084 genes, 0.1%	21 out of 19716 genes, 0.1%	1
low-density lipoprotein particle binding	17 out of 12084 genes, 0.1%	21 out of 19716 genes, 0.1%	1
cyclin-dependent protein kinase regulator activity	12 out of 12084 genes, 0.1%	14 out of 19716 genes, 0.1%	1
protein methyltransferase activity	56 out of 12084 genes, 0.5%	79 out of 19716 genes, 0.4%	1
chloride transmembrane transporter activity	30 out of 12084 genes, 0.2%	40 out of 19716 genes, 0.2%	1
oxidoreductase activity, acting on the aldehyde or oxo group of donors	38 out of 12084 genes, 0.3%	52 out of 19716 genes, 0.3%	1
exoribonuclease activity	6 out of 12084 genes, 0.0%	6 out of 19716 genes, 0.0%	1
MAP kinase kinase activity	6 out of 12084 genes, 0.0%	6 out of 19716 genes, 0.0%	1
nucleoside transmembrane transporter activity	6 out of 12084 genes, 0.0%	6 out of 19716 genes, 0.0%	1
ligase activity, forming phosphoric ester bonds	6 out of 12084 genes, 0.0%	6 out of 19716 genes, 0.0%	1
deoxynucleoside kinase activity	6 out of 12084 genes, 0.0%	6 out of 19716 genes, 0.0%	1
thiolester hydrolase activity	78 out of 12084 genes, 0.6%	113 out of 19716 genes, 0.6%	1
adenosine deaminase activity	9 out of 12084 genes, 0.1%	10 out of 19716 genes, 0.1%	1
monovalent cation:hydrogen antiporter activity	9 out of 12084 genes, 0.1%	10 out of 19716 genes, 0.1%	1
tRNA methyltransferase activity	9 out of 12084 genes, 0.1%	10 out of 19716 genes, 0.1%	1
cation:cation antiporter activity	9 out of 12084 genes, 0.1%	10 out of 19716 genes, 0.1%	1
endoribonuclease activity, producing 5'-phosphomonoesters	9 out of 12084 genes, 0.1%	10 out of 19716 genes, 0.1%	1
deaminase activity	9 out of 12084 genes, 0.1%	10 out of 19716 genes, 0.1%	1
oxidoreductase activity, acting on NADH or NADPH, oxygen as acceptor	9 out of 12084 genes, 0.1%	10 out of 19716 genes, 0.1%	1
N-acetyltransferase activity	61 out of 12084 genes, 0.5%	87 out of 19716 genes, 0.4%	1
lipase activity	59 out of 12084 genes, 0.5%	84 out of 19716 genes, 0.4%	1
icosanoid binding	14 out of 12084 genes, 0.1%	17 out of 19716 genes, 0.1%	1
phosphatidylinositol phosphate phosphatase activity	14 out of 12084 genes, 0.1%	17 out of 19716 genes, 0.1%	1
lysine N-acetyltransferase activity	41 out of 12084 genes, 0.3%	57 out of 19716 genes, 0.3%	1
voltage-gated cation channel activity	58 out of 12084 genes, 0.5%	83 out of 19716 genes, 0.4%	1
ligase activity, forming carbon-nitrogen bonds	294 out of 12084 genes, 2.4%	454 out of 19716 genes, 2.3%	1
inward rectifier potassium channel activity	11 out of 12084 genes, 0.1%	13 out of 19716 genes, 0.1%	1
secondary active transmembrane transporter activity	168 out of 12084 genes, 1.4%	255 out of 19716 genes, 1.3%	1
primary active transmembrane transporter activity	92 out of 12084 genes, 0.8%	136 out of 19716 genes, 0.7%	1
P-P-bond-hydrolysis-driven transmembrane transporter activity	92 out of 12084 genes, 0.8%	136 out of 19716 genes, 0.7%	1
anion channel activity	59 out of 12084 genes, 0.5%	85 out of 19716 genes, 0.4%	1
transcription cofactor activity	350 out of 12084 genes, 2.9%	544 out of 19716 genes, 2.8%	1
endodeoxyribonuclease activity	26 out of 12084 genes, 0.2%	35 out of 19716 genes, 0.2%	1
AMP binding	26 out of 12084 genes, 0.2%	35 out of 19716 genes, 0.2%	1
deoxyribonuclease activity	32 out of 12084 genes, 0.3%	44 out of 19716 genes, 0.2%	1
cell surface binding	30 out of 12084 genes, 0.2%	41 out of 19716 genes, 0.2%	1
O-methyltransferase activity	13 out of 12084 genes, 0.1%	16 out of 19716 genes, 0.1%	1
opioid receptor activity	8 out of 12084 genes, 0.1%	9 out of 19716 genes, 0.0%	1
carbon-nitrogen lyase activity	8 out of 12084 genes, 0.1%	9 out of 19716 genes, 0.0%	1
protein serine/threonine kinase inhibitor activity	15 out of 12084 genes, 0.1%	19 out of 19716 genes, 0.1%	1
opsonin receptor activity	5 out of 12084 genes, 0.0%	5 out of 19716 genes, 0.0%	1
DNA ligase activity	5 out of 12084 genes, 0.0%	5 out of 19716 genes, 0.0%	1
branched-chain-amino-acid transaminase activity	5 out of 12084 genes, 0.0%	5 out of 19716 genes, 0.0%	1
intracellular ligand-gated calcium channel activity	5 out of 12084 genes, 0.0%	5 out of 19716 genes, 0.0%	1
5'-3' exonuclease activity	5 out of 12084 genes, 0.0%	5 out of 19716 genes, 0.0%	1
calcium-release channel activity	5 out of 12084 genes, 0.0%	5 out of 19716 genes, 0.0%	1
trialkylsulfonium hydrolase activity	5 out of 12084 genes, 0.0%	5 out of 19716 genes, 0.0%	1
carbon-oxygen lyase activity, acting on phosphates	5 out of 12084 genes, 0.0%	5 out of 19716 genes, 0.0%	1
cyclohydrolase activity	5 out of 12084 genes, 0.0%	5 out of 19716 genes, 0.0%	1
arsenate reductase activity	5 out of 12084 genes, 0.0%	5 out of 19716 genes, 0.0%	1
oxoglutarate dehydrogenase [NAD(P)+] activity	5 out of 12084 genes, 0.0%	5 out of 19716 genes, 0.0%	1
nucleoside-triphosphate diphosphatase activity	5 out of 12084 genes, 0.0%	5 out of 19716 genes, 0.0%	1
BH domain binding	5 out of 12084 genes, 0.0%	5 out of 19716 genes, 0.0%	1
voltage-gated ion channel activity	69 out of 12084 genes, 0.6%	101 out of 19716 genes, 0.5%	1
voltage-gated channel activity	69 out of 12084 genes, 0.6%	101 out of 19716 genes, 0.5%	1
carboxylic ester hydrolase activity	78 out of 12084 genes, 0.6%	115 out of 19716 genes, 0.6%	1
ligase activity	354 out of 12084 genes, 2.9%	552 out of 19716 genes, 2.8%	1
small conjugating protein ligase activity	239 out of 12084 genes, 2.0%	369 out of 19716 genes, 1.9%	1
endonuclease activity, active with either ribo- or deoxyribonucleic acids and producing 3'-phosphomonoesters	21 out of 12084 genes, 0.2%	28 out of 19716 genes, 0.1%	1
hydrolase activity, acting on carbon-nitrogen (but not peptide) bonds, in cyclic amidines	25 out of 12084 genes, 0.2%	34 out of 19716 genes, 0.2%	1
bioactive lipid receptor activity	10 out of 12084 genes, 0.1%	12 out of 19716 genes, 0.1%	1
acid-amino acid ligase activity	258 out of 12084 genes, 2.1%	400 out of 19716 genes, 2.0%	1
protein complex binding	71 out of 12084 genes, 0.6%	105 out of 19716 genes, 0.5%	1
tRNA-specific ribonuclease activity	12 out of 12084 genes, 0.1%	15 out of 19716 genes, 0.1%	1
exonuclease activity, active with either ribo- or deoxyribonucleic acids and producing 5'-phosphomonoesters	12 out of 12084 genes, 0.1%	15 out of 19716 genes, 0.1%	1
oxidoreductase activity, acting on paired donors, with incorporation or reduction of molecular oxygen, reduced iron-sulfur protein as one donor, and incorporation of one atom of oxygen	14 out of 12084 genes, 0.1%	18 out of 19716 genes, 0.1%	1
oxidoreductase activity, acting on the CH-NH group of donors	28 out of 12084 genes, 0.2%	39 out of 19716 genes, 0.2%	1
oxidoreductase activity, acting on paired donors, with incorporation or reduction of molecular oxygen, NADH or NADPH as one donor, and incorporation of one atom of oxygen	28 out of 12084 genes, 0.2%	39 out of 19716 genes, 0.2%	1
endoribonuclease activity, producing 3'-phosphomonoesters	16 out of 12084 genes, 0.1%	21 out of 19716 genes, 0.1%	1
kinase activator activity	24 out of 12084 genes, 0.2%	33 out of 19716 genes, 0.2%	1
protein kinase activator activity	24 out of 12084 genes, 0.2%	33 out of 19716 genes, 0.2%	1
carboxylesterase activity	63 out of 12084 genes, 0.5%	93 out of 19716 genes, 0.5%	1
nucleobase-containing compound kinase activity	20 out of 12084 genes, 0.2%	27 out of 19716 genes, 0.1%	1
growth factor binding	79 out of 12084 genes, 0.7%	118 out of 19716 genes, 0.6%	1
NADP binding	7 out of 12084 genes, 0.1%	8 out of 19716 genes, 0.0%	1
dopamine receptor binding	7 out of 12084 genes, 0.1%	8 out of 19716 genes, 0.0%	1
N-acyltransferase activity	70 out of 12084 genes, 0.6%	104 out of 19716 genes, 0.5%	1
voltage-gated potassium channel activity	39 out of 12084 genes, 0.3%	56 out of 19716 genes, 0.3%	1
ATPase activity, coupled to transmembrane movement of substances	73 out of 12084 genes, 0.6%	109 out of 19716 genes, 0.6%	1
inorganic anion transmembrane transporter activity	46 out of 12084 genes, 0.4%	67 out of 19716 genes, 0.3%	1
ATPase activity, coupled to transmembrane movement of ions	62 out of 12084 genes, 0.5%	92 out of 19716 genes, 0.5%	1
alpha-mannosidase activity	9 out of 12084 genes, 0.1%	11 out of 19716 genes, 0.1%	1
activin-activated receptor activity	9 out of 12084 genes, 0.1%	11 out of 19716 genes, 0.1%	1
3'-5'-exoribonuclease activity	4 out of 12084 genes, 0.0%	4 out of 19716 genes, 0.0%	1
RNA-directed DNA polymerase activity	4 out of 12084 genes, 0.0%	4 out of 19716 genes, 0.0%	1
asparaginase activity	4 out of 12084 genes, 0.0%	4 out of 19716 genes, 0.0%	1
hexokinase activity	4 out of 12084 genes, 0.0%	4 out of 19716 genes, 0.0%	1
protein kinase C binding	4 out of 12084 genes, 0.0%	4 out of 19716 genes, 0.0%	1
oxidoreductase activity, acting on CH or CH2 groups, disulfide as acceptor	4 out of 12084 genes, 0.0%	4 out of 19716 genes, 0.0%	1
exoribonuclease activity, producing 5'-phosphomonoesters	4 out of 12084 genes, 0.0%	4 out of 19716 genes, 0.0%	1
nucleotide phosphatase activity	4 out of 12084 genes, 0.0%	4 out of 19716 genes, 0.0%	1
receptor signaling complex scaffold activity	4 out of 12084 genes, 0.0%	4 out of 19716 genes, 0.0%	1
adenosine receptor binding	4 out of 12084 genes, 0.0%	4 out of 19716 genes, 0.0%	1
phosphatidylinositol trisphosphate phosphatase activity	4 out of 12084 genes, 0.0%	4 out of 19716 genes, 0.0%	1
Toll-like receptor binding	4 out of 12084 genes, 0.0%	4 out of 19716 genes, 0.0%	1
dynein binding	4 out of 12084 genes, 0.0%	4 out of 19716 genes, 0.0%	1
anion transmembrane transporter activity	114 out of 12084 genes, 0.9%	174 out of 19716 genes, 0.9%	1
steroid hormone receptor binding	58 out of 12084 genes, 0.5%	86 out of 19716 genes, 0.4%	1
Rho GTPase binding	25 out of 12084 genes, 0.2%	35 out of 19716 genes, 0.2%	1
transition metal ion transmembrane transporter activity	25 out of 12084 genes, 0.2%	35 out of 19716 genes, 0.2%	1
phosphatidylinositol bisphosphate phosphatase activity	11 out of 12084 genes, 0.1%	14 out of 19716 genes, 0.1%	1
neurotransmitter binding	11 out of 12084 genes, 0.1%	14 out of 19716 genes, 0.1%	1
sequence-specific DNA binding RNA polymerase II transcription factor activity	110 out of 12084 genes, 0.9%	168 out of 19716 genes, 0.9%	1
nucleotidyltransferase activity	91 out of 12084 genes, 0.8%	138 out of 19716 genes, 0.7%	1
sulfuric ester hydrolase activity	13 out of 12084 genes, 0.1%	17 out of 19716 genes, 0.1%	1
RNA helicase activity	19 out of 12084 genes, 0.2%	26 out of 19716 genes, 0.1%	1
phospholipase A2 activity	15 out of 12084 genes, 0.1%	20 out of 19716 genes, 0.1%	1
RNA methyltransferase activity	15 out of 12084 genes, 0.1%	20 out of 19716 genes, 0.1%	1
snRNA binding	15 out of 12084 genes, 0.1%	20 out of 19716 genes, 0.1%	1
NAD binding	15 out of 12084 genes, 0.1%	20 out of 19716 genes, 0.1%	1
transaminase activity	17 out of 12084 genes, 0.1%	23 out of 19716 genes, 0.1%	1
protein transporter activity	17 out of 12084 genes, 0.1%	23 out of 19716 genes, 0.1%	1
ligand-activated sequence-specific DNA binding RNA polymerase II transcription factor activity	45 out of 12084 genes, 0.4%	66 out of 19716 genes, 0.3%	1
cyclic-nucleotide phosphodiesterase activity	34 out of 12084 genes, 0.3%	49 out of 19716 genes, 0.2%	1
cofactor binding	157 out of 12084 genes, 1.3%	243 out of 19716 genes, 1.2%	1
lipid binding	360 out of 12084 genes, 3.0%	569 out of 19716 genes, 2.9%	1
retinoic acid receptor activity	6 out of 12084 genes, 0.0%	7 out of 19716 genes, 0.0%	1
iron ion transmembrane transporter activity	6 out of 12084 genes, 0.0%	7 out of 19716 genes, 0.0%	1
acyl-CoA desaturase activity	6 out of 12084 genes, 0.0%	7 out of 19716 genes, 0.0%	1
phospholipase C activity	22 out of 12084 genes, 0.2%	31 out of 19716 genes, 0.2%	1
phosphoprotein phosphatase activity	130 out of 12084 genes, 1.1%	201 out of 19716 genes, 1.0%	1
neurotransmitter transporter activity	20 out of 12084 genes, 0.2%	28 out of 19716 genes, 0.1%	1
metalloexopeptidase activity	20 out of 12084 genes, 0.2%	28 out of 19716 genes, 0.1%	1
hydrolase activity, acting on acid anhydrides, catalyzing transmembrane movement of substances	75 out of 12084 genes, 0.6%	114 out of 19716 genes, 0.6%	1
ATPase activity, coupled to movement of substances	75 out of 12084 genes, 0.6%	114 out of 19716 genes, 0.6%	1
double-stranded DNA binding	18 out of 12084 genes, 0.1%	25 out of 19716 genes, 0.1%	1
transforming growth factor beta-activated receptor activity	8 out of 12084 genes, 0.1%	10 out of 19716 genes, 0.1%	1
vascular endothelial growth factor receptor binding	8 out of 12084 genes, 0.1%	10 out of 19716 genes, 0.1%	1
translation termination factor activity	8 out of 12084 genes, 0.1%	10 out of 19716 genes, 0.1%	1
mannosyl-oligosaccharide mannosidase activity	8 out of 12084 genes, 0.1%	10 out of 19716 genes, 0.1%	1
translation regulator activity, nucleic acid binding	8 out of 12084 genes, 0.1%	10 out of 19716 genes, 0.1%	1
phosphofructokinase activity	14 out of 12084 genes, 0.1%	19 out of 19716 genes, 0.1%	1
cytokine binding	10 out of 12084 genes, 0.1%	13 out of 19716 genes, 0.1%	1
3',5'-cyclic-GMP phosphodiesterase activity	10 out of 12084 genes, 0.1%	13 out of 19716 genes, 0.1%	1
glucosidase activity	12 out of 12084 genes, 0.1%	16 out of 19716 genes, 0.1%	1
endonuclease activity, active with either ribo- or deoxyribonucleic acids and producing 5'-phosphomonoesters	12 out of 12084 genes, 0.1%	16 out of 19716 genes, 0.1%	1
hormone receptor binding	95 out of 12084 genes, 0.8%	146 out of 19716 genes, 0.7%	1
oxidoreductase activity, acting on the aldehyde or oxo group of donors, NAD or NADP as acceptor	25 out of 12084 genes, 0.2%	36 out of 19716 genes, 0.2%	1
acetyltransferase activity	79 out of 12084 genes, 0.7%	121 out of 19716 genes, 0.6%	1
3',5'-cyclic-nucleotide phosphodiesterase activity	32 out of 12084 genes, 0.3%	47 out of 19716 genes, 0.2%	1
voltage-gated calcium channel activity	19 out of 12084 genes, 0.2%	27 out of 19716 genes, 0.1%	1
adenylyltransferase activity	19 out of 12084 genes, 0.2%	27 out of 19716 genes, 0.1%	1
RNA polymerase activity	28 out of 12084 genes, 0.2%	41 out of 19716 genes, 0.2%	1
sialyltransferase activity	17 out of 12084 genes, 0.1%	24 out of 19716 genes, 0.1%	1
dystroglycan binding	3 out of 12084 genes, 0.0%	3 out of 19716 genes, 0.0%	1
microtubule motor activity	3 out of 12084 genes, 0.0%	3 out of 19716 genes, 0.0%	1
methylenetetrahydrofolate dehydrogenase [NAD(P)+] activity	3 out of 12084 genes, 0.0%	3 out of 19716 genes, 0.0%	1
sulfate adenylyltransferase activity	3 out of 12084 genes, 0.0%	3 out of 19716 genes, 0.0%	1
copper ion transmembrane transporter activity	3 out of 12084 genes, 0.0%	3 out of 19716 genes, 0.0%	1
glycerol transmembrane transporter activity	3 out of 12084 genes, 0.0%	3 out of 19716 genes, 0.0%	1
hydrogen ion channel activity	3 out of 12084 genes, 0.0%	3 out of 19716 genes, 0.0%	1
tRNA (adenine) methyltransferase activity	3 out of 12084 genes, 0.0%	3 out of 19716 genes, 0.0%	1
oxidoreductase activity, acting on a sulfur group of donors, NAD or NADP as acceptor	3 out of 12084 genes, 0.0%	3 out of 19716 genes, 0.0%	1
amidine-lyase activity	3 out of 12084 genes, 0.0%	3 out of 19716 genes, 0.0%	1
interleukin-12 binding	3 out of 12084 genes, 0.0%	3 out of 19716 genes, 0.0%	1
lipid antigen binding	3 out of 12084 genes, 0.0%	3 out of 19716 genes, 0.0%	1
polyubiquitin binding	3 out of 12084 genes, 0.0%	3 out of 19716 genes, 0.0%	1
copper-transporting ATPase activity	3 out of 12084 genes, 0.0%	3 out of 19716 genes, 0.0%	1
quinone binding	3 out of 12084 genes, 0.0%	3 out of 19716 genes, 0.0%	1
poly-purine tract binding	3 out of 12084 genes, 0.0%	3 out of 19716 genes, 0.0%	1
lipopeptide binding	3 out of 12084 genes, 0.0%	3 out of 19716 genes, 0.0%	1
glycoprotein binding	15 out of 12084 genes, 0.1%	21 out of 19716 genes, 0.1%	1
dicarboxylic acid transmembrane transporter activity	13 out of 12084 genes, 0.1%	18 out of 19716 genes, 0.1%	1
channel regulator activity	74 out of 12084 genes, 0.6%	114 out of 19716 genes, 0.6%	1
protein phosphatase binding	38 out of 12084 genes, 0.3%	57 out of 19716 genes, 0.3%	1
pattern binding	154 out of 12084 genes, 1.3%	242 out of 19716 genes, 1.2%	1
histone demethylase activity	11 out of 12084 genes, 0.1%	15 out of 19716 genes, 0.1%	1
ribonucleoprotein complex binding	43 out of 12084 genes, 0.4%	65 out of 19716 genes, 0.3%	1
ligase activity, forming carbon-sulfur bonds	29 out of 12084 genes, 0.2%	43 out of 19716 genes, 0.2%	1
glucose transmembrane transporter activity	9 out of 12084 genes, 0.1%	12 out of 19716 genes, 0.1%	1
sulfur amino acid transmembrane transporter activity	5 out of 12084 genes, 0.0%	6 out of 19716 genes, 0.0%	1
single-stranded DNA binding	5 out of 12084 genes, 0.0%	6 out of 19716 genes, 0.0%	1
anaphylatoxin receptor activity	5 out of 12084 genes, 0.0%	6 out of 19716 genes, 0.0%	1
neuropeptide Y receptor activity	5 out of 12084 genes, 0.0%	6 out of 19716 genes, 0.0%	1
insulin-like growth factor binding	5 out of 12084 genes, 0.0%	6 out of 19716 genes, 0.0%	1
galactosidase activity	5 out of 12084 genes, 0.0%	6 out of 19716 genes, 0.0%	1
malate dehydrogenase activity	5 out of 12084 genes, 0.0%	6 out of 19716 genes, 0.0%	1
pyrimidine nucleotide binding	5 out of 12084 genes, 0.0%	6 out of 19716 genes, 0.0%	1
immunoglobulin binding	5 out of 12084 genes, 0.0%	6 out of 19716 genes, 0.0%	1
protein tyrosine kinase activator activity	5 out of 12084 genes, 0.0%	6 out of 19716 genes, 0.0%	1
histone kinase activity	5 out of 12084 genes, 0.0%	6 out of 19716 genes, 0.0%	1
histone-arginine N-methyltransferase activity	7 out of 12084 genes, 0.1%	9 out of 19716 genes, 0.0%	1
thyroid hormone receptor activator activity	7 out of 12084 genes, 0.1%	9 out of 19716 genes, 0.0%	1
oxidoreductase activity, acting on the aldehyde or oxo group of donors, disulfide as acceptor	7 out of 12084 genes, 0.1%	9 out of 19716 genes, 0.0%	1
diphosphotransferase activity	7 out of 12084 genes, 0.1%	9 out of 19716 genes, 0.0%	1
receptor serine/threonine kinase binding	7 out of 12084 genes, 0.1%	9 out of 19716 genes, 0.0%	1
neurotrophin binding	7 out of 12084 genes, 0.1%	9 out of 19716 genes, 0.0%	1
transmembrane receptor protein serine/threonine kinase binding	7 out of 12084 genes, 0.1%	9 out of 19716 genes, 0.0%	1
growth factor receptor binding	53 out of 12084 genes, 0.4%	81 out of 19716 genes, 0.4%	1
ligand-gated ion channel activity	75 out of 12084 genes, 0.6%	116 out of 19716 genes, 0.6%	1
ligand-gated channel activity	75 out of 12084 genes, 0.6%	116 out of 19716 genes, 0.6%	1
drug binding	25 out of 12084 genes, 0.2%	37 out of 19716 genes, 0.2%	1
glycosaminoglycan binding	124 out of 12084 genes, 1.0%	195 out of 19716 genes, 1.0%	1
intracellular ligand-gated ion channel activity	14 out of 12084 genes, 0.1%	20 out of 19716 genes, 0.1%	1
fatty acid ligase activity	14 out of 12084 genes, 0.1%	20 out of 19716 genes, 0.1%	1
hexosaminidase activity	14 out of 12084 genes, 0.1%	20 out of 19716 genes, 0.1%	1
small conjugating protein binding	45 out of 12084 genes, 0.4%	69 out of 19716 genes, 0.3%	1
amino acid transmembrane transporter activity	50 out of 12084 genes, 0.4%	77 out of 19716 genes, 0.4%	1
phosphatase regulator activity	50 out of 12084 genes, 0.4%	77 out of 19716 genes, 0.4%	1
cis-trans isomerase activity	33 out of 12084 genes, 0.3%	50 out of 19716 genes, 0.3%	1
exonuclease activity	38 out of 12084 genes, 0.3%	58 out of 19716 genes, 0.3%	1
lipid kinase activity	10 out of 12084 genes, 0.1%	14 out of 19716 genes, 0.1%	1
sodium:amino acid symporter activity	10 out of 12084 genes, 0.1%	14 out of 19716 genes, 0.1%	1
glutamate receptor binding	29 out of 12084 genes, 0.2%	44 out of 19716 genes, 0.2%	1
lyase activity	112 out of 12084 genes, 0.9%	177 out of 19716 genes, 0.9%	1
exodeoxyribonuclease activity	8 out of 12084 genes, 0.1%	11 out of 19716 genes, 0.1%	1
icosanoid receptor activity	8 out of 12084 genes, 0.1%	11 out of 19716 genes, 0.1%	1
prostanoid receptor activity	8 out of 12084 genes, 0.1%	11 out of 19716 genes, 0.1%	1
cation:sugar symporter activity	8 out of 12084 genes, 0.1%	11 out of 19716 genes, 0.1%	1
pattern recognition receptor activity	8 out of 12084 genes, 0.1%	11 out of 19716 genes, 0.1%	1
exodeoxyribonuclease activity, producing 5'-phosphomonoesters	8 out of 12084 genes, 0.1%	11 out of 19716 genes, 0.1%	1
cysteine-type peptidase activity	57 out of 12084 genes, 0.5%	89 out of 19716 genes, 0.5%	1
coenzyme binding	85 out of 12084 genes, 0.7%	134 out of 19716 genes, 0.7%	1
MAP kinase activity	6 out of 12084 genes, 0.0%	8 out of 19716 genes, 0.0%	1
ephrin receptor activity	6 out of 12084 genes, 0.0%	8 out of 19716 genes, 0.0%	1
fibroblast growth factor receptor binding	6 out of 12084 genes, 0.0%	8 out of 19716 genes, 0.0%	1
oxidoreductase activity, acting on paired donors, with oxidation of a pair of donors resulting in the reduction of molecular oxygen to two molecules of water	6 out of 12084 genes, 0.0%	8 out of 19716 genes, 0.0%	1
SAP kinase activity	6 out of 12084 genes, 0.0%	8 out of 19716 genes, 0.0%	1
fibroblast growth factor binding	6 out of 12084 genes, 0.0%	8 out of 19716 genes, 0.0%	1
actinin binding	6 out of 12084 genes, 0.0%	8 out of 19716 genes, 0.0%	1
alcohol binding	6 out of 12084 genes, 0.0%	8 out of 19716 genes, 0.0%	1
myosin binding	13 out of 12084 genes, 0.1%	19 out of 19716 genes, 0.1%	1
polysaccharide binding	143 out of 12084 genes, 1.2%	228 out of 19716 genes, 1.2%	1
opsonin binding	4 out of 12084 genes, 0.0%	5 out of 19716 genes, 0.0%	1
histone acetyltransferase activity	4 out of 12084 genes, 0.0%	5 out of 19716 genes, 0.0%	1
dopamine receptor activity	4 out of 12084 genes, 0.0%	5 out of 19716 genes, 0.0%	1
nucleobase transmembrane transporter activity	4 out of 12084 genes, 0.0%	5 out of 19716 genes, 0.0%	1
outward rectifier potassium channel activity	4 out of 12084 genes, 0.0%	5 out of 19716 genes, 0.0%	1
oxidoreductase activity, acting on the CH-NH group of donors, quinone or similar compound as acceptor	4 out of 12084 genes, 0.0%	5 out of 19716 genes, 0.0%	1
ammonia-lyase activity	4 out of 12084 genes, 0.0%	5 out of 19716 genes, 0.0%	1
carbon-nitrogen ligase activity, with glutamine as amido-N-donor	4 out of 12084 genes, 0.0%	5 out of 19716 genes, 0.0%	1
metallopeptidase activity	28 out of 12084 genes, 0.2%	43 out of 19716 genes, 0.2%	1
cyclase activity	28 out of 12084 genes, 0.2%	43 out of 19716 genes, 0.2%	1
hydrogen ion transmembrane transporter activity	28 out of 12084 genes, 0.2%	43 out of 19716 genes, 0.2%	1
protein phosphatase regulator activity	33 out of 12084 genes, 0.3%	51 out of 19716 genes, 0.3%	1
succinate dehydrogenase activity	2 out of 12084 genes, 0.0%	2 out of 19716 genes, 0.0%	1
microfilament motor activity	2 out of 12084 genes, 0.0%	2 out of 19716 genes, 0.0%	1
RNA cap binding	2 out of 12084 genes, 0.0%	2 out of 19716 genes, 0.0%	1
phorbol ester receptor activity	2 out of 12084 genes, 0.0%	2 out of 19716 genes, 0.0%	1
dopamine receptor activity, coupled via Gs	2 out of 12084 genes, 0.0%	2 out of 19716 genes, 0.0%	1
interleukin-33 binding	2 out of 12084 genes, 0.0%	2 out of 19716 genes, 0.0%	1
alcohol dehydrogenase (NAD) activity	2 out of 12084 genes, 0.0%	2 out of 19716 genes, 0.0%	1
dihydroorotate dehydrogenase activity	2 out of 12084 genes, 0.0%	2 out of 19716 genes, 0.0%	1
farnesyltranstransferase activity	2 out of 12084 genes, 0.0%	2 out of 19716 genes, 0.0%	1
phosphoenolpyruvate carboxykinase activity	2 out of 12084 genes, 0.0%	2 out of 19716 genes, 0.0%	1
phosphoglycerate mutase activity	2 out of 12084 genes, 0.0%	2 out of 19716 genes, 0.0%	1
saccharopine dehydrogenase activity	2 out of 12084 genes, 0.0%	2 out of 19716 genes, 0.0%	1
nuclear export signal receptor activity	2 out of 12084 genes, 0.0%	2 out of 19716 genes, 0.0%	1
sugar:hydrogen symporter activity	2 out of 12084 genes, 0.0%	2 out of 19716 genes, 0.0%	1
NAD(P)+ transhydrogenase activity	2 out of 12084 genes, 0.0%	2 out of 19716 genes, 0.0%	1
H4 histone acetyltransferase activity	2 out of 12084 genes, 0.0%	2 out of 19716 genes, 0.0%	1
L-ascorbic acid transporter activity	2 out of 12084 genes, 0.0%	2 out of 19716 genes, 0.0%	1
acyl-[acyl-carrier-protein] hydrolase activity	2 out of 12084 genes, 0.0%	2 out of 19716 genes, 0.0%	1
tRNA (cytosine) methyltransferase activity	2 out of 12084 genes, 0.0%	2 out of 19716 genes, 0.0%	1
oxidoreductase activity, acting on the CH-CH group of donors, quinone or related compound as acceptor	2 out of 12084 genes, 0.0%	2 out of 19716 genes, 0.0%	1
phosphotransferase activity, carboxyl group as acceptor	2 out of 12084 genes, 0.0%	2 out of 19716 genes, 0.0%	1
hydrolase activity, acting on carbon-nitrogen (but not peptide) bonds, in nitriles	2 out of 12084 genes, 0.0%	2 out of 19716 genes, 0.0%	1
thiol oxidase activity	2 out of 12084 genes, 0.0%	2 out of 19716 genes, 0.0%	1
oxygen binding	2 out of 12084 genes, 0.0%	2 out of 19716 genes, 0.0%	1
transmitter-gated ion channel activity	2 out of 12084 genes, 0.0%	2 out of 19716 genes, 0.0%	1
transmitter-gated channel activity	2 out of 12084 genes, 0.0%	2 out of 19716 genes, 0.0%	1
endothelial differentiation G-protein coupled receptor binding	2 out of 12084 genes, 0.0%	2 out of 19716 genes, 0.0%	1
pyrimidine ribonucleotide binding	2 out of 12084 genes, 0.0%	2 out of 19716 genes, 0.0%	1
5'-3' exodeoxyribonuclease activity	2 out of 12084 genes, 0.0%	2 out of 19716 genes, 0.0%	1
histone tyrosine kinase activity	2 out of 12084 genes, 0.0%	2 out of 19716 genes, 0.0%	1
CXCR chemokine receptor binding	2 out of 12084 genes, 0.0%	2 out of 19716 genes, 0.0%	1
alanine-oxo-acid transaminase activity	2 out of 12084 genes, 0.0%	2 out of 19716 genes, 0.0%	1
ribosylpyrimidine nucleosidase activity	2 out of 12084 genes, 0.0%	2 out of 19716 genes, 0.0%	1
ligase inhibitor activity	2 out of 12084 genes, 0.0%	2 out of 19716 genes, 0.0%	1
tyrosyl-DNA phosphodiesterase activity	2 out of 12084 genes, 0.0%	2 out of 19716 genes, 0.0%	1
lysophospholipid acyltransferase activity	2 out of 12084 genes, 0.0%	2 out of 19716 genes, 0.0%	1
sodium channel activity	16 out of 12084 genes, 0.1%	24 out of 19716 genes, 0.1%	1
oxidoreductase activity, acting on paired donors, with incorporation or reduction of molecular oxygen, 2-oxoglutarate as one donor, and incorporation of one atom each of oxygen into both donors	36 out of 12084 genes, 0.3%	56 out of 19716 genes, 0.3%	1
protein binding, bridging	67 out of 12084 genes, 0.6%	106 out of 19716 genes, 0.5%	1
sterol transporter activity	9 out of 12084 genes, 0.1%	13 out of 19716 genes, 0.1%	1
DNA polymerase activity	29 out of 12084 genes, 0.2%	45 out of 19716 genes, 0.2%	1
chromatin binding	19 out of 12084 genes, 0.2%	29 out of 19716 genes, 0.1%	1
anion binding	19 out of 12084 genes, 0.2%	29 out of 19716 genes, 0.1%	1
cytokine activity	40 out of 12084 genes, 0.3%	63 out of 19716 genes, 0.3%	1
cation-transporting ATPase activity	22 out of 12084 genes, 0.2%	34 out of 19716 genes, 0.2%	1
actin binding	74 out of 12084 genes, 0.6%	118 out of 19716 genes, 0.6%	1
acyl-CoA dehydrogenase activity	7 out of 12084 genes, 0.1%	10 out of 19716 genes, 0.1%	1
calmodulin-dependent protein kinase activity	7 out of 12084 genes, 0.1%	10 out of 19716 genes, 0.1%	1
clathrin binding	7 out of 12084 genes, 0.1%	10 out of 19716 genes, 0.1%	1
opioid receptor binding	7 out of 12084 genes, 0.1%	10 out of 19716 genes, 0.1%	1
sphingolipid binding	7 out of 12084 genes, 0.1%	10 out of 19716 genes, 0.1%	1
cofactor transporter activity	7 out of 12084 genes, 0.1%	10 out of 19716 genes, 0.1%	1
sequence-specific DNA binding transcription factor activity	114 out of 12084 genes, 0.9%	183 out of 19716 genes, 0.9%	1
extracellular ligand-gated ion channel activity	43 out of 12084 genes, 0.4%	68 out of 19716 genes, 0.3%	1
binding, bridging	70 out of 12084 genes, 0.6%	112 out of 19716 genes, 0.6%	1
phosphatidylinositol phosphate kinase activity	10 out of 12084 genes, 0.1%	15 out of 19716 genes, 0.1%	1
racemase and epimerase activity	10 out of 12084 genes, 0.1%	15 out of 19716 genes, 0.1%	1
nucleobase binding	5 out of 12084 genes, 0.0%	7 out of 19716 genes, 0.0%	1
lactate dehydrogenase activity	5 out of 12084 genes, 0.0%	7 out of 19716 genes, 0.0%	1
alpha-glucosidase activity	5 out of 12084 genes, 0.0%	7 out of 19716 genes, 0.0%	1
pyrimidine nucleotide sugar transmembrane transporter activity	5 out of 12084 genes, 0.0%	7 out of 19716 genes, 0.0%	1
palmitoyltransferase activity	5 out of 12084 genes, 0.0%	7 out of 19716 genes, 0.0%	1
endodeoxyribonuclease activity, producing 3'-phosphomonoesters	5 out of 12084 genes, 0.0%	7 out of 19716 genes, 0.0%	1
inhibin binding	5 out of 12084 genes, 0.0%	7 out of 19716 genes, 0.0%	1
transferase activity, transferring acyl groups, acyl groups converted into alkyl on transfer	5 out of 12084 genes, 0.0%	7 out of 19716 genes, 0.0%	1
androsterone dehydrogenase activity	5 out of 12084 genes, 0.0%	7 out of 19716 genes, 0.0%	1
fructose binding	5 out of 12084 genes, 0.0%	7 out of 19716 genes, 0.0%	1
O-acyltransferase activity	31 out of 12084 genes, 0.3%	49 out of 19716 genes, 0.2%	1
histone binding	31 out of 12084 genes, 0.3%	49 out of 19716 genes, 0.2%	1
GMP binding	13 out of 12084 genes, 0.1%	20 out of 19716 genes, 0.1%	1
wide pore channel activity	21 out of 12084 genes, 0.2%	33 out of 19716 genes, 0.2%	1
sodium ion transmembrane transporter activity	56 out of 12084 genes, 0.5%	90 out of 19716 genes, 0.5%	1
hydrolase activity, hydrolyzing O-glycosyl compounds	65 out of 12084 genes, 0.5%	105 out of 19716 genes, 0.5%	1
cation:amino acid symporter activity	11 out of 12084 genes, 0.1%	17 out of 19716 genes, 0.1%	1
vitamin binding	38 out of 12084 genes, 0.3%	61 out of 19716 genes, 0.3%	1
inositol hexakisphosphate kinase activity	3 out of 12084 genes, 0.0%	4 out of 19716 genes, 0.0%	1
complement binding	3 out of 12084 genes, 0.0%	4 out of 19716 genes, 0.0%	1
translation release factor activity	3 out of 12084 genes, 0.0%	4 out of 19716 genes, 0.0%	1
DNA-directed RNA polymerase activity	3 out of 12084 genes, 0.0%	4 out of 19716 genes, 0.0%	1
malic enzyme activity	3 out of 12084 genes, 0.0%	4 out of 19716 genes, 0.0%	1
pyruvate dehydrogenase activity	3 out of 12084 genes, 0.0%	4 out of 19716 genes, 0.0%	1
death receptor binding	3 out of 12084 genes, 0.0%	4 out of 19716 genes, 0.0%	1
purine nucleobase transmembrane transporter activity	3 out of 12084 genes, 0.0%	4 out of 19716 genes, 0.0%	1
serine-type peptidase activity	3 out of 12084 genes, 0.0%	4 out of 19716 genes, 0.0%	1
aromatic amino acid transmembrane transporter activity	3 out of 12084 genes, 0.0%	4 out of 19716 genes, 0.0%	1
C4-dicarboxylate transmembrane transporter activity	3 out of 12084 genes, 0.0%	4 out of 19716 genes, 0.0%	1
inositol bisphosphate phosphatase activity	3 out of 12084 genes, 0.0%	4 out of 19716 genes, 0.0%	1
oxidoreductase activity, acting on the aldehyde or oxo group of donors, oxygen as acceptor	3 out of 12084 genes, 0.0%	4 out of 19716 genes, 0.0%	1
oxidoreductase activity, acting on paired donors, with incorporation or reduction of molecular oxygen, reduced ascorbate as one donor, and incorporation of one atom of oxygen	3 out of 12084 genes, 0.0%	4 out of 19716 genes, 0.0%	1
succinyltransferase activity	3 out of 12084 genes, 0.0%	4 out of 19716 genes, 0.0%	1
sulfurtransferase activity	3 out of 12084 genes, 0.0%	4 out of 19716 genes, 0.0%	1
serine hydrolase activity	3 out of 12084 genes, 0.0%	4 out of 19716 genes, 0.0%	1
ADP-sugar diphosphatase activity	3 out of 12084 genes, 0.0%	4 out of 19716 genes, 0.0%	1
nucleotide kinase activity	3 out of 12084 genes, 0.0%	4 out of 19716 genes, 0.0%	1
steroid dehydrogenase activity, acting on the CH-CH group of donors	3 out of 12084 genes, 0.0%	4 out of 19716 genes, 0.0%	1
bisphosphoglycerate phosphatase activity	3 out of 12084 genes, 0.0%	4 out of 19716 genes, 0.0%	1
histone threonine kinase activity	3 out of 12084 genes, 0.0%	4 out of 19716 genes, 0.0%	1
alpha-actinin binding	3 out of 12084 genes, 0.0%	4 out of 19716 genes, 0.0%	1
modified amino acid transmembrane transporter activity	3 out of 12084 genes, 0.0%	4 out of 19716 genes, 0.0%	1
cysteine-type endopeptidase inhibitor activity	22 out of 12084 genes, 0.2%	35 out of 19716 genes, 0.2%	1
amine transmembrane transporter activity	71 out of 12084 genes, 0.6%	115 out of 19716 genes, 0.6%	1
microtubule binding	14 out of 12084 genes, 0.1%	22 out of 19716 genes, 0.1%	1
channel inhibitor activity	14 out of 12084 genes, 0.1%	22 out of 19716 genes, 0.1%	1
peroxidase activity	17 out of 12084 genes, 0.1%	27 out of 19716 genes, 0.1%	1
steroid hydroxylase activity	17 out of 12084 genes, 0.1%	27 out of 19716 genes, 0.1%	1
oxidoreductase activity, acting on peroxide as acceptor	17 out of 12084 genes, 0.1%	27 out of 19716 genes, 0.1%	1
vitamin transporter activity	17 out of 12084 genes, 0.1%	27 out of 19716 genes, 0.1%	1
nucleoside binding	6 out of 12084 genes, 0.0%	9 out of 19716 genes, 0.0%	1
prostaglandin receptor activity	6 out of 12084 genes, 0.0%	9 out of 19716 genes, 0.0%	1
racemase and epimerase activity, acting on carbohydrates and derivatives	6 out of 12084 genes, 0.0%	9 out of 19716 genes, 0.0%	1
translation initiation factor binding	6 out of 12084 genes, 0.0%	9 out of 19716 genes, 0.0%	1
exopeptidase activity	61 out of 12084 genes, 0.5%	99 out of 19716 genes, 0.5%	1
carboxylic acid transmembrane transporter activity	75 out of 12084 genes, 0.6%	122 out of 19716 genes, 0.6%	1
protein tyrosine/serine/threonine phosphatase activity	9 out of 12084 genes, 0.1%	14 out of 19716 genes, 0.1%	1
arginine N-methyltransferase activity	9 out of 12084 genes, 0.1%	14 out of 19716 genes, 0.1%	1
protein-arginine N-methyltransferase activity	9 out of 12084 genes, 0.1%	14 out of 19716 genes, 0.1%	1
intramolecular oxidoreductase activity, interconverting aldoses and ketoses	9 out of 12084 genes, 0.1%	14 out of 19716 genes, 0.1%	1
iron-sulfur cluster binding	37 out of 12084 genes, 0.3%	60 out of 19716 genes, 0.3%	1
alkali metal ion binding	12 out of 12084 genes, 0.1%	19 out of 19716 genes, 0.1%	1
chemokine receptor binding	12 out of 12084 genes, 0.1%	19 out of 19716 genes, 0.1%	1
carboxy-lyase activity	18 out of 12084 genes, 0.1%	29 out of 19716 genes, 0.1%	1
SMAD binding	21 out of 12084 genes, 0.2%	34 out of 19716 genes, 0.2%	1
peptide hormone binding	7 out of 12084 genes, 0.1%	11 out of 19716 genes, 0.1%	1
CDP-alcohol phosphatidyltransferase activity	7 out of 12084 genes, 0.1%	11 out of 19716 genes, 0.1%	1
peptide N-acetyltransferase activity	7 out of 12084 genes, 0.1%	11 out of 19716 genes, 0.1%	1
ion channel inhibitor activity	10 out of 12084 genes, 0.1%	16 out of 19716 genes, 0.1%	1
proteoglycan binding	10 out of 12084 genes, 0.1%	16 out of 19716 genes, 0.1%	1
S-methyltransferase activity	4 out of 12084 genes, 0.0%	6 out of 19716 genes, 0.0%	1
peptide disulfide oxidoreductase activity	4 out of 12084 genes, 0.0%	6 out of 19716 genes, 0.0%	1
basic amino acid transmembrane transporter activity	4 out of 12084 genes, 0.0%	6 out of 19716 genes, 0.0%	1
fatty acid transporter activity	4 out of 12084 genes, 0.0%	6 out of 19716 genes, 0.0%	1
acetylcholine receptor activity	4 out of 12084 genes, 0.0%	6 out of 19716 genes, 0.0%	1
G-protein coupled acetylcholine receptor activity	4 out of 12084 genes, 0.0%	6 out of 19716 genes, 0.0%	1
laminin binding	4 out of 12084 genes, 0.0%	6 out of 19716 genes, 0.0%	1
extracellular matrix binding	4 out of 12084 genes, 0.0%	6 out of 19716 genes, 0.0%	1
guanylyltransferase activity	4 out of 12084 genes, 0.0%	6 out of 19716 genes, 0.0%	1
helicase activity	53 out of 12084 genes, 0.4%	87 out of 19716 genes, 0.4%	1
macrolide binding	16 out of 12084 genes, 0.1%	26 out of 19716 genes, 0.1%	1
carbohydrate binding	292 out of 12084 genes, 2.4%	479 out of 19716 genes, 2.4%	1
guanyl nucleotide binding	297 out of 12084 genes, 2.5%	488 out of 19716 genes, 2.5%	1
transcription coactivator activity	46 out of 12084 genes, 0.4%	76 out of 19716 genes, 0.4%	1
lipid transporter activity	46 out of 12084 genes, 0.4%	76 out of 19716 genes, 0.4%	1
sugar transmembrane transporter activity	17 out of 12084 genes, 0.1%	28 out of 19716 genes, 0.1%	1
demethylase activity	11 out of 12084 genes, 0.1%	18 out of 19716 genes, 0.1%	1
aldo-keto reductase (NADP) activity	8 out of 12084 genes, 0.1%	13 out of 19716 genes, 0.1%	1
hydrolase activity, acting on ether bonds	8 out of 12084 genes, 0.1%	13 out of 19716 genes, 0.1%	1
adrenergic receptor binding	8 out of 12084 genes, 0.1%	13 out of 19716 genes, 0.1%	1
hydrolase activity, acting on glycosyl bonds	81 out of 12084 genes, 0.7%	134 out of 19716 genes, 0.7%	1
oxidoreductase activity, acting on the CH-CH group of donors	38 out of 12084 genes, 0.3%	63 out of 19716 genes, 0.3%	1
transforming growth factor beta receptor, cytoplasmic mediator activity	5 out of 12084 genes, 0.0%	8 out of 19716 genes, 0.0%	1
alcohol transmembrane transporter activity	5 out of 12084 genes, 0.0%	8 out of 19716 genes, 0.0%	1
ligase activity, forming carbon-carbon bonds	5 out of 12084 genes, 0.0%	8 out of 19716 genes, 0.0%	1
lipoprotein particle receptor activity	5 out of 12084 genes, 0.0%	8 out of 19716 genes, 0.0%	1
UDP-glucosyltransferase activity	5 out of 12084 genes, 0.0%	8 out of 19716 genes, 0.0%	1
cargo receptor activity	5 out of 12084 genes, 0.0%	8 out of 19716 genes, 0.0%	1
organic acid transmembrane transporter activity	82 out of 12084 genes, 0.7%	136 out of 19716 genes, 0.7%	1
transferase activity, transferring nitrogenous groups	24 out of 12084 genes, 0.2%	40 out of 19716 genes, 0.2%	1
nucleobase-containing compound transmembrane transporter activity	18 out of 12084 genes, 0.1%	30 out of 19716 genes, 0.2%	1
excitatory extracellular ligand-gated ion channel activity	36 out of 12084 genes, 0.3%	60 out of 19716 genes, 0.3%	1
guanyl ribonucleotide binding	294 out of 12084 genes, 2.4%	485 out of 19716 genes, 2.5%	1
potassium-transporting ATPase activity	9 out of 12084 genes, 0.1%	15 out of 19716 genes, 0.1%	1
enzyme inhibitor activity	220 out of 12084 genes, 1.8%	364 out of 19716 genes, 1.8%	1
transferase activity, transferring alkyl or aryl (other than methyl) groups	40 out of 12084 genes, 0.3%	67 out of 19716 genes, 0.3%	1
carbon-oxygen lyase activity	43 out of 12084 genes, 0.4%	72 out of 19716 genes, 0.4%	1
carbohydrate transmembrane transporter activity	22 out of 12084 genes, 0.2%	37 out of 19716 genes, 0.2%	1
translation regulator activity	22 out of 12084 genes, 0.2%	37 out of 19716 genes, 0.2%	1
cytokine receptor activity	52 out of 12084 genes, 0.4%	87 out of 19716 genes, 0.4%	1
cyclic nucleotide-dependent protein kinase activity	6 out of 12084 genes, 0.0%	10 out of 19716 genes, 0.1%	1
glucuronosyltransferase activity	6 out of 12084 genes, 0.0%	10 out of 19716 genes, 0.1%	1
dopamine receptor activity, coupled via Gi/Go	2 out of 12084 genes, 0.0%	3 out of 19716 genes, 0.0%	1
damaged DNA binding	2 out of 12084 genes, 0.0%	3 out of 19716 genes, 0.0%	1
nucleotide diphosphatase activity	2 out of 12084 genes, 0.0%	3 out of 19716 genes, 0.0%	1
beta-N-acetylhexosaminidase activity	2 out of 12084 genes, 0.0%	3 out of 19716 genes, 0.0%	1
phosphorylase activity	2 out of 12084 genes, 0.0%	3 out of 19716 genes, 0.0%	1
creatine transporter activity	2 out of 12084 genes, 0.0%	3 out of 19716 genes, 0.0%	1
neurotransmitter:sodium symporter activity	2 out of 12084 genes, 0.0%	3 out of 19716 genes, 0.0%	1
collagen binding	2 out of 12084 genes, 0.0%	3 out of 19716 genes, 0.0%	1
RNA guanylyltransferase activity	2 out of 12084 genes, 0.0%	3 out of 19716 genes, 0.0%	1
rRNA methyltransferase activity	2 out of 12084 genes, 0.0%	3 out of 19716 genes, 0.0%	1
cyclase activator activity	2 out of 12084 genes, 0.0%	3 out of 19716 genes, 0.0%	1
secondary active oligopeptide transmembrane transporter activity	2 out of 12084 genes, 0.0%	3 out of 19716 genes, 0.0%	1
phospholipase activator activity	2 out of 12084 genes, 0.0%	3 out of 19716 genes, 0.0%	1
ammonia ligase activity	2 out of 12084 genes, 0.0%	3 out of 19716 genes, 0.0%	1
tRNA (guanine) methyltransferase activity	2 out of 12084 genes, 0.0%	3 out of 19716 genes, 0.0%	1
metallochaperone activity	2 out of 12084 genes, 0.0%	3 out of 19716 genes, 0.0%	1
copper chaperone activity	2 out of 12084 genes, 0.0%	3 out of 19716 genes, 0.0%	1
oxidoreductase activity, acting on NADH or NADPH, NAD or NADP as acceptor	2 out of 12084 genes, 0.0%	3 out of 19716 genes, 0.0%	1
oxidoreductase activity, acting on paired donors, with incorporation or reduction of molecular oxygen, another compound as one donor, and incorporation of one atom of oxygen	2 out of 12084 genes, 0.0%	3 out of 19716 genes, 0.0%	1
oxidoreductase activity, oxidizing metal ions, oxygen as acceptor	2 out of 12084 genes, 0.0%	3 out of 19716 genes, 0.0%	1
N-succinyltransferase activity	2 out of 12084 genes, 0.0%	3 out of 19716 genes, 0.0%	1
racemase and epimerase activity, acting on amino acids and derivatives	2 out of 12084 genes, 0.0%	3 out of 19716 genes, 0.0%	1
acid-ammonia (or amide) ligase activity	2 out of 12084 genes, 0.0%	3 out of 19716 genes, 0.0%	1
sodium:dicarboxylate symporter activity	2 out of 12084 genes, 0.0%	3 out of 19716 genes, 0.0%	1
C-X-C chemokine binding	2 out of 12084 genes, 0.0%	3 out of 19716 genes, 0.0%	1
guanylate cyclase regulator activity	2 out of 12084 genes, 0.0%	3 out of 19716 genes, 0.0%	1
guanylate cyclase activator activity	2 out of 12084 genes, 0.0%	3 out of 19716 genes, 0.0%	1
filamin binding	2 out of 12084 genes, 0.0%	3 out of 19716 genes, 0.0%	1
single base insertion or deletion binding	2 out of 12084 genes, 0.0%	3 out of 19716 genes, 0.0%	1
oxidized DNA binding	2 out of 12084 genes, 0.0%	3 out of 19716 genes, 0.0%	1
histone demethylase activity (H3-K4 specific)	2 out of 12084 genes, 0.0%	3 out of 19716 genes, 0.0%	1
oligopeptide transmembrane transporter activity	2 out of 12084 genes, 0.0%	3 out of 19716 genes, 0.0%	1
amino-acid racemase activity	2 out of 12084 genes, 0.0%	3 out of 19716 genes, 0.0%	1
L-amino acid transmembrane transporter activity	13 out of 12084 genes, 0.1%	22 out of 19716 genes, 0.1%	1
transferase activity, transferring glycosyl groups	194 out of 12084 genes, 1.6%	322 out of 19716 genes, 1.6%	1
phosphatase inhibitor activity	23 out of 12084 genes, 0.2%	39 out of 19716 genes, 0.2%	1
peptidase activator activity	10 out of 12084 genes, 0.1%	17 out of 19716 genes, 0.1%	1
protein phosphorylated amino acid binding	14 out of 12084 genes, 0.1%	24 out of 19716 genes, 0.1%	1
fatty acid synthase activity	7 out of 12084 genes, 0.1%	12 out of 19716 genes, 0.1%	1
cytidylyltransferase activity	7 out of 12084 genes, 0.1%	12 out of 19716 genes, 0.1%	1
peptidase activity	446 out of 12084 genes, 3.7%	738 out of 19716 genes, 3.7%	1
peptidase activity, acting on L-amino acid peptides	441 out of 12084 genes, 3.6%	730 out of 19716 genes, 3.7%	1
succinate-CoA ligase activity	3 out of 12084 genes, 0.0%	5 out of 19716 genes, 0.0%	1
interferon receptor activity	3 out of 12084 genes, 0.0%	5 out of 19716 genes, 0.0%	1
interleukin-1 receptor activity	3 out of 12084 genes, 0.0%	5 out of 19716 genes, 0.0%	1
platelet-derived growth factor-activated receptor activity	3 out of 12084 genes, 0.0%	5 out of 19716 genes, 0.0%	1
intracellular cyclic nucleotide activated cation channel activity	3 out of 12084 genes, 0.0%	5 out of 19716 genes, 0.0%	1
inhibitory extracellular ligand-gated ion channel activity	3 out of 12084 genes, 0.0%	5 out of 19716 genes, 0.0%	1
calcium channel regulator activity	3 out of 12084 genes, 0.0%	5 out of 19716 genes, 0.0%	1
copper ion binding	3 out of 12084 genes, 0.0%	5 out of 19716 genes, 0.0%	1
alcohol dehydrogenase (NADP+) activity	3 out of 12084 genes, 0.0%	5 out of 19716 genes, 0.0%	1
cyclase regulator activity	3 out of 12084 genes, 0.0%	5 out of 19716 genes, 0.0%	1
oligopeptide transporter activity	3 out of 12084 genes, 0.0%	5 out of 19716 genes, 0.0%	1
O-acetyltransferase activity	3 out of 12084 genes, 0.0%	5 out of 19716 genes, 0.0%	1
C-palmitoyltransferase activity	3 out of 12084 genes, 0.0%	5 out of 19716 genes, 0.0%	1
cyclo-ligase activity	3 out of 12084 genes, 0.0%	5 out of 19716 genes, 0.0%	1
retinal binding	3 out of 12084 genes, 0.0%	5 out of 19716 genes, 0.0%	1
mismatched DNA binding	3 out of 12084 genes, 0.0%	5 out of 19716 genes, 0.0%	1
melanocortin receptor binding	3 out of 12084 genes, 0.0%	5 out of 19716 genes, 0.0%	1
chondroitin sulfotransferase activity	3 out of 12084 genes, 0.0%	5 out of 19716 genes, 0.0%	1
phosphatidylinositol 3-kinase regulator activity	3 out of 12084 genes, 0.0%	5 out of 19716 genes, 0.0%	1
cyclic nucleotide-gated ion channel activity	3 out of 12084 genes, 0.0%	5 out of 19716 genes, 0.0%	1
alpha-(1->6)-fucosyltransferase activity	3 out of 12084 genes, 0.0%	5 out of 19716 genes, 0.0%	1
protein serine/threonine phosphatase activity	11 out of 12084 genes, 0.1%	19 out of 19716 genes, 0.1%	1
nucleotide receptor activity	11 out of 12084 genes, 0.1%	19 out of 19716 genes, 0.1%	1
G-protein coupled peptide receptor activity	86 out of 12084 genes, 0.7%	145 out of 19716 genes, 0.7%	1
translation factor activity, nucleic acid binding	89 out of 12084 genes, 0.7%	150 out of 19716 genes, 0.8%	1
monosaccharide binding	38 out of 12084 genes, 0.3%	65 out of 19716 genes, 0.3%	1
arachidonic acid monooxygenase activity	8 out of 12084 genes, 0.1%	14 out of 19716 genes, 0.1%	1
receptor activator activity	8 out of 12084 genes, 0.1%	14 out of 19716 genes, 0.1%	1
sulfotransferase activity	32 out of 12084 genes, 0.3%	55 out of 19716 genes, 0.3%	1
carbohydrate phosphatase activity	12 out of 12084 genes, 0.1%	21 out of 19716 genes, 0.1%	1
carboxypeptidase activity	4 out of 12084 genes, 0.0%	7 out of 19716 genes, 0.0%	1
L-glutamate transmembrane transporter activity	4 out of 12084 genes, 0.0%	7 out of 19716 genes, 0.0%	1
polyol transmembrane transporter activity	4 out of 12084 genes, 0.0%	7 out of 19716 genes, 0.0%	1
endodeoxyribonuclease activity, producing 5'-phosphomonoesters	4 out of 12084 genes, 0.0%	7 out of 19716 genes, 0.0%	1
rRNA binding	4 out of 12084 genes, 0.0%	7 out of 19716 genes, 0.0%	1
LRR domain binding	4 out of 12084 genes, 0.0%	7 out of 19716 genes, 0.0%	1
neurotransmitter receptor activity	29 out of 12084 genes, 0.2%	50 out of 19716 genes, 0.3%	1
protein-lipid complex binding	29 out of 12084 genes, 0.2%	50 out of 19716 genes, 0.3%	1
protein dimerization activity	274 out of 12084 genes, 2.3%	457 out of 19716 genes, 2.3%	1
acetylglucosaminyltransferase activity	33 out of 12084 genes, 0.3%	57 out of 19716 genes, 0.3%	1
nucleotidase activity	9 out of 12084 genes, 0.1%	16 out of 19716 genes, 0.1%	1
peptide receptor activity	89 out of 12084 genes, 0.7%	151 out of 19716 genes, 0.8%	1
small conjugating protein-specific protease activity	40 out of 12084 genes, 0.3%	69 out of 19716 genes, 0.3%	1
nucleotide-sugar transmembrane transporter activity	5 out of 12084 genes, 0.0%	9 out of 19716 genes, 0.0%	1
mismatch repair complex binding	5 out of 12084 genes, 0.0%	9 out of 19716 genes, 0.0%	1
apolipoprotein binding	5 out of 12084 genes, 0.0%	9 out of 19716 genes, 0.0%	1
oxidoreductase activity, acting on CH-OH group of donors	96 out of 12084 genes, 0.8%	163 out of 19716 genes, 0.8%	1
carboxylic acid binding	81 out of 12084 genes, 0.7%	138 out of 19716 genes, 0.7%	1
transferase activity, transferring hexosyl groups	121 out of 12084 genes, 1.0%	205 out of 19716 genes, 1.0%	1
acylglycerol O-acyltransferase activity	10 out of 12084 genes, 0.1%	18 out of 19716 genes, 0.1%	1
oxidoreductase activity, acting on the CH-NH group of donors, NAD or NADP as acceptor	10 out of 12084 genes, 0.1%	18 out of 19716 genes, 0.1%	1
GABA receptor activity	10 out of 12084 genes, 0.1%	18 out of 19716 genes, 0.1%	1
peptide binding	54 out of 12084 genes, 0.4%	93 out of 19716 genes, 0.5%	1
ATP-dependent DNA helicase activity	6 out of 12084 genes, 0.0%	11 out of 19716 genes, 0.1%	1
ATP-dependent helicase activity	6 out of 12084 genes, 0.0%	11 out of 19716 genes, 0.1%	1
oxidoreductase activity, oxidizing metal ions	6 out of 12084 genes, 0.0%	11 out of 19716 genes, 0.1%	1
intramolecular transferase activity, phosphotransferases	6 out of 12084 genes, 0.0%	11 out of 19716 genes, 0.1%	1
purine NTP-dependent helicase activity	6 out of 12084 genes, 0.0%	11 out of 19716 genes, 0.1%	1
glutamate receptor activity	22 out of 12084 genes, 0.2%	39 out of 19716 genes, 0.2%	1
monosaccharide transmembrane transporter activity	11 out of 12084 genes, 0.1%	20 out of 19716 genes, 0.1%	1
hexose transmembrane transporter activity	11 out of 12084 genes, 0.1%	20 out of 19716 genes, 0.1%	1
hydrolase activity, acting on carbon-nitrogen (but not peptide) bonds, in linear amidines	7 out of 12084 genes, 0.1%	13 out of 19716 genes, 0.1%	1
RNA binding	313 out of 12084 genes, 2.6%	525 out of 19716 genes, 2.7%	1
solute:sodium symporter activity	23 out of 12084 genes, 0.2%	41 out of 19716 genes, 0.2%	1
steroid binding	37 out of 12084 genes, 0.3%	65 out of 19716 genes, 0.3%	1
oxidoreductase activity, acting on single donors with incorporation of molecular oxygen	57 out of 12084 genes, 0.5%	99 out of 19716 genes, 0.5%	1
dioxygenase activity	44 out of 12084 genes, 0.4%	77 out of 19716 genes, 0.4%	1
ubiquitin binding	16 out of 12084 genes, 0.1%	29 out of 19716 genes, 0.1%	1
phosphoprotein binding	16 out of 12084 genes, 0.1%	29 out of 19716 genes, 0.1%	1
DNA secondary structure binding	12 out of 12084 genes, 0.1%	22 out of 19716 genes, 0.1%	1
syntaxin binding	12 out of 12084 genes, 0.1%	22 out of 19716 genes, 0.1%	1
receptor regulator activity	12 out of 12084 genes, 0.1%	22 out of 19716 genes, 0.1%	1
hormone binding	8 out of 12084 genes, 0.1%	15 out of 19716 genes, 0.1%	1
CCR chemokine receptor binding	8 out of 12084 genes, 0.1%	15 out of 19716 genes, 0.1%	1
endopeptidase activity	290 out of 12084 genes, 2.4%	488 out of 19716 genes, 2.5%	1
transferase activity, transferring sulfur-containing groups	42 out of 12084 genes, 0.3%	74 out of 19716 genes, 0.4%	1
NADPH dehydrogenase activity	2 out of 12084 genes, 0.0%	4 out of 19716 genes, 0.0%	1
GDP-dissociation inhibitor activity	2 out of 12084 genes, 0.0%	4 out of 19716 genes, 0.0%	1
organic cation transmembrane transporter activity	2 out of 12084 genes, 0.0%	4 out of 19716 genes, 0.0%	1
chemokine binding	2 out of 12084 genes, 0.0%	4 out of 19716 genes, 0.0%	1
bombesin receptor binding	2 out of 12084 genes, 0.0%	4 out of 19716 genes, 0.0%	1
DNA insertion or deletion binding	2 out of 12084 genes, 0.0%	4 out of 19716 genes, 0.0%	1
deoxyribonucleotide binding	2 out of 12084 genes, 0.0%	4 out of 19716 genes, 0.0%	1
purine deoxyribonucleotide binding	2 out of 12084 genes, 0.0%	4 out of 19716 genes, 0.0%	1
adenyl deoxyribonucleotide binding	2 out of 12084 genes, 0.0%	4 out of 19716 genes, 0.0%	1
protein-glutamic acid ligase activity	2 out of 12084 genes, 0.0%	4 out of 19716 genes, 0.0%	1
peptidyl-lysine 5-dioxygenase activity	2 out of 12084 genes, 0.0%	4 out of 19716 genes, 0.0%	1
neuropeptide receptor activity	18 out of 12084 genes, 0.1%	33 out of 19716 genes, 0.2%	1
DNA topoisomerase activity	3 out of 12084 genes, 0.0%	6 out of 19716 genes, 0.0%	1
MAP kinase kinase kinase activity	3 out of 12084 genes, 0.0%	6 out of 19716 genes, 0.0%	1
CoA carboxylase activity	3 out of 12084 genes, 0.0%	6 out of 19716 genes, 0.0%	1
oxo-acid-lyase activity	3 out of 12084 genes, 0.0%	6 out of 19716 genes, 0.0%	1
lipoprotein particle binding	26 out of 12084 genes, 0.2%	47 out of 19716 genes, 0.2%	1
metal cluster binding	44 out of 12084 genes, 0.4%	78 out of 19716 genes, 0.4%	1
neutral amino acid transmembrane transporter activity	10 out of 12084 genes, 0.1%	19 out of 19716 genes, 0.1%	1
solute:hydrogen symporter activity	4 out of 12084 genes, 0.0%	8 out of 19716 genes, 0.0%	1
hydroxymethyl-, formyl- and related transferase activity	4 out of 12084 genes, 0.0%	8 out of 19716 genes, 0.0%	1
galactose 3-O-sulfotransferase activity	4 out of 12084 genes, 0.0%	8 out of 19716 genes, 0.0%	1
transferase activity, transferring acyl groups	162 out of 12084 genes, 1.3%	277 out of 19716 genes, 1.4%	1
oxidoreductase activity, acting on paired donors, with incorporation or reduction of molecular oxygen, reduced flavin or flavoprotein as one donor, and incorporation of one atom of oxygen	45 out of 12084 genes, 0.4%	80 out of 19716 genes, 0.4%	1
SNARE binding	31 out of 12084 genes, 0.3%	56 out of 19716 genes, 0.3%	1
oligosaccharyl transferase activity	5 out of 12084 genes, 0.0%	10 out of 19716 genes, 0.1%	1
extracellular matrix structural constituent	5 out of 12084 genes, 0.0%	10 out of 19716 genes, 0.1%	1
oxidoreductase activity, acting on a sulfur group of donors, disulfide as acceptor	5 out of 12084 genes, 0.0%	10 out of 19716 genes, 0.1%	1
vitamin D 25-hydroxylase activity	5 out of 12084 genes, 0.0%	10 out of 19716 genes, 0.1%	1
oxidoreductase activity, acting on paired donors, with incorporation or reduction of molecular oxygen	130 out of 12084 genes, 1.1%	224 out of 19716 genes, 1.1%	1
hydro-lyase activity	28 out of 12084 genes, 0.2%	51 out of 19716 genes, 0.3%	1
transferase activity, transferring acyl groups other than amino-acyl groups	155 out of 12084 genes, 1.3%	266 out of 19716 genes, 1.3%	1
steroid hormone receptor activity	6 out of 12084 genes, 0.0%	12 out of 19716 genes, 0.1%	1
water transmembrane transporter activity	6 out of 12084 genes, 0.0%	12 out of 19716 genes, 0.1%	1
DNA-dependent ATPase activity	6 out of 12084 genes, 0.0%	12 out of 19716 genes, 0.1%	1
poly-pyrimidine tract binding	6 out of 12084 genes, 0.0%	12 out of 19716 genes, 0.1%	1
protein transmembrane transporter activity	6 out of 12084 genes, 0.0%	12 out of 19716 genes, 0.1%	1
small protein activating enzyme activity	6 out of 12084 genes, 0.0%	12 out of 19716 genes, 0.1%	1
apoptotic protease activator activity	6 out of 12084 genes, 0.0%	12 out of 19716 genes, 0.1%	1
carbon-sulfur lyase activity	6 out of 12084 genes, 0.0%	12 out of 19716 genes, 0.1%	1
macromolecule transmembrane transporter activity	6 out of 12084 genes, 0.0%	12 out of 19716 genes, 0.1%	1
glucosyltransferase activity	6 out of 12084 genes, 0.0%	12 out of 19716 genes, 0.1%	1
ligase activity, forming carbon-oxygen bonds	25 out of 12084 genes, 0.2%	46 out of 19716 genes, 0.2%	1
ligase activity, forming aminoacyl-tRNA and related compounds	25 out of 12084 genes, 0.2%	46 out of 19716 genes, 0.2%	1
single-stranded RNA binding	7 out of 12084 genes, 0.1%	14 out of 19716 genes, 0.1%	1
ionotropic glutamate receptor activity	13 out of 12084 genes, 0.1%	25 out of 19716 genes, 0.1%	1
peptidase regulator activity	152 out of 12084 genes, 1.3%	262 out of 19716 genes, 1.3%	1
acidic amino acid transmembrane transporter activity	8 out of 12084 genes, 0.1%	16 out of 19716 genes, 0.1%	1
structural molecule activity	281 out of 12084 genes, 2.3%	478 out of 19716 genes, 2.4%	1
peptidase inhibitor activity	128 out of 12084 genes, 1.1%	222 out of 19716 genes, 1.1%	1
carbon-carbon lyase activity	31 out of 12084 genes, 0.3%	57 out of 19716 genes, 0.3%	1
heat shock protein binding	19 out of 12084 genes, 0.2%	36 out of 19716 genes, 0.2%	1
mannosyltransferase activity	9 out of 12084 genes, 0.1%	18 out of 19716 genes, 0.1%	1
3'-5' exonuclease activity	9 out of 12084 genes, 0.1%	18 out of 19716 genes, 0.1%	1
endopeptidase regulator activity	136 out of 12084 genes, 1.1%	236 out of 19716 genes, 1.2%	1
amino acid binding	32 out of 12084 genes, 0.3%	59 out of 19716 genes, 0.3%	1
antigen binding	15 out of 12084 genes, 0.1%	29 out of 19716 genes, 0.1%	1
transferase activity, transferring amino-acyl groups	10 out of 12084 genes, 0.1%	20 out of 19716 genes, 0.1%	1
oxidoreductase activity, acting on the CH-OH group of donors, NAD or NADP as acceptor	72 out of 12084 genes, 0.6%	128 out of 19716 genes, 0.6%	1
endopeptidase inhibitor activity	122 out of 12084 genes, 1.0%	213 out of 19716 genes, 1.1%	1
oxidoreductase activity, acting on CH or CH2 groups	11 out of 12084 genes, 0.1%	22 out of 19716 genes, 0.1%	1
hydrolase activity, hydrolyzing N-glycosyl compounds	11 out of 12084 genes, 0.1%	22 out of 19716 genes, 0.1%	1
sterol binding	17 out of 12084 genes, 0.1%	33 out of 19716 genes, 0.2%	1
intramolecular transferase activity	18 out of 12084 genes, 0.1%	35 out of 19716 genes, 0.2%	1
angiotensin receptor activity	4 out of 12084 genes, 0.0%	9 out of 19716 genes, 0.0%	1
cation:chloride symporter activity	4 out of 12084 genes, 0.0%	9 out of 19716 genes, 0.0%	1
inositol trisphosphate kinase activity	4 out of 12084 genes, 0.0%	9 out of 19716 genes, 0.0%	1
lipase activator activity	4 out of 12084 genes, 0.0%	9 out of 19716 genes, 0.0%	1
oxidoreductase activity, acting on the CH-CH group of donors, NAD or NADP as acceptor	13 out of 12084 genes, 0.1%	26 out of 19716 genes, 0.1%	1
protein phosphatase inhibitor activity	5 out of 12084 genes, 0.0%	11 out of 19716 genes, 0.1%	1
peroxisome targeting sequence binding	3 out of 12084 genes, 0.0%	7 out of 19716 genes, 0.0%	1
protein-hormone receptor activity	3 out of 12084 genes, 0.0%	7 out of 19716 genes, 0.0%	1
oxidoreductase activity, oxidizing metal ions, NAD or NADP as acceptor	3 out of 12084 genes, 0.0%	7 out of 19716 genes, 0.0%	1
G-protein coupled receptor binding	93 out of 12084 genes, 0.8%	165 out of 19716 genes, 0.8%	1
isomerase activity	90 out of 12084 genes, 0.7%	160 out of 19716 genes, 0.8%	1
antioxidant activity	32 out of 12084 genes, 0.3%	60 out of 19716 genes, 0.3%	1
symporter activity	40 out of 12084 genes, 0.3%	74 out of 19716 genes, 0.4%	1
solute:cation symporter activity	40 out of 12084 genes, 0.3%	74 out of 19716 genes, 0.4%	1
death receptor activity	6 out of 12084 genes, 0.0%	13 out of 19716 genes, 0.1%	1
aldehyde-lyase activity	6 out of 12084 genes, 0.0%	13 out of 19716 genes, 0.1%	1
RNA polymerase II core promoter proximal region sequence-specific DNA binding transcription factor activity	7 out of 12084 genes, 0.1%	15 out of 19716 genes, 0.1%	1
adenylate cyclase inhibiting G-protein coupled glutamate receptor activity	2 out of 12084 genes, 0.0%	5 out of 19716 genes, 0.0%	1
aminopeptidase activity	2 out of 12084 genes, 0.0%	5 out of 19716 genes, 0.0%	1
phospholipase inhibitor activity	2 out of 12084 genes, 0.0%	5 out of 19716 genes, 0.0%	1
melanocortin receptor activity	2 out of 12084 genes, 0.0%	5 out of 19716 genes, 0.0%	1
interleukin-1 receptor binding	2 out of 12084 genes, 0.0%	5 out of 19716 genes, 0.0%	1
monoamine transmembrane transporter activity	2 out of 12084 genes, 0.0%	5 out of 19716 genes, 0.0%	1
G-protein coupled glutamate receptor binding	2 out of 12084 genes, 0.0%	5 out of 19716 genes, 0.0%	1
uridylyltransferase activity	2 out of 12084 genes, 0.0%	5 out of 19716 genes, 0.0%	1
drug transmembrane transporter activity	8 out of 12084 genes, 0.1%	17 out of 19716 genes, 0.1%	1
UDP-glycosyltransferase activity	92 out of 12084 genes, 0.8%	164 out of 19716 genes, 0.8%	1
ATPase activity, coupled to transmembrane movement of ions, phosphorylative mechanism	15 out of 12084 genes, 0.1%	30 out of 19716 genes, 0.2%	1
tumor necrosis factor receptor superfamily binding	25 out of 12084 genes, 0.2%	48 out of 19716 genes, 0.2%	1
phosphotransferase activity, for other substituted phosphate groups	9 out of 12084 genes, 0.1%	19 out of 19716 genes, 0.1%	1
MHC protein binding	9 out of 12084 genes, 0.1%	19 out of 19716 genes, 0.1%	1
organic acid:sodium symporter activity	16 out of 12084 genes, 0.1%	32 out of 19716 genes, 0.2%	1
phospholipid transporter activity	23 out of 12084 genes, 0.2%	45 out of 19716 genes, 0.2%	1
monooxygenase activity	79 out of 12084 genes, 0.7%	143 out of 19716 genes, 0.7%	1
chemokine receptor activity	13 out of 12084 genes, 0.1%	27 out of 19716 genes, 0.1%	1
UDP-galactosyltransferase activity	14 out of 12084 genes, 0.1%	29 out of 19716 genes, 0.1%	1
G-protein coupled amine receptor activity	21 out of 12084 genes, 0.2%	42 out of 19716 genes, 0.2%	1
oxidoreductase activity, acting on CH or CH2 groups, quinone or similar compound as acceptor	6 out of 12084 genes, 0.0%	14 out of 19716 genes, 0.1%	1
lipase inhibitor activity	6 out of 12084 genes, 0.0%	14 out of 19716 genes, 0.1%	1
anion:cation symporter activity	7 out of 12084 genes, 0.1%	16 out of 19716 genes, 0.1%	1
oxidoreductase activity, acting on NADH or NADPH, heme protein as acceptor	7 out of 12084 genes, 0.1%	16 out of 19716 genes, 0.1%	1
phosphate ion transmembrane transporter activity	4 out of 12084 genes, 0.0%	10 out of 19716 genes, 0.1%	1
CoA hydrolase activity	4 out of 12084 genes, 0.0%	10 out of 19716 genes, 0.1%	1
oxidoreductase activity, acting on the CH-CH group of donors, oxygen as acceptor	4 out of 12084 genes, 0.0%	10 out of 19716 genes, 0.1%	1
hydrolase activity, acting on carbon-nitrogen (but not peptide) bonds, in cyclic amides	4 out of 12084 genes, 0.0%	10 out of 19716 genes, 0.1%	1
intramolecular oxidoreductase activity, interconverting keto- and enol-groups	4 out of 12084 genes, 0.0%	10 out of 19716 genes, 0.1%	1
intramolecular oxidoreductase activity	28 out of 12084 genes, 0.2%	55 out of 19716 genes, 0.3%	1
arachidonic acid epoxygenase activity	3 out of 12084 genes, 0.0%	8 out of 19716 genes, 0.0%	1
tricarboxylic acid transmembrane transporter activity	3 out of 12084 genes, 0.0%	8 out of 19716 genes, 0.0%	1
ether hydrolase activity	3 out of 12084 genes, 0.0%	8 out of 19716 genes, 0.0%	1
neuropeptide receptor binding	10 out of 12084 genes, 0.1%	22 out of 19716 genes, 0.1%	1
DNA helicase activity	19 out of 12084 genes, 0.2%	39 out of 19716 genes, 0.2%	1
oxidoreductase activity, acting on a sulfur group of donors	30 out of 12084 genes, 0.2%	59 out of 19716 genes, 0.3%	1
acyl-CoA oxidase activity	2 out of 12084 genes, 0.0%	6 out of 19716 genes, 0.0%	1
alpha-adrenergic receptor activity	2 out of 12084 genes, 0.0%	6 out of 19716 genes, 0.0%	1
pheromone activity	2 out of 12084 genes, 0.0%	6 out of 19716 genes, 0.0%	1
oxidoreductase activity, acting on a sulfur group of donors, oxygen as acceptor	2 out of 12084 genes, 0.0%	6 out of 19716 genes, 0.0%	1
immunoglobulin receptor activity	2 out of 12084 genes, 0.0%	6 out of 19716 genes, 0.0%	1
iron ion binding	124 out of 12084 genes, 1.0%	223 out of 19716 genes, 1.1%	1
G-protein coupled chemoattractant receptor activity	14 out of 12084 genes, 0.1%	30 out of 19716 genes, 0.2%	1
galactosyltransferase activity	14 out of 12084 genes, 0.1%	30 out of 19716 genes, 0.2%	1
translation repressor activity	7 out of 12084 genes, 0.1%	17 out of 19716 genes, 0.1%	1
aminoacyl-tRNA ligase activity	19 out of 12084 genes, 0.2%	40 out of 19716 genes, 0.2%	1
peptide transporter activity	6 out of 12084 genes, 0.0%	15 out of 19716 genes, 0.1%	1
transcription regulatory region sequence-specific DNA binding	9 out of 12084 genes, 0.1%	21 out of 19716 genes, 0.1%	1
RNA polymerase II regulatory region sequence-specific DNA binding	9 out of 12084 genes, 0.1%	21 out of 19716 genes, 0.1%	1
RNA polymerase II regulatory region DNA binding	9 out of 12084 genes, 0.1%	21 out of 19716 genes, 0.1%	1
receptor binding	742 out of 12084 genes, 6.1%	1263 out of 19716 genes, 6.4%	1
G-protein coupled nucleotide receptor activity	12 out of 12084 genes, 0.1%	27 out of 19716 genes, 0.1%	1
DNA (cytosine-5-)-methyltransferase activity	4 out of 12084 genes, 0.0%	11 out of 19716 genes, 0.1%	1
neurotrophin receptor binding	4 out of 12084 genes, 0.0%	11 out of 19716 genes, 0.1%	1
protein prenyltransferase activity	4 out of 12084 genes, 0.0%	11 out of 19716 genes, 0.1%	1
DNA-methyltransferase activity	4 out of 12084 genes, 0.0%	11 out of 19716 genes, 0.1%	1
DNA N-glycosylase activity	4 out of 12084 genes, 0.0%	11 out of 19716 genes, 0.1%	1
hormone activity	16 out of 12084 genes, 0.1%	35 out of 19716 genes, 0.2%	1
adrenergic receptor activity	3 out of 12084 genes, 0.0%	9 out of 19716 genes, 0.0%	1
taste receptor activity	3 out of 12084 genes, 0.0%	9 out of 19716 genes, 0.0%	1
disulfide oxidoreductase activity	17 out of 12084 genes, 0.1%	37 out of 19716 genes, 0.2%	1
oxidoreductase activity	477 out of 12084 genes, 3.9%	824 out of 19716 genes, 4.2%	1
steroid dehydrogenase activity	19 out of 12084 genes, 0.2%	41 out of 19716 genes, 0.2%	1
lipopolysaccharide binding	2 out of 12084 genes, 0.0%	7 out of 19716 genes, 0.0%	1
isocitrate dehydrogenase activity	2 out of 12084 genes, 0.0%	7 out of 19716 genes, 0.0%	1
peptide-transporting ATPase activity	2 out of 12084 genes, 0.0%	7 out of 19716 genes, 0.0%	1
alpha-sialidase activity	2 out of 12084 genes, 0.0%	7 out of 19716 genes, 0.0%	1
prenyltransferase activity	8 out of 12084 genes, 0.1%	20 out of 19716 genes, 0.1%	1
monocarboxylic acid transmembrane transporter activity	8 out of 12084 genes, 0.1%	20 out of 19716 genes, 0.1%	1
CoA-ligase activity	6 out of 12084 genes, 0.0%	16 out of 19716 genes, 0.1%	1
protein geranylgeranyltransferase activity	3 out of 12084 genes, 0.0%	10 out of 19716 genes, 0.1%	1
procollagen-proline dioxygenase activity	3 out of 12084 genes, 0.0%	10 out of 19716 genes, 0.1%	1
peptidyl-proline dioxygenase activity	3 out of 12084 genes, 0.0%	10 out of 19716 genes, 0.1%	1
intramolecular oxidoreductase activity, transposing C=C bonds	10 out of 12084 genes, 0.1%	25 out of 19716 genes, 0.1%	1
transcription regulatory region DNA binding	10 out of 12084 genes, 0.1%	25 out of 19716 genes, 0.1%	1
regulatory region DNA binding	13 out of 12084 genes, 0.1%	31 out of 19716 genes, 0.2%	1
regulatory region nucleic acid binding	13 out of 12084 genes, 0.1%	31 out of 19716 genes, 0.2%	1
C-acyltransferase activity	8 out of 12084 genes, 0.1%	21 out of 19716 genes, 0.1%	1
oxidoreductase activity, acting on single donors with incorporation of molecular oxygen, incorporation of two atoms of oxygen	8 out of 12084 genes, 0.1%	21 out of 19716 genes, 0.1%	1
signal sequence binding	16 out of 12084 genes, 0.1%	37 out of 19716 genes, 0.2%	1
steroid dehydrogenase activity, acting on the CH-OH group of donors, NAD or NADP as acceptor	16 out of 12084 genes, 0.1%	37 out of 19716 genes, 0.2%	1
C-acetyltransferase activity	2 out of 12084 genes, 0.0%	8 out of 19716 genes, 0.0%	1
angiotensin receptor binding	2 out of 12084 genes, 0.0%	8 out of 19716 genes, 0.0%	1
fucosyltransferase activity	8 out of 12084 genes, 0.1%	22 out of 19716 genes, 0.1%	1
amine binding	8 out of 12084 genes, 0.1%	22 out of 19716 genes, 0.1%	1
retinoid binding	16 out of 12084 genes, 0.1%	40 out of 19716 genes, 0.2%	1
heme-copper terminal oxidase activity	9 out of 12084 genes, 0.1%	28 out of 19716 genes, 0.1%	1
isoprenoid binding	16 out of 12084 genes, 0.1%	43 out of 19716 genes, 0.2%	1
cytokine receptor binding	112 out of 12084 genes, 0.9%	224 out of 19716 genes, 1.1%	1
oxidoreductase activity, acting on NADH or NADPH	38 out of 12084 genes, 0.3%	91 out of 19716 genes, 0.5%	1
oxidoreductase activity, acting on NADH or NADPH, quinone or similar compound as acceptor	13 out of 12084 genes, 0.1%	45 out of 19716 genes, 0.2%	1
NADH dehydrogenase activity	10 out of 12084 genes, 0.1%	40 out of 19716 genes, 0.2%	1
NADH dehydrogenase (quinone) activity	10 out of 12084 genes, 0.1%	40 out of 19716 genes, 0.2%	1
odorant binding	46 out of 12084 genes, 0.4%	123 out of 19716 genes, 0.6%	1
signal transducer activity	1506 out of 12084 genes, 12.5%	2974 out of 19716 genes, 15.1%	1
receptor activity	989 out of 12084 genes, 8.2%	2095 out of 19716 genes, 10.6%	1
transmembrane signaling receptor activity	838 out of 12084 genes, 6.9%	1835 out of 19716 genes, 9.3%	1
G-protein coupled receptor activity	348 out of 12084 genes, 2.9%	827 out of 19716 genes, 4.2%	1
signaling receptor activity	891 out of 12084 genes, 7.4%	1917 out of 19716 genes, 9.7%	1
molecular transducer activity	1725 out of 12084 genes, 14.3%	3310 out of 19716 genes, 16.8%	1
