# Supplementary material for: Identification of Circulating miRNAs in a Mouse Model of Nerve Allograft Transplantation under FK506 Immunosuppression by Illumina Small RNA Deep Sequencing
Source: Dis Markers. 2015 Sep 8;2015:863192. doi: 10.1155/2015/863192 (PMC4578739; doi:10.1155/2015/863192)
Supplement: Supplementary file 1 — Expression profile of the miRNAs by Illumina small RNA deep sequencing. [file 863192.f1.zip › 863192.f1/Supplementary file 4.xlsx]

## Sheet: KEGG
#	Pathway	Target genes with pathway annotation (16422)	All genes of the species with pathway annotation (21703)	Pvalue	Qvalue	Pathway ID
1	MAPK signaling pathway	574 (3.5%)	668 (3.08%)	2.18942e-11	5.99901e-09	ko04144
2	Wnt signaling pathway	468 (2.85%)	544 (2.51%)	1.09609e-09	1.50165e-07	ko04310
3	Pathways in cancer	467 (2.84%)	548 (2.52%)	1.89856e-08	1.73402e-06	ko05200
4	Focal adhesion	501 (3.05%)	593 (2.73%)	7.14129e-08	4.89178e-06	ko04510
5	Axon guidance	196 (1.19%)	224 (1.03%)	6.94055e-06	0.000380342	ko04360
6	Gap junction	95 (0.58%)	104 (0.48%)	3.45249e-05	0.00157664	ko04540
7	Calcium signaling pathway	346 (2.11%)	414 (1.91%)	5.29716e-05	0.00207346	ko04020
8	Notch signaling pathway	428 (2.61%)	519 (2.39%)	9.93441e-05	0.00279442	ko04330
9	Tight junction	156 (0.95%)	180 (0.83%)	0.000181374	0.00414138	ko04530
10	Prostate cancer	270 (1.64%)	322 (1.48%)	0.000215149	0.00453468	ko05215
11	Melanogenesis	120 (0.73%)	137 (0.63%)	0.00037806	0.00739513	ko04916
12	NOD-like receptor signaling pathway	175 (1.07%)	205 (0.94%)	0.000438316	0.00739513	ko04621
13	Neurotrophin signaling pathway	66 (0.4%)	72 (0.33%)	0.000440083	0.00739513	ko04722
14	Epithelial cell signaling in Helicobacter pylori infection	429 (2.61%)	525 (2.42%)	0.000470125	0.00739513	ko05120
15	GnRH signaling pathway	109 (0.66%)	124 (0.57%)	0.000509968	0.00739513	ko04912
16	Thyroid cancer	118 (0.72%)	135 (0.62%)	0.000512801	0.00739513	ko05216
17	Regulation of actin cytoskeleton	229 (1.39%)	273 (1.26%)	0.000601786	0.00788877	ko04810
18	Endometrial cancer	295 (1.8%)	356 (1.64%)	0.000604614	0.00788877	ko05213
19	Renal cell carcinoma	134 (0.82%)	155 (0.71%)	0.000645731	0.00804229	ko05211
20	Osteoclast differentiation	166 (1.01%)	195 (0.9%)	0.0008106	0.00925435	ko04380
21	Leukocyte transendothelial migration	166 (1.01%)	195 (0.9%)	0.0008106	0.00925435	ko04670
22	ErbB signaling pathway	148 (0.9%)	173 (0.8%)	0.000968695	0.0104368	ko04012
23	Chronic myeloid leukemia	152 (0.93%)	178 (0.82%)	0.000990352	0.0104368	ko05220
24	Pancreatic cancer	142 (0.86%)	166 (0.76%)	0.00122833	0.0124653	ko05212
25	Progesterone-mediated oocyte maturation	237 (1.44%)	285 (1.31%)	0.00135158	0.0132262	ko04914
26	Adipocytokine signaling pathway	284 (1.73%)	345 (1.59%)	0.00171703	0.016223	ko04920
27	Ubiquitin mediated proteolysis	128 (0.78%)	150 (0.69%)	0.00256583	0.0234346	ko04120
28	Acute myeloid leukemia	319 (1.94%)	391 (1.8%)	0.00285962	0.0252754	ko05221
29	Chemokine signaling pathway	171 (1.04%)	204 (0.94%)	0.00301226	0.0254025	ko04062
30	Pancreatic secretion	155 (0.94%)	184 (0.85%)	0.00305942	0.0254025	ko04972
31	VEGF signaling pathway	242 (1.47%)	294 (1.35%)	0.00365158	0.0294275	ko04370
32	Cell adhesion molecules (CAMs)	141 (0.86%)	167 (0.77%)	0.00386192	0.0302333	ko04514
33	B cell receptor signaling pathway	193 (1.18%)	233 (1.07%)	0.0051561	0.0391193	ko04662
34	Dilated cardiomyopathy	110 (0.67%)	129 (0.59%)	0.00528253	0.0391193	ko05414
35	Ribosome biogenesis in eukaryotes	161 (0.98%)	193 (0.89%)	0.00584506	0.042146	ko03008
36	Arrhythmogenic right ventricular cardiomyopathy (ARVC)	75 (0.46%)	86 (0.4%)	0.0061067	0.0426016	ko05412
37	Basal cell carcinoma	172 (1.05%)	207 (0.95%)	0.00621922	0.0426016	ko05217
38	Chagas disease (American trypanosomiasis)	156 (0.95%)	187 (0.86%)	0.00658582	0.0440125	ko05142
39	Shigellosis	220 (1.34%)	268 (1.23%)	0.00694843	0.0453303	ko05131
40	Toxoplasmosis	86 (0.52%)	100 (0.46%)	0.00805805	0.0513466	ko05145
41	Vasopressin-regulated water reabsorption	17 (0.1%)	17 (0.08%)	0.00872029	0.0543036	ko04962
42	Fatty acid biosynthesis	179 (1.09%)	217 (1%)	0.00964994	0.0580565	ko00061
43	Hypertrophic cardiomyopathy (HCM)	109 (0.66%)	129 (0.59%)	0.00995665	0.0580565	ko05410
44	Bile secretion	113 (0.69%)	134 (0.62%)	0.0099586	0.0580565	ko04976
45	Melanoma	144 (0.88%)	173 (0.8%)	0.0103573	0.0591227	ko05218
46	Apoptosis	261 (1.59%)	322 (1.48%)	0.0121352	0.0678581	ko04210
47	Type II diabetes mellitus	118 (0.72%)	141 (0.65%)	0.0139086	0.0762194	ko04930
48	Lysosome	197 (1.2%)	241 (1.11%)	0.0143711	0.0772094	ko04142
49	Leishmaniasis	97 (0.59%)	115 (0.53%)	0.0161372	0.0850307	ko05140
50	Glioma	131 (0.8%)	158 (0.73%)	0.0180473	0.0933012	ko05214
51	Cell cycle - yeast	115 (0.7%)	138 (0.64%)	0.0193493	0.0981799	ko04111
52	Cell cycle	176 (1.07%)	216 (1%)	0.0248039	0.123569	ko04110
53	beta-Alanine metabolism	39 (0.24%)	44 (0.2%)	0.0268512	0.131379	ko00410
54	Hepatitis C	246 (1.5%)	306 (1.41%)	0.0284314	0.135163	ko05160
55	T cell receptor signaling pathway	196 (1.19%)	242 (1.12%)	0.0286112	0.135163	ko04660
56	Pantothenate and CoA biosynthesis	24 (0.15%)	26 (0.12%)	0.0304594	0.137914	ko00770
57	TGF-beta signaling pathway	122 (0.74%)	148 (0.68%)	0.0304973	0.137914	ko04350
58	Insulin signaling pathway	259 (1.58%)	323 (1.49%)	0.0307035	0.137914	ko04910
59	Purine metabolism	248 (1.51%)	309 (1.42%)	0.0316547	0.139894	ko00230
60	Tyrosine metabolism	59 (0.36%)	69 (0.32%)	0.0334415	0.145444	ko00350
61	Colorectal cancer	119 (0.72%)	145 (0.67%)	0.0407309	0.172758	ko05210
62	Gastric acid secretion	130 (0.79%)	159 (0.73%)	0.0409827	0.172758	ko04971
63	Fc gamma R-mediated phagocytosis	184 (1.12%)	228 (1.05%)	0.0416749	0.173014	ko04666
64	ABC transporters	57 (0.35%)	67 (0.31%)	0.0437891	0.177985	ko02010
65	Pathogenic Escherichia coli infection	118 (0.72%)	144 (0.66%)	0.0447465	0.177985	ko05130
66	Sulfur relay system	17 (0.1%)	18 (0.08%)	0.0448211	0.177985	ko04122
67	Non-small cell lung cancer	95 (0.58%)	115 (0.53%)	0.0477549	0.186926	ko05223
68	Drug metabolism - other enzymes	68 (0.41%)	81 (0.37%)	0.0490232	0.188754	ko00983
69	Dorso-ventral axis formation	60 (0.37%)	71 (0.33%)	0.0498478	0.188754	ko04320
70	Phosphatidylinositol signaling system	153 (0.93%)	189 (0.87%)	0.0502885	0.188754	ko04070
71	Viral myocarditis	273 (1.66%)	344 (1.59%)	0.0591414	0.218983	ko05416
72	Bladder cancer	66 (0.4%)	79 (0.36%)	0.0620413	0.224721	ko05219
73	Adherens junction	168 (1.02%)	209 (0.96%)	0.0623315	0.224721	ko04520
74	p53 signaling pathway	124 (0.76%)	153 (0.7%)	0.0691184	0.244478	ko04115
75	Graft-versus-host disease	65 (0.4%)	78 (0.36%)	0.0695959	0.244478	ko05332
76	Long-term depression	116 (0.71%)	143 (0.66%)	0.0740259	0.256748	ko04730
77	Aldosterone-regulated sodium reabsorption	83 (0.51%)	101 (0.47%)	0.0755402	0.257937	ko04960
78	Vascular smooth muscle contraction	231 (1.41%)	291 (1.34%)	0.0762513	0.257937	ko04270
79	Polycyclic aromatic hydrocarbon degradation	9 (0.05%)	9 (0.04%)	0.081269	0.268286	ko00624
80	Butirosin and neomycin biosynthesis	9 (0.05%)	9 (0.04%)	0.081269	0.268286	ko00524
81	Salivary secretion	160 (0.97%)	200 (0.92%)	0.0861335	0.280232	ko04970
82	RNA transport	273 (1.66%)	346 (1.59%)	0.0869331	0.280232	ko03013
83	Type I diabetes mellitus	76 (0.46%)	93 (0.43%)	0.104602	0.333266	ko04940
84	Streptomycin biosynthesis	13 (0.08%)	14 (0.06%)	0.110896	0.349257	ko00521
85	Hedgehog signaling pathway	67 (0.41%)	82 (0.38%)	0.123658	0.379993	ko04340
86	Inositol phosphate metabolism	92 (0.56%)	114 (0.53%)	0.124307	0.379993	ko00562
87	Toll-like receptor signaling pathway	175 (1.07%)	221 (1.02%)	0.124815	0.379993	ko04620
88	MAPK signaling pathway - fly	29 (0.18%)	34 (0.16%)	0.131272	0.391713	ko04013
89	Proximal tubule bicarbonate reclamation	25 (0.15%)	29 (0.13%)	0.131524	0.391713	ko04964
90	Bacterial secretion system	7 (0.04%)	7 (0.03%)	0.141974	0.409483	ko03070
91	Styrene degradation	7 (0.04%)	7 (0.03%)	0.141974	0.409483	ko00643
92	Cell cycle - Caulobacter	7 (0.04%)	7 (0.03%)	0.141974	0.409483	ko04112
93	ECM-receptor interaction	186 (1.13%)	236 (1.09%)	0.144965	0.410645	ko04512
94	Neuroactive ligand-receptor interaction	339 (2.06%)	435 (2%)	0.145374	0.410645	ko04080
95	Oocyte meiosis	172 (1.05%)	218 (1%)	0.149207	0.417172	ko04114
96	Histidine metabolism	39 (0.24%)	47 (0.22%)	0.158582	0.434968	ko00340
97	Glycerolipid metabolism	82 (0.5%)	102 (0.47%)	0.158747	0.434968	ko00561
98	Fc epsilon RI signaling pathway	130 (0.79%)	164 (0.76%)	0.161704	0.438682	ko04664
99	DNA replication	35 (0.21%)	42 (0.19%)	0.163882	0.440233	ko03030
100	Amoebiasis	207 (1.26%)	264 (1.22%)	0.165509	0.440286	ko05146
101	Protein digestion and absorption	149 (0.91%)	189 (0.87%)	0.175416	0.455185	ko04974
102	RNA degradation	132 (0.8%)	167 (0.77%)	0.176724	0.455185	ko03018
103	Selenocompound metabolism	23 (0.14%)	27 (0.12%)	0.177755	0.455185	ko00450
104	Steroid biosynthesis	23 (0.14%)	27 (0.12%)	0.177755	0.455185	ko00100
105	Mucin type O-Glycan biosynthesis	34 (0.21%)	41 (0.19%)	0.184983	0.464377	ko00512
106	Glycine, serine and threonine metabolism	52 (0.32%)	64 (0.29%)	0.186248	0.464377	ko00260
107	Long-term potentiation	121 (0.74%)	153 (0.7%)	0.186429	0.464377	ko04720
108	Amyotrophic lateral sclerosis (ALS)	114 (0.69%)	144 (0.66%)	0.189147	0.466905	ko05014
109	Measles	214 (1.3%)	274 (1.26%)	0.191653	0.468865	ko05162
110	Collecting duct acid secretion	37 (0.23%)	45 (0.21%)	0.199447	0.483616	ko04966
111	SNARE interactions in vesicular transport	44 (0.27%)	54 (0.25%)	0.203285	0.488597	ko04130
112	Glyoxylate and dicarboxylate metabolism	22 (0.13%)	26 (0.12%)	0.205402	0.489393	ko00630
113	RNA polymerase	40 (0.24%)	49 (0.23%)	0.212637	0.500085	ko03020
114	Glycosaminoglycan degradation	29 (0.18%)	35 (0.16%)	0.21719	0.500085	ko00531
115	MAPK signaling pathway - yeast	29 (0.18%)	35 (0.16%)	0.21719	0.500085	ko04011
116	Glycosaminoglycan biosynthesis - heparan sulfate	29 (0.18%)	35 (0.16%)	0.21719	0.500085	ko00534
117	Propanoate metabolism	43 (0.26%)	53 (0.24%)	0.224732	0.513139	ko00640
118	RIG-I-like receptor signaling pathway	107 (0.65%)	136 (0.63%)	0.23827	0.539553	ko04622
119	Pyrimidine metabolism	136 (0.83%)	174 (0.8%)	0.250518	0.56264	ko00240
120	Mismatch repair	24 (0.15%)	29 (0.13%)	0.257239	0.568415	ko03430
121	One carbon pool by folate	24 (0.15%)	29 (0.13%)	0.257239	0.568415	ko00670
122	Spliceosome	243 (1.48%)	314 (1.45%)	0.259971	0.569857	ko03040
123	Primary immunodeficiency	55 (0.33%)	69 (0.32%)	0.264761	0.57575	ko05340
124	Hematopoietic cell lineage	131 (0.8%)	168 (0.77%)	0.274188	0.591555	ko04640
125	mTOR signaling pathway	104 (0.63%)	133 (0.61%)	0.284814	0.60968	ko04150
126	Nucleotide excision repair	57 (0.35%)	72 (0.33%)	0.295036	0.626665	ko03420
127	Cysteine and methionine metabolism	60 (0.37%)	76 (0.35%)	0.302666	0.637927	ko00270
128	Vibrio cholerae infection	119 (0.72%)	153 (0.7%)	0.307106	0.642345	ko05110
129	Galactose metabolism	39 (0.24%)	49 (0.23%)	0.325956	0.676605	ko00052
130	mRNA surveillance pathway	153 (0.93%)	198 (0.91%)	0.332012	0.683994	ko03015
131	Carbohydrate digestion and absorption	65 (0.4%)	83 (0.38%)	0.338529	0.692215	ko04973
132	Allograft rejection	68 (0.41%)	87 (0.4%)	0.344622	0.699454	ko05330
133	Protein processing in endoplasmic reticulum	228 (1.39%)	297 (1.37%)	0.356739	0.718725	ko04141
134	Phagosome	319 (1.94%)	417 (1.92%)	0.369323	0.738646	ko04145
135	alpha-Linolenic acid metabolism	34 (0.21%)	43 (0.2%)	0.376543	0.743001	ko00592
136	Valine, leucine and isoleucine biosynthesis	14 (0.09%)	17 (0.08%)	0.376924	0.743001	ko00290
137	Limonene and pinene degradation	7 (0.04%)	8 (0.04%)	0.383878	0.751304	ko00903
138	Circadian rhythm - mammal	27 (0.16%)	34 (0.16%)	0.39099	0.753476	ko04710
139	Ascorbate and aldarate metabolism	27 (0.16%)	34 (0.16%)	0.39099	0.753476	ko00053
140	Vitamin digestion and absorption	40 (0.24%)	51 (0.23%)	0.393238	0.753476	ko04977
141	Meiosis - yeast	91 (0.55%)	118 (0.54%)	0.403759	0.760404	ko04113
142	Butanoate metabolism	46 (0.28%)	59 (0.27%)	0.406978	0.760404	ko00650
143	Pyruvate metabolism	62 (0.38%)	80 (0.37%)	0.408666	0.760404	ko00620
144	Folate biosynthesis	10 (0.06%)	12 (0.06%)	0.411553	0.760404	ko00790
145	Two-component system	10 (0.06%)	12 (0.06%)	0.411553	0.760404	ko02020
146	Phototransduction - fly	65 (0.4%)	84 (0.39%)	0.413505	0.760404	ko04745
147	Nitrogen metabolism	26 (0.16%)	33 (0.15%)	0.428324	0.777942	ko00910
148	Basal transcription factors	58 (0.35%)	75 (0.35%)	0.42872	0.777942	ko03022
149	Lipoic acid metabolism	3 (0.02%)	3 (0.01%)	0.433211	0.78092	ko00785
150	Linoleic acid metabolism	64 (0.39%)	83 (0.38%)	0.437623	0.783716	ko00591
151	Amino sugar and nucleotide sugar metabolism	70 (0.43%)	91 (0.42%)	0.445585	0.787903	ko00520
152	Mineral absorption	51 (0.31%)	66 (0.3%)	0.445712	0.787903	ko04978
153	Pentose phosphate pathway	35 (0.21%)	45 (0.21%)	0.449589	0.789662	ko00030
154	Atrazine degradation	6 (0.04%)	7 (0.03%)	0.461684	0.801537	ko00791
155	Other types of O-glycan biosynthesis	63 (0.38%)	82 (0.38%)	0.4622	0.801537	ko00514
156	Cytosolic DNA-sensing pathway	100 (0.61%)	131 (0.6%)	0.476263	0.82073	ko04623
157	Lysine degradation	81 (0.49%)	106 (0.49%)	0.481192	0.824042	ko00310
158	Fatty acid metabolism	68 (0.41%)	89 (0.41%)	0.493002	0.833304	ko00071
159	Prion diseases	68 (0.41%)	89 (0.41%)	0.493002	0.833304	ko05020
160	Sphingolipid metabolism	71 (0.43%)	93 (0.43%)	0.495725	0.833304	ko00600
161	Glycosphingolipid biosynthesis - ganglio series	24 (0.15%)	31 (0.14%)	0.507333	0.847617	ko00604
162	Plant-pathogen interaction	33 (0.2%)	43 (0.2%)	0.517463	0.858456	ko04626
163	Complement and coagulation cascades	169 (1.03%)	223 (1.03%)	0.520087	0.858456	ko04610
164	Various types of N-glycan biosynthesis	51 (0.31%)	67 (0.31%)	0.532049	0.864278	ko00513
165	Cardiac muscle contraction	100 (0.61%)	132 (0.61%)	0.537642	0.864278	ko04260
166	D-Arginine and D-ornithine metabolism	11 (0.07%)	14 (0.06%)	0.544918	0.864278	ko00472
167	Taurine and hypotaurine metabolism	11 (0.07%)	14 (0.06%)	0.544918	0.864278	ko00430
168	Penicillin and cephalosporin biosynthesis	11 (0.07%)	14 (0.06%)	0.544918	0.864278	ko00311
169	Non-homologous end-joining	14 (0.09%)	18 (0.08%)	0.545273	0.864278	ko03450
170	Ubiquinone and other terpenoid-quinone biosynthesis	8 (0.05%)	10 (0.05%)	0.545694	0.864278	ko00130
171	Ethylbenzene degradation	2 (0.01%)	2 (0.01%)	0.57254	0.896435	ko00642
172	Phenylpropanoid biosynthesis	2 (0.01%)	2 (0.01%)	0.57254	0.896435	ko00940
173	Rheumatoid arthritis	107 (0.65%)	142 (0.65%)	0.579942	0.902484	ko05323
174	Renin-angiotensin system	22 (0.13%)	29 (0.13%)	0.590002	0.902484	ko04614
175	Malaria	76 (0.46%)	101 (0.47%)	0.592255	0.902484	ko05144
176	Arginine and proline metabolism	76 (0.46%)	101 (0.47%)	0.592255	0.902484	ko00330
177	Staphylococcus aureus infection	79 (0.48%)	105 (0.48%)	0.592873	0.902484	ko05150
178	Tropane, piperidine and pyridine alkaloid biosynthesis	13 (0.08%)	17 (0.08%)	0.599413	0.907399	ko00960
179	Glycerophospholipid metabolism	123 (0.75%)	164 (0.76%)	0.619856	0.933189	ko00564
180	Glycosaminoglycan biosynthesis - keratan sulfate	18 (0.11%)	24 (0.11%)	0.636948	0.953682	ko00533
181	Chloroalkane and chloroalkene degradation	15 (0.09%)	20 (0.09%)	0.644056	0.959083	ko00625
182	Jak-STAT signaling pathway	226 (1.38%)	302 (1.39%)	0.661418	0.979613	ko04630
183	Cyanoamino acid metabolism	6 (0.04%)	8 (0.04%)	0.6951	1	ko00460
184	Betalain biosynthesis	6 (0.04%)	8 (0.04%)	0.6951	1	ko00965
185	Homologous recombination	39 (0.24%)	53 (0.24%)	0.703179	1	ko03440
186	Phenylalanine metabolism	22 (0.13%)	30 (0.14%)	0.704415	1	ko00360
187	Fat digestion and absorption	59 (0.36%)	80 (0.37%)	0.707619	1	ko04975
188	Terpenoid backbone biosynthesis	16 (0.1%)	22 (0.1%)	0.725058	1	ko00900
189	Nicotinate and nicotinamide metabolism	38 (0.23%)	52 (0.24%)	0.730687	1	ko00760
190	Vitamin B6 metabolism	8 (0.05%)	11 (0.05%)	0.731531	1	ko00750
191	Carbon fixation in photosynthetic organisms	21 (0.13%)	29 (0.13%)	0.7412	1	ko00710
192	Glycosaminoglycan biosynthesis - chondroitin sulfate	21 (0.13%)	29 (0.13%)	0.7412	1	ko00532
193	Glycosphingolipid biosynthesis - lacto and neolacto series	32 (0.19%)	44 (0.2%)	0.741636	1	ko00601
194	Alanine, aspartate and glutamate metabolism	32 (0.19%)	44 (0.2%)	0.741636	1	ko00250
195	Valine, leucine and isoleucine degradation	60 (0.37%)	82 (0.38%)	0.748235	1	ko00280
196	Pentose and glucuronate interconversions	29 (0.18%)	40 (0.18%)	0.748362	1	ko00040
197	Metabolic pathways	1476 (8.99%)	1966 (9.06%)	0.748479	1	ko01100
198	D-Glutamine and D-glutamate metabolism	3 (0.02%)	4 (0.02%)	0.749495	1	ko00471
199	Biotin metabolism	3 (0.02%)	4 (0.02%)	0.749495	1	ko00780
200	Nitrotoluene degradation	3 (0.02%)	4 (0.02%)	0.749495	1	ko00633
201	Thiamine metabolism	3 (0.02%)	4 (0.02%)	0.749495	1	ko00730
202	Biosynthesis of vancomycin group antibiotics	1 (0.01%)	1 (0%)	0.75667	1	ko01055
203	Polyketide sugar unit biosynthesis	1 (0.01%)	1 (0%)	0.75667	1	ko00523
204	Flavone and flavonol biosynthesis	1 (0.01%)	1 (0%)	0.75667	1	ko00944
205	Ether lipid metabolism	65 (0.4%)	89 (0.41%)	0.762497	1	ko00565
206	PPAR signaling pathway	140 (0.85%)	190 (0.88%)	0.76772	1	ko03320
207	Glycolysis / Gluconeogenesis	76 (0.46%)	104 (0.48%)	0.770504	1	ko00010
208	Phototransduction	64 (0.39%)	88 (0.41%)	0.78144	1	ko04744
209	Caprolactam degradation	7 (0.04%)	10 (0.05%)	0.791285	1	ko00930
210	Biosynthesis of unsaturated fatty acids	30 (0.18%)	42 (0.19%)	0.797006	1	ko01040
211	Citrate cycle (TCA cycle)	32 (0.19%)	45 (0.21%)	0.814268	1	ko00020
212	Glycosylphosphatidylinositol(GPI)-anchor biosynthesis	29 (0.18%)	41 (0.19%)	0.822501	1	ko00563
213	Arachidonic acid metabolism	115 (0.7%)	158 (0.73%)	0.827027	1	ko00590
214	Biosynthesis of secondary metabolites	269 (1.64%)	365 (1.68%)	0.828064	1	ko01110
215	Natural killer cell mediated cytotoxicity	186 (1.13%)	254 (1.17%)	0.837743	1	ko04650
216	Benzoate degradation	13 (0.08%)	19 (0.09%)	0.842921	1	ko00362
217	Autoimmune thyroid disease	88 (0.54%)	122 (0.56%)	0.845756	1	ko05320
218	Drug metabolism - cytochrome P450	96 (0.58%)	133 (0.61%)	0.850927	1	ko00982
219	Naphthalene degradation	2 (0.01%)	3 (0.01%)	0.851199	1	ko00626
220	Circadian rhythm - plant	2 (0.01%)	3 (0.01%)	0.851199	1	ko04712
221	Biosynthesis of ansamycins	2 (0.01%)	3 (0.01%)	0.851199	1	ko01051
222	Novobiocin biosynthesis	2 (0.01%)	3 (0.01%)	0.851199	1	ko00401
223	Protein export	25 (0.15%)	36 (0.17%)	0.856117	1	ko03060
224	Base excision repair	38 (0.23%)	54 (0.25%)	0.85652	1	ko03410
225	Synthesis and degradation of ketone bodies	10 (0.06%)	15 (0.07%)	0.865999	1	ko00072
226	Proteasome	37 (0.23%)	53 (0.24%)	0.874561	1	ko03050
227	Riboflavin metabolism	12 (0.07%)	18 (0.08%)	0.875948	1	ko00740
228	Starch and sucrose metabolism	58 (0.35%)	82 (0.38%)	0.87817	1	ko00500
229	Primary bile acid biosynthesis	24 (0.15%)	35 (0.16%)	0.87842	1	ko00120
230	Metabolism of xenobiotics by cytochrome P450	77 (0.47%)	108 (0.5%)	0.878535	1	ko00980
231	Microbial metabolism in diverse environments	227 (1.38%)	311 (1.43%)	0.879166	1	ko01120
232	Glycosphingolipid biosynthesis - globo series	14 (0.09%)	21 (0.1%)	0.885376	1	ko00603
233	Aminobenzoate degradation	26 (0.16%)	38 (0.18%)	0.888529	1	ko00627
234	Cytokine-cytokine receptor interaction	268 (1.63%)	367 (1.69%)	0.893611	1	ko04060
235	Antigen processing and presentation	116 (0.71%)	162 (0.75%)	0.90181	1	ko04612
236	Taste transduction	58 (0.35%)	83 (0.38%)	0.910516	1	ko04742
237	Circadian rhythm - fly	6 (0.04%)	10 (0.05%)	0.929467	1	ko04711
238	Retinol metabolism	81 (0.49%)	116 (0.53%)	0.93999	1	ko00830
239	Fructose and mannose metabolism	60 (0.37%)	87 (0.4%)	0.94038	1	ko00051
240	Maturity onset diabetes of the young	32 (0.19%)	48 (0.22%)	0.943658	1	ko04950
241	Fatty acid elongation in mitochondria	7 (0.04%)	12 (0.06%)	0.951817	1	ko00062
242	Lysine biosynthesis	2 (0.01%)	4 (0.02%)	0.952903	1	ko00300
243	Indole alkaloid biosynthesis	2 (0.01%)	4 (0.02%)	0.952903	1	ko00901
244	Carbon fixation pathways in prokaryotes	15 (0.09%)	24 (0.11%)	0.953814	1	ko00720
245	Huntington's disease	203 (1.24%)	284 (1.31%)	0.955871	1	ko05016
246	N-Glycan biosynthesis	59 (0.36%)	87 (0.4%)	0.963562	1	ko00510
247	Methane metabolism	32 (0.19%)	49 (0.23%)	0.964426	1	ko00680
248	Other glycan degradation	25 (0.15%)	39 (0.18%)	0.964937	1	ko00511
249	Bisphenol degradation	10 (0.06%)	17 (0.08%)	0.965453	1	ko00363
250	Peroxisome	128 (0.78%)	183 (0.84%)	0.968905	1	ko04146
251	Caffeine metabolism	6 (0.04%)	11 (0.05%)	0.969804	1	ko00232
252	Isoquinoline alkaloid biosynthesis	9 (0.05%)	16 (0.07%)	0.976872	1	ko00950
253	African trypanosomiasis	34 (0.21%)	53 (0.24%)	0.979494	1	ko05143
254	Regulation of autophagy	40 (0.24%)	62 (0.29%)	0.983088	1	ko04140
255	Tryptophan metabolism	54 (0.33%)	82 (0.38%)	0.983662	1	ko00380
256	Geraniol degradation	1 (0.01%)	3 (0.01%)	0.985599	1	ko00281
257	Aminoacyl-tRNA biosynthesis	58 (0.35%)	88 (0.41%)	0.985813	1	ko00970
258	Intestinal immune network for IgA production	52 (0.32%)	80 (0.37%)	0.98864	1	ko04672
259	Alzheimer's disease	198 (1.21%)	285 (1.31%)	0.993208	1	ko05010
260	Porphyrin and chlorophyll metabolism	34 (0.21%)	56 (0.26%)	0.995825	1	ko00860
261	Sulfur metabolism	12 (0.07%)	23 (0.11%)	0.996359	1	ko00920
262	Parkinson's disease	124 (0.76%)	185 (0.85%)	0.997035	1	ko05012
263	Phenylalanine, tyrosine and tryptophan biosynthesis	4 (0.02%)	10 (0.05%)	0.997041	1	ko00400
264	Steroid hormone biosynthesis	59 (0.36%)	93 (0.43%)	0.997102	1	ko00140
265	Oxidative phosphorylation	107 (0.65%)	163 (0.75%)	0.998551	1	ko00190
266	Glutathione metabolism	48 (0.29%)	80 (0.37%)	0.999383	1	ko00480
267	Phosphonate and phosphinate metabolism	3 (0.02%)	11 (0.05%)	0.9999	1	ko00440
268	Asthma	23 (0.14%)	47 (0.22%)	0.999981	1	ko05310
269	Systemic lupus erythematosus	122 (0.74%)	210 (0.97%)	1	1	ko05322
270	Olfactory transduction	587 (3.57%)	1220 (5.62%)	1	1	ko04740
271	Ribosome	78 (0.47%)	154 (0.71%)	1	1	ko03010
272
273
274
